# Supplementary material for: Characterizing the Google Books Corpus: Strong Limits to Inferences of Socio-Cultural and Linguistic Evolution
Source: PubMed Central journal article supplement (PMC4596490; doi:10.1371/journal.pone.0137041), 2015-10-07

# Top JSD contributions: 1800s to 1810s

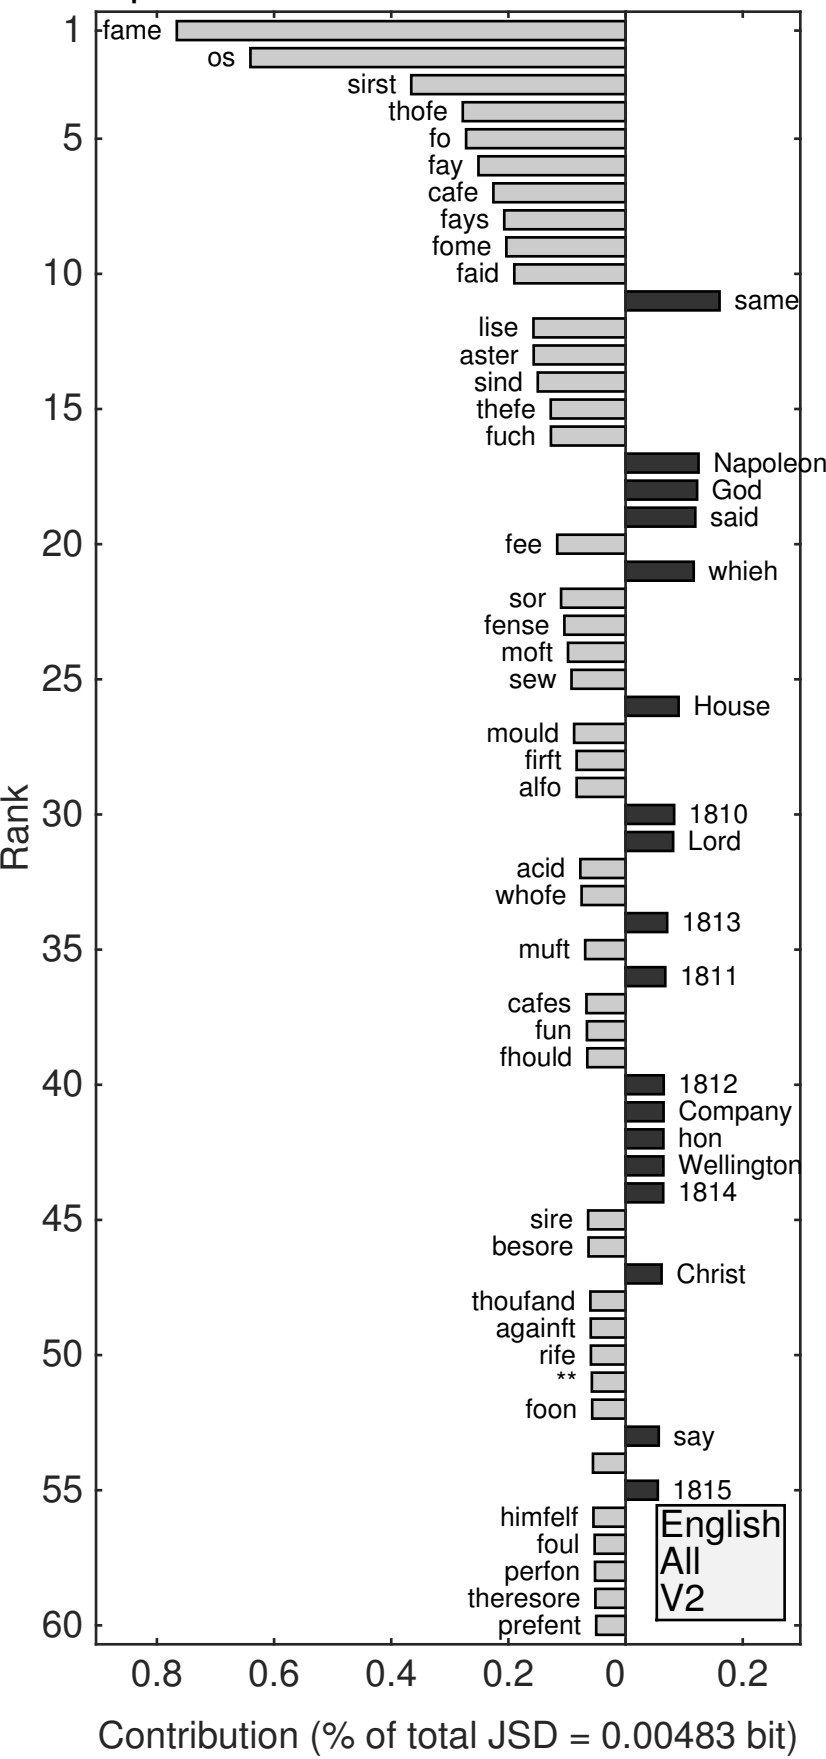

# Top JSD contributions: 1800s to 1820s

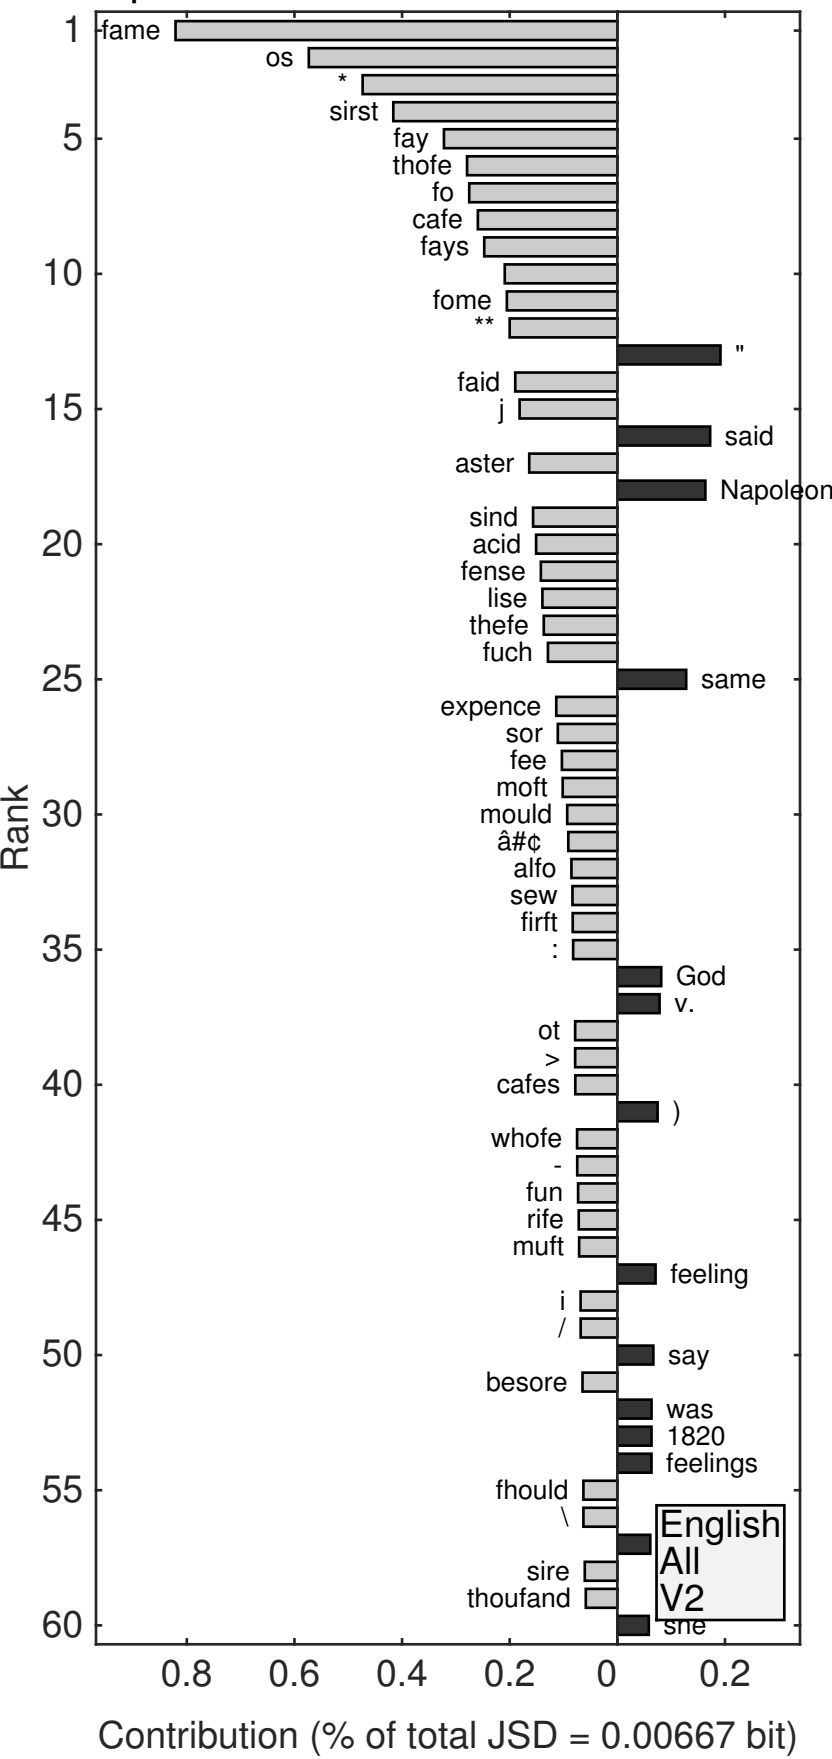

# Top JSD contributions: 1800s to 1830s

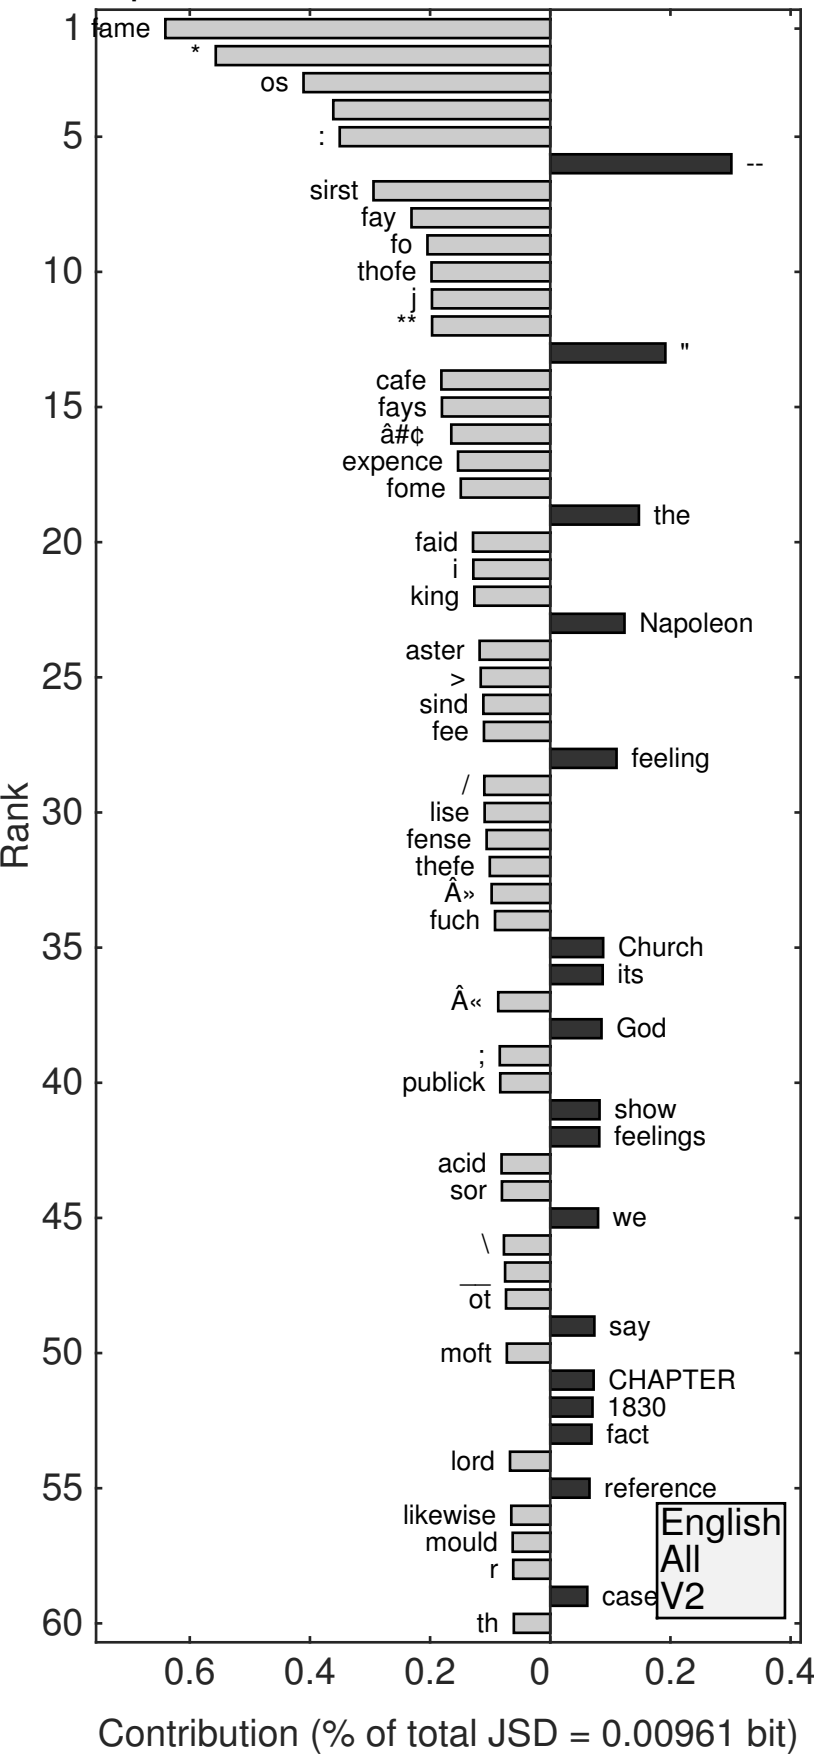

# Top JSD contributions: 1800s to 1840s

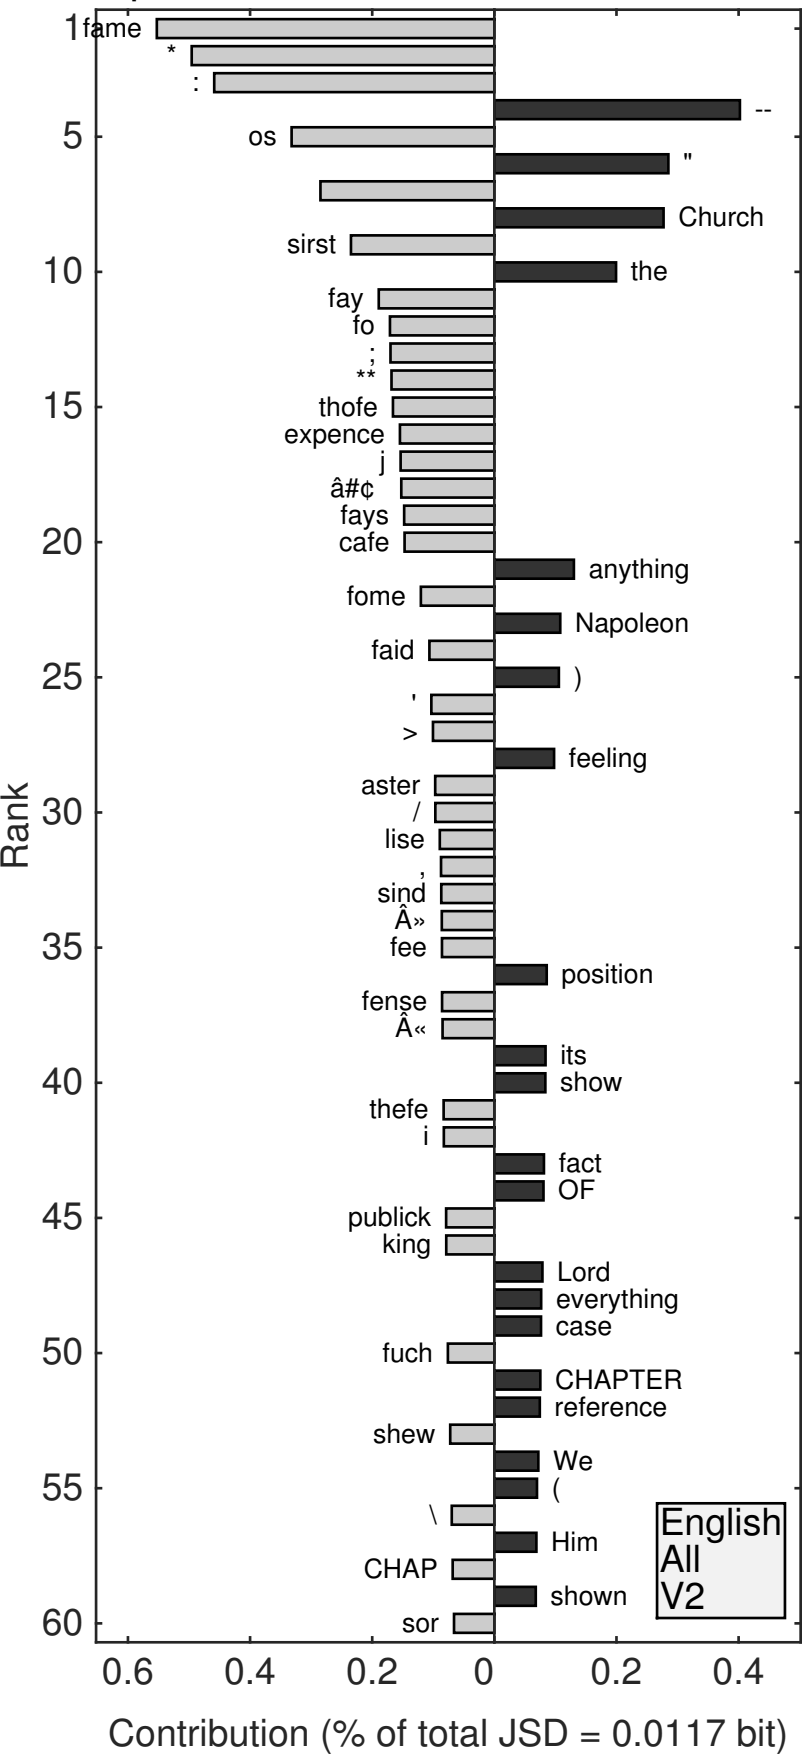

# Top JSD contributions: 1800s to 1850s

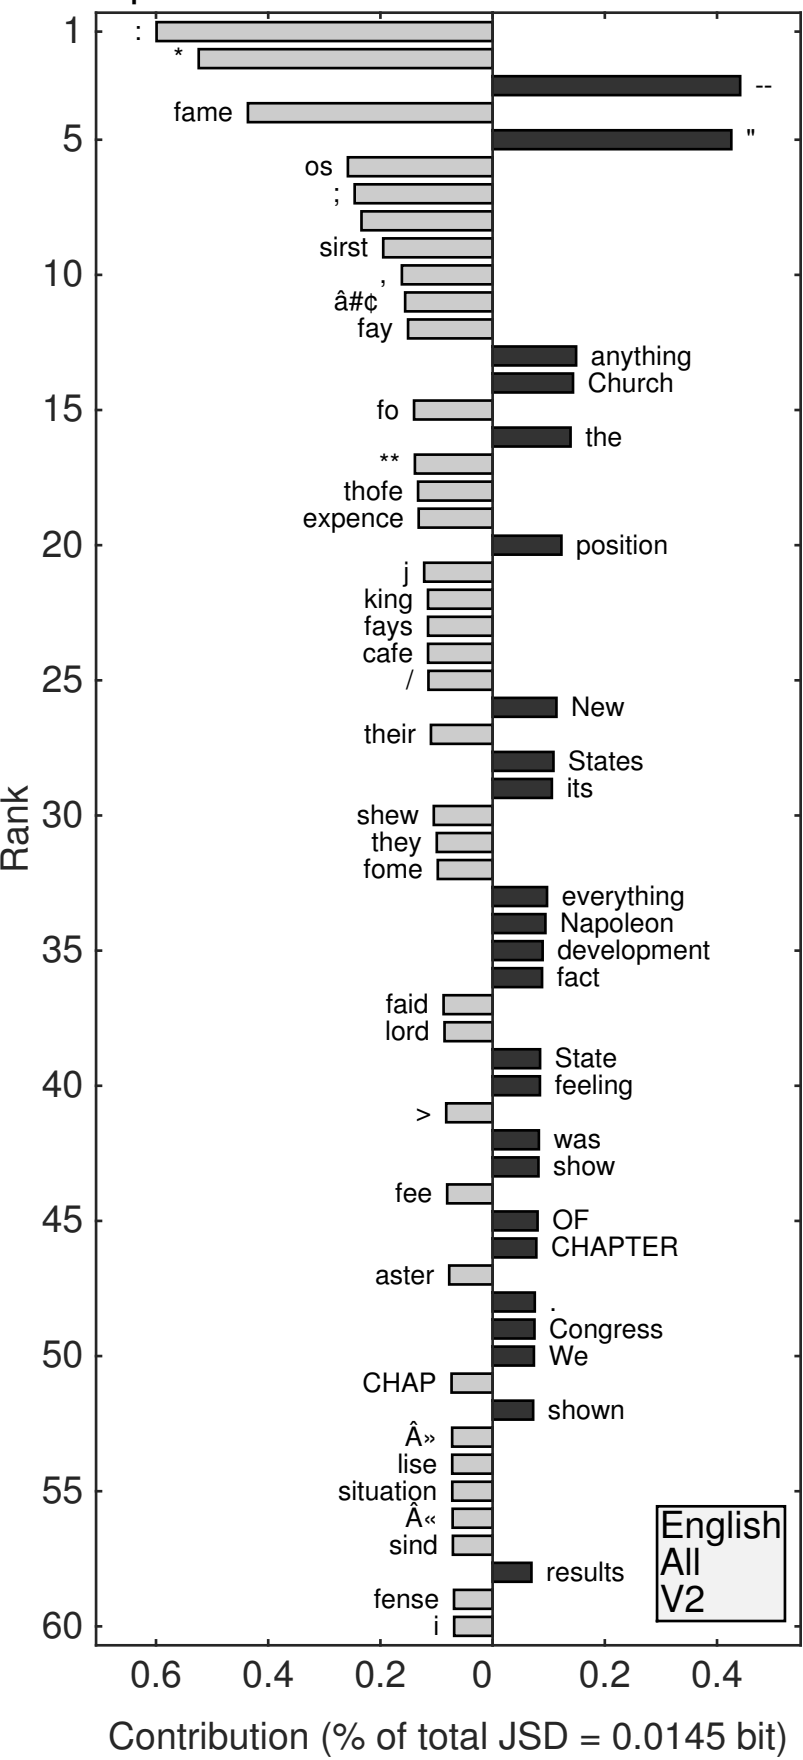

English  
All  
V2

# Top JSD contributions: 1800s to 1860s

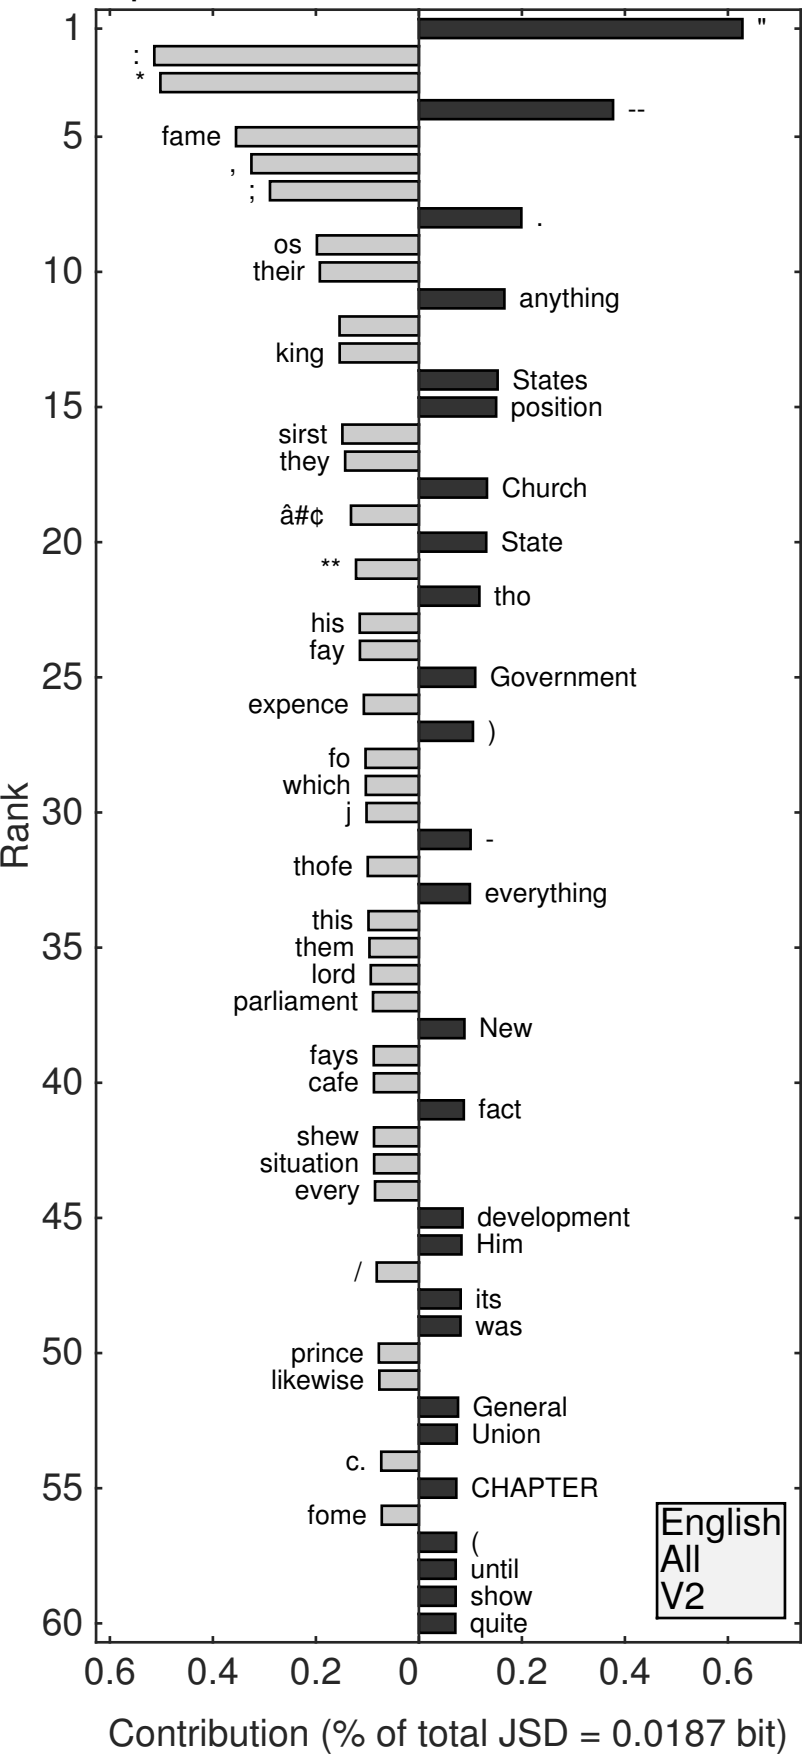

# Top JSD contributions: 1800s to 1870s

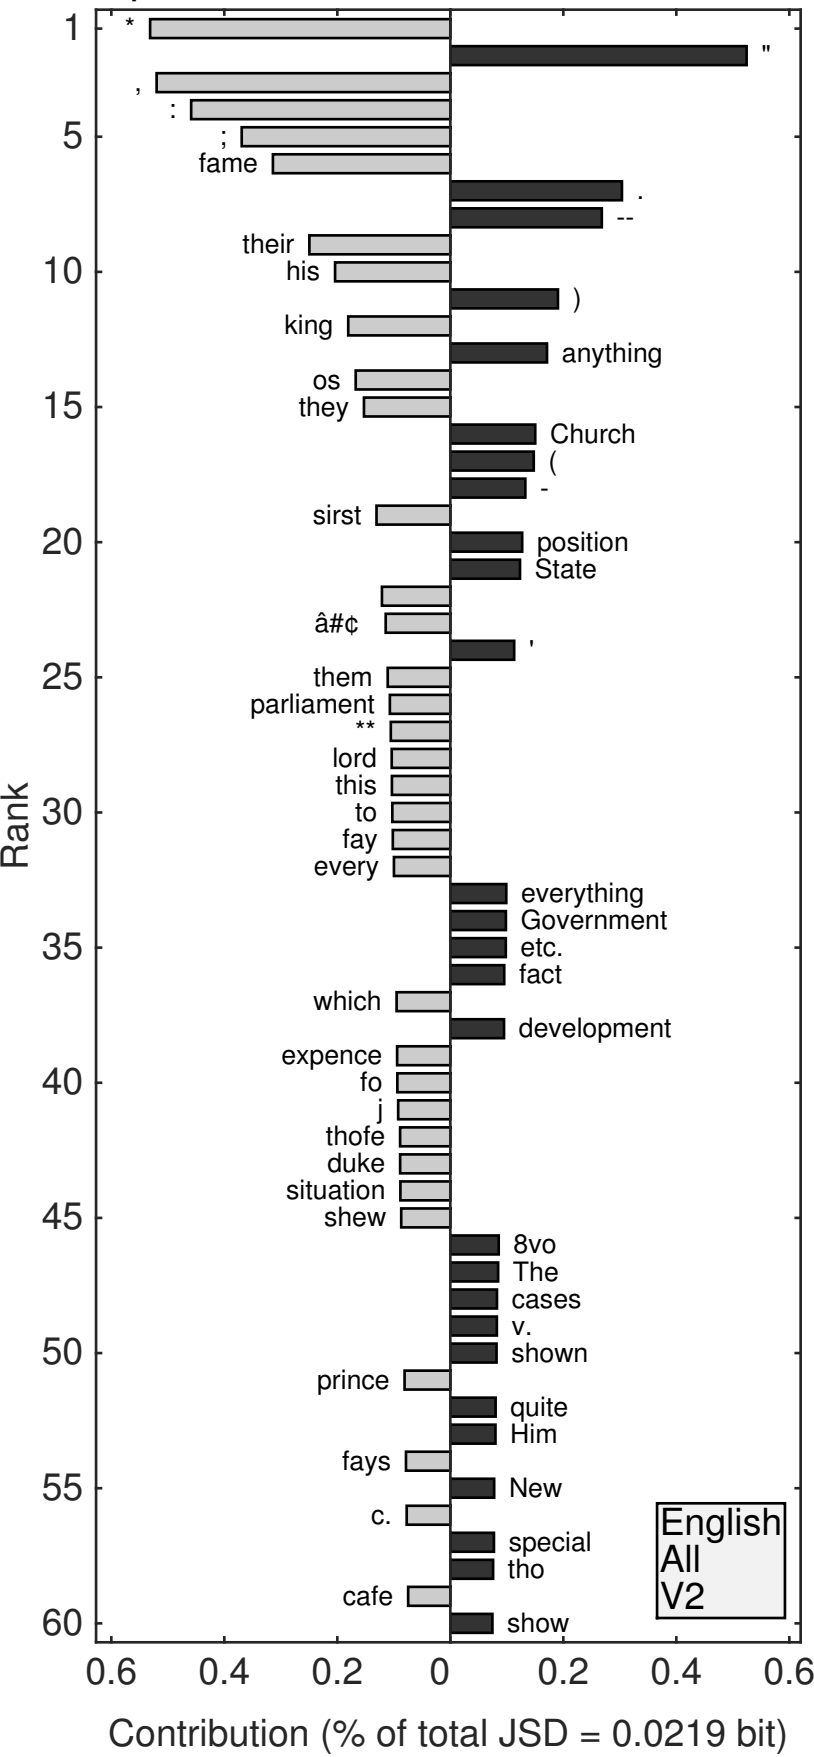

# Top JSD contributions: 1800s to 1880s

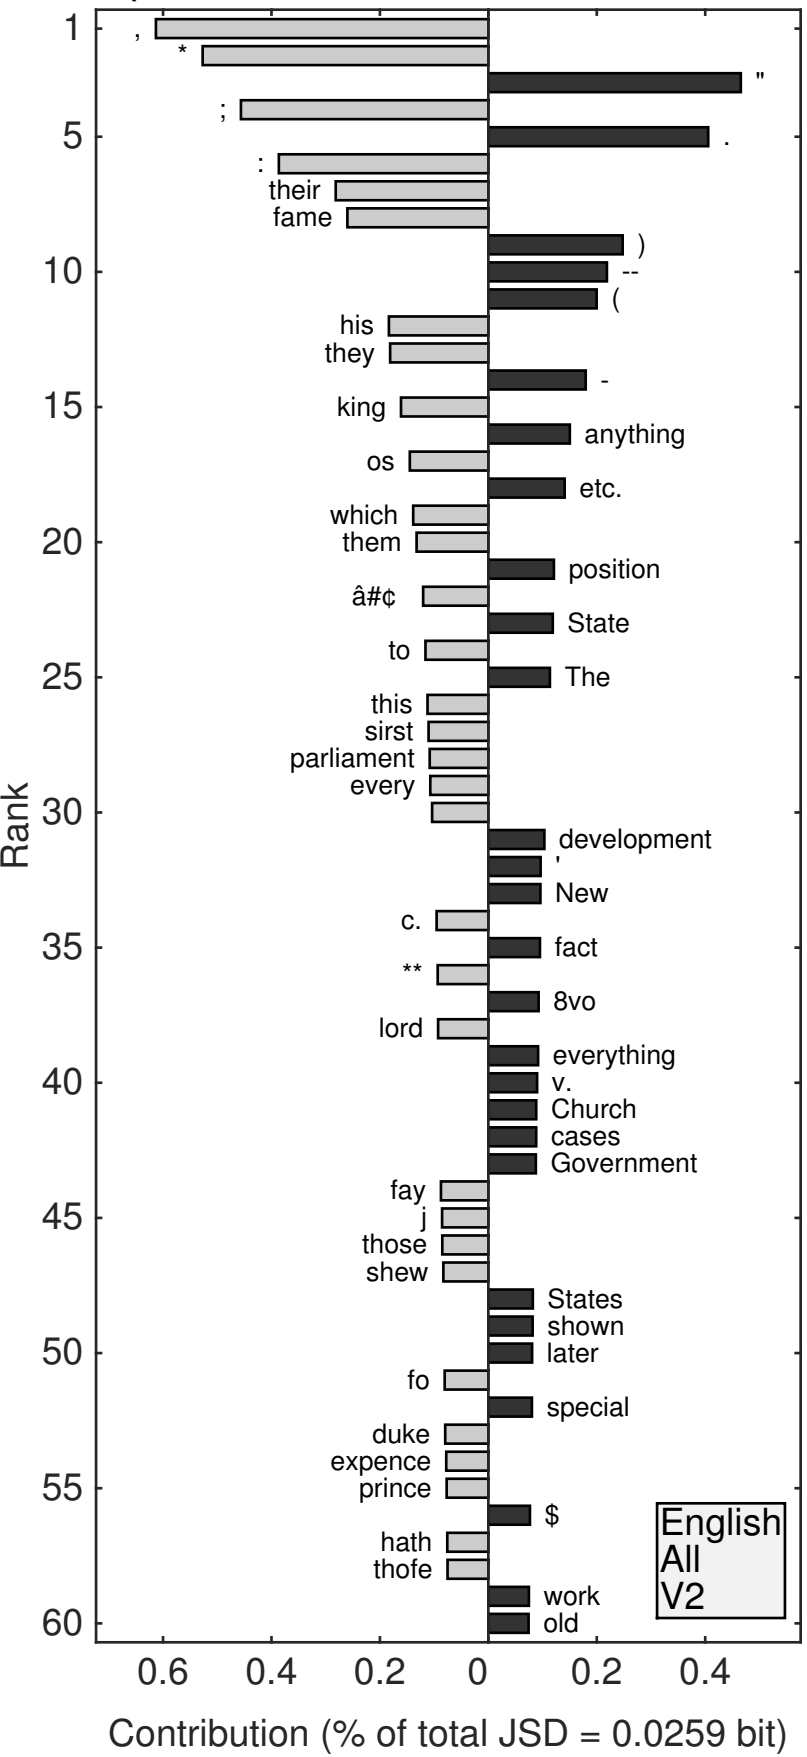



# Top JSD contributions: 1800s to 1890s

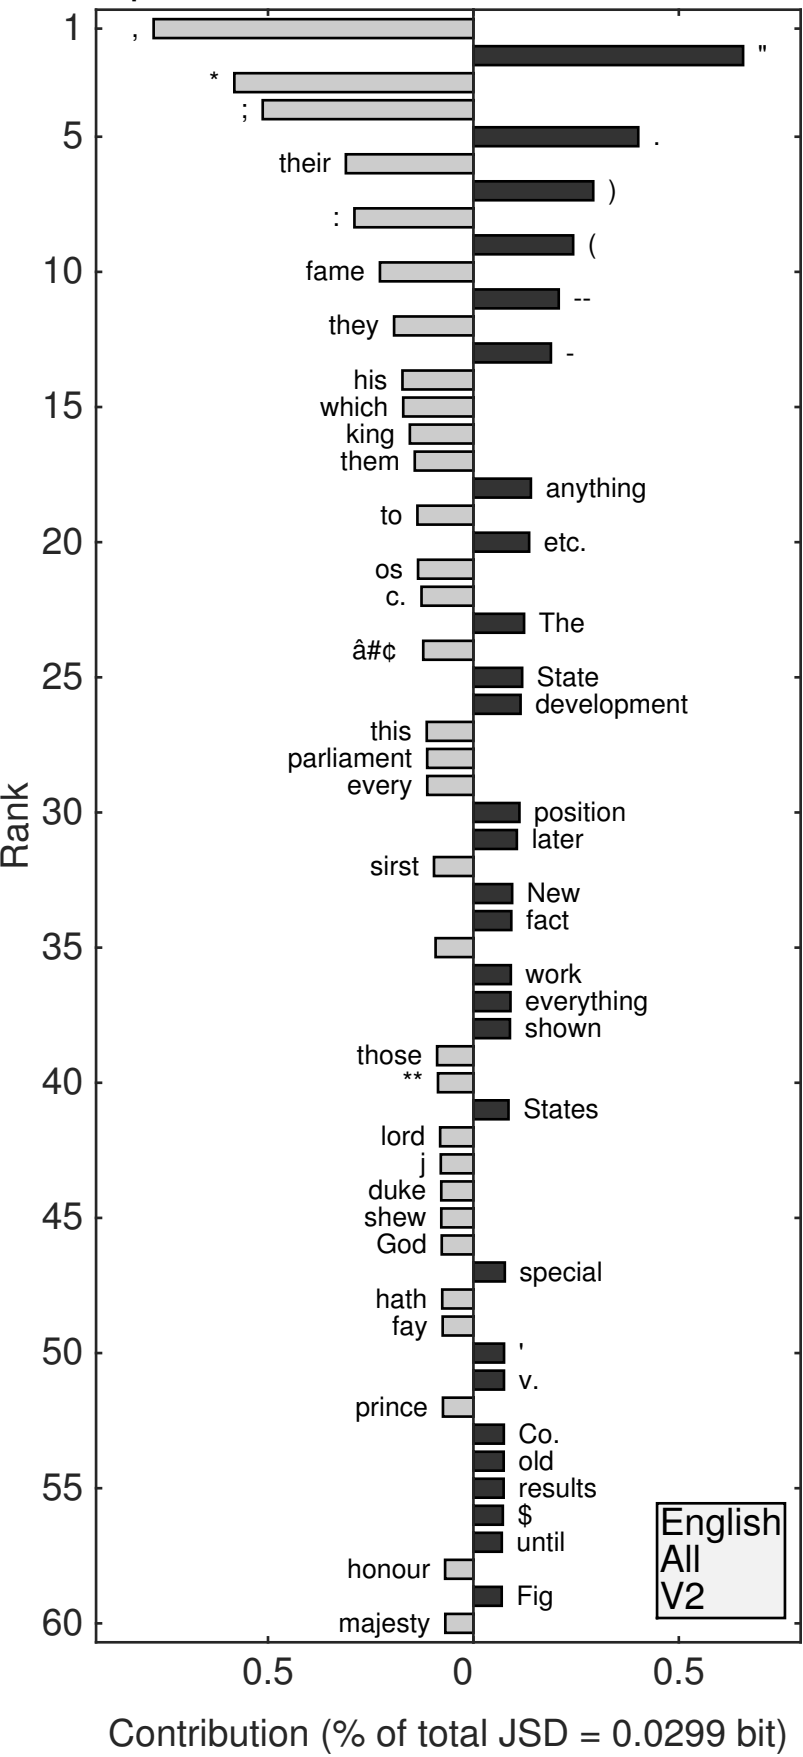

# Top JSD contributions: 1800s to 1900s

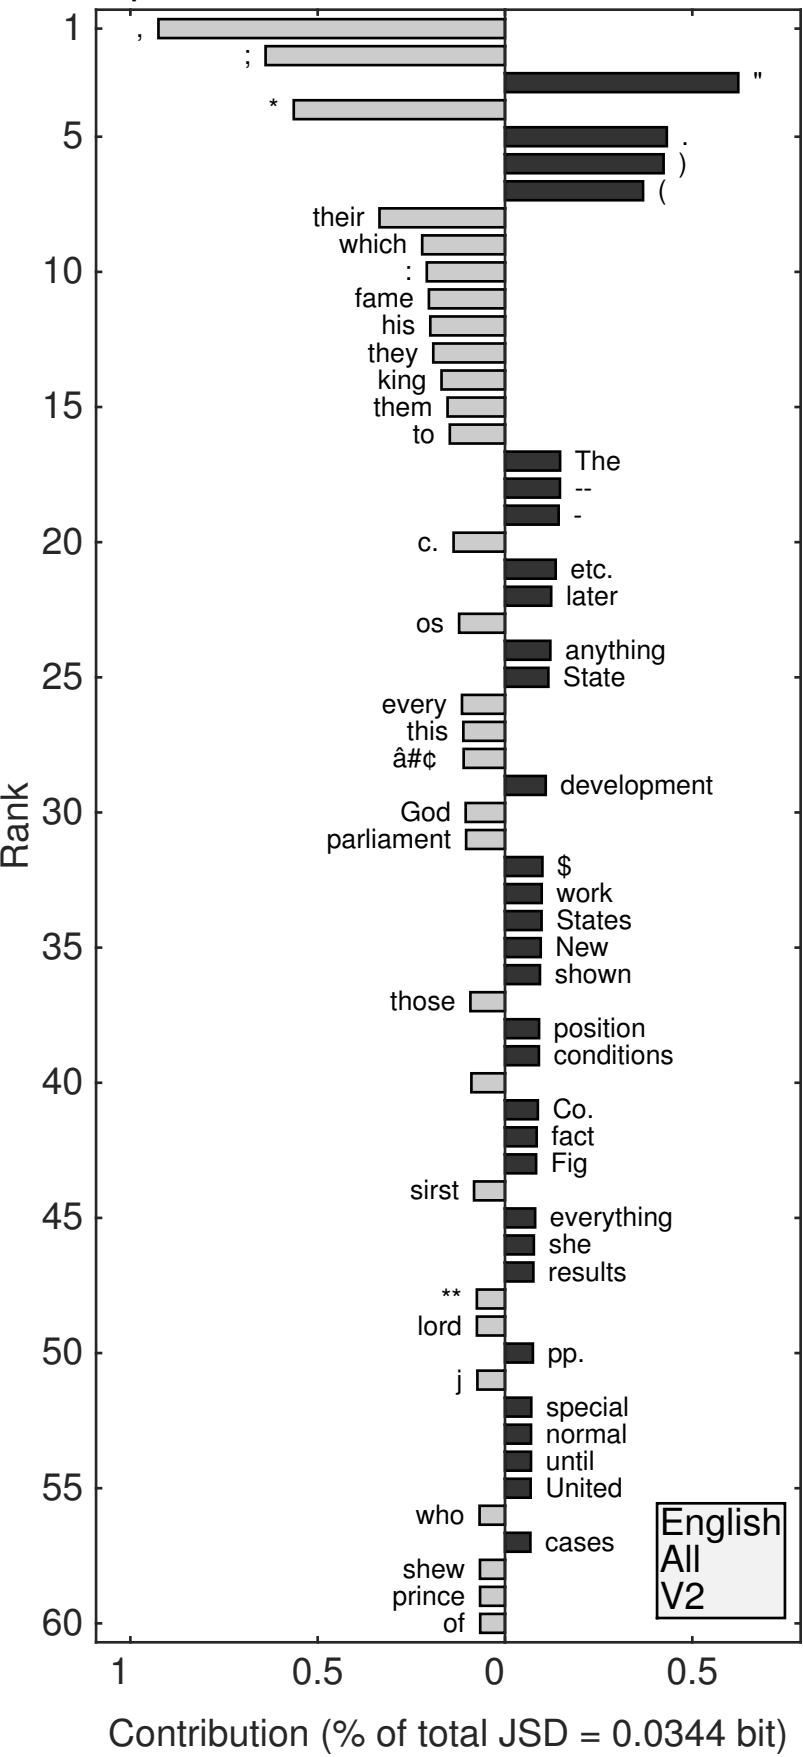

# Top JSD contributions: 1800s to 1910s

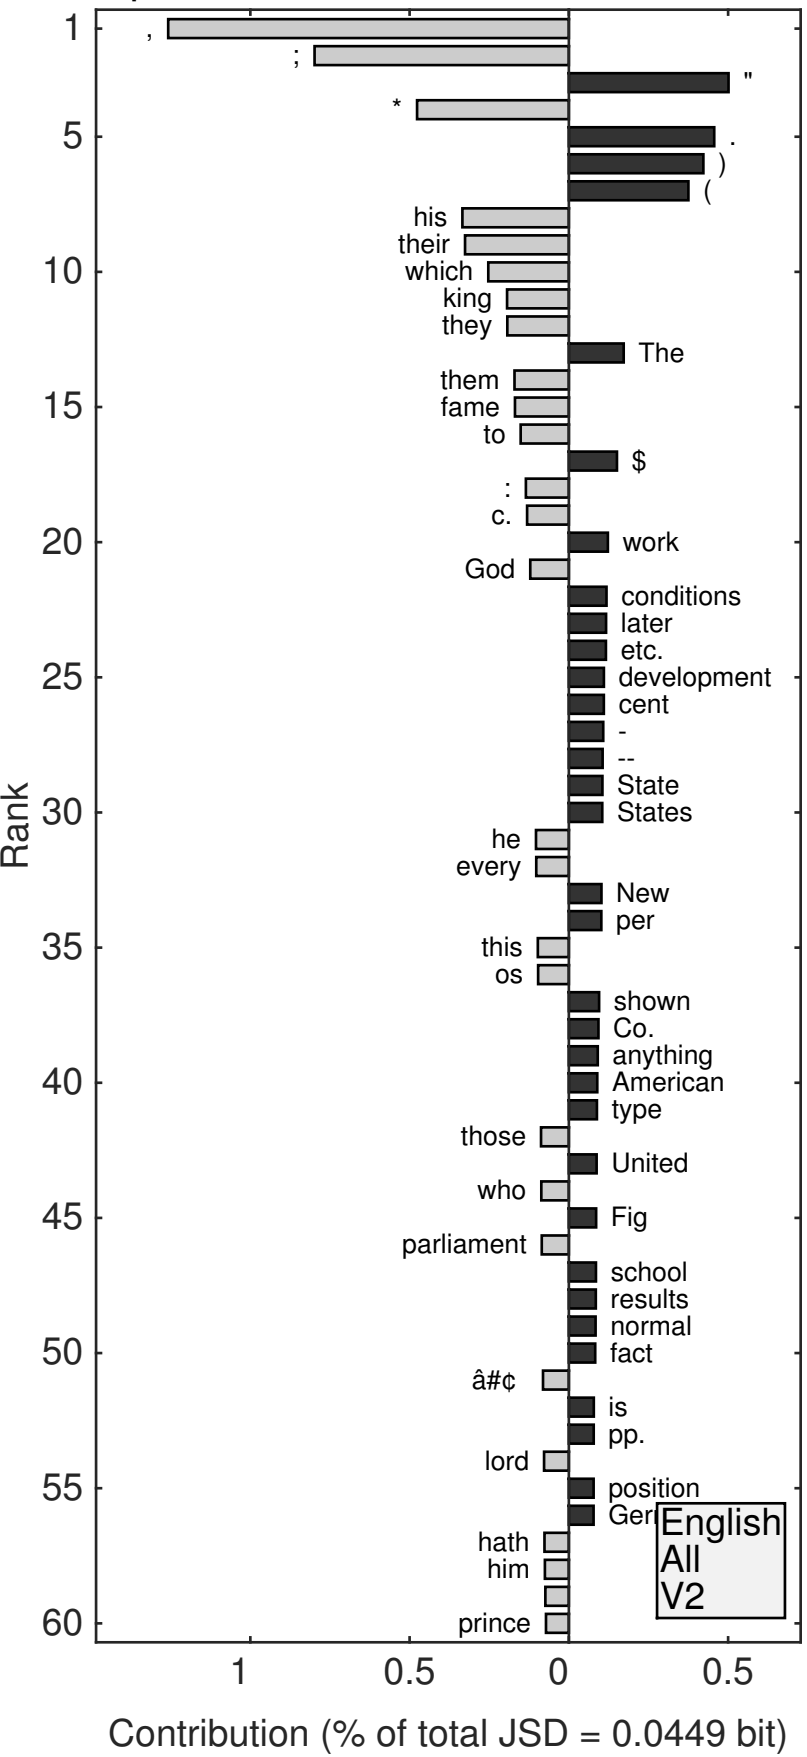

# Top JSD contributions: 1800s to 1920s

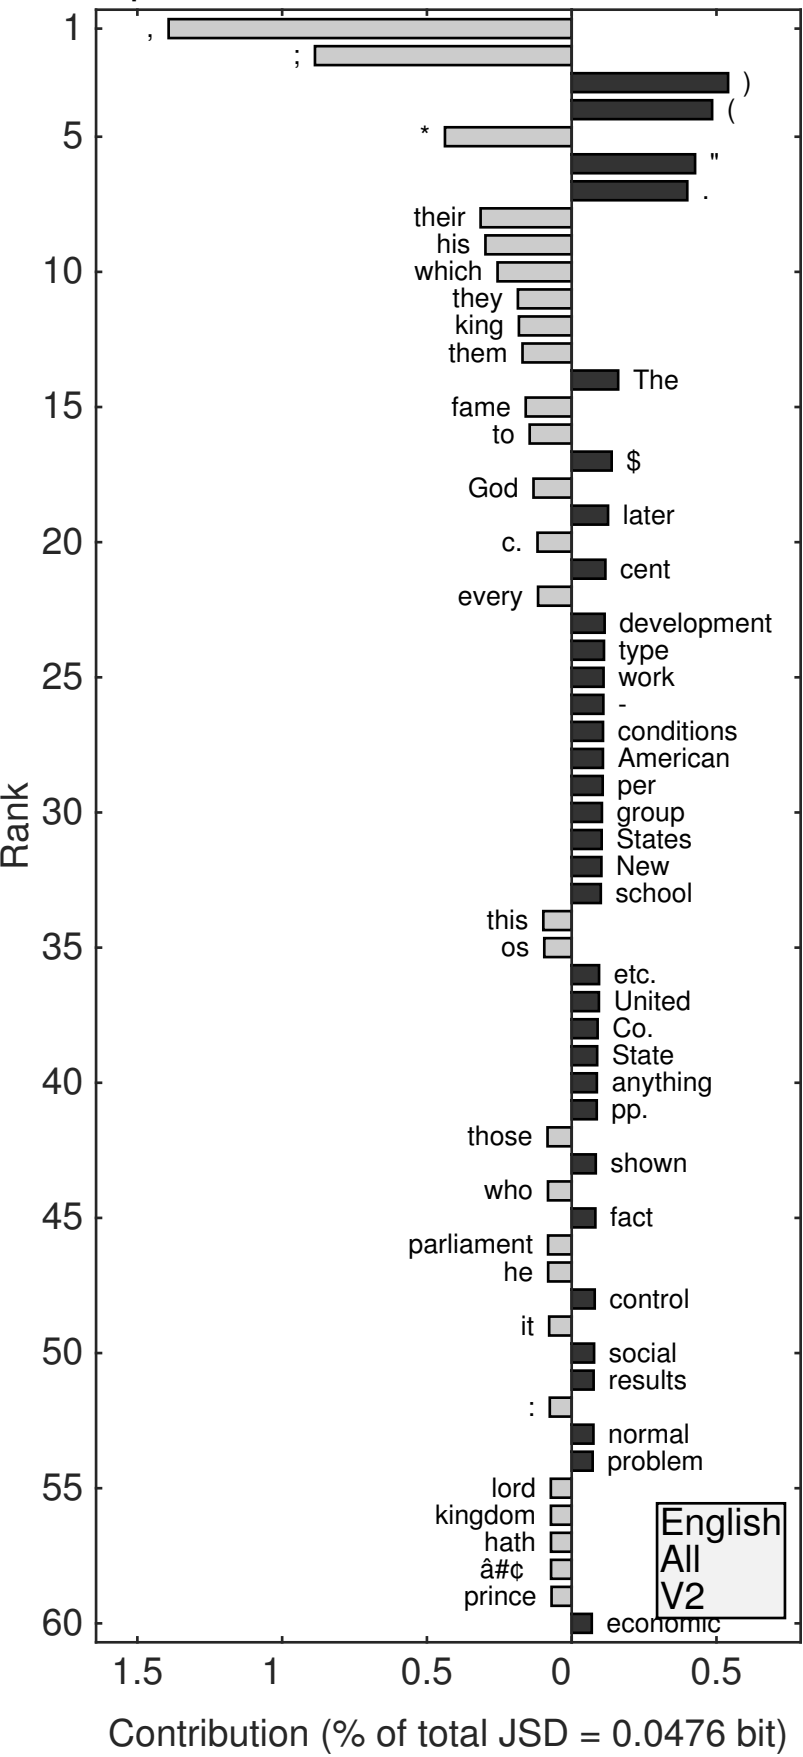

# Top JSD contributions: 1800s to 1930s

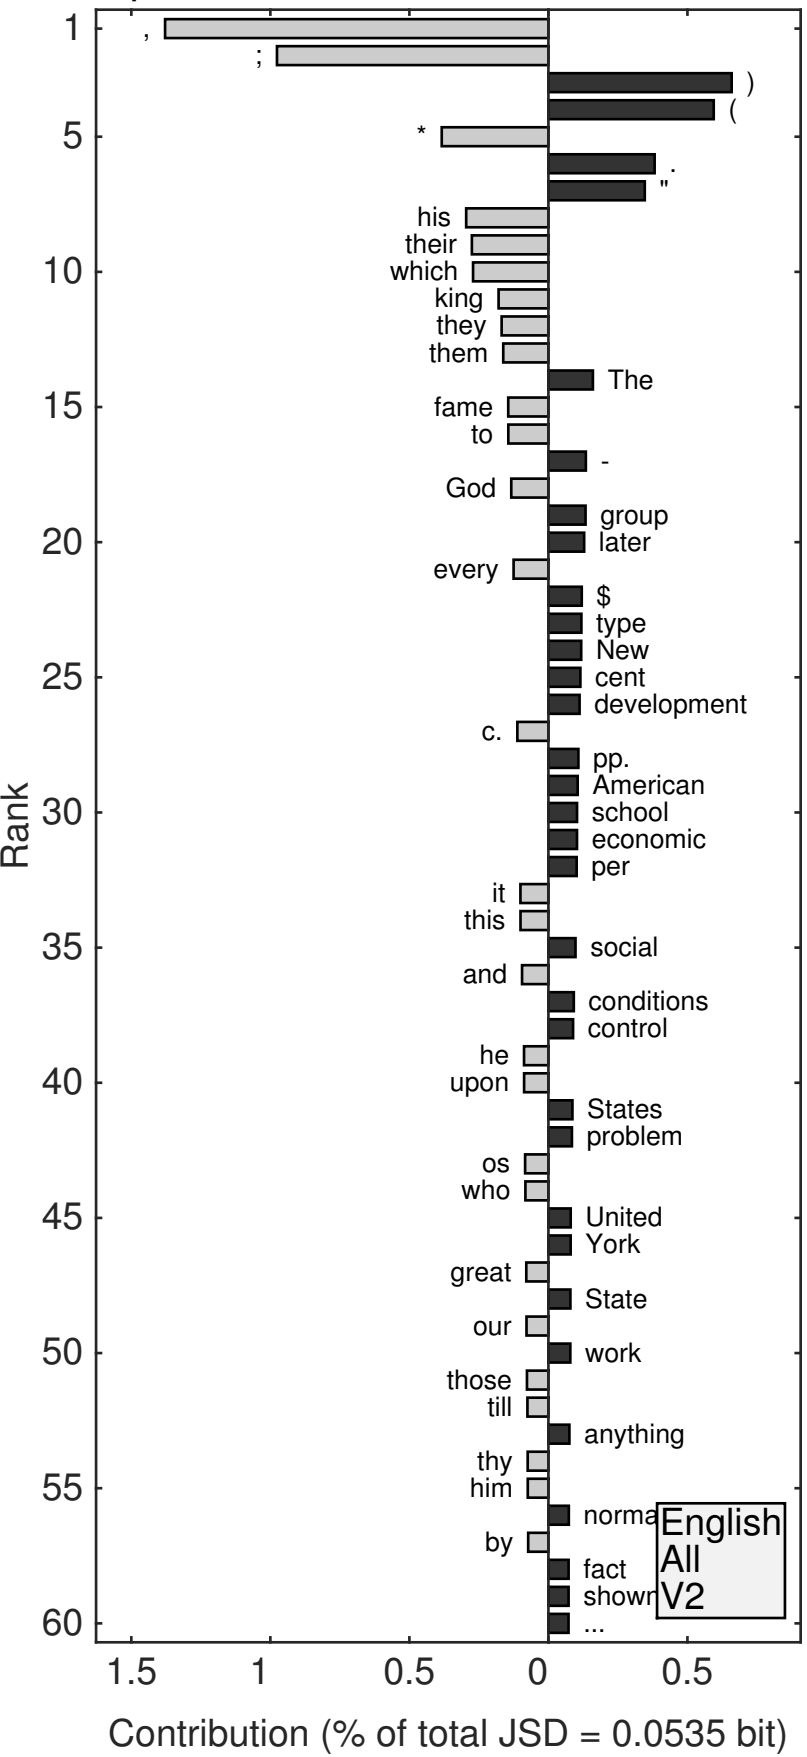

# Top JSD contributions: 1800s to 1940s

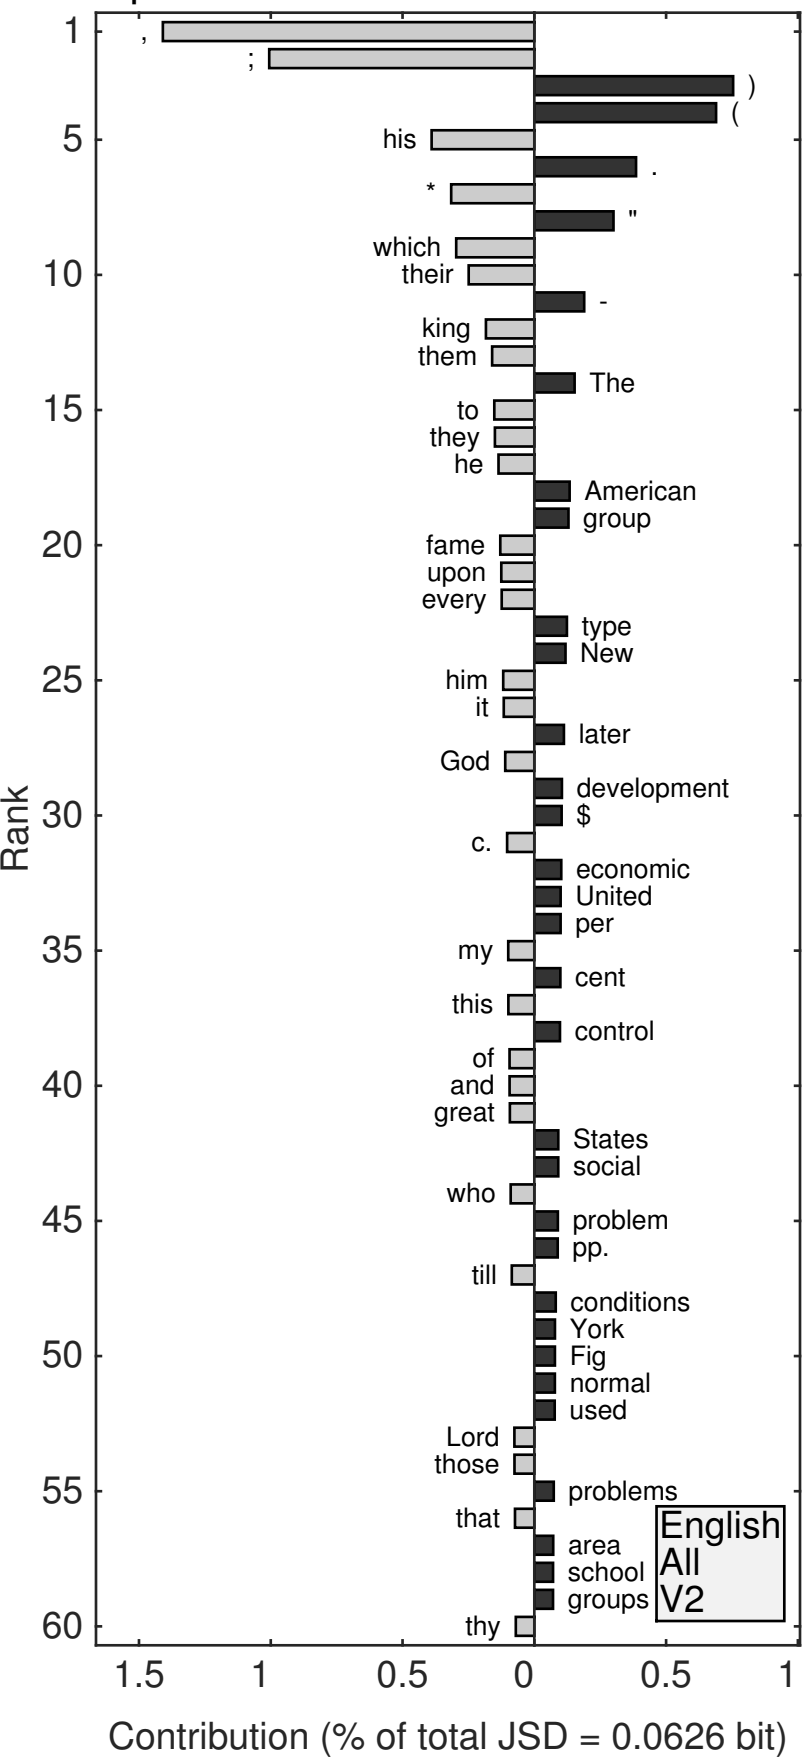

# Top JSD contributions: 1800s to 1950s

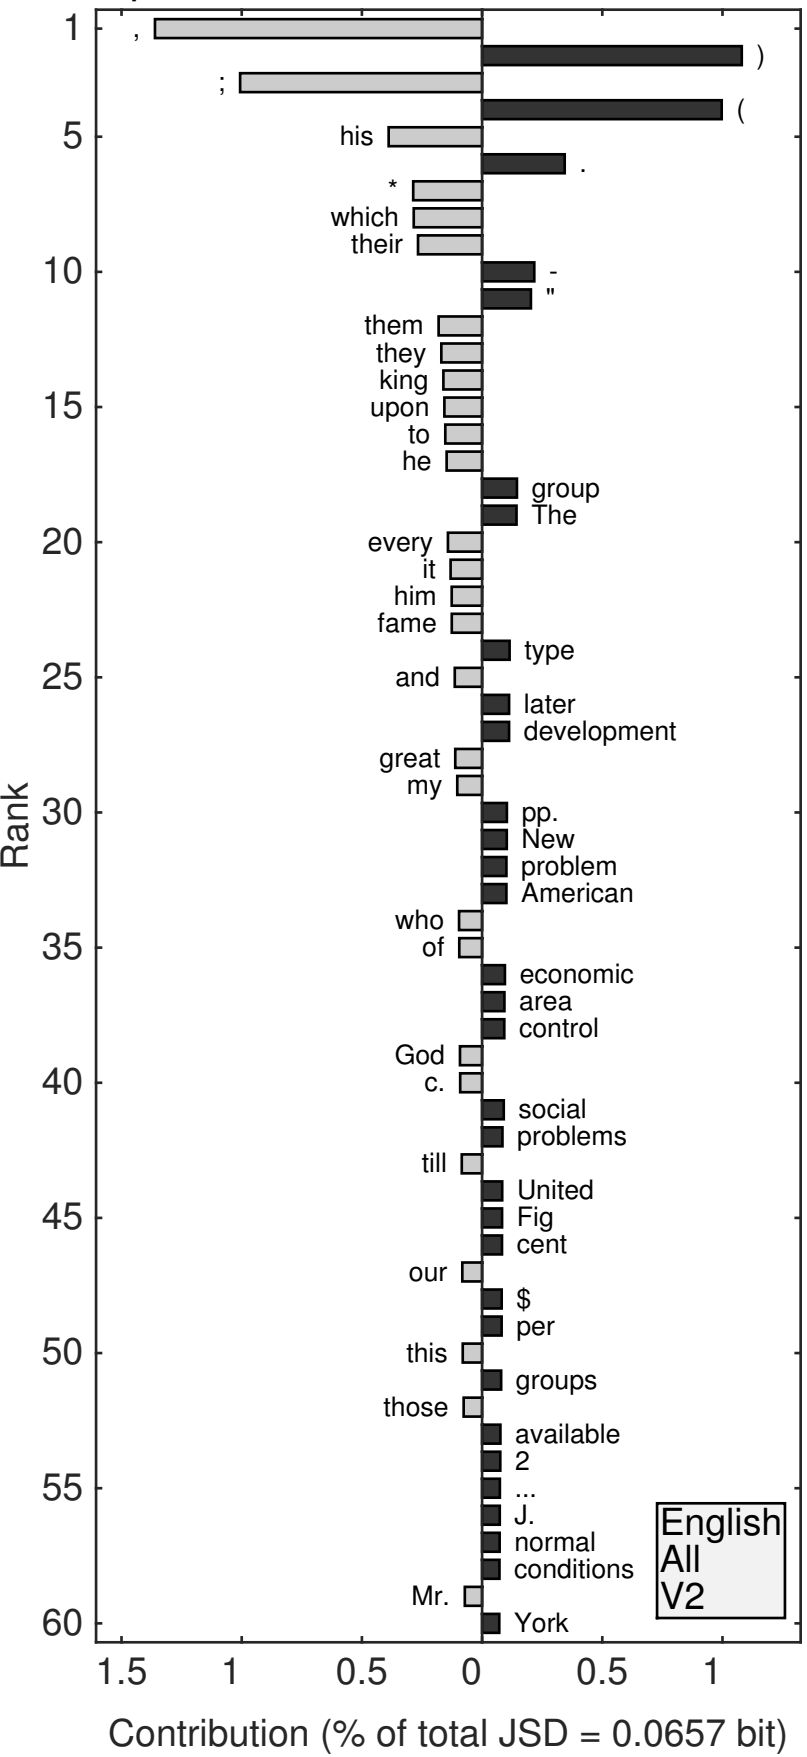

# Top JSD contributions: 1800s to 1960s

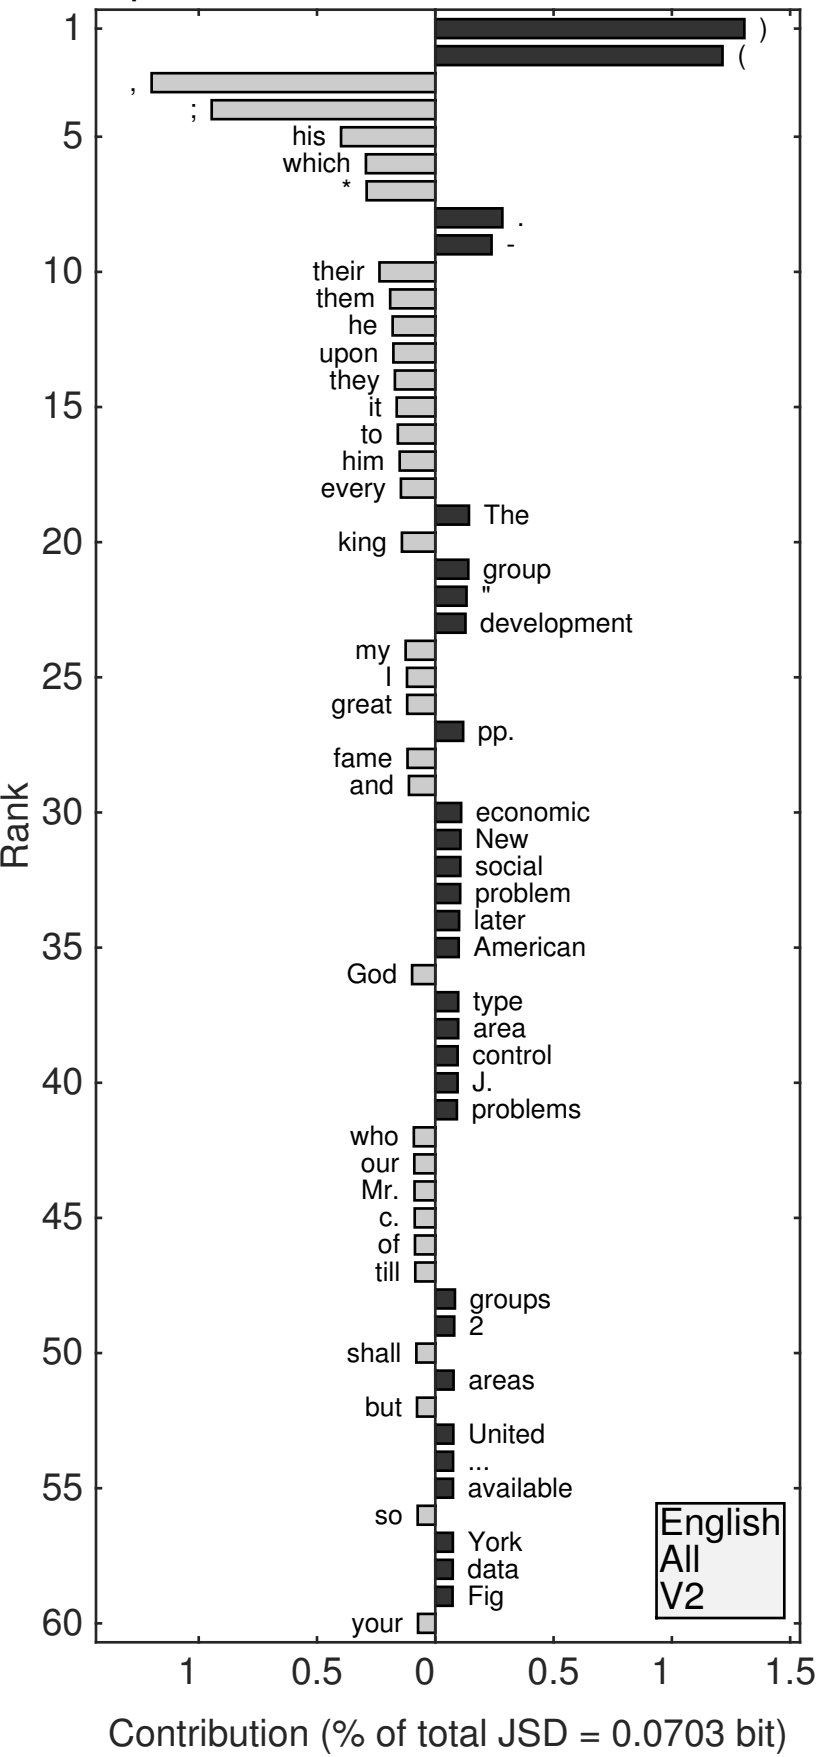



# Top JSD contributions: 1800s to 1970s

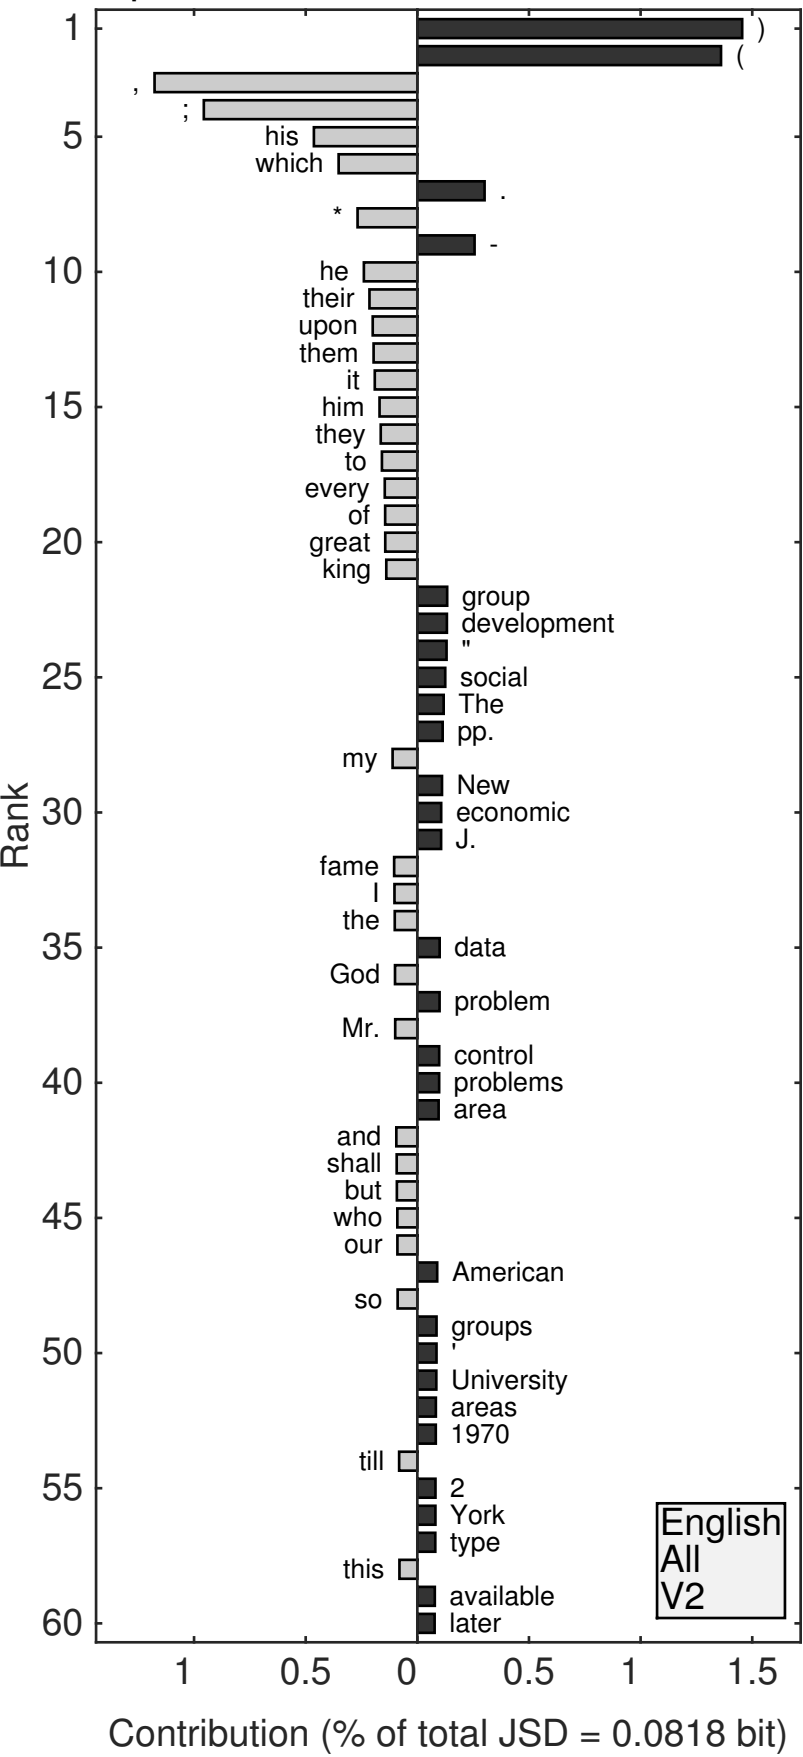

# Top JSD contributions: 1800s to 1980s

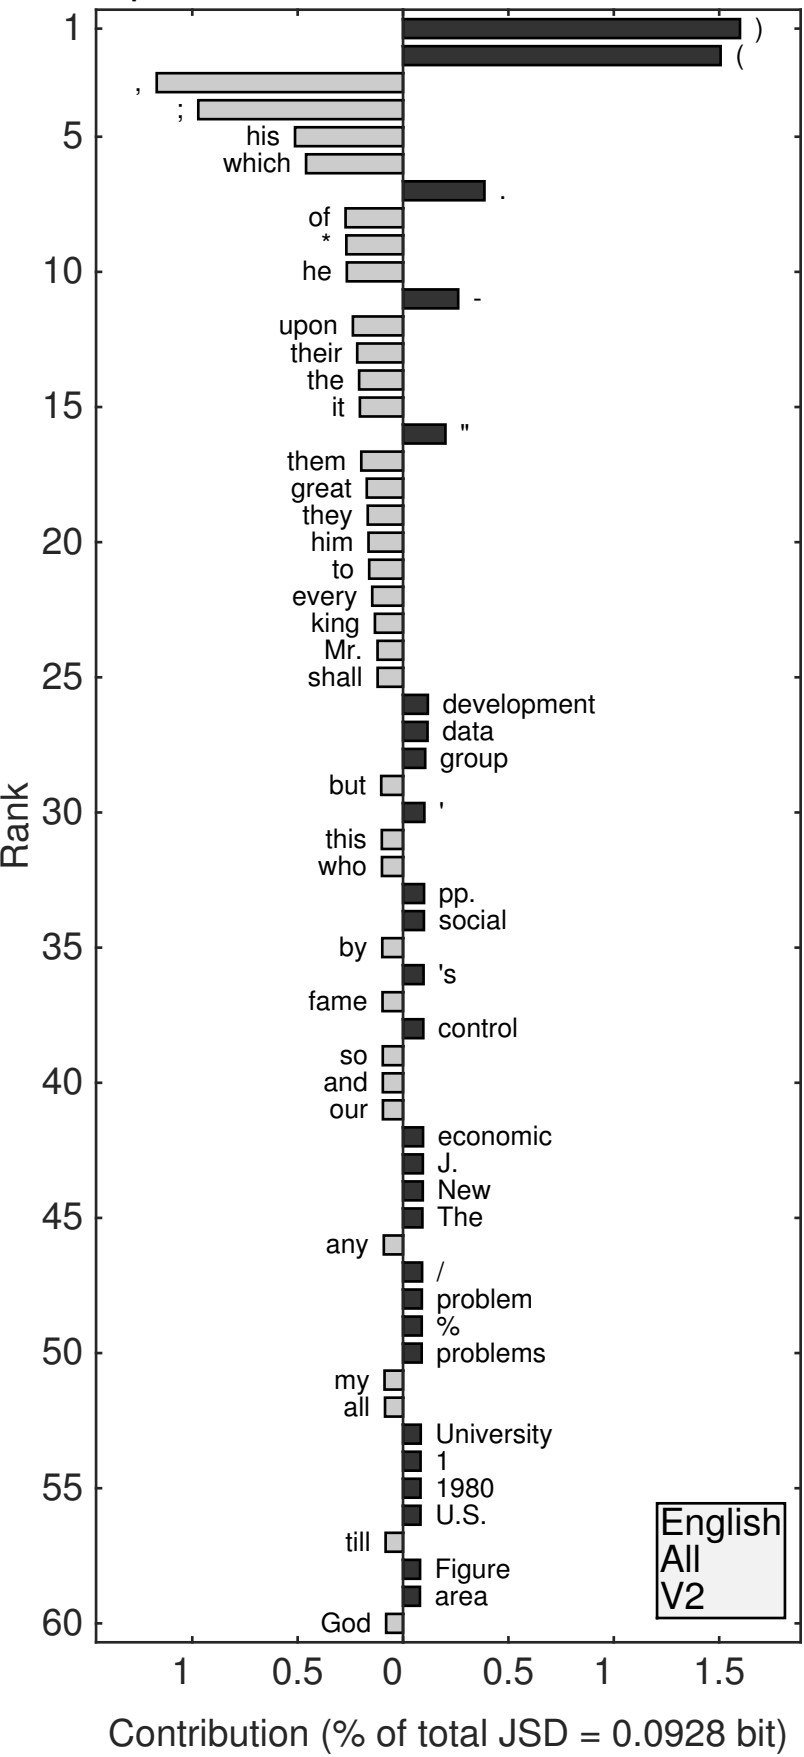

# Top JSD contributions: 1800s to 1990s

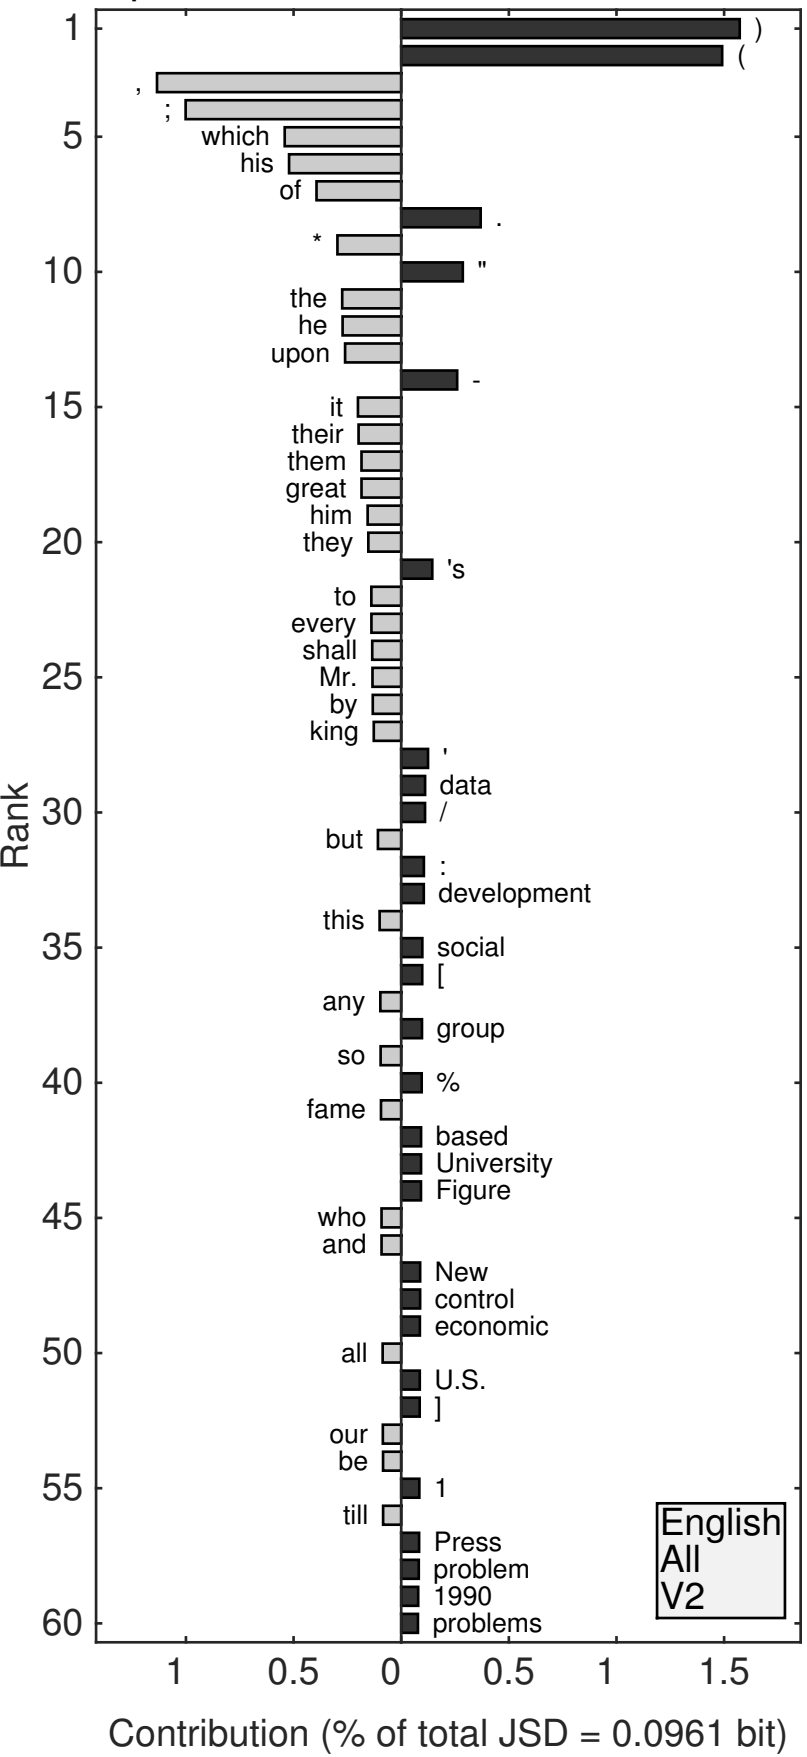

# Top JSD contributions: 1810s to 1820s

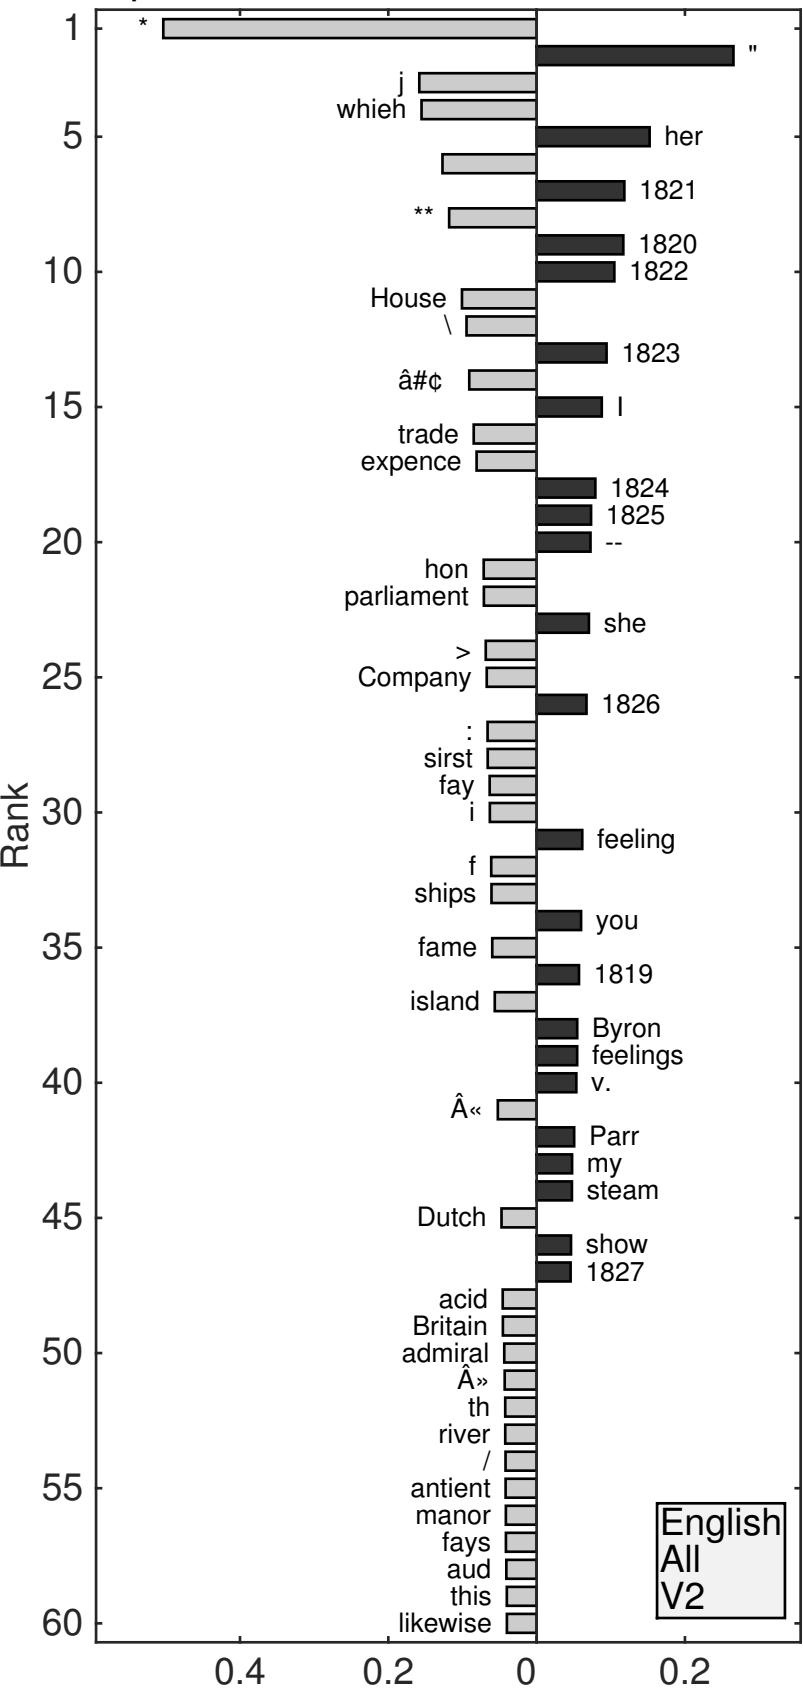

Contribution (% of total JSD = 0.00349 bit)

# Top JSD contributions: 1810s to 1830s

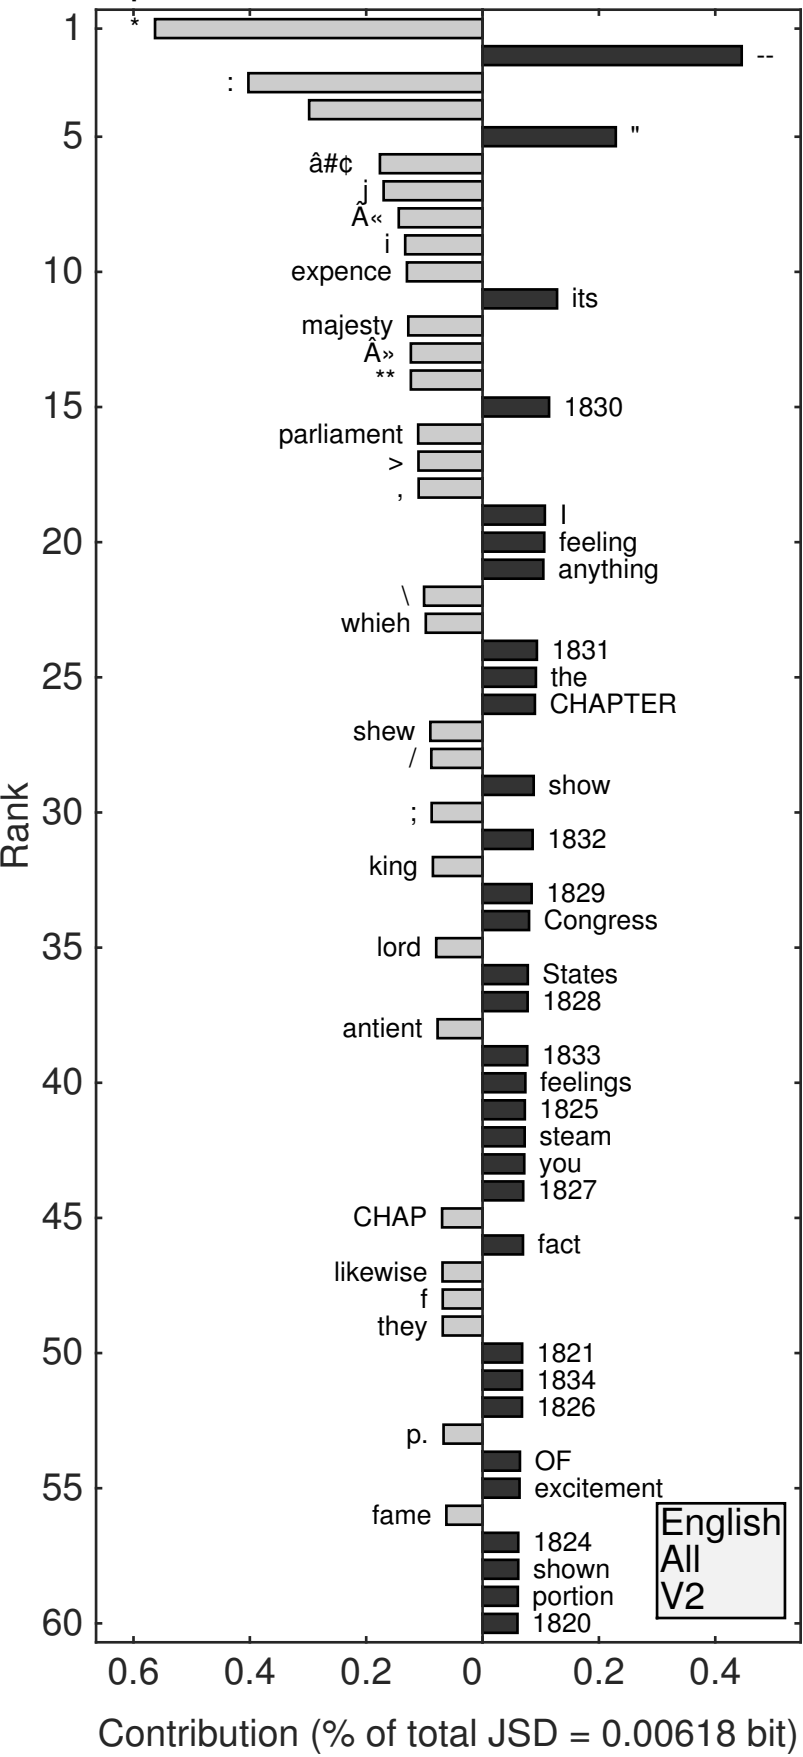

# Top JSD contributions: 1810s to 1840s

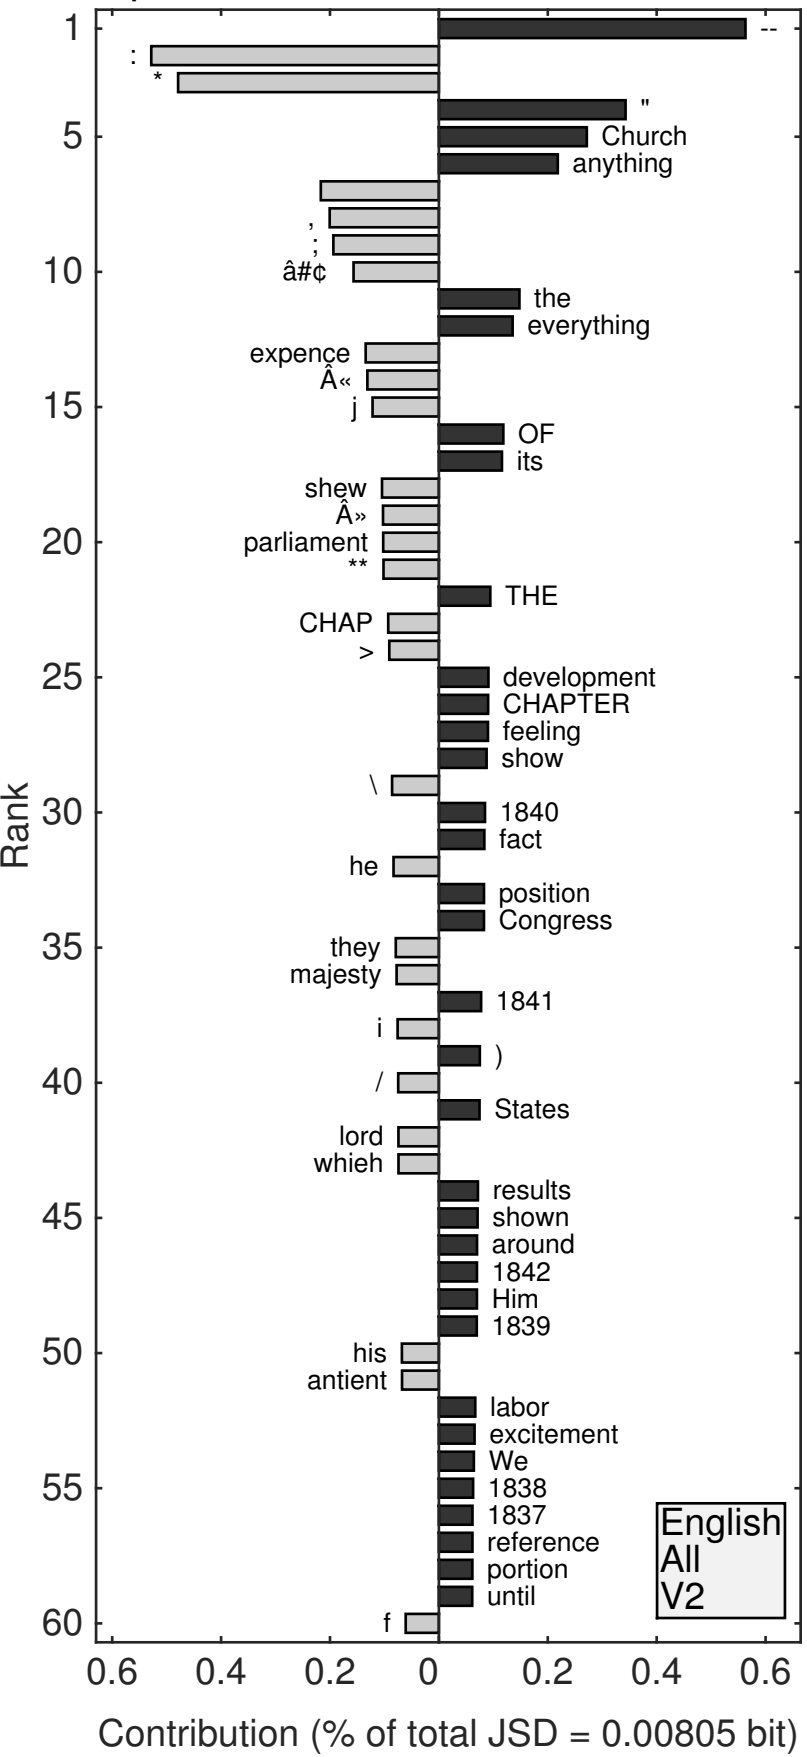

# Top JSD contributions: 1810s to 1850s

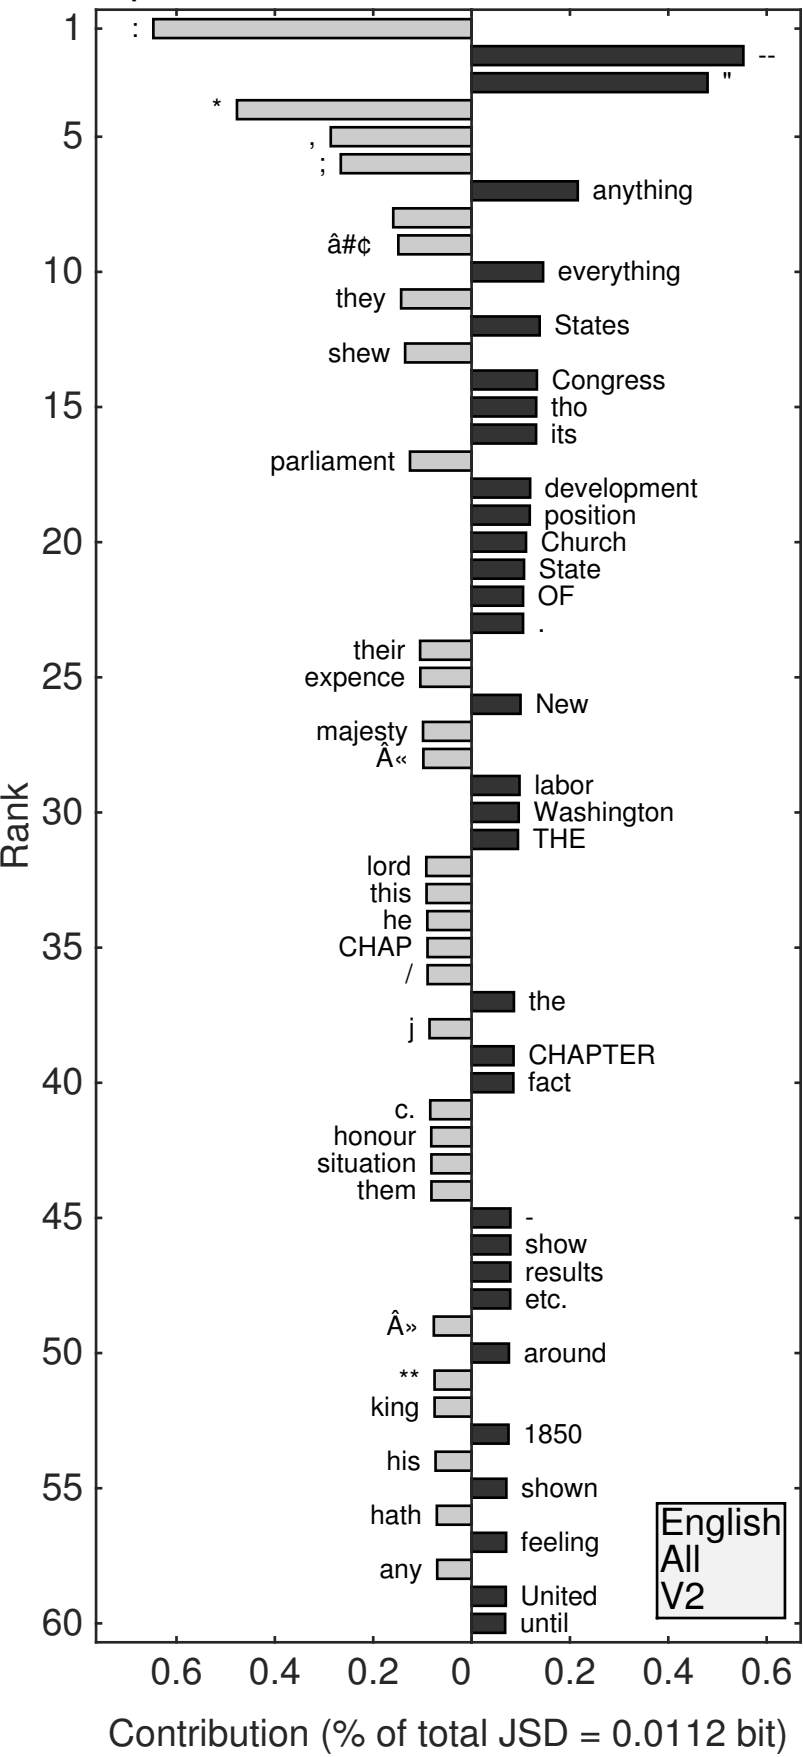

# Top JSD contributions: 1810s to 1860s

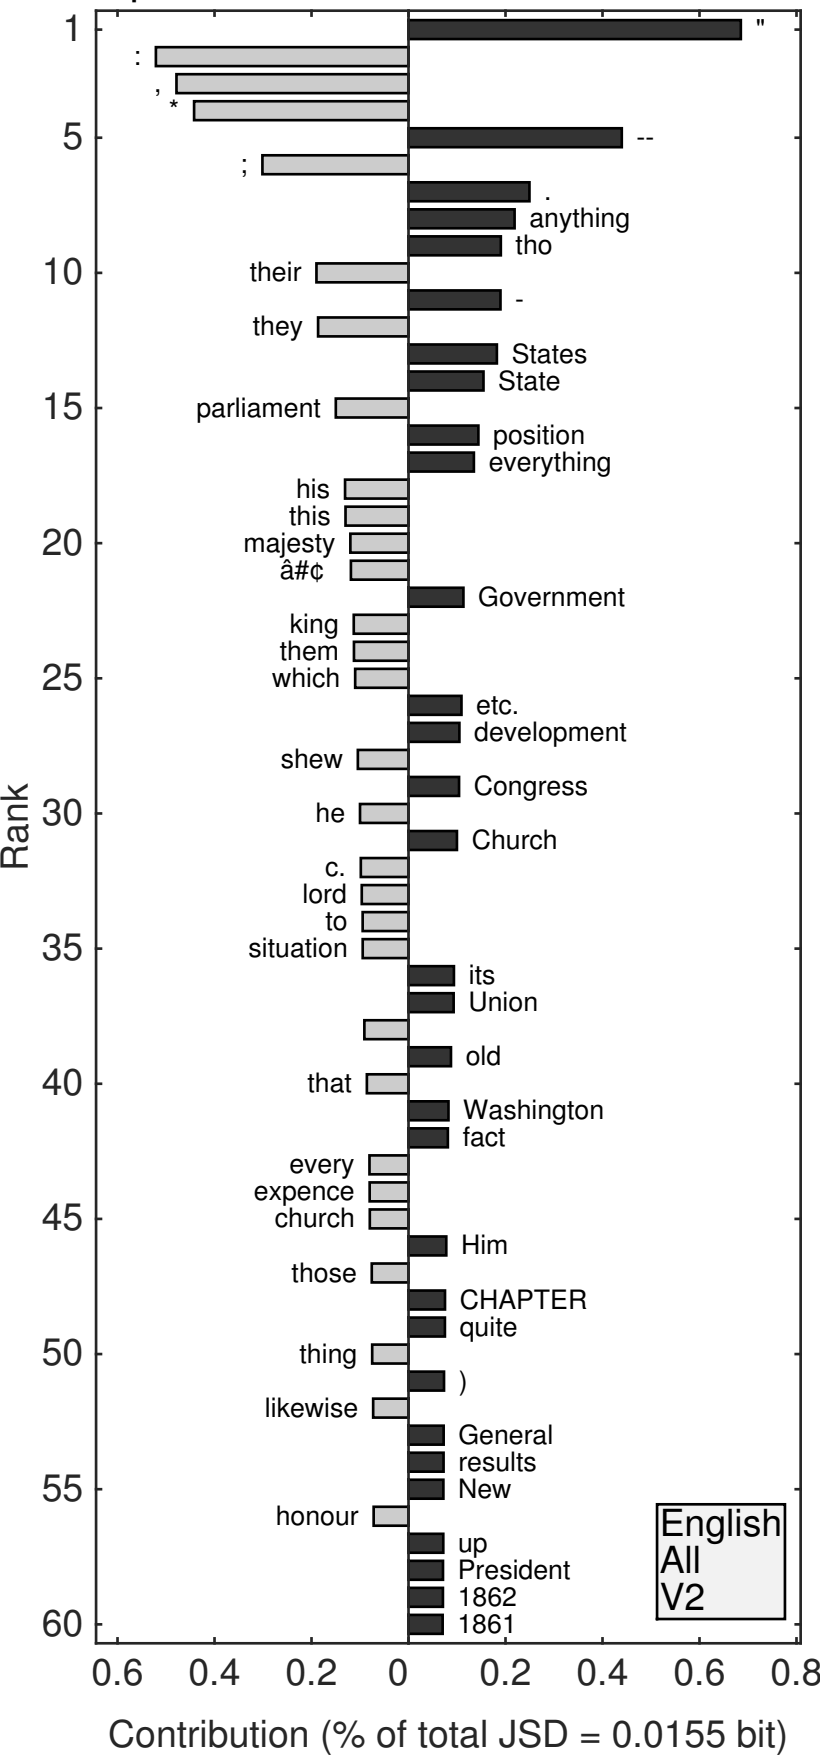



# Top JSD contributions: 1810s to 1870s

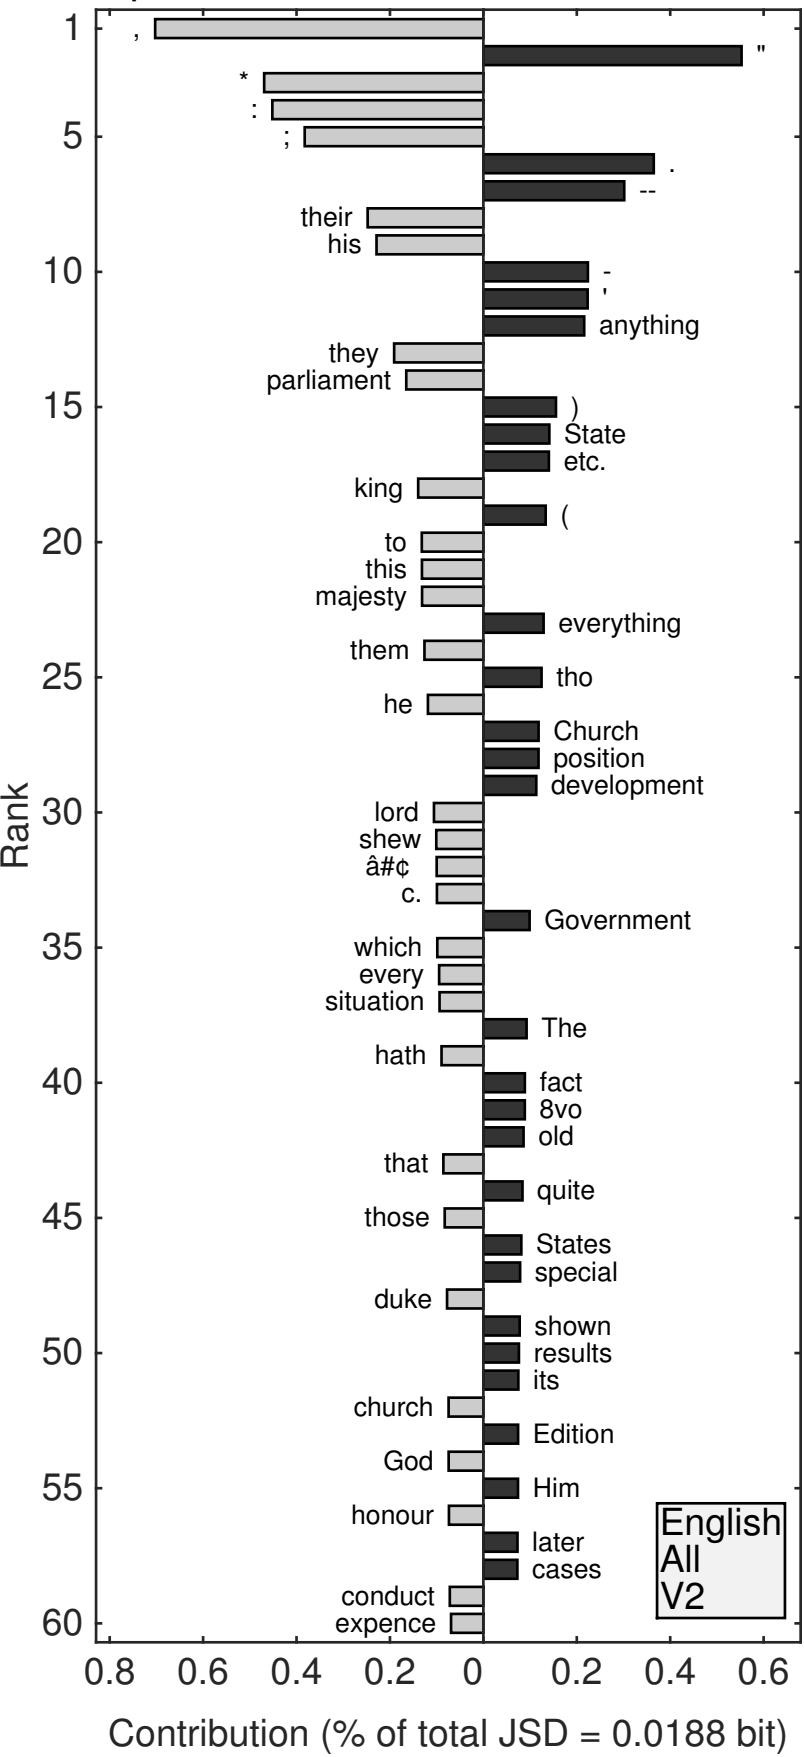

# Top JSD contributions: 1810s to 1880s

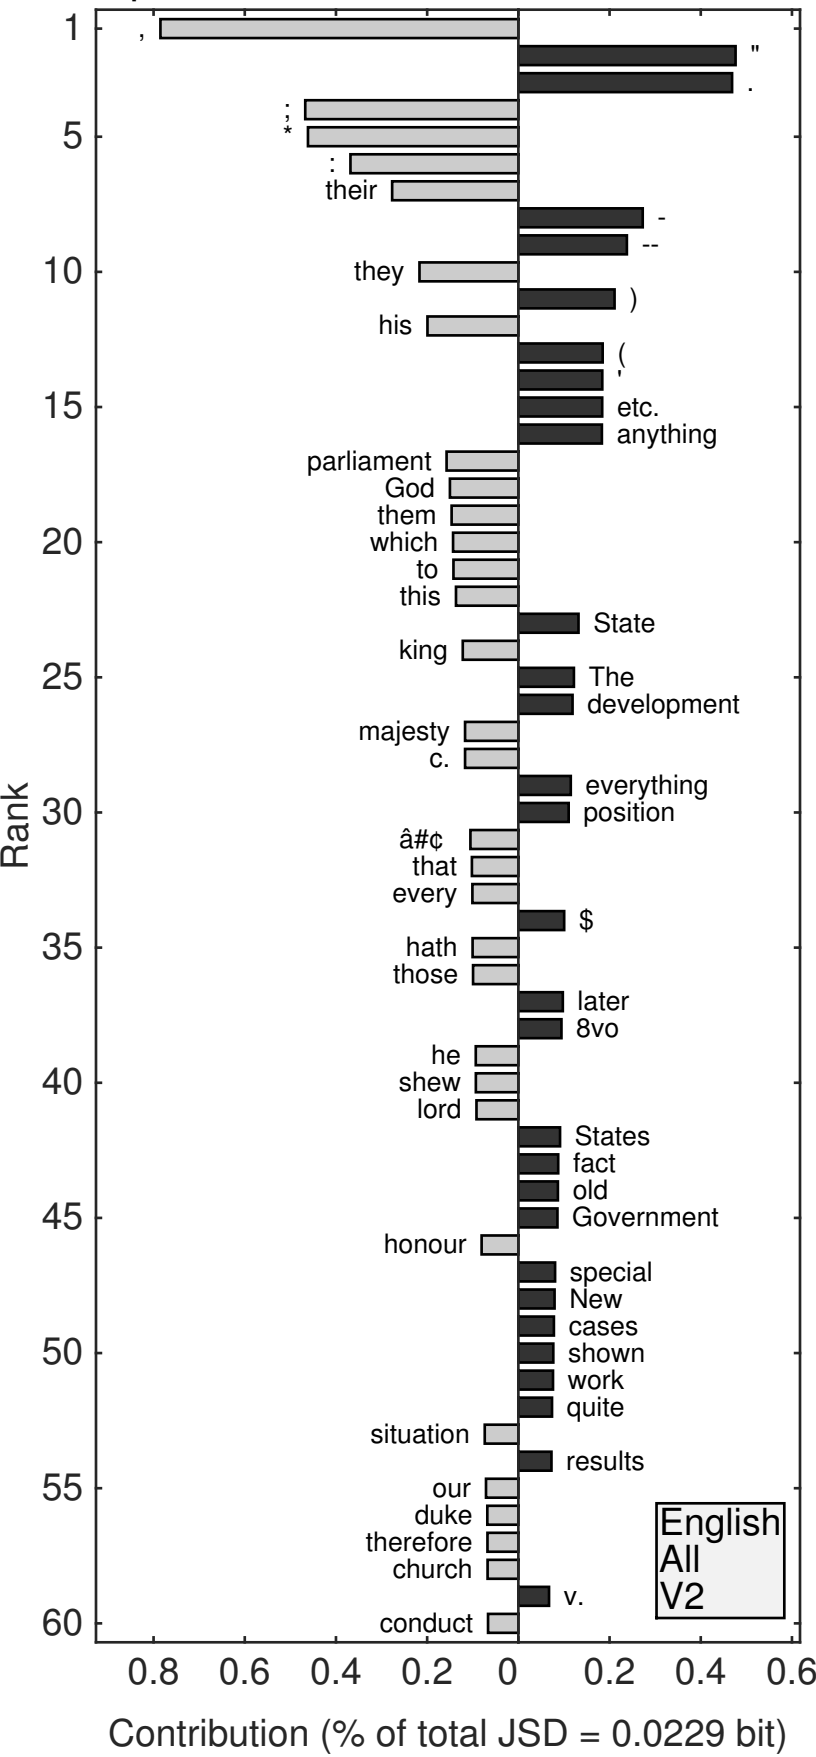

# Top JSD contributions: 1810s to 1890s

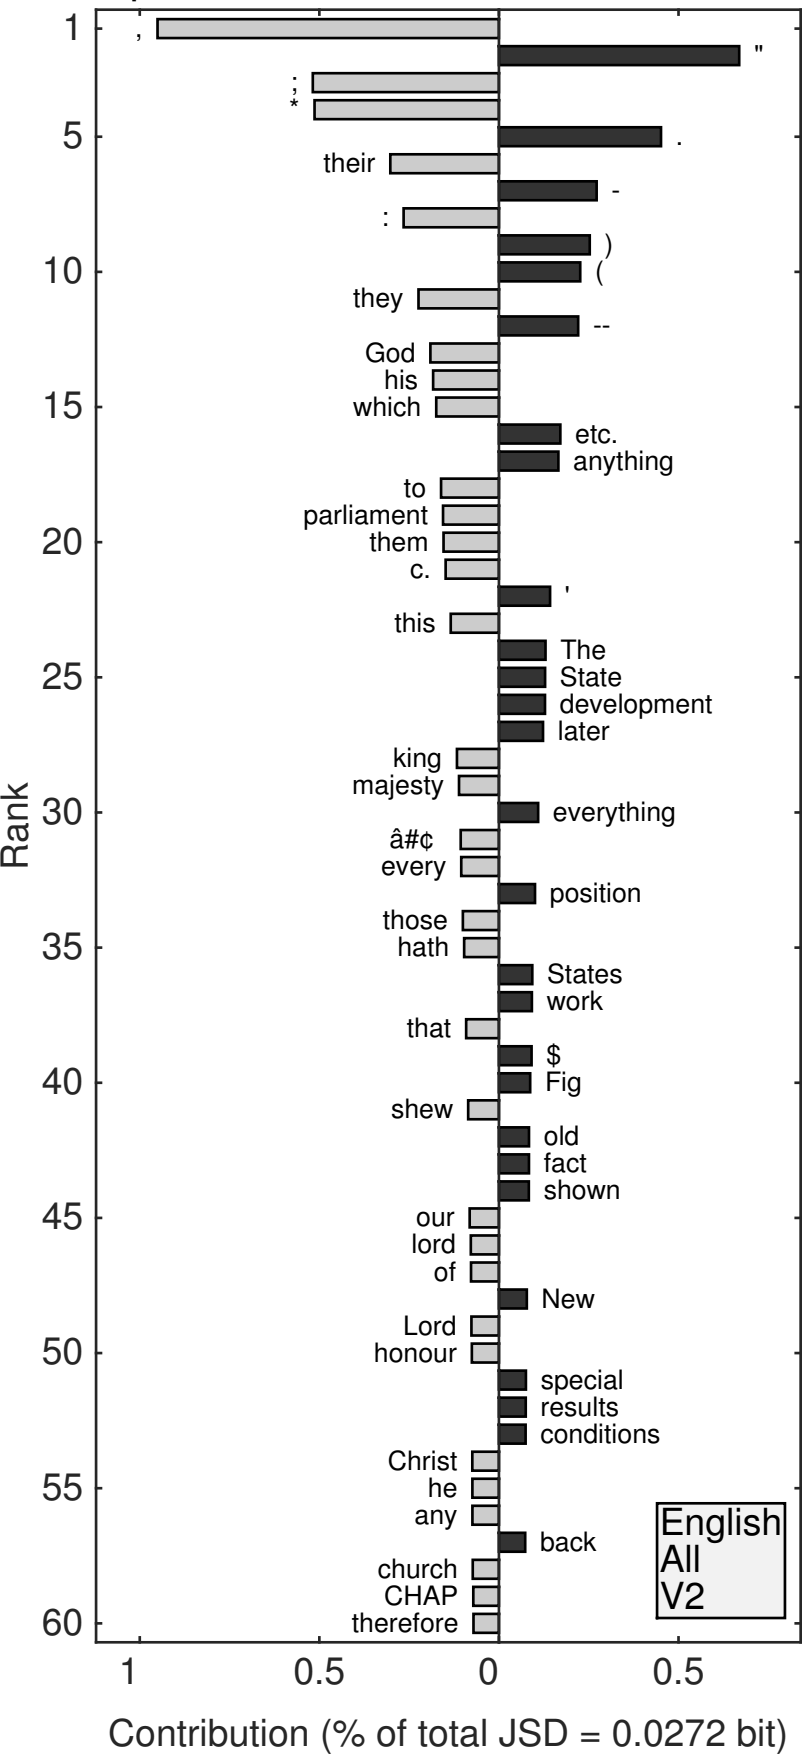

# Top JSD contributions: 1810s to 1900s

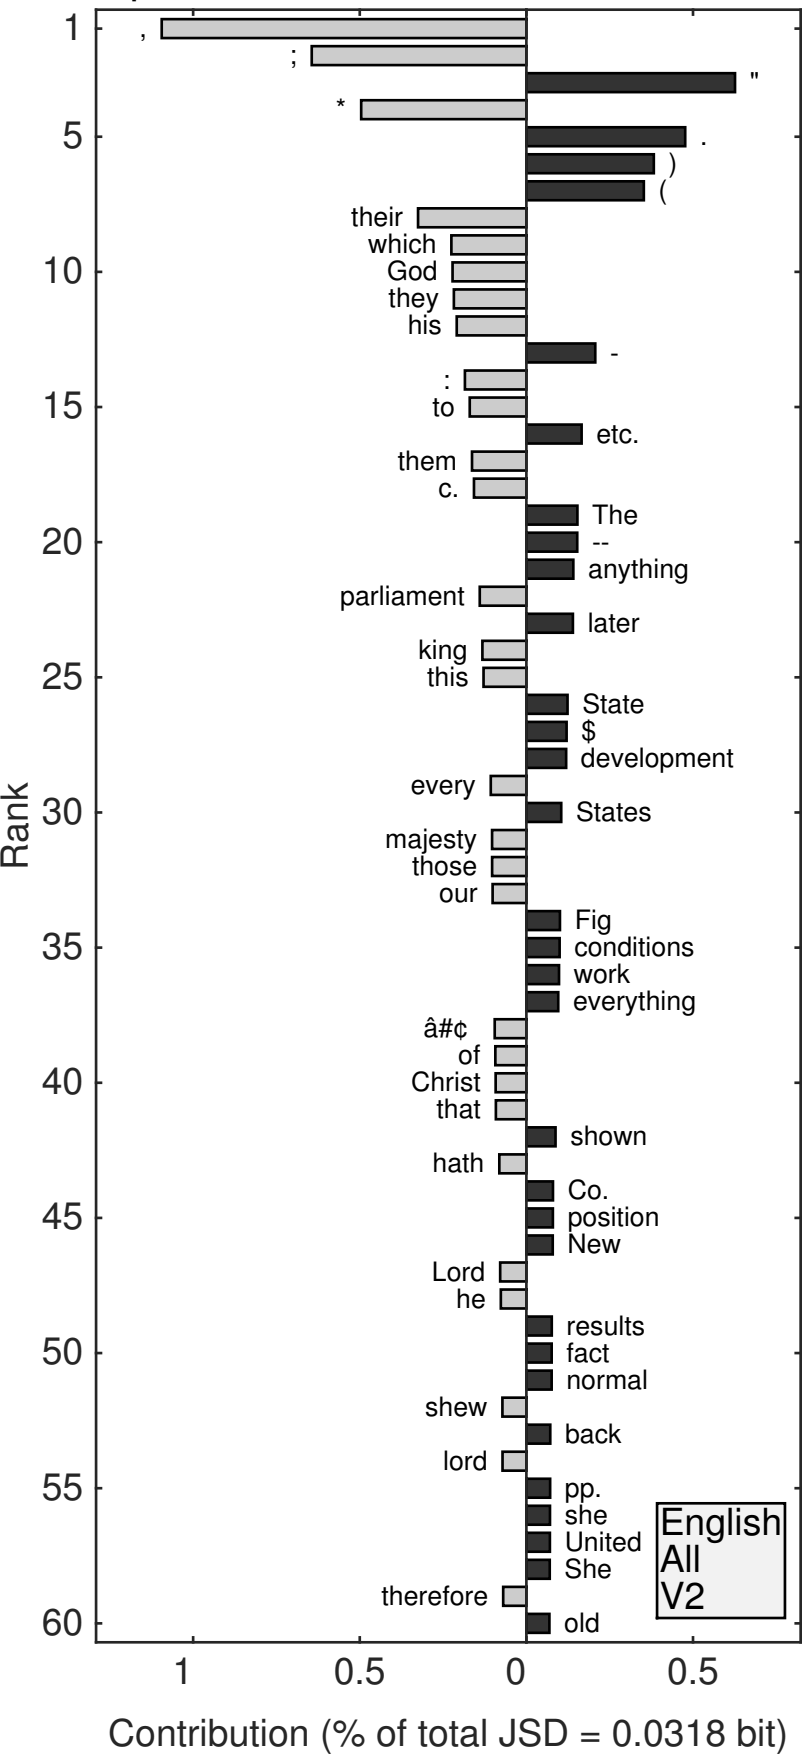

# Top JSD contributions: 1810s to 1910s

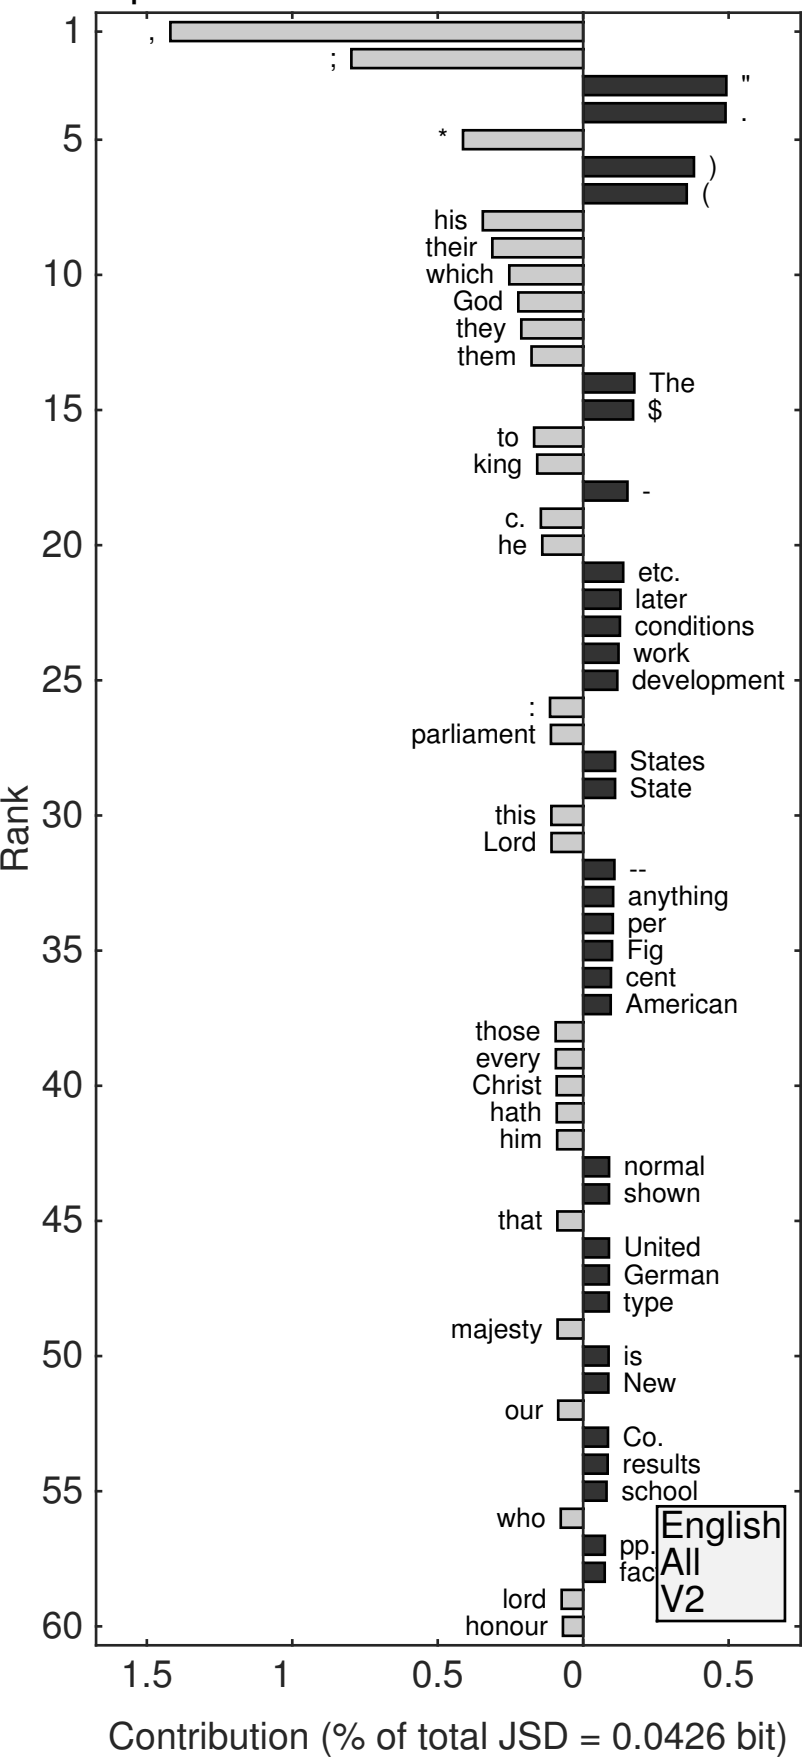

# Top JSD contributions: 1810s to 1920s

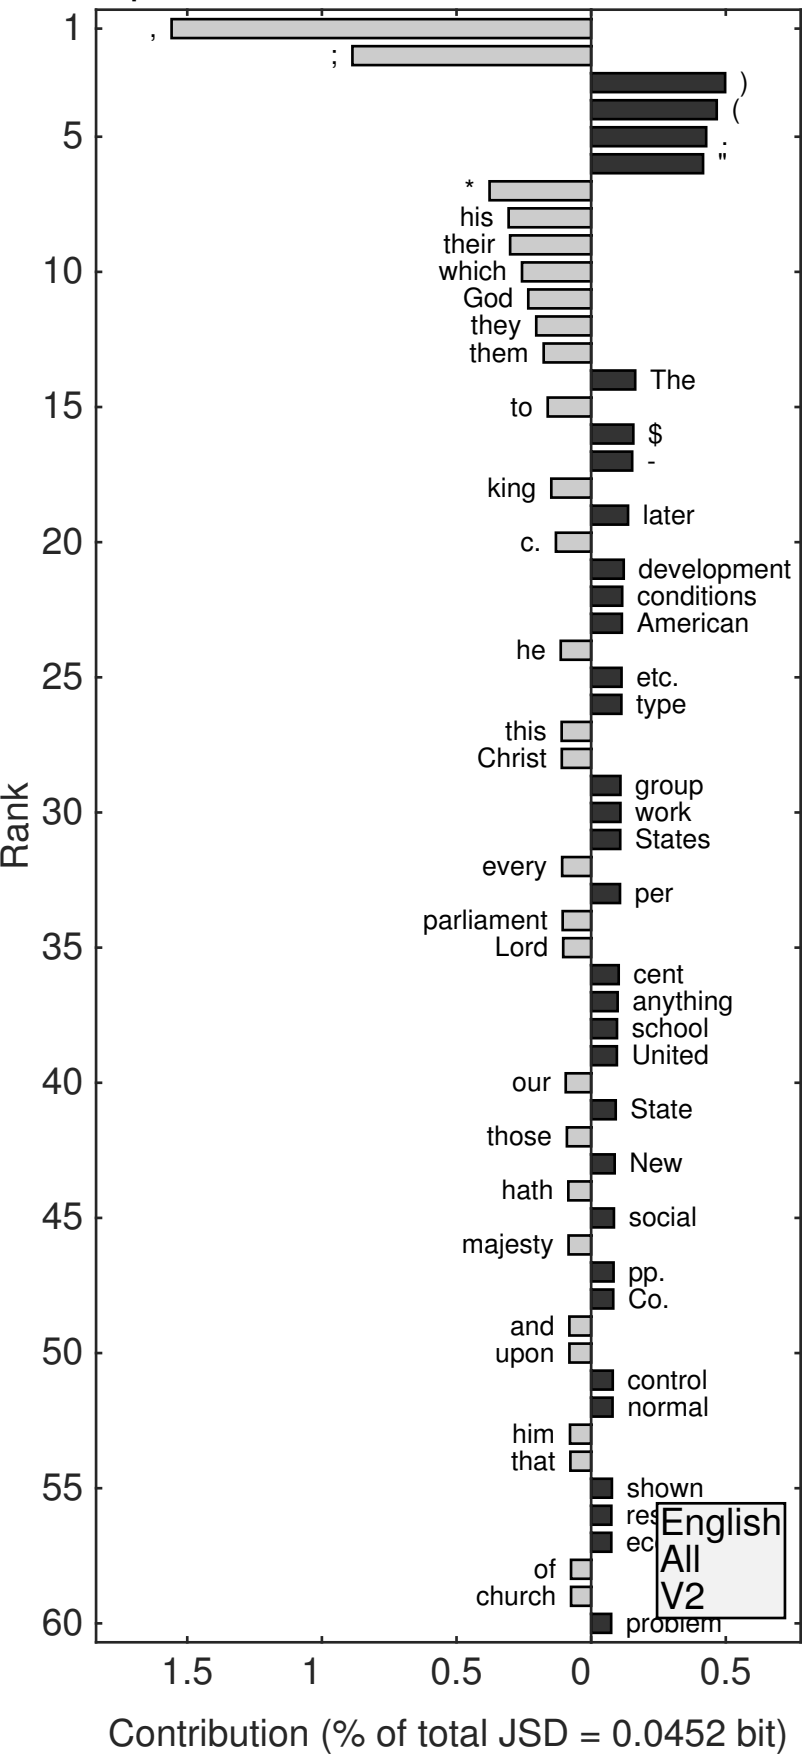

Contribution (% of total JSD = 0.0452 bit)

# Top JSD contributions: 1810s to 1930s

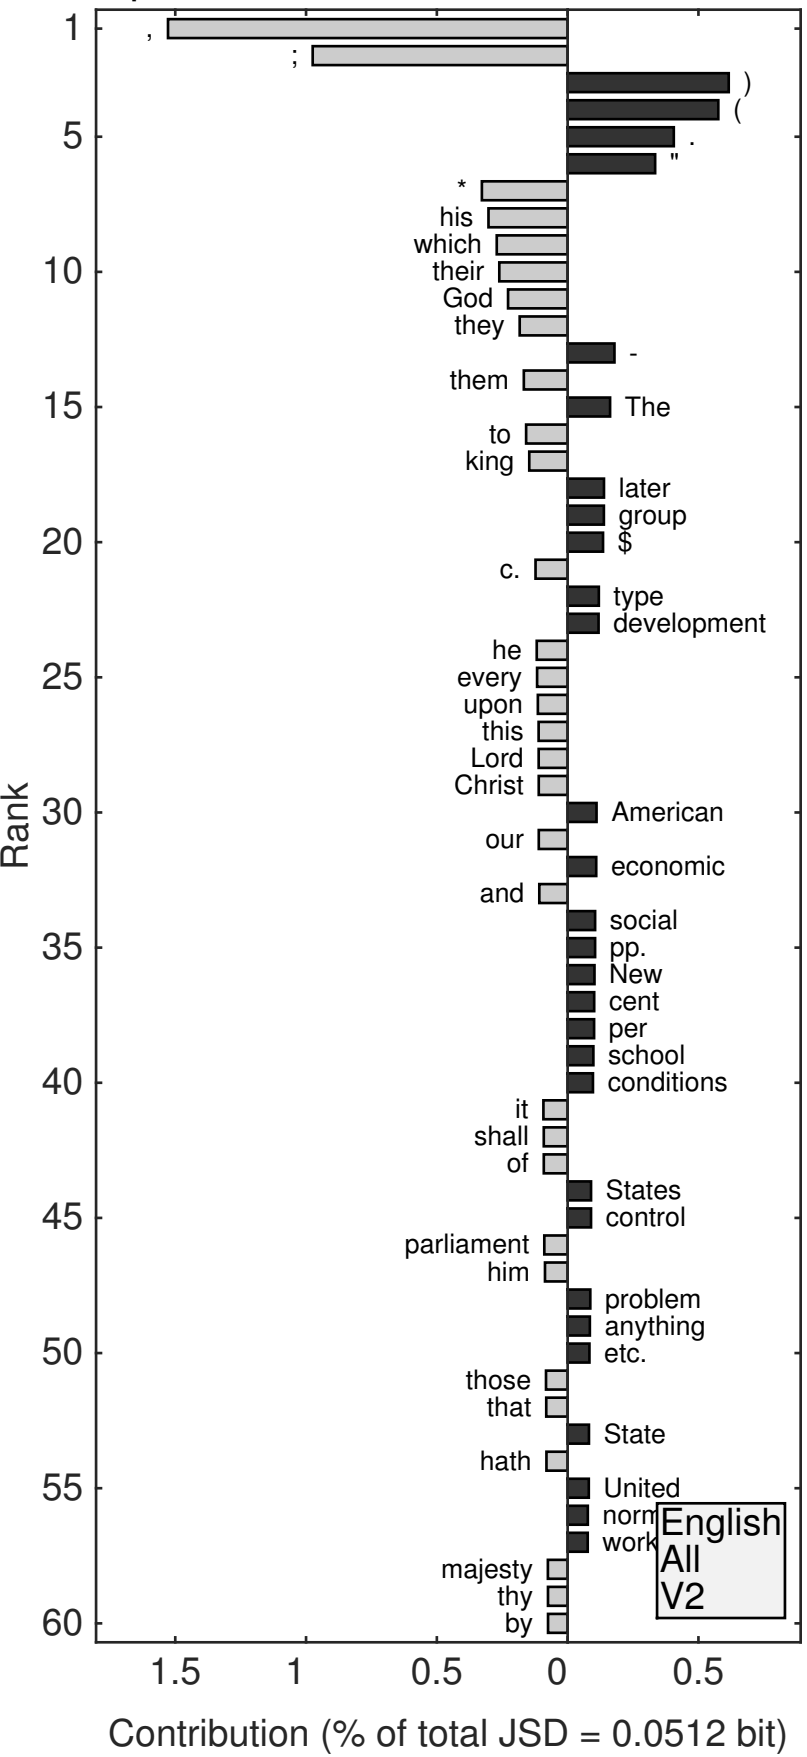

# Top JSD contributions: 1810s to 1940s

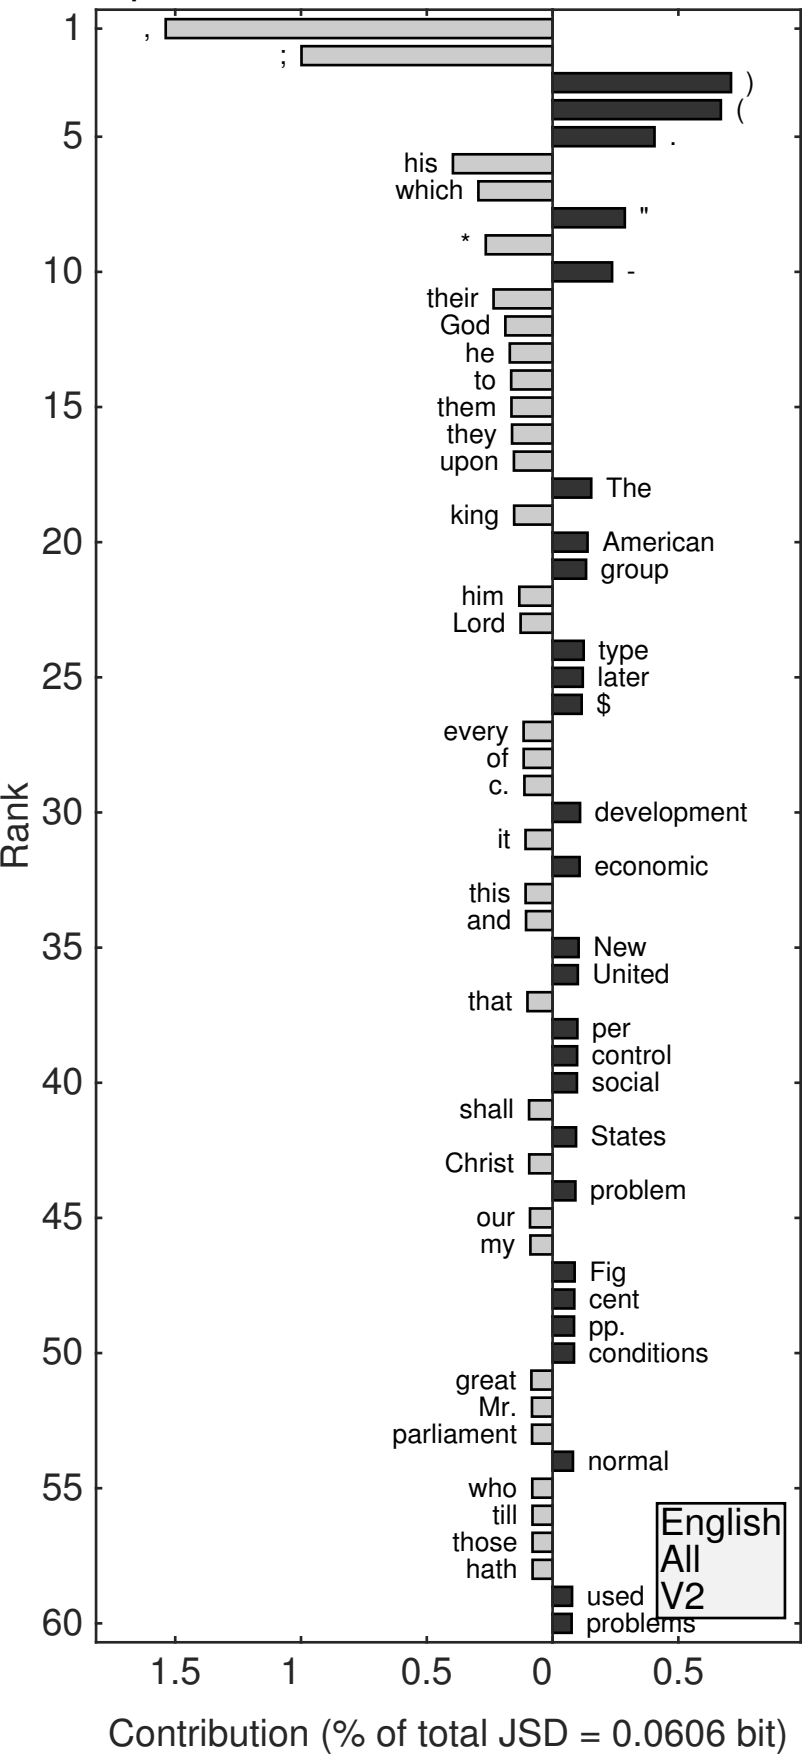



# Top JSD contributions: 1810s to 1950s

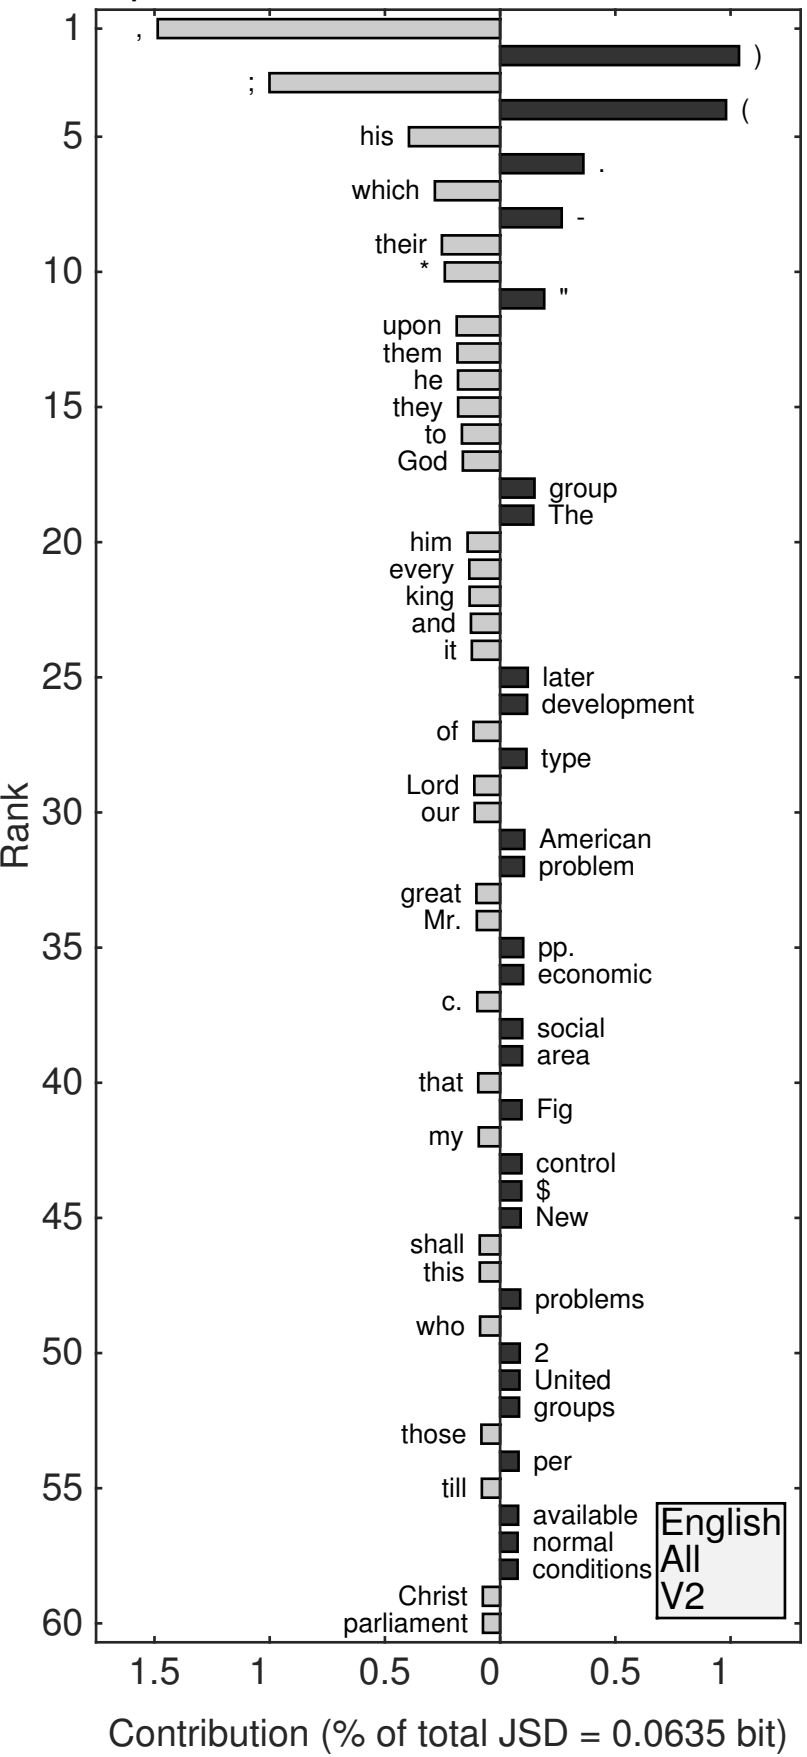

# Top JSD contributions: 1810s to 1960s

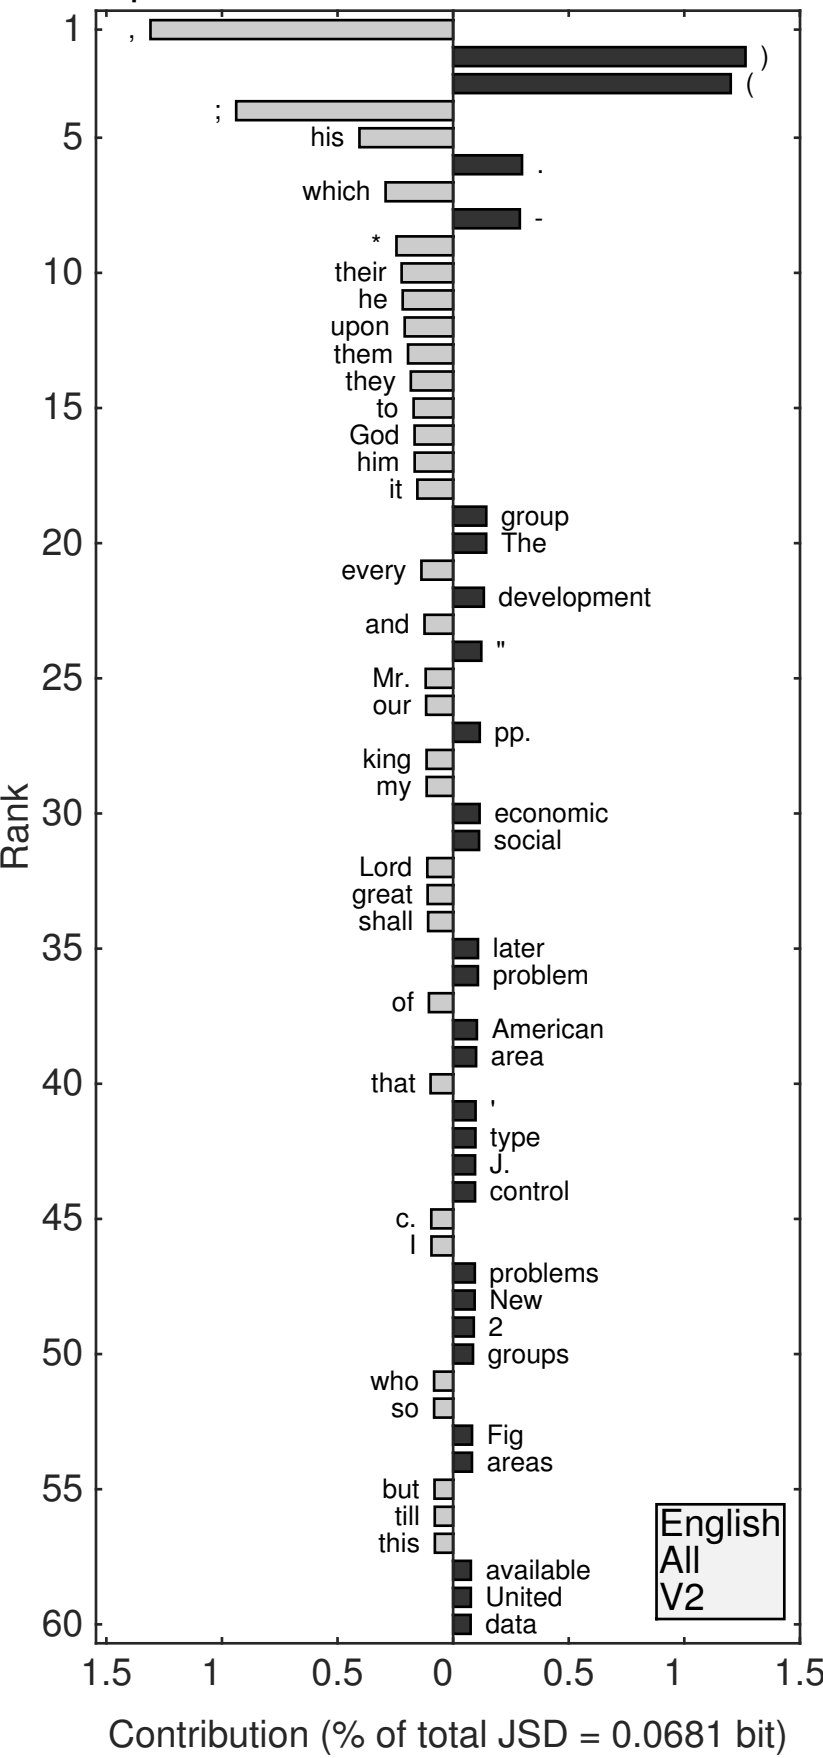

# Top JSD contributions: 1810s to 1970s

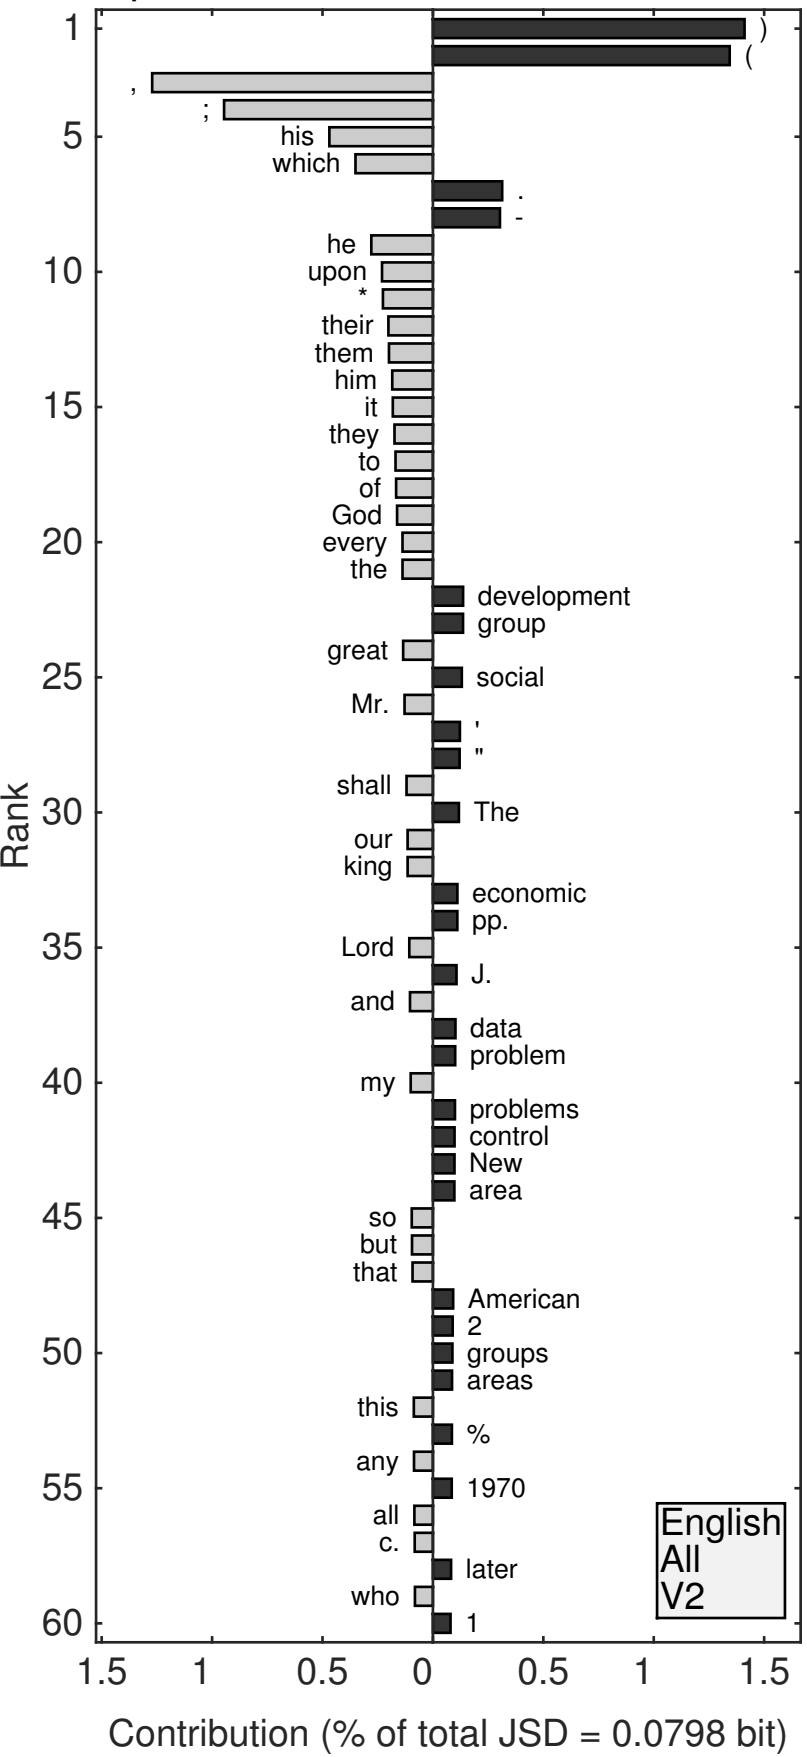

# Top JSD contributions: 1810s to 1980s

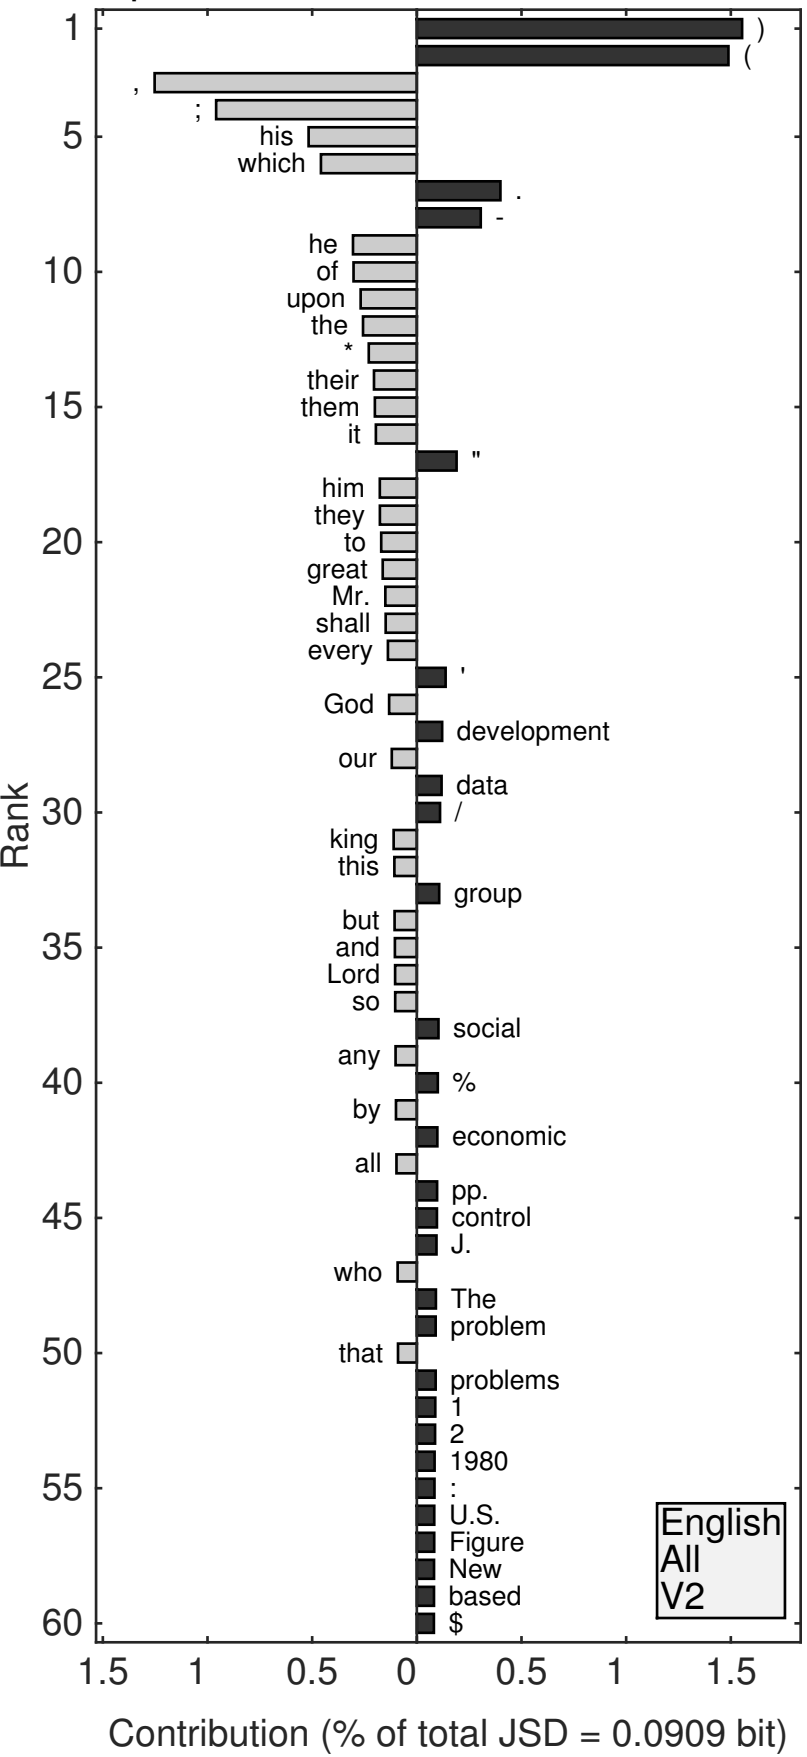

# Top JSD contributions: 1810s to 1990s

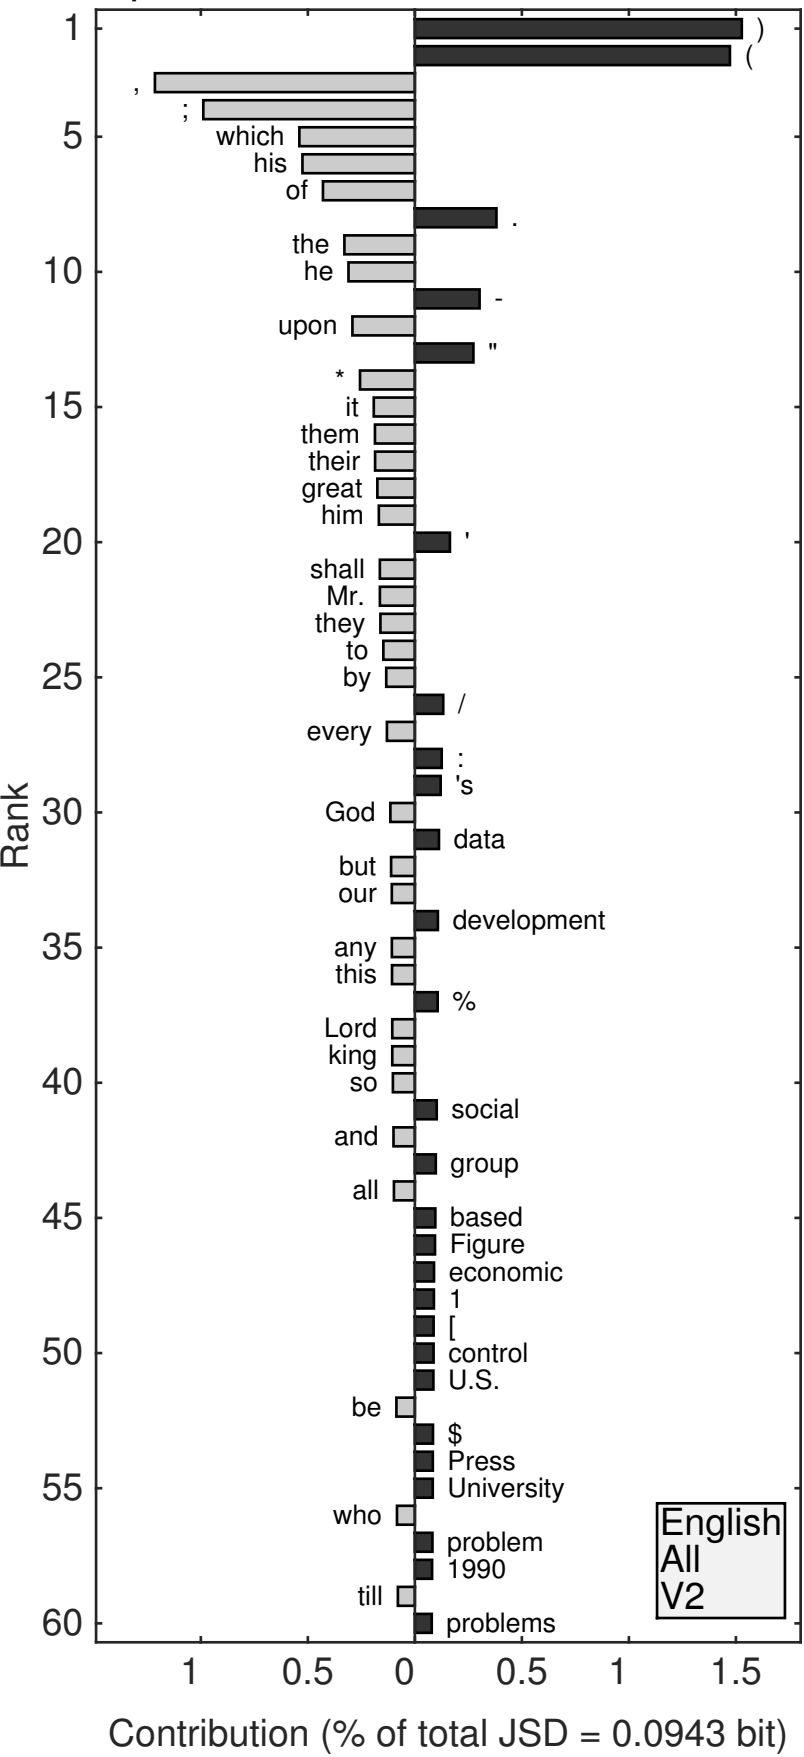

# Top JSD contributions: 1820s to 1830s

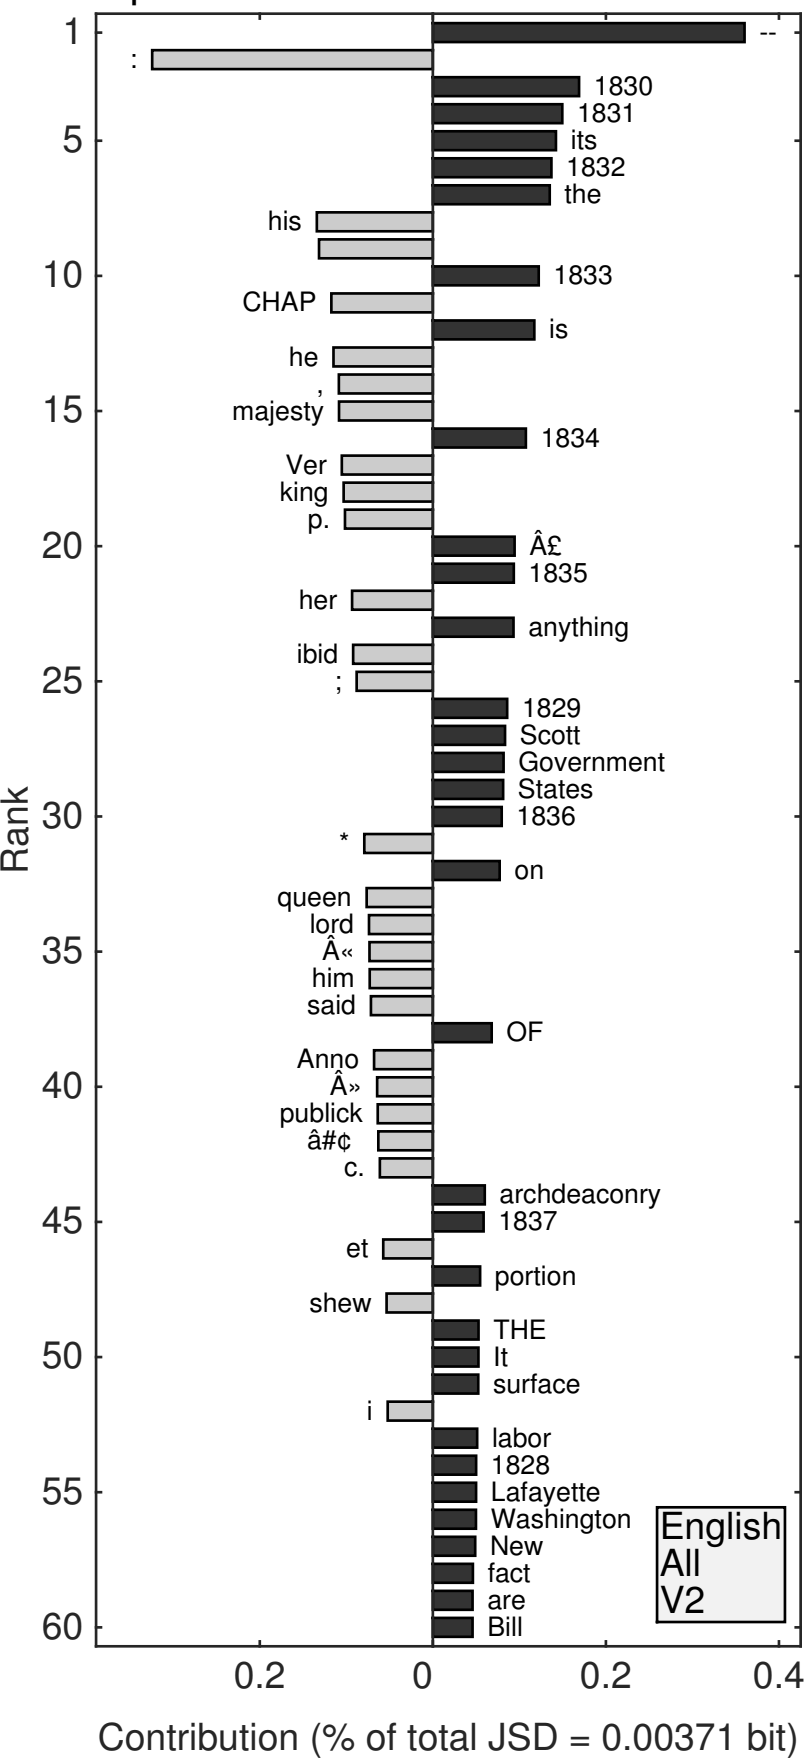

# Top JSD contributions: 1820s to 1840s

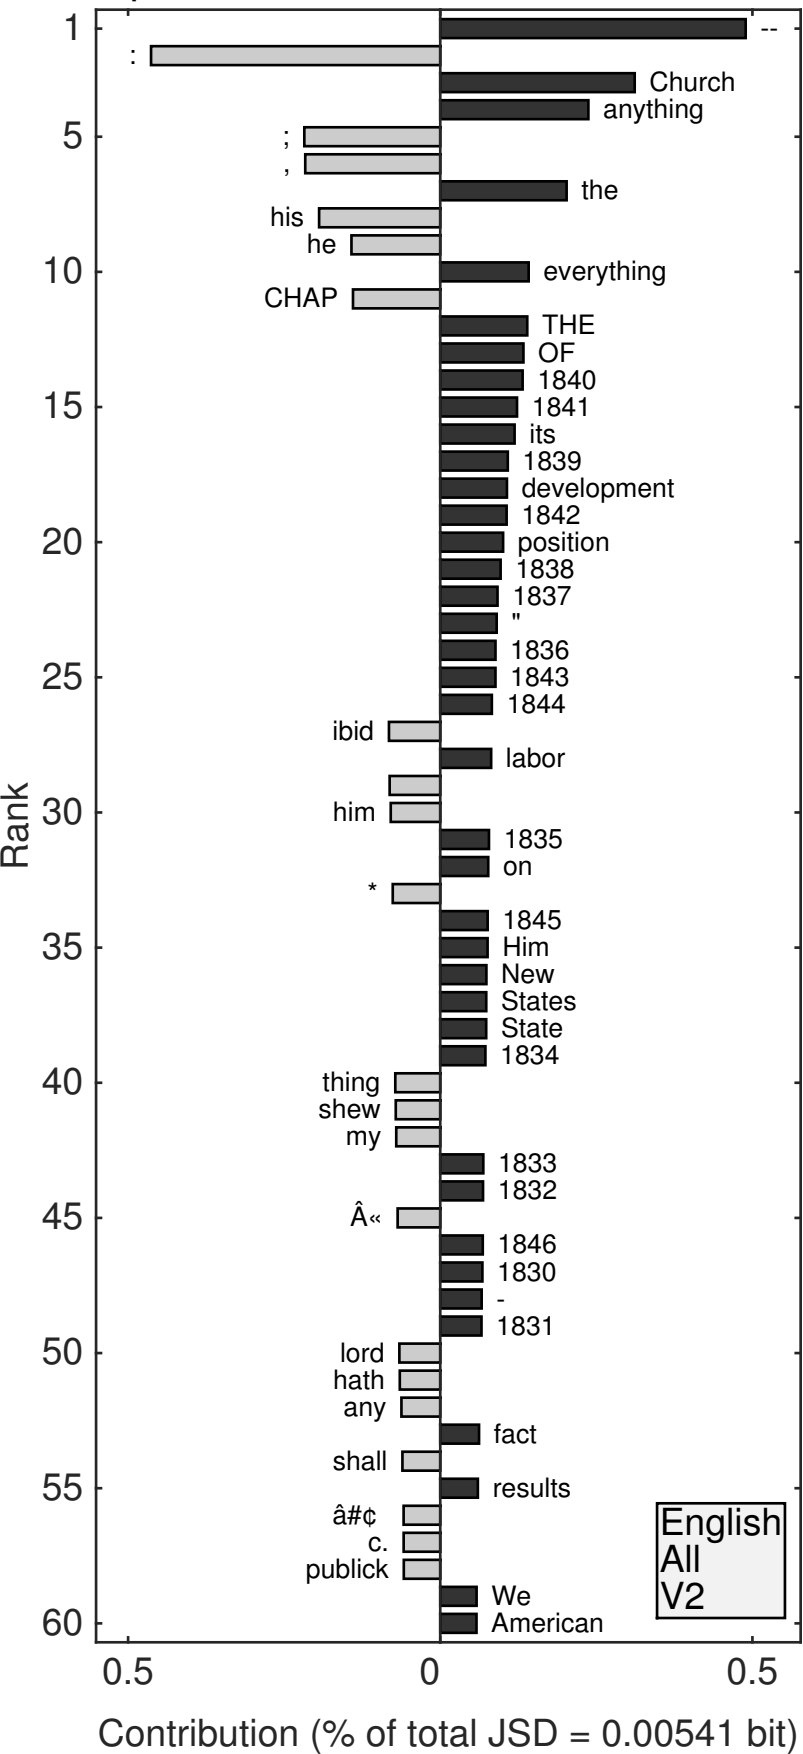

# Top JSD contributions: 1820s to 1850s

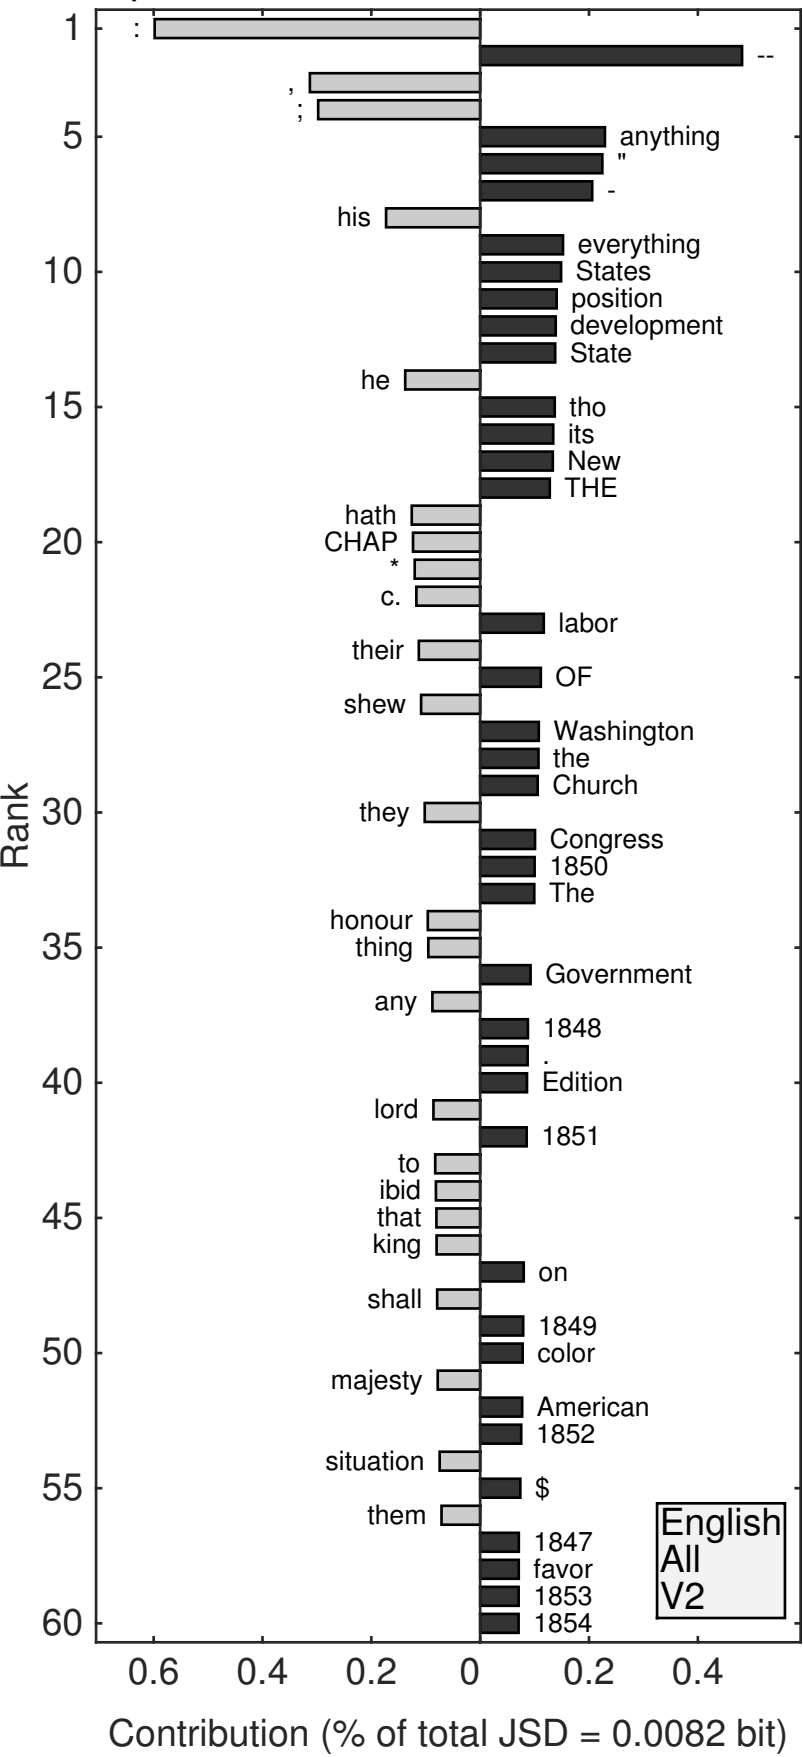

English  
All  
V2

Contribution (% of total JSD = 0.0082 bit)



# Top JSD contributions: 1820s to 1860s

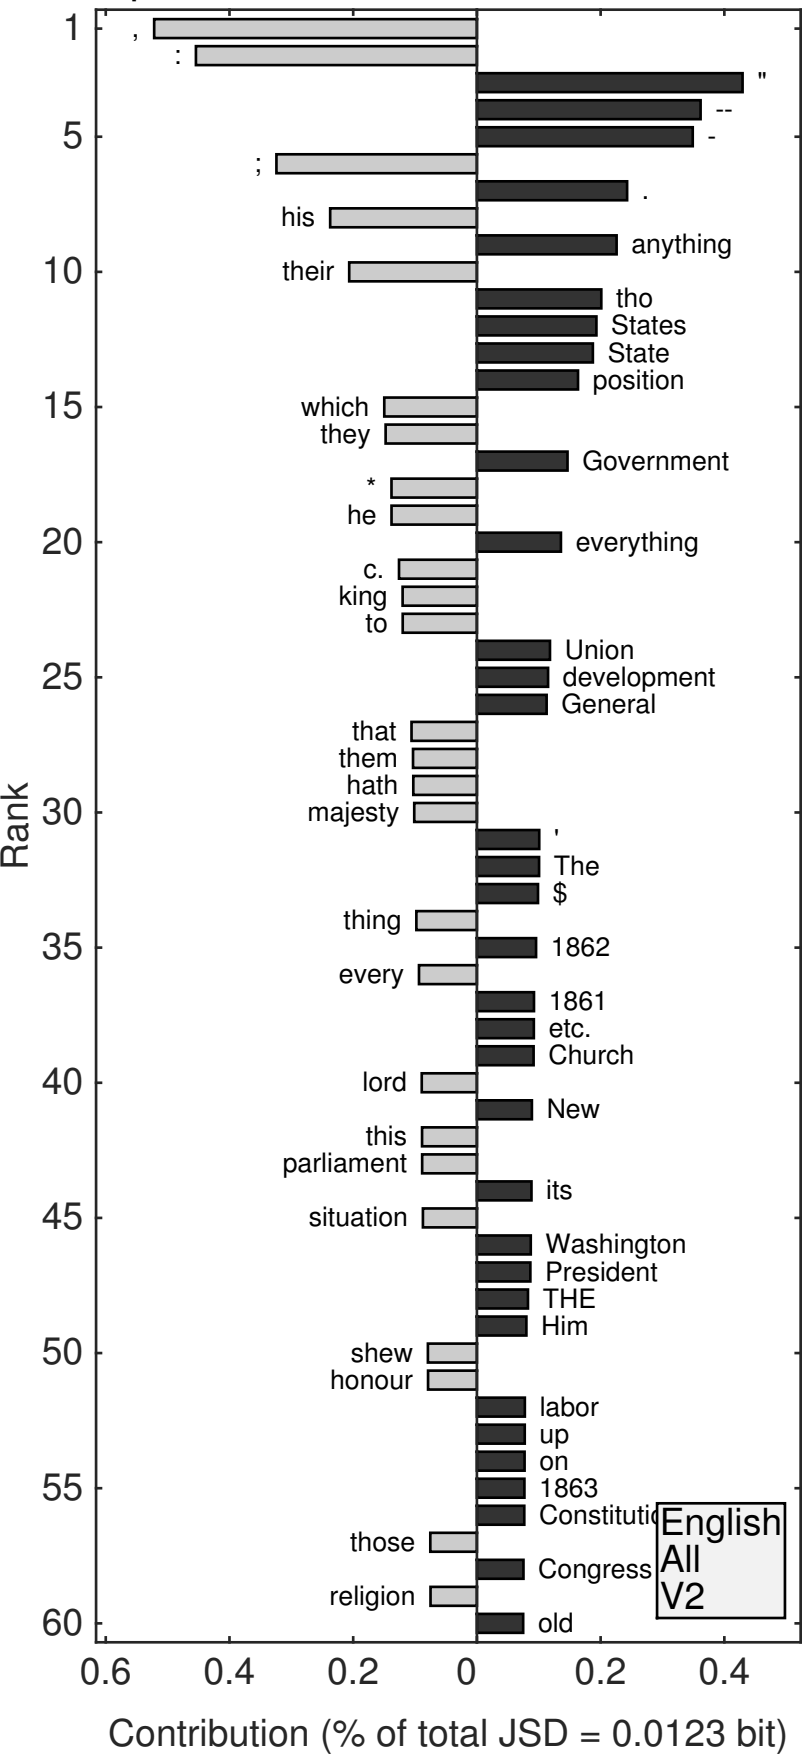

# Top JSD contributions: 1820s to 1870s

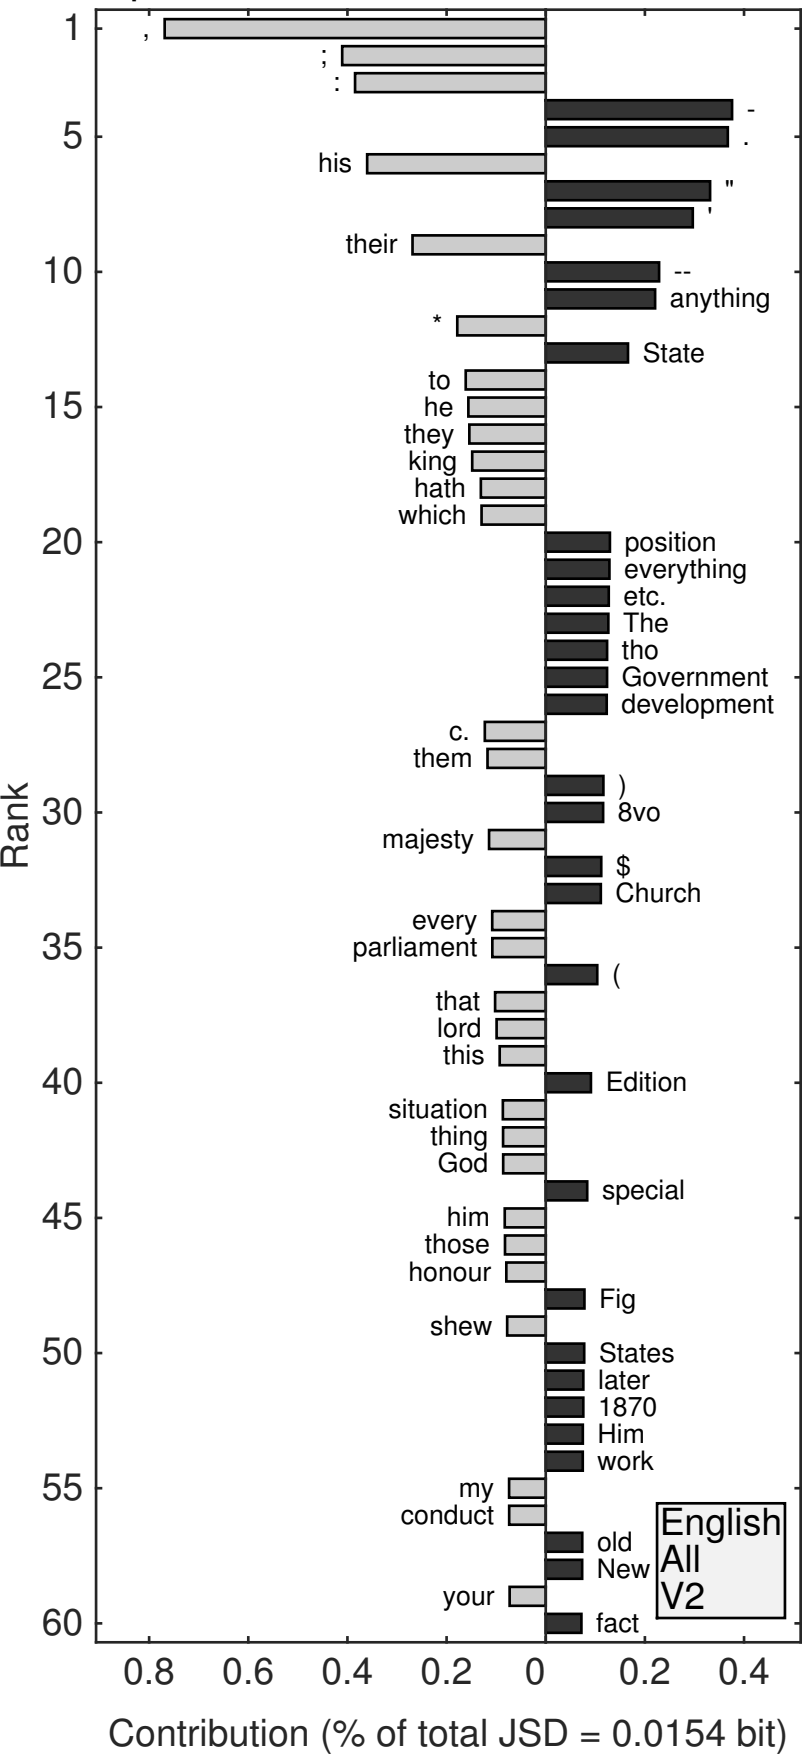

# Top JSD contributions: 1820s to 1880s

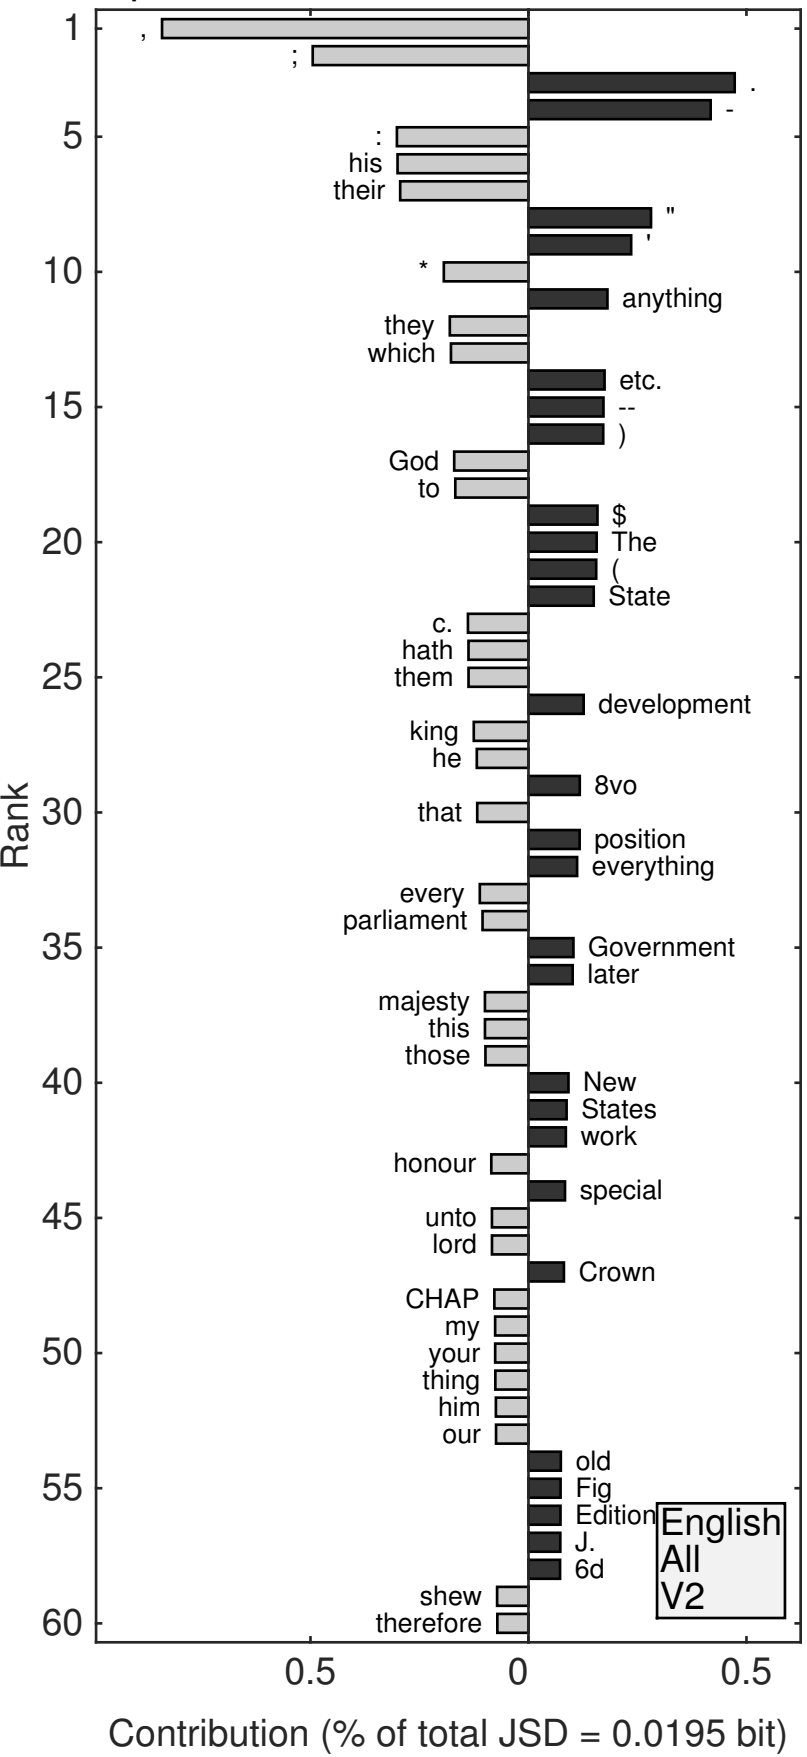

# Top JSD contributions: 1820s to 1890s

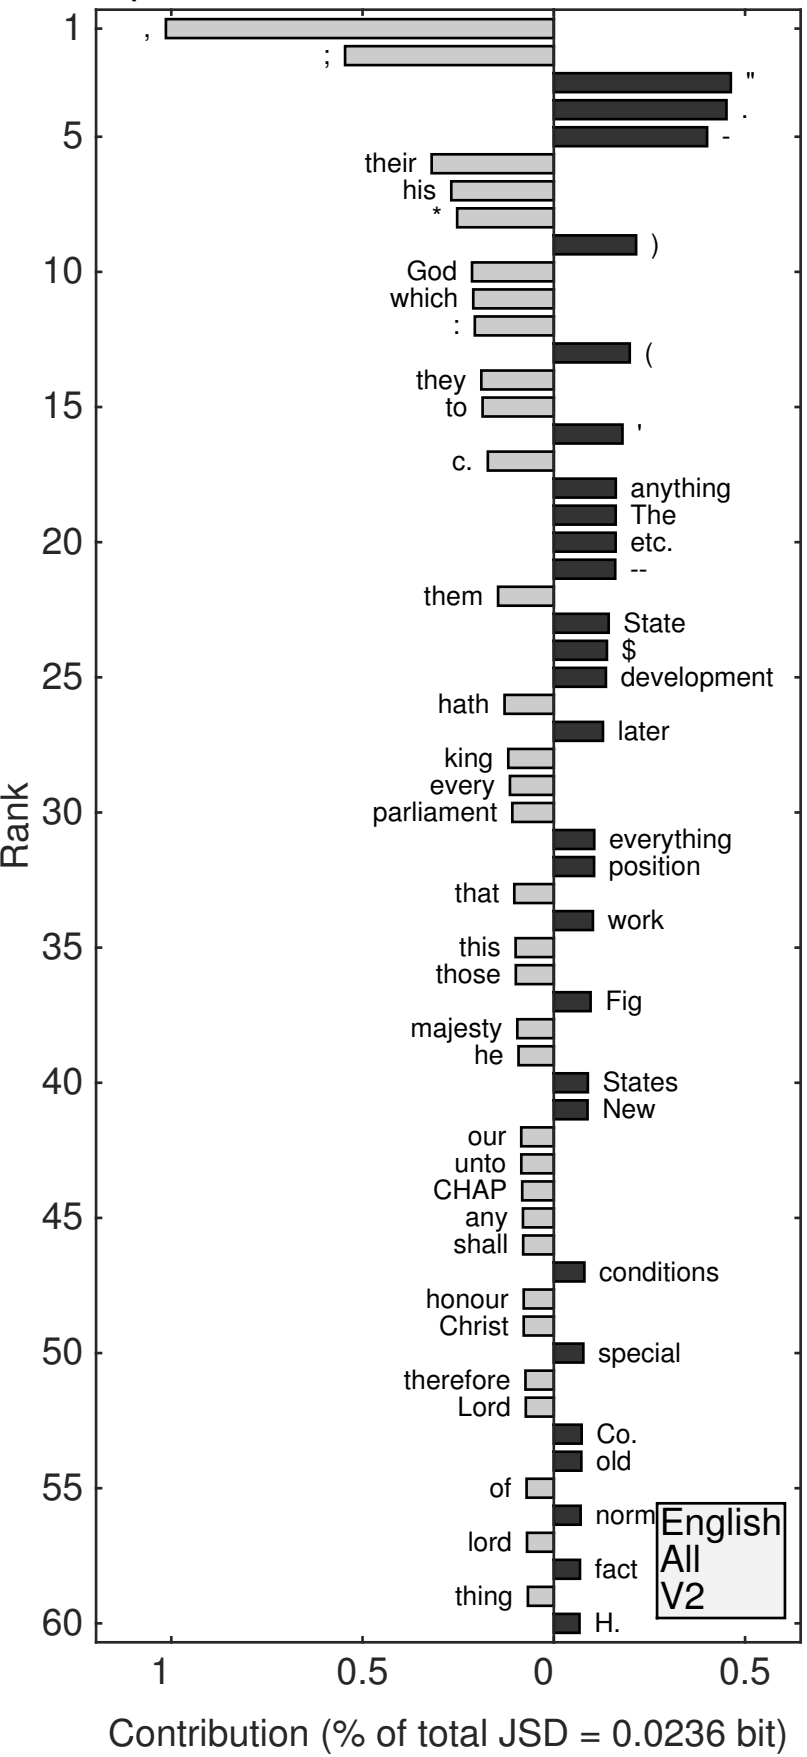

# Top JSD contributions: 1820s to 1900s

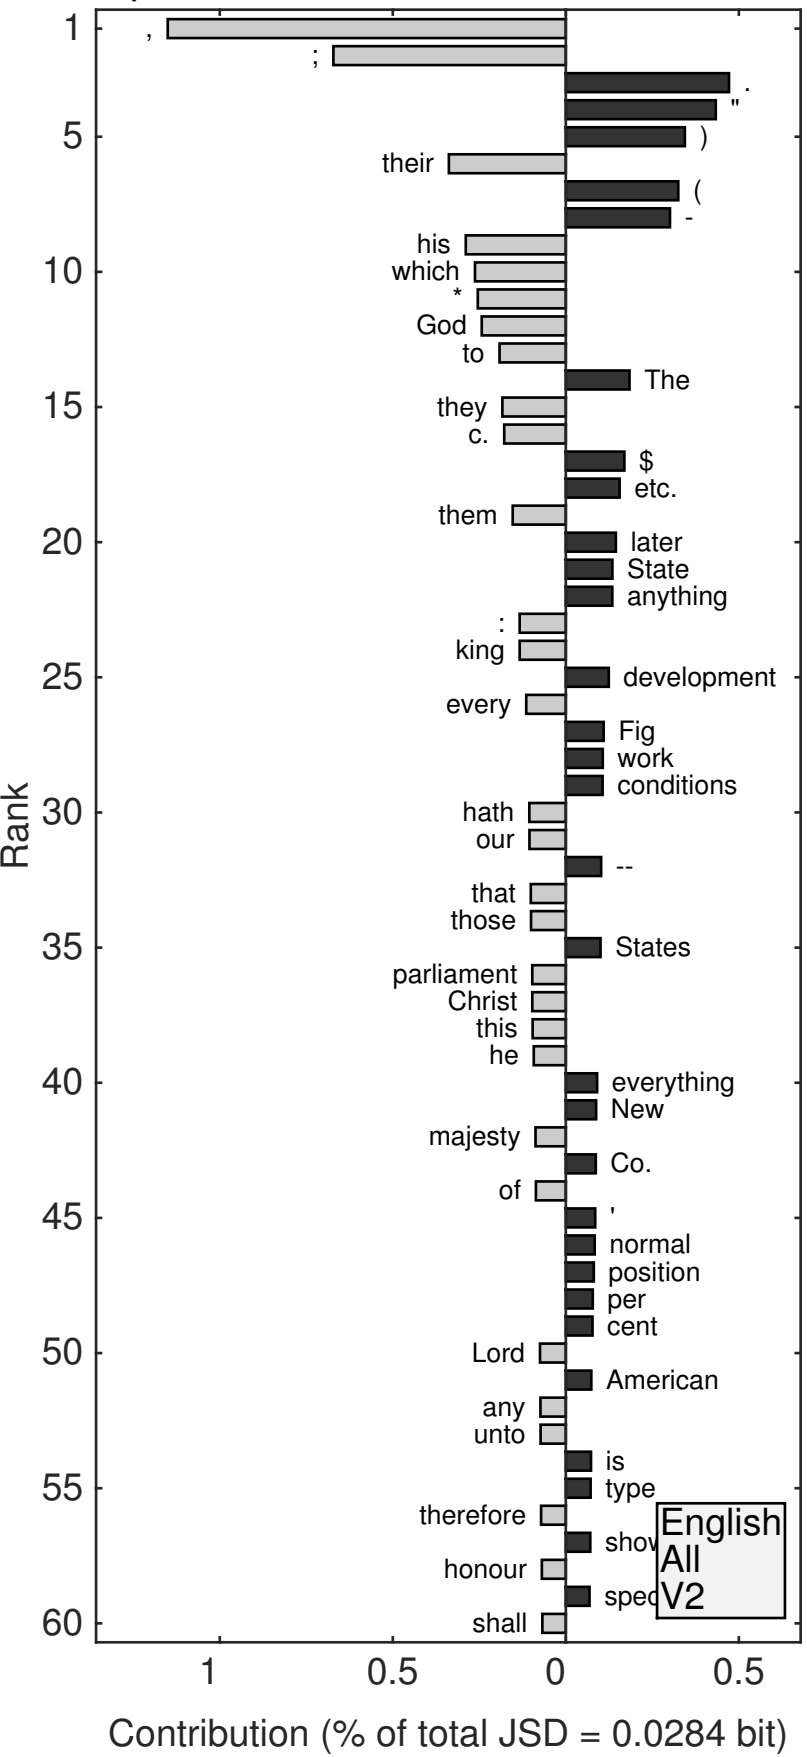

# Top JSD contributions: 1820s to 1910s

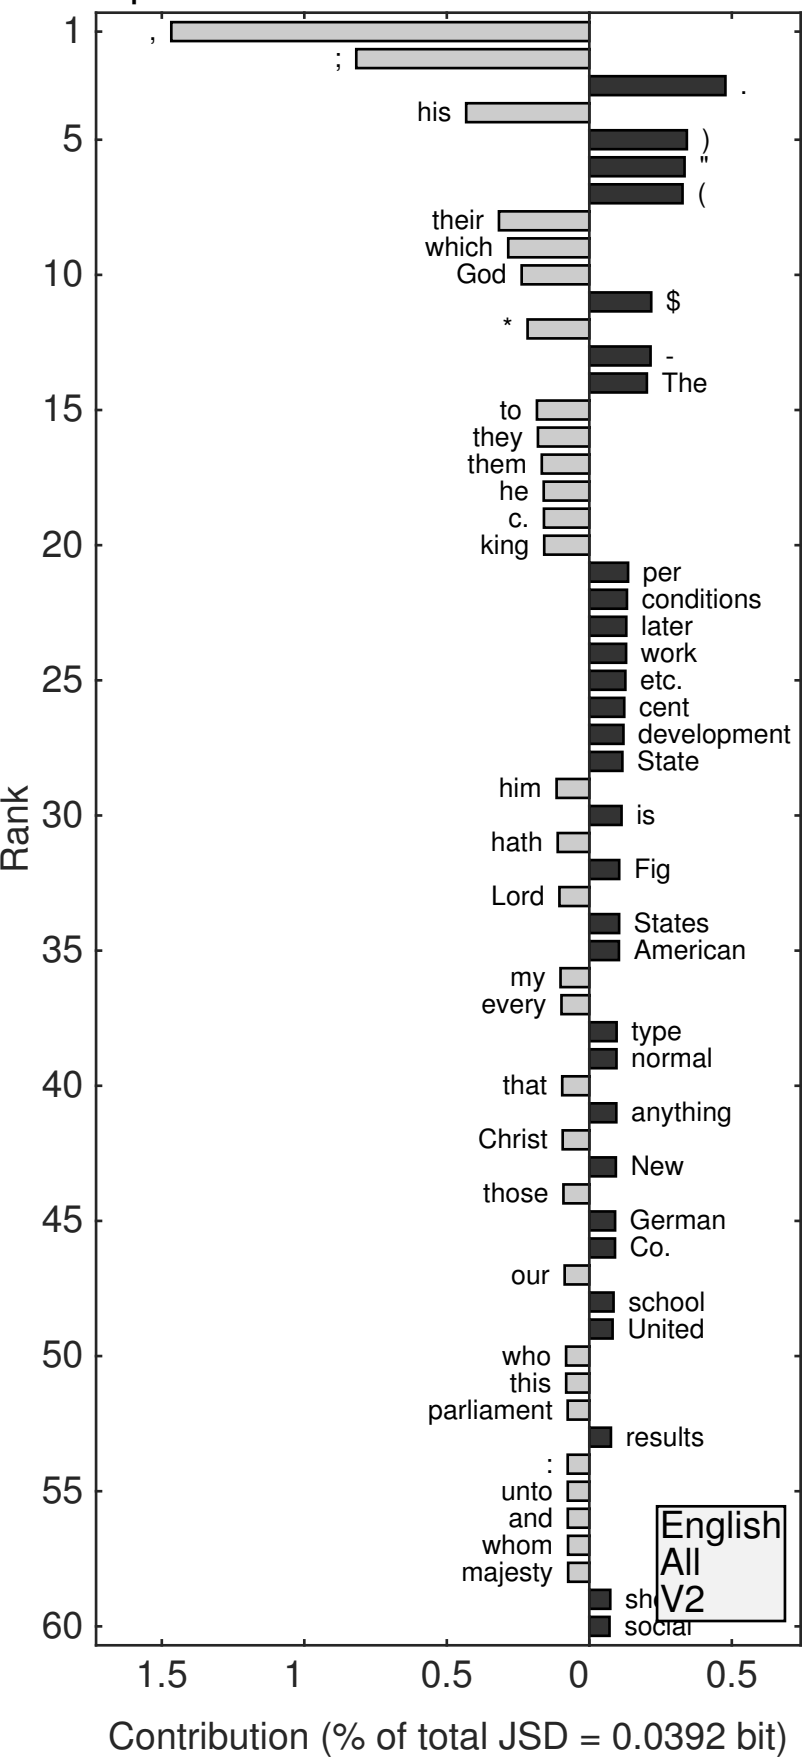

# Top JSD contributions: 1820s to 1920s

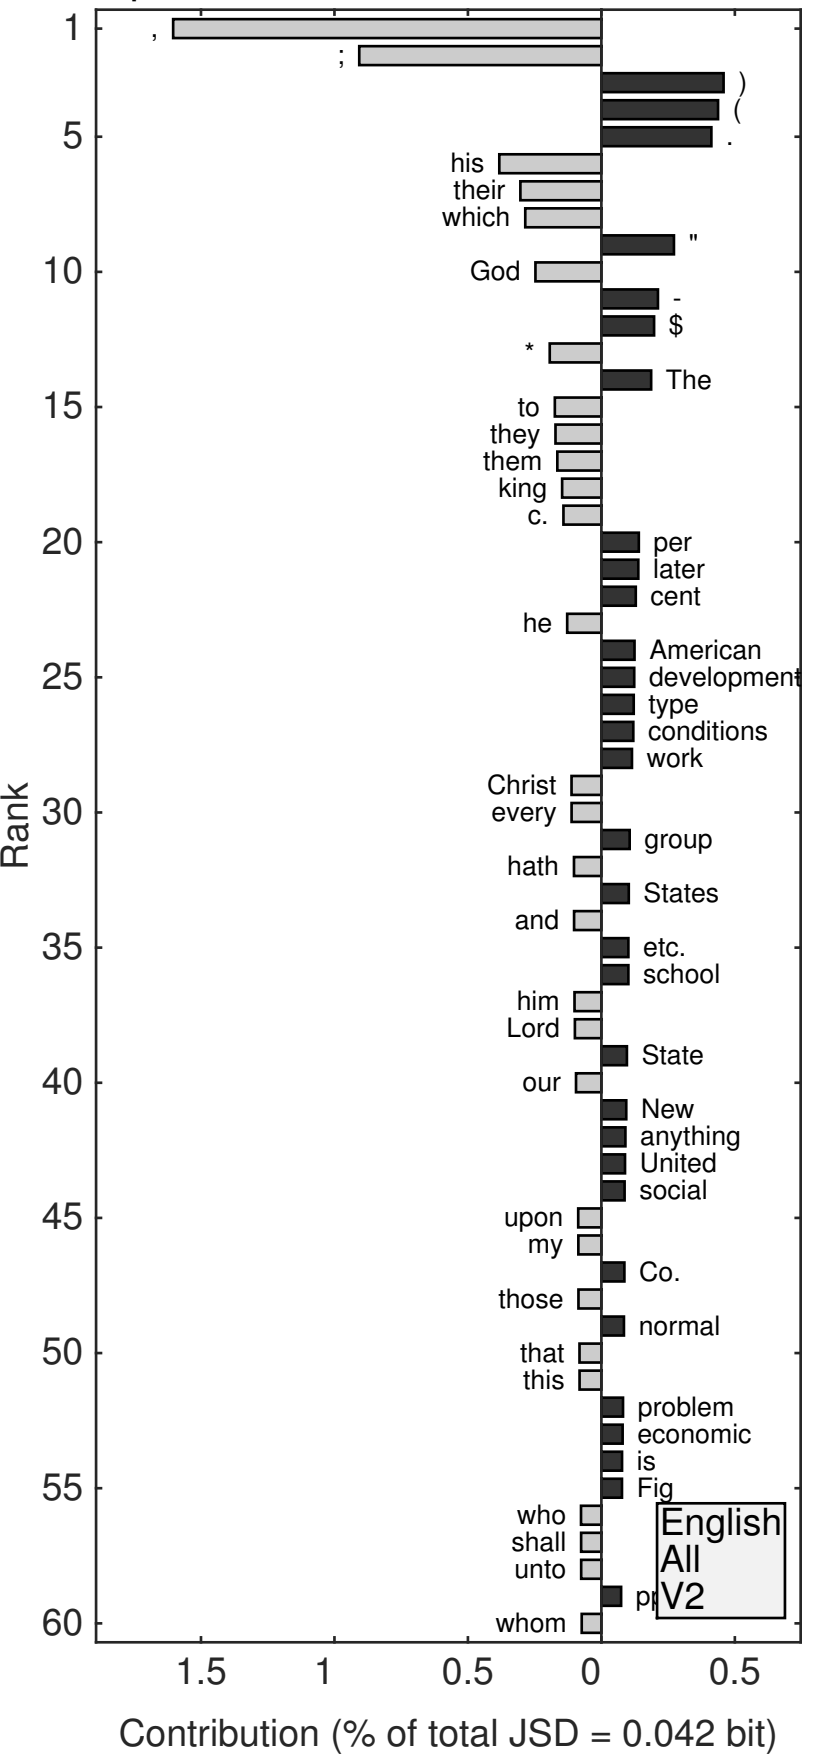

# Top JSD contributions: 1820s to 1930s

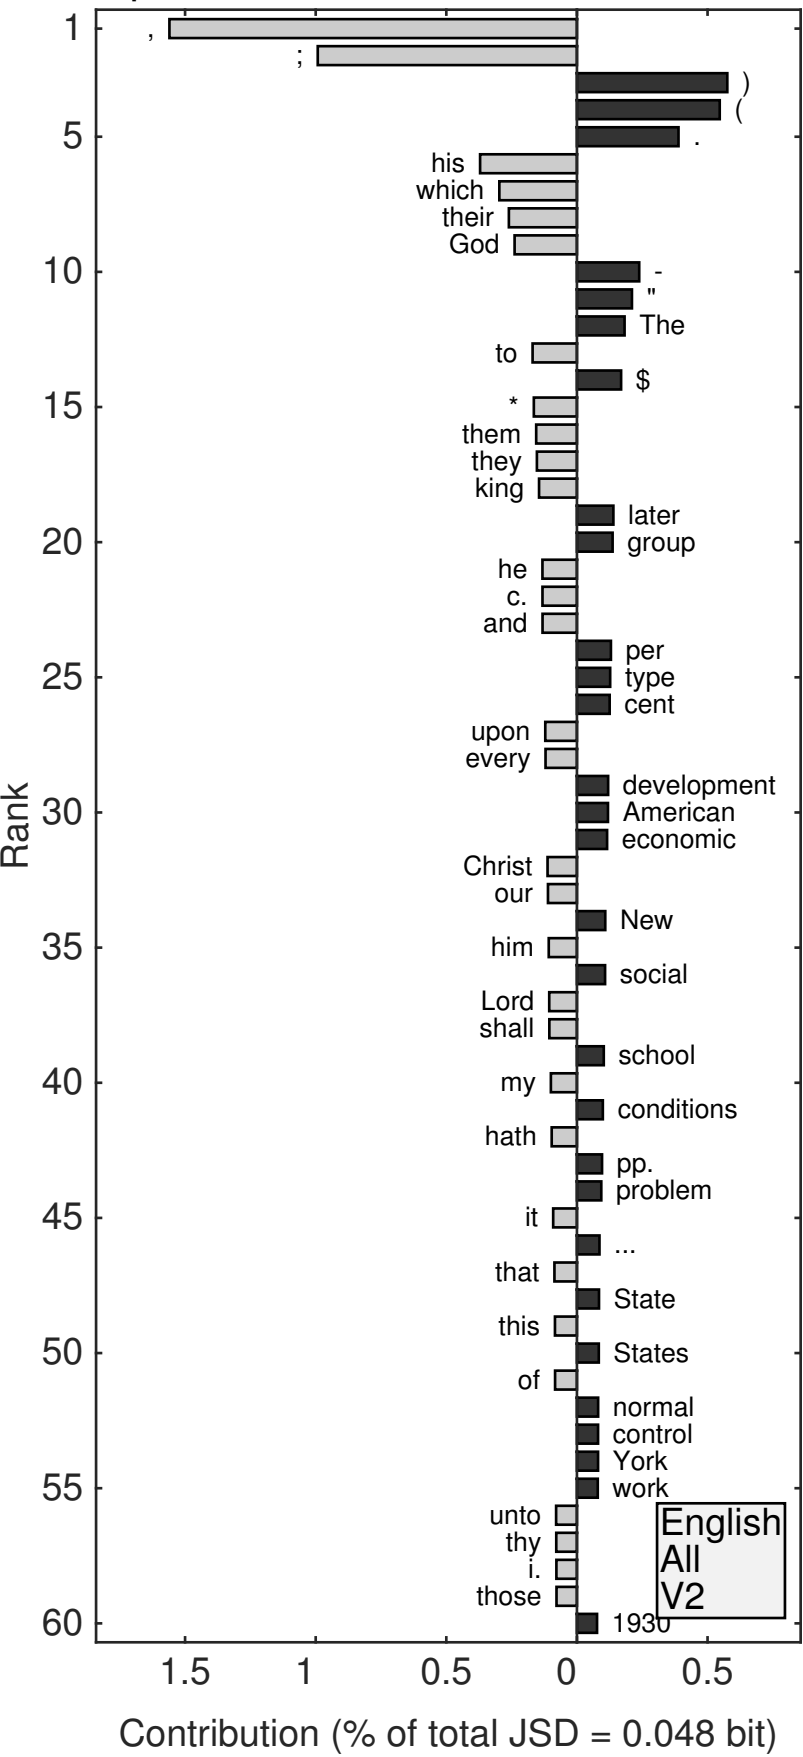



# Top JSD contributions: 1820s to 1940s

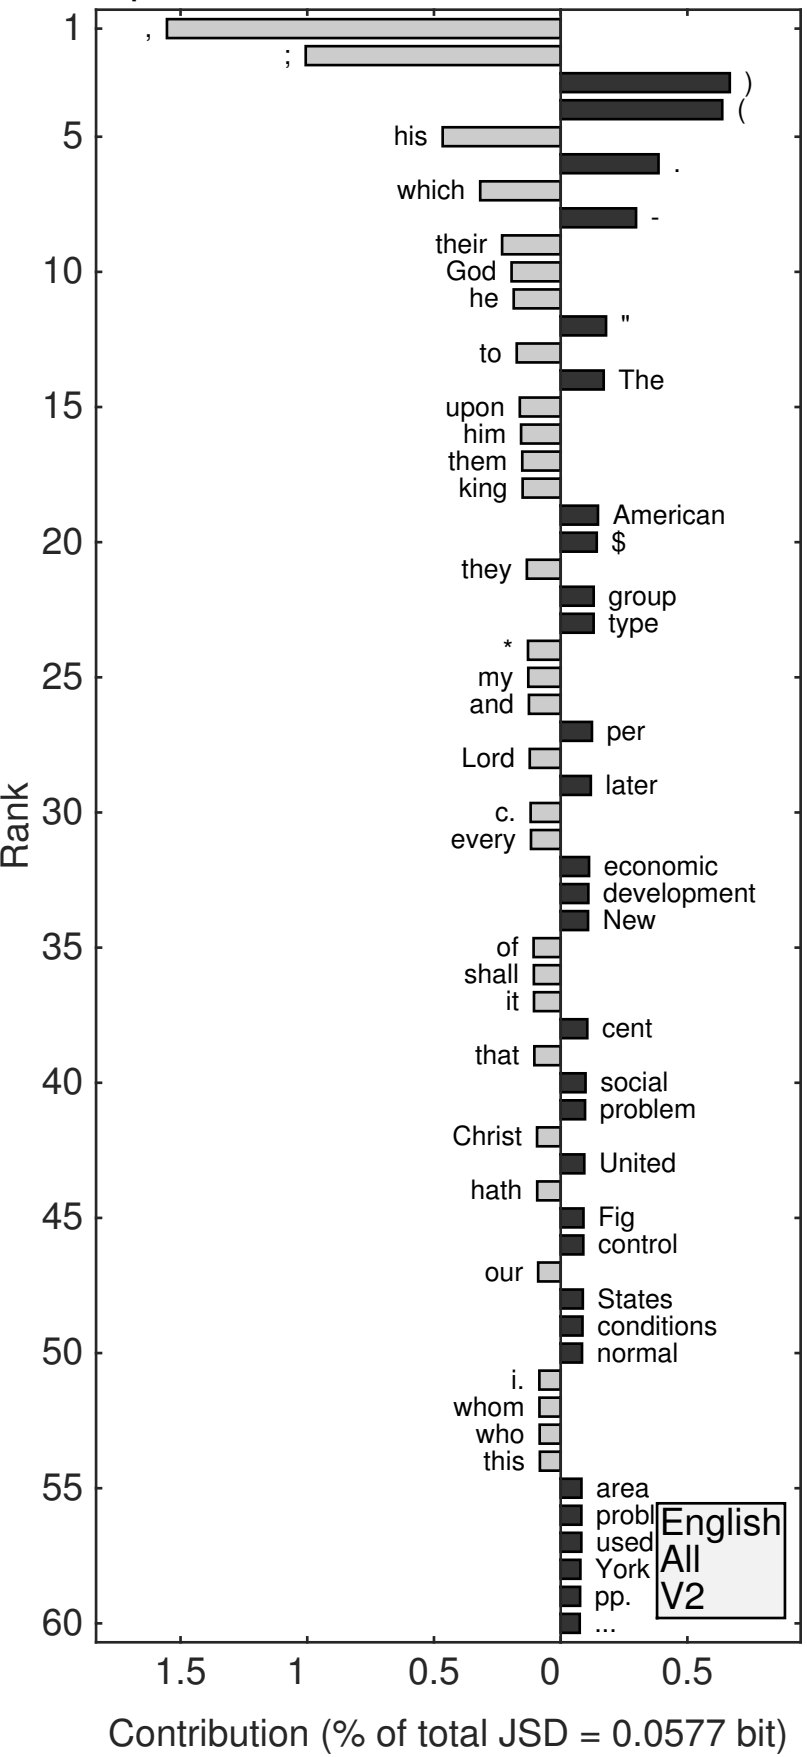

# Top JSD contributions: 1820s to 1950s

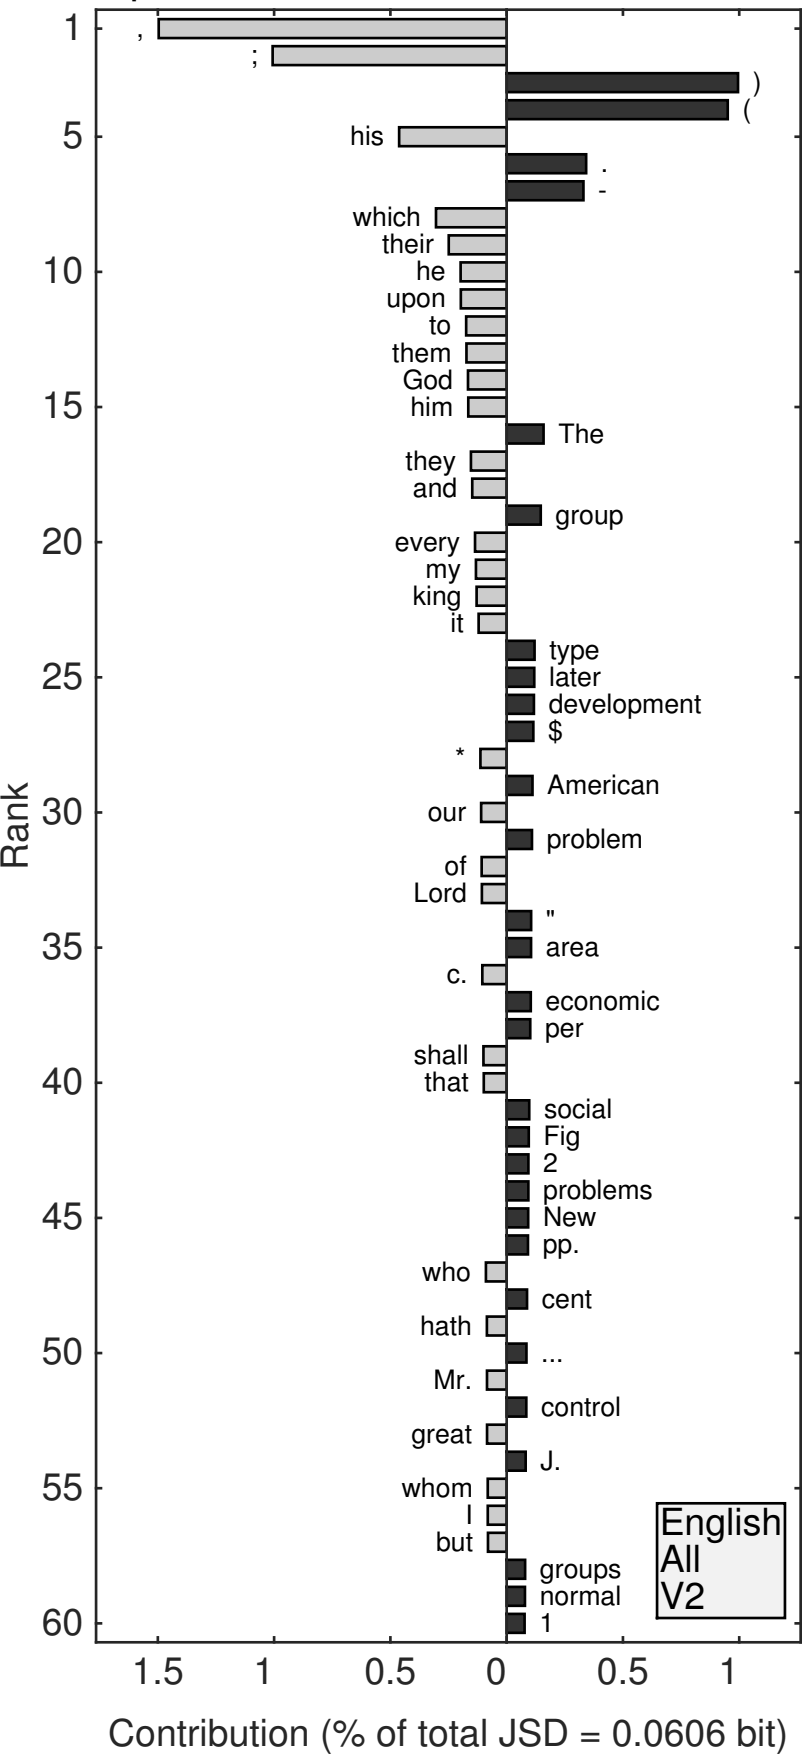

# Top JSD contributions: 1820s to 1960s

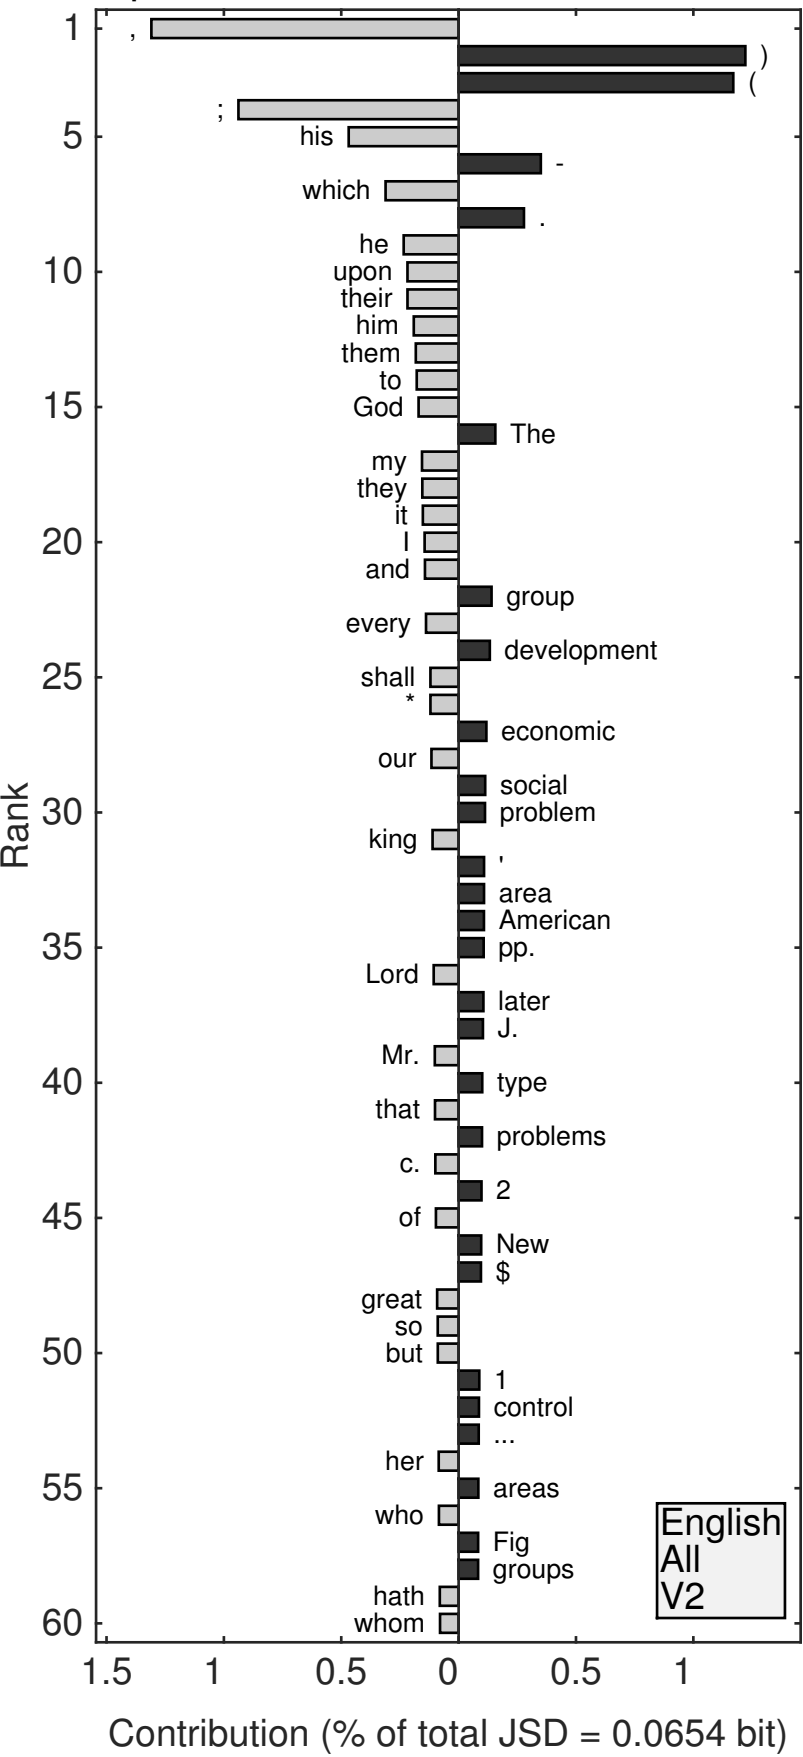

# Top JSD contributions: 1820s to 1970s

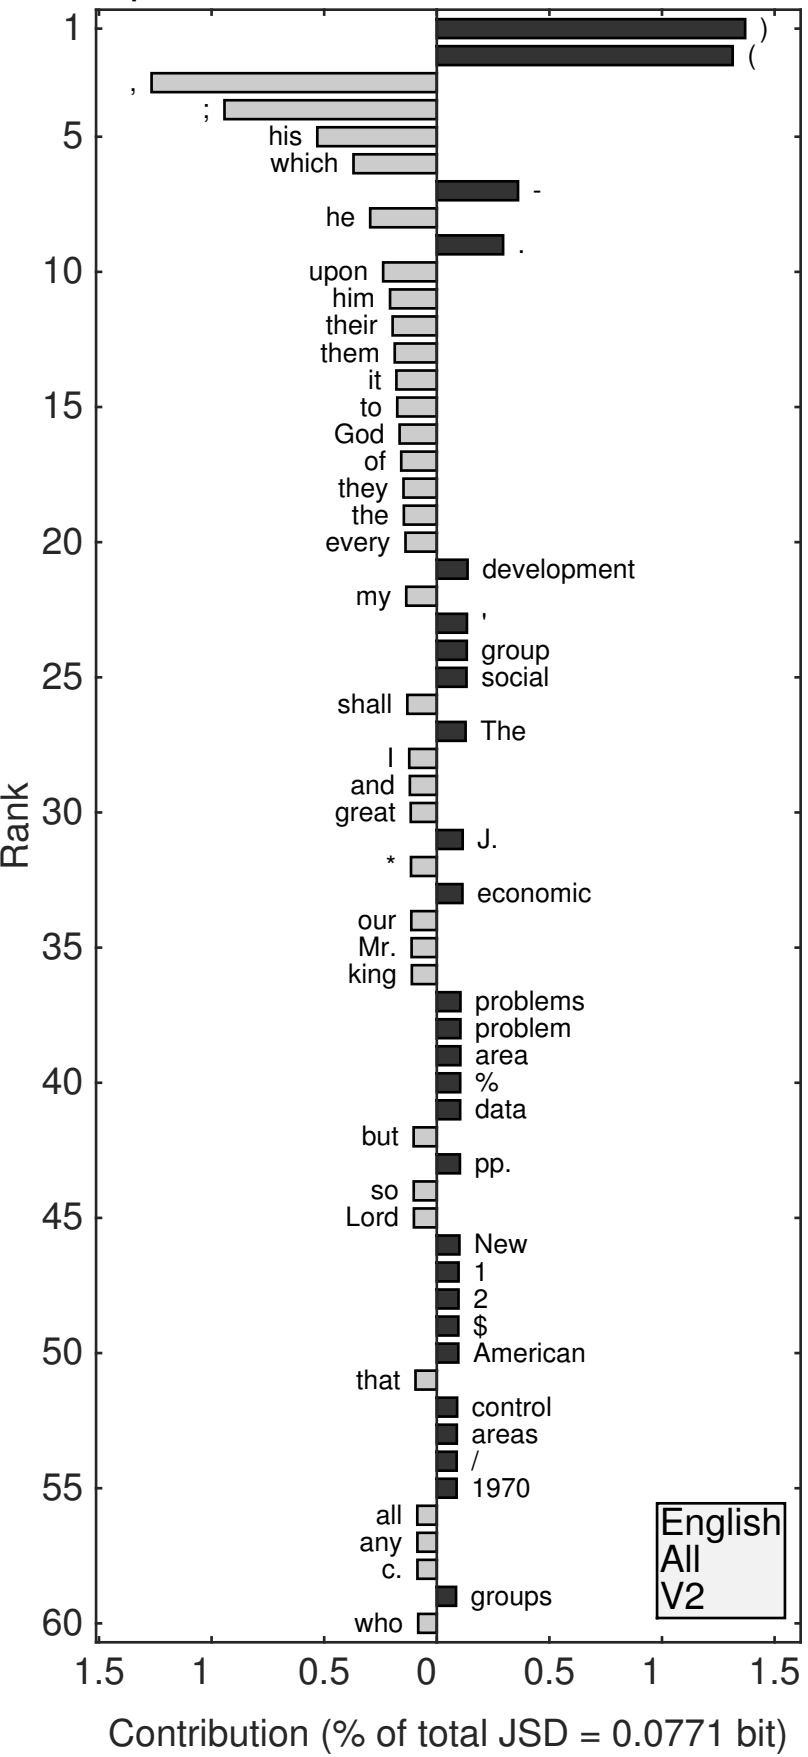

# Top JSD contributions: 1820s to 1980s

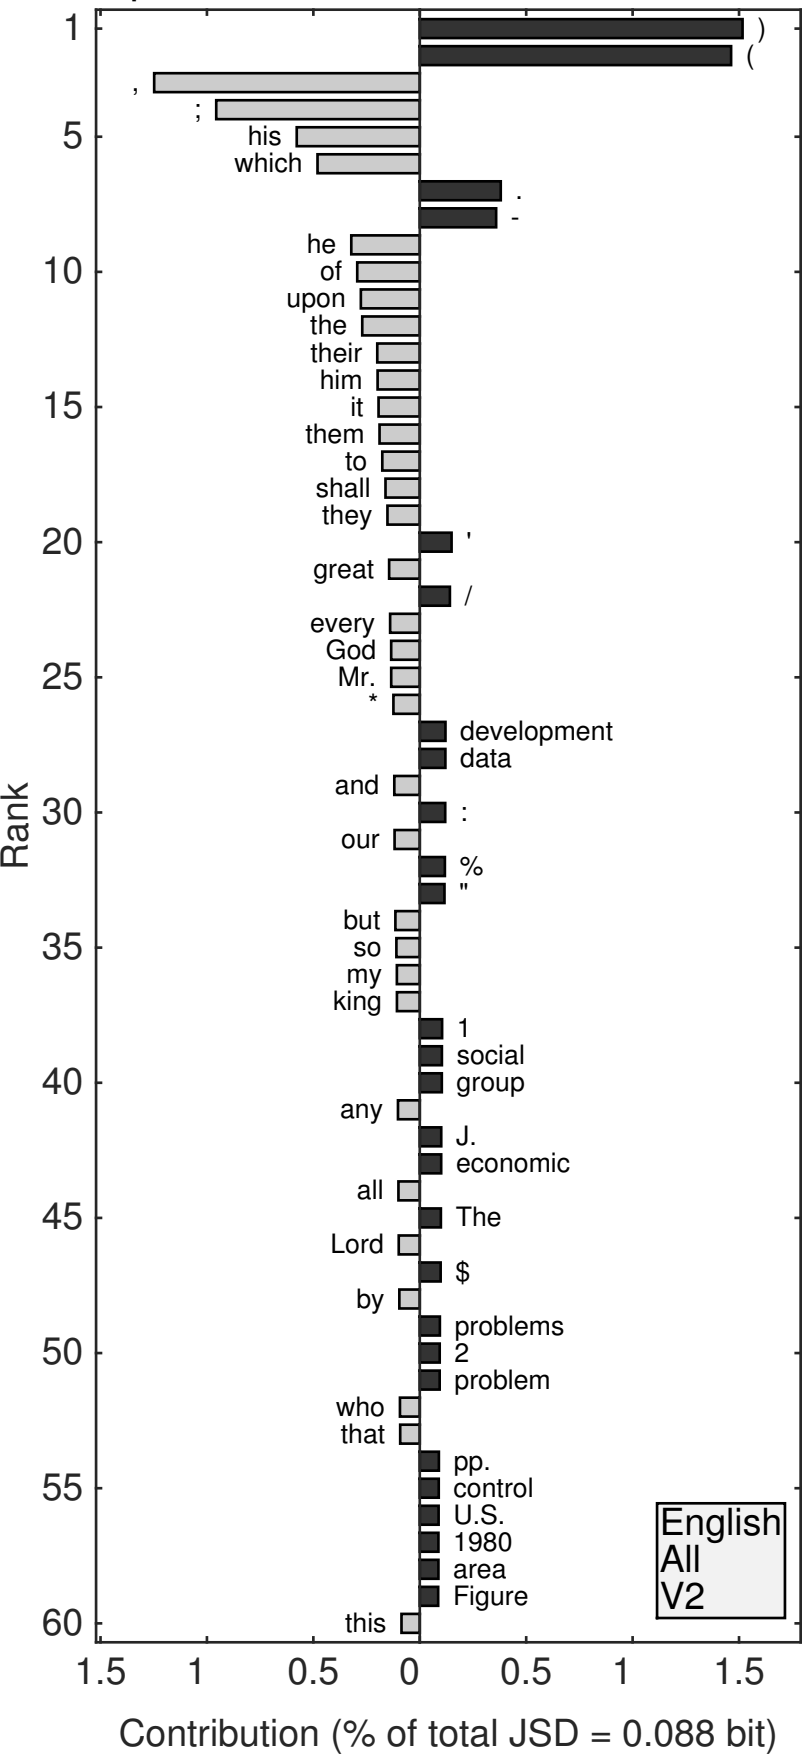

# Top JSD contributions: 1820s to 1990s

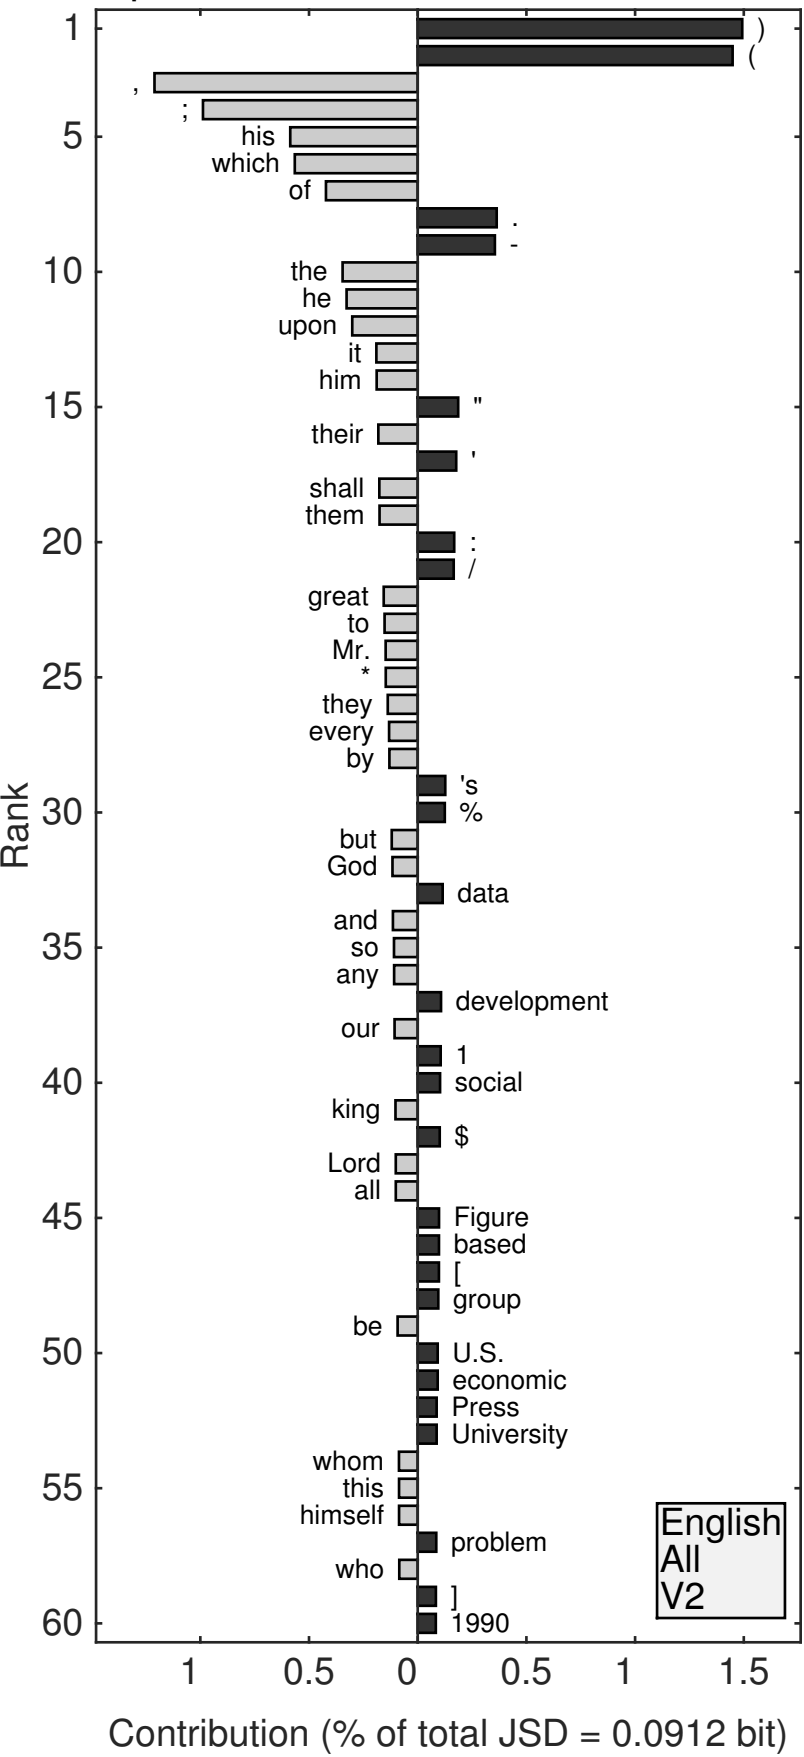

# Top JSD contributions: 1830s to 1840s

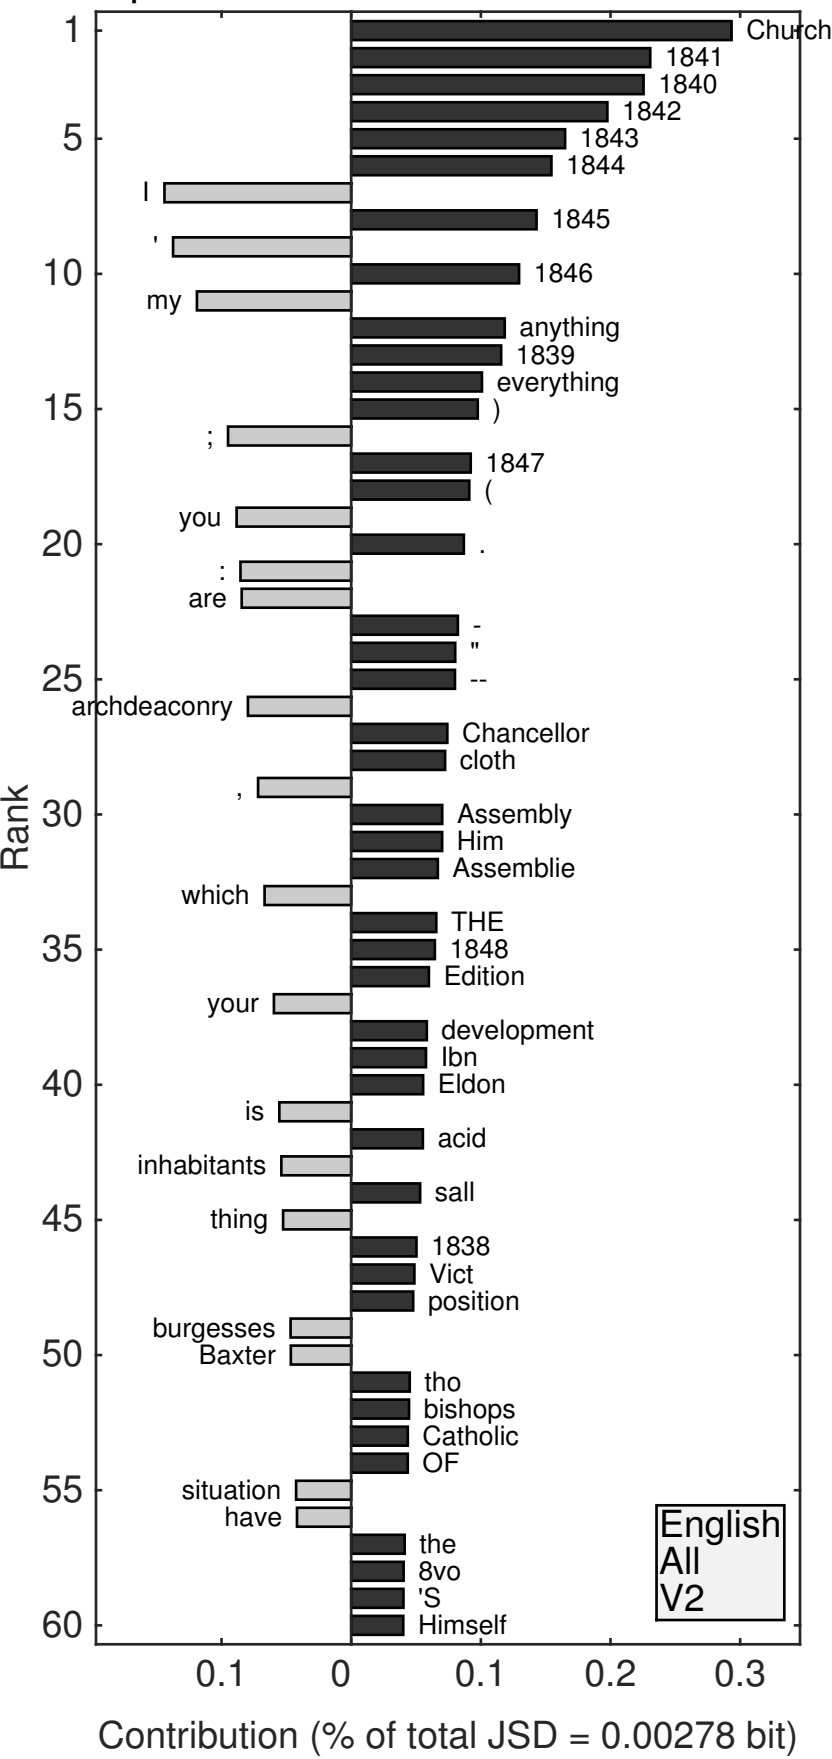

# Top JSD contributions: 1830s to 1850s

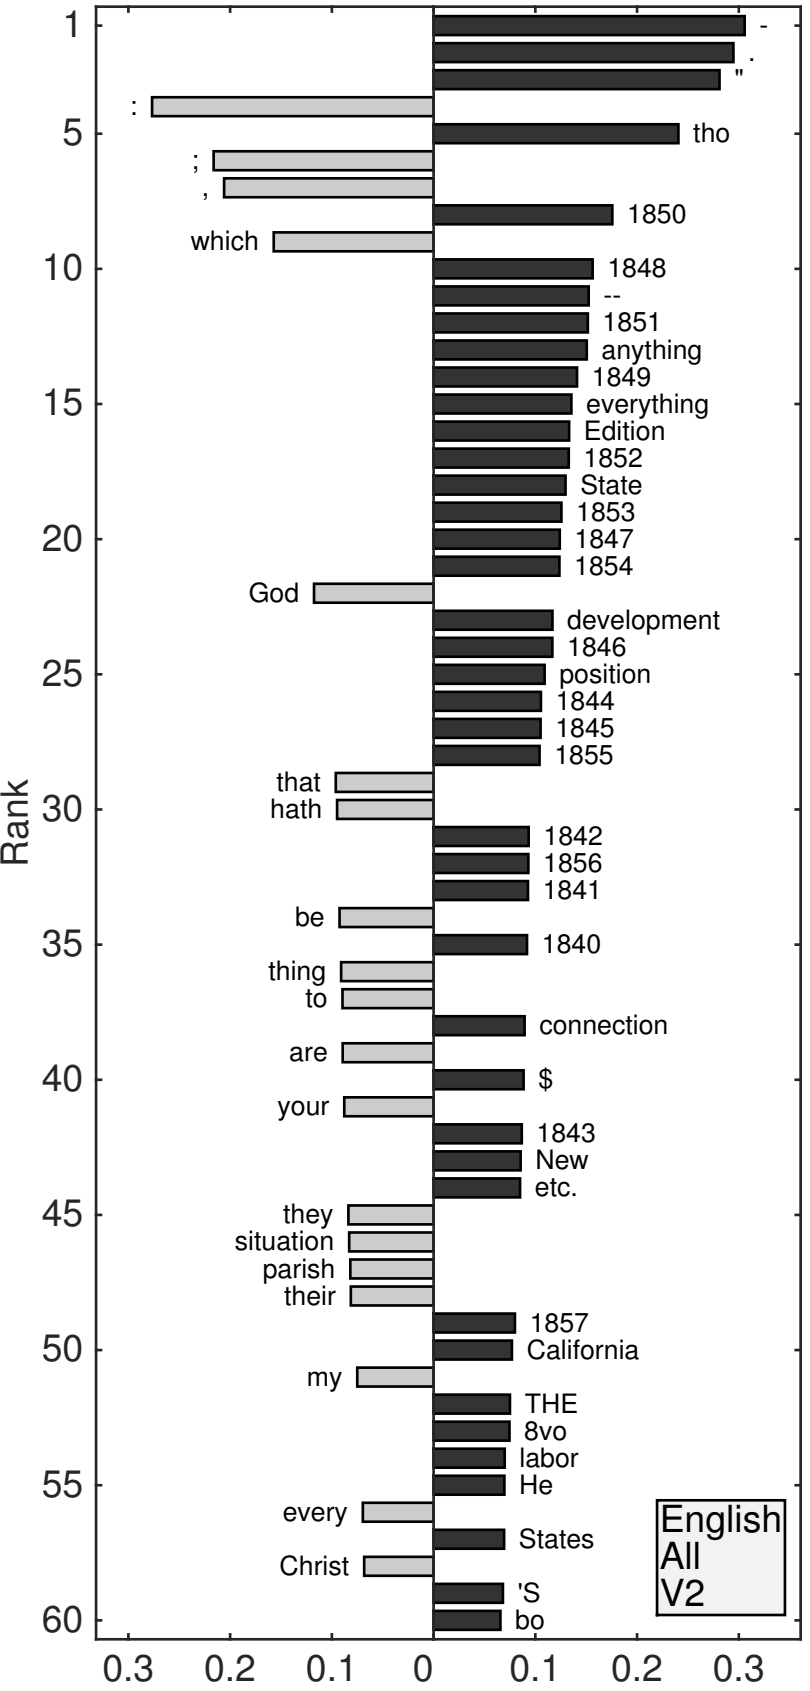

Contribution (% of total JSD = 0.00455 bit)



# Top JSD contributions: 1830s to 1860s

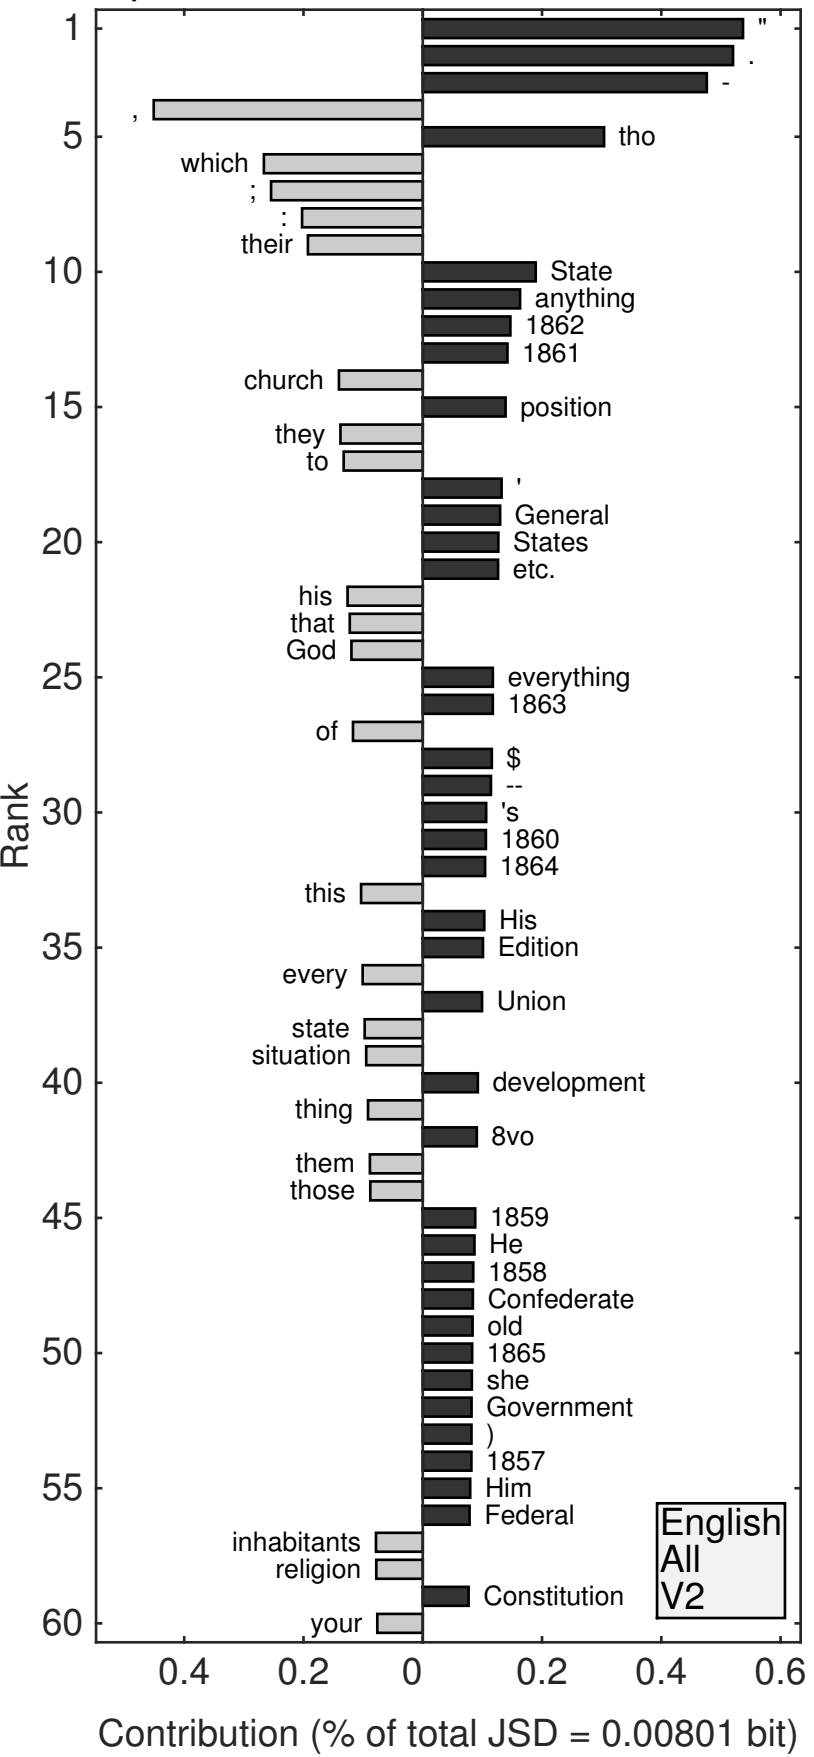

# Top JSD contributions: 1830s to 1870s

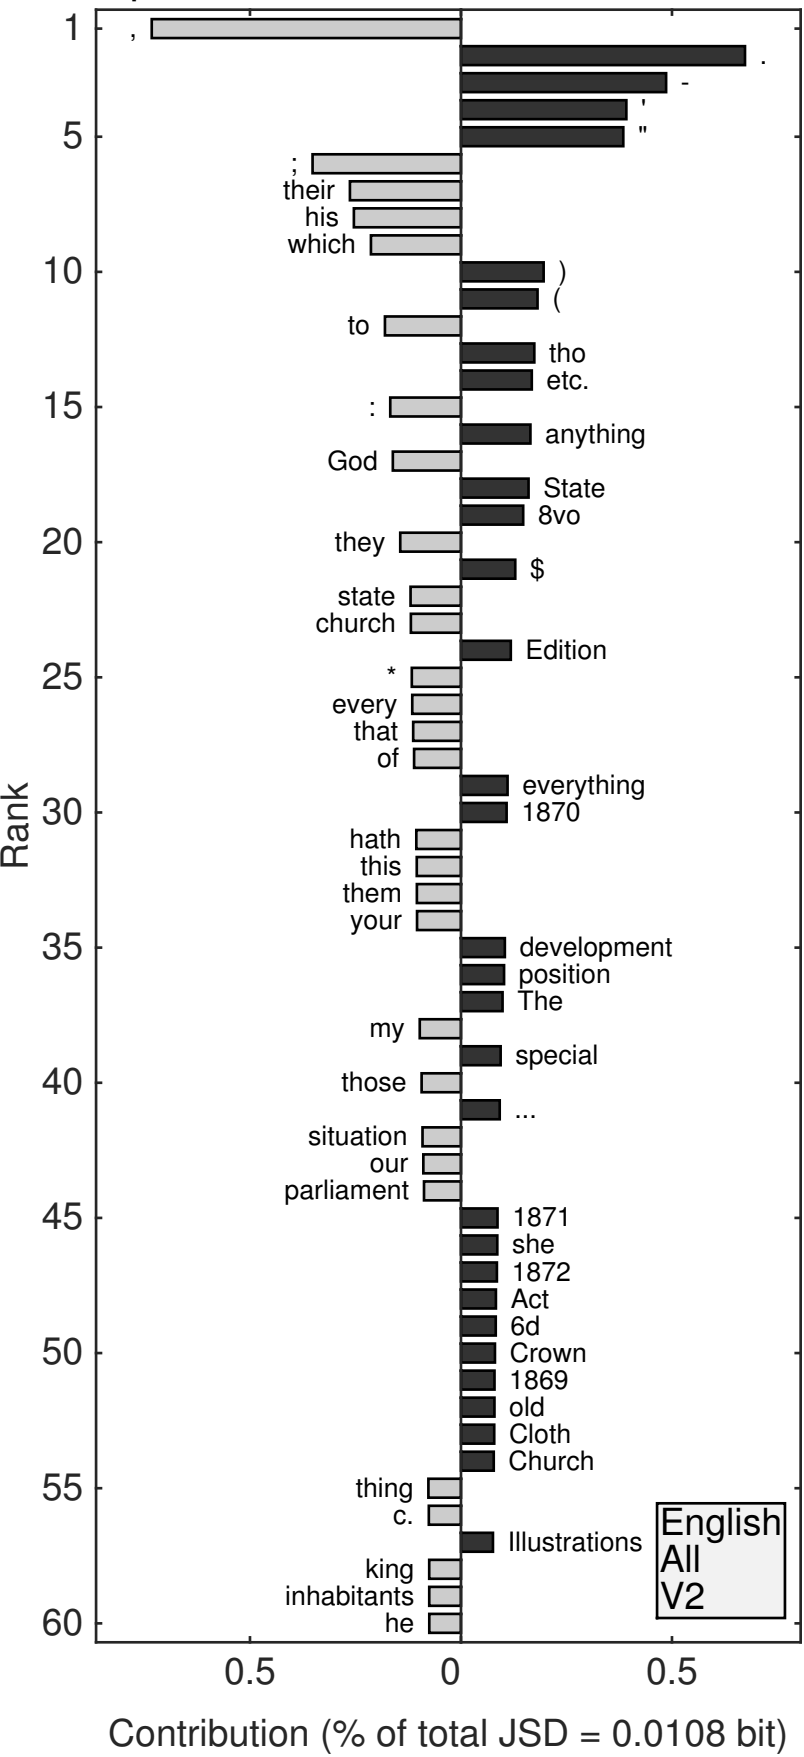

# Top JSD contributions: 1830s to 1880s

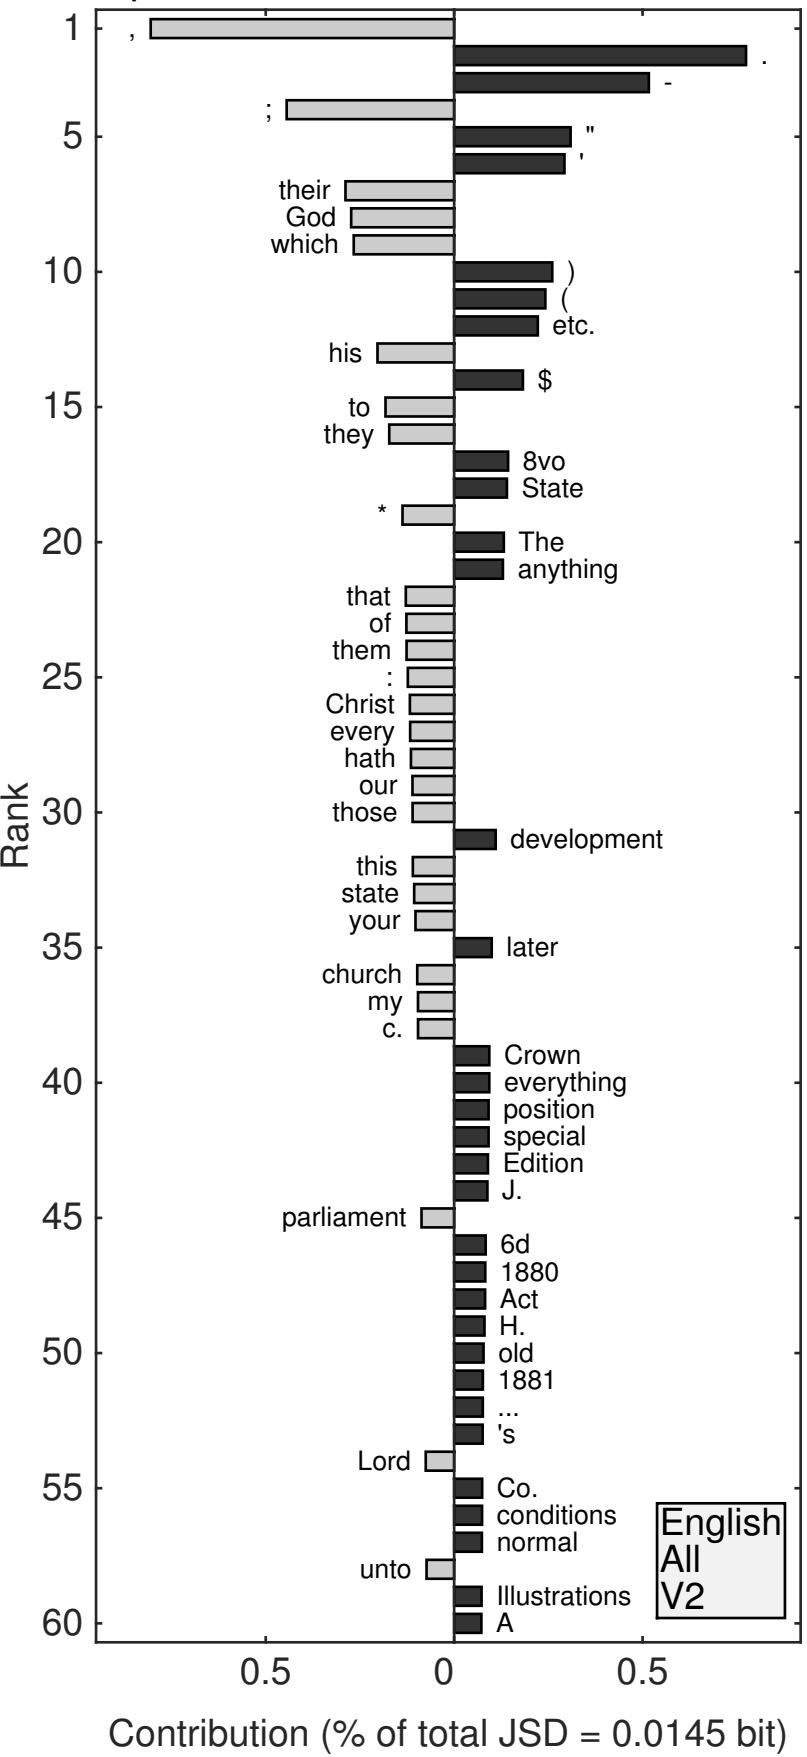

# Top JSD contributions: 1830s to 1890s

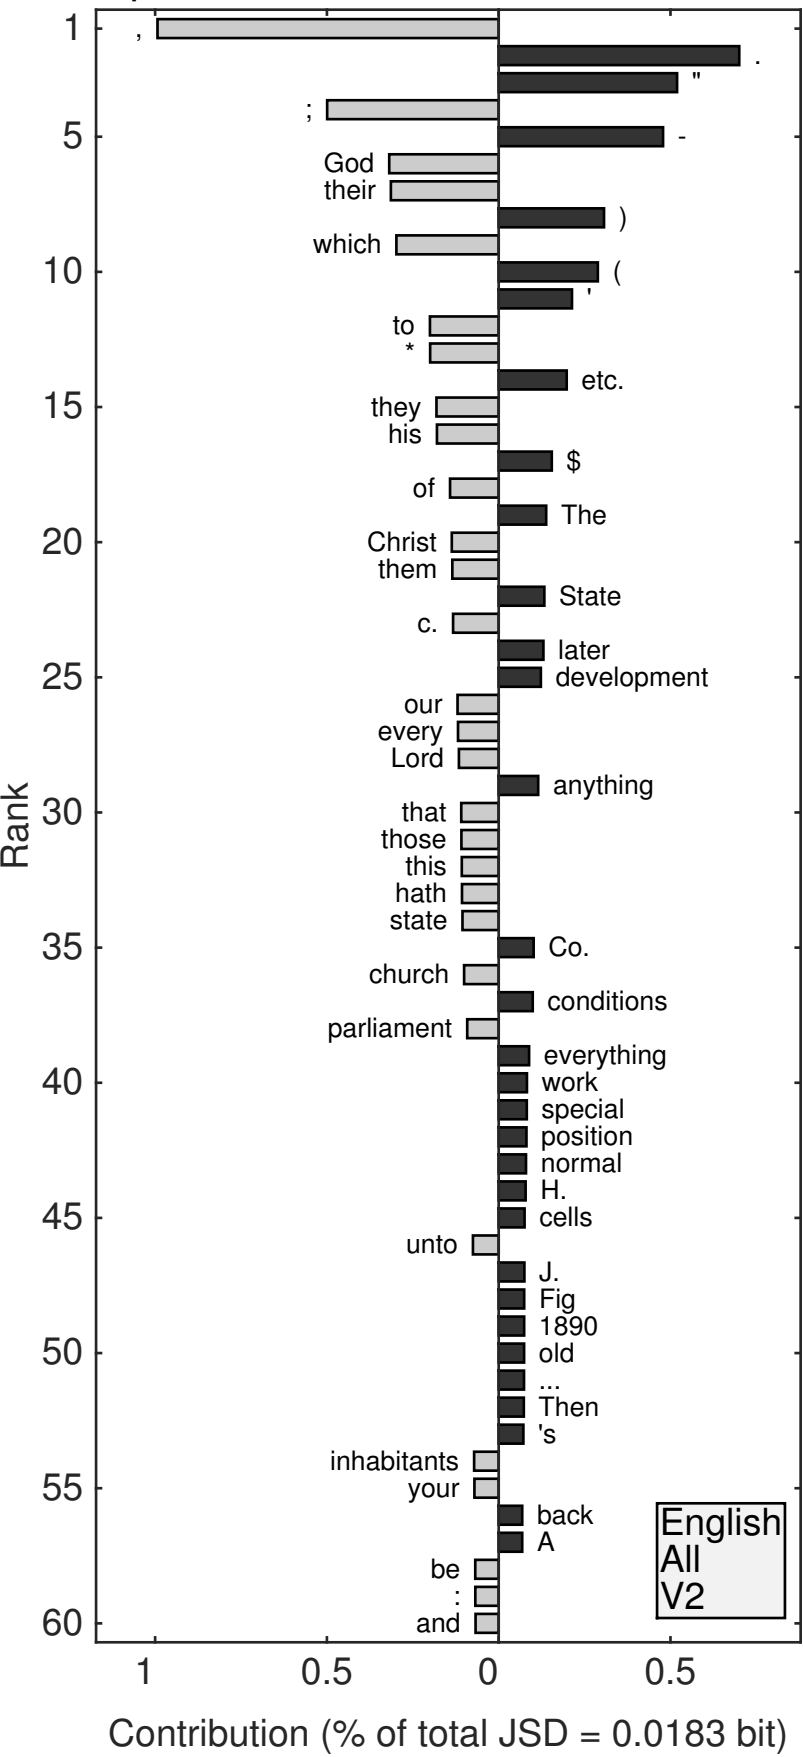

# Top JSD contributions: 1830s to 1900s

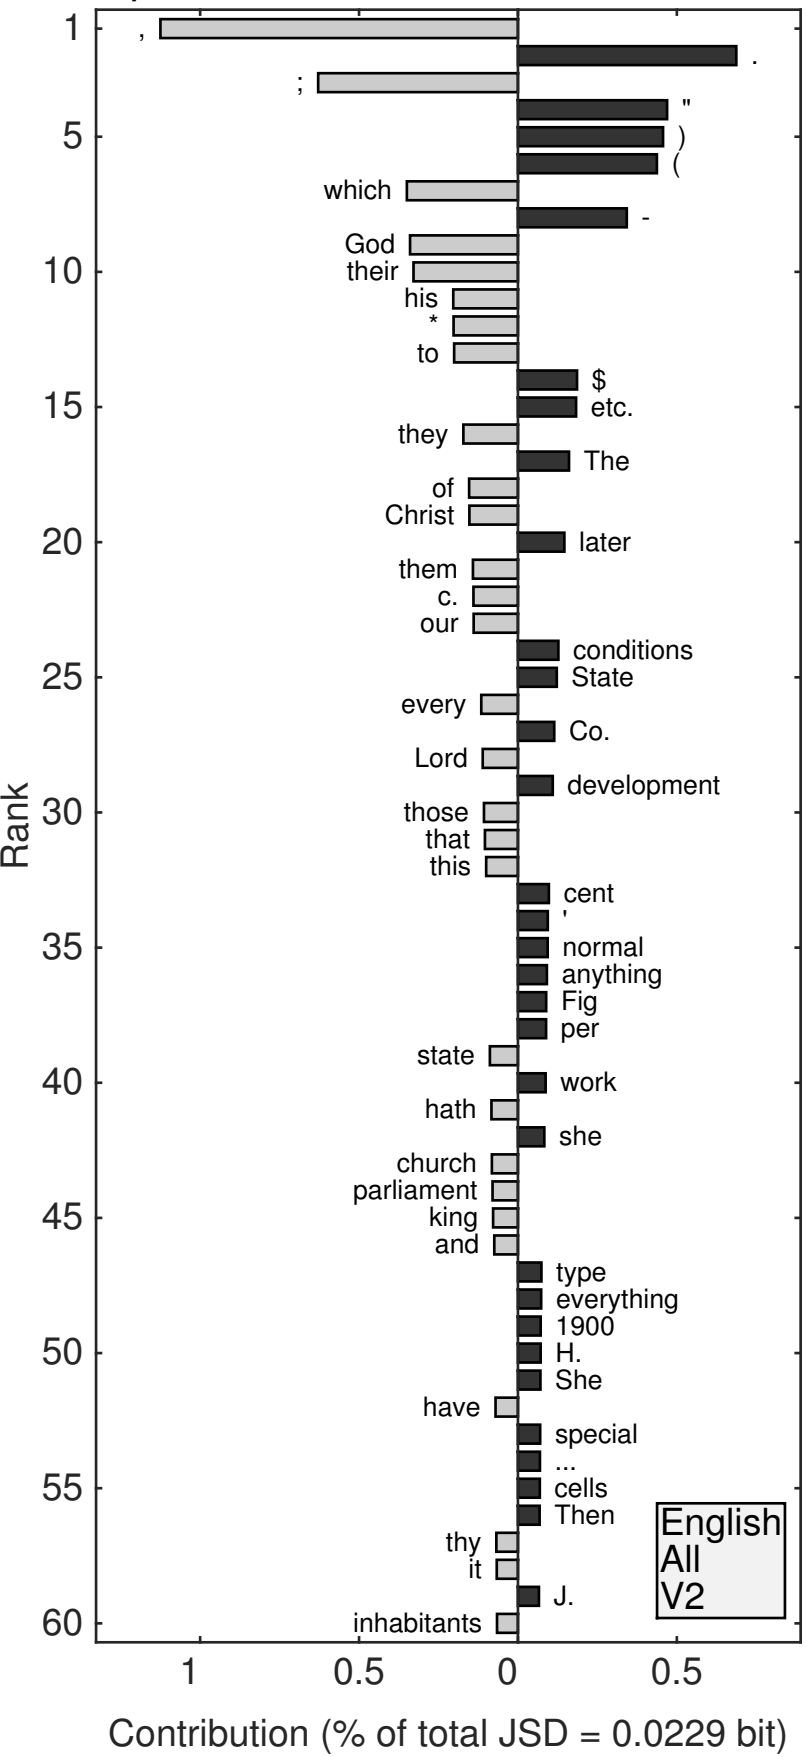

# Top JSD contributions: 1830s to 1910s

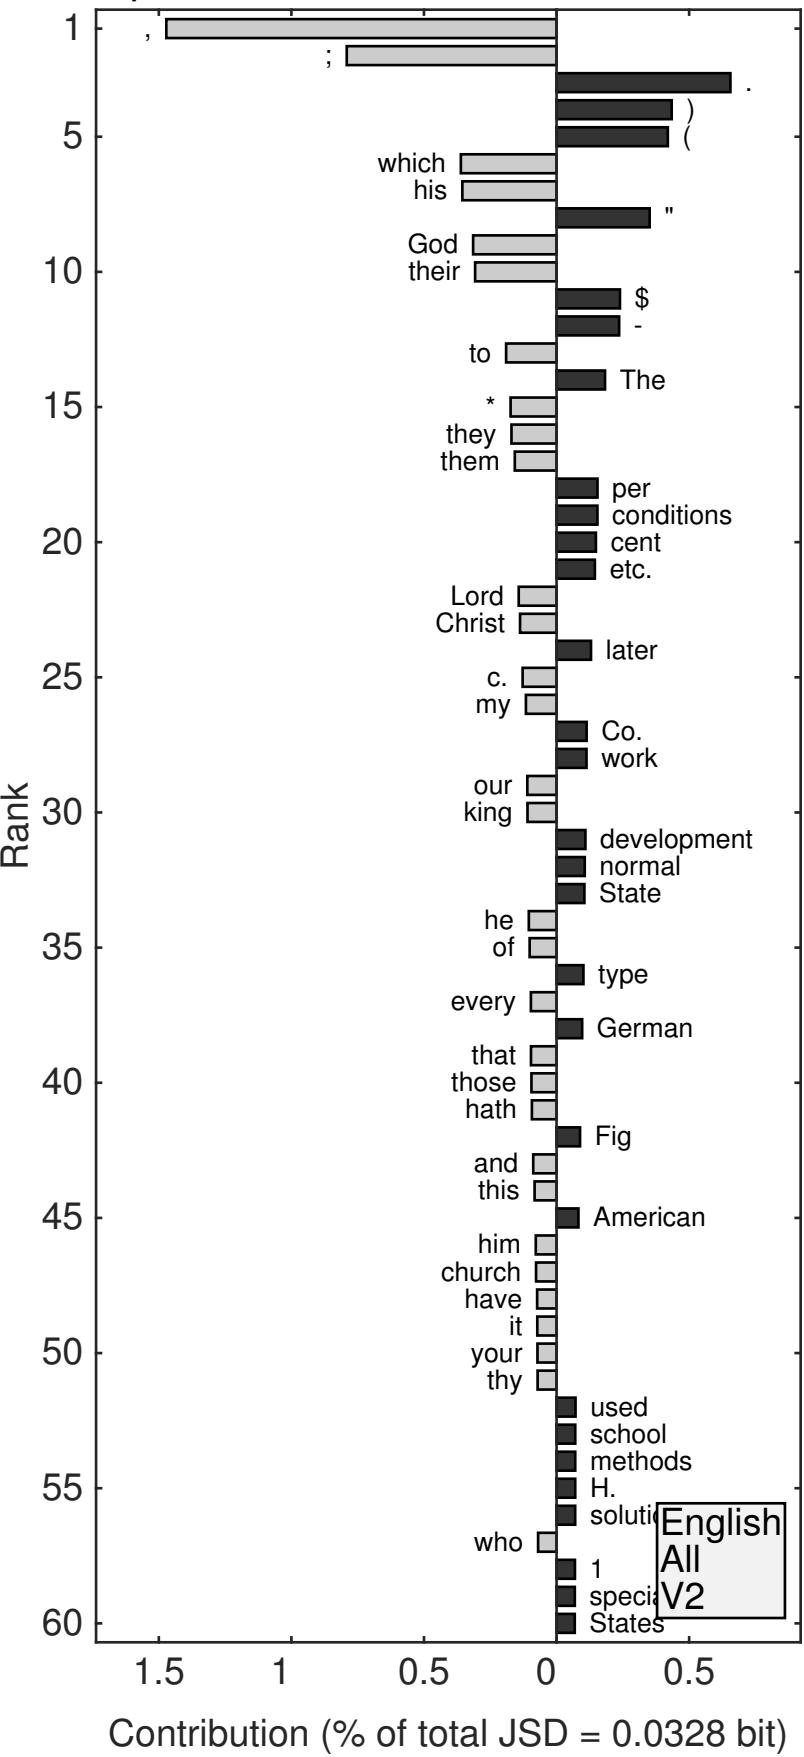

# Top JSD contributions: 1830s to 1920s

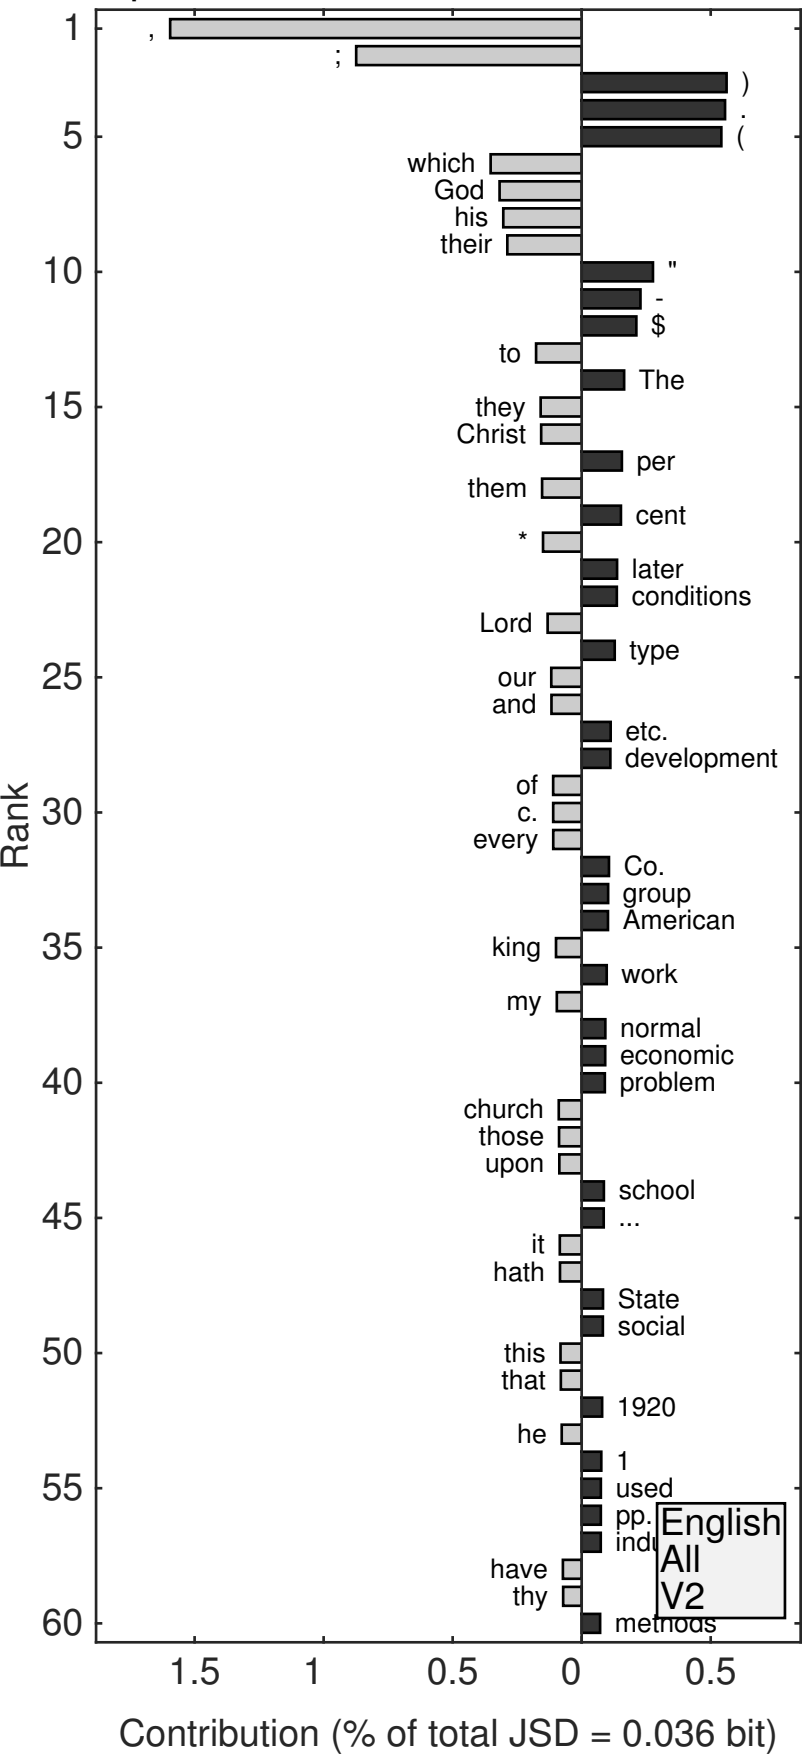

# Top JSD contributions: 1830s to 1930s

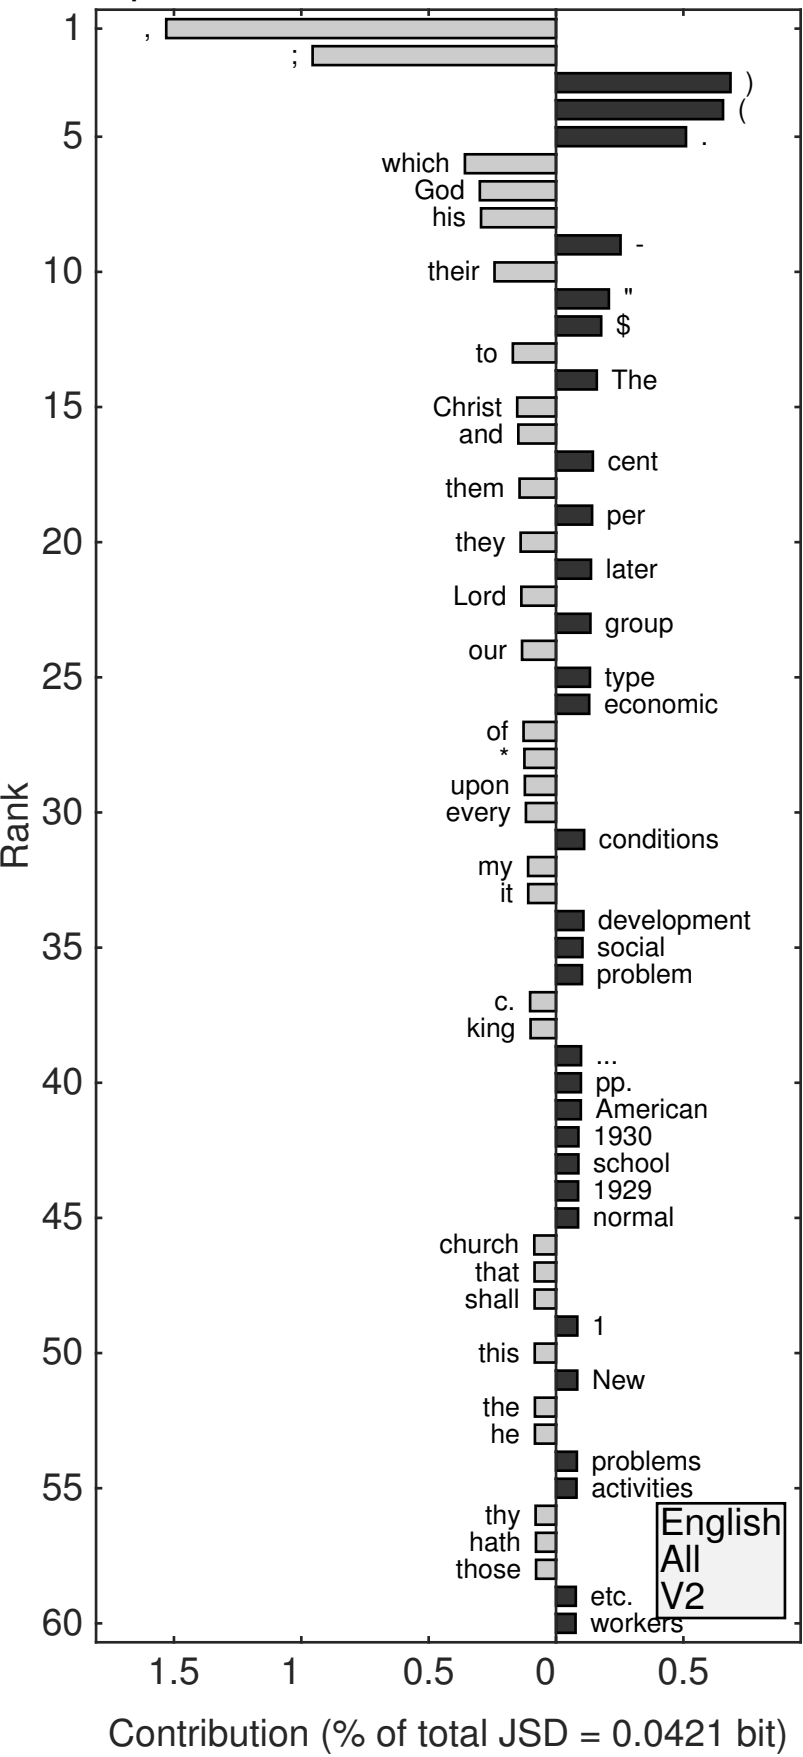



# Top JSD contributions: 1830s to 1940s

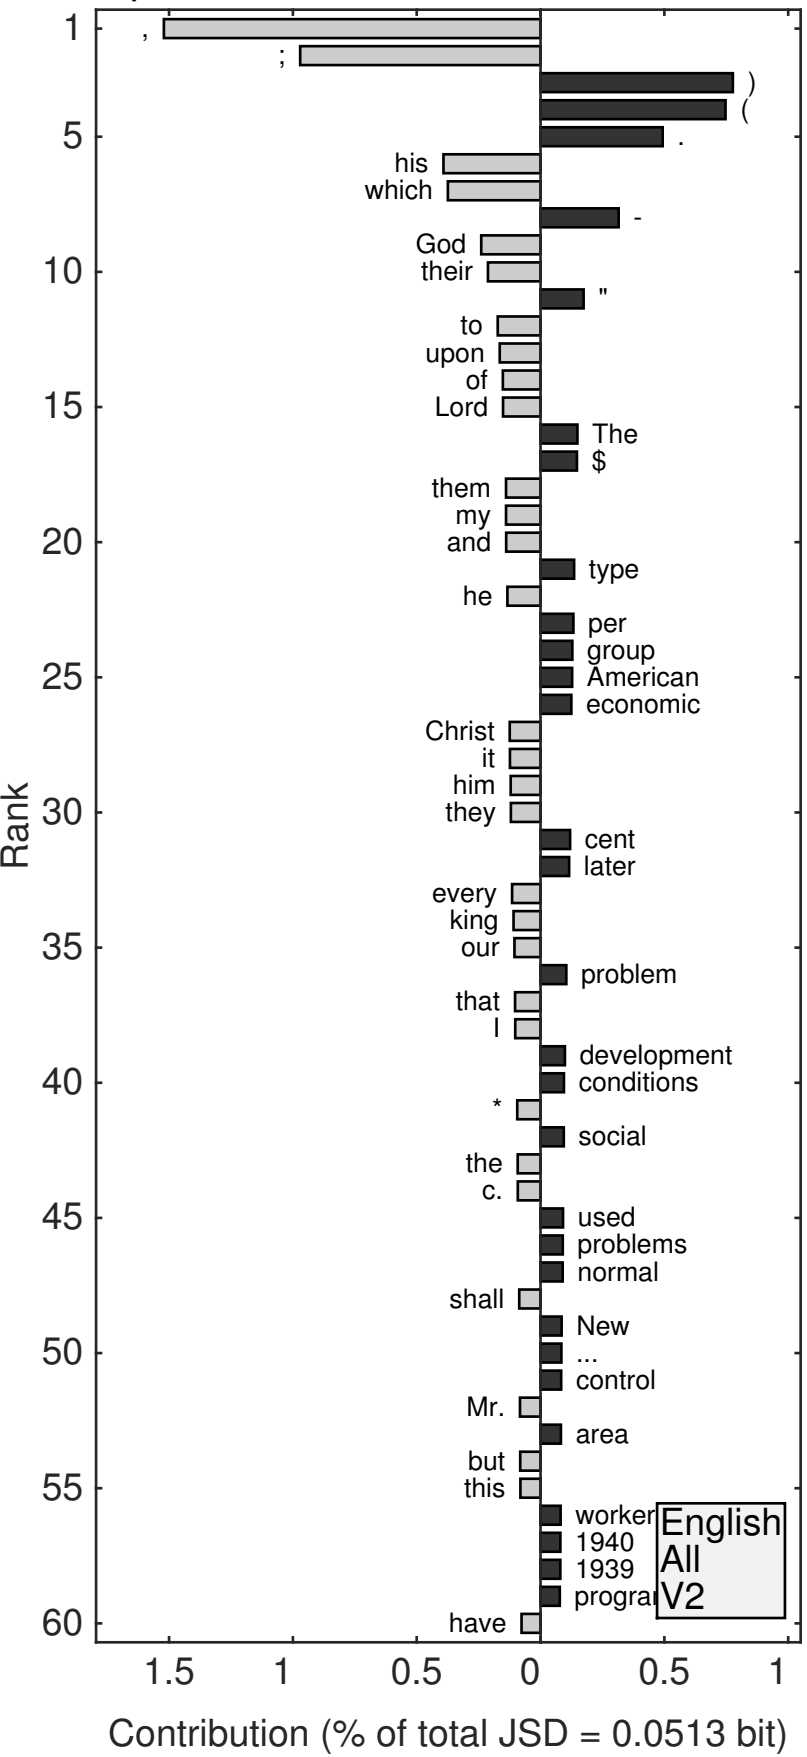

# Top JSD contributions: 1830s to 1950s

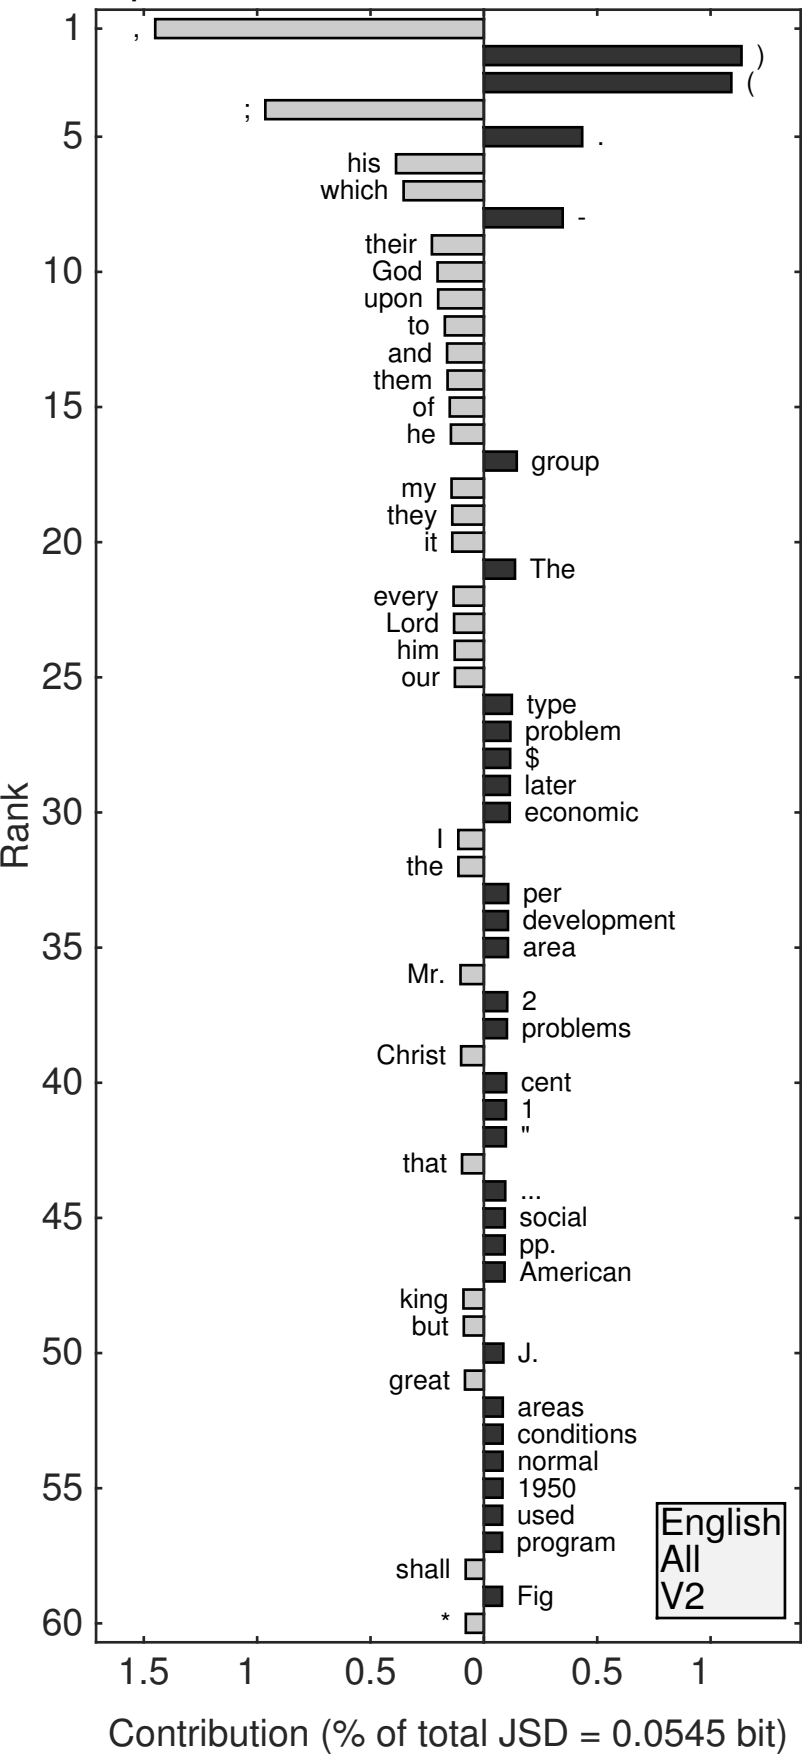

# Top JSD contributions: 1830s to 1960s

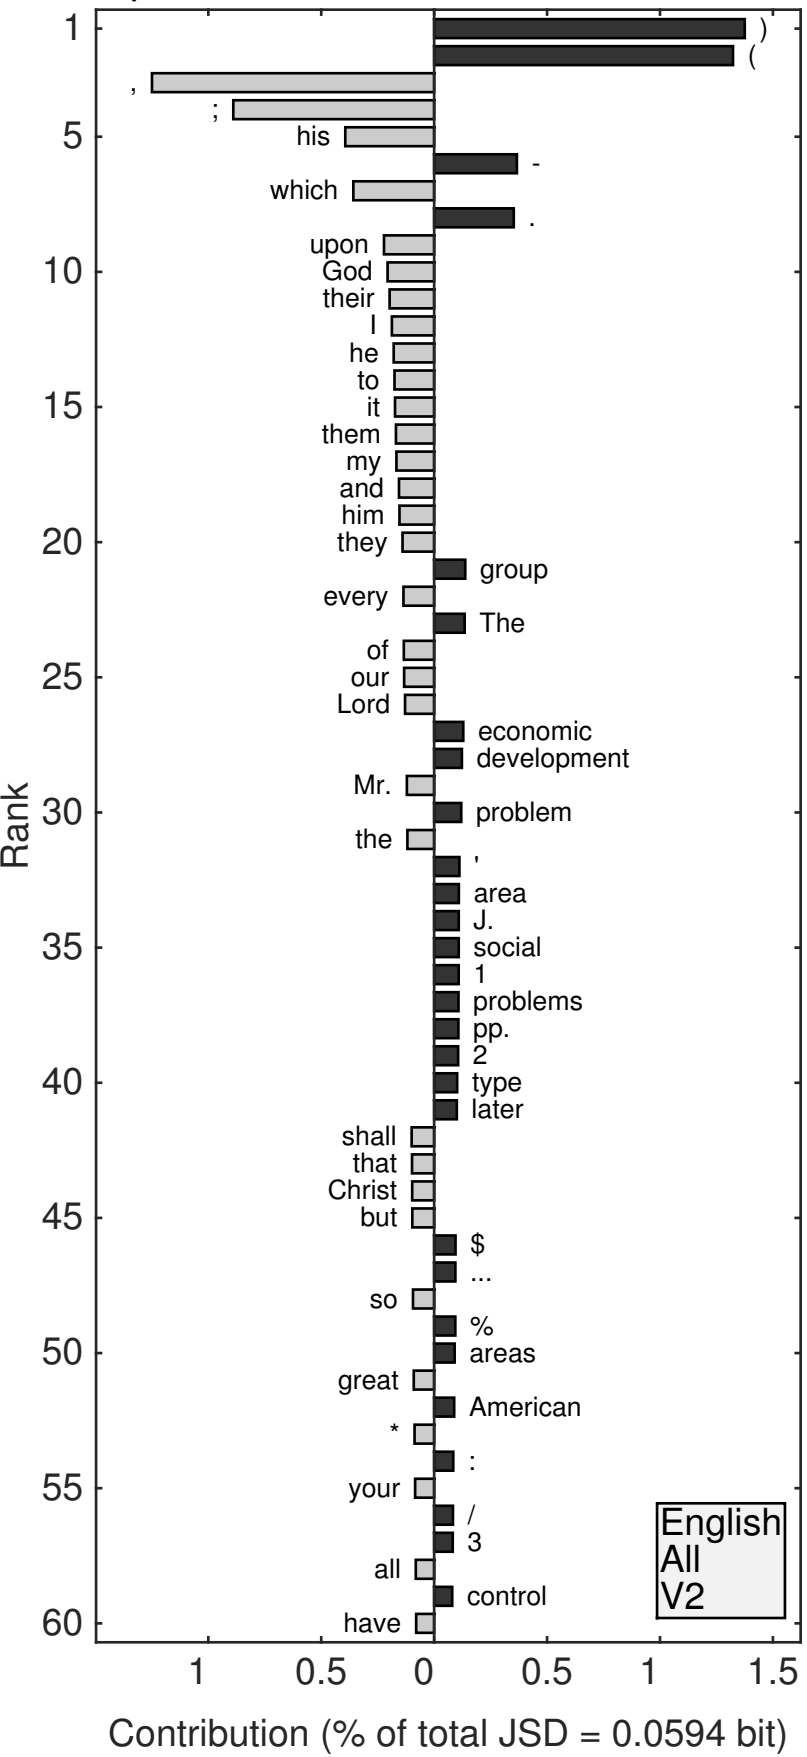

# Top JSD contributions: 1830s to 1970s

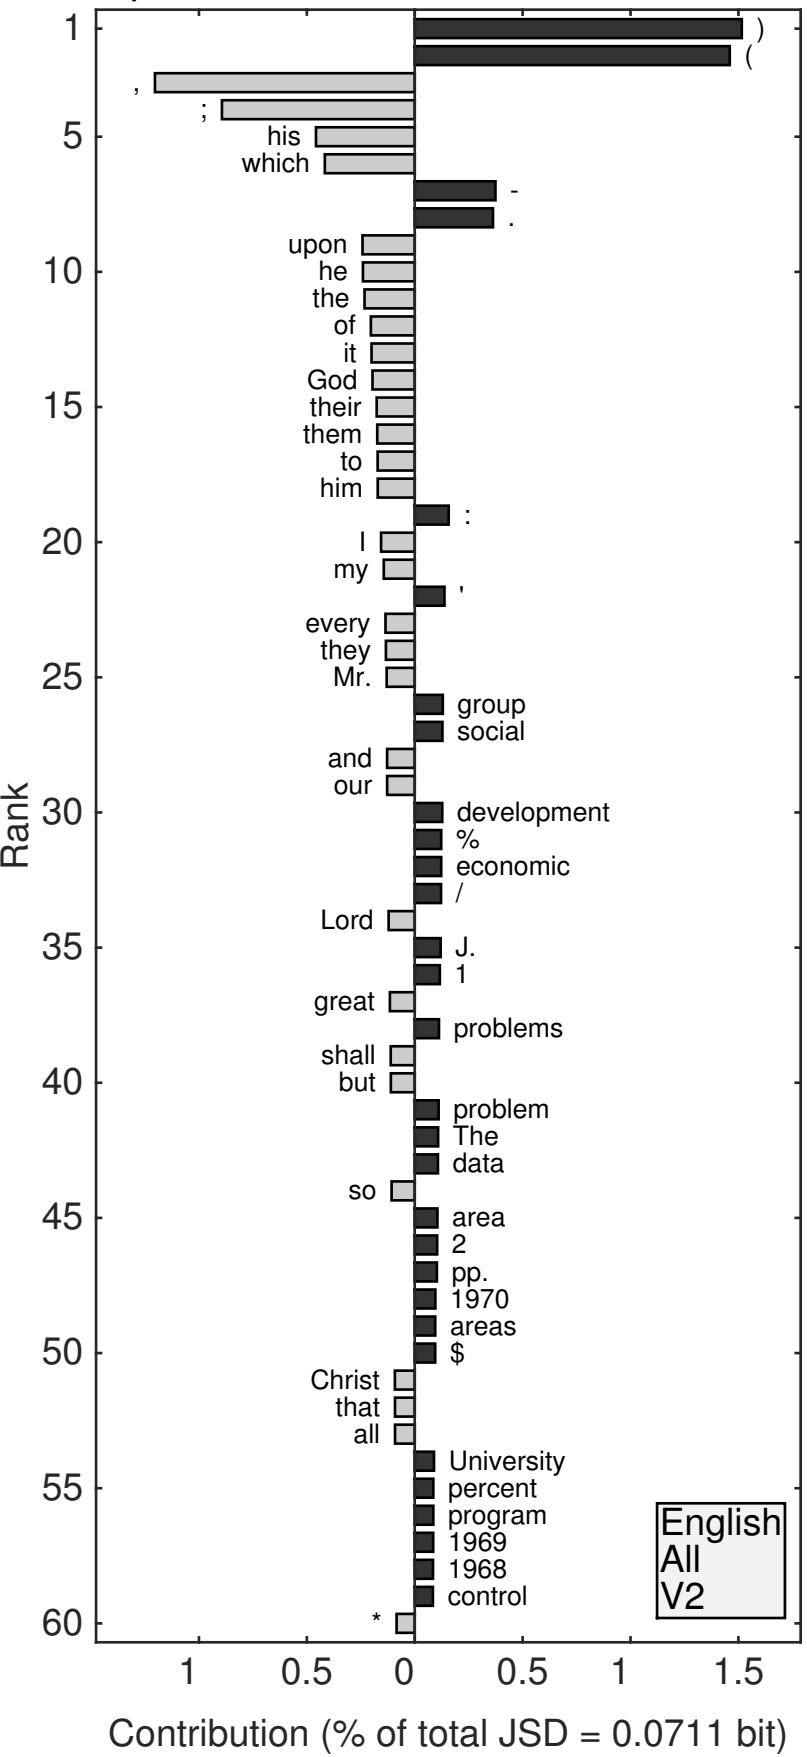

# Top JSD contributions: 1830s to 1980s

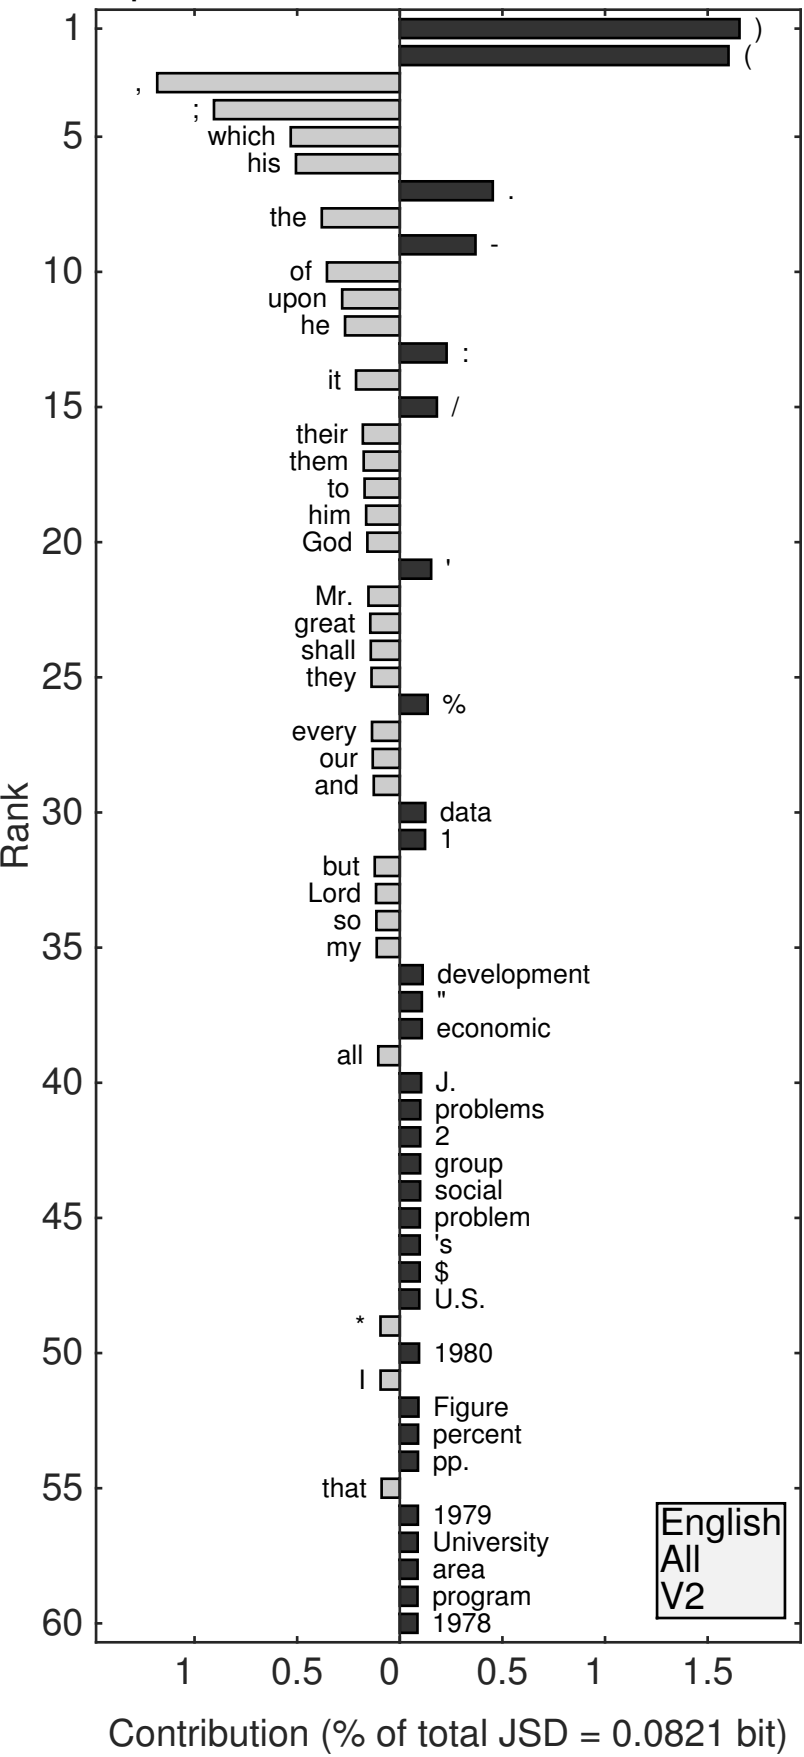

English  
All  
V2

# Top JSD contributions: 1830s to 1990s

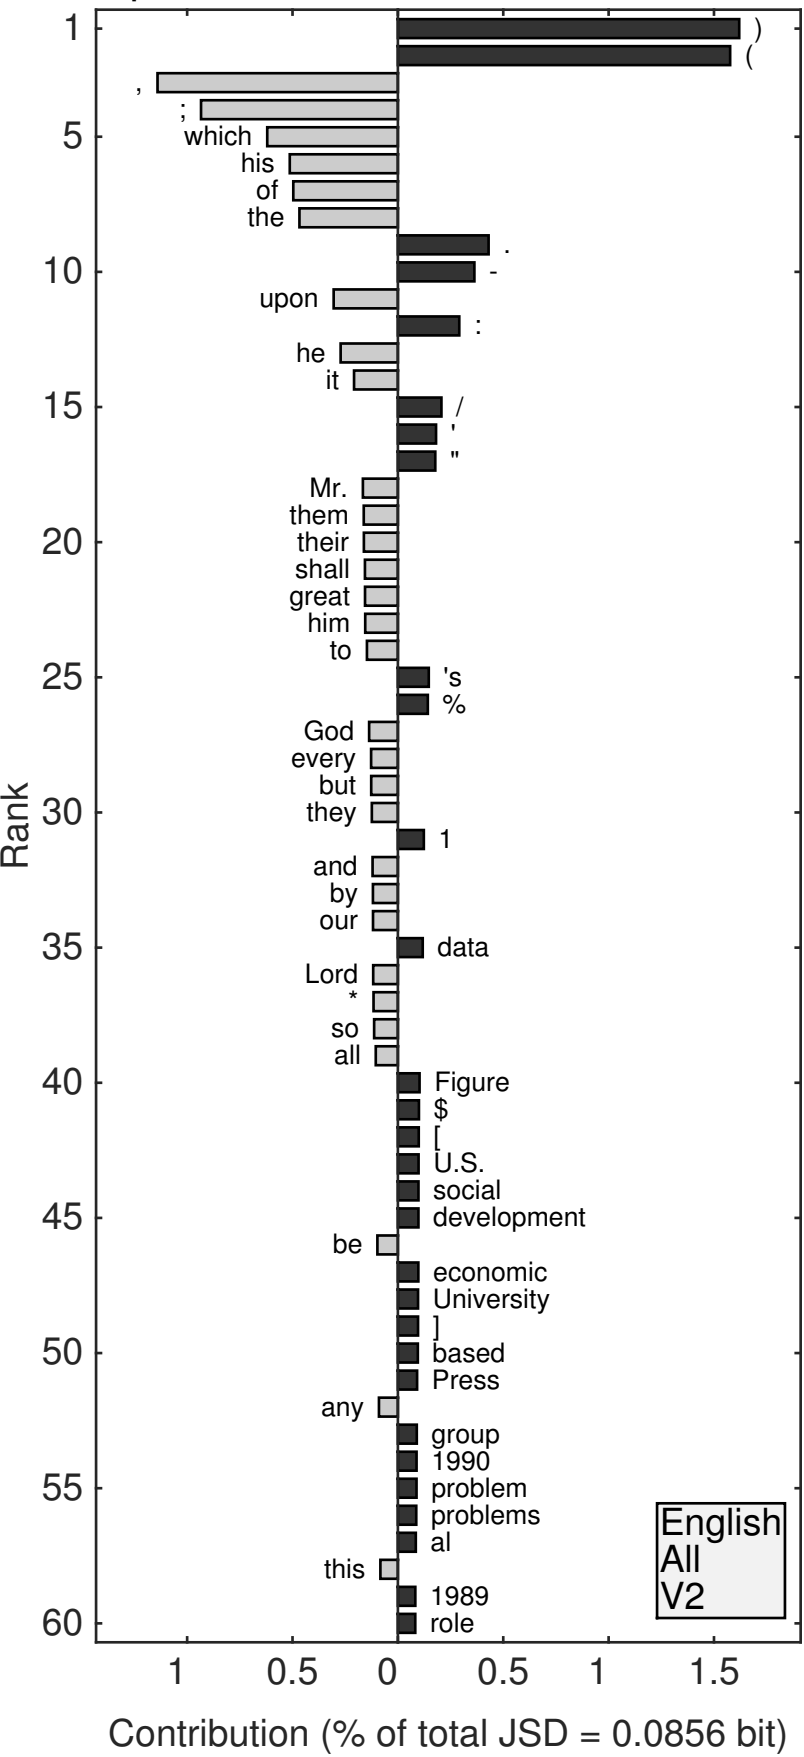

# Top JSD contributions: 1840s to 1850s

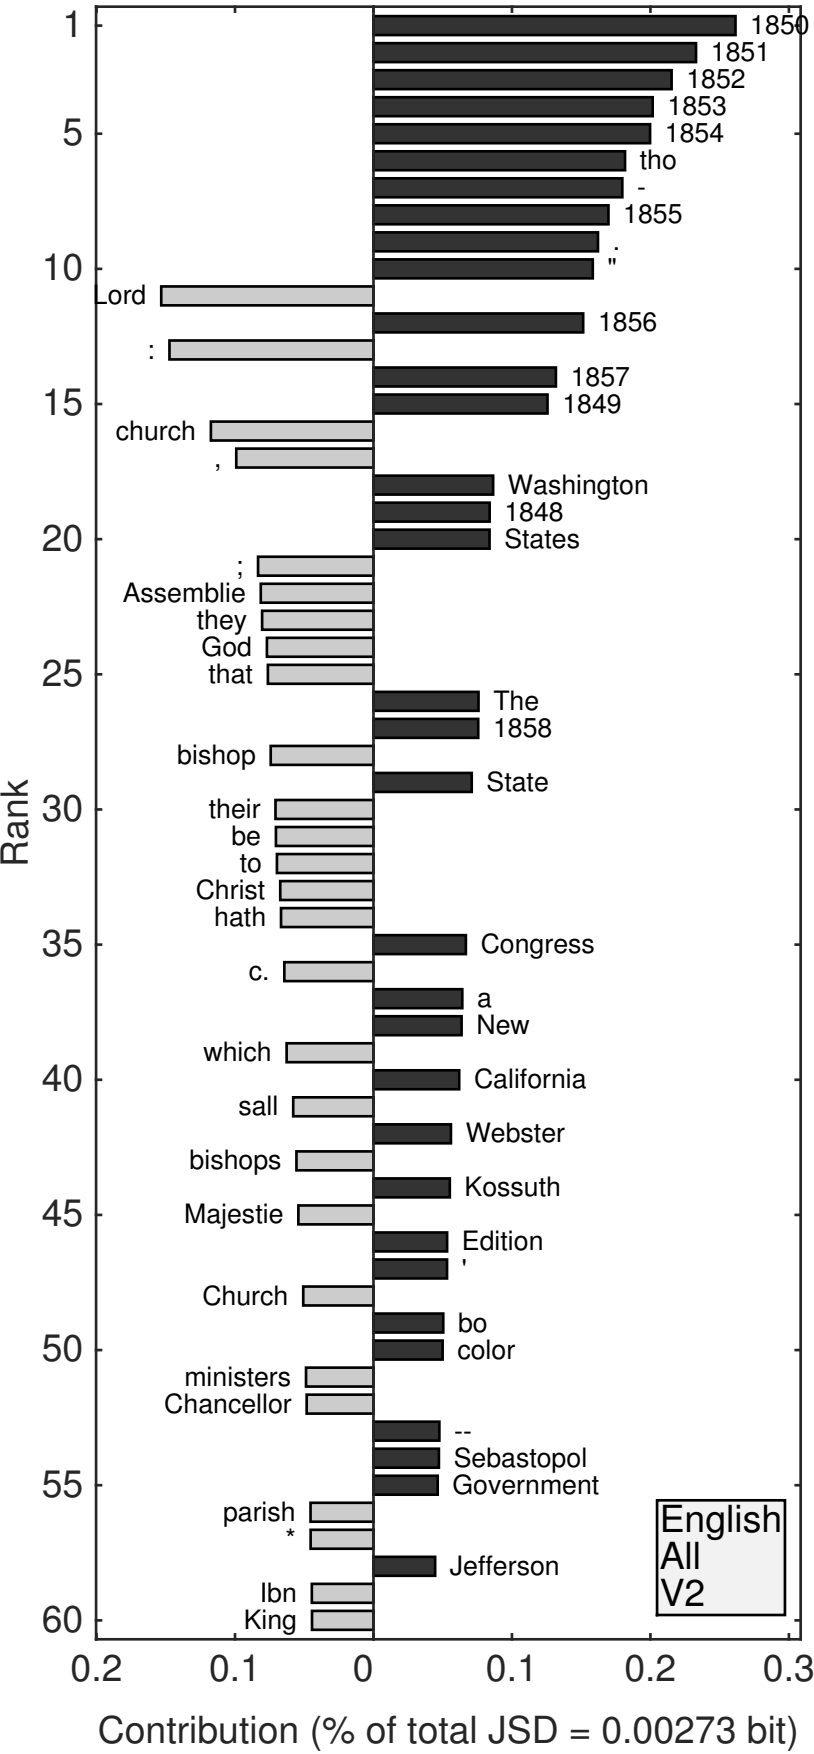

# Top JSD contributions: 1840s to 1860s

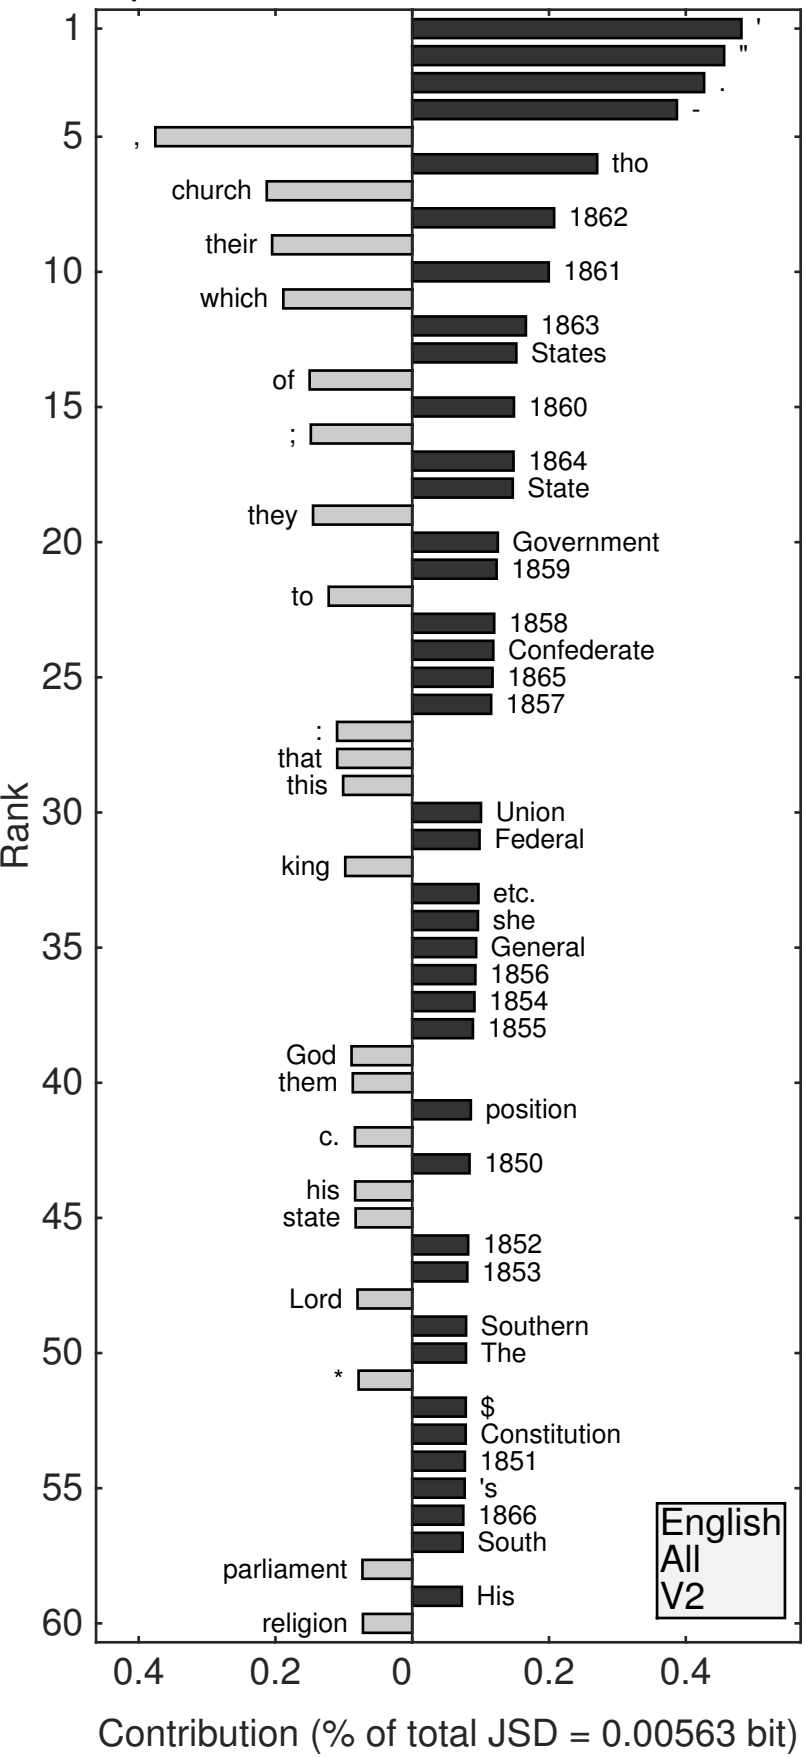



# Top JSD contributions: 1840s to 1870s

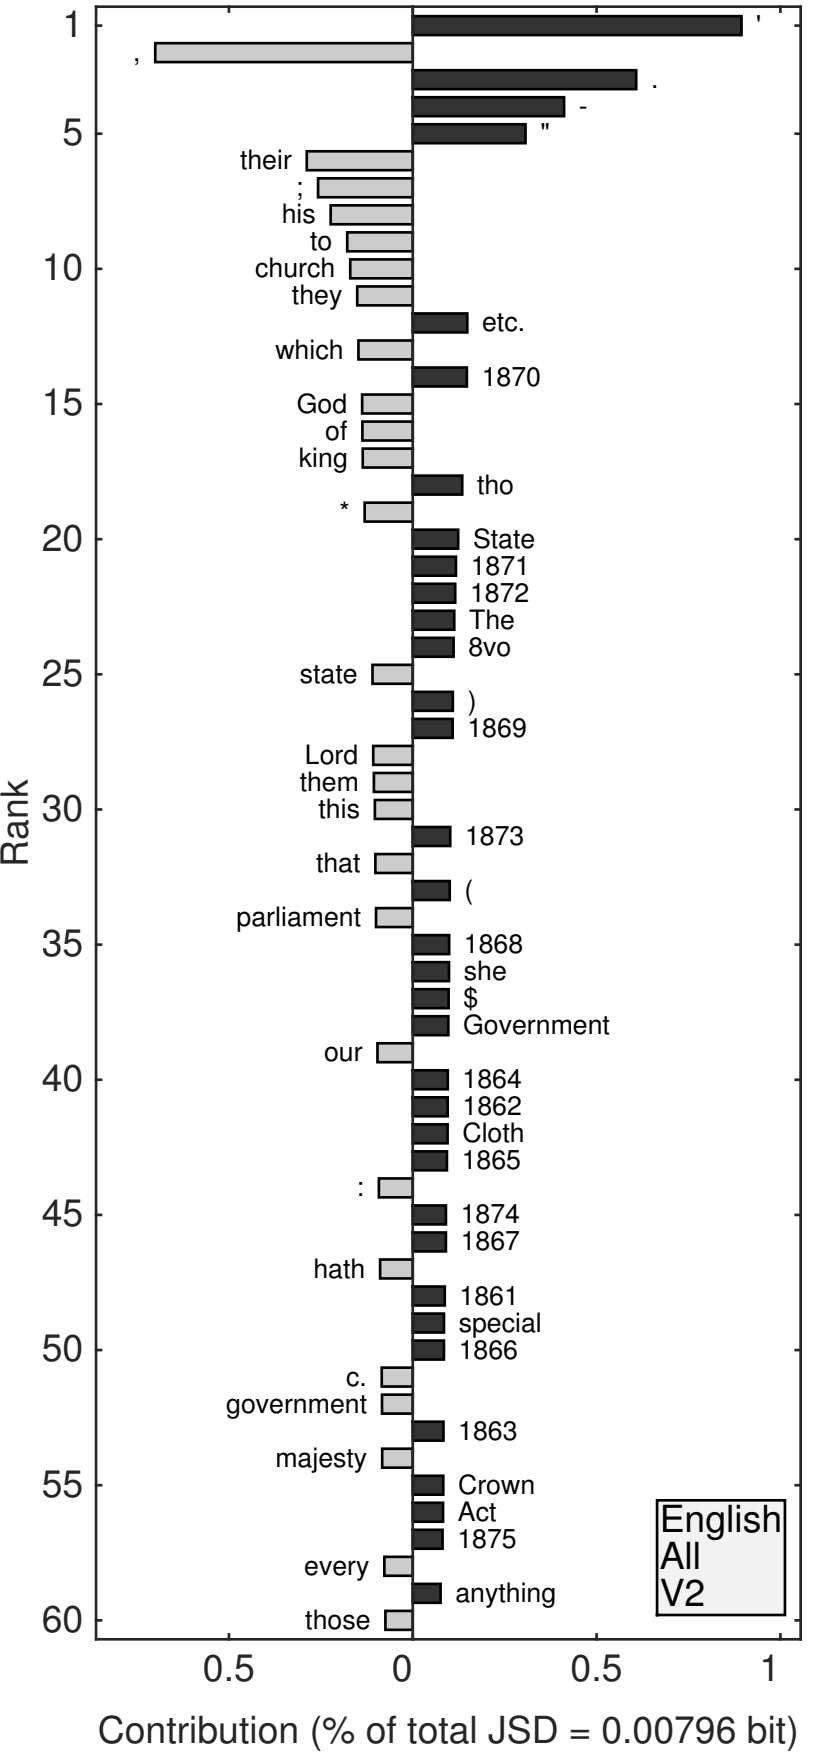

# Top JSD contributions: 1840s to 1880s

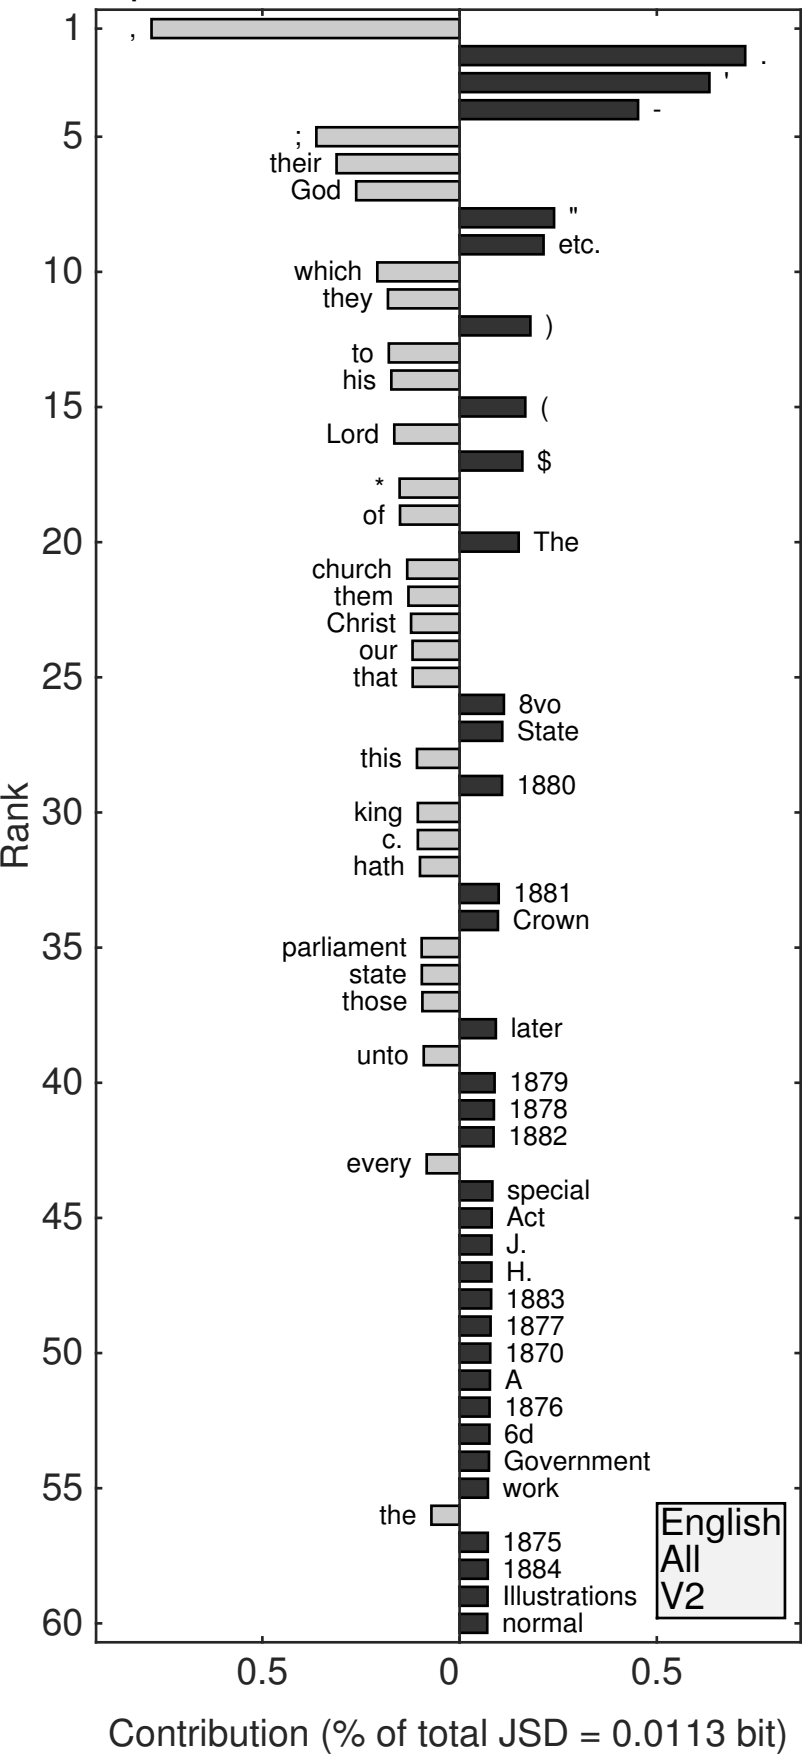

# Top JSD contributions: 1840s to 1890s

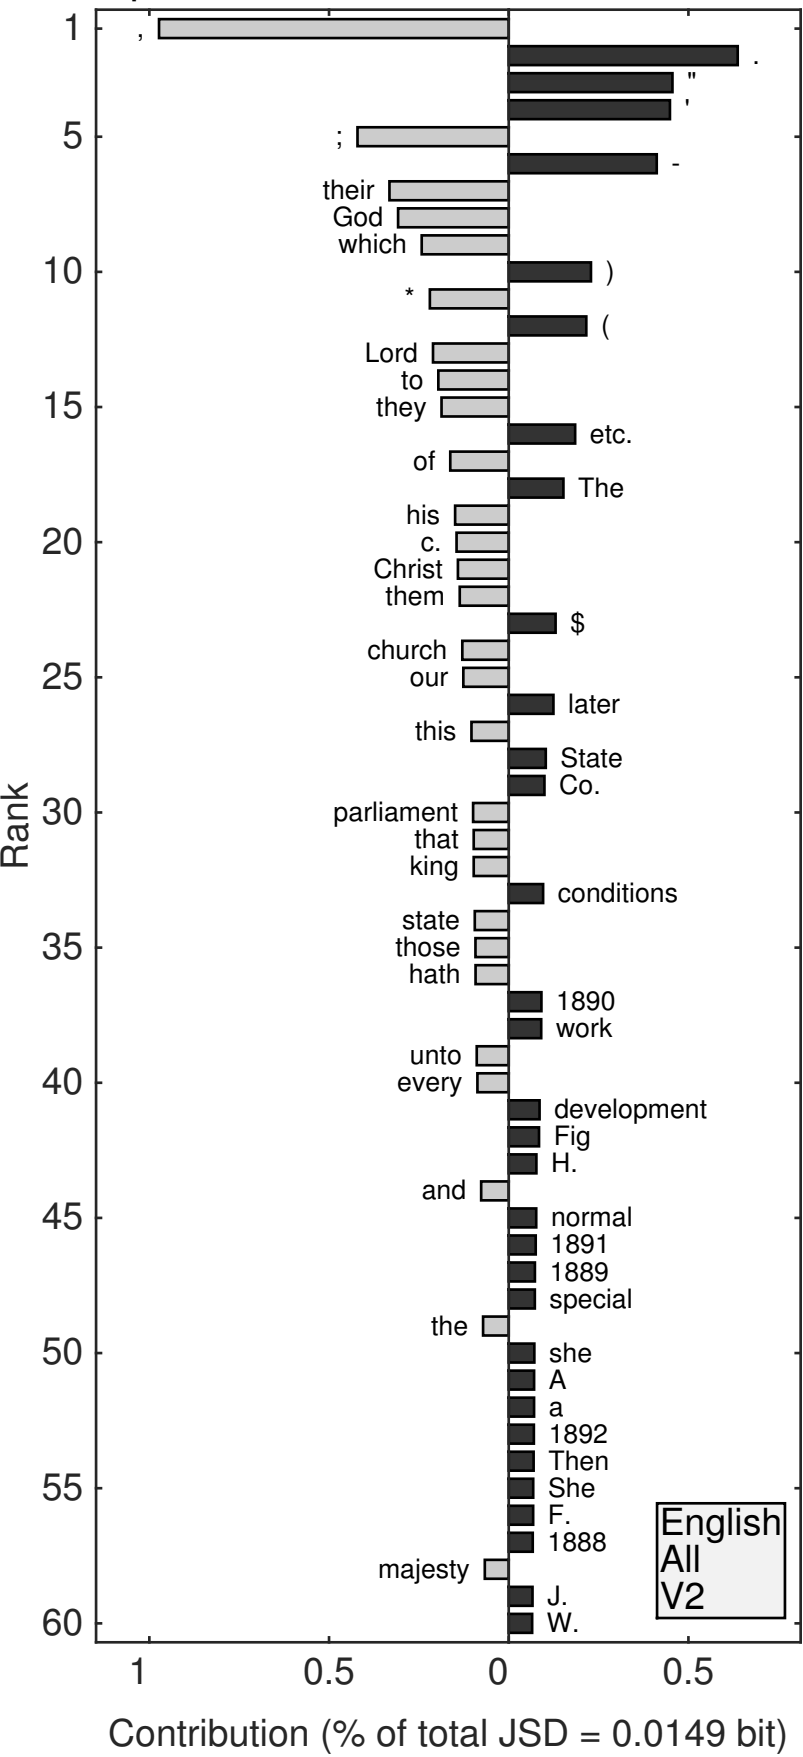

# Top JSD contributions: 1840s to 1900s

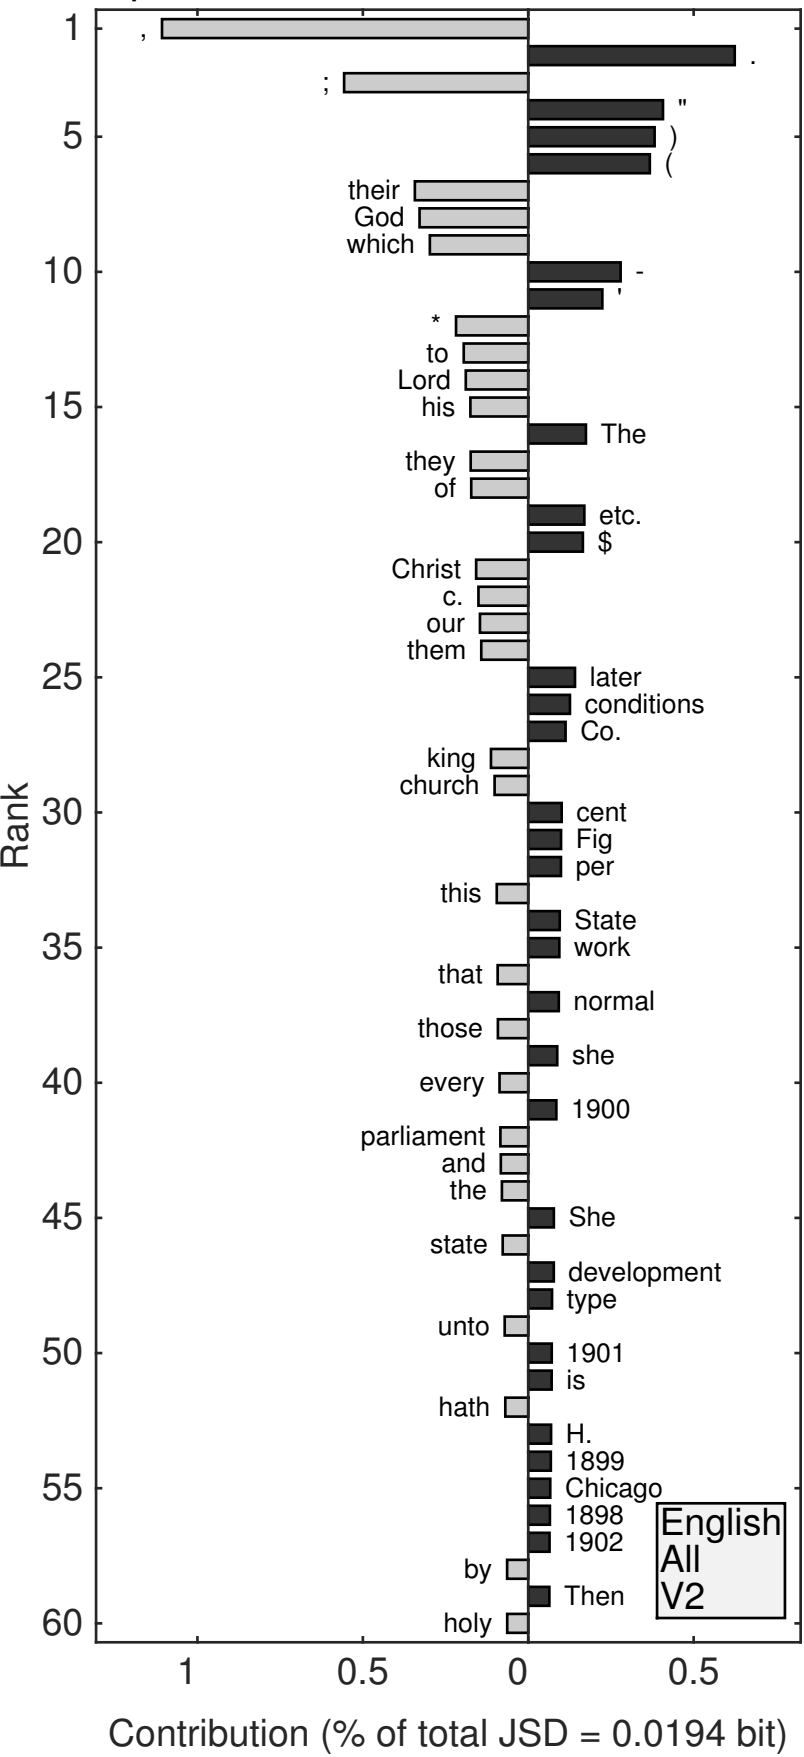

# Top JSD contributions: 1840s to 1910s

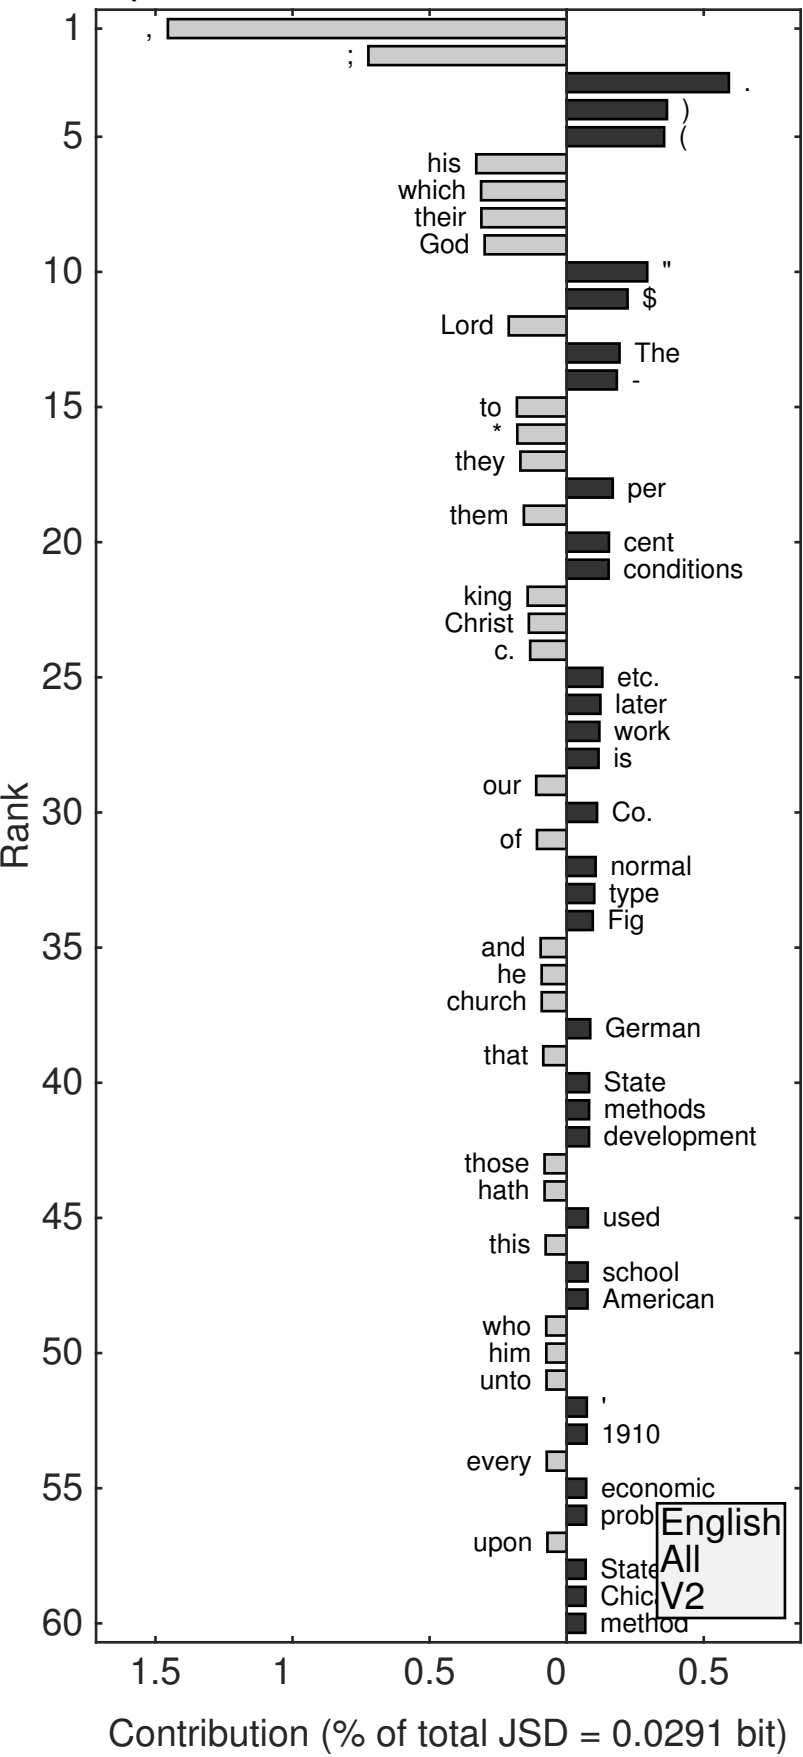

# Top JSD contributions: 1840s to 1920s

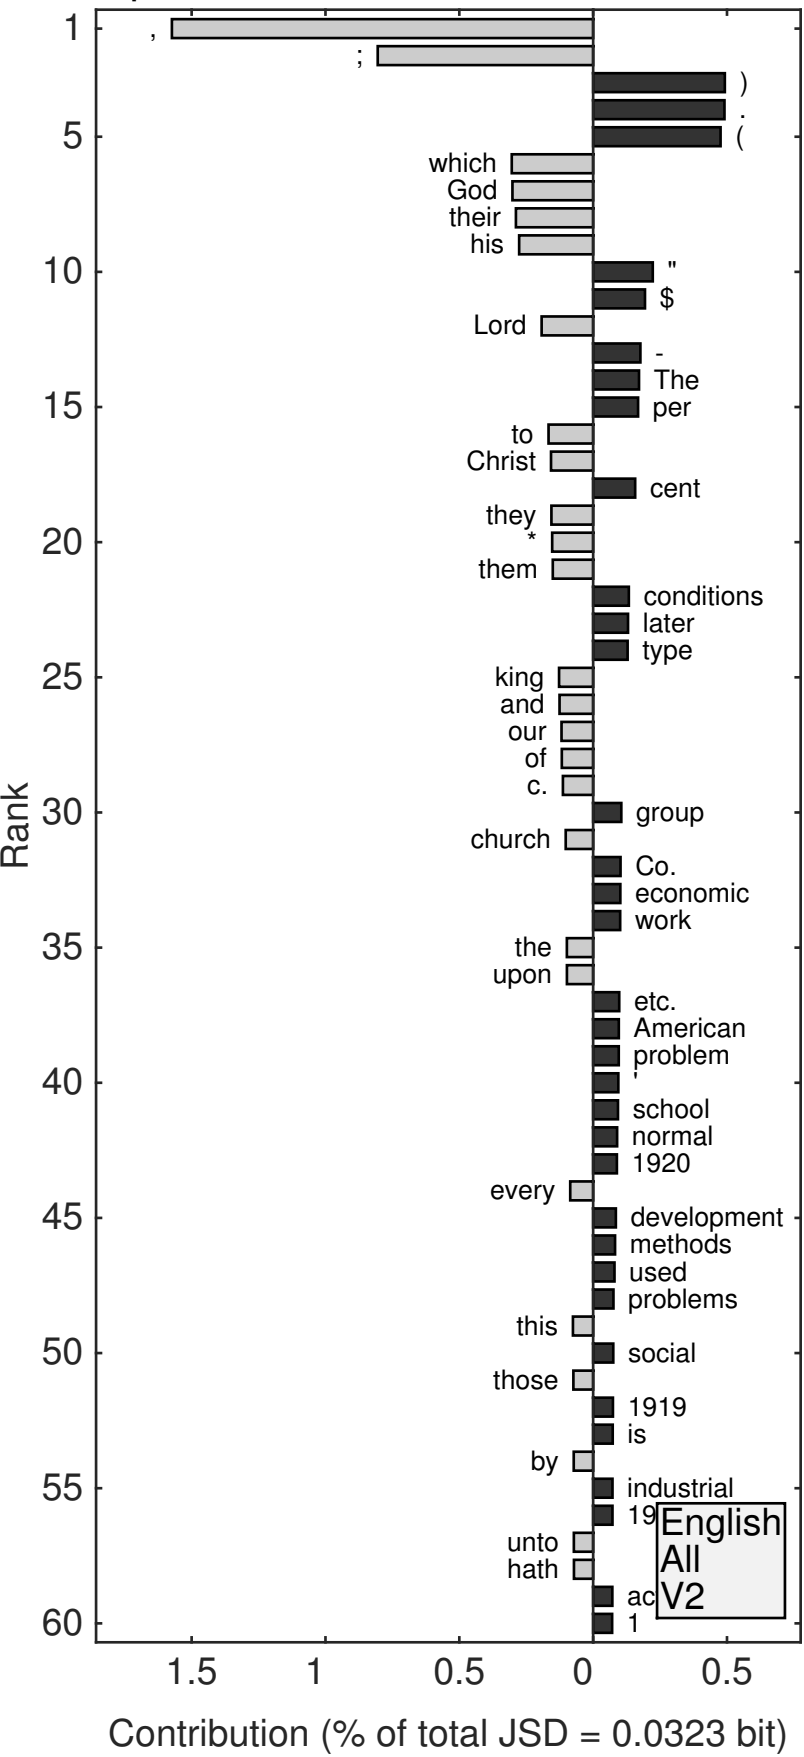

# Top JSD contributions: 1840s to 1930s

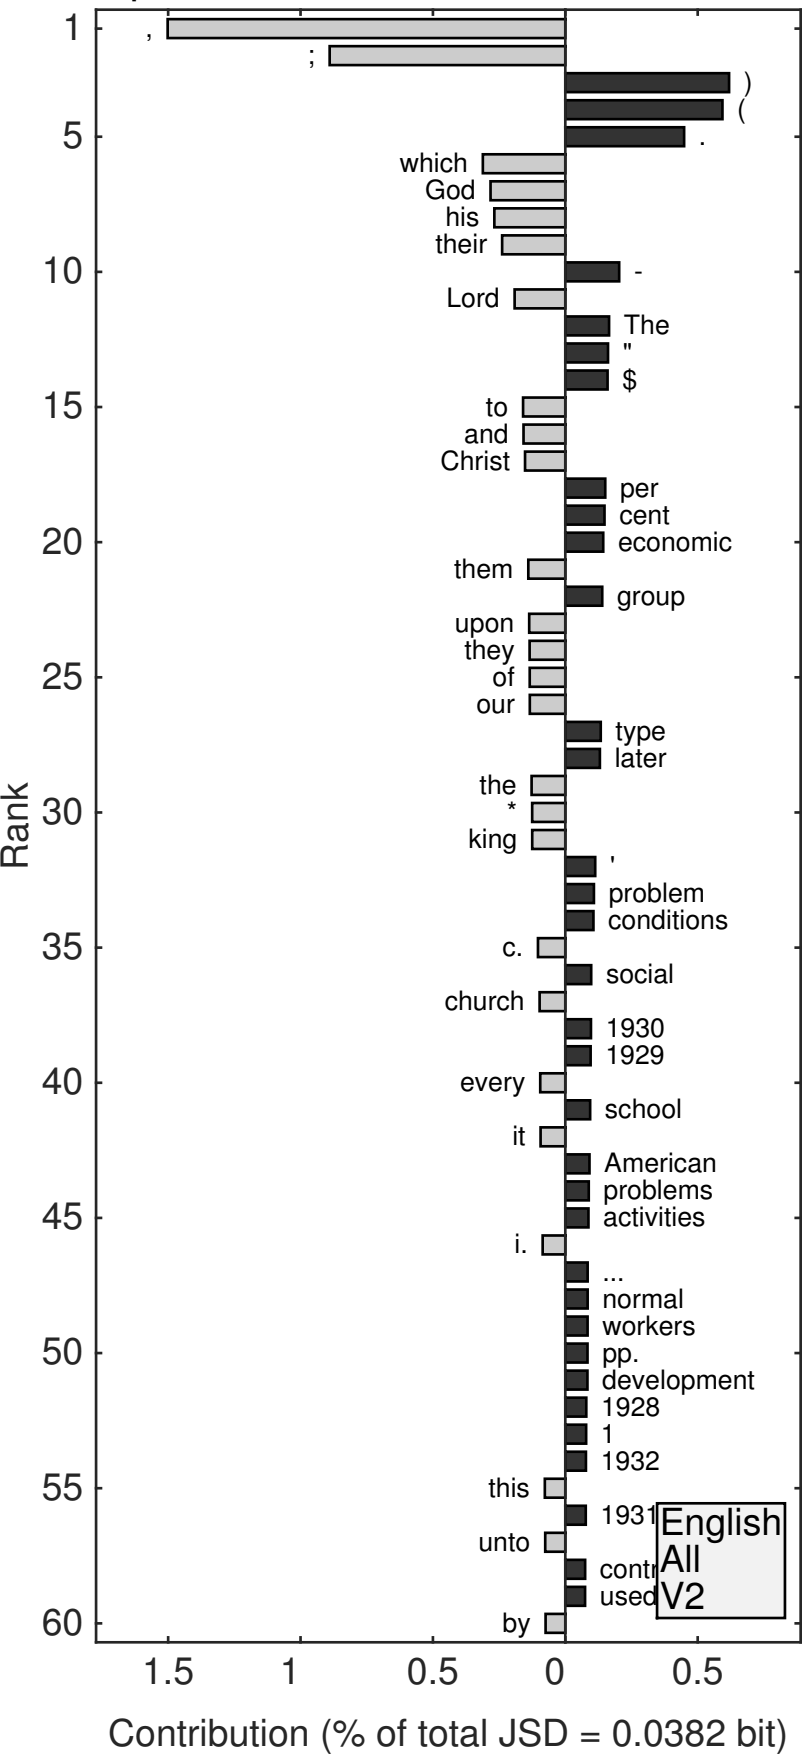

# Top JSD contributions: 1840s to 1940s

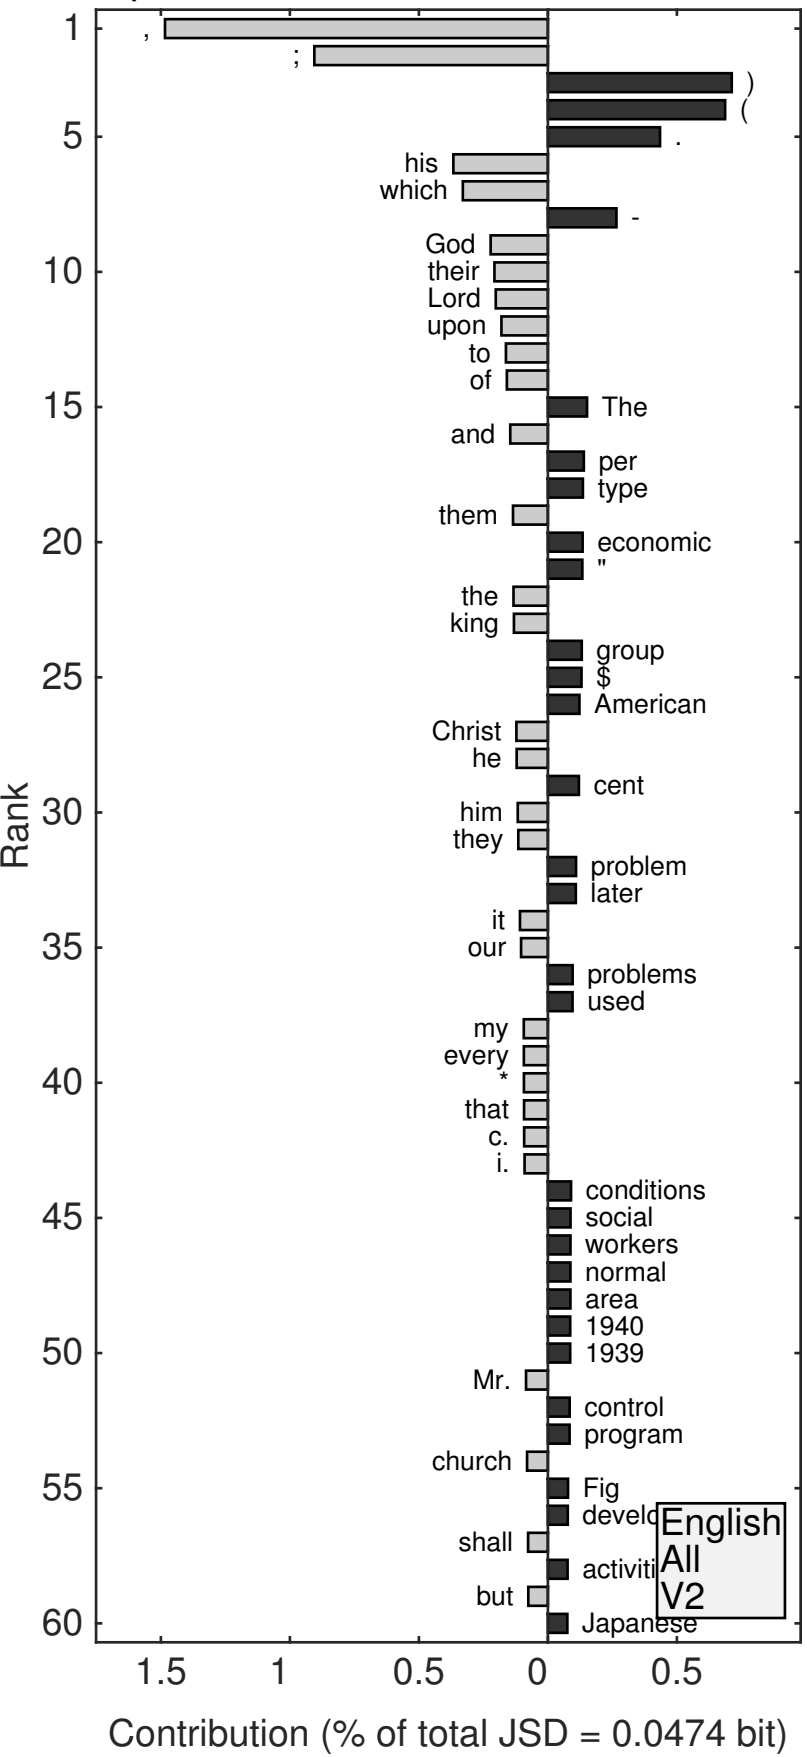



# Top JSD contributions: 1840s to 1950s

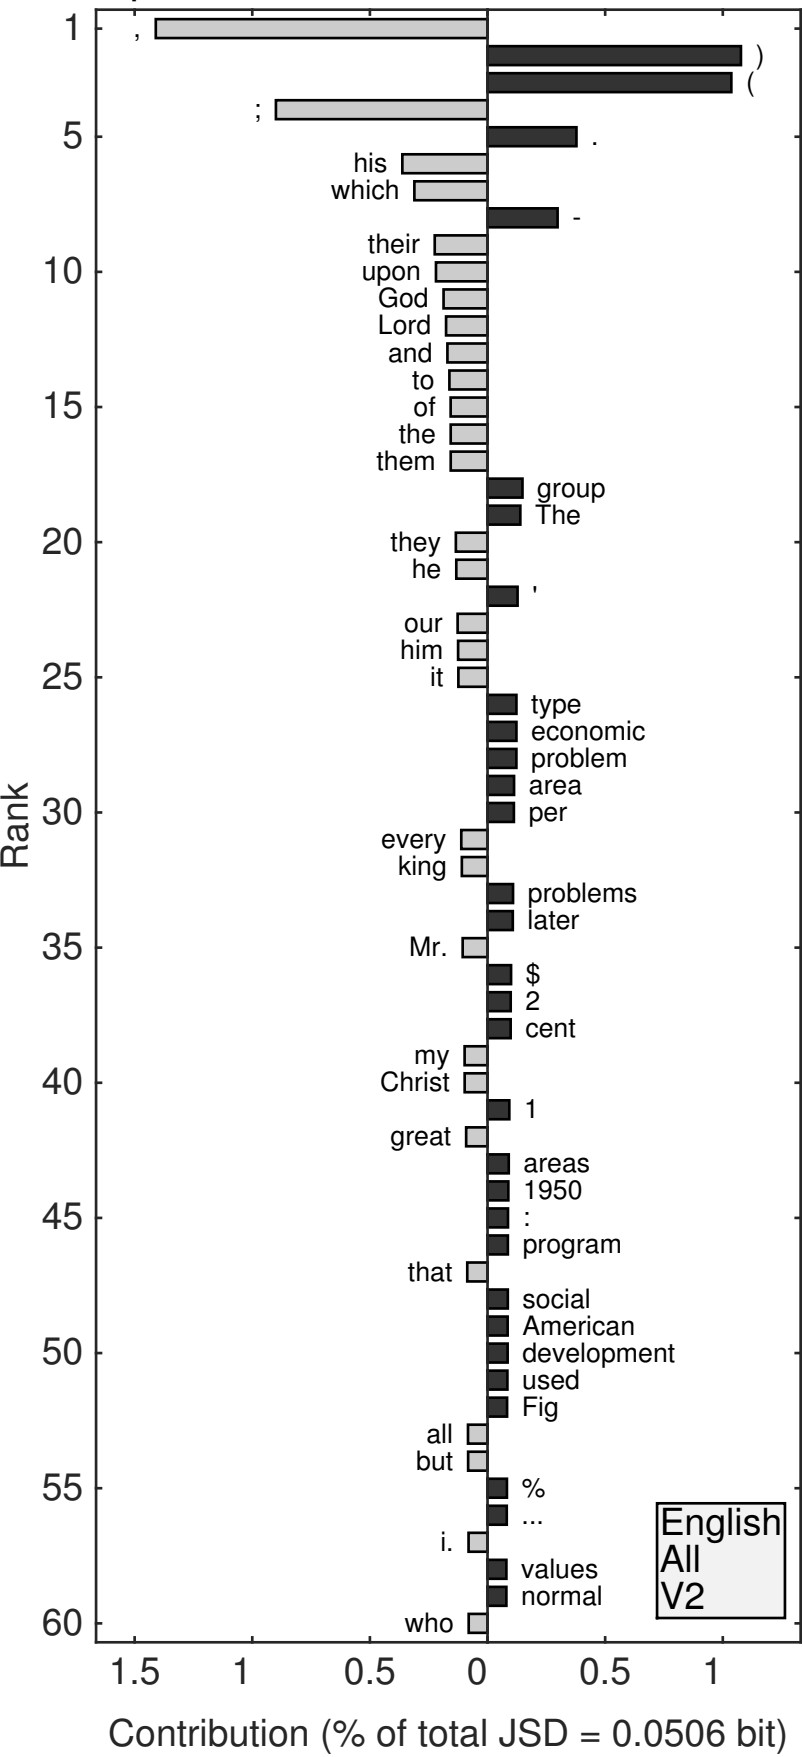

# Top JSD contributions: 1840s to 1960s

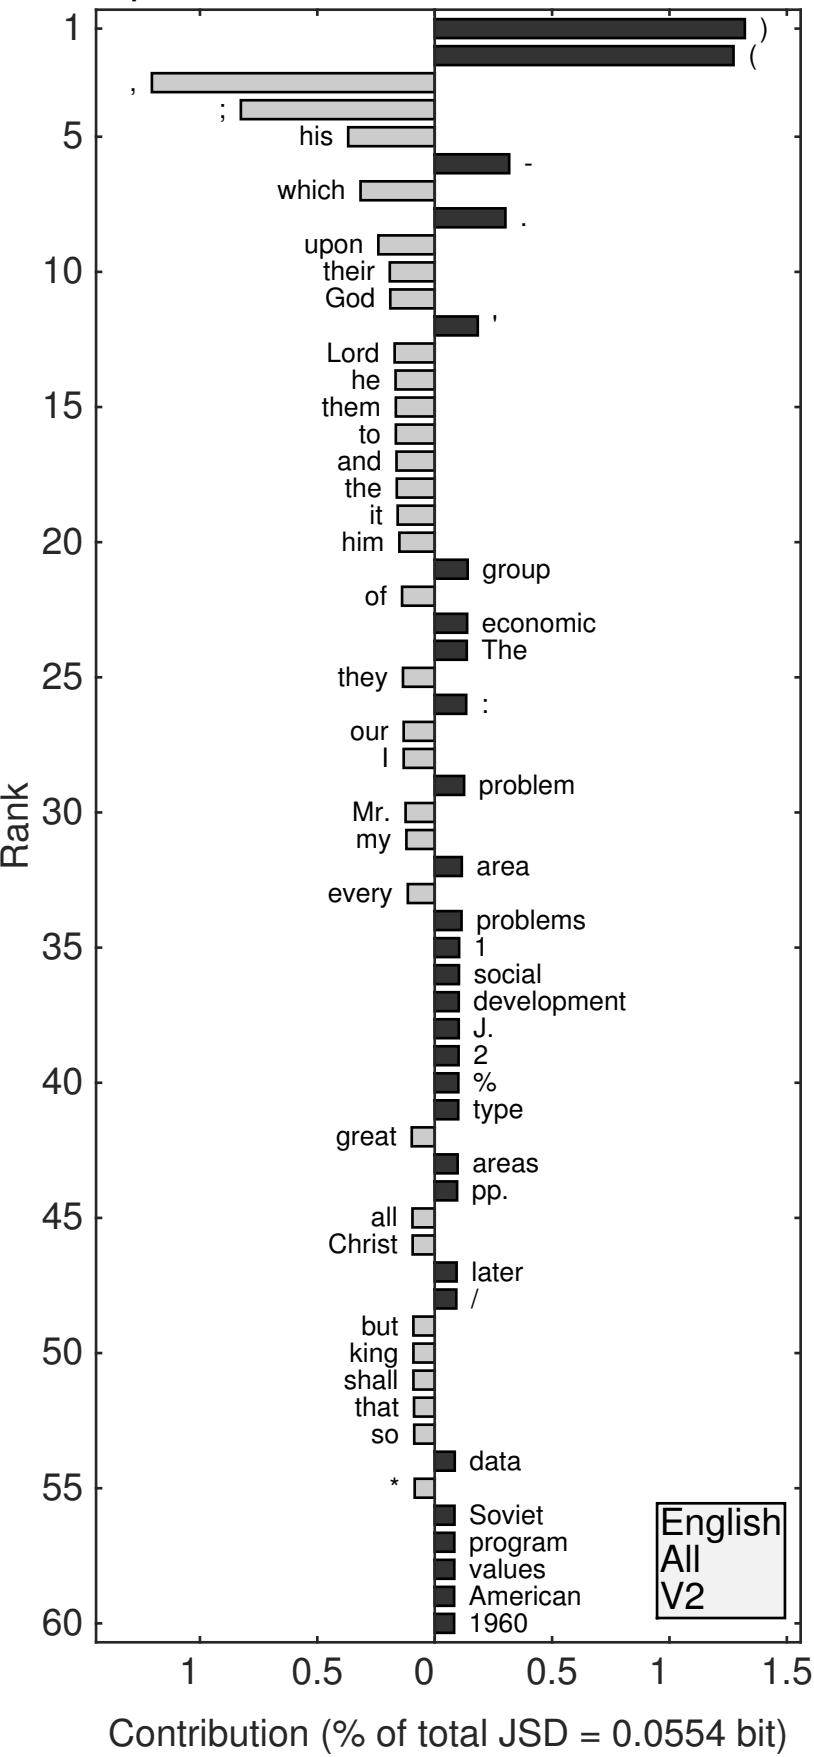

# Top JSD contributions: 1840s to 1970s

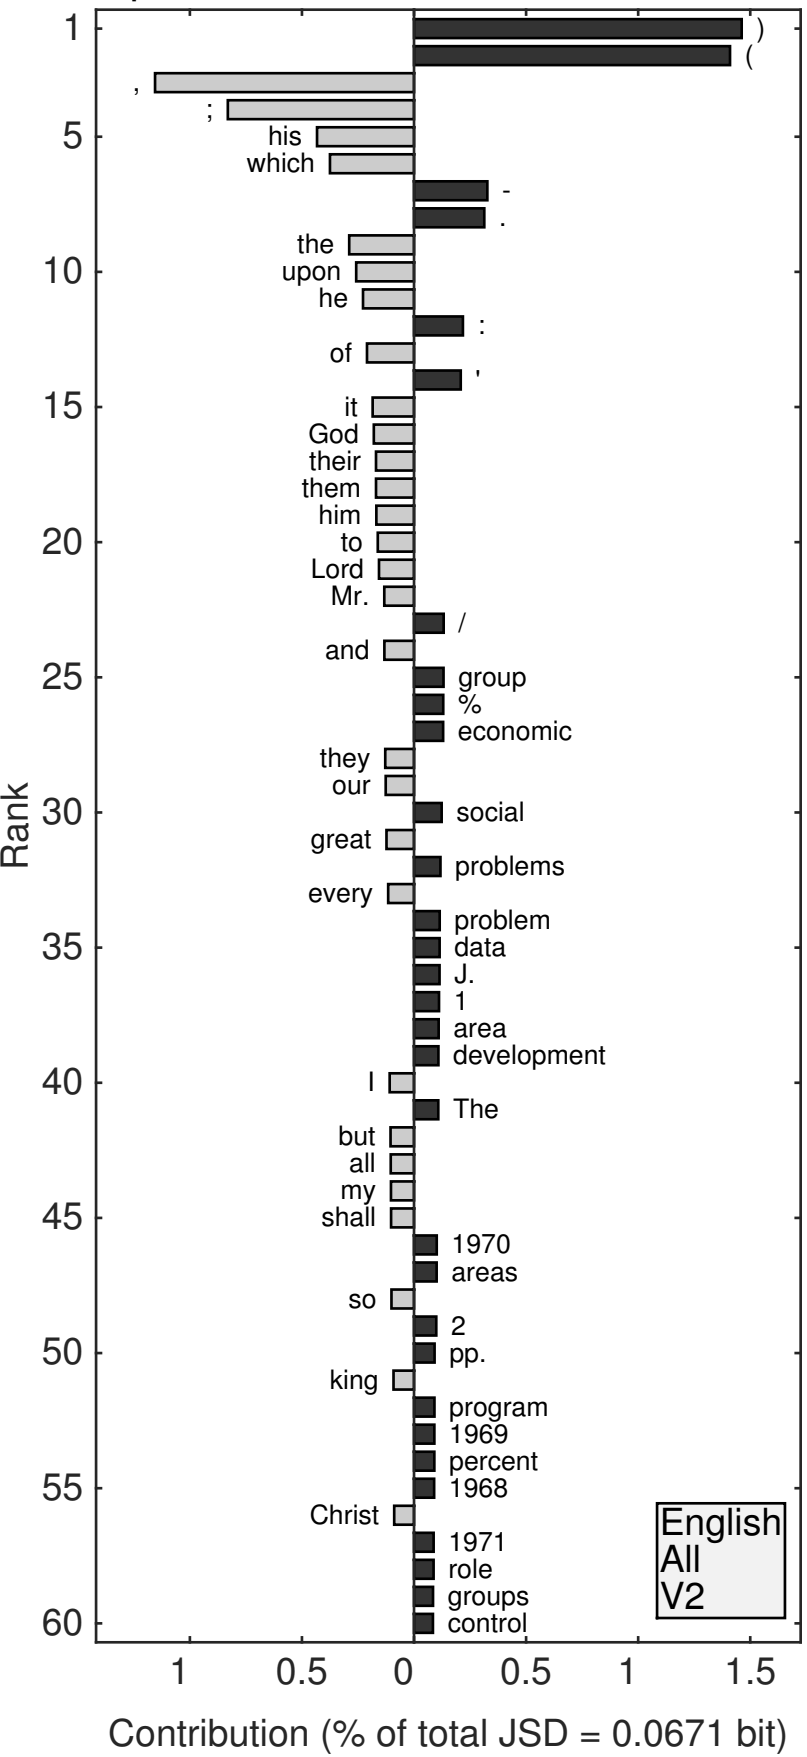

# Top JSD contributions: 1840s to 1980s

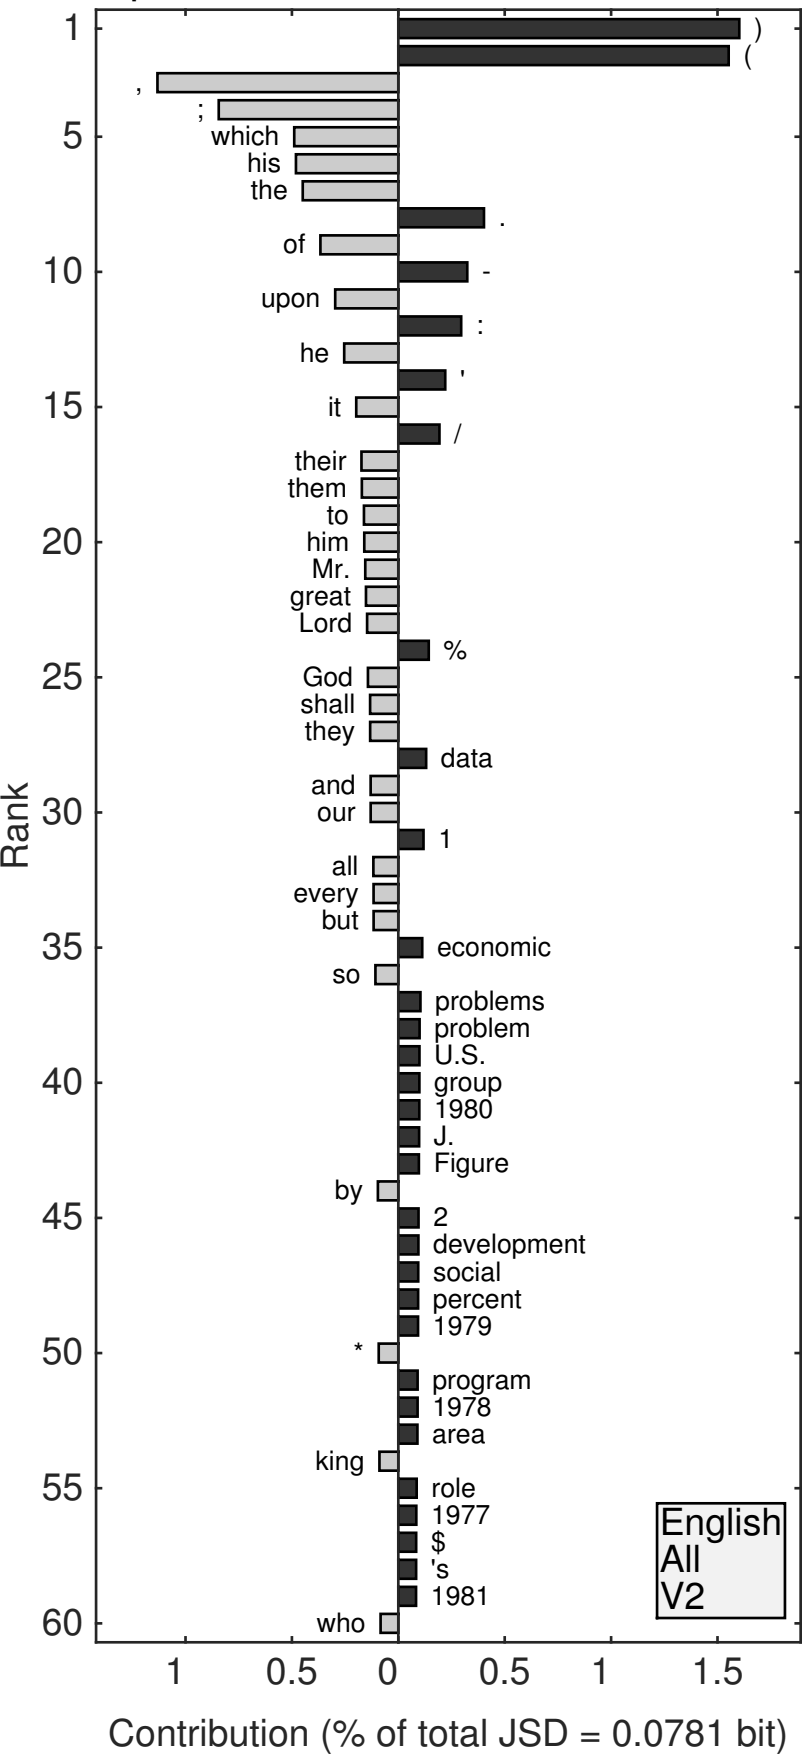

# Top JSD contributions: 1840s to 1990s

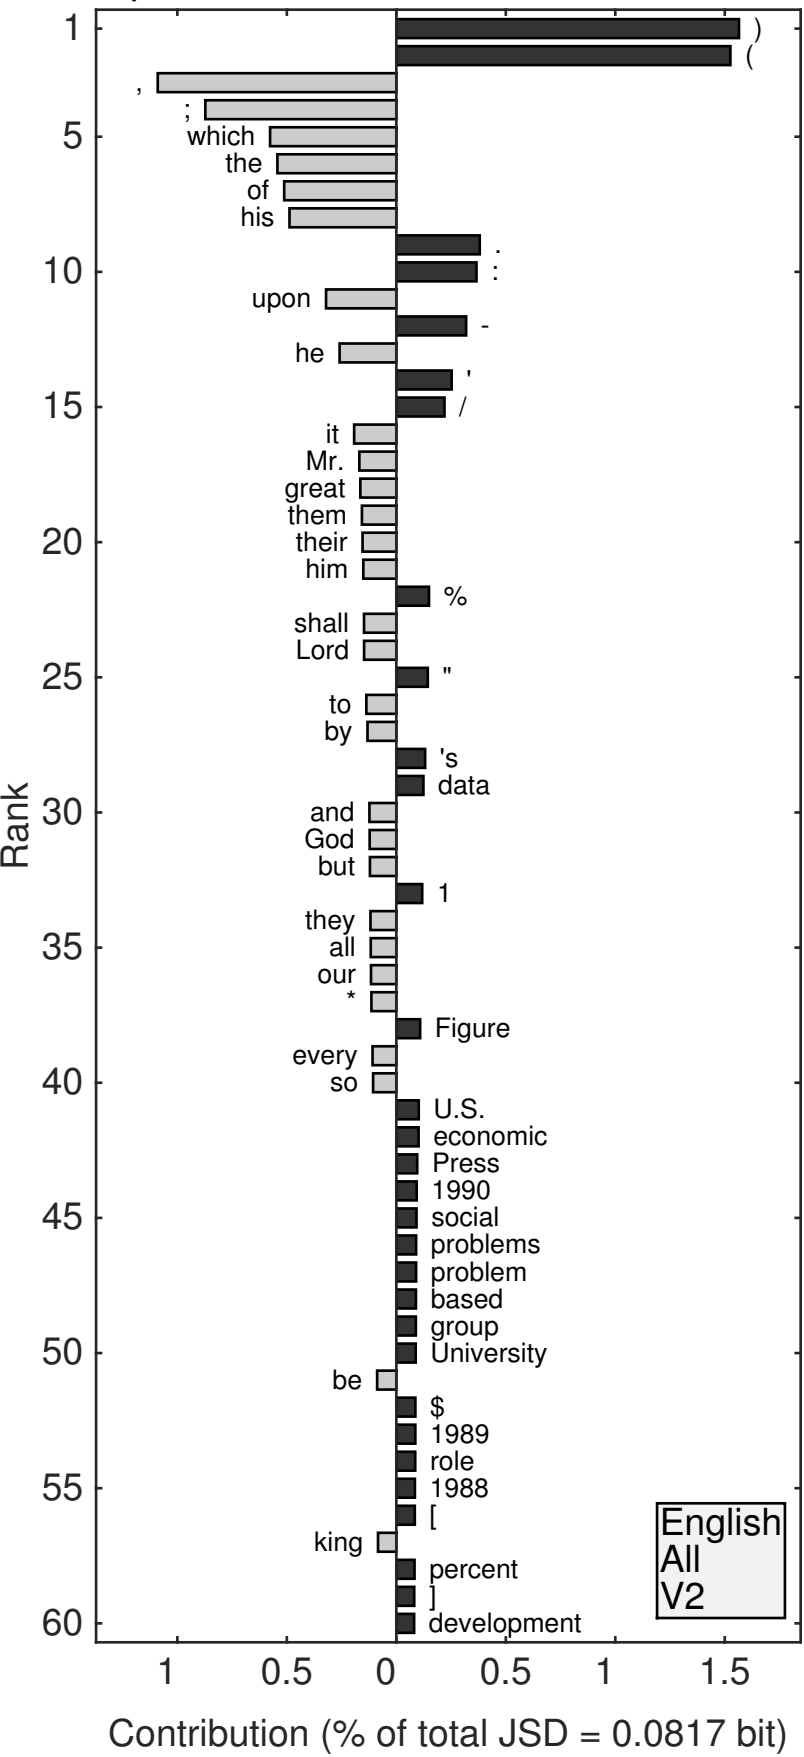

# Top JSD contributions: 1850s to 1860s

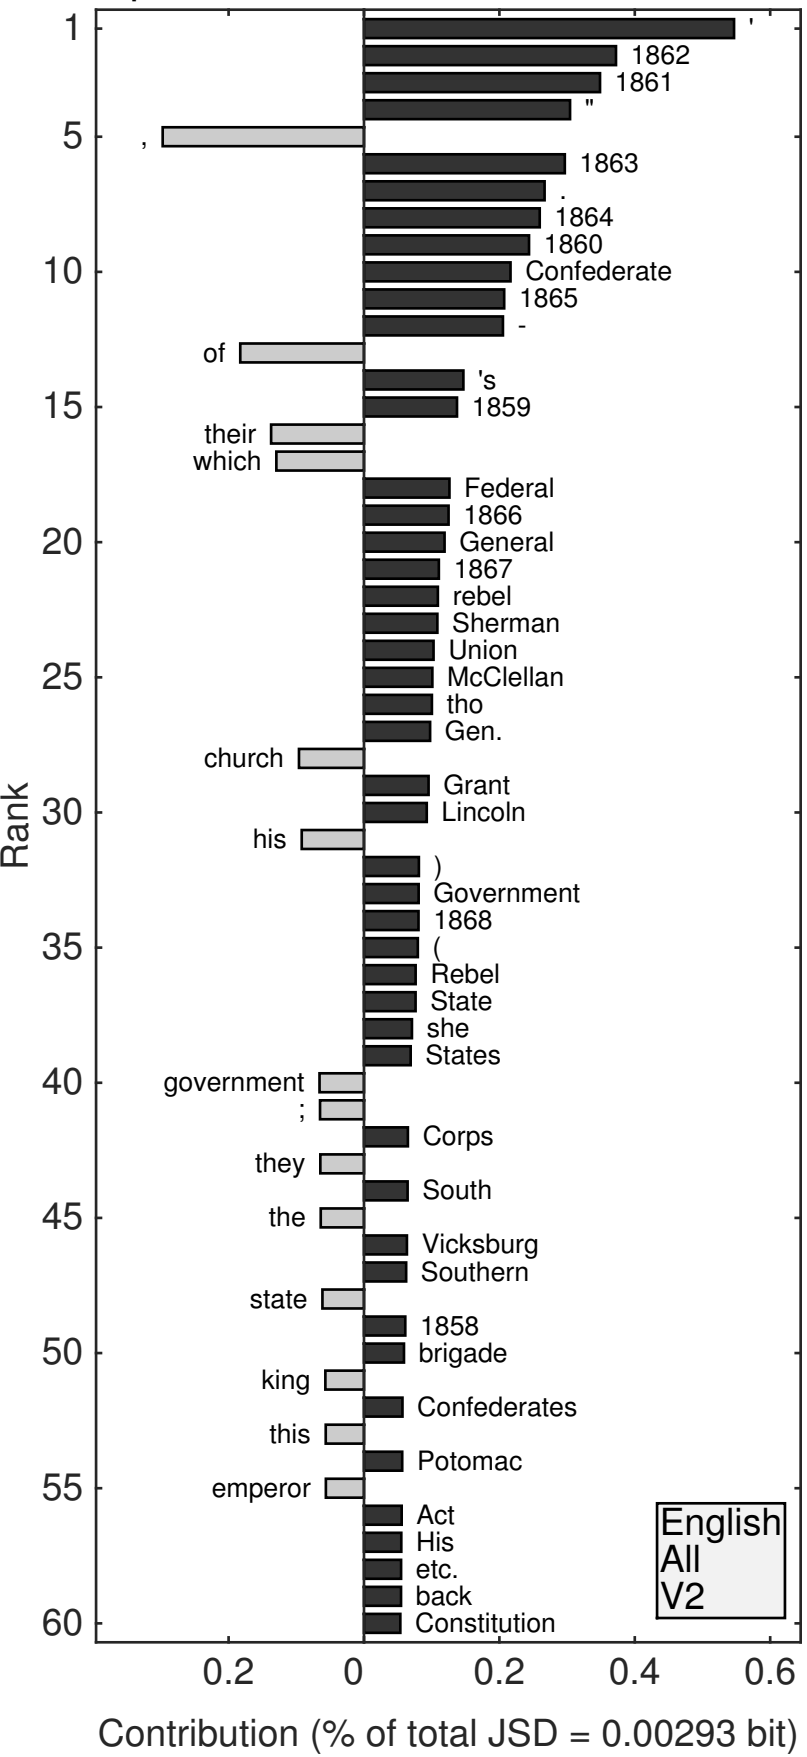

# Top JSD contributions: 1850s to 1870s

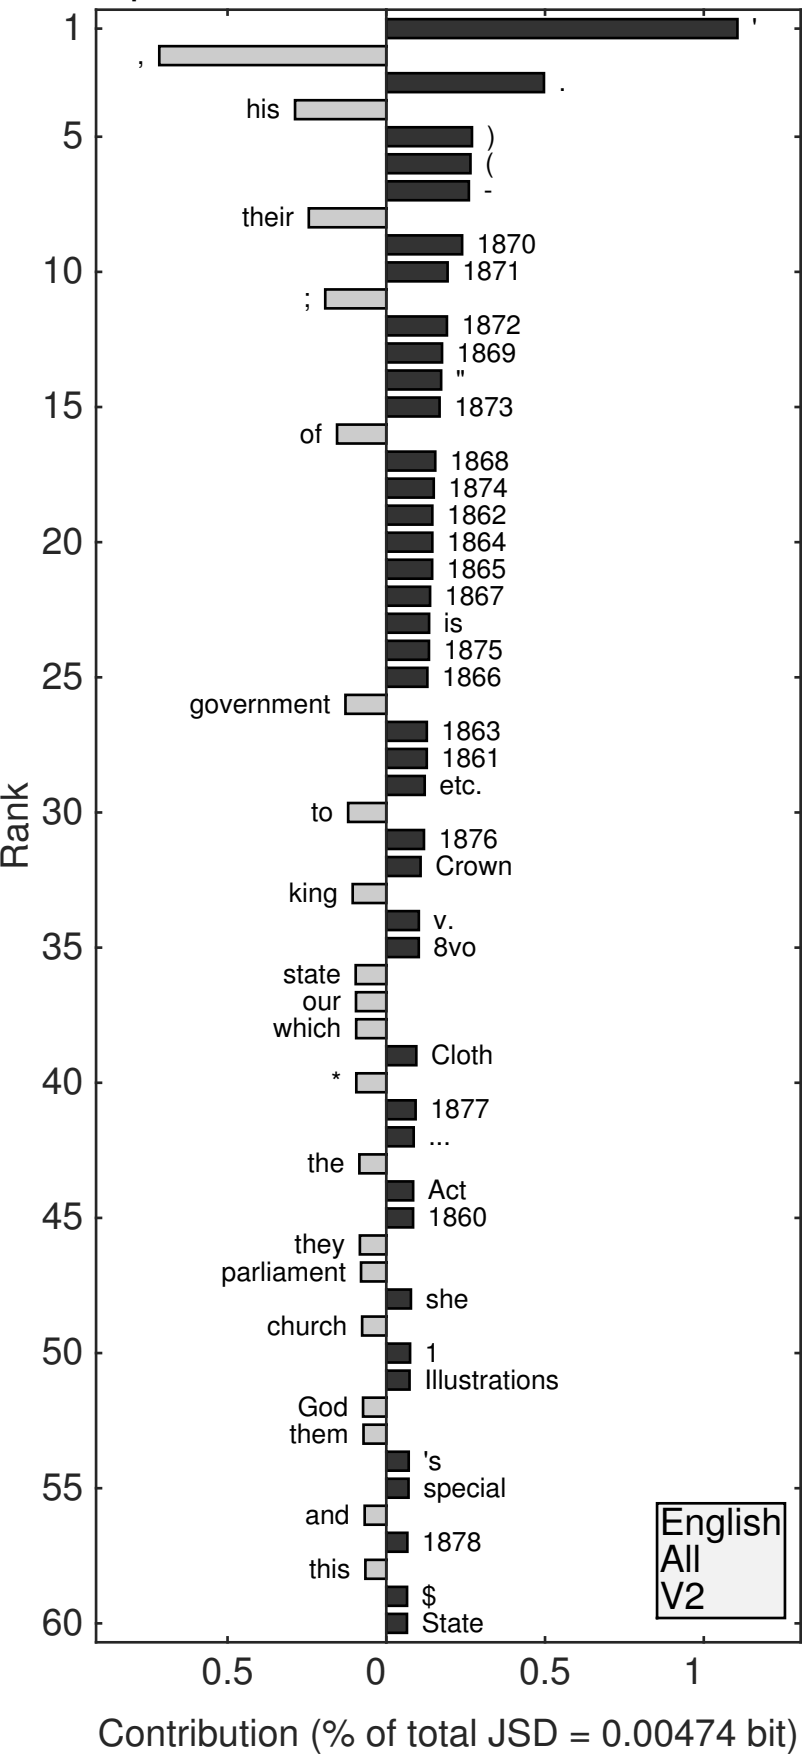

# Top JSD contributions: 1850s to 1880s

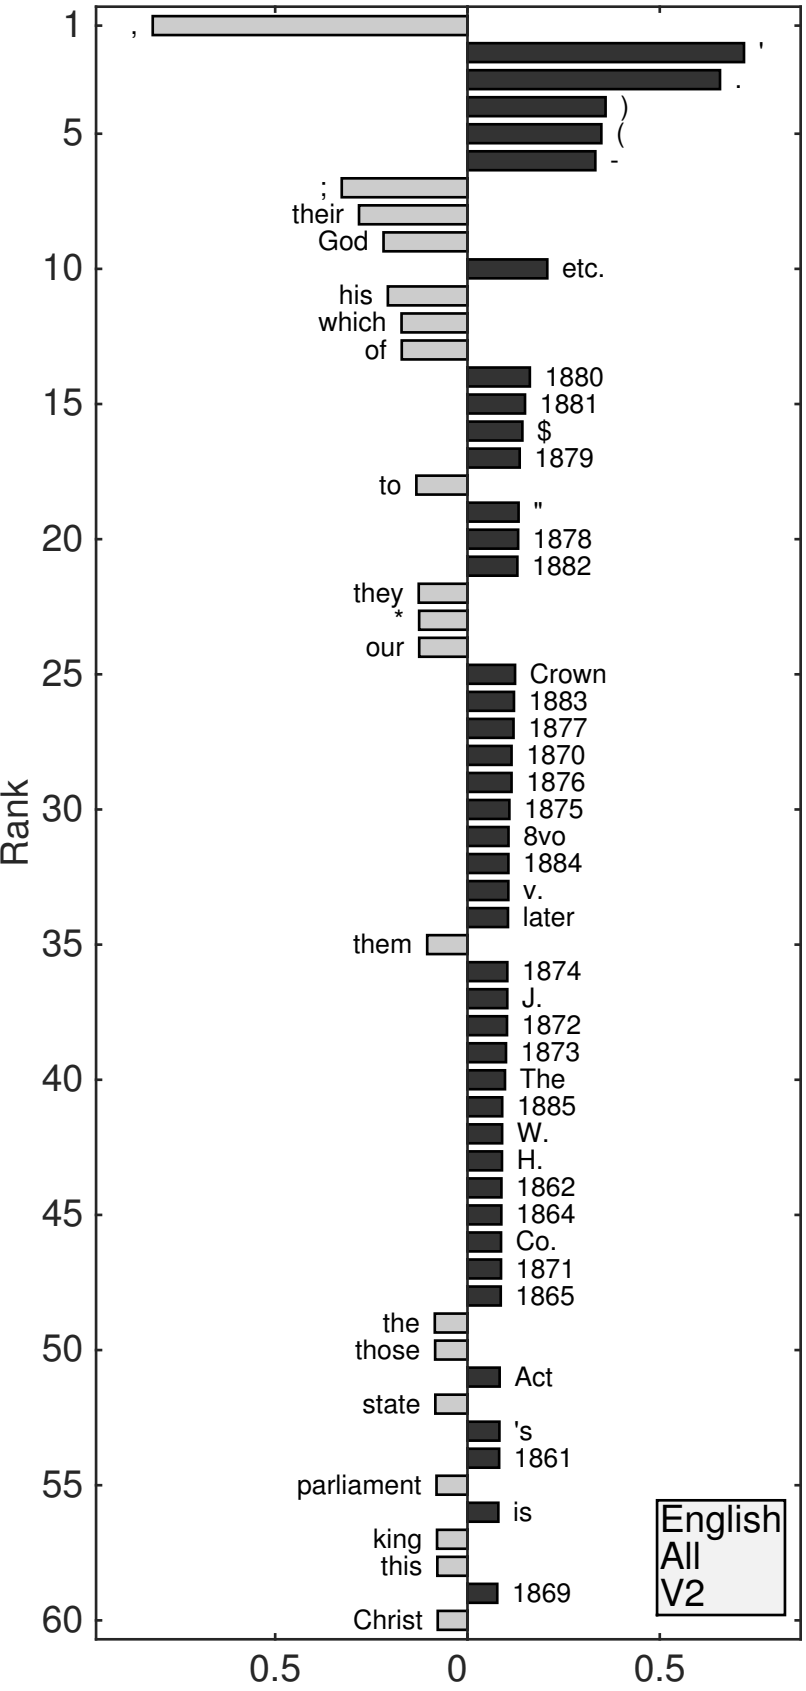

Contribution (% of total JSD = 0.00733 bit)



# Top JSD contributions: 1850s to 1890s

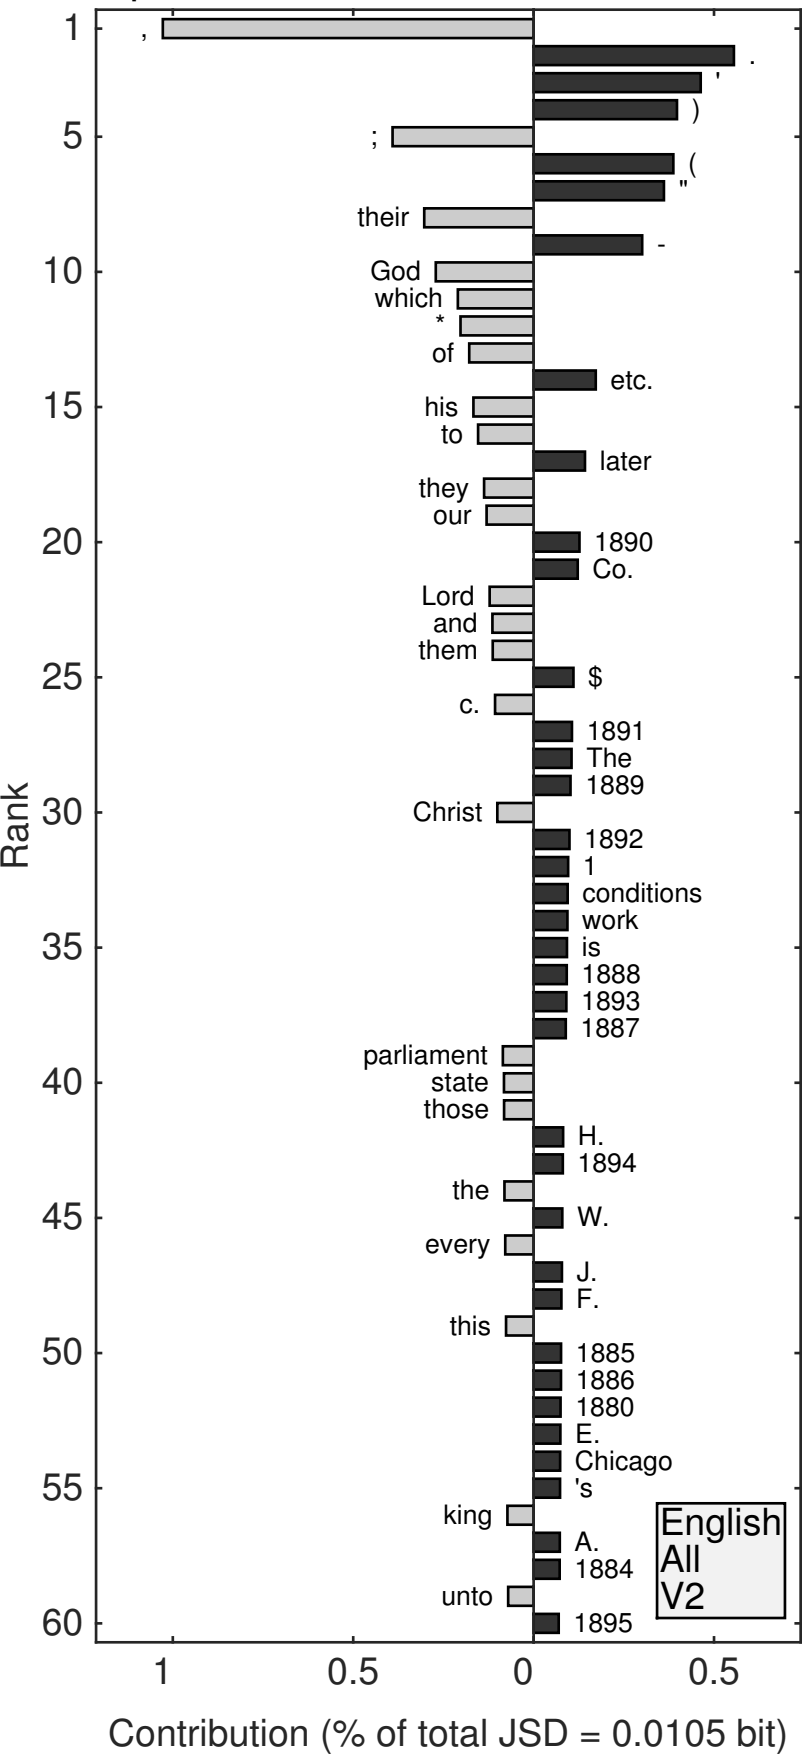

English  
All  
V2

Contribution (% of total JSD = 0.0105 bit)

# Top JSD contributions: 1850s to 1900s

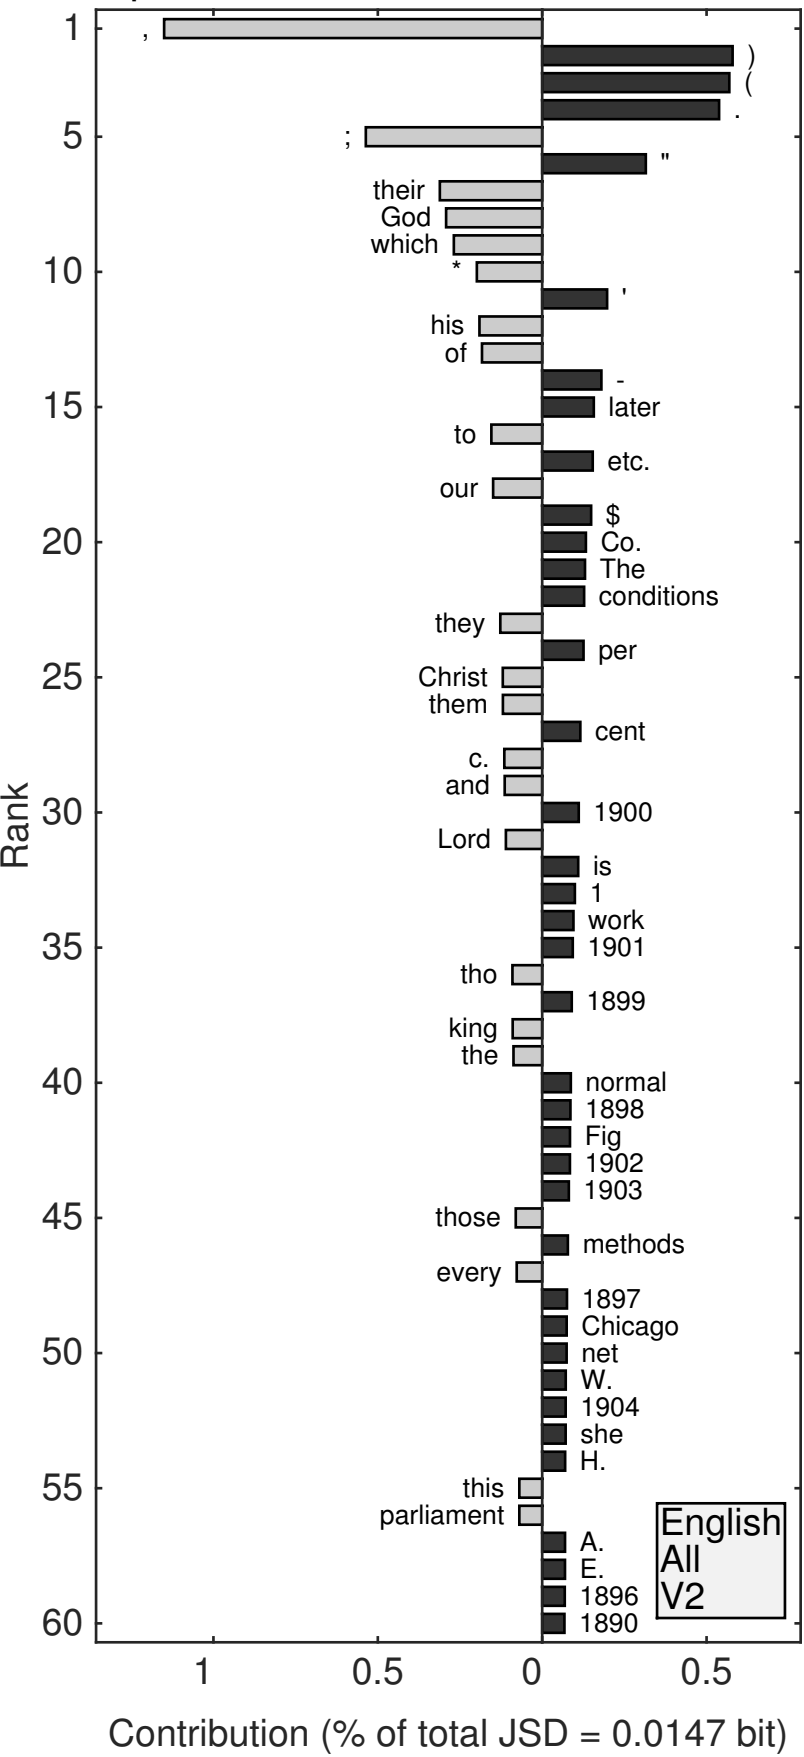

# Top JSD contributions: 1850s to 1910s

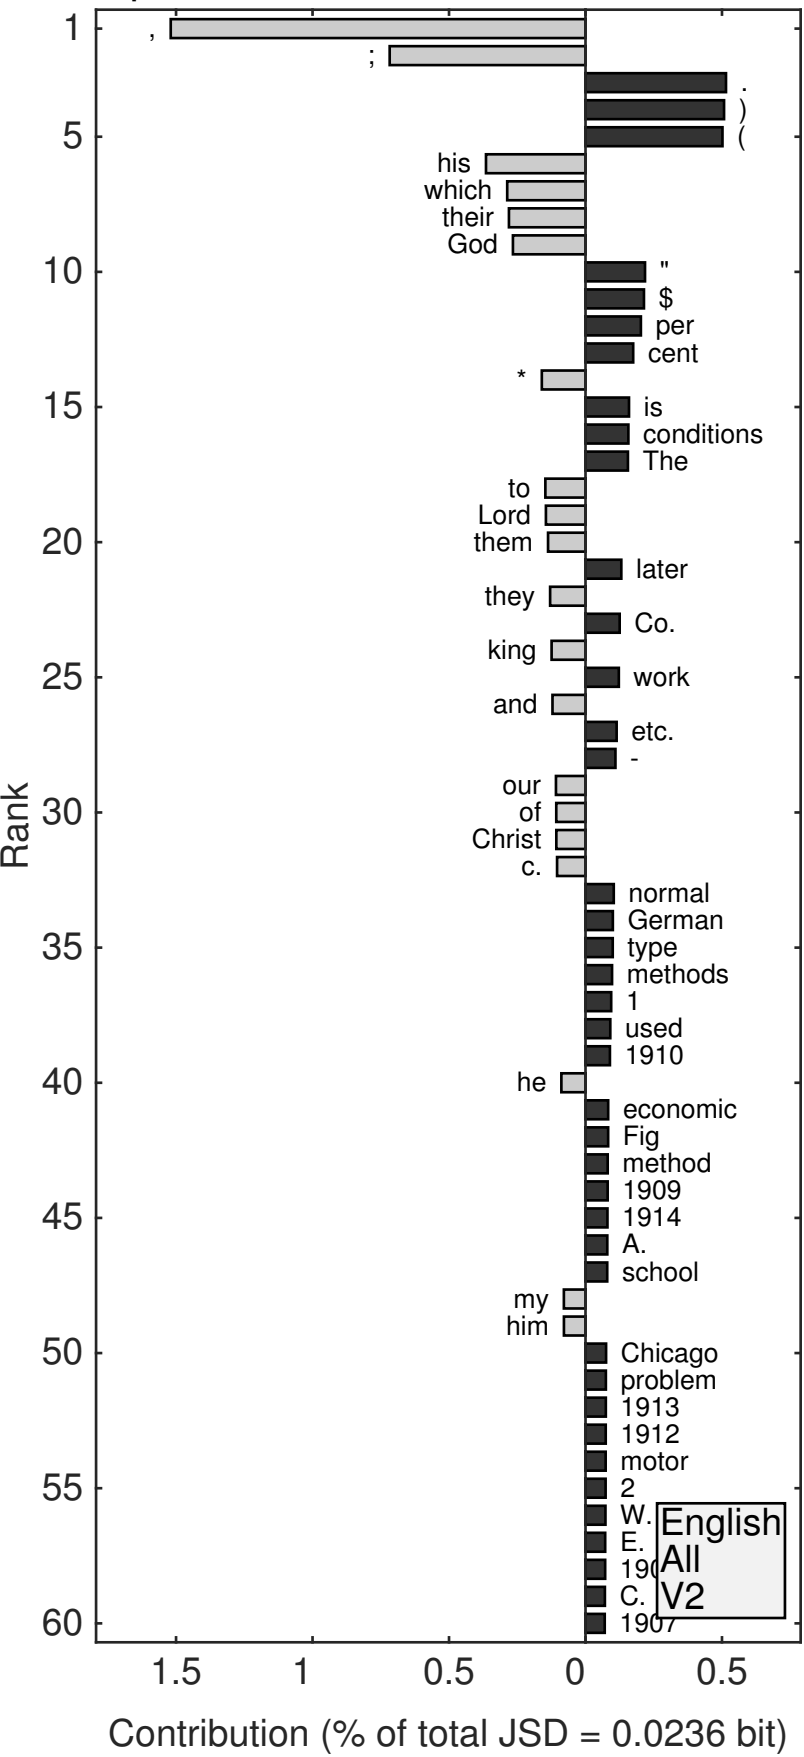

# Top JSD contributions: 1850s to 1920s

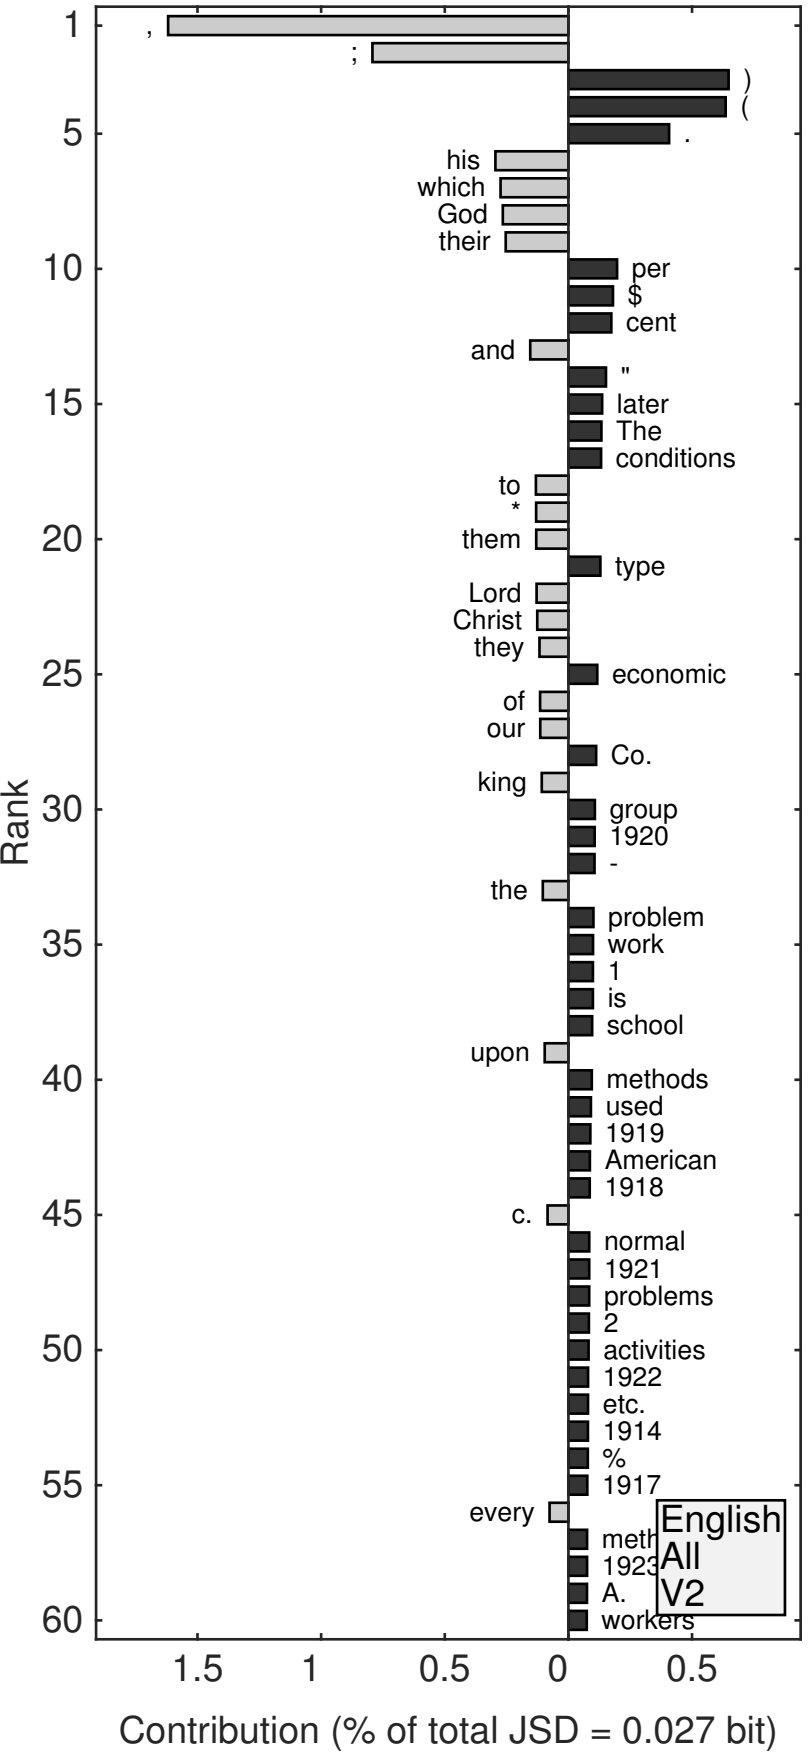

# Top JSD contributions: 1850s to 1930s

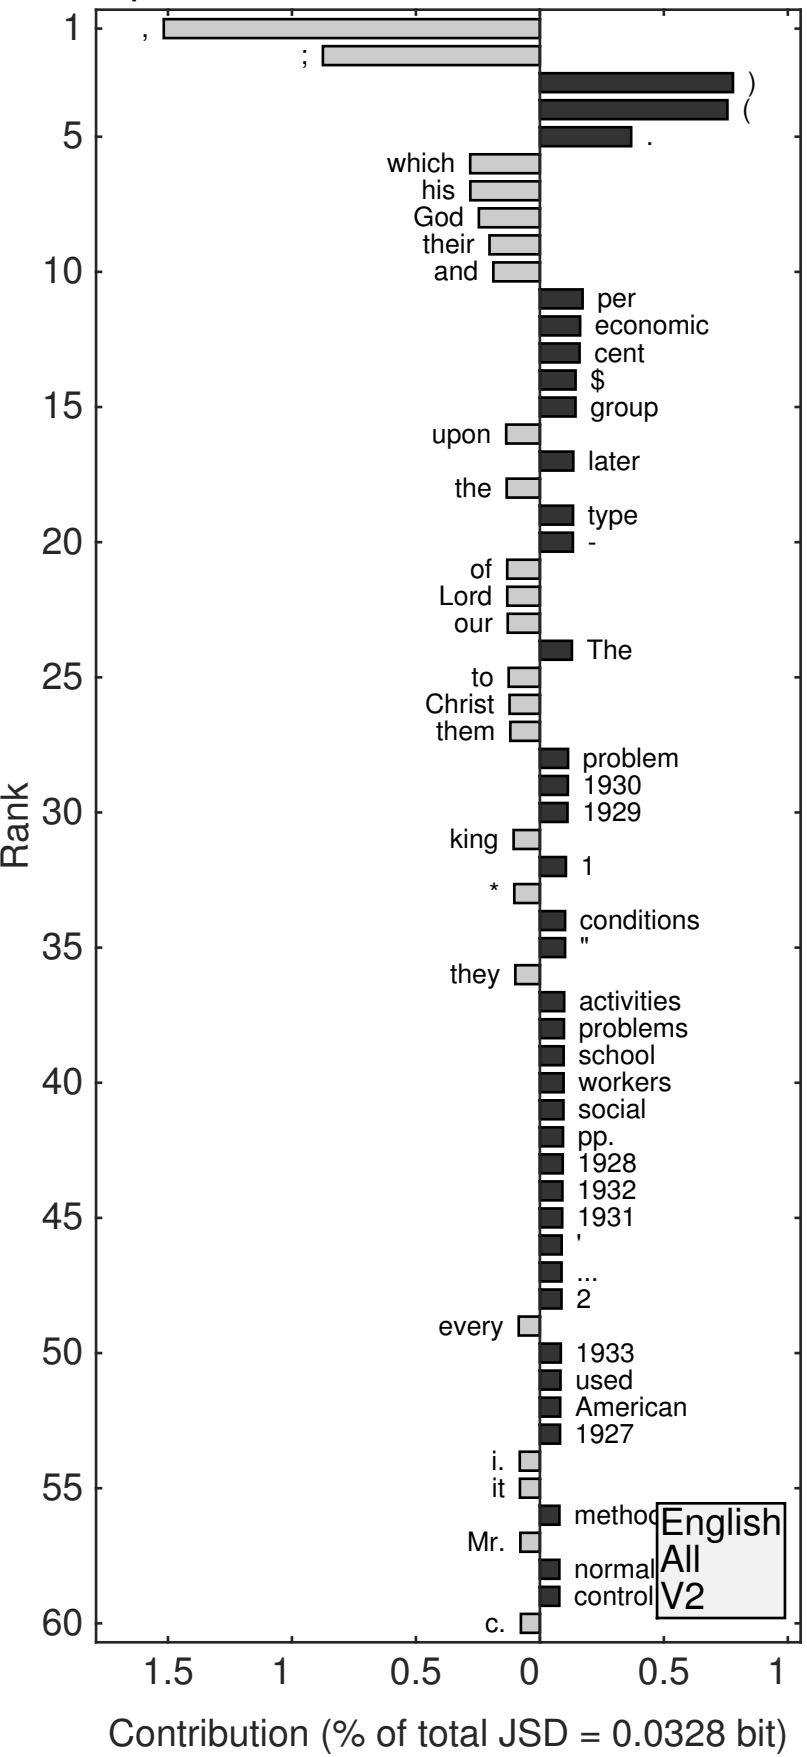

English  
All  
V2

Contribution (% of total JSD = 0.0328 bit)

# Top JSD contributions: 1850s to 1940s

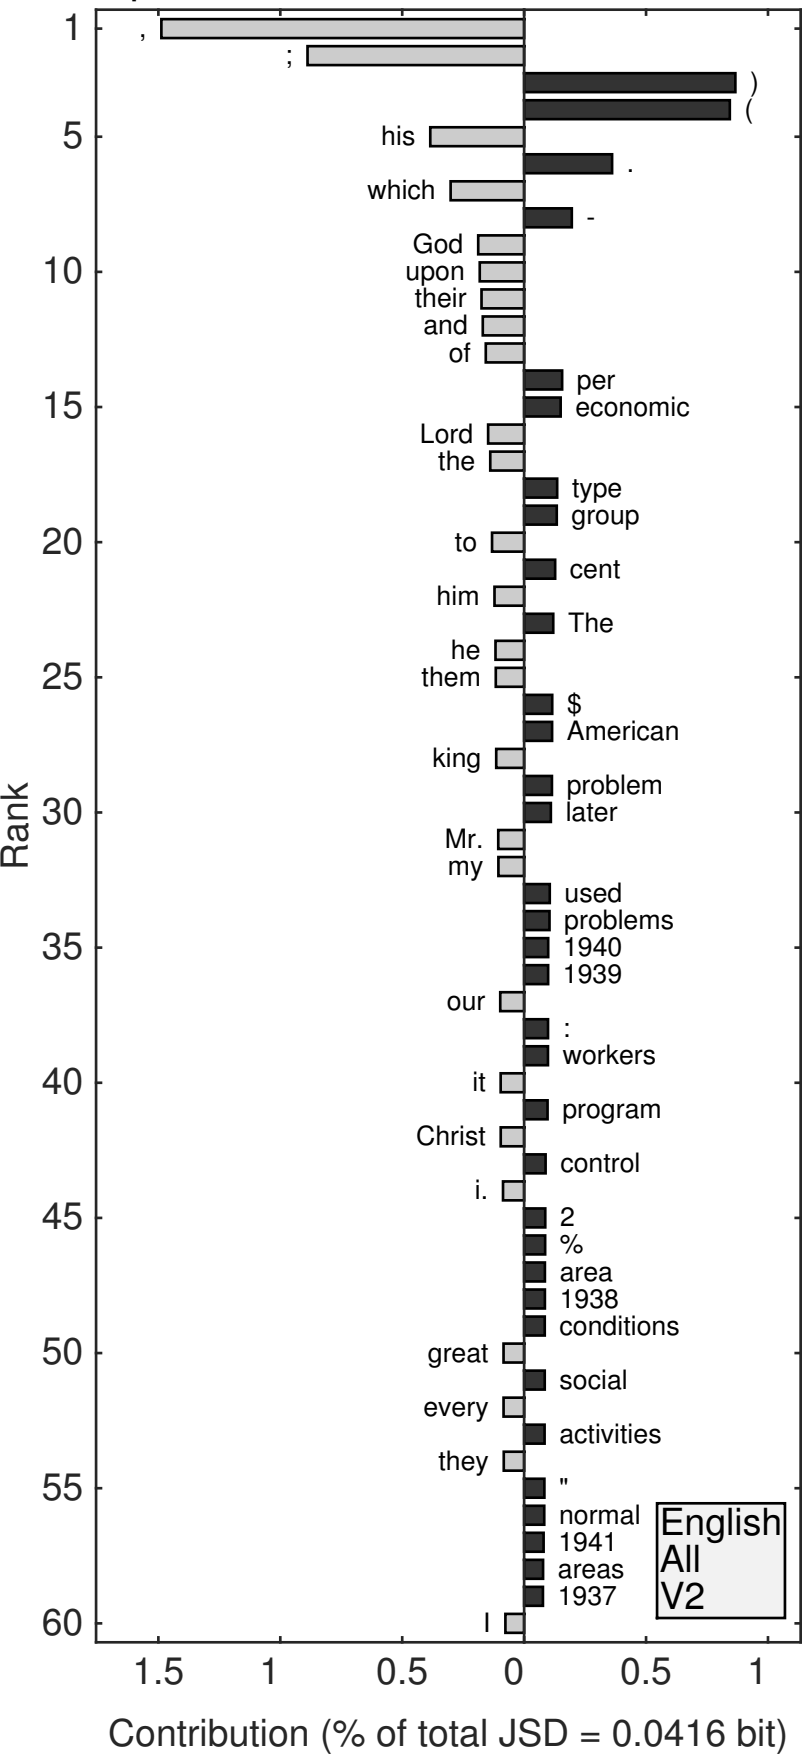

# Top JSD contributions: 1850s to 1950s

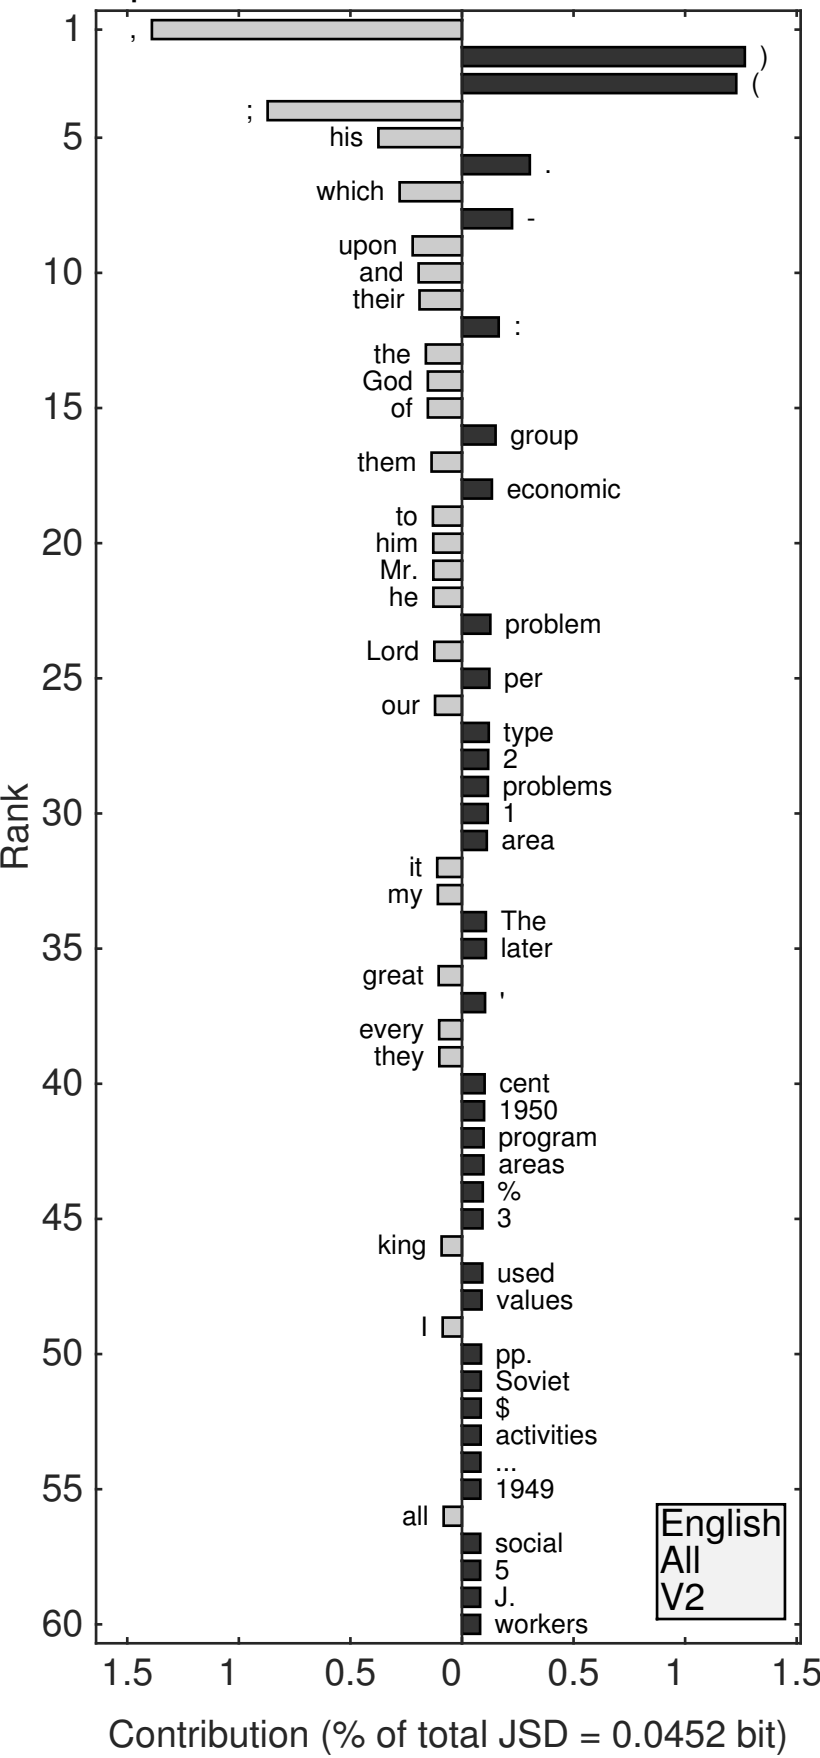

English  
All  
V2

Contribution (% of total JSD = 0.0452 bit)

# Top JSD contributions: 1850s to 1960s

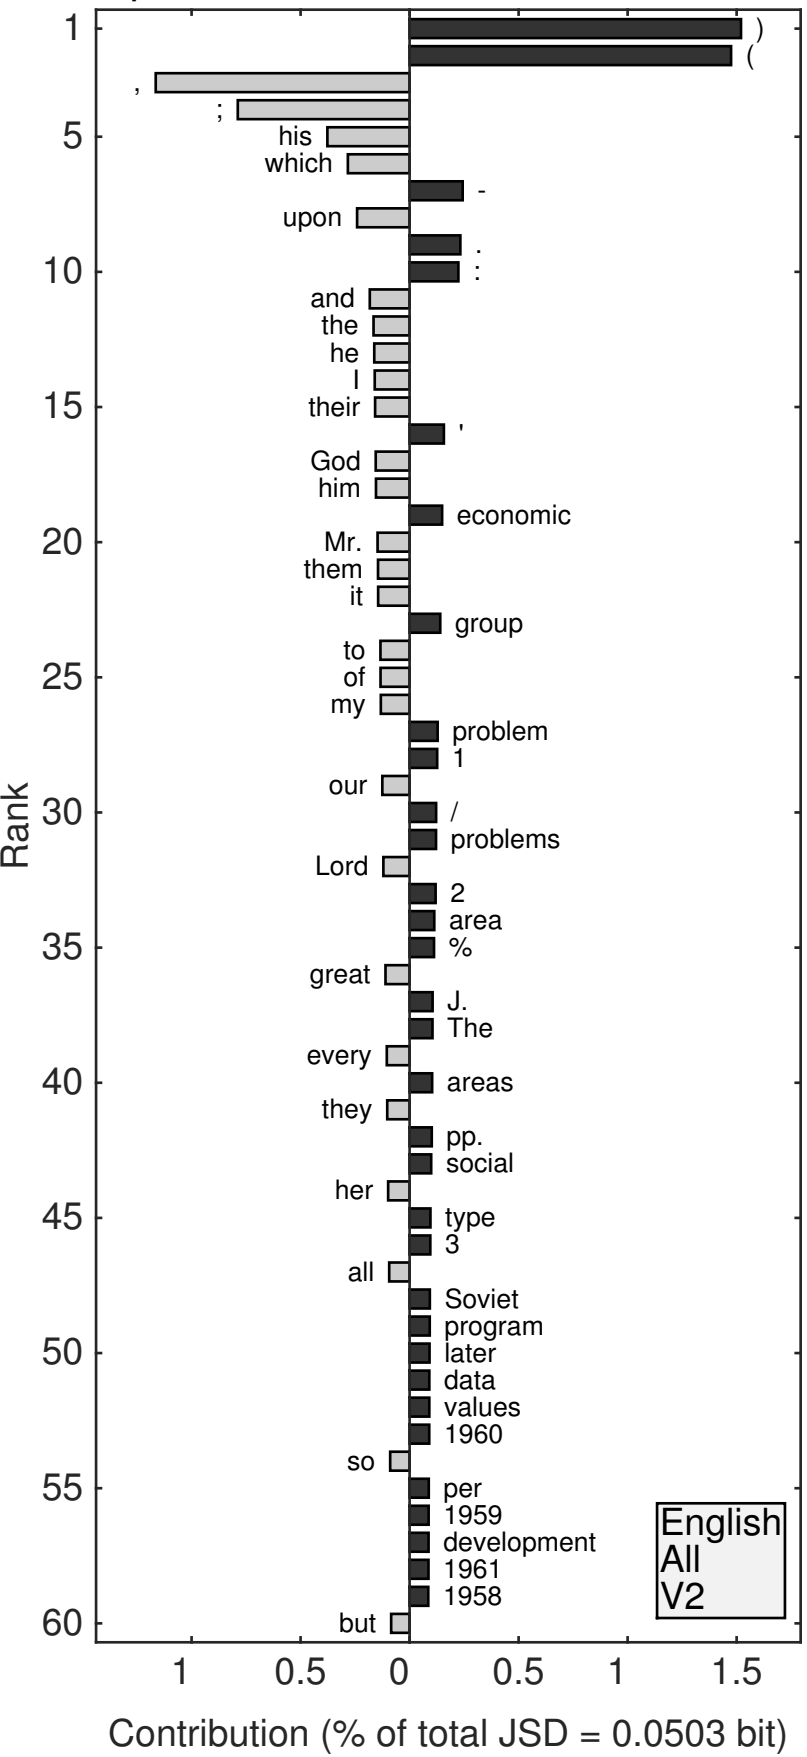



# Top JSD contributions: 1850s to 1970s

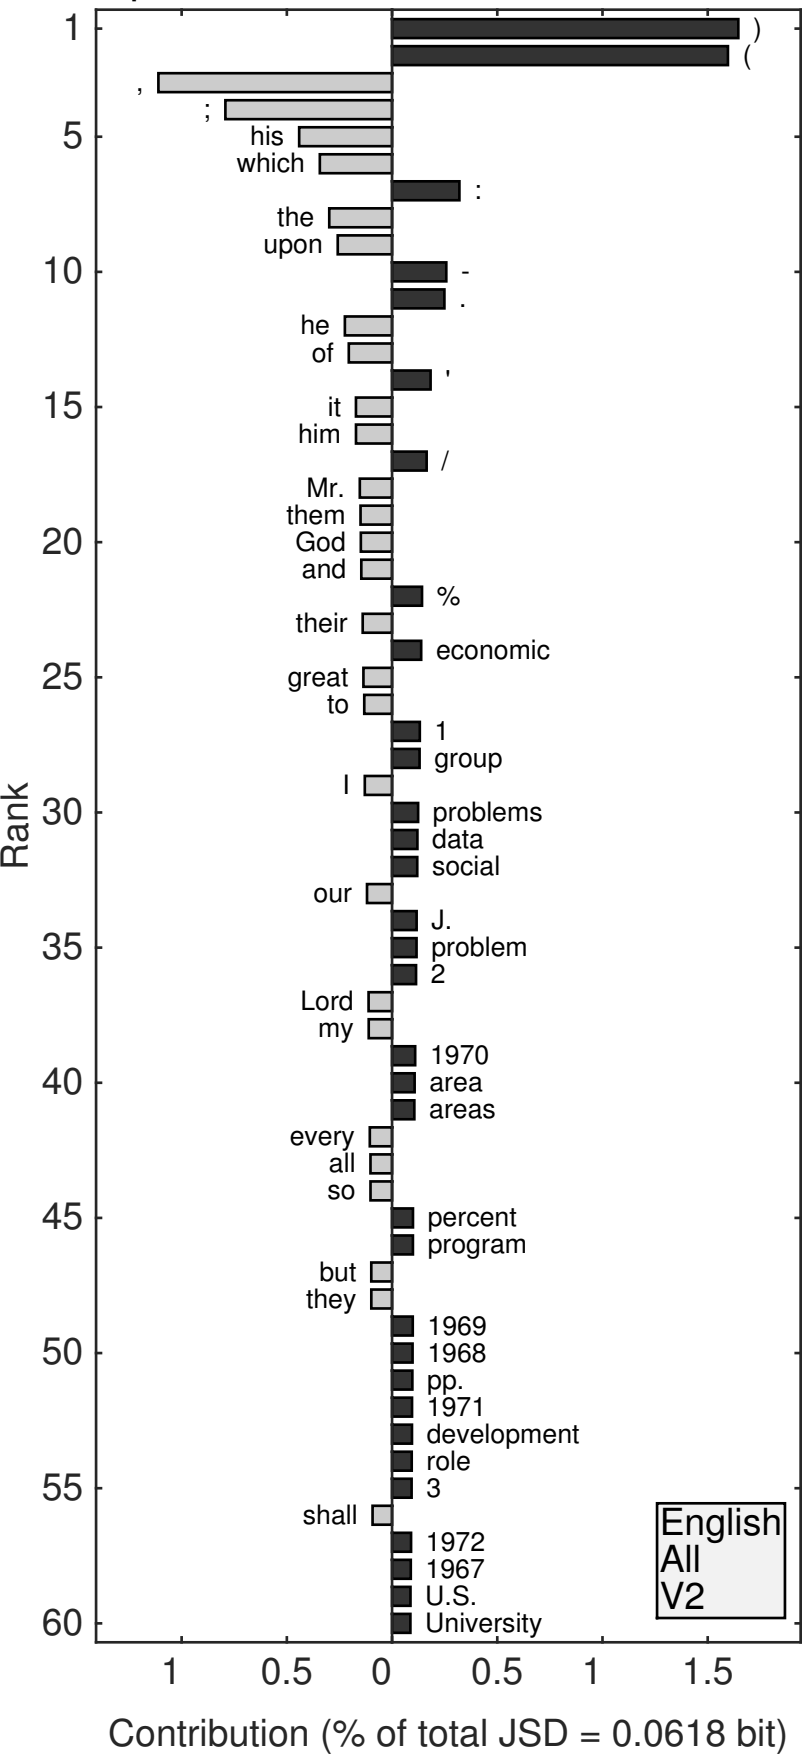

# Top JSD contributions: 1850s to 1980s

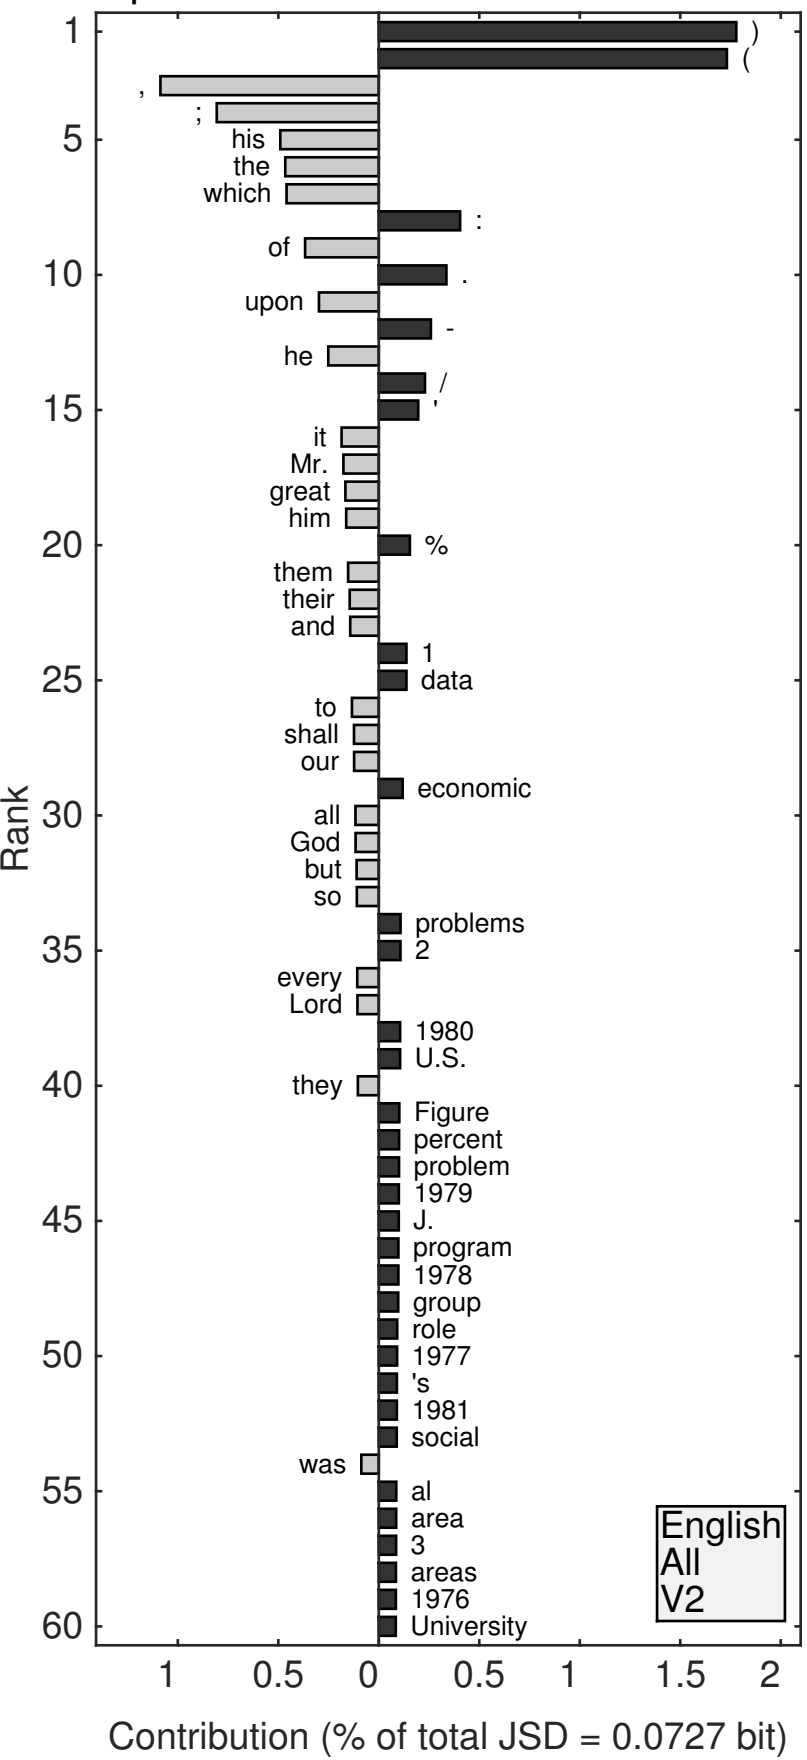

# Top JSD contributions: 1850s to 1990s

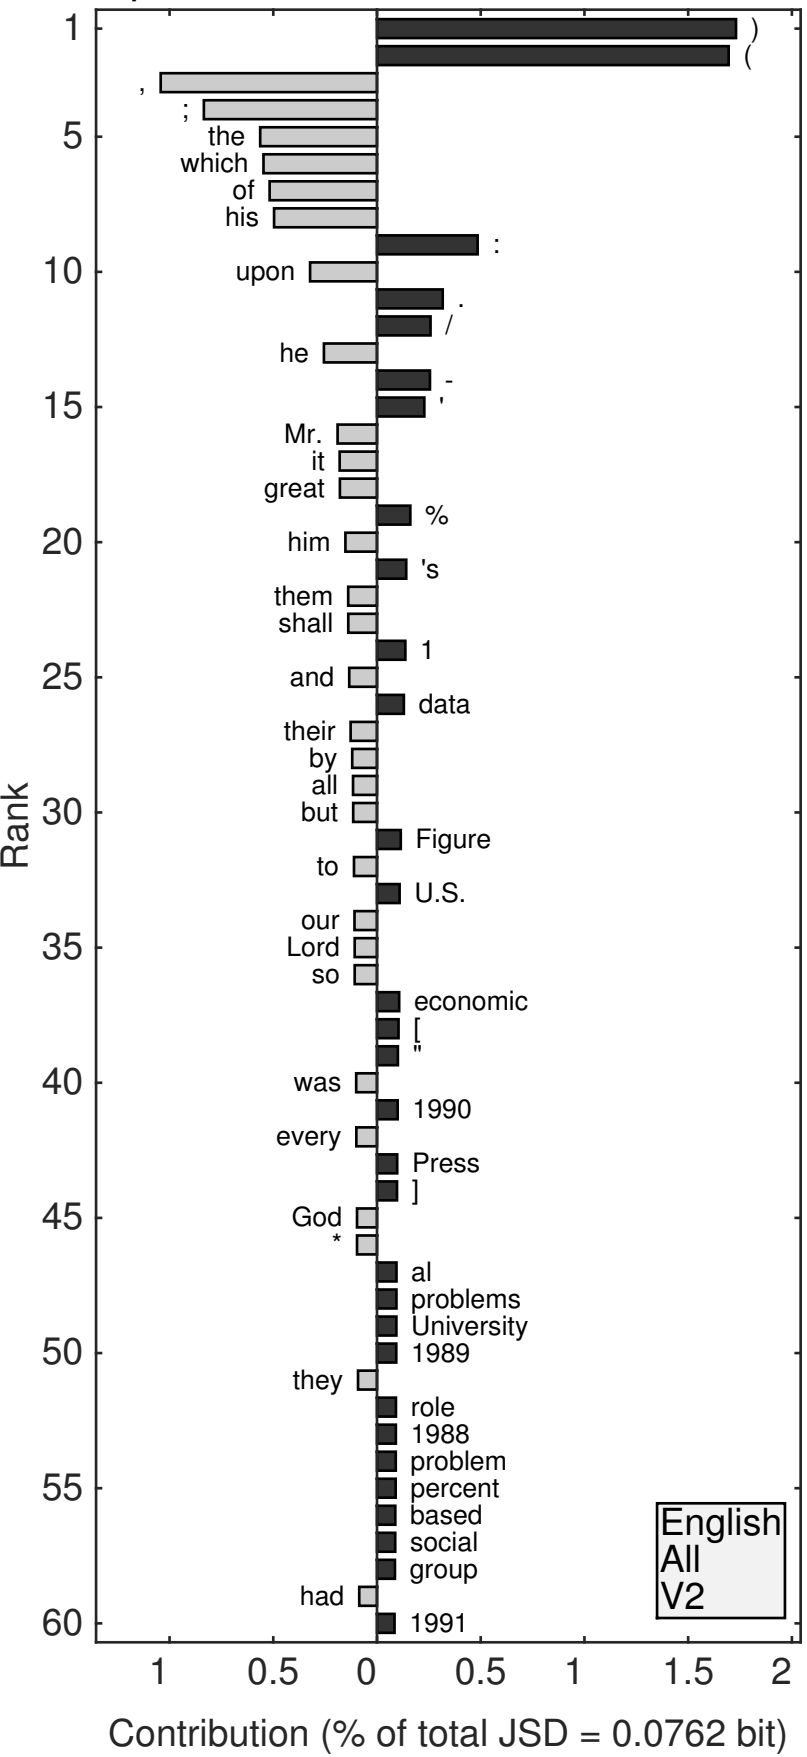

# Top JSD contributions: 1860s to 1870s

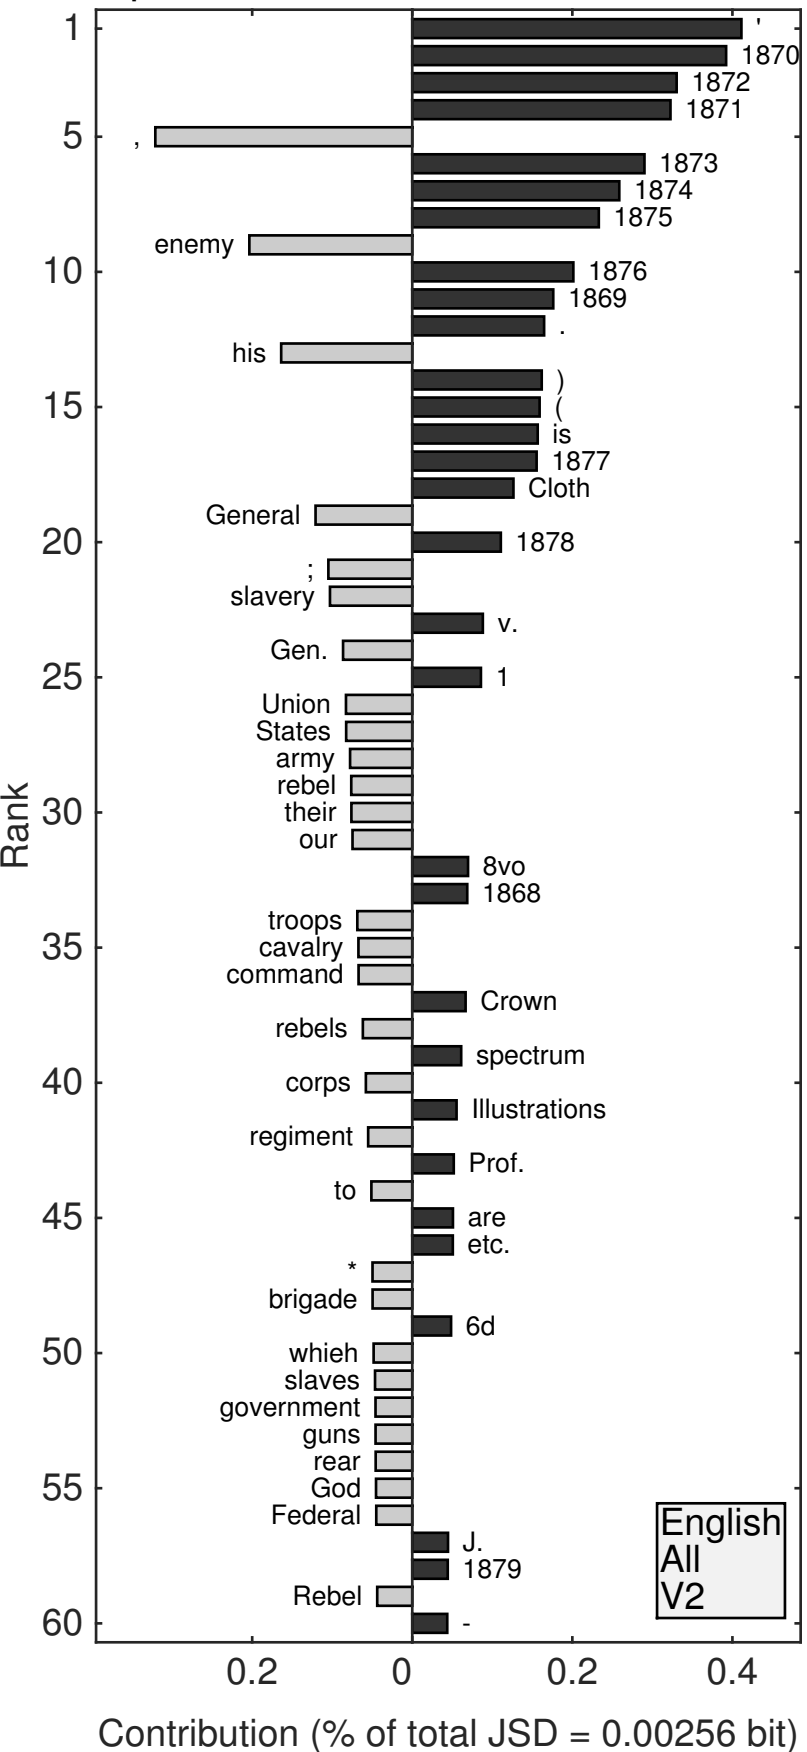

# Top JSD contributions: 1860s to 1880s

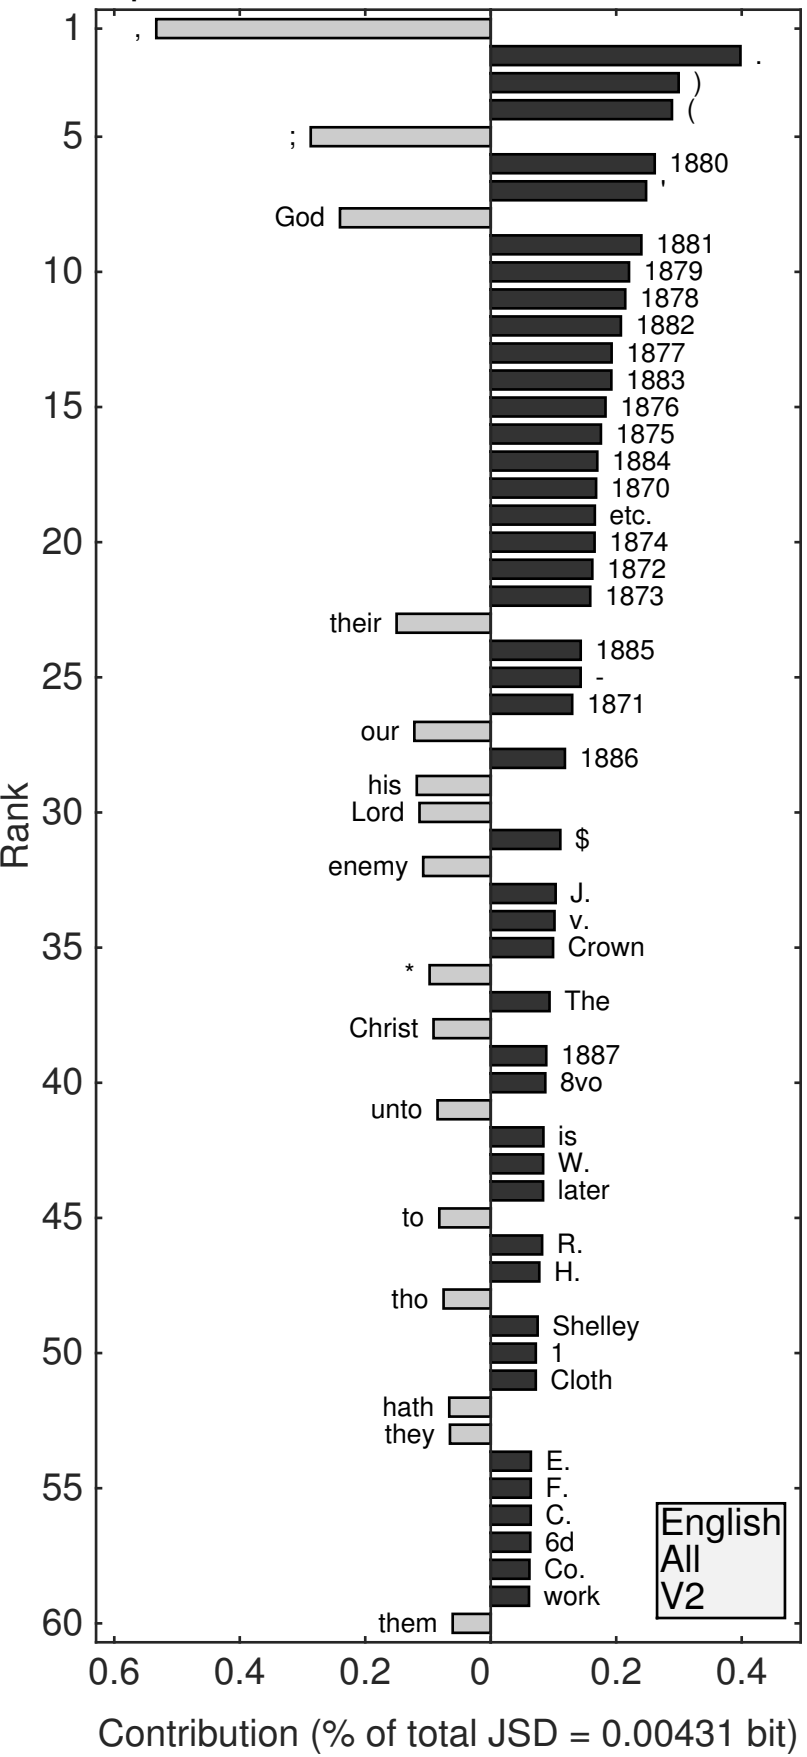

# Top JSD contributions: 1860s to 1890s

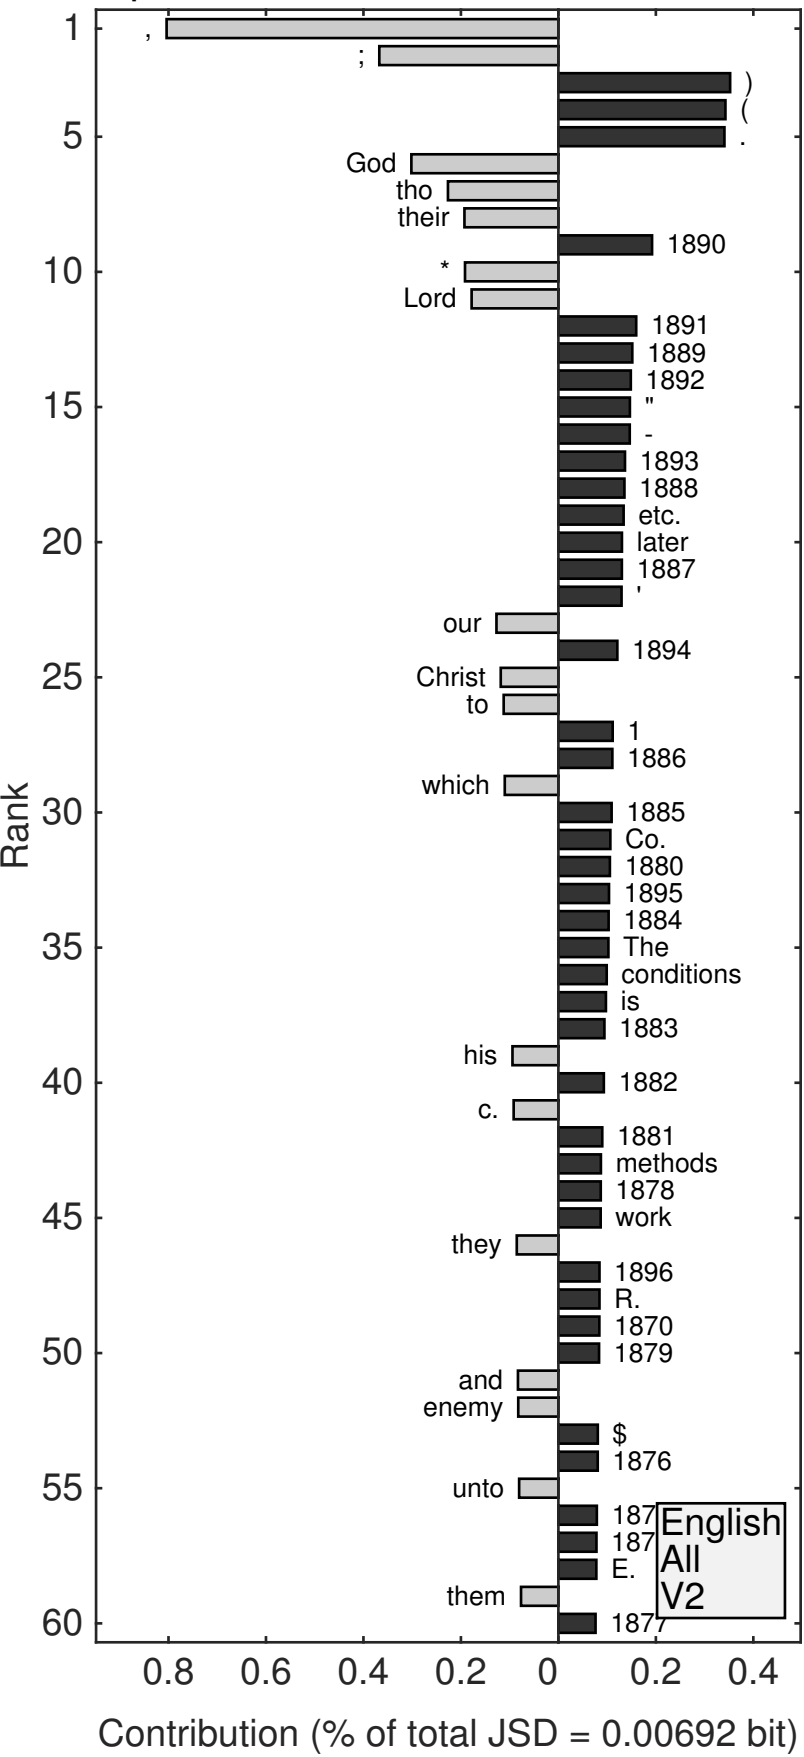

# Top JSD contributions: 1860s to 1900s

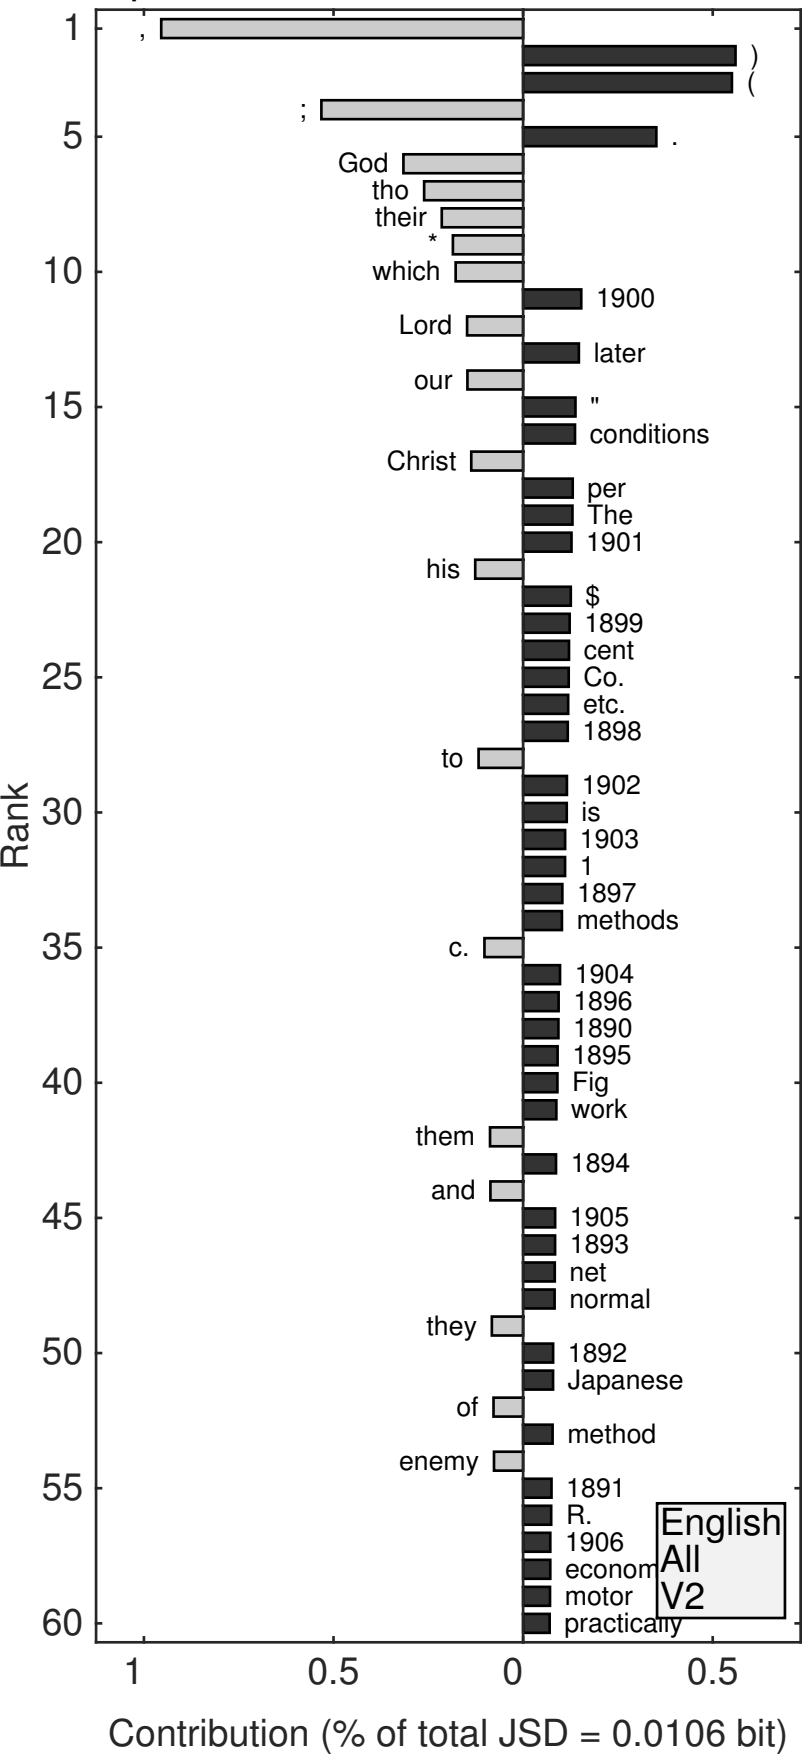

English  
All  
V2

Contribution (% of total JSD = 0.0106 bit)

# Top JSD contributions: 1860s to 1910s

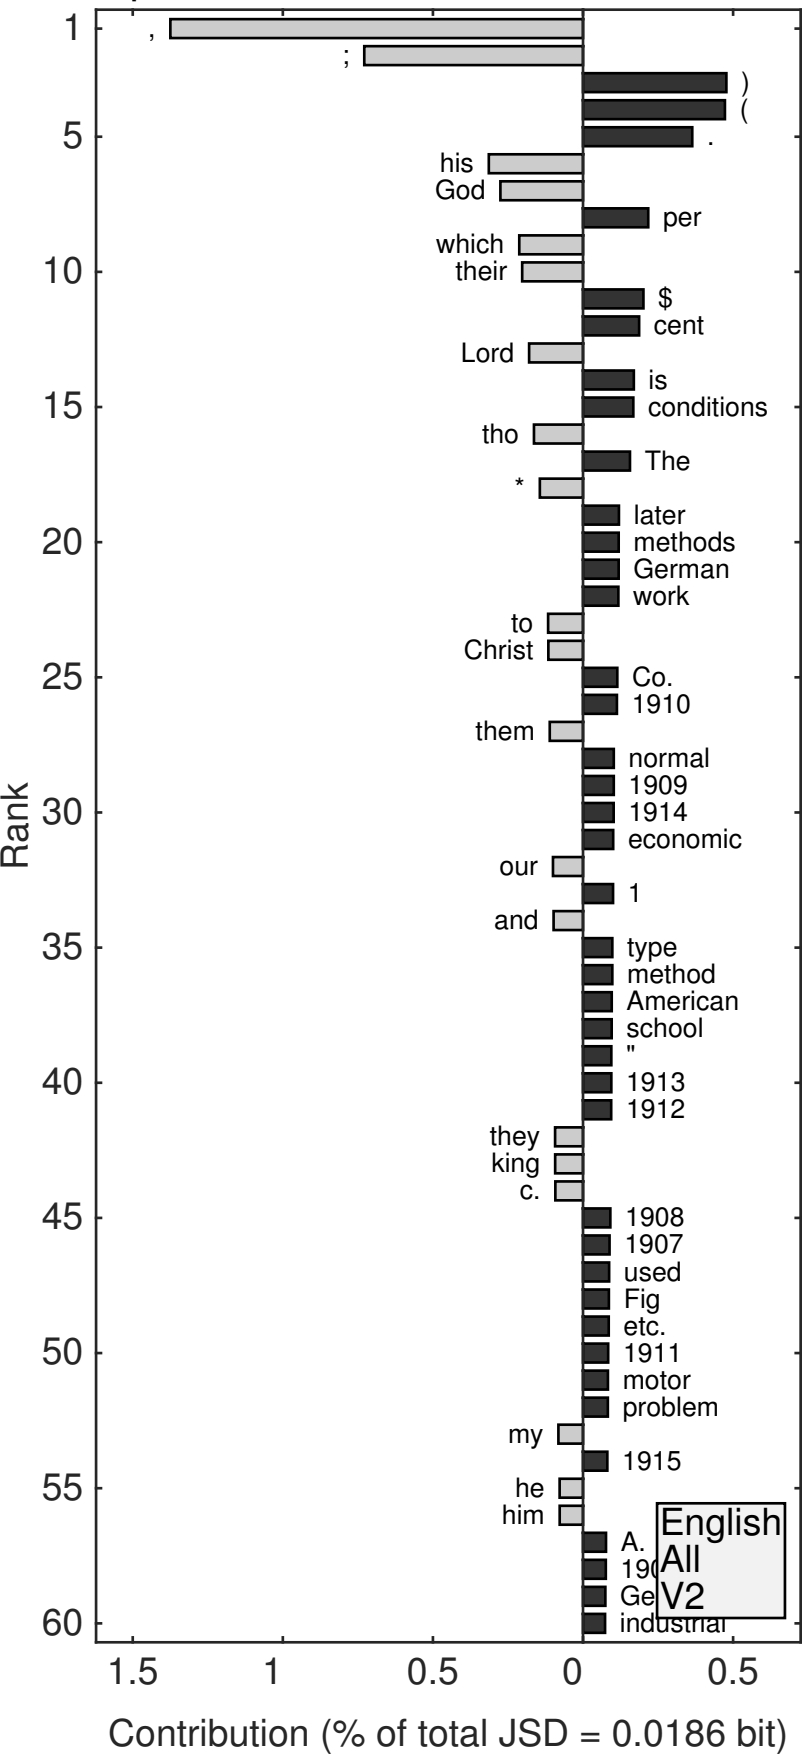

Contribution (% of total JSD = 0.0186 bit)

English  
All  
V2



# Top JSD contributions: 1860s to 1920s

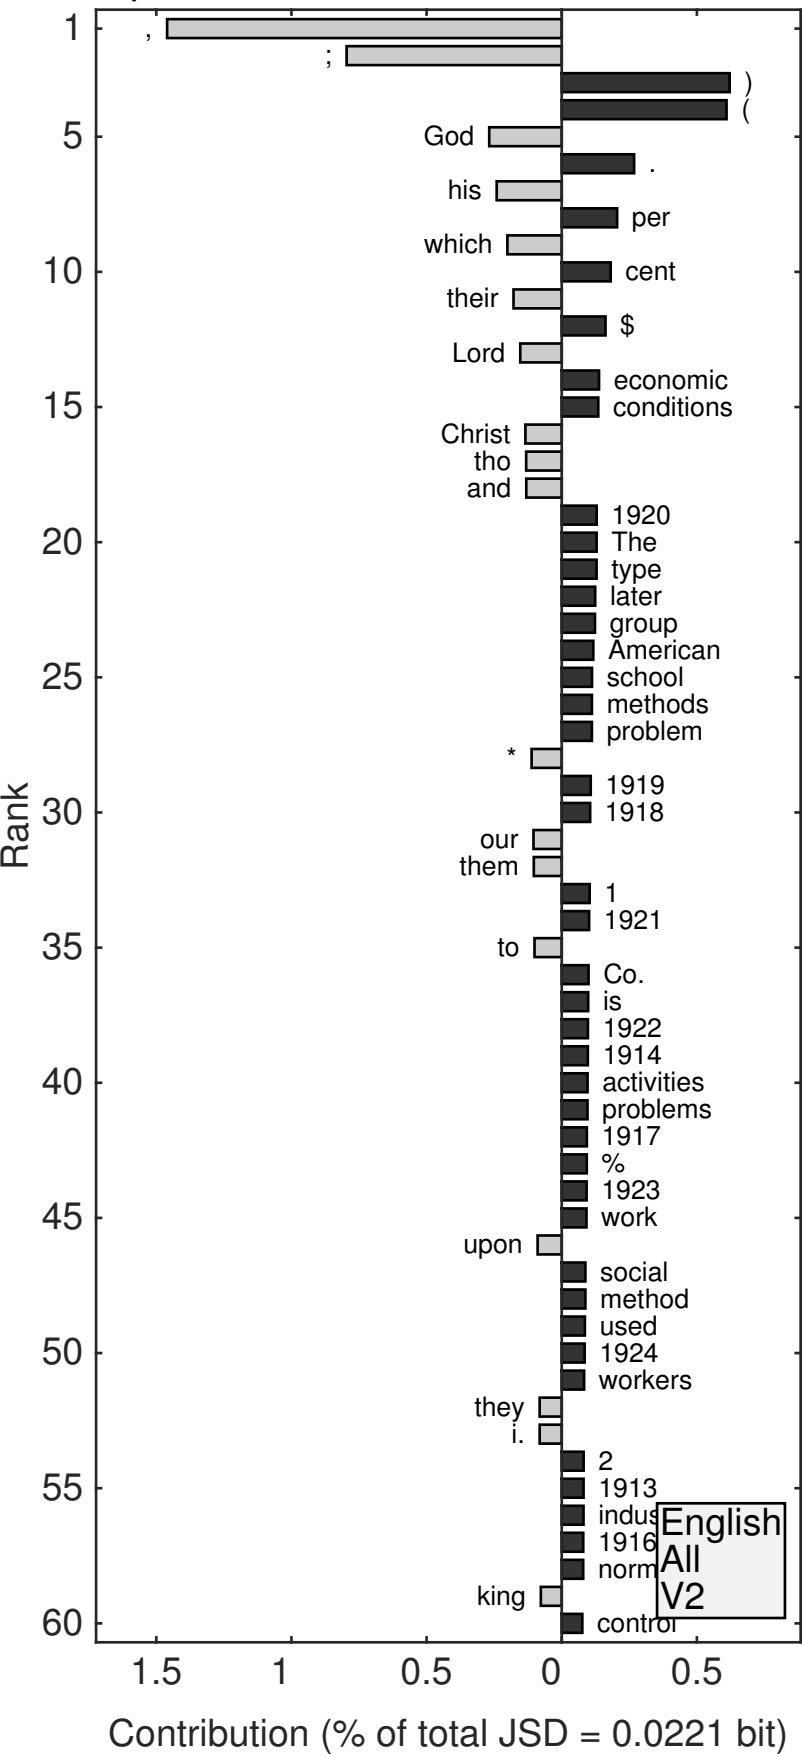

English  
All  
V2

# Top JSD contributions: 1860s to 1930s

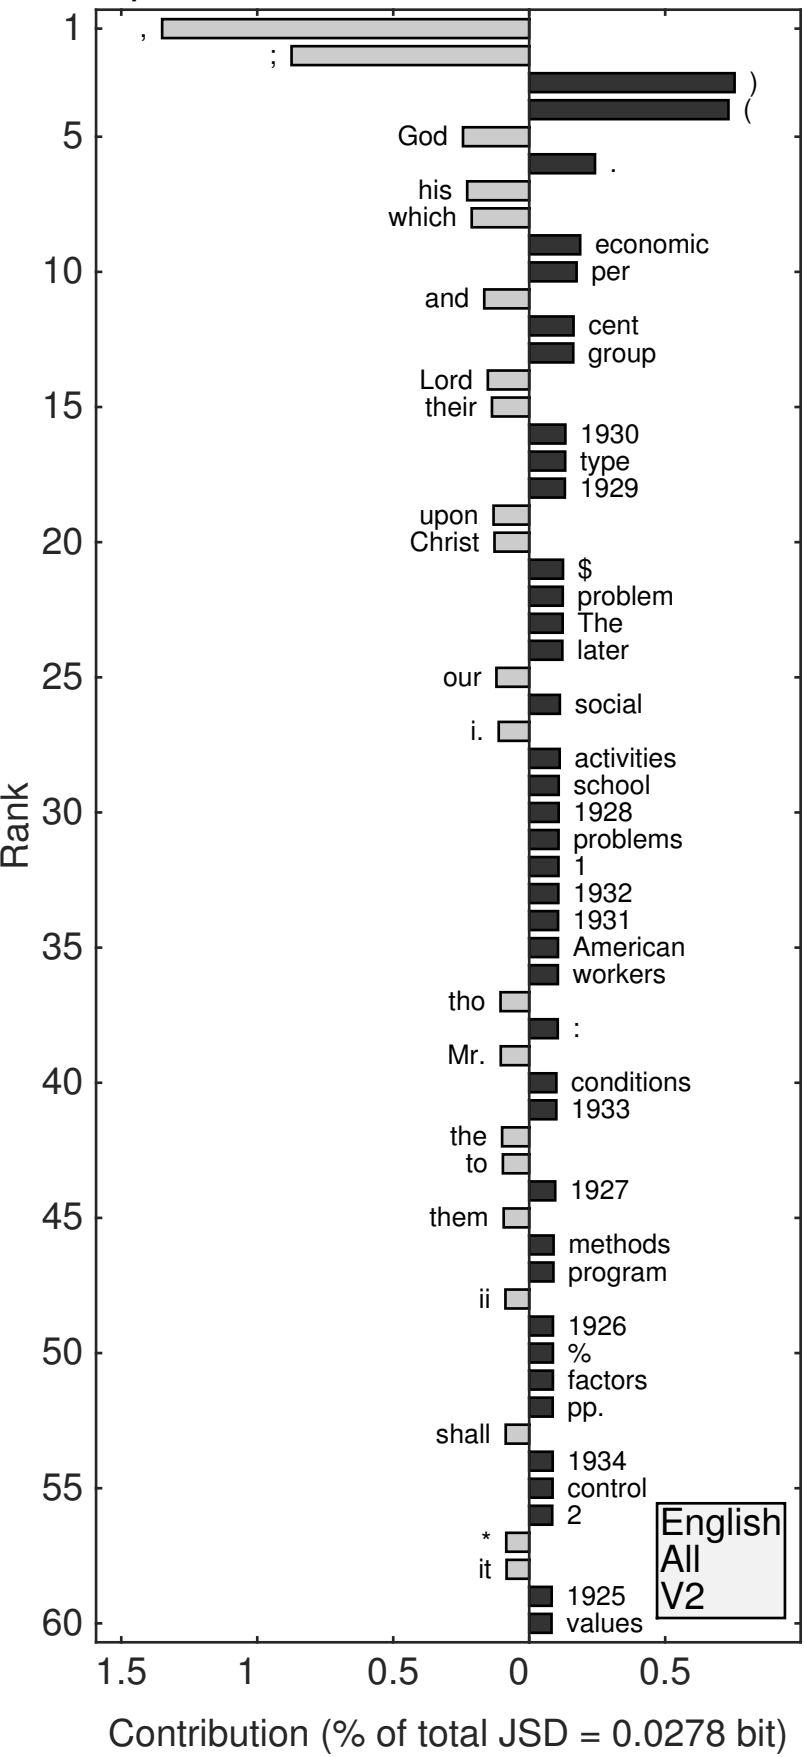

# Top JSD contributions: 1860s to 1940s

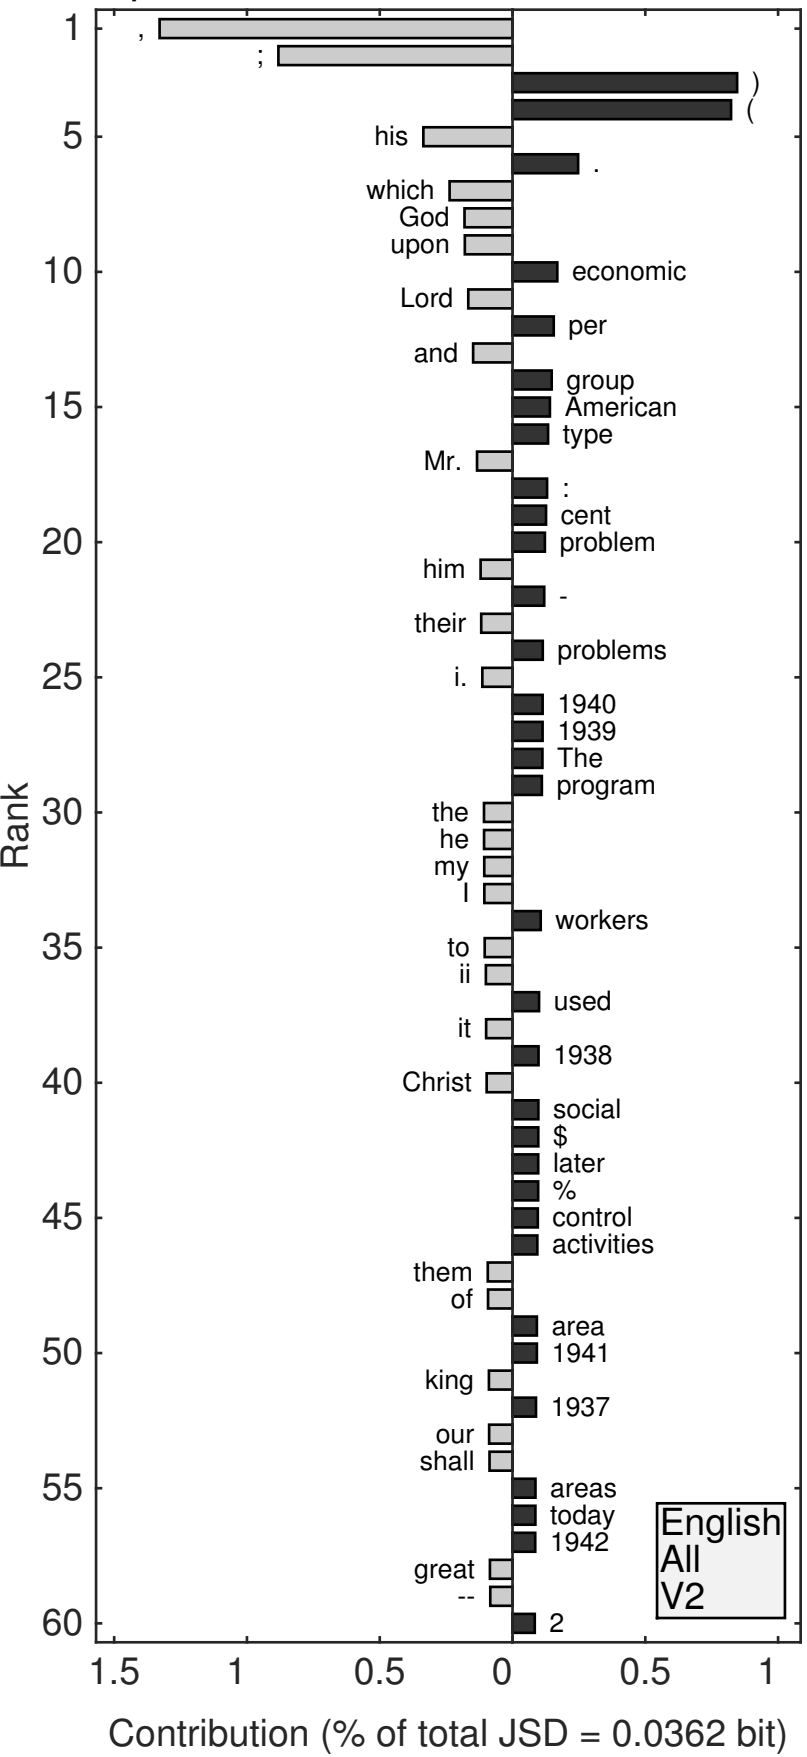

# Top JSD contributions: 1860s to 1950s

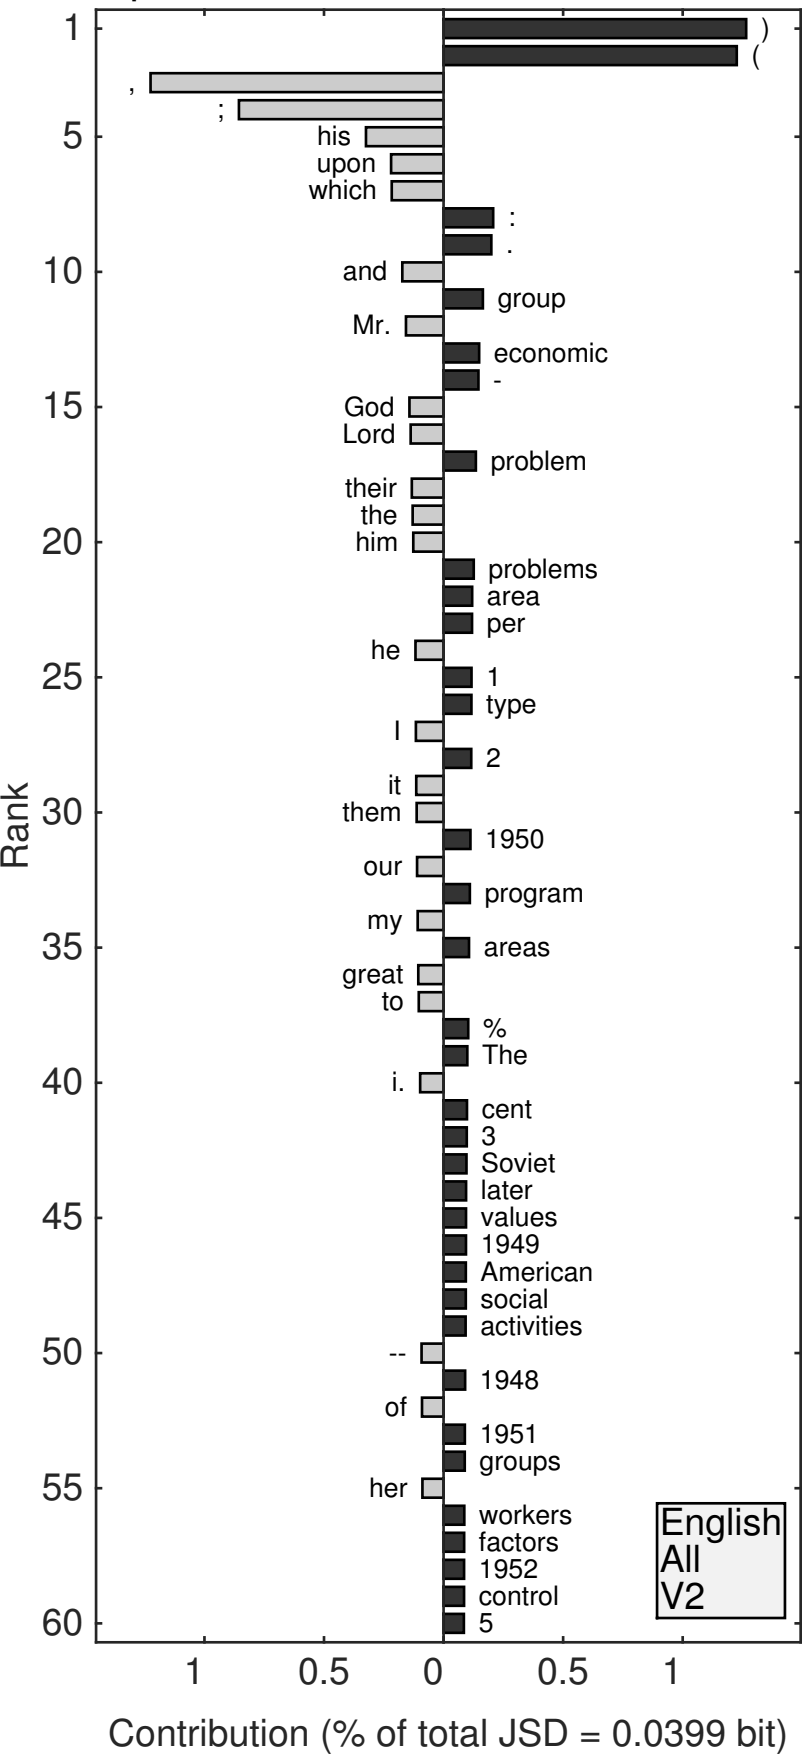

English  
All  
V2

# Top JSD contributions: 1860s to 1960s

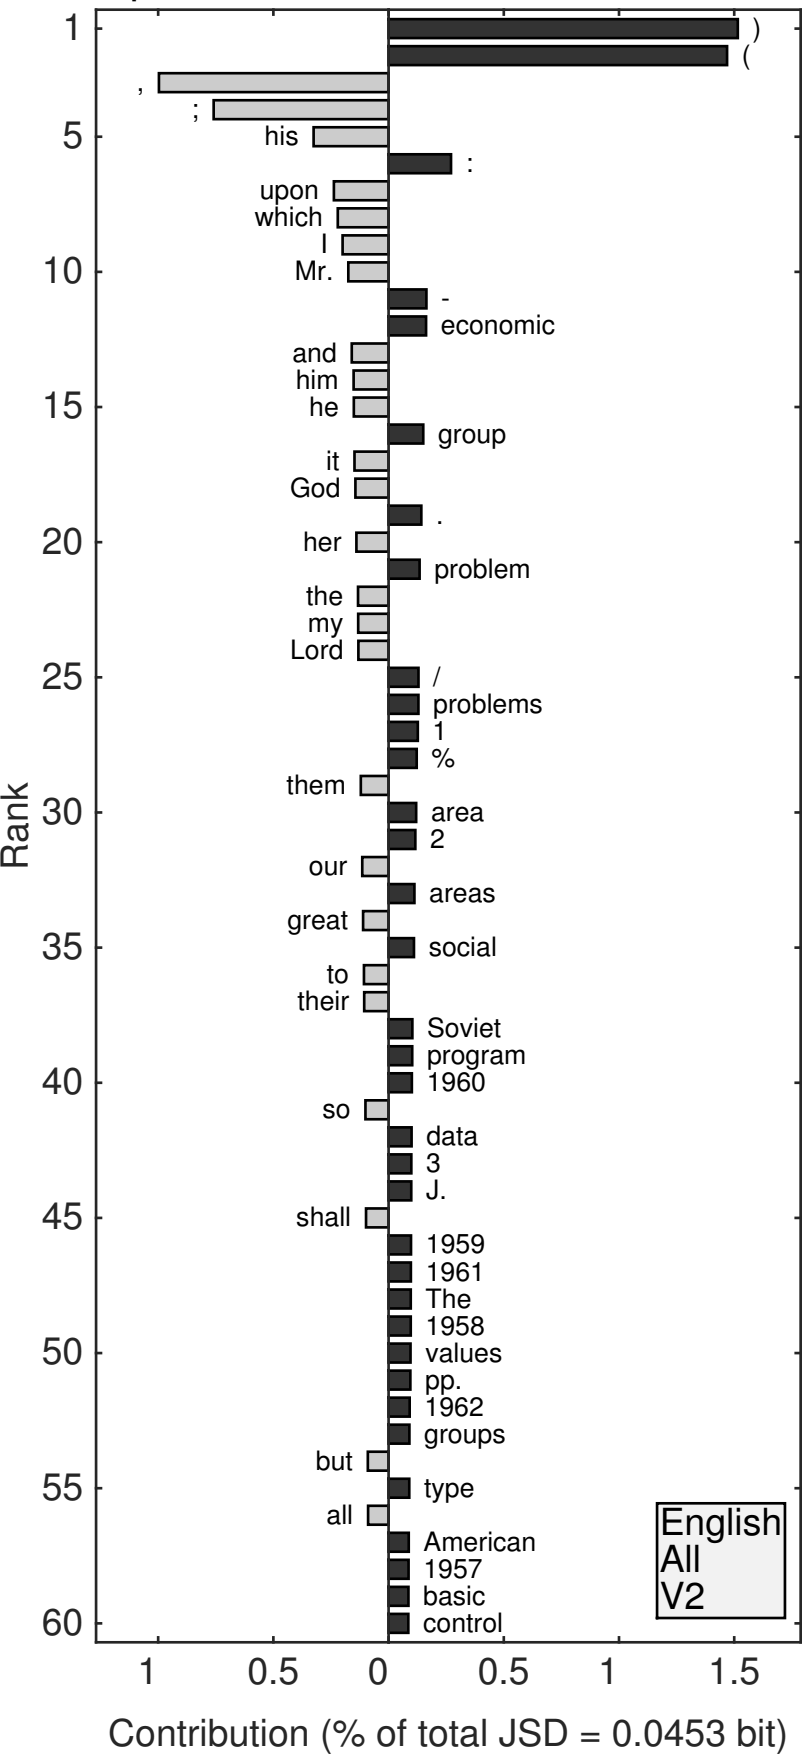

# Top JSD contributions: 1860s to 1970s

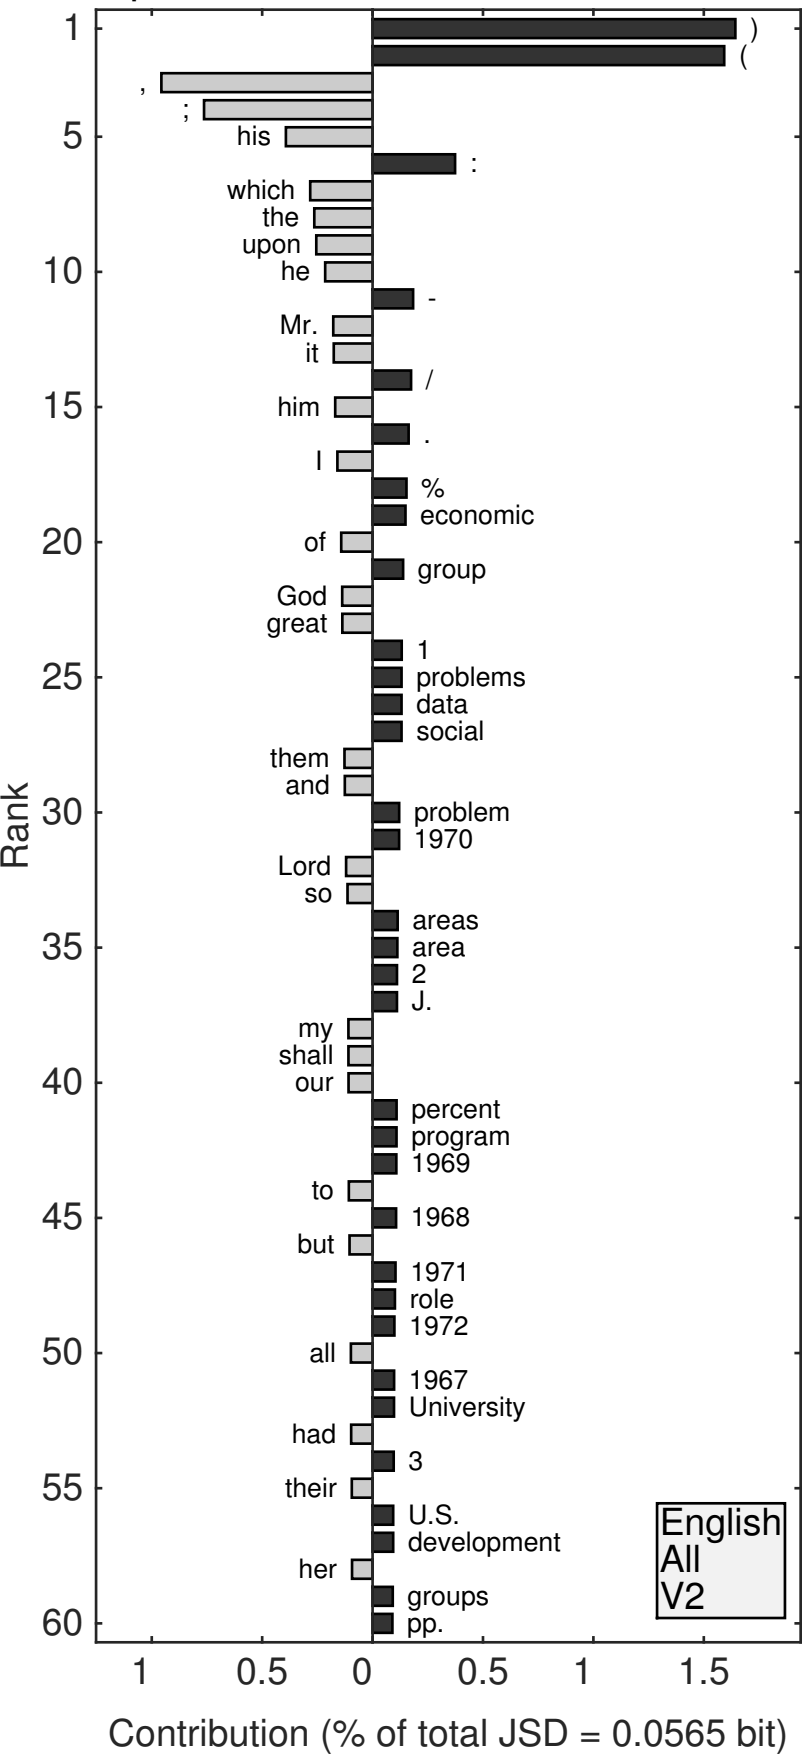

# Top JSD contributions: 1860s to 1980s

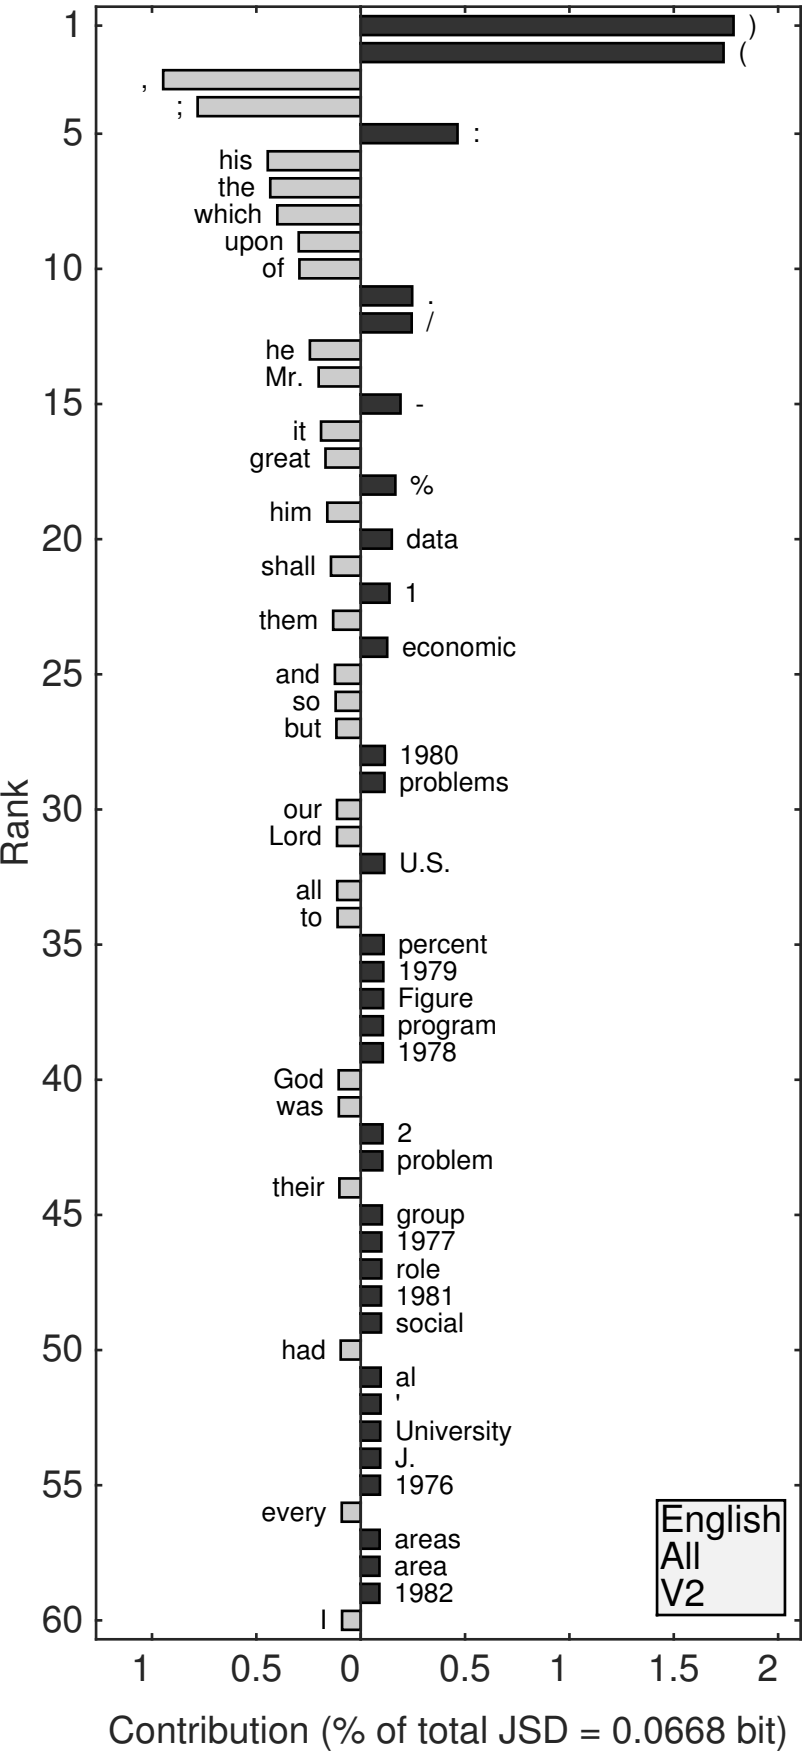

# Top JSD contributions: 1860s to 1990s

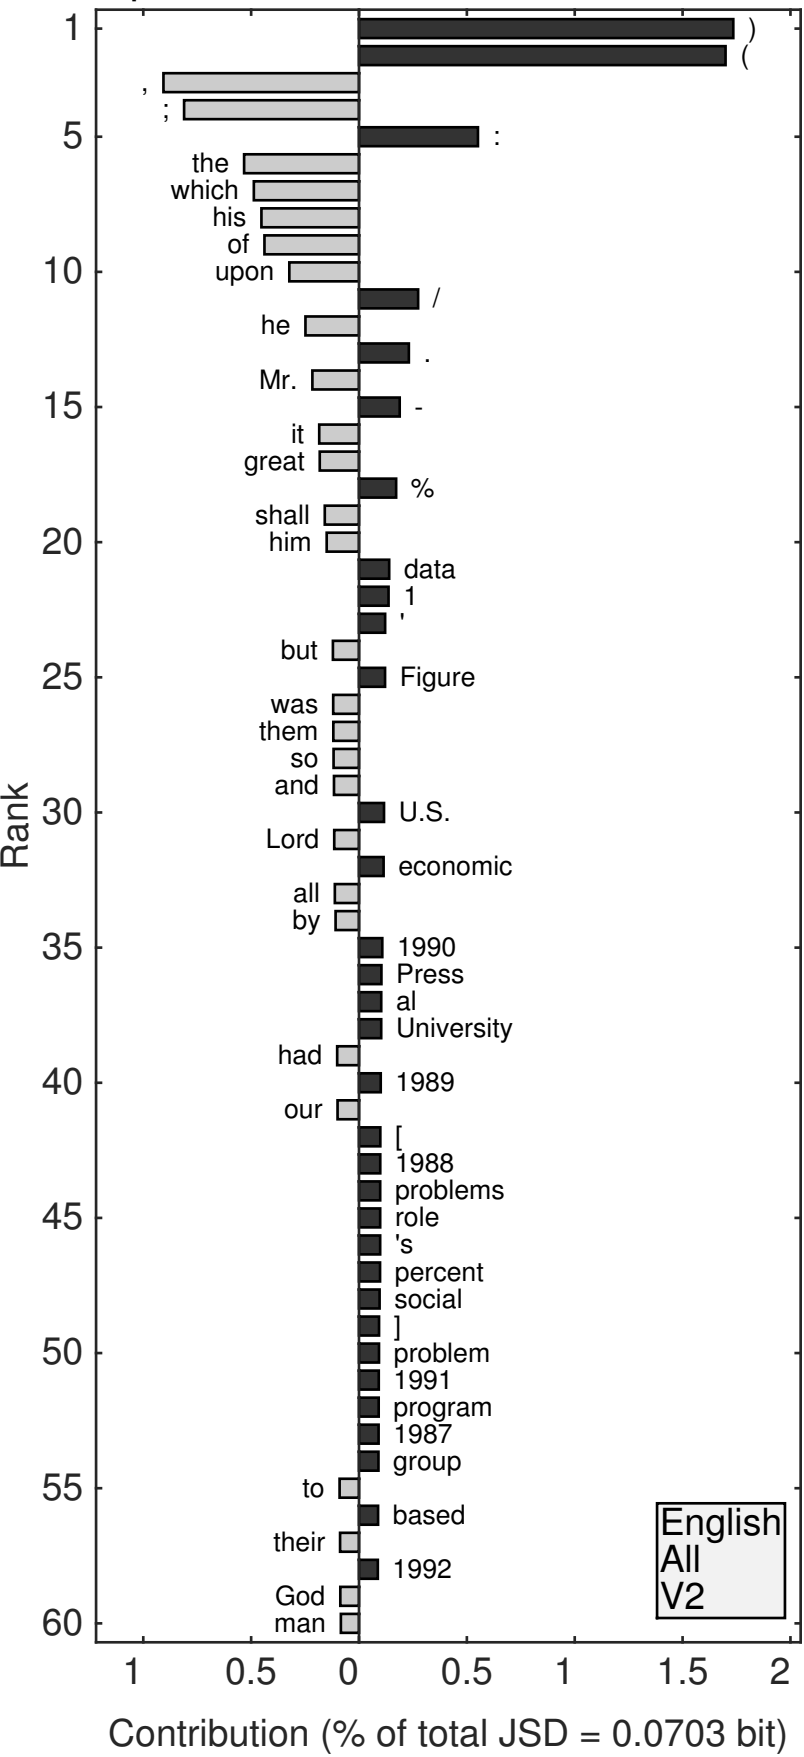



# Top JSD contributions: 1870s to 1880s

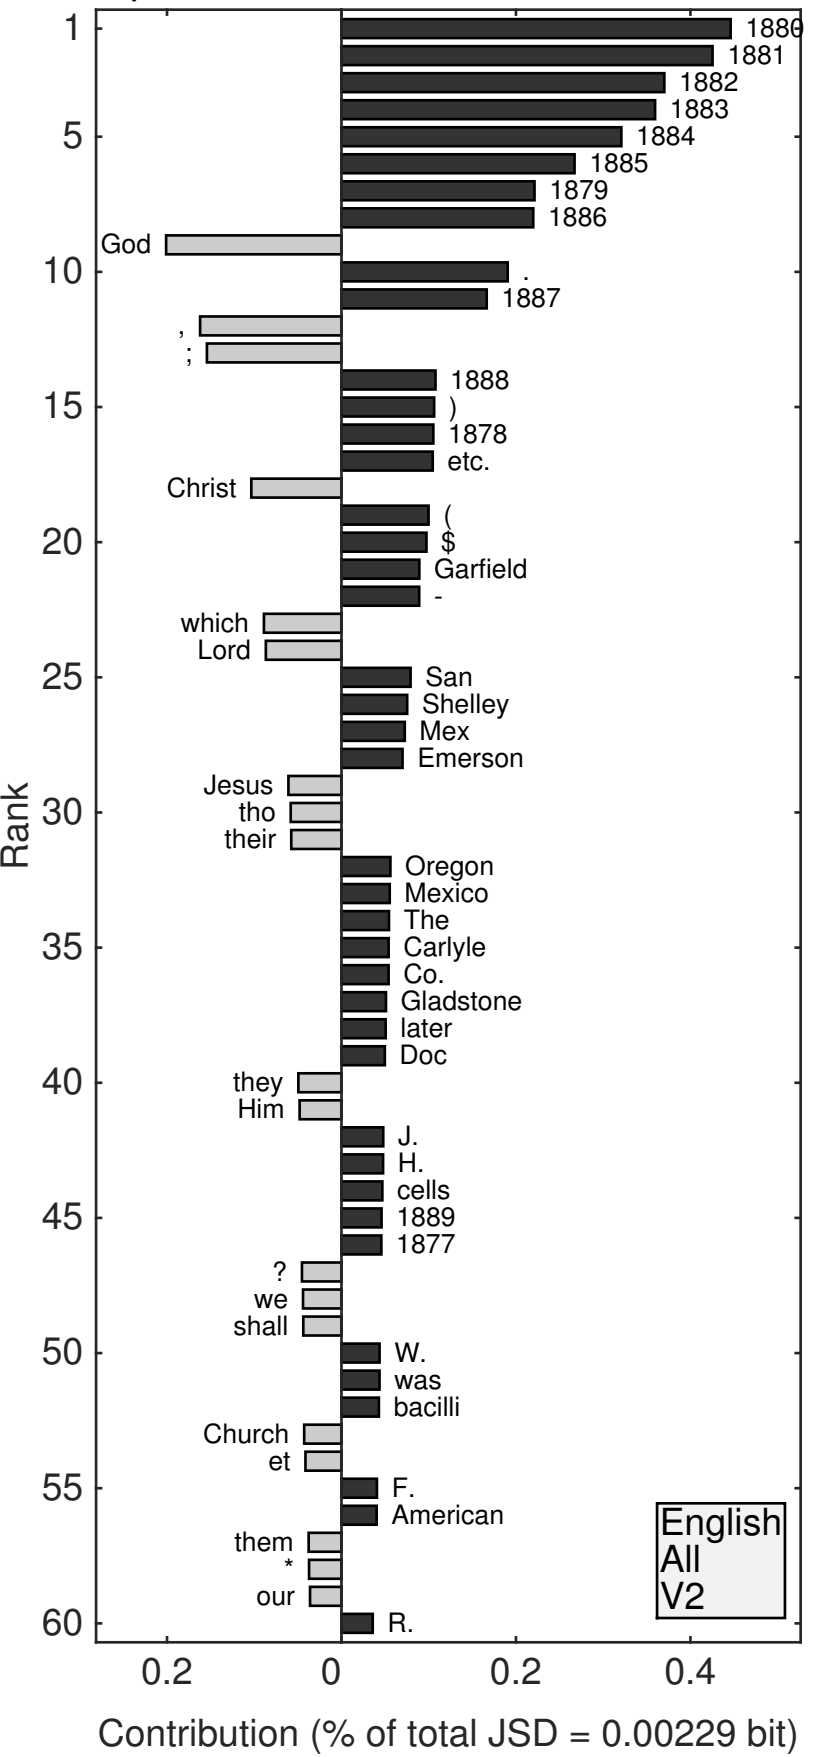

# Top JSD contributions: 1870s to 1890s

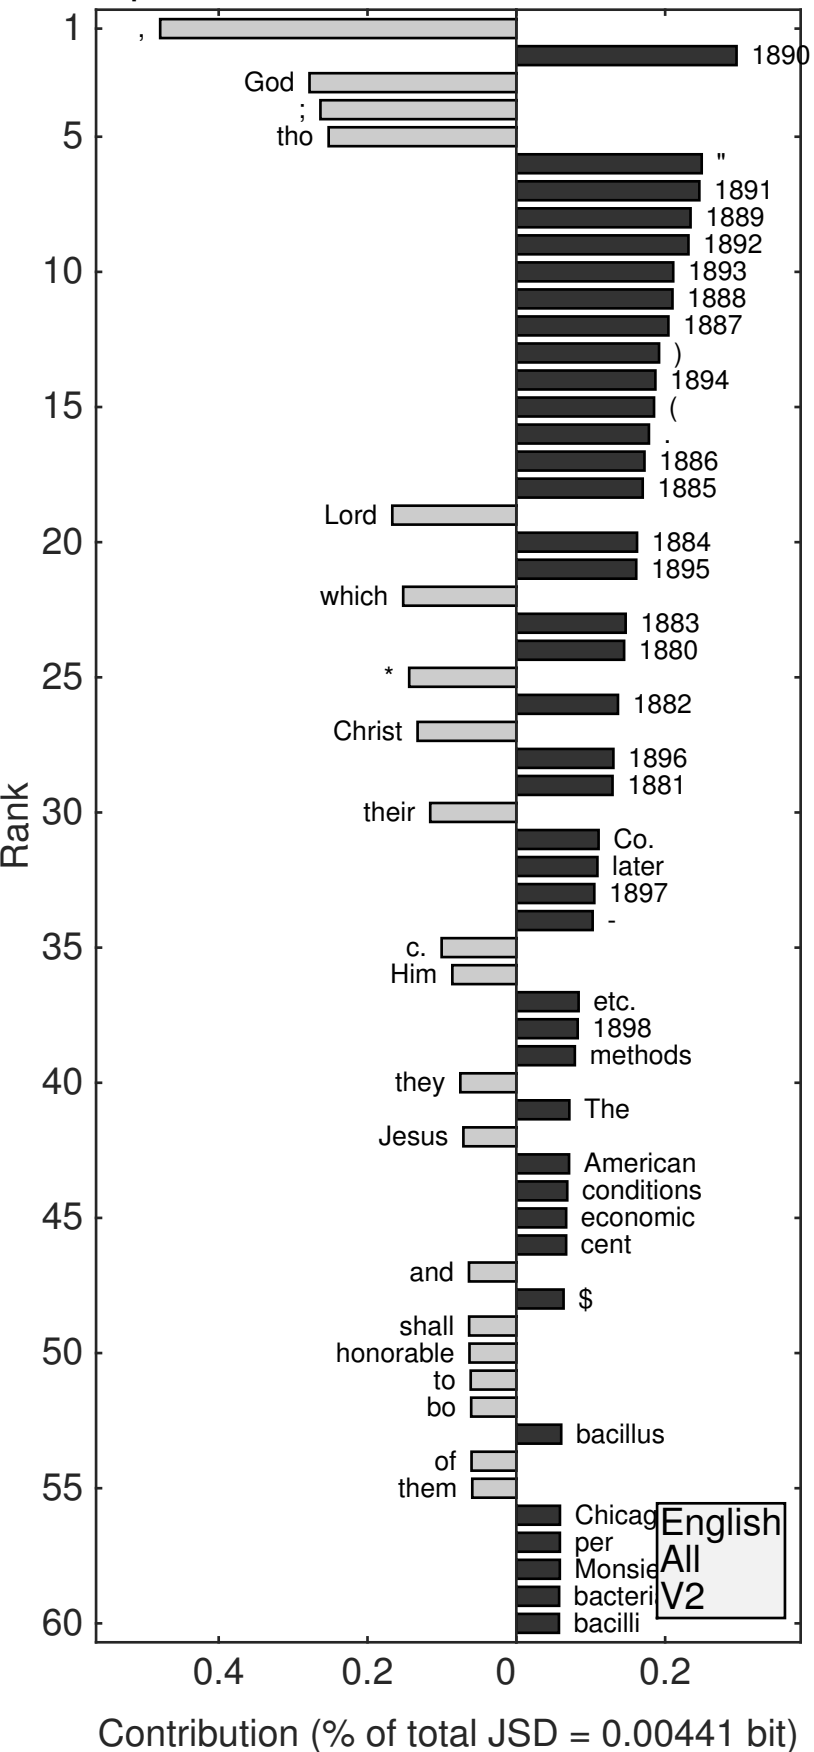

# Top JSD contributions: 1870s to 1900s

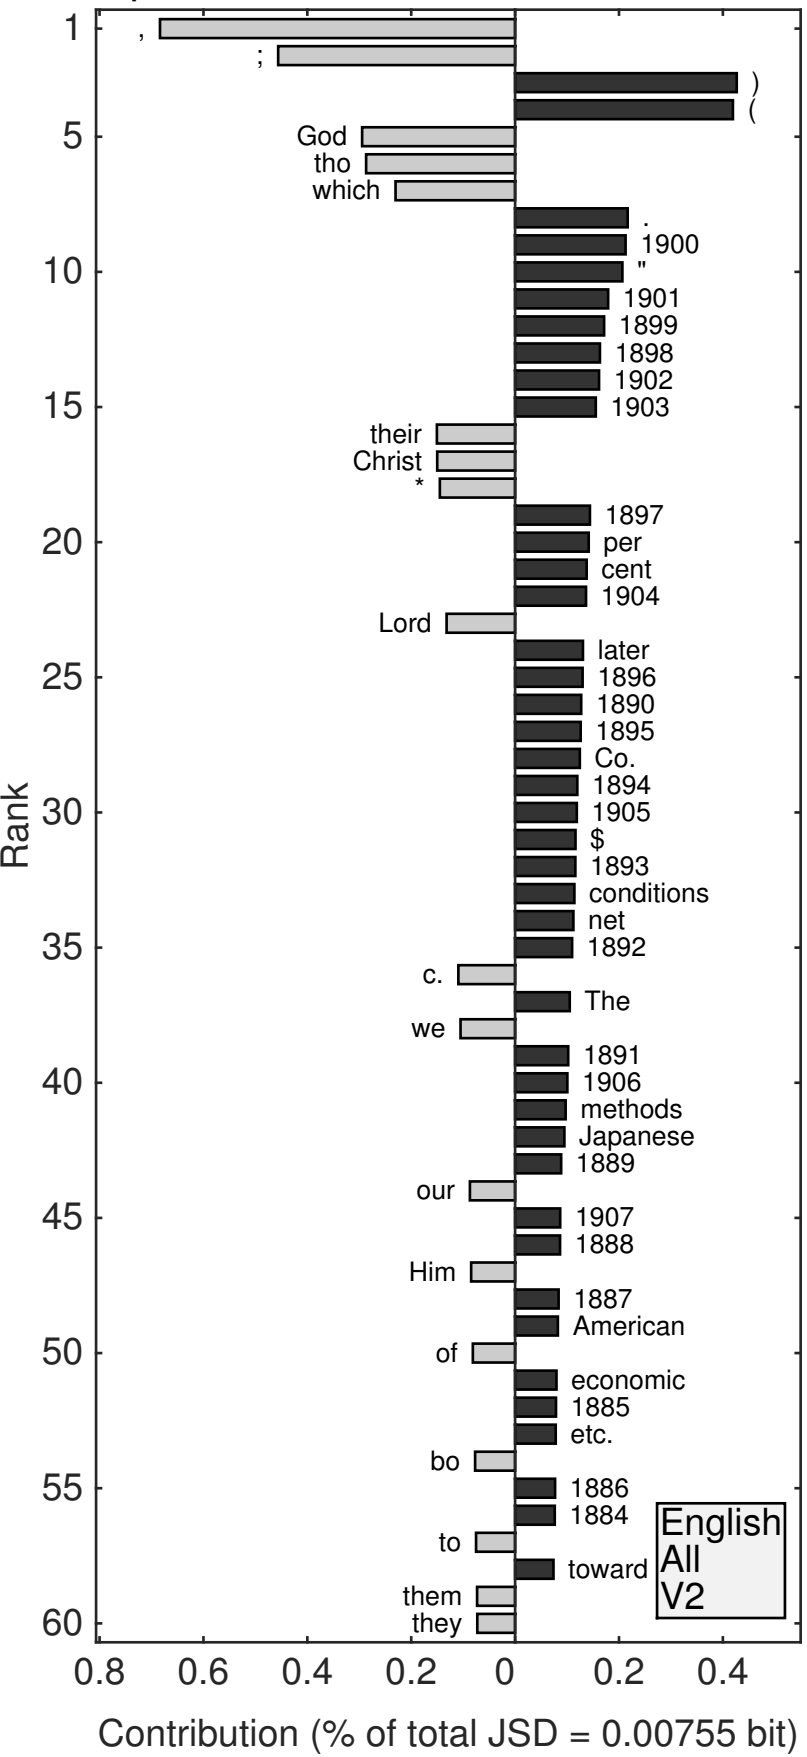

# Top JSD contributions: 1870s to 1910s

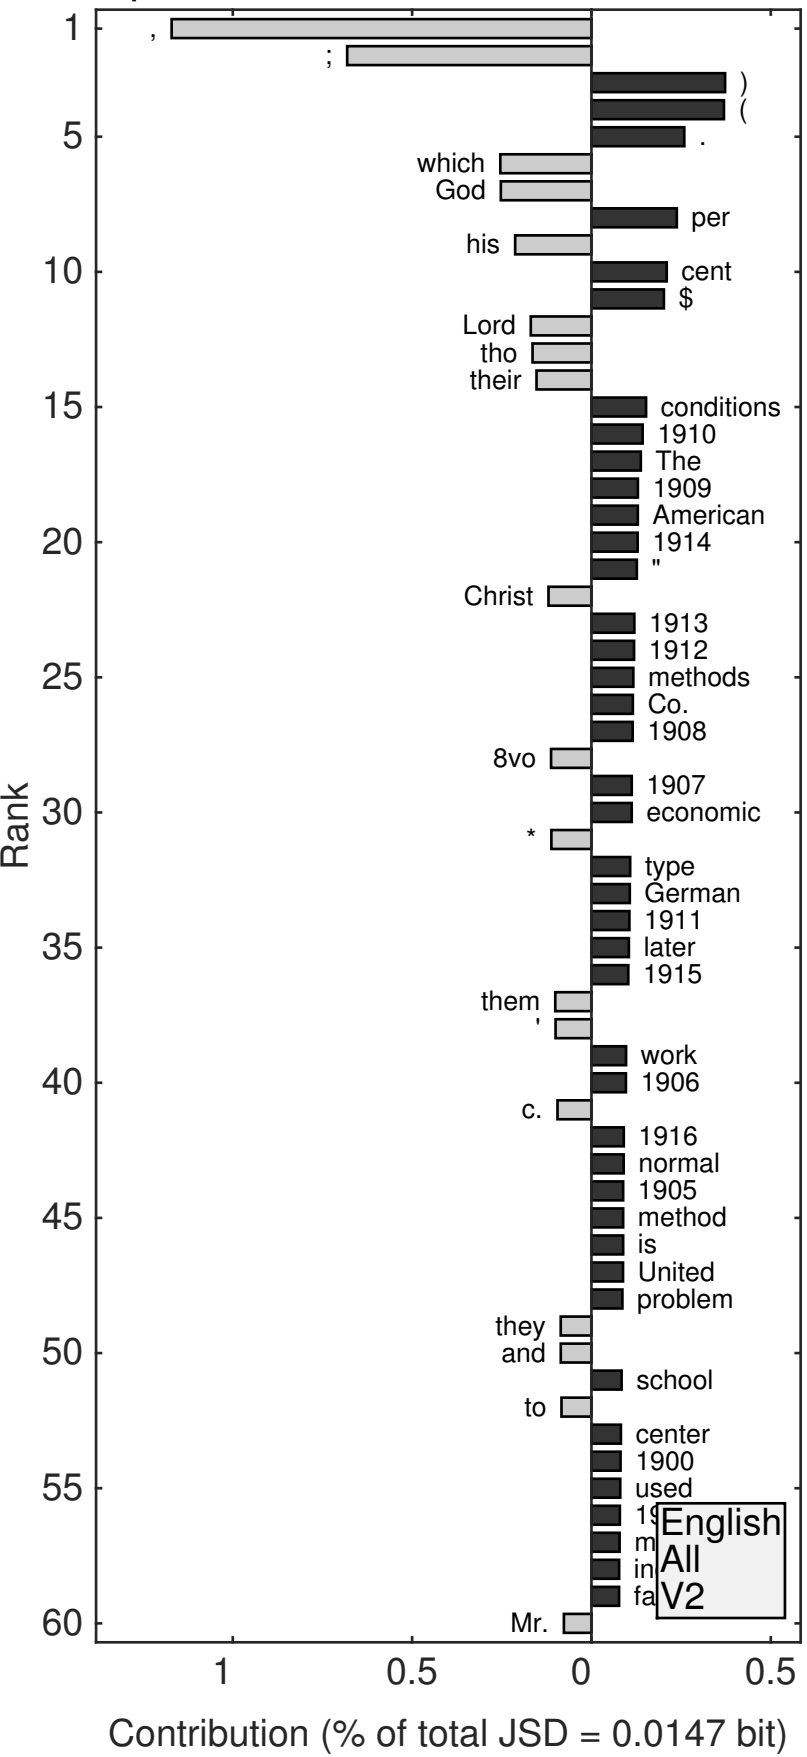

# Top JSD contributions: 1870s to 1920s

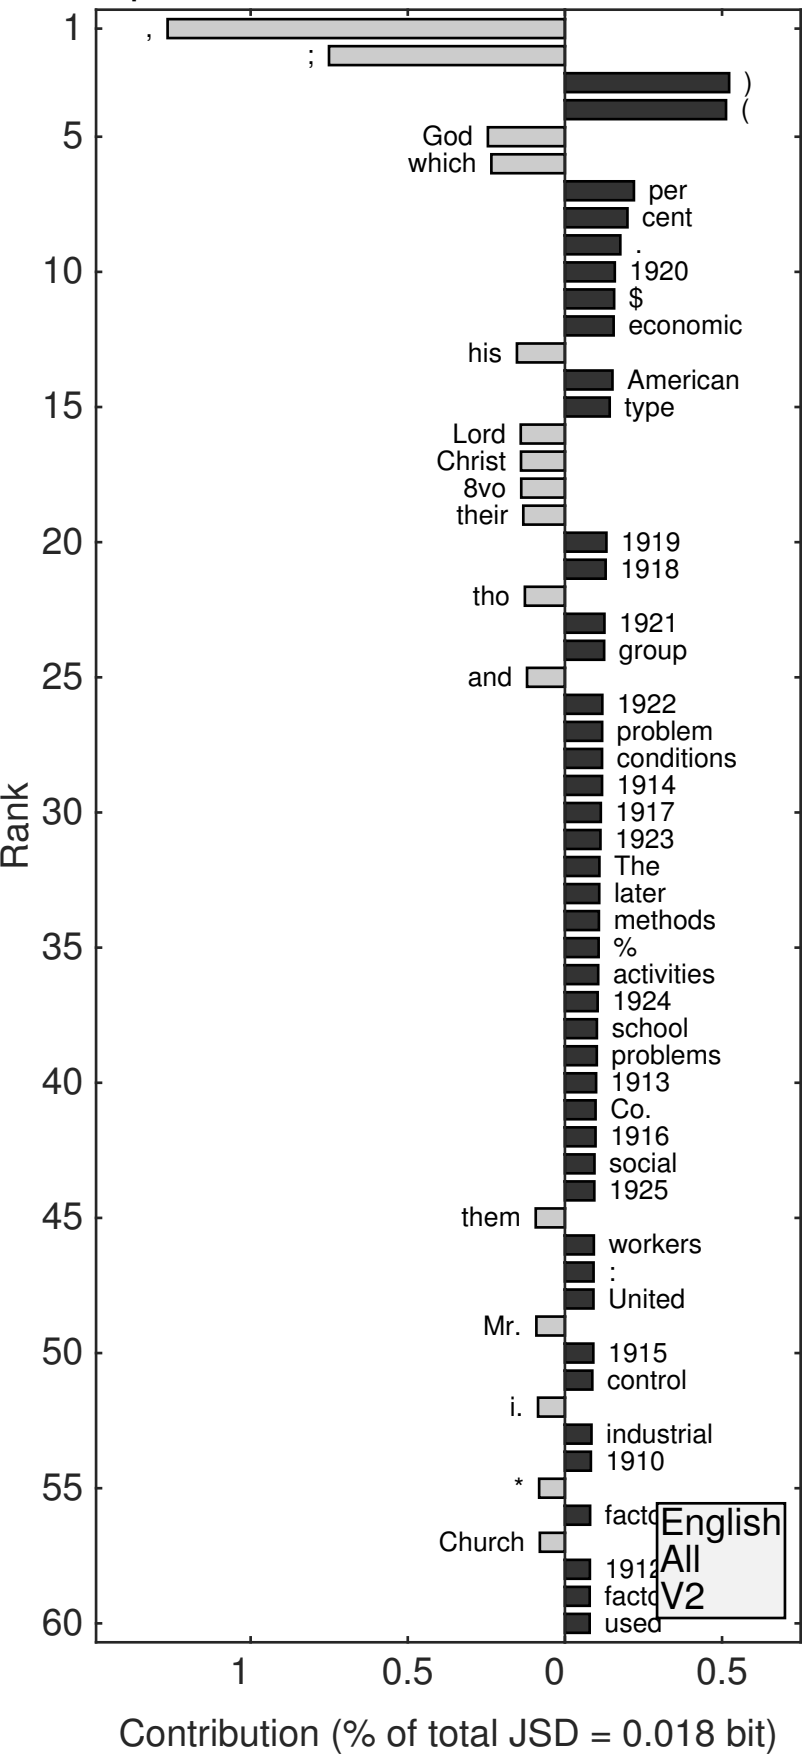

English  
All  
V2

# Top JSD contributions: 1870s to 1930s

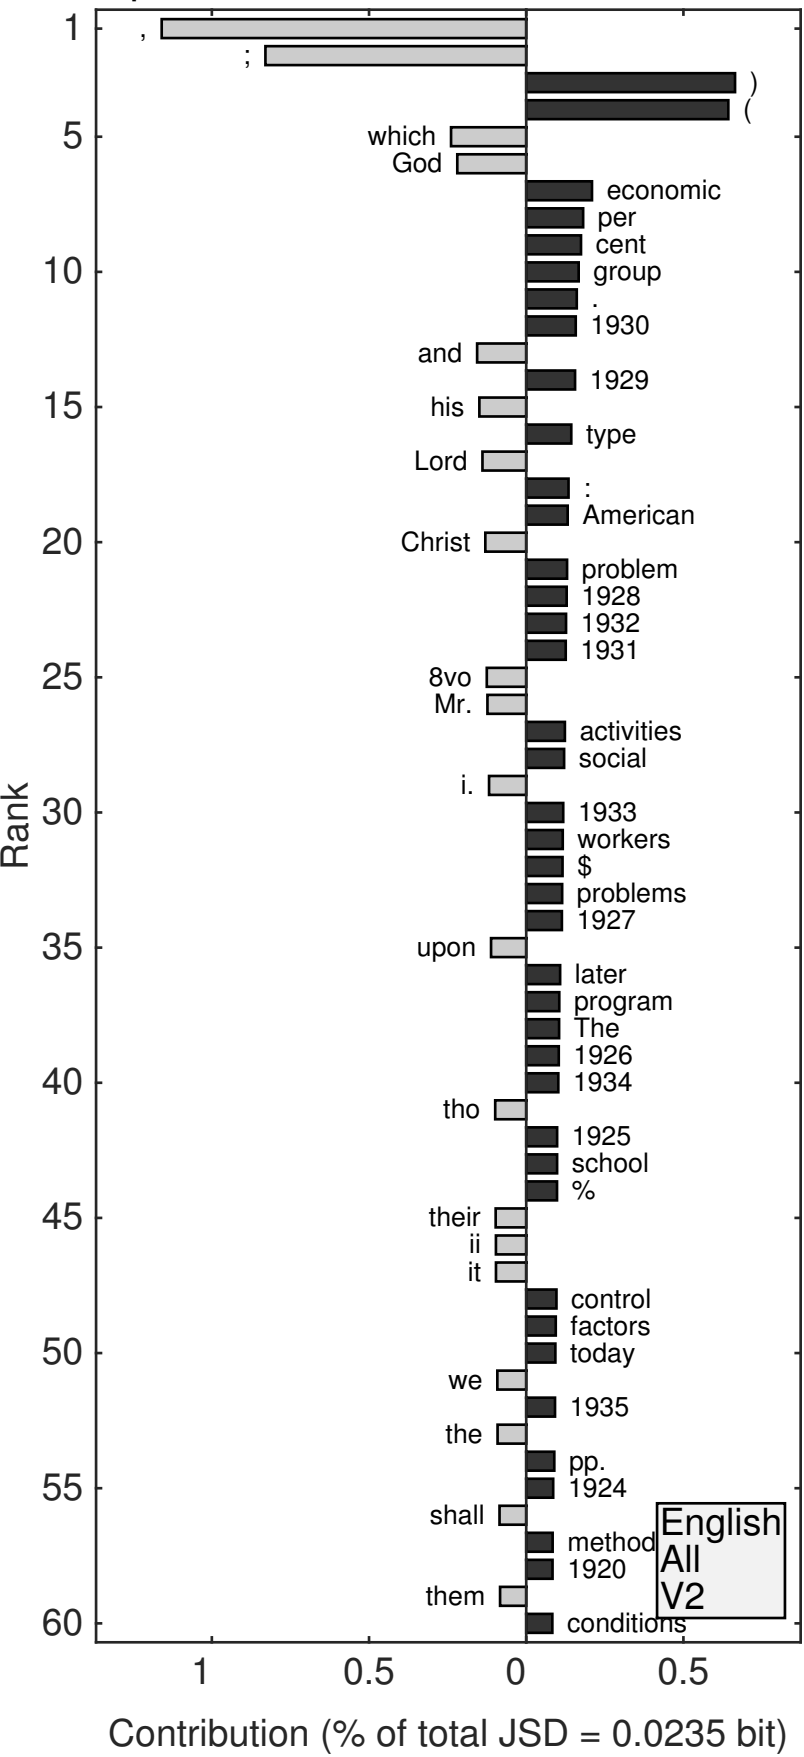

English  
All  
V2

Contribution (% of total JSD = 0.0235 bit)

# Top JSD contributions: 1870s to 1940s

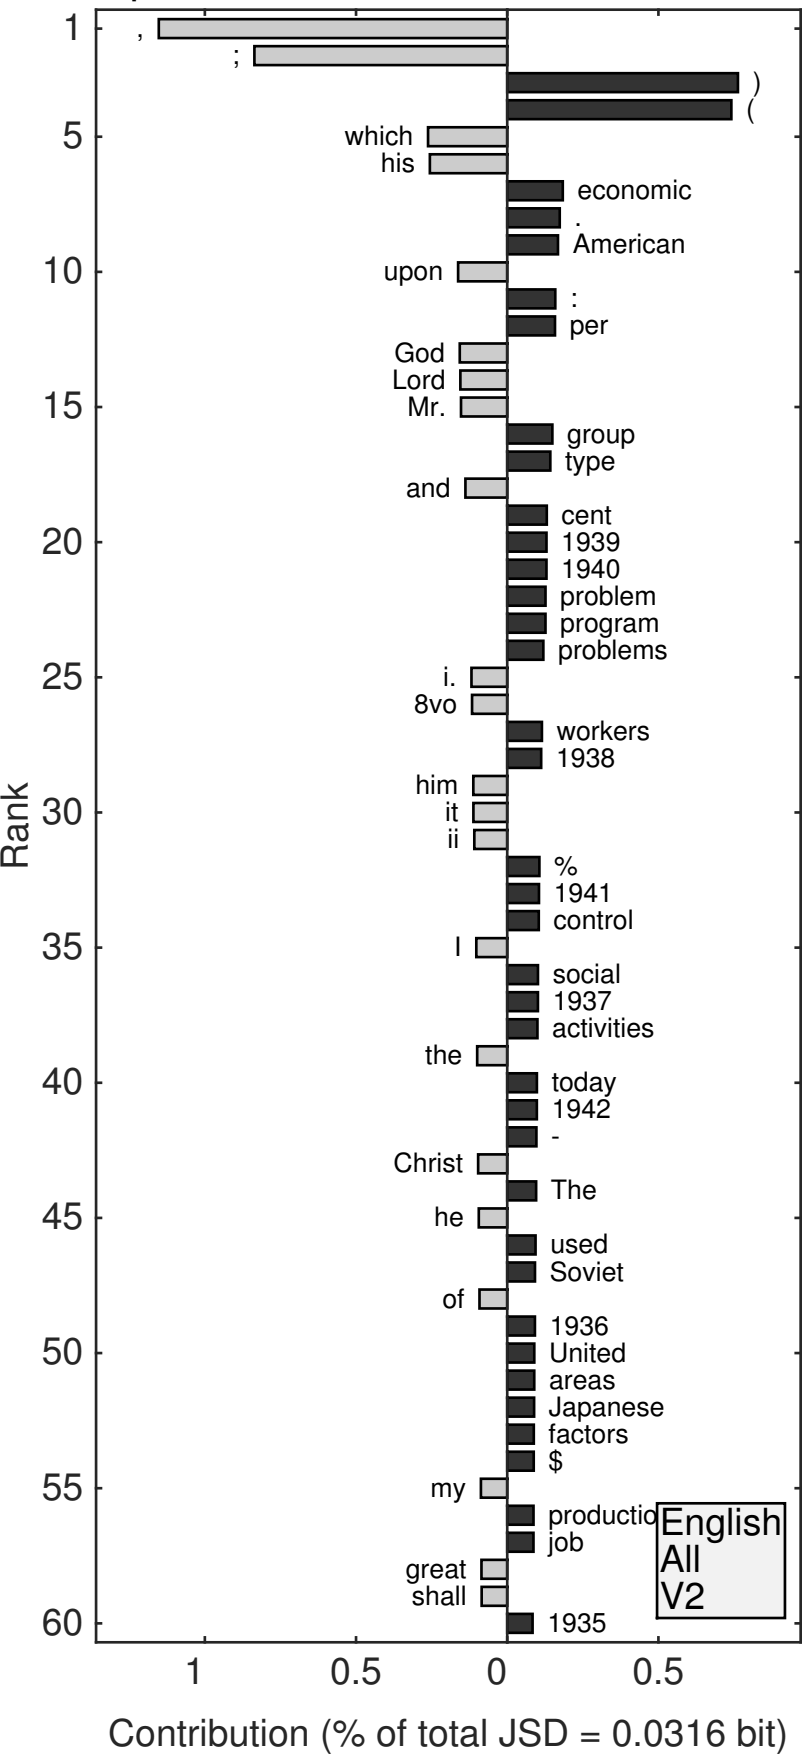

# Top JSD contributions: 1870s to 1950s

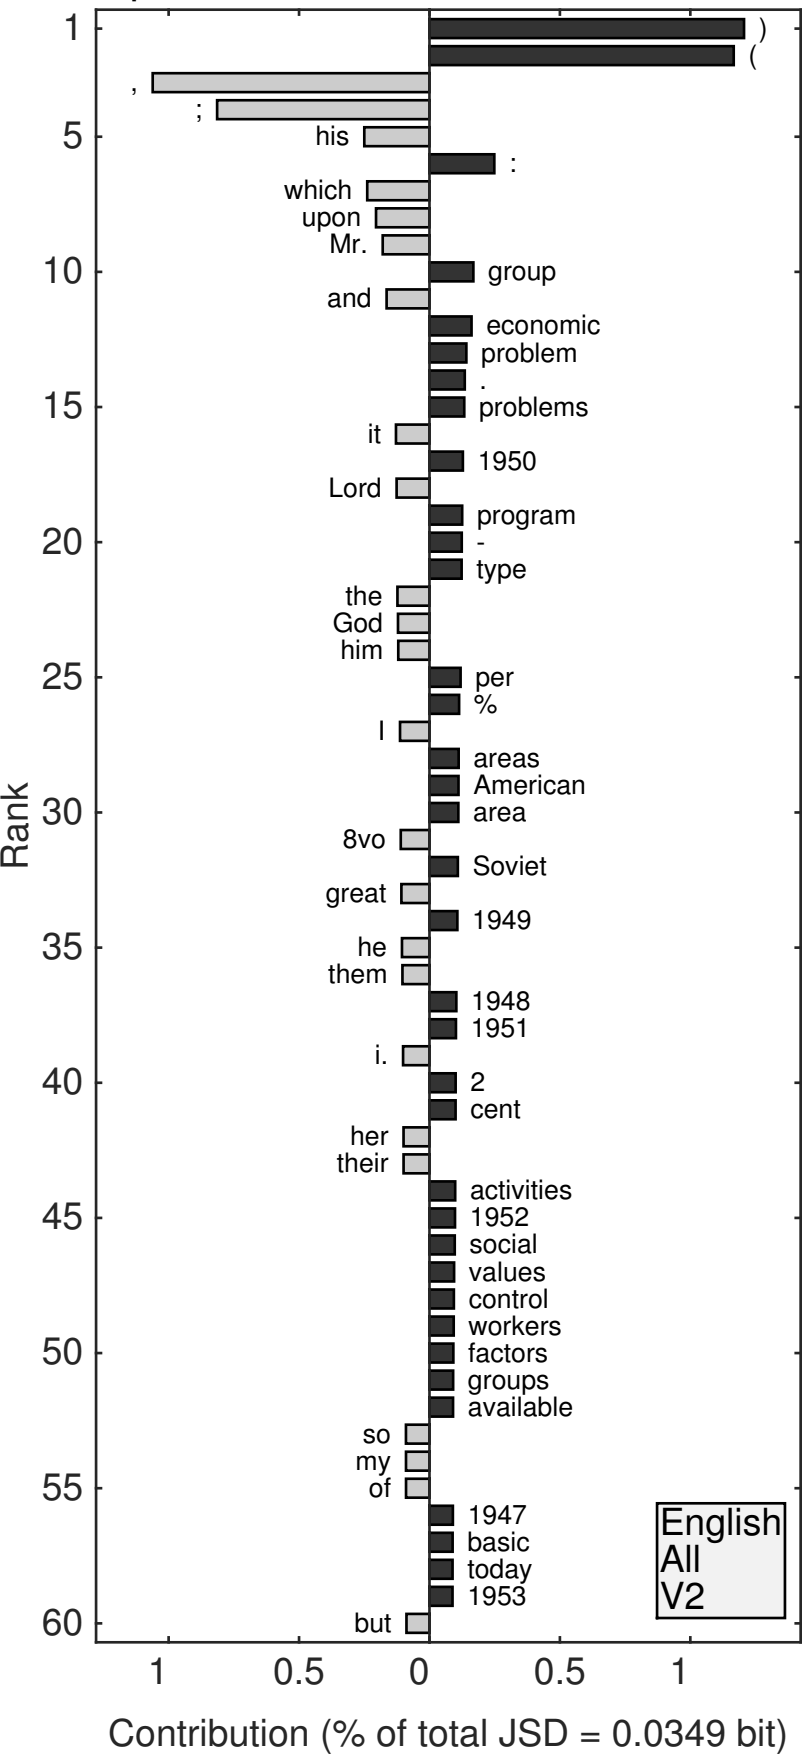



# Top JSD contributions: 1870s to 1960s

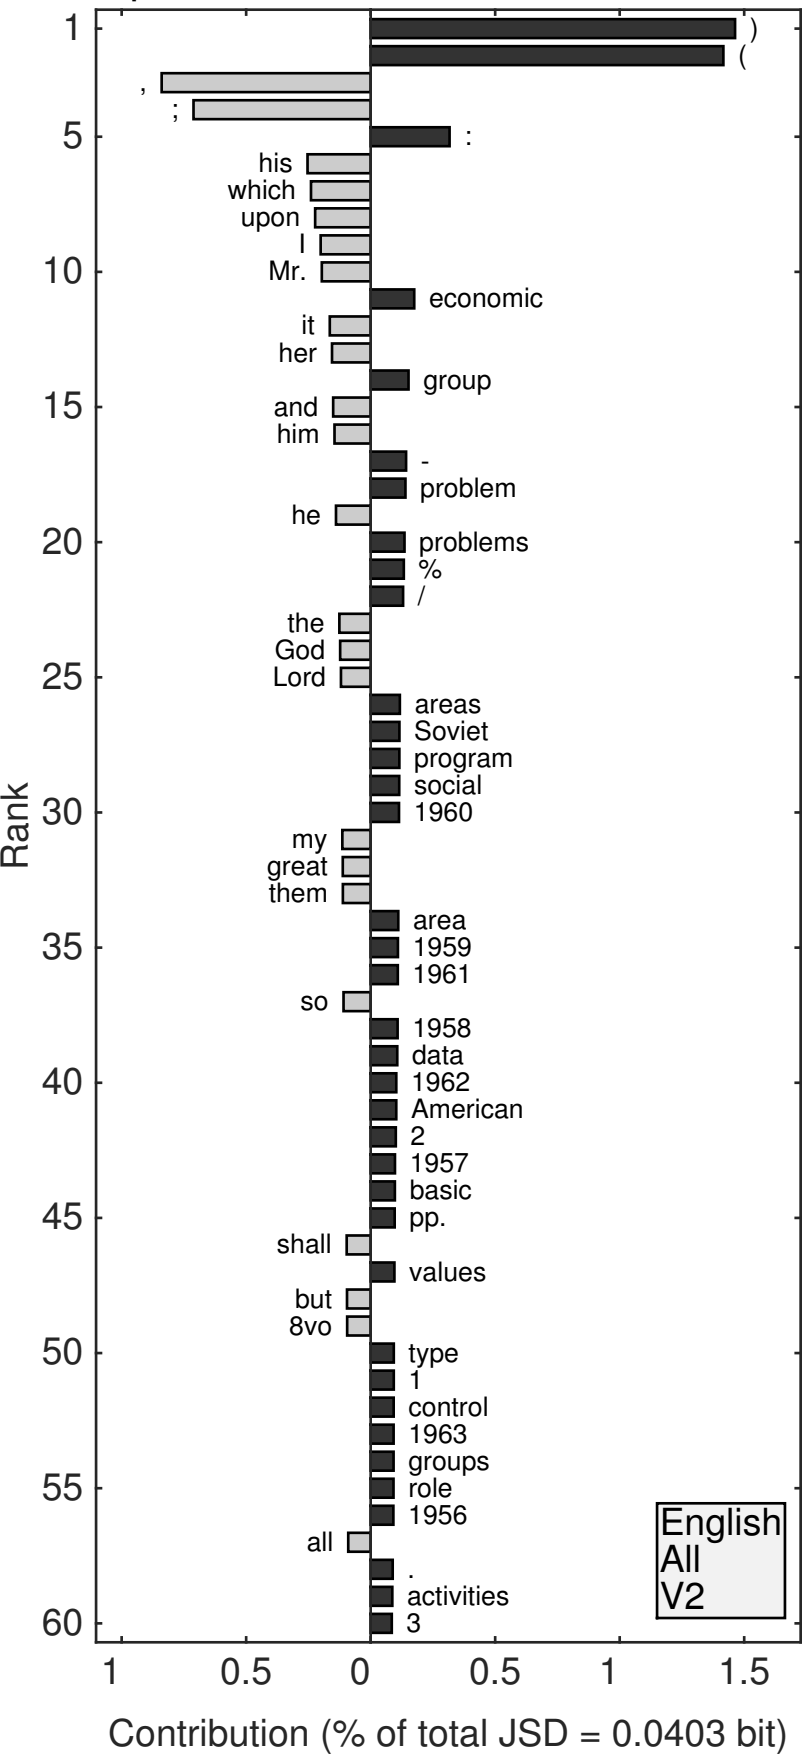

# Top JSD contributions: 1870s to 1970s

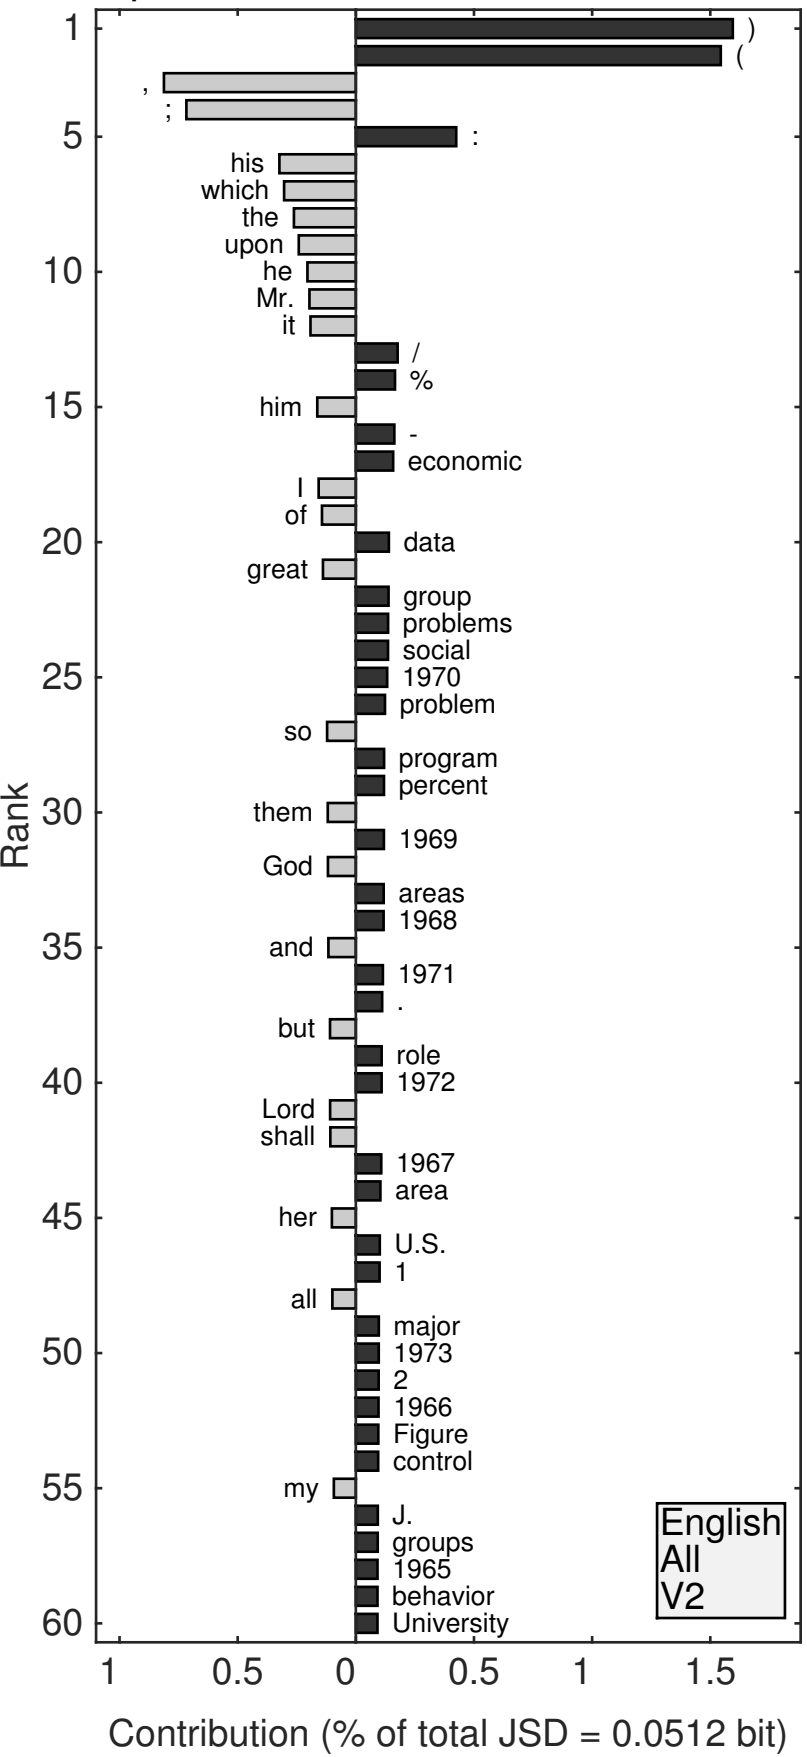

# Top JSD contributions: 1870s to 1980s

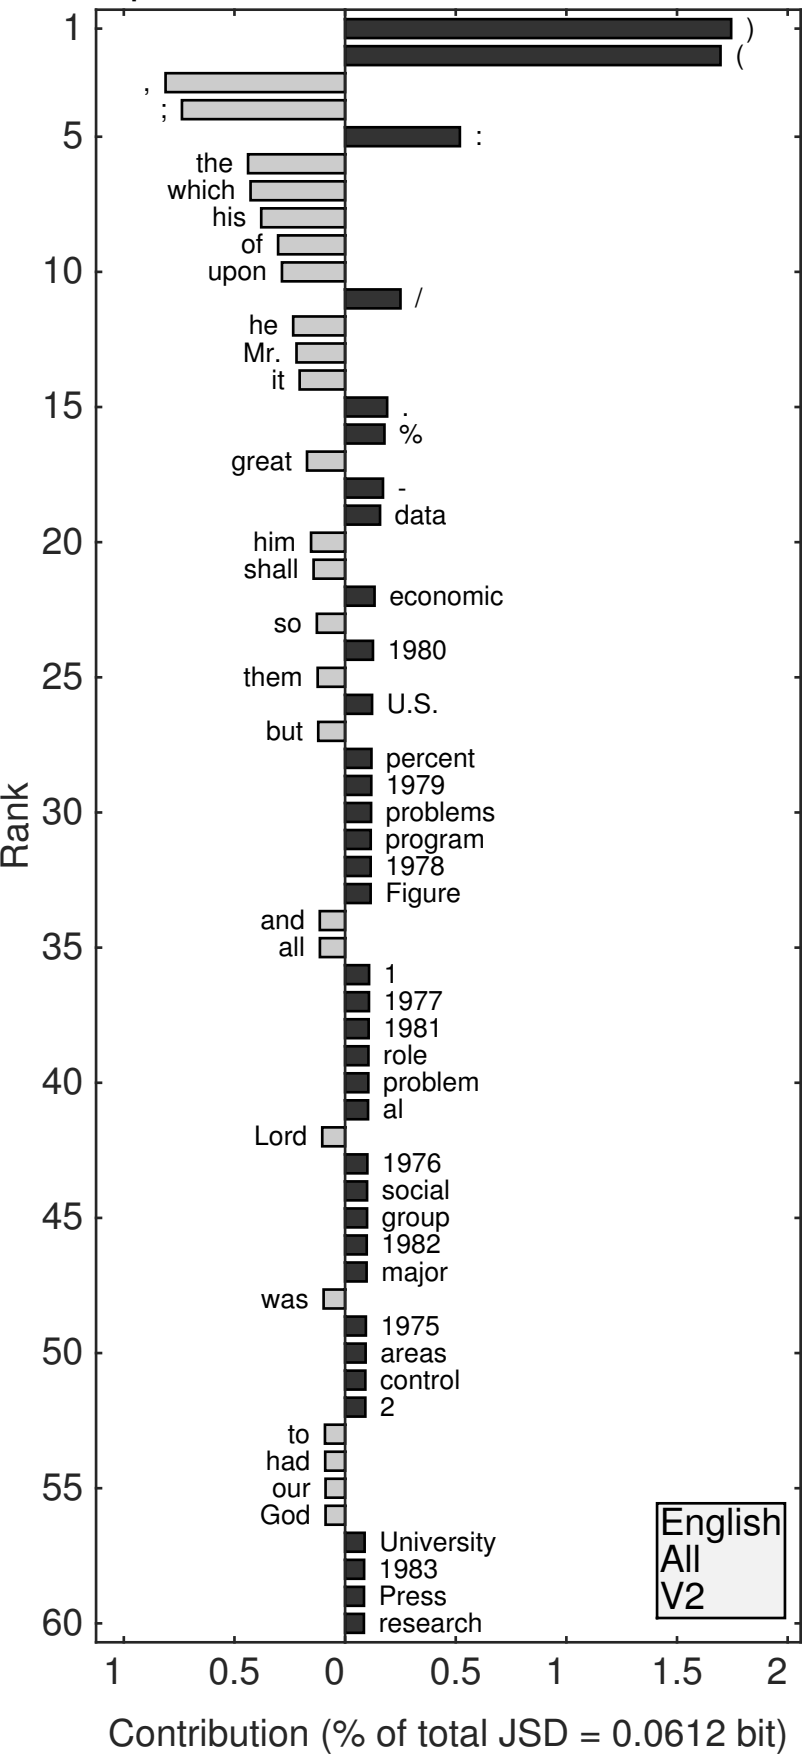

# Top JSD contributions: 1870s to 1990s

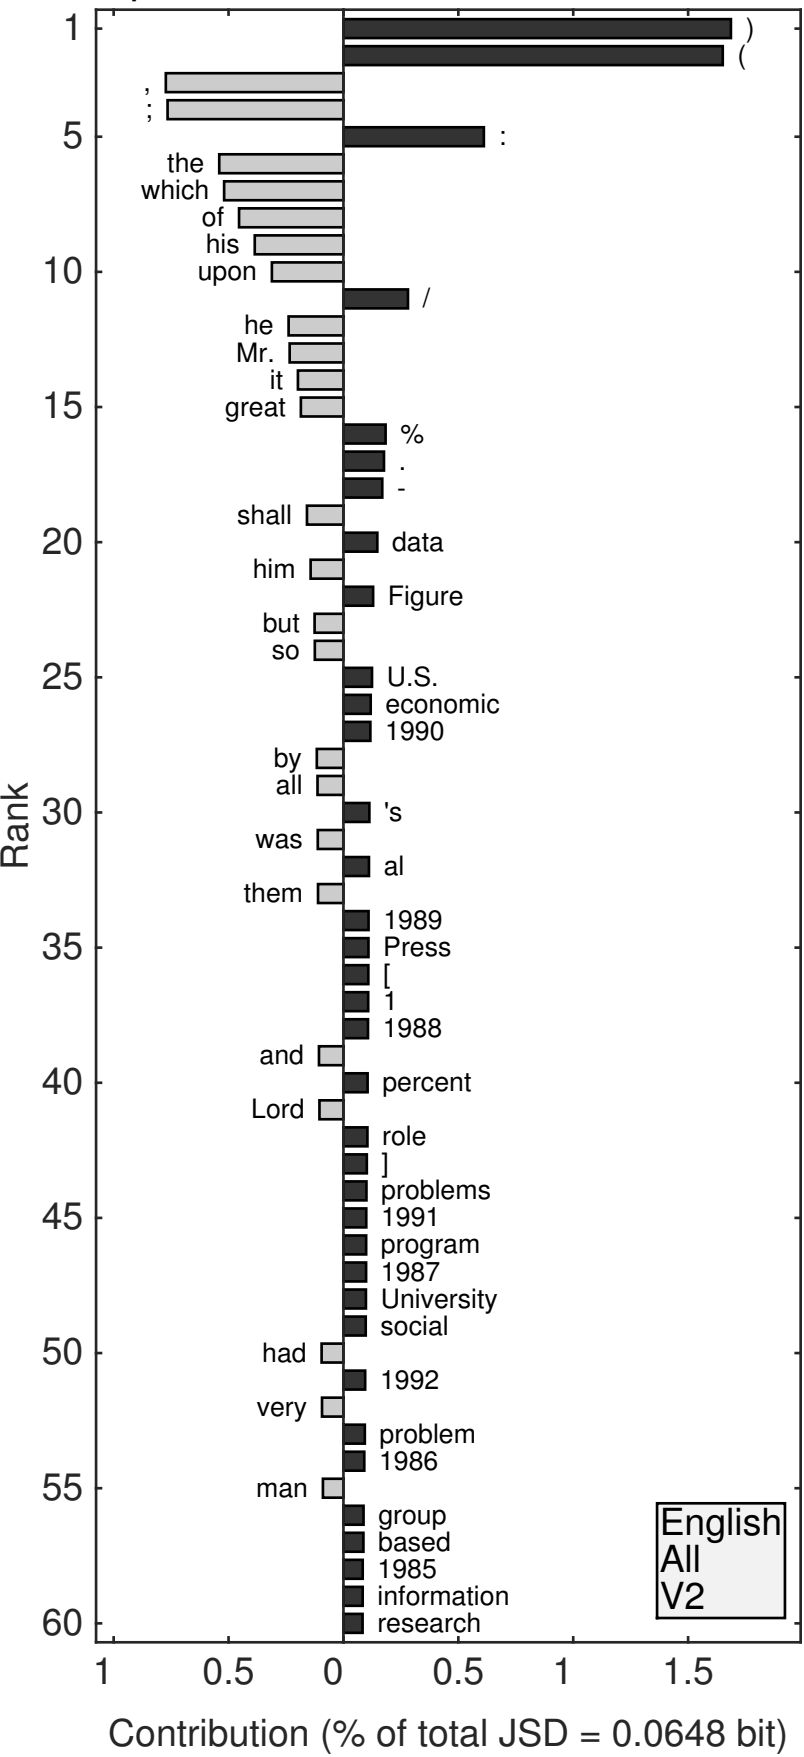

# Top JSD contributions: 1880s to 1890s

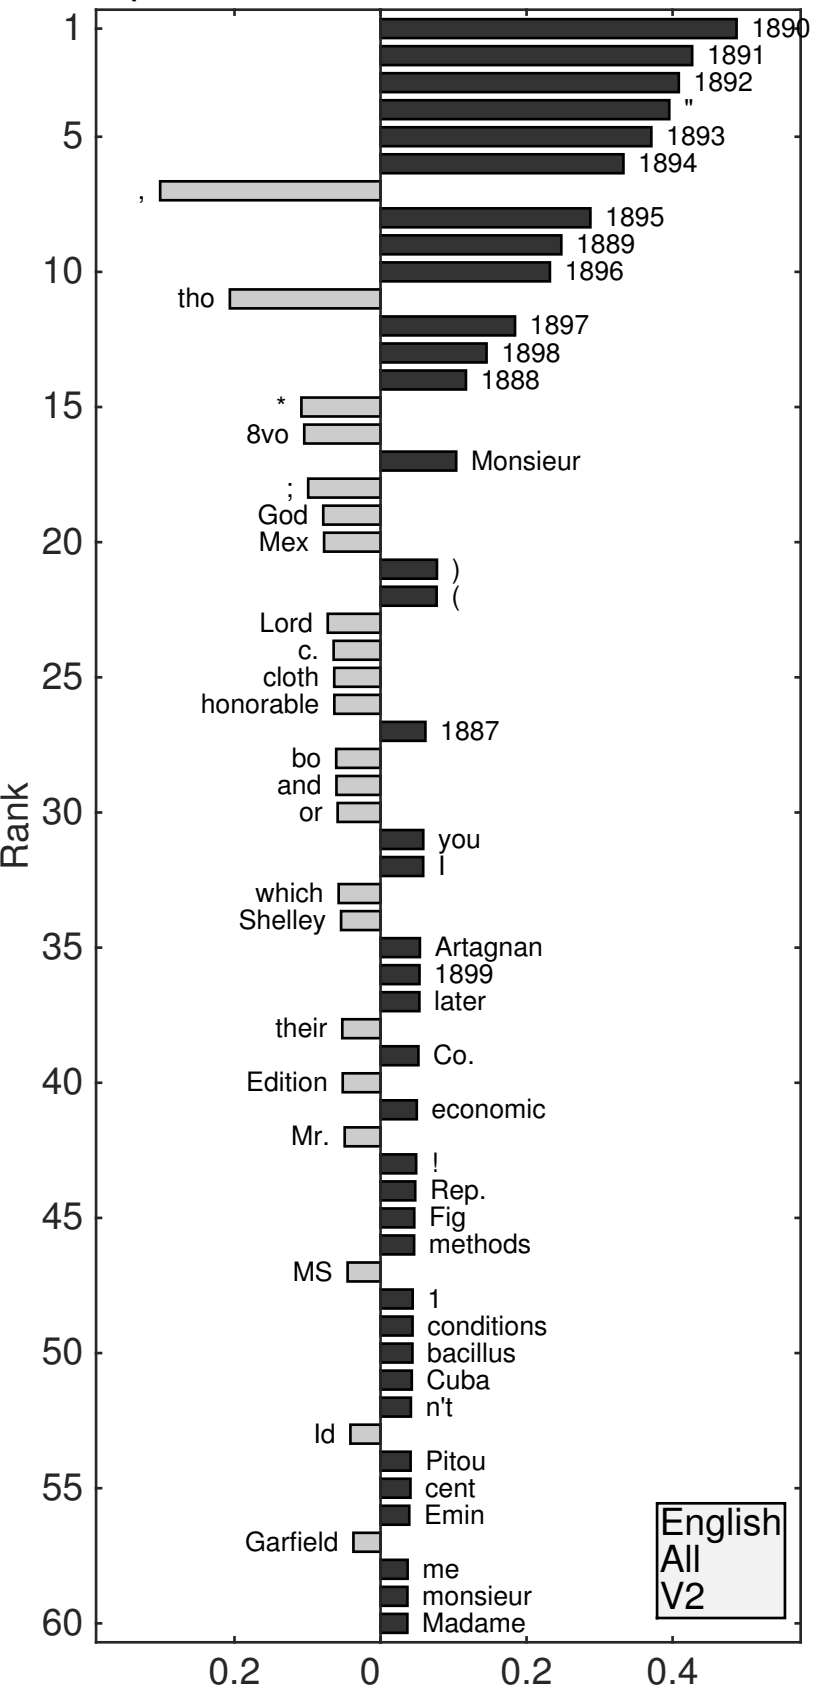

Contribution (% of total JSD = 0.00236 bit)

# Top JSD contributions: 1880s to 1900s

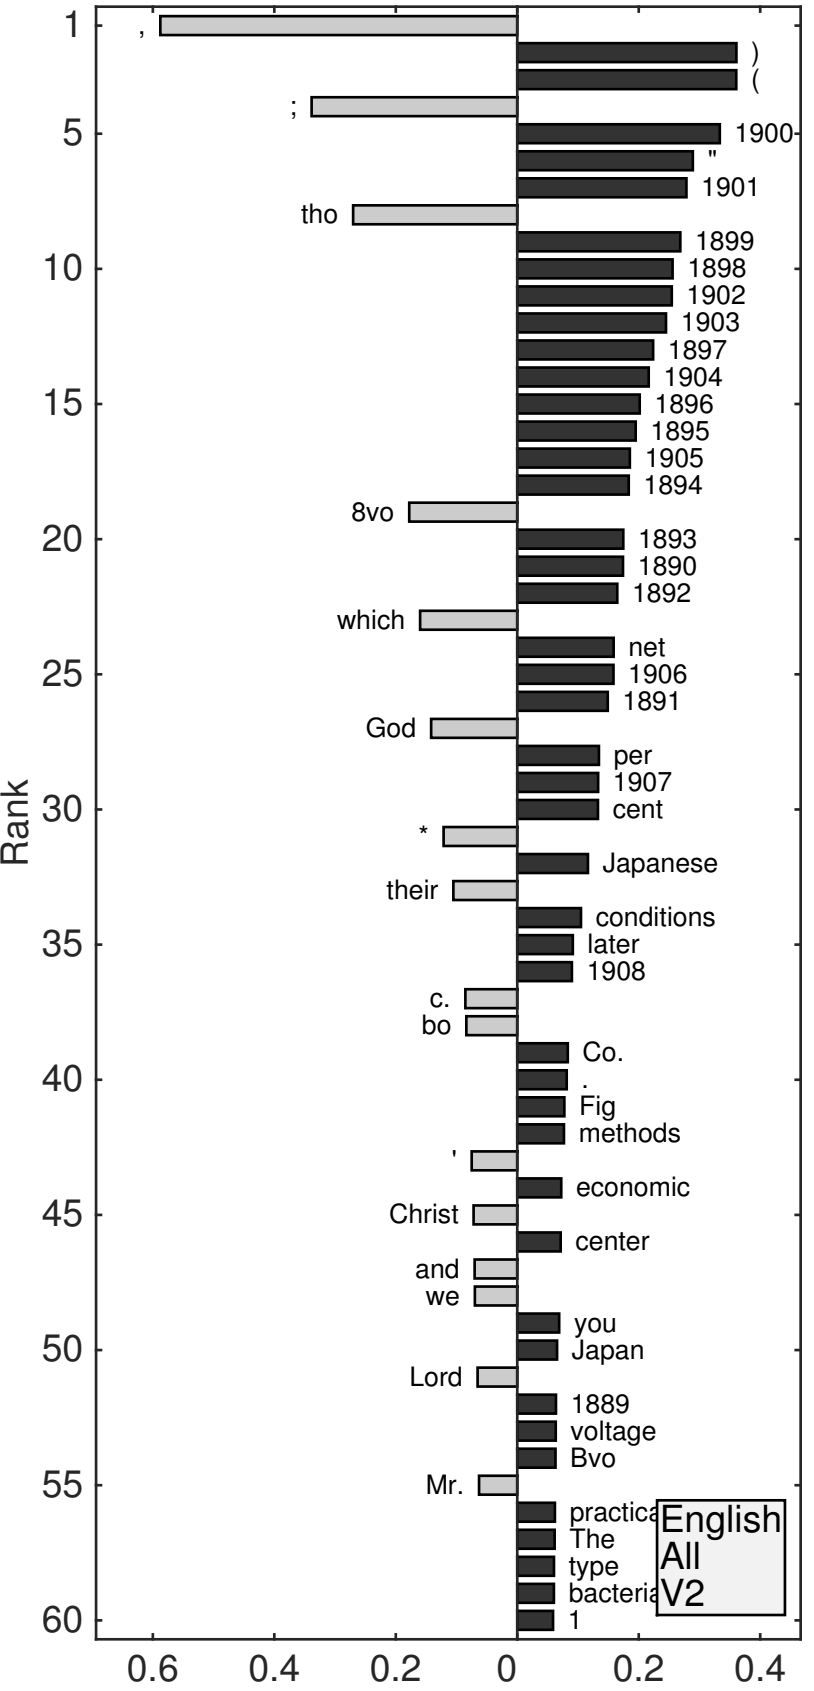

Contribution (% of total JSD = 0.00471 bit)

# Top JSD contributions: 1880s to 1910s

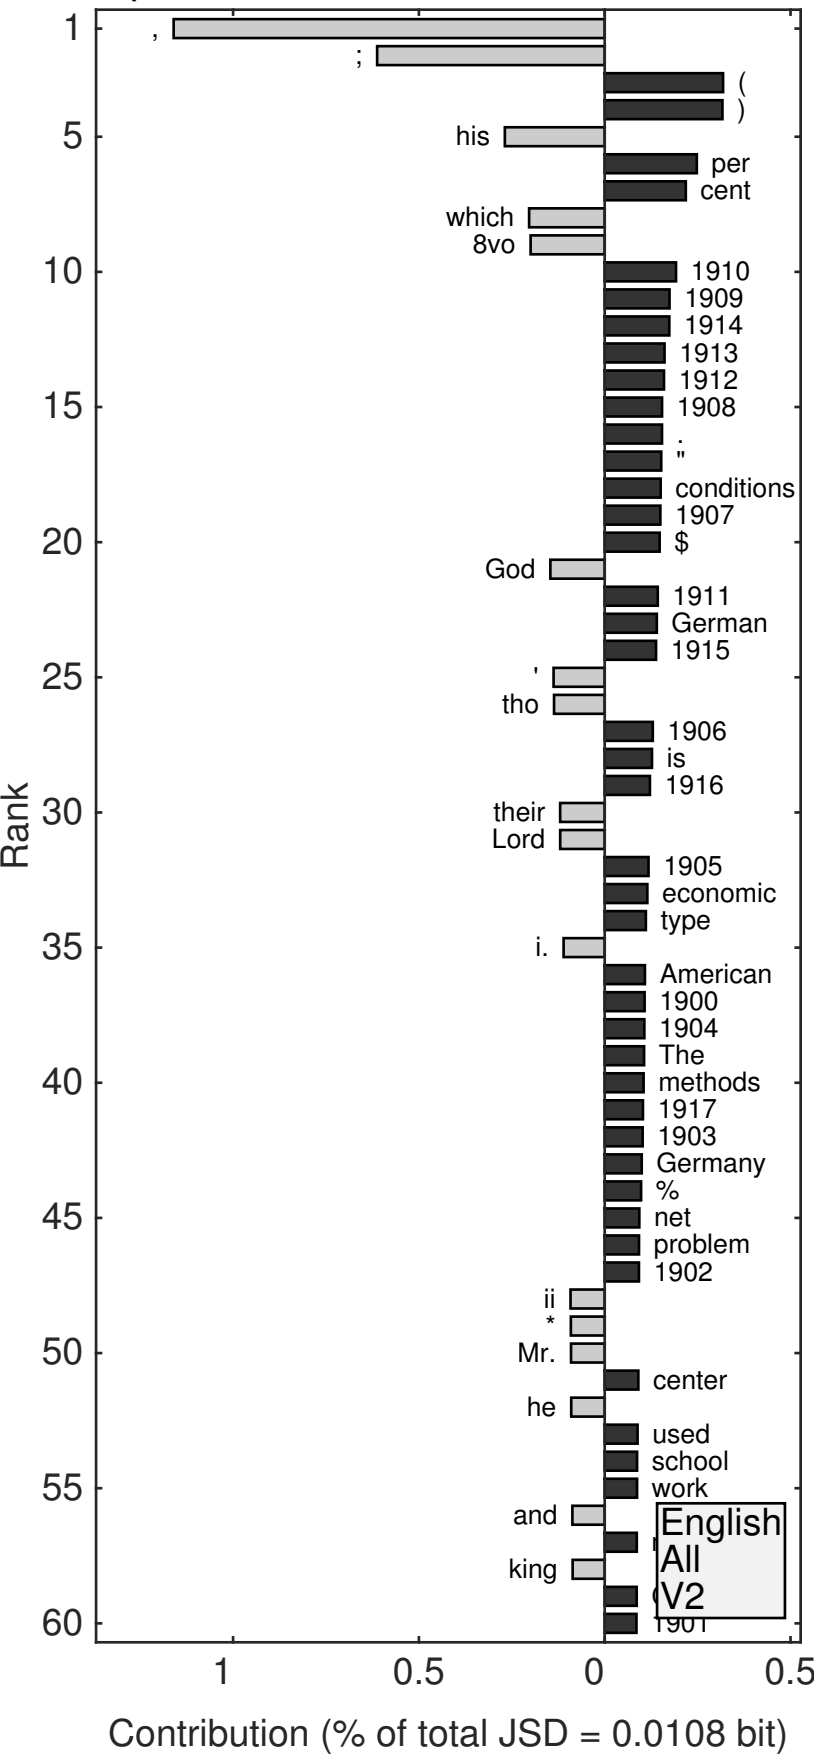

# Top JSD contributions: 1880s to 1920s

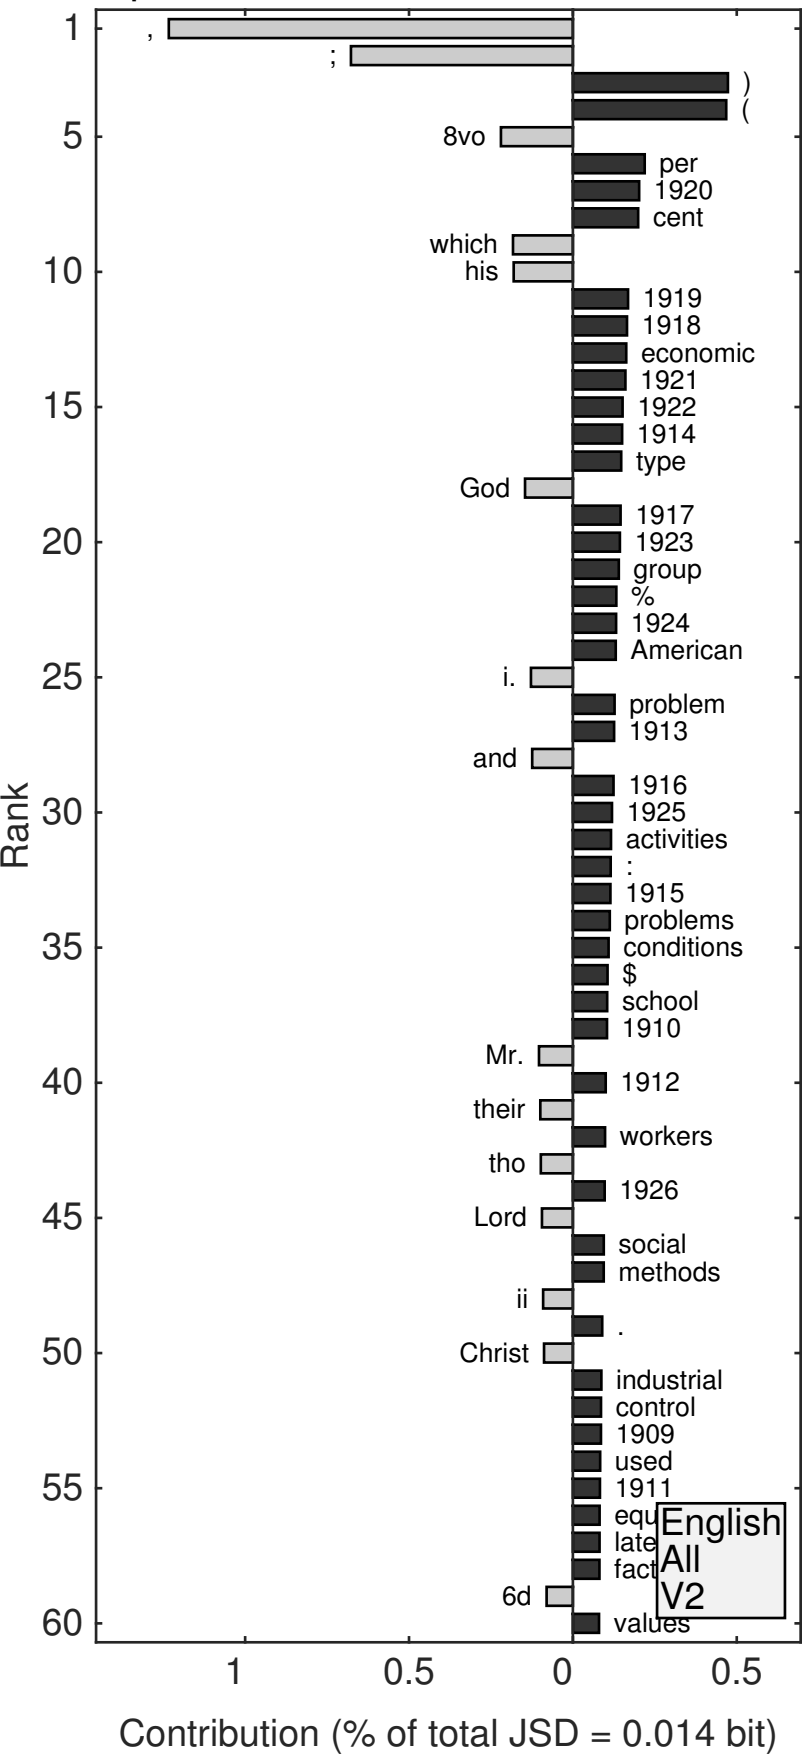



# Top JSD contributions: 1880s to 1930s

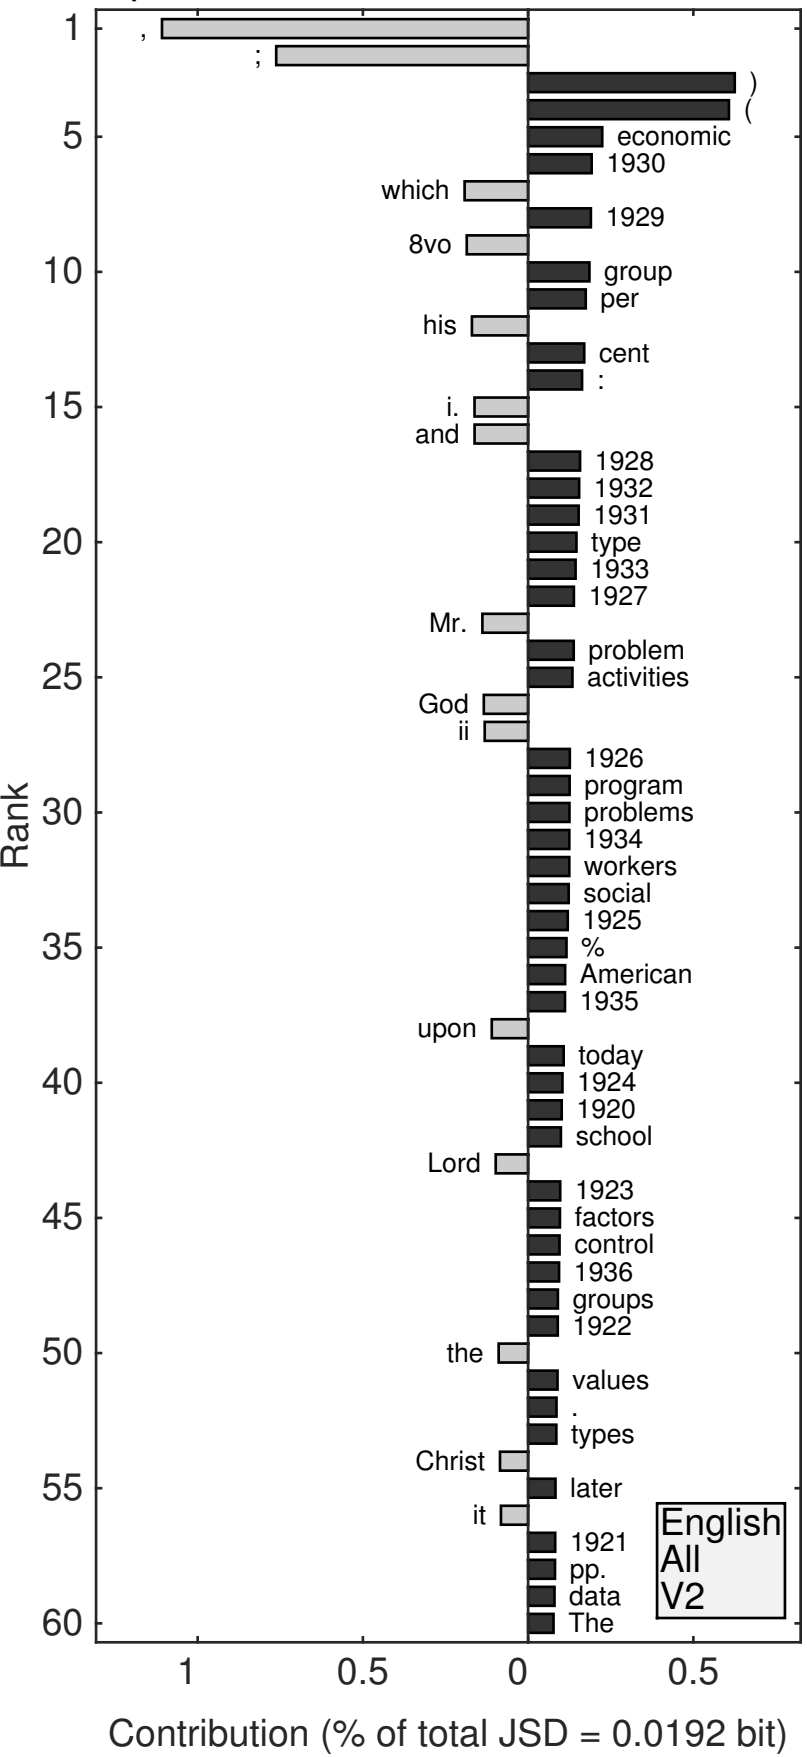

# Top JSD contributions: 1880s to 1940s

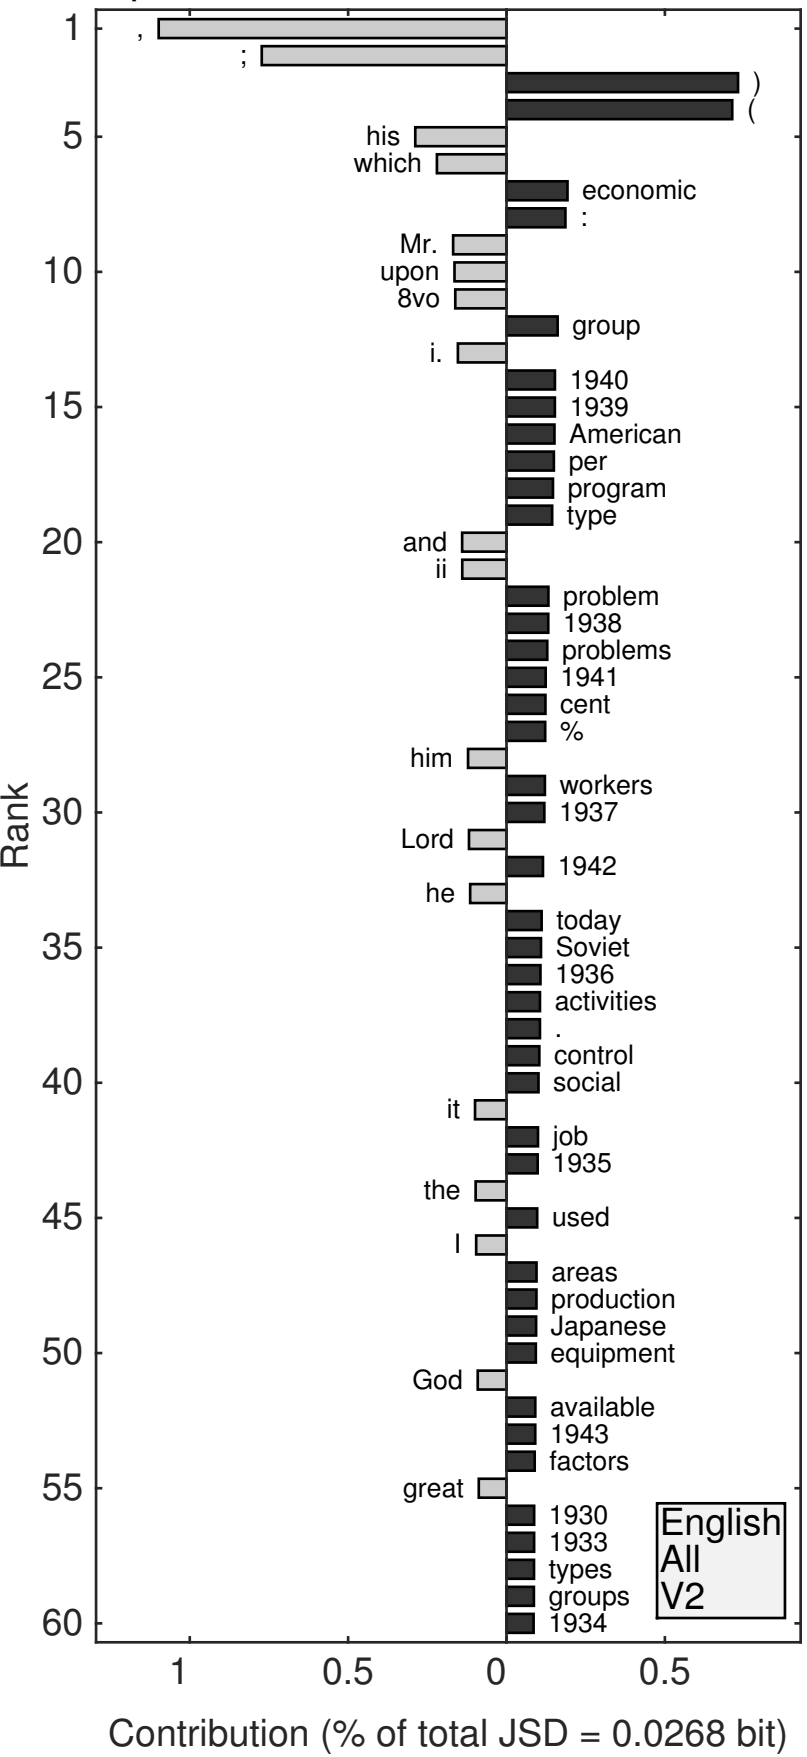

# Top JSD contributions: 1880s to 1950s

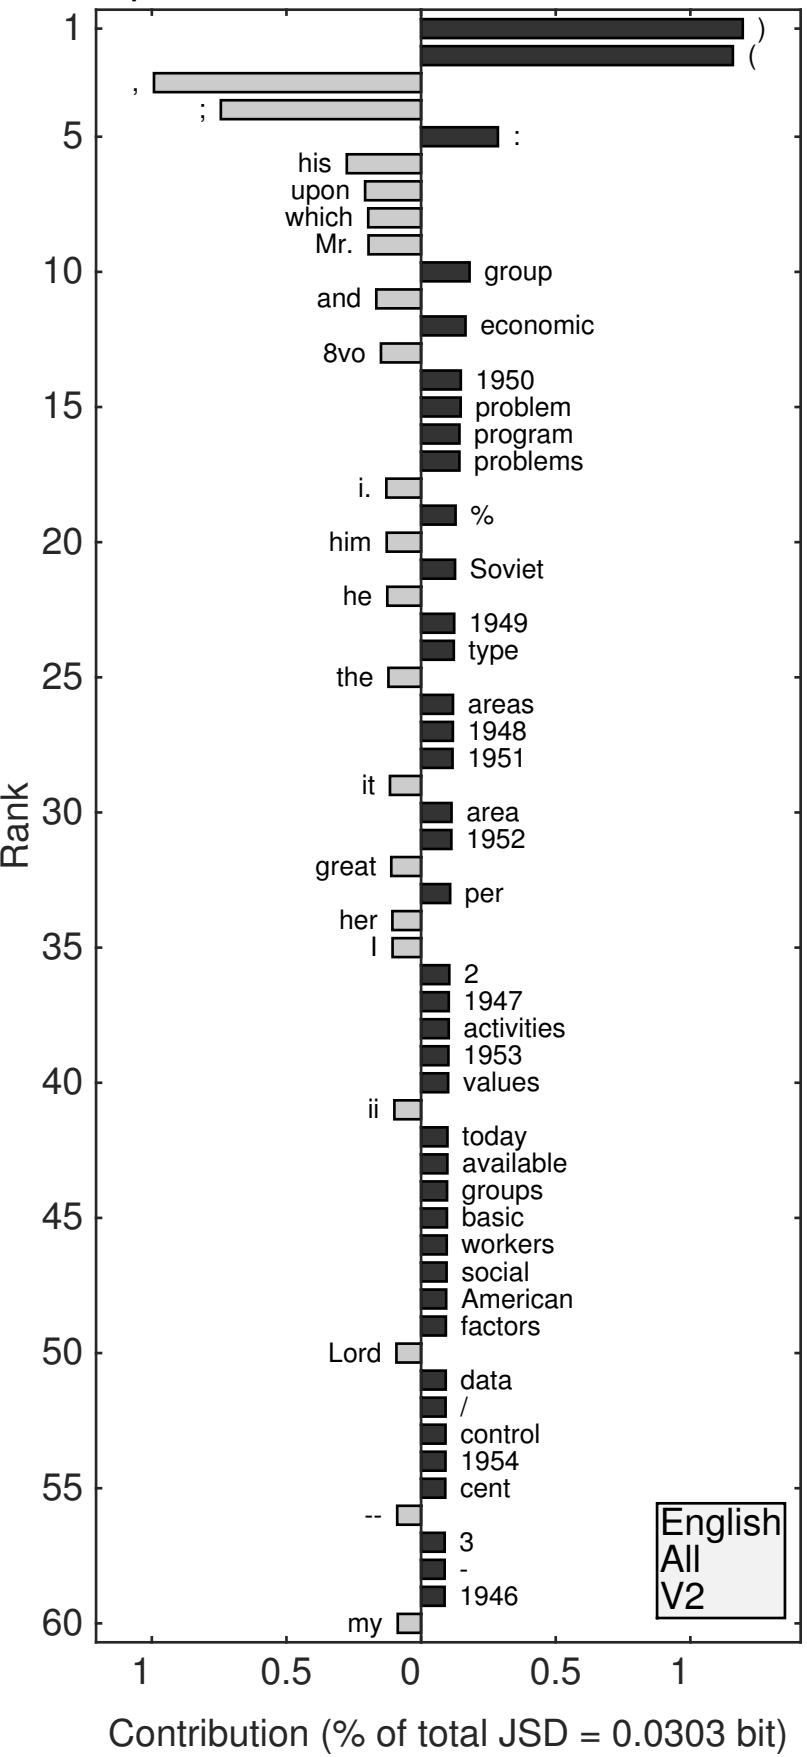

English  
All  
V2

# Top JSD contributions: 1880s to 1960s

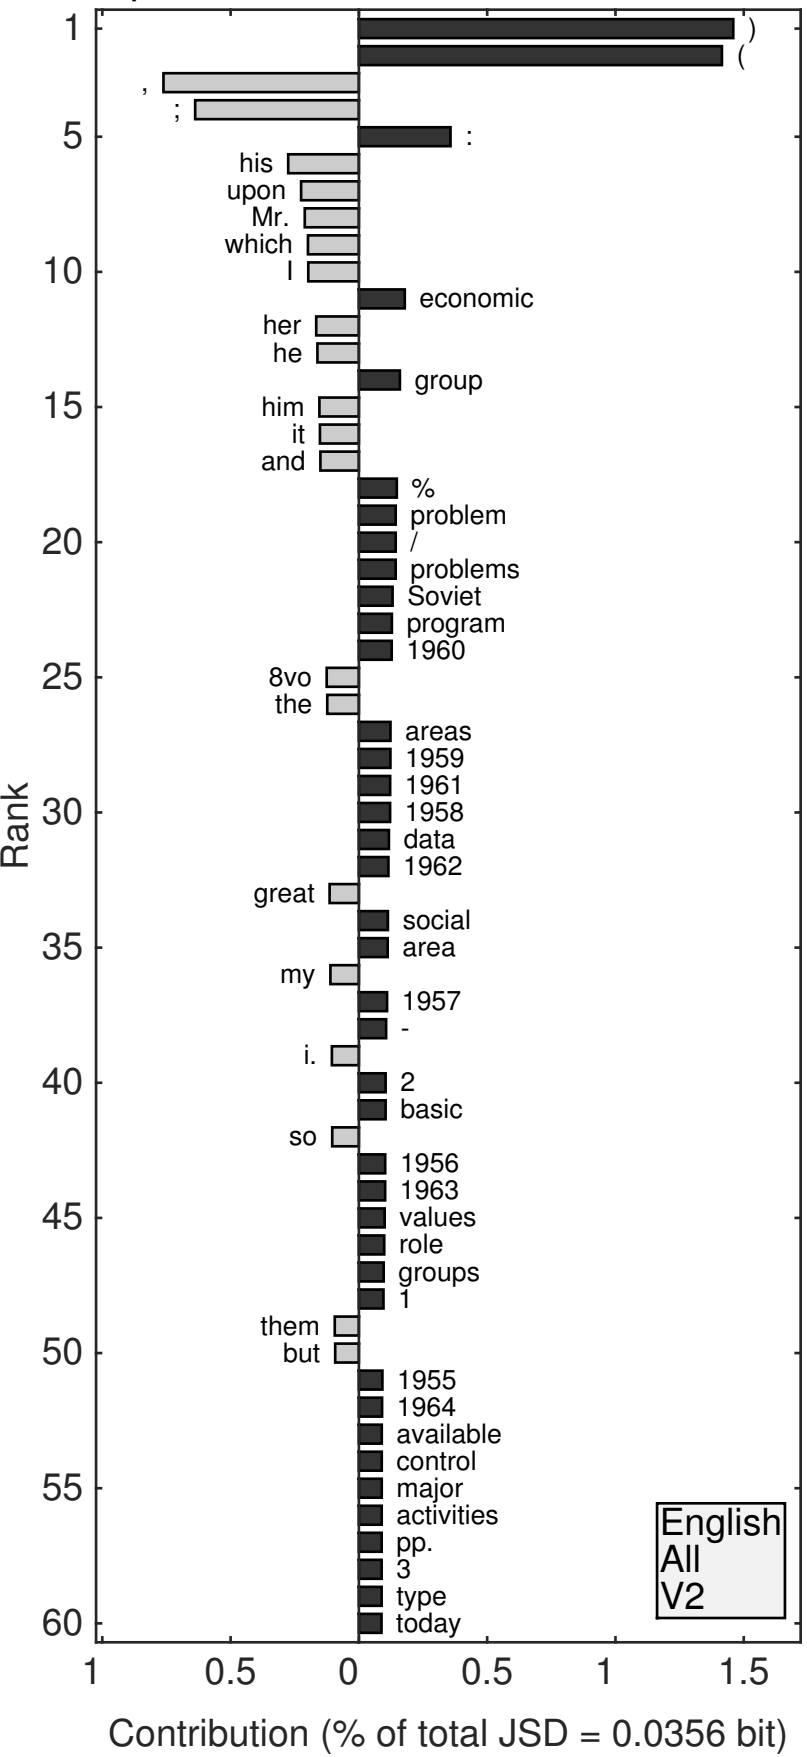

# Top JSD contributions: 1880s to 1970s

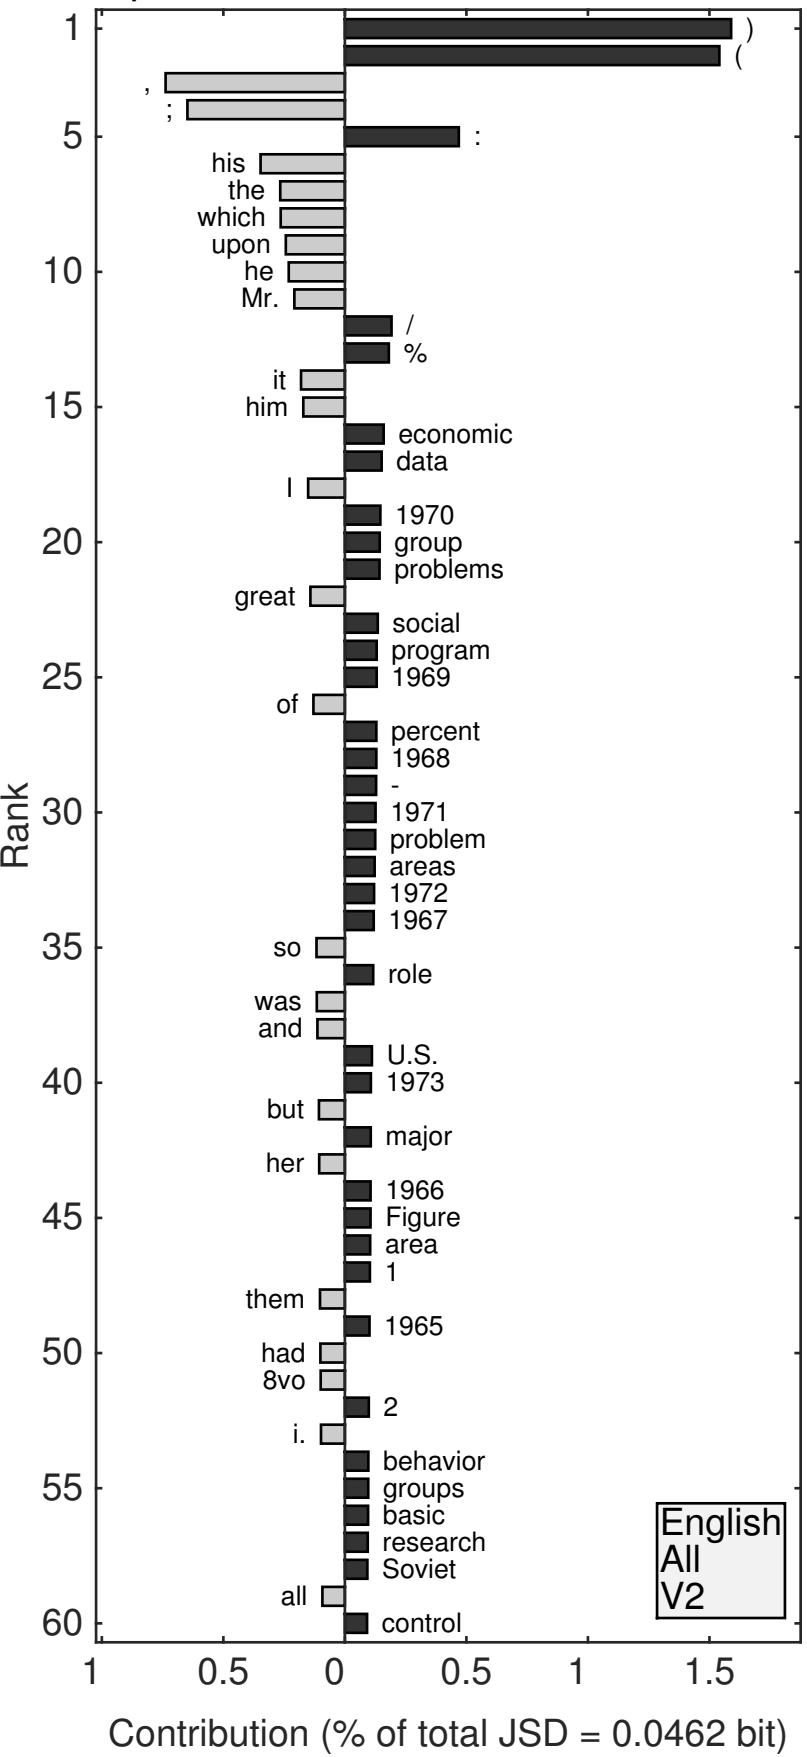

# Top JSD contributions: 1880s to 1980s

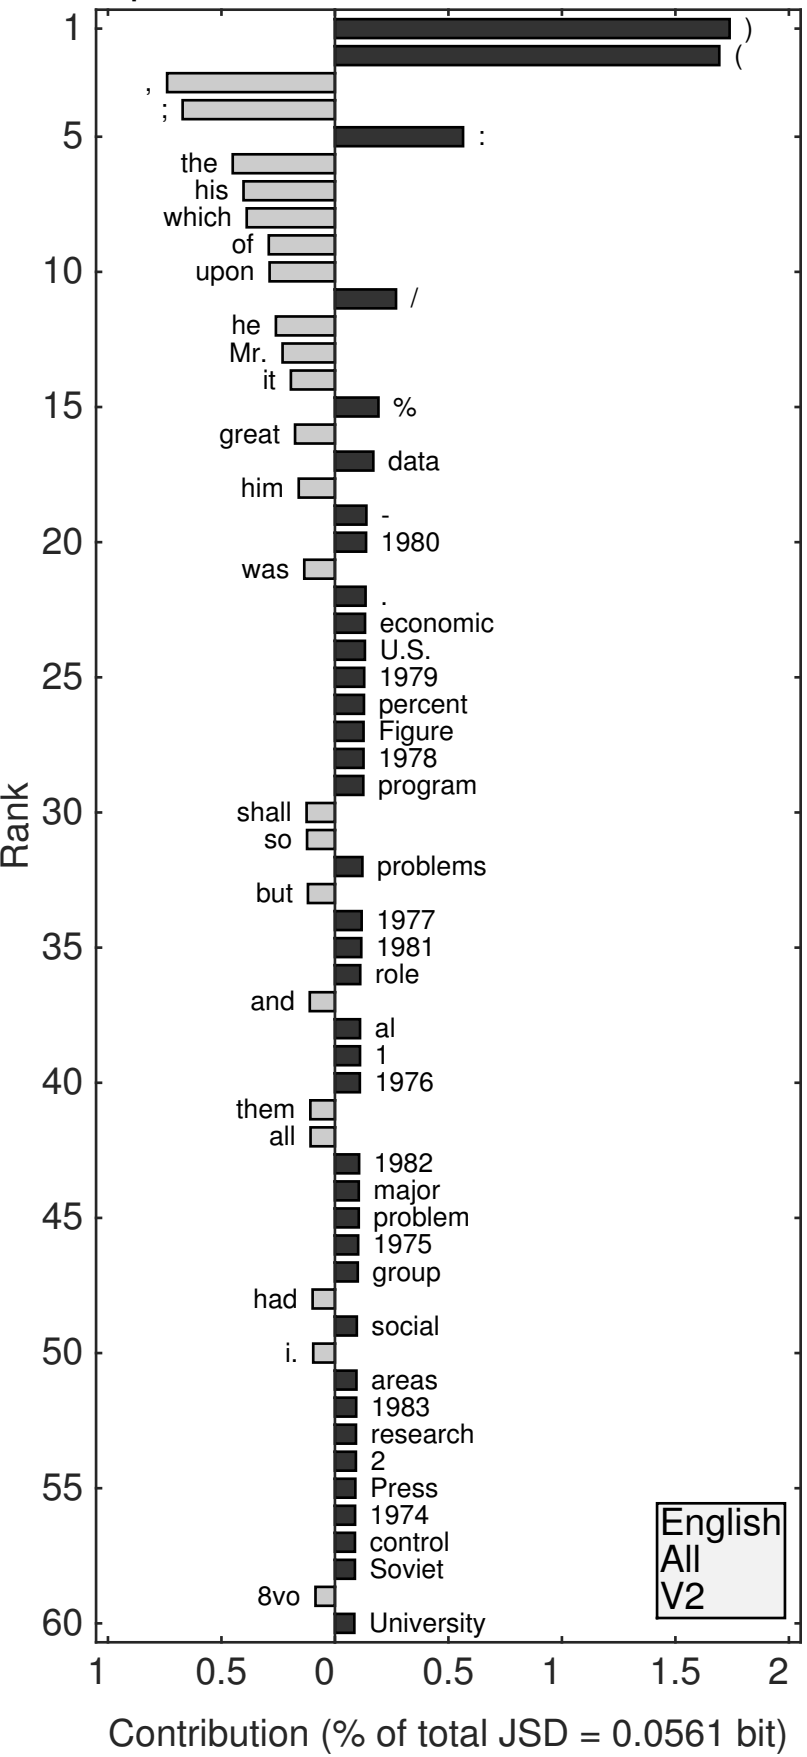

# Top JSD contributions: 1880s to 1990s

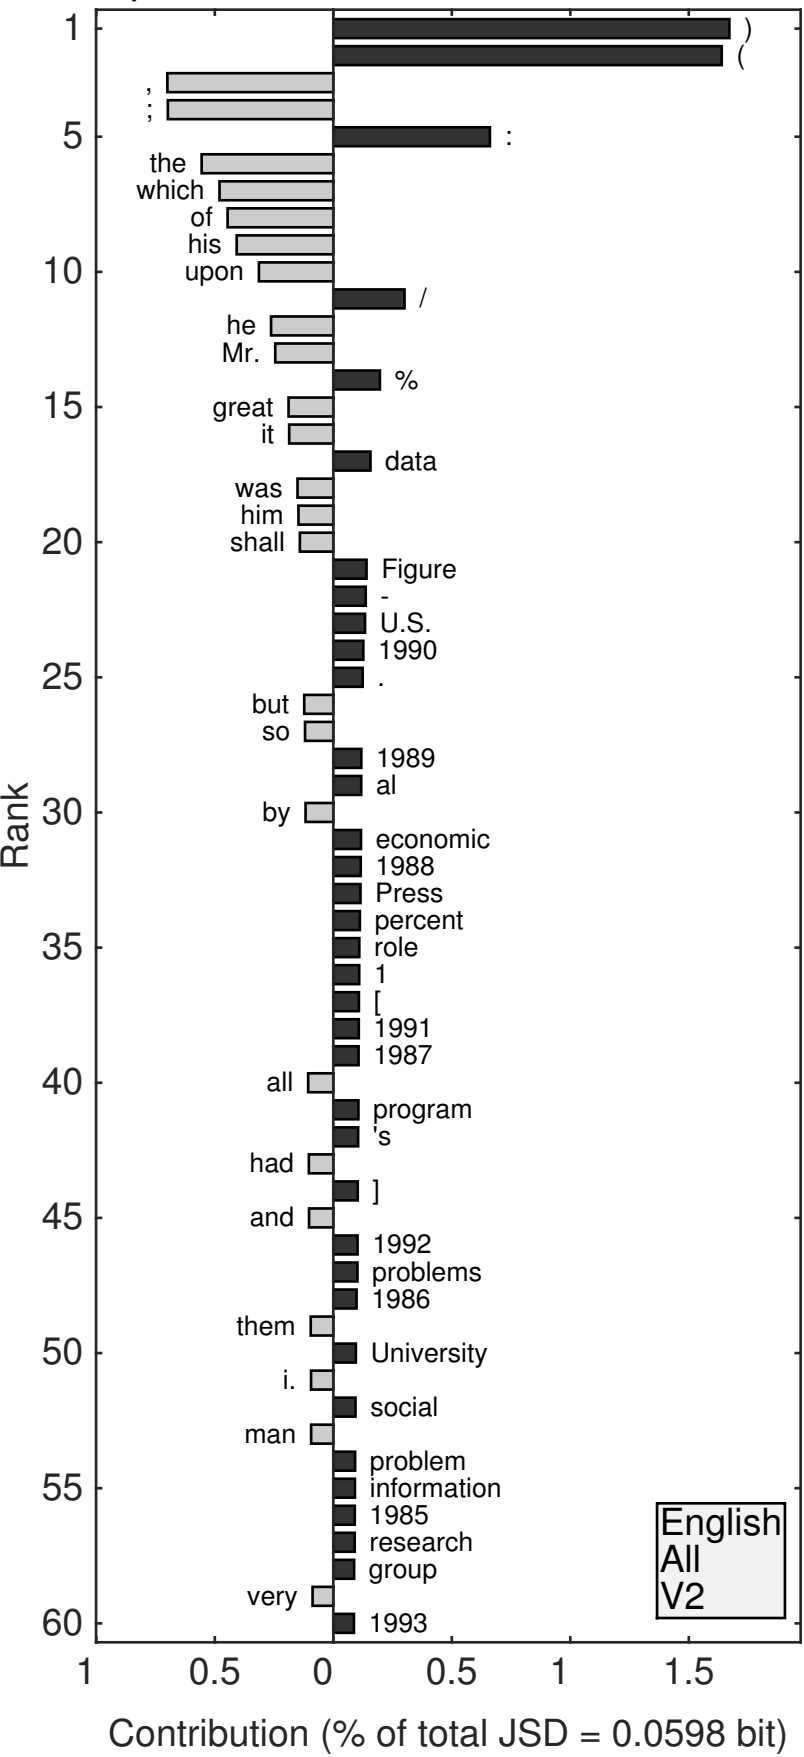

# Top JSD contributions: 1890s to 1900s

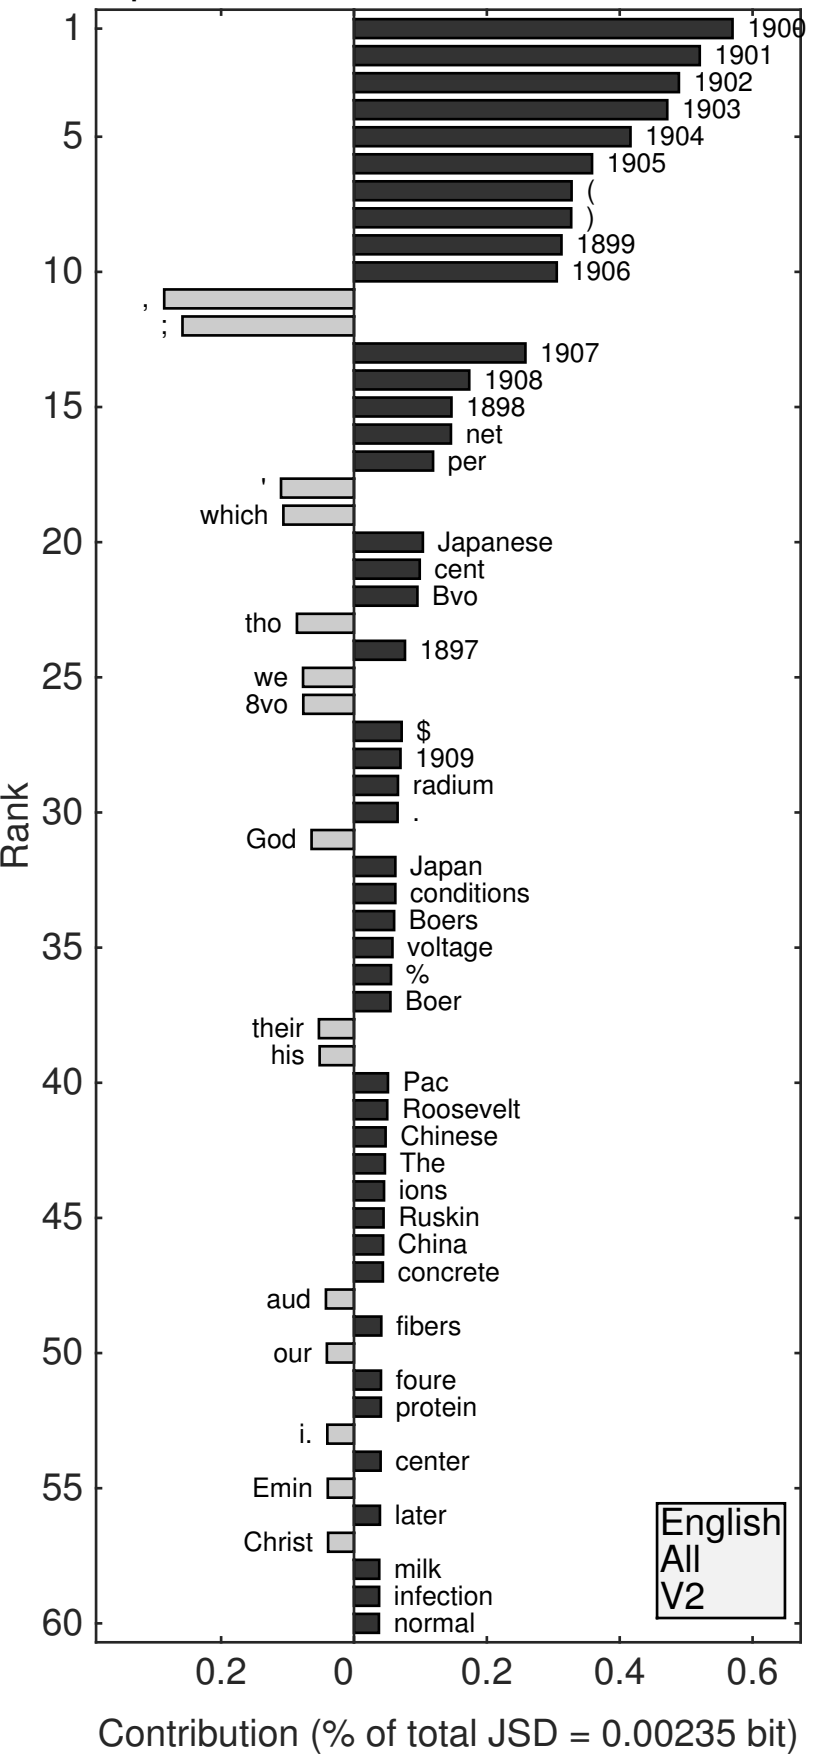



# Top JSD contributions: 1890s to 1910s

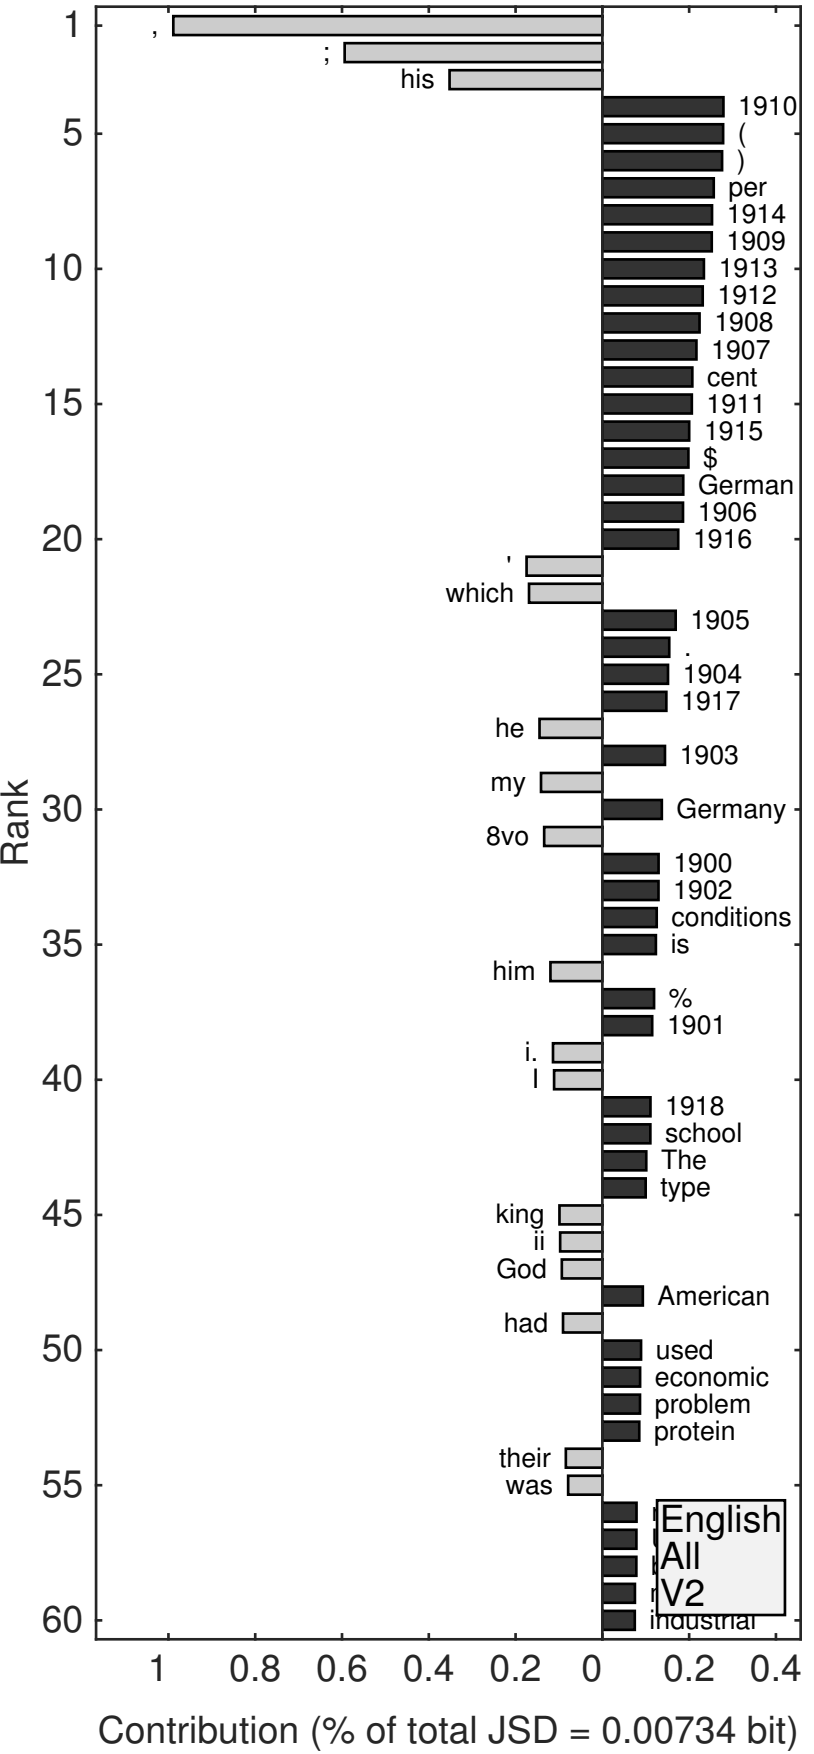

# Top JSD contributions: 1890s to 1920s

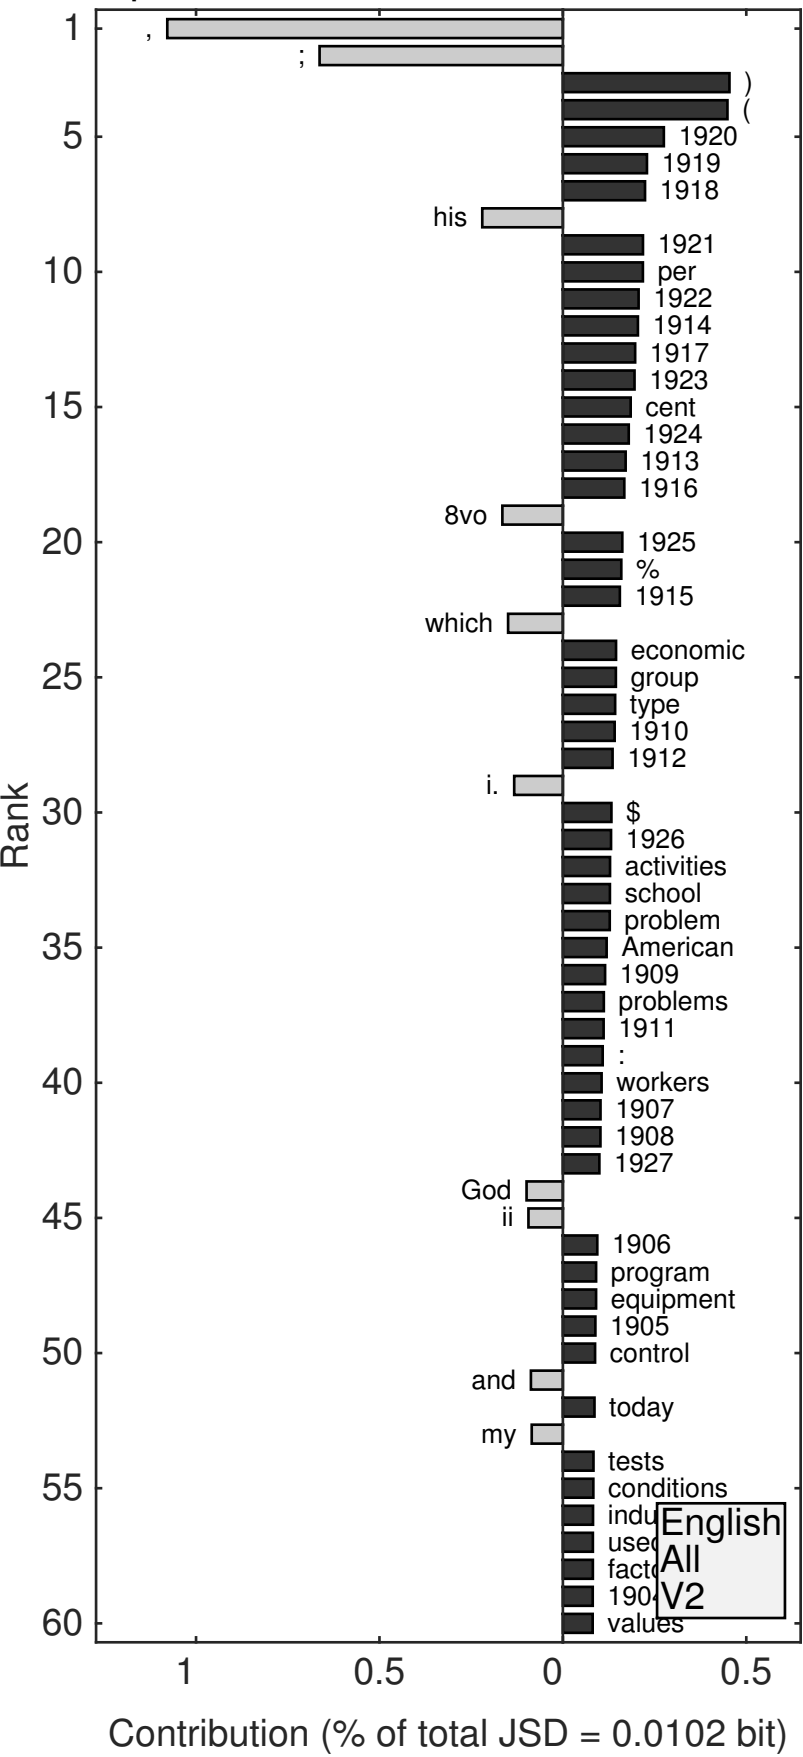

# Top JSD contributions: 1890s to 1930s

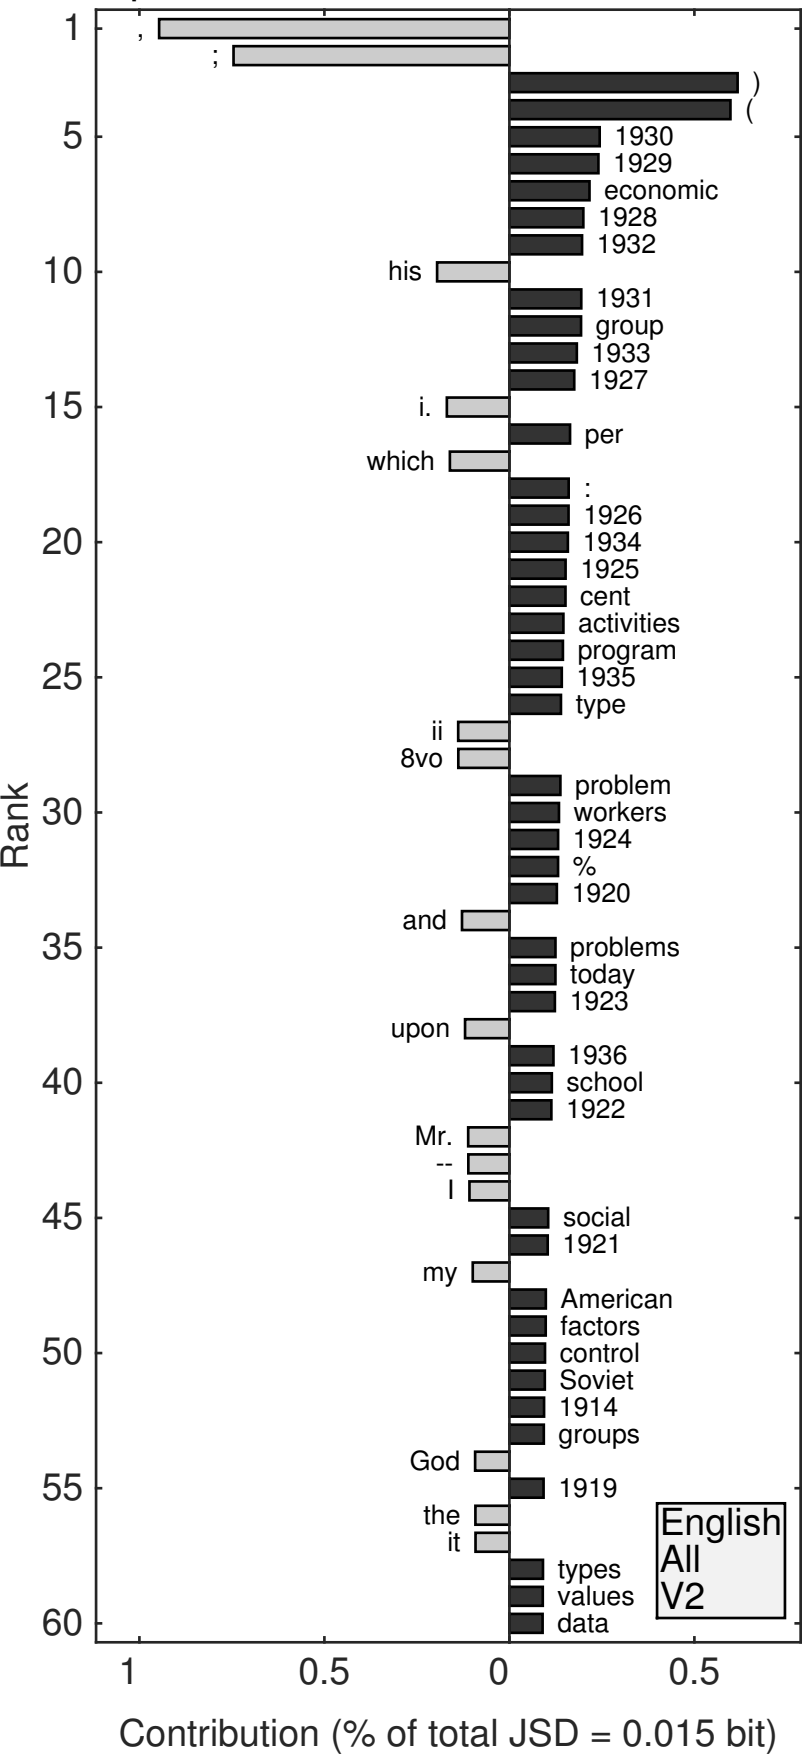

# Top JSD contributions: 1890s to 1940s

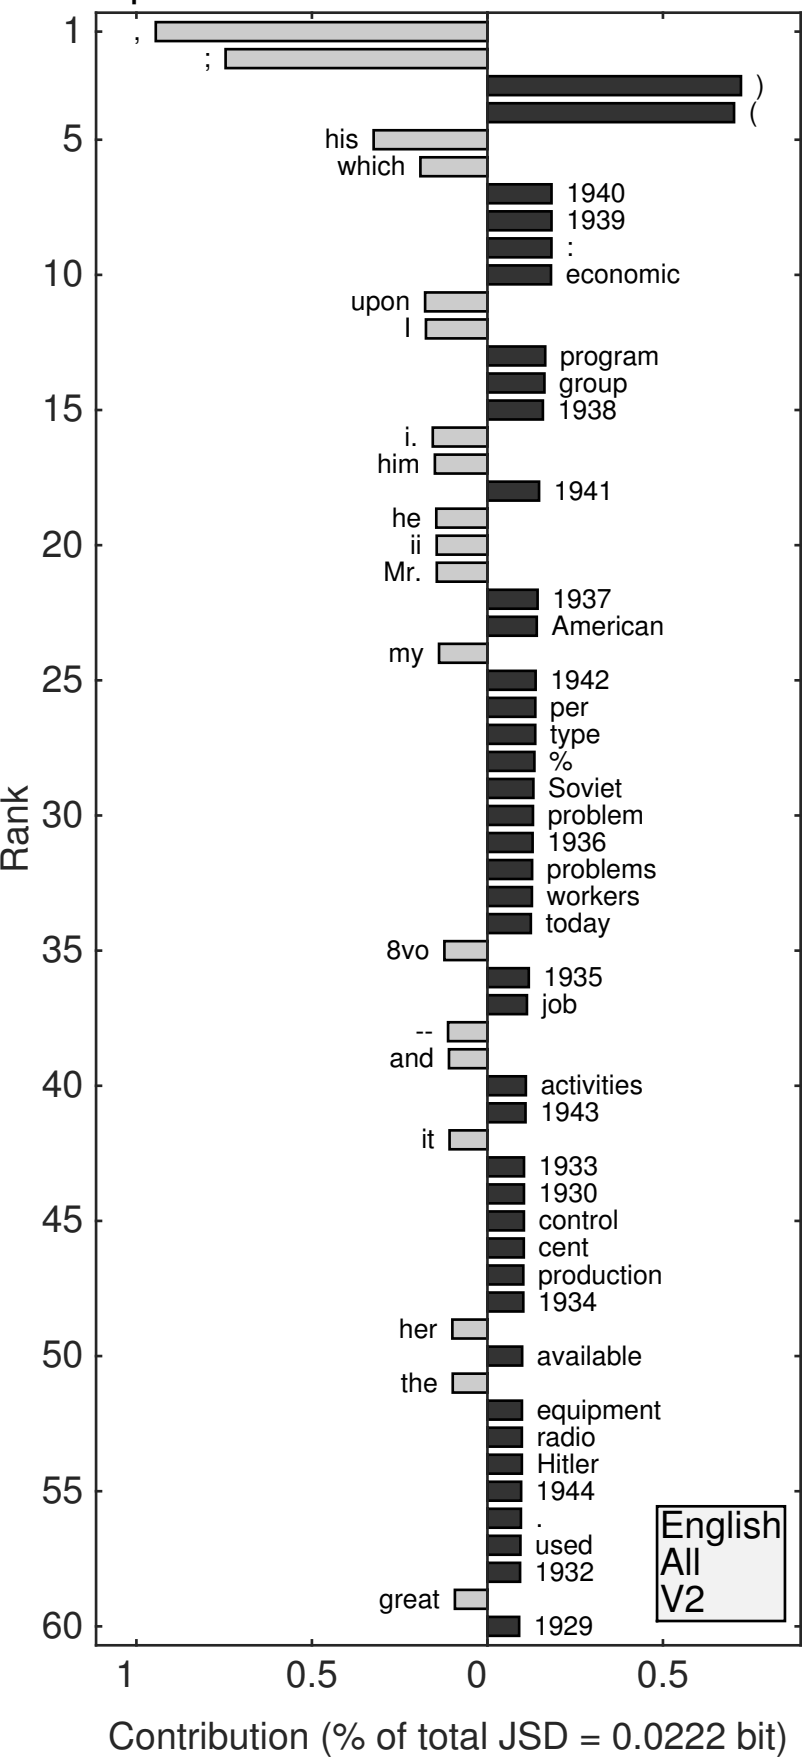

# Top JSD contributions: 1890s to 1950s

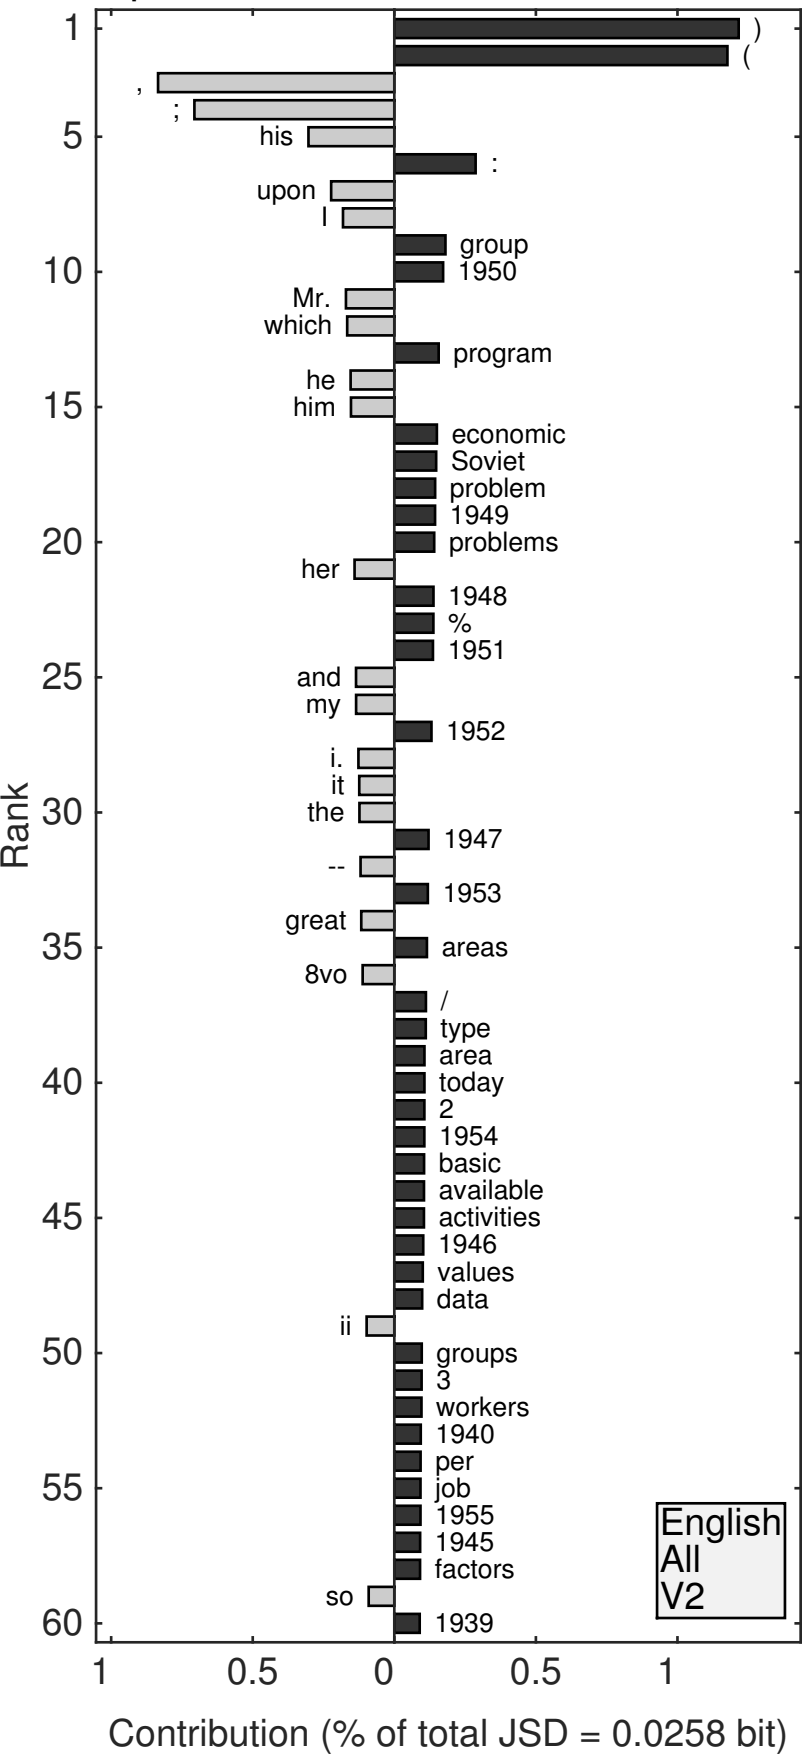

# Top JSD contributions: 1890s to 1960s

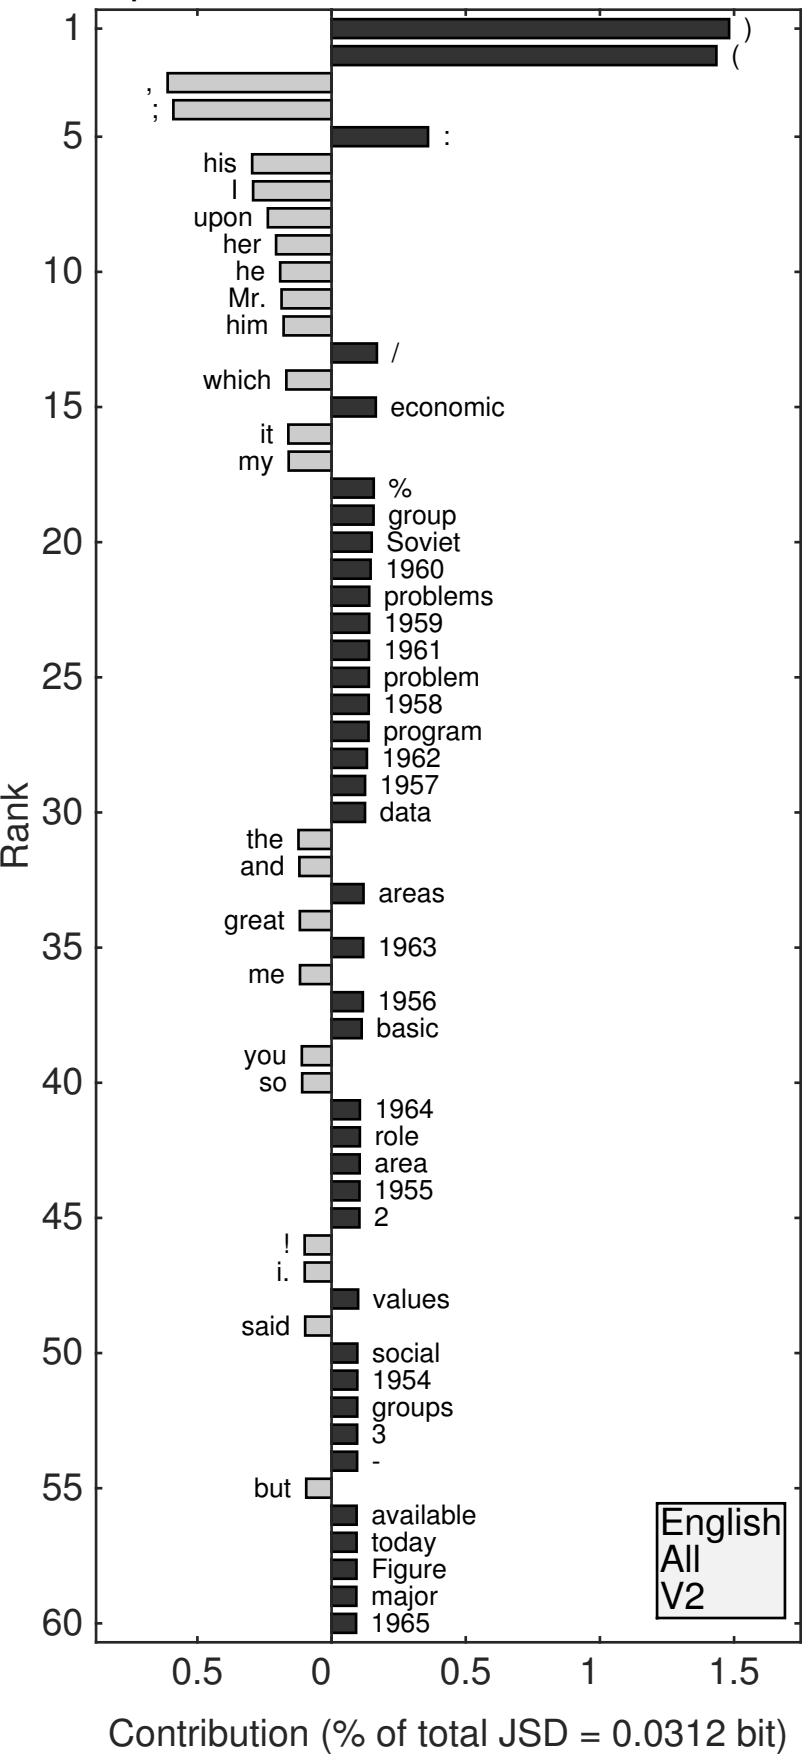

# Top JSD contributions: 1890s to 1970s

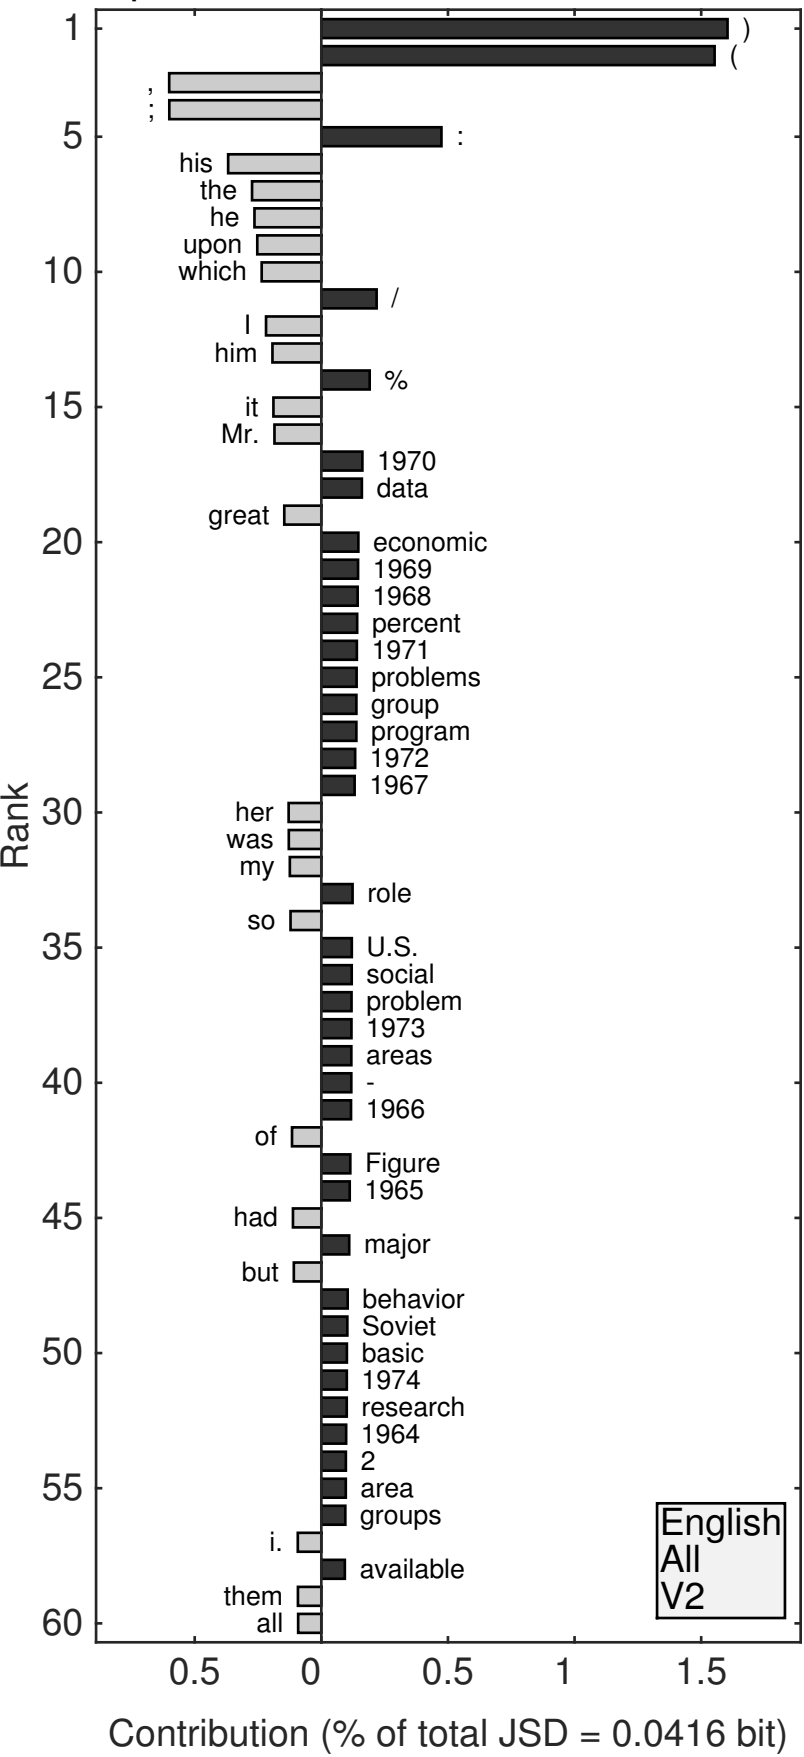

# Top JSD contributions: 1890s to 1980s

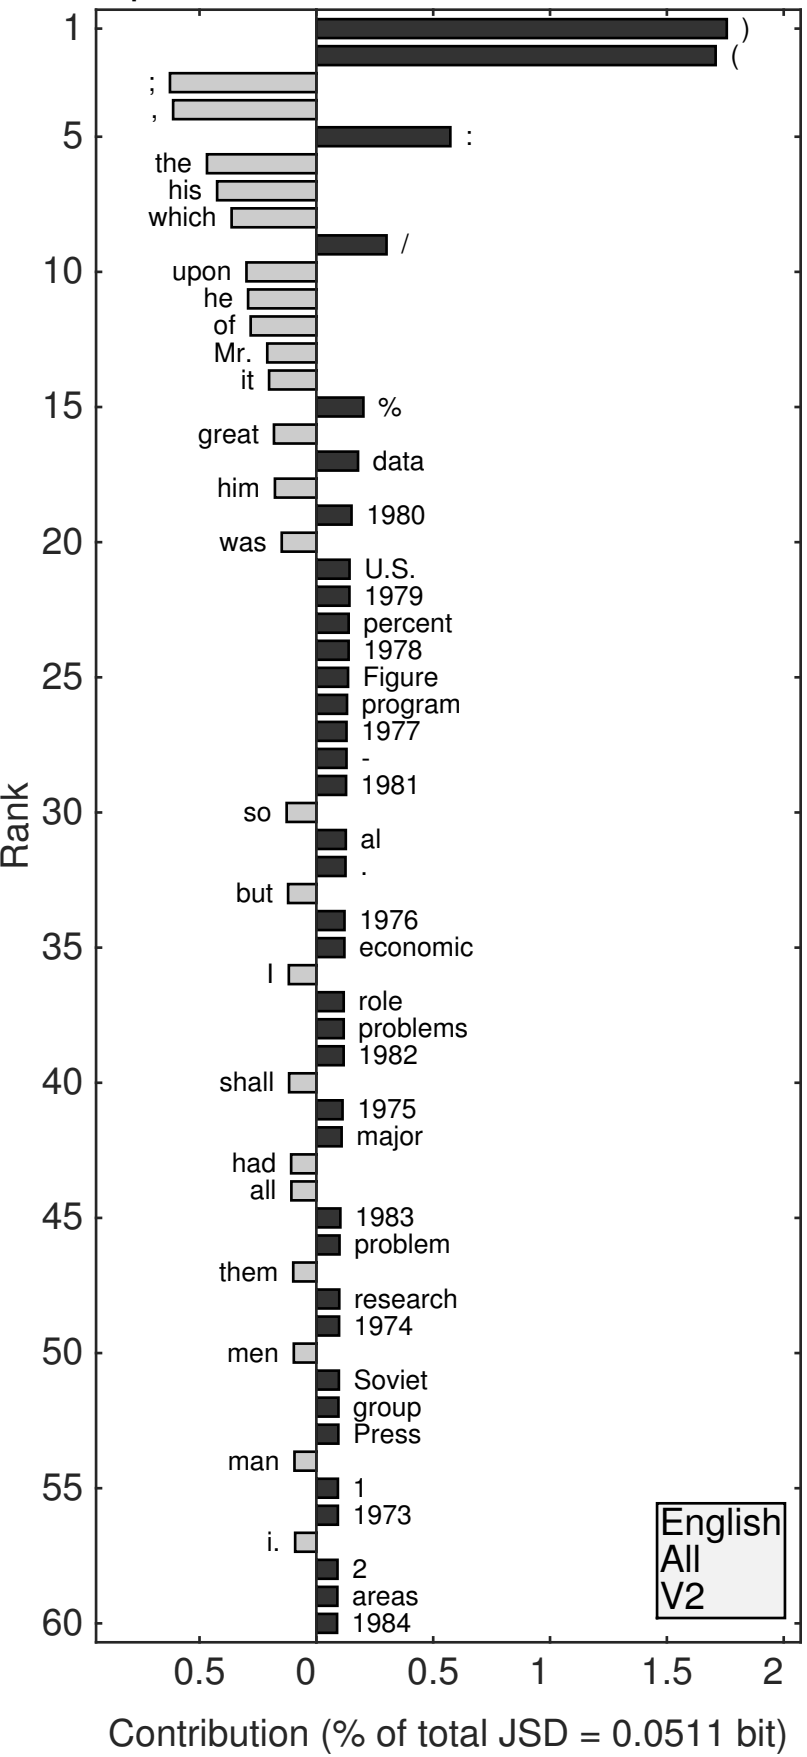



# Top JSD contributions: 1890s to 1990s

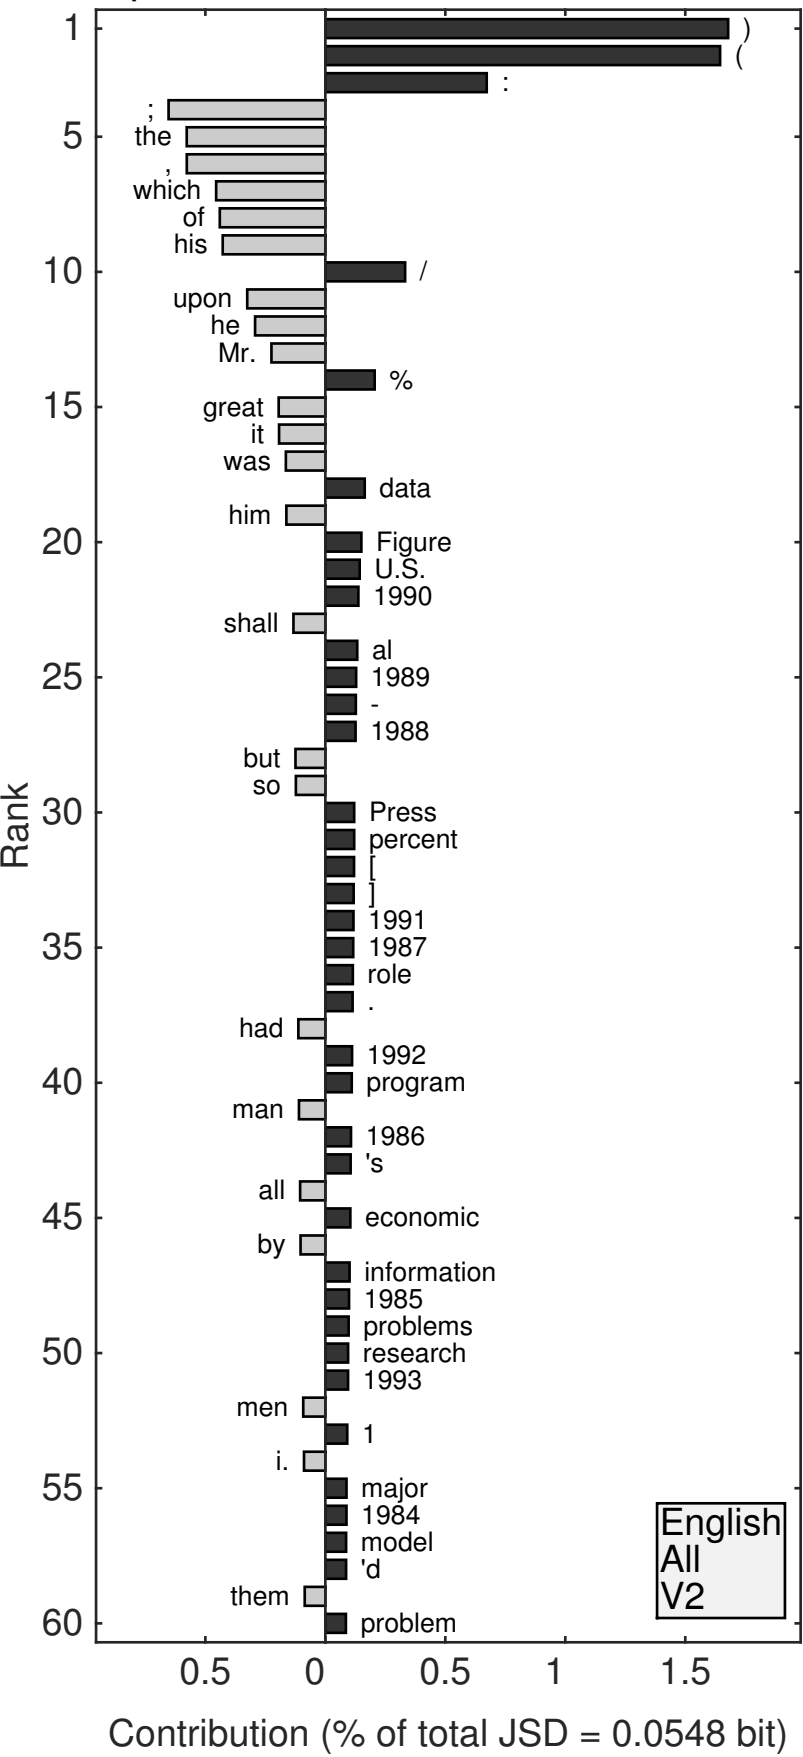

English  
All  
V2

# Top JSD contributions: 1900s to 1910s

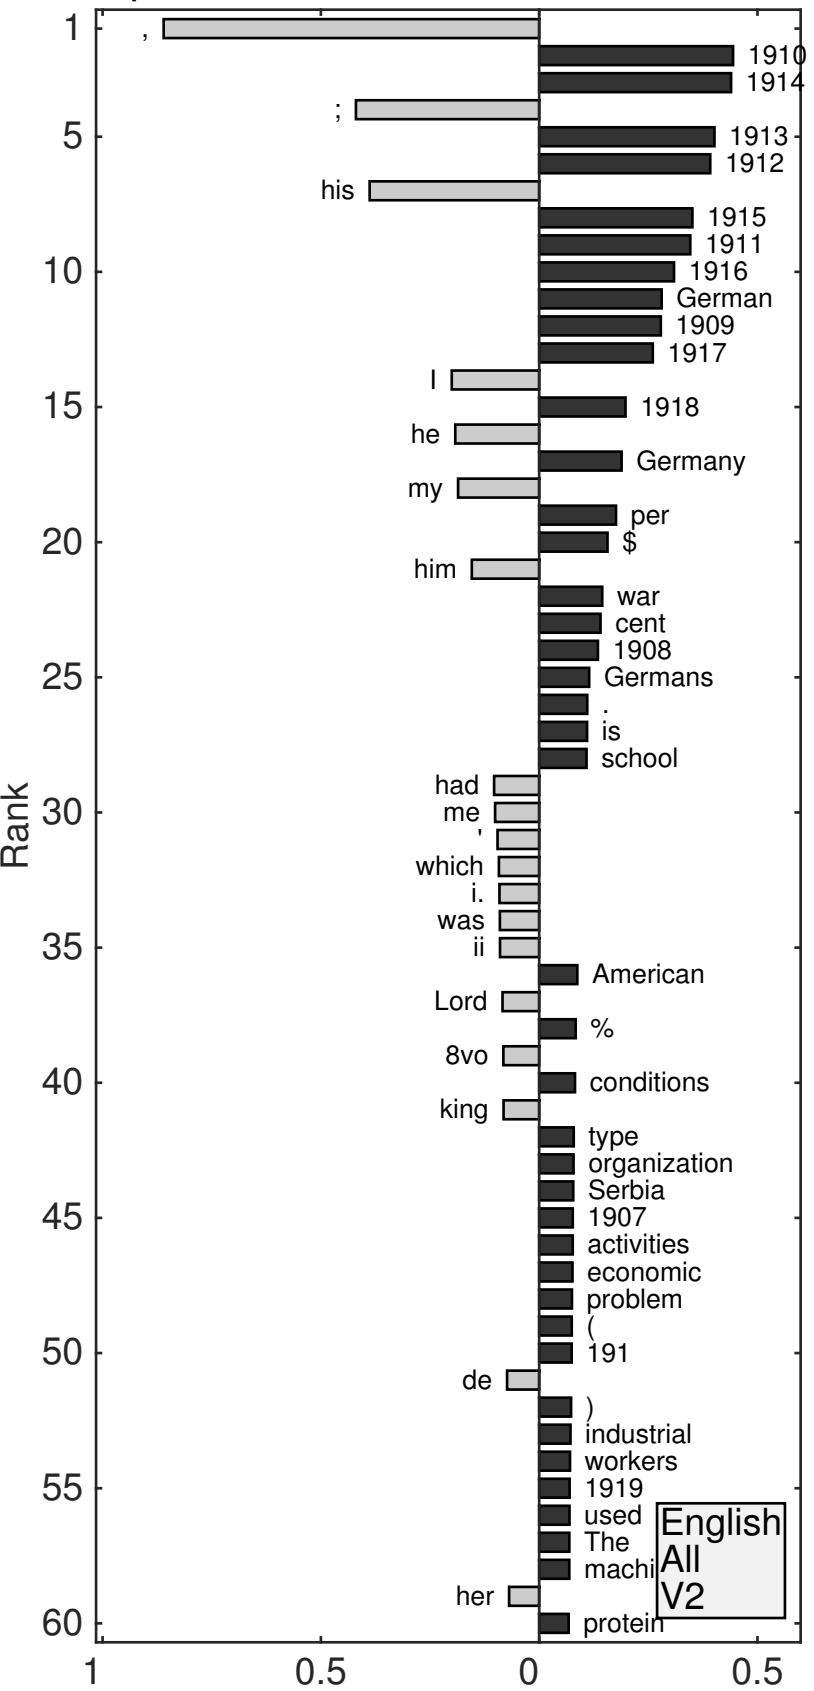

Contribution (% of total JSD = 0.00408 bit)

# Top JSD contributions: 1900s to 1920s

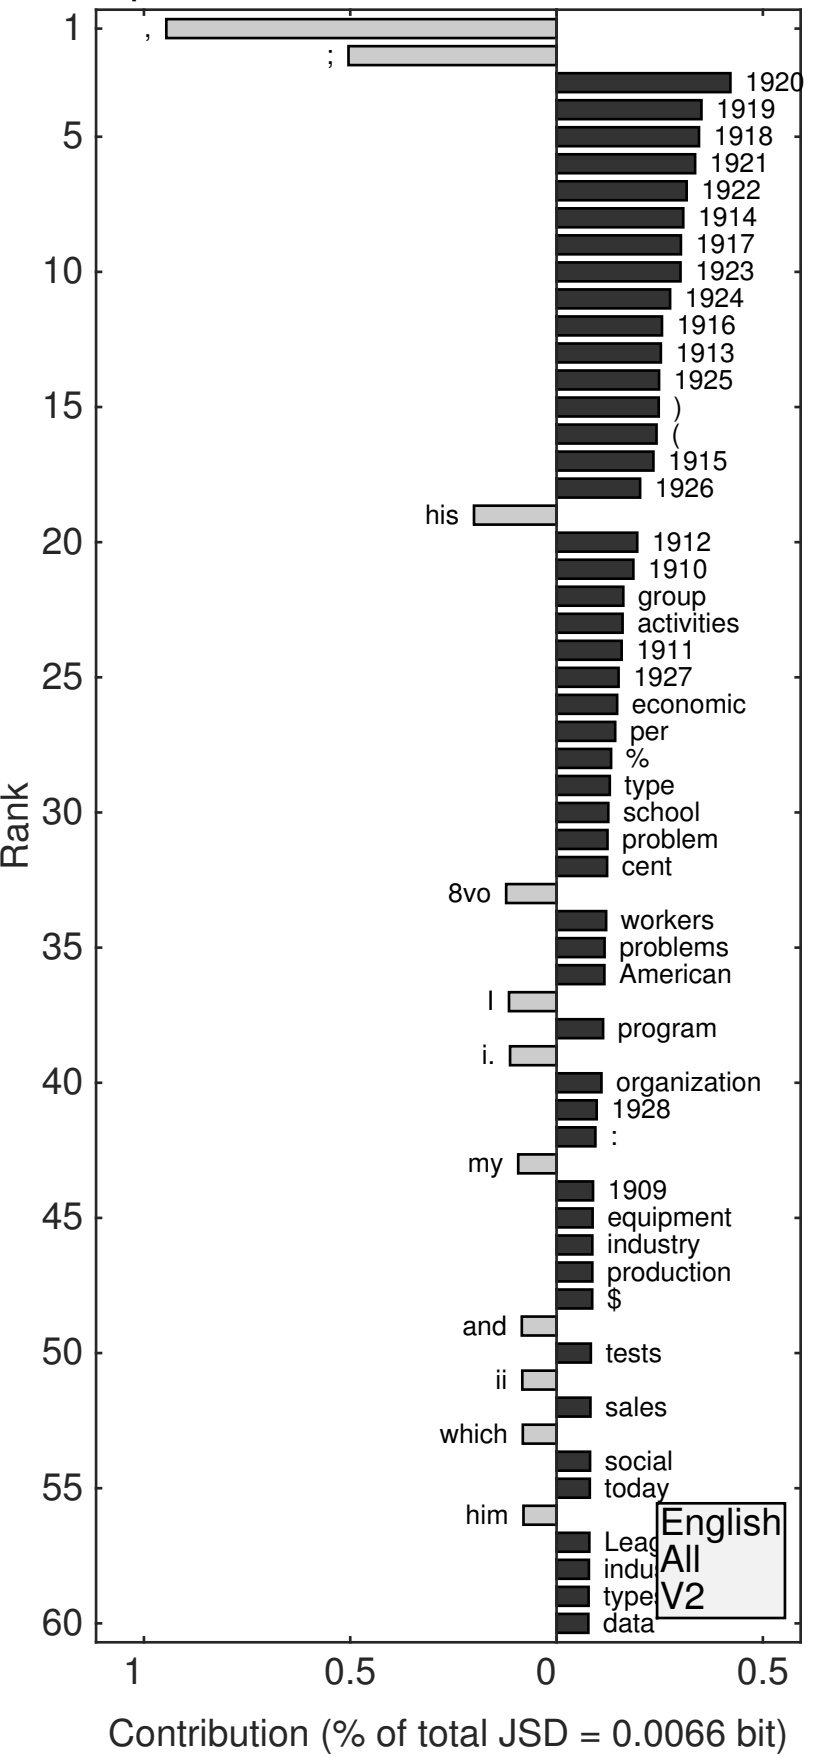

# Top JSD contributions: 1900s to 1930s

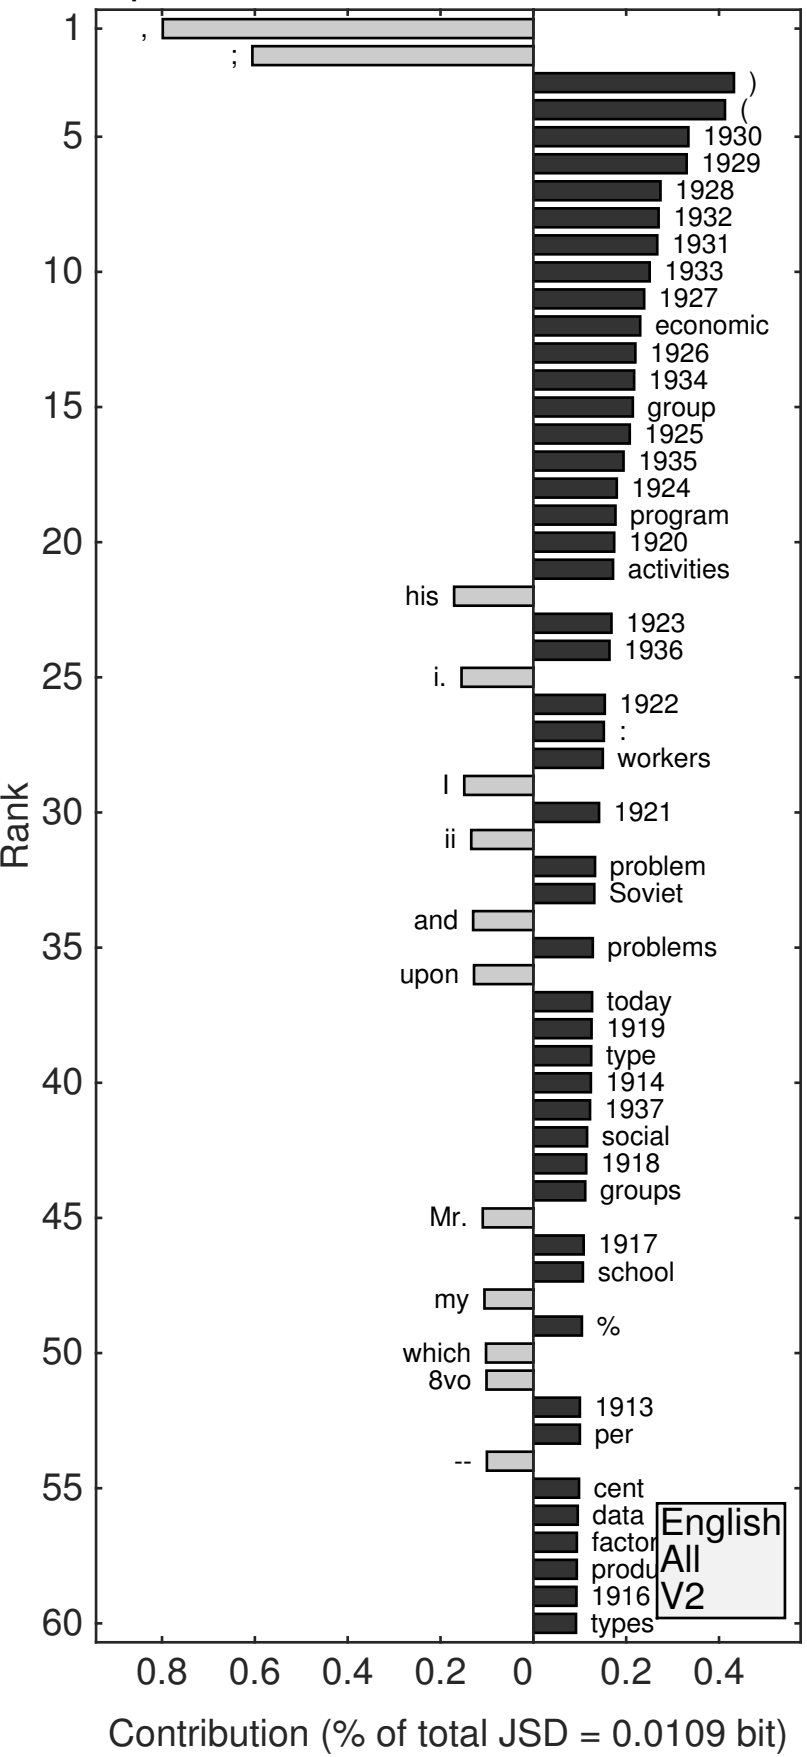

# Top JSD contributions: 1900s to 1940s

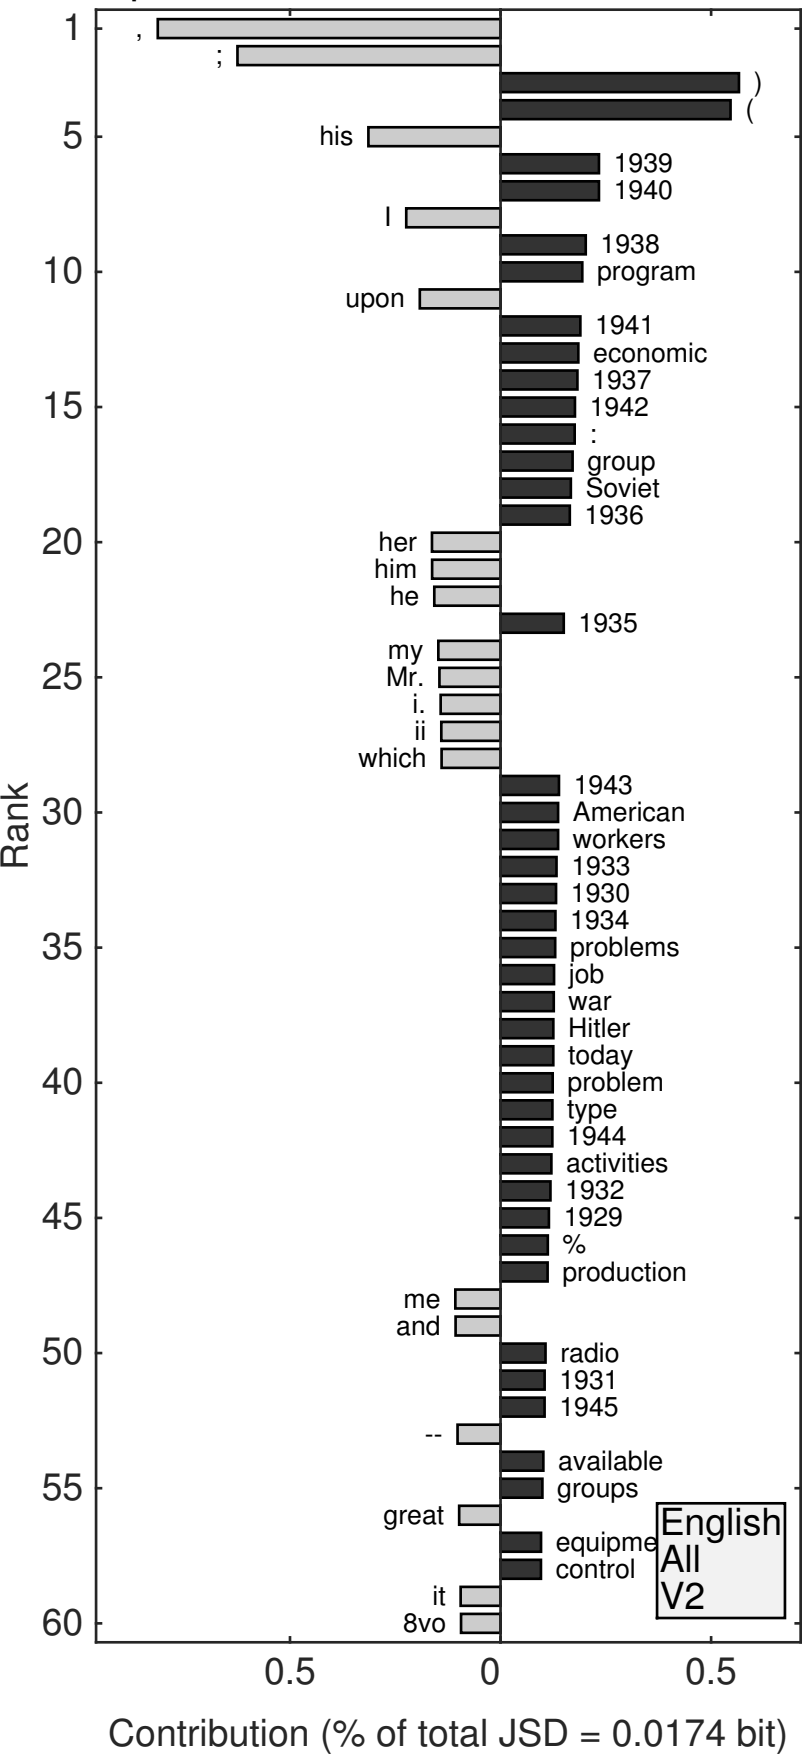

# Top JSD contributions: 1900s to 1950s

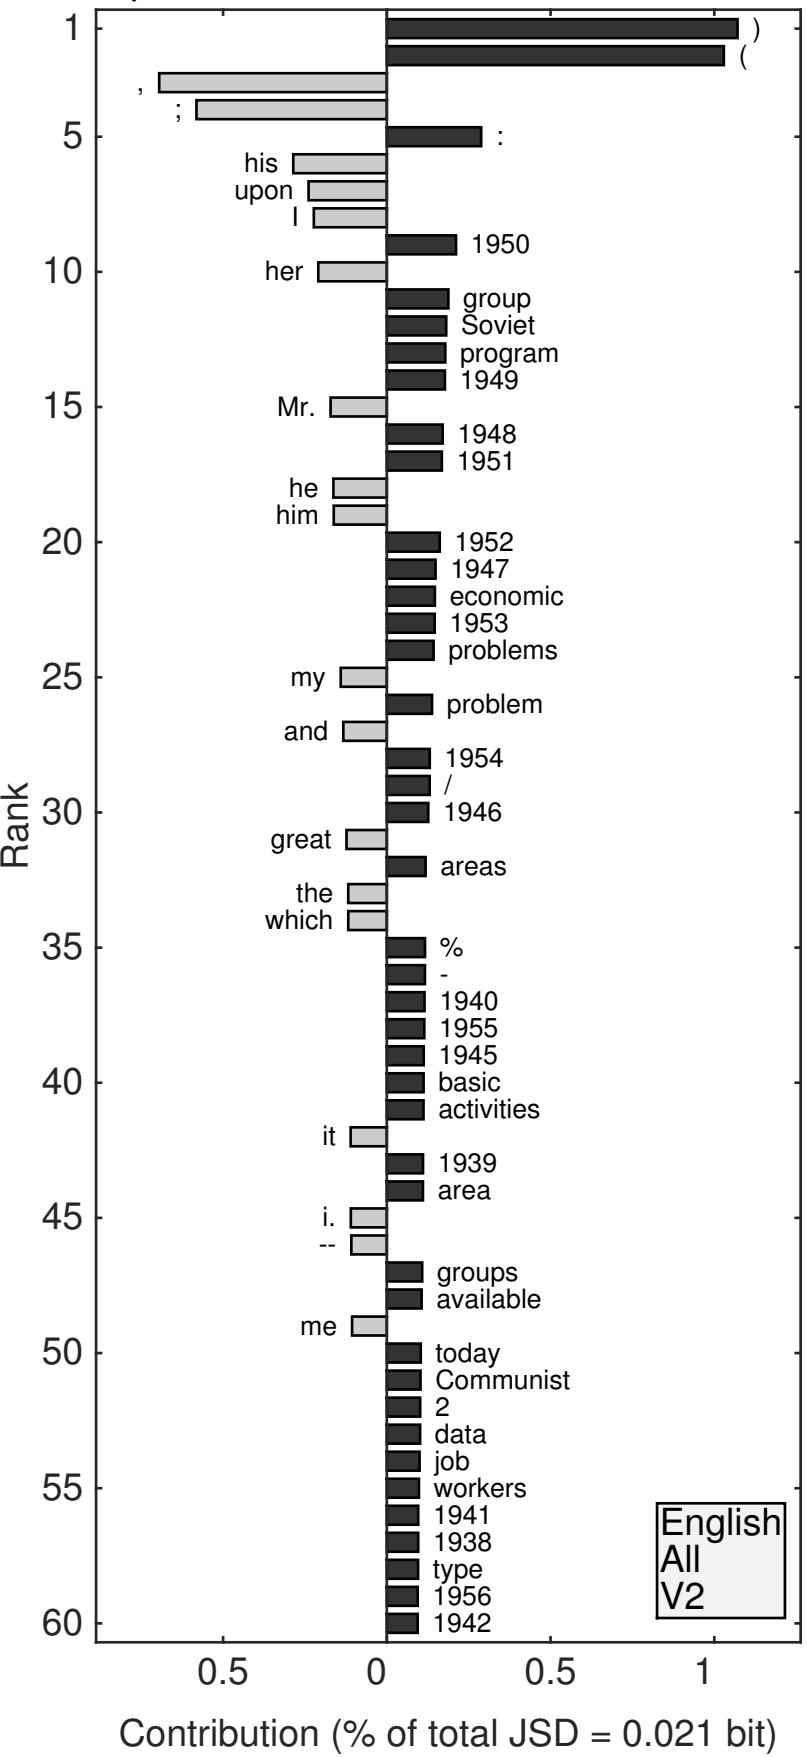

# Top JSD contributions: 1900s to 1960s

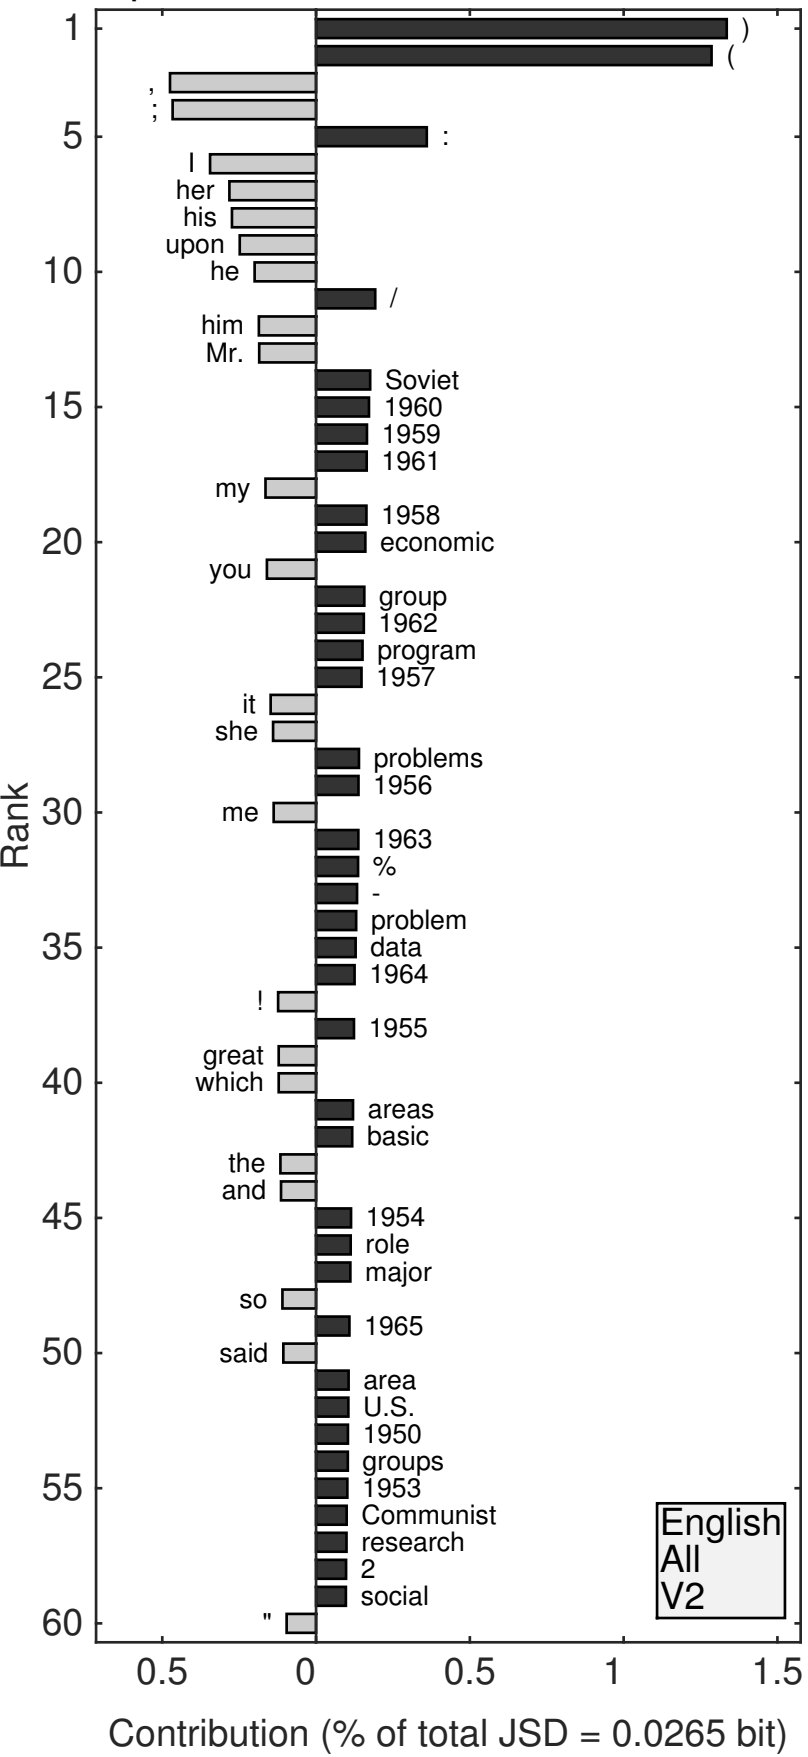

# Top JSD contributions: 1900s to 1970s

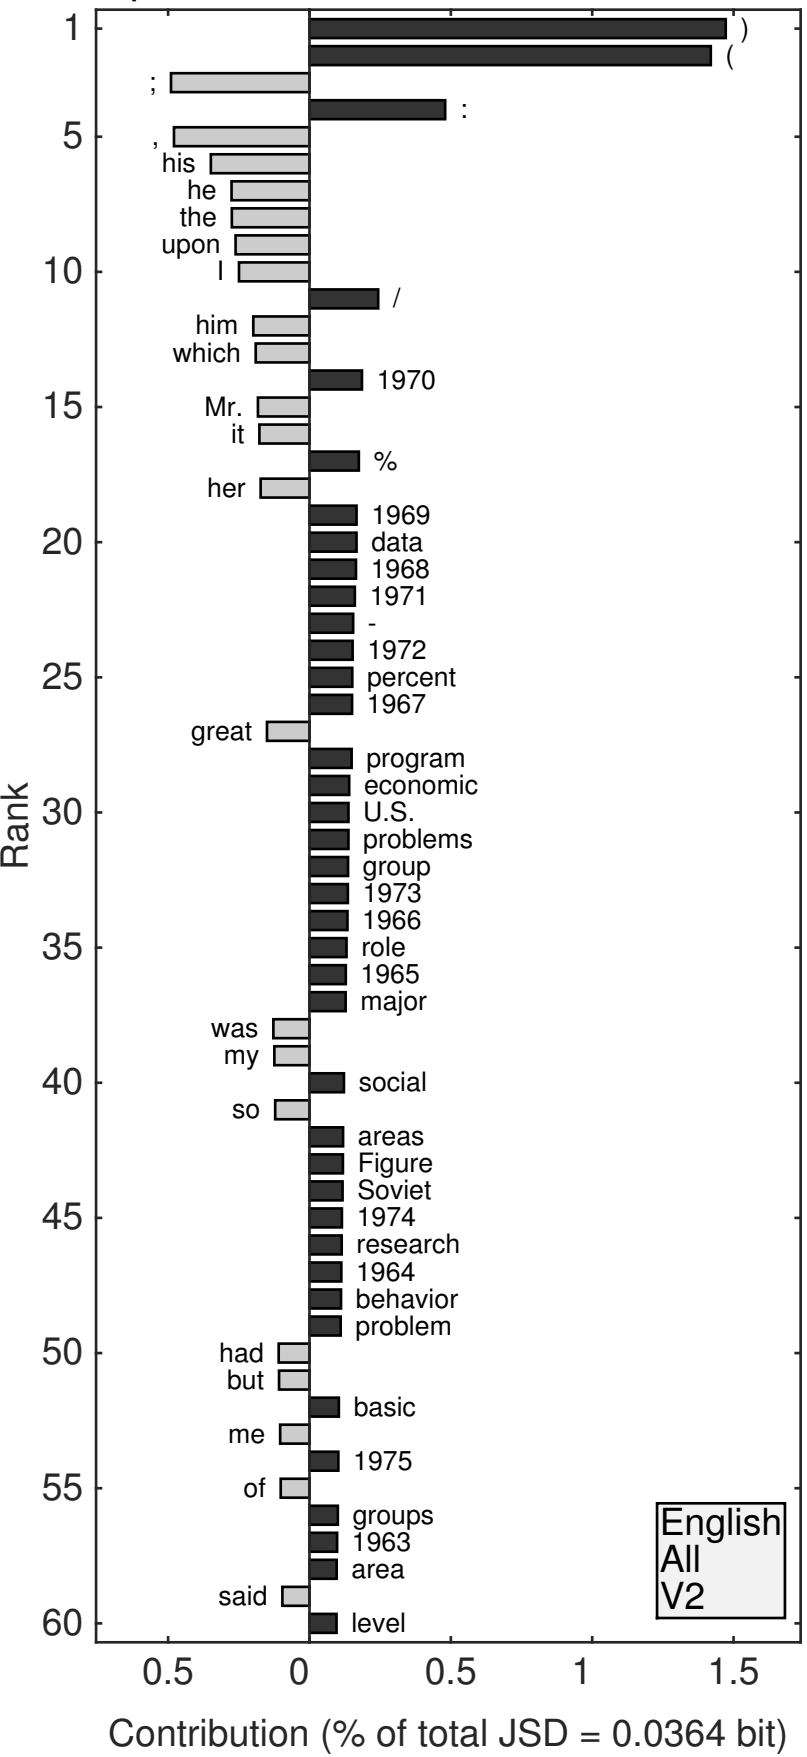



# Top JSD contributions: 1900s to 1980s

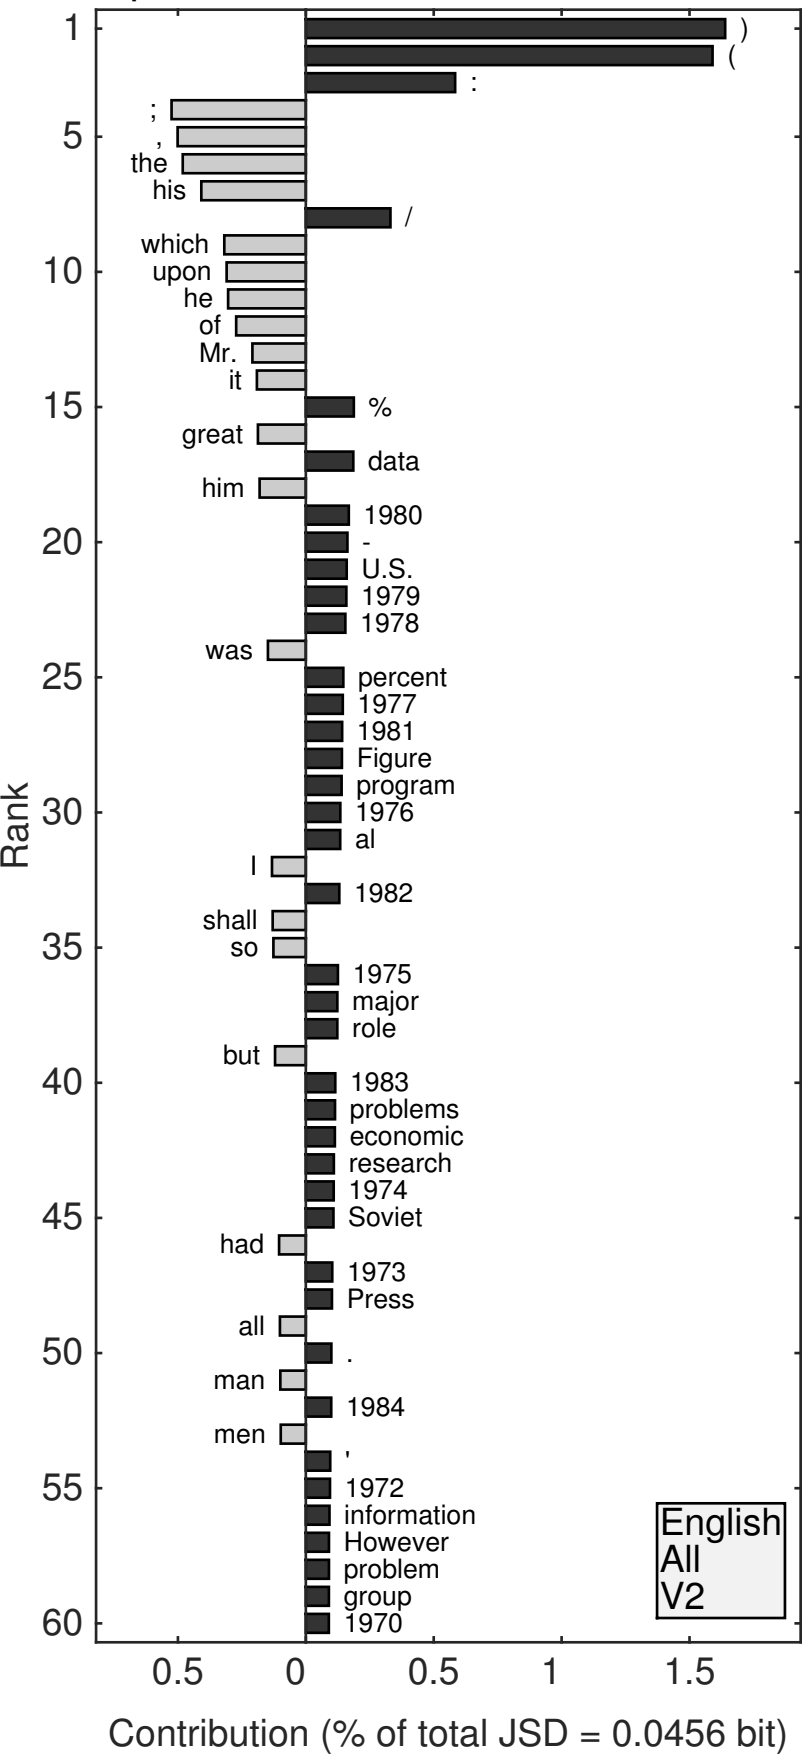

# Top JSD contributions: 1900s to 1990s

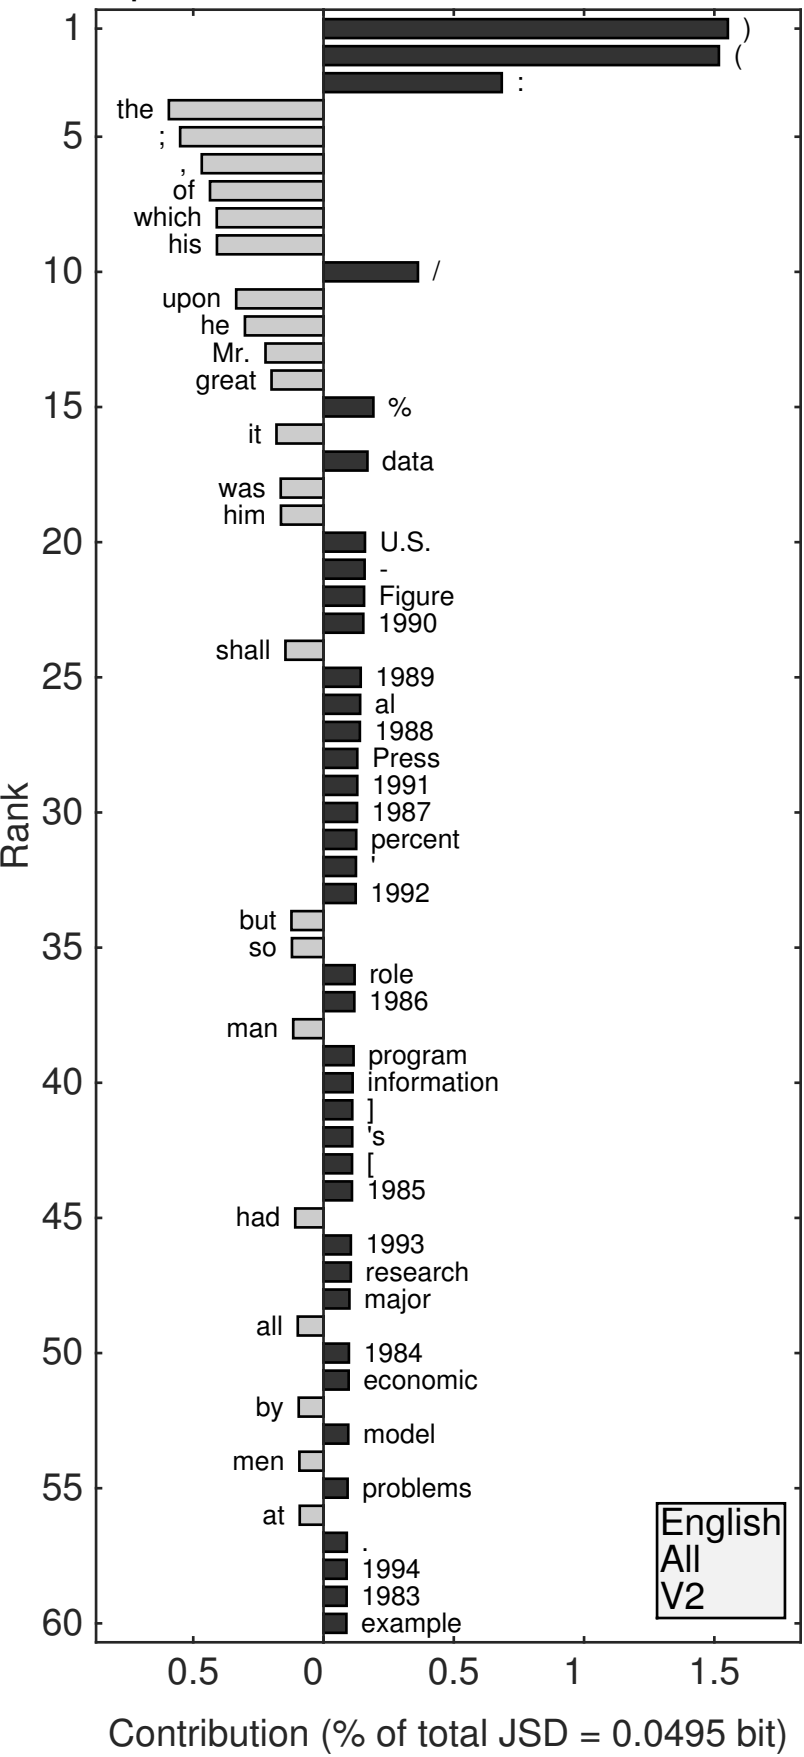

# Top JSD contributions: 1910s to 1920s

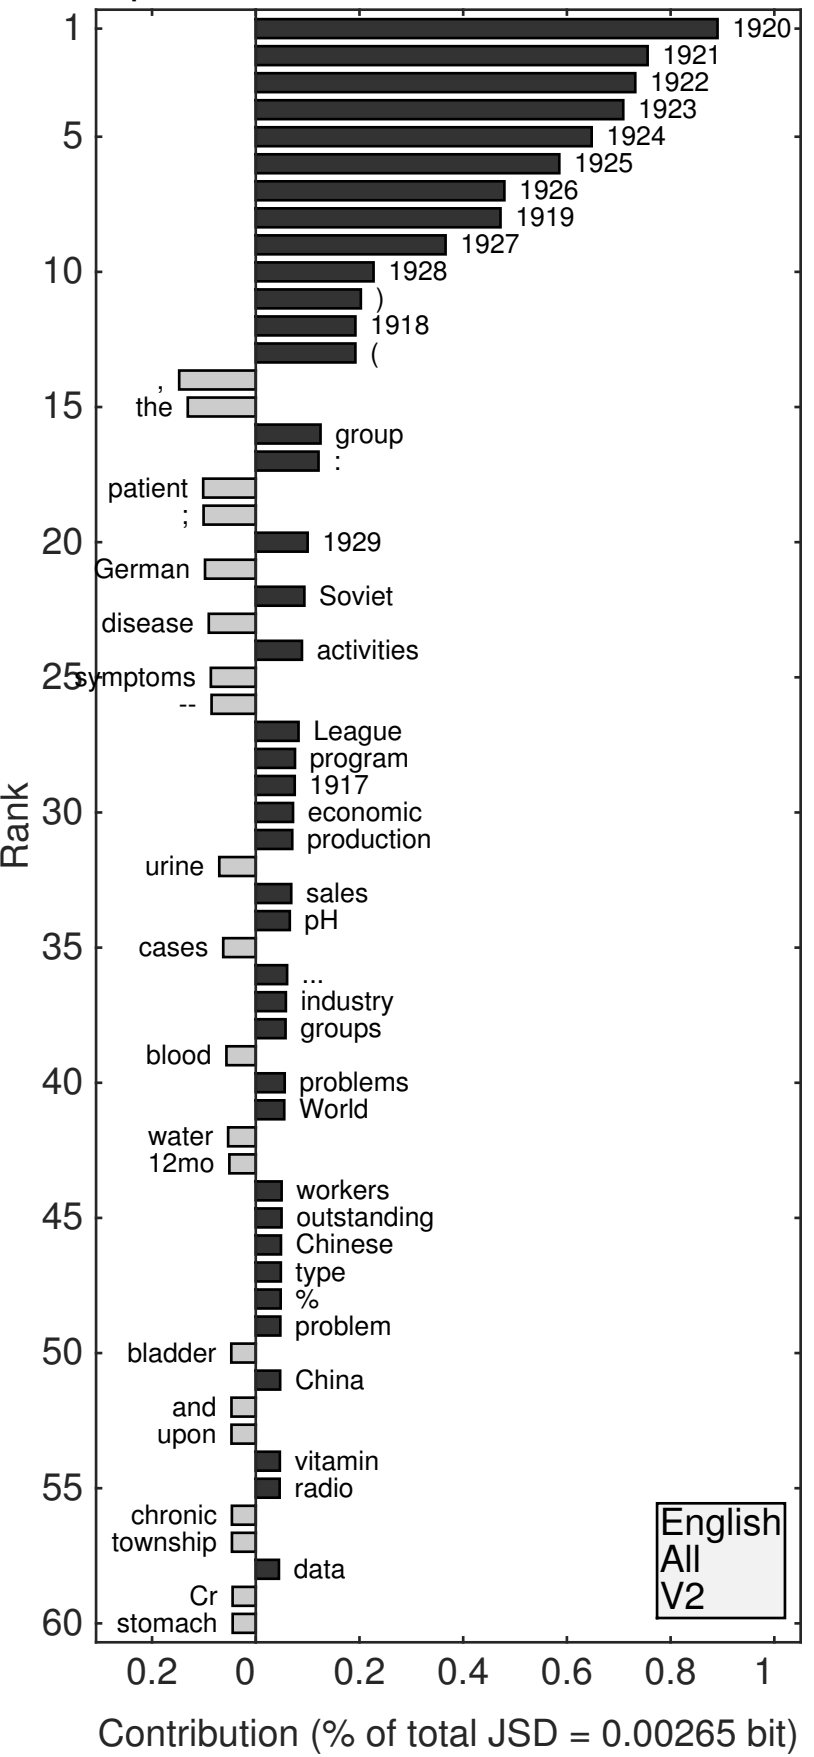

# Top JSD contributions: 1910s to 1930s

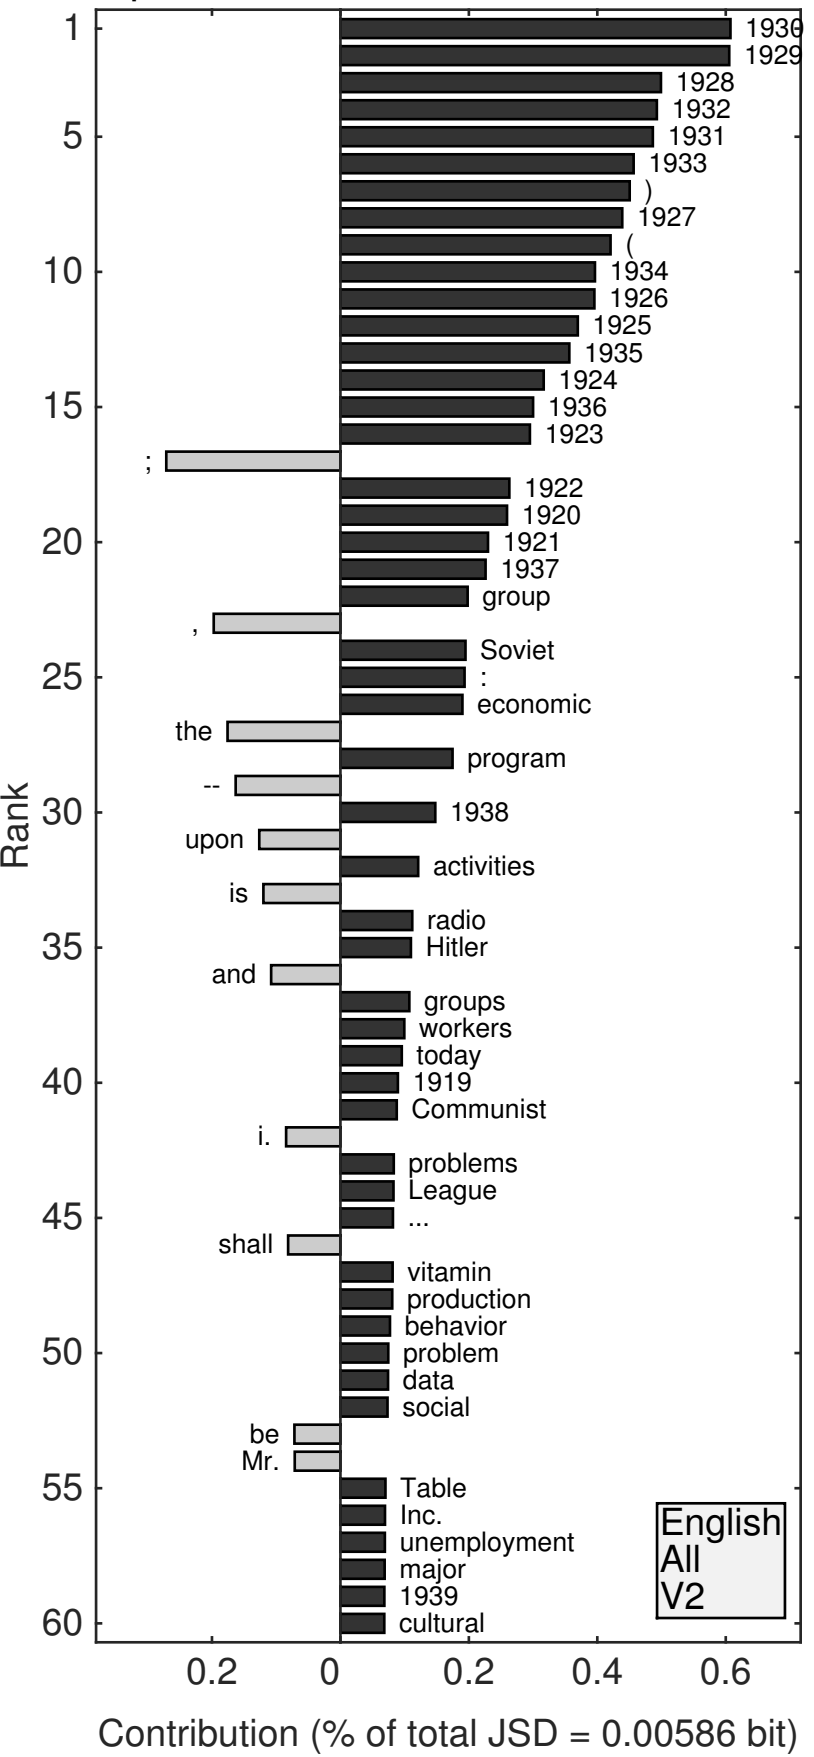

# Top JSD contributions: 1910s to 1940s

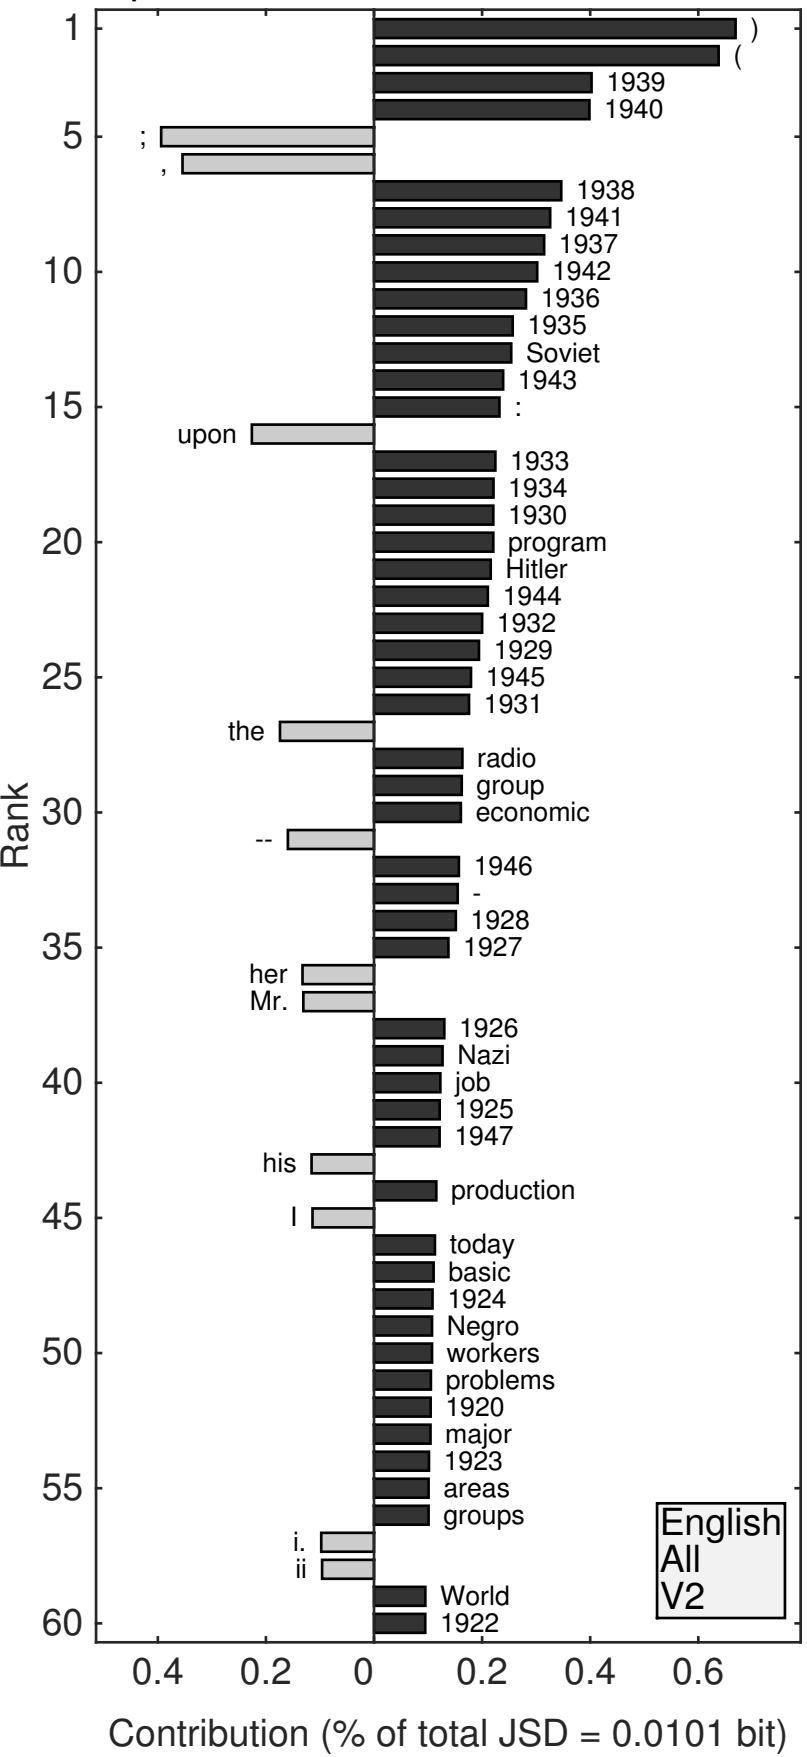

# Top JSD contributions: 1910s to 1950s

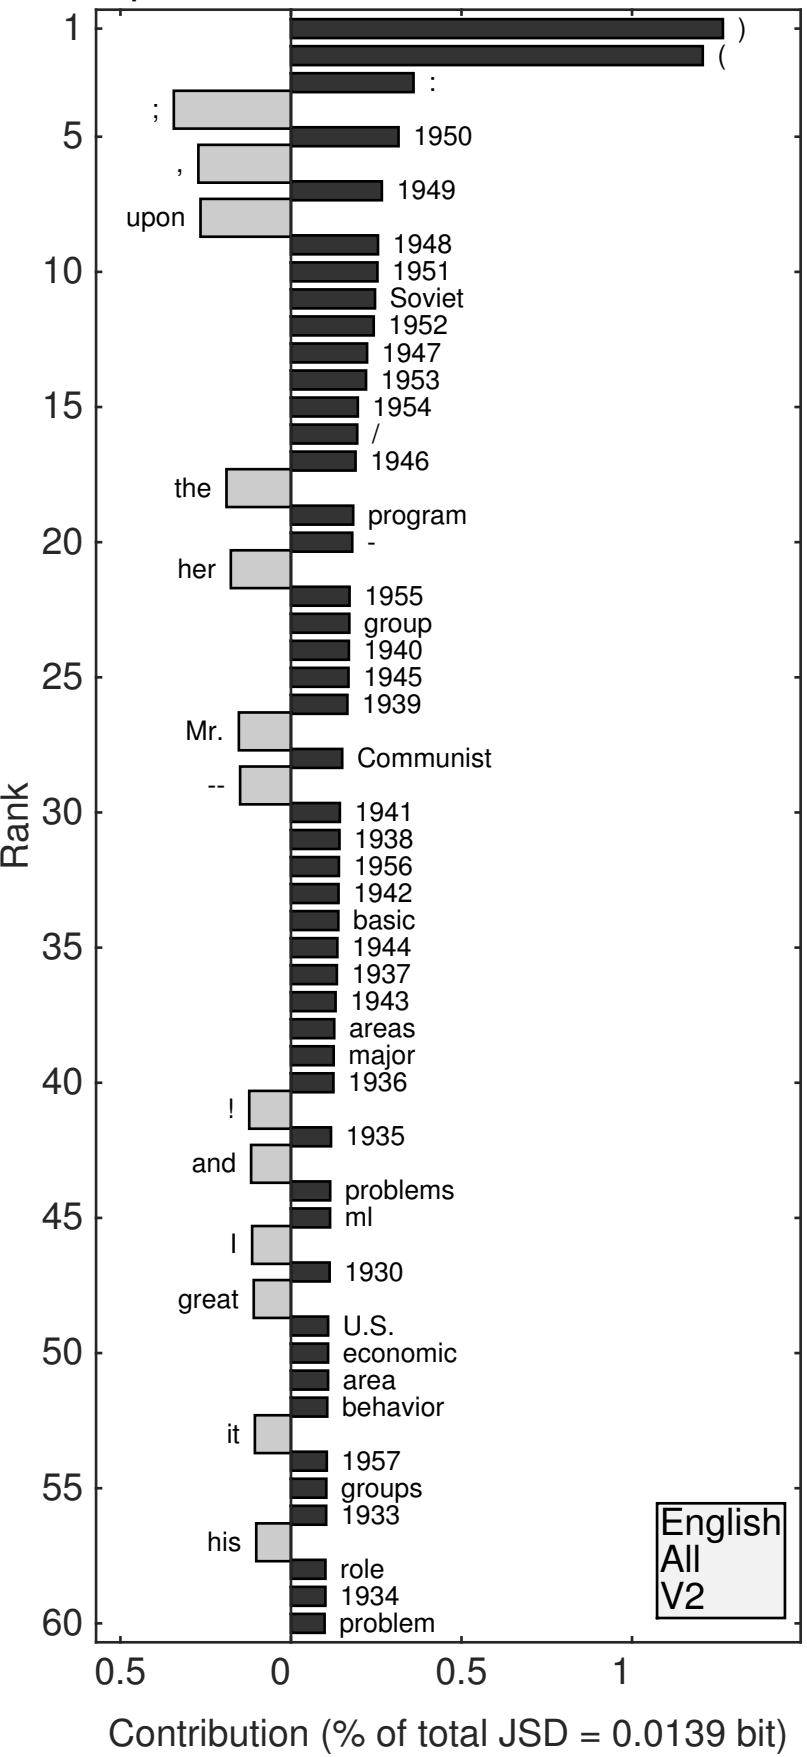

# Top JSD contributions: 1910s to 1960s

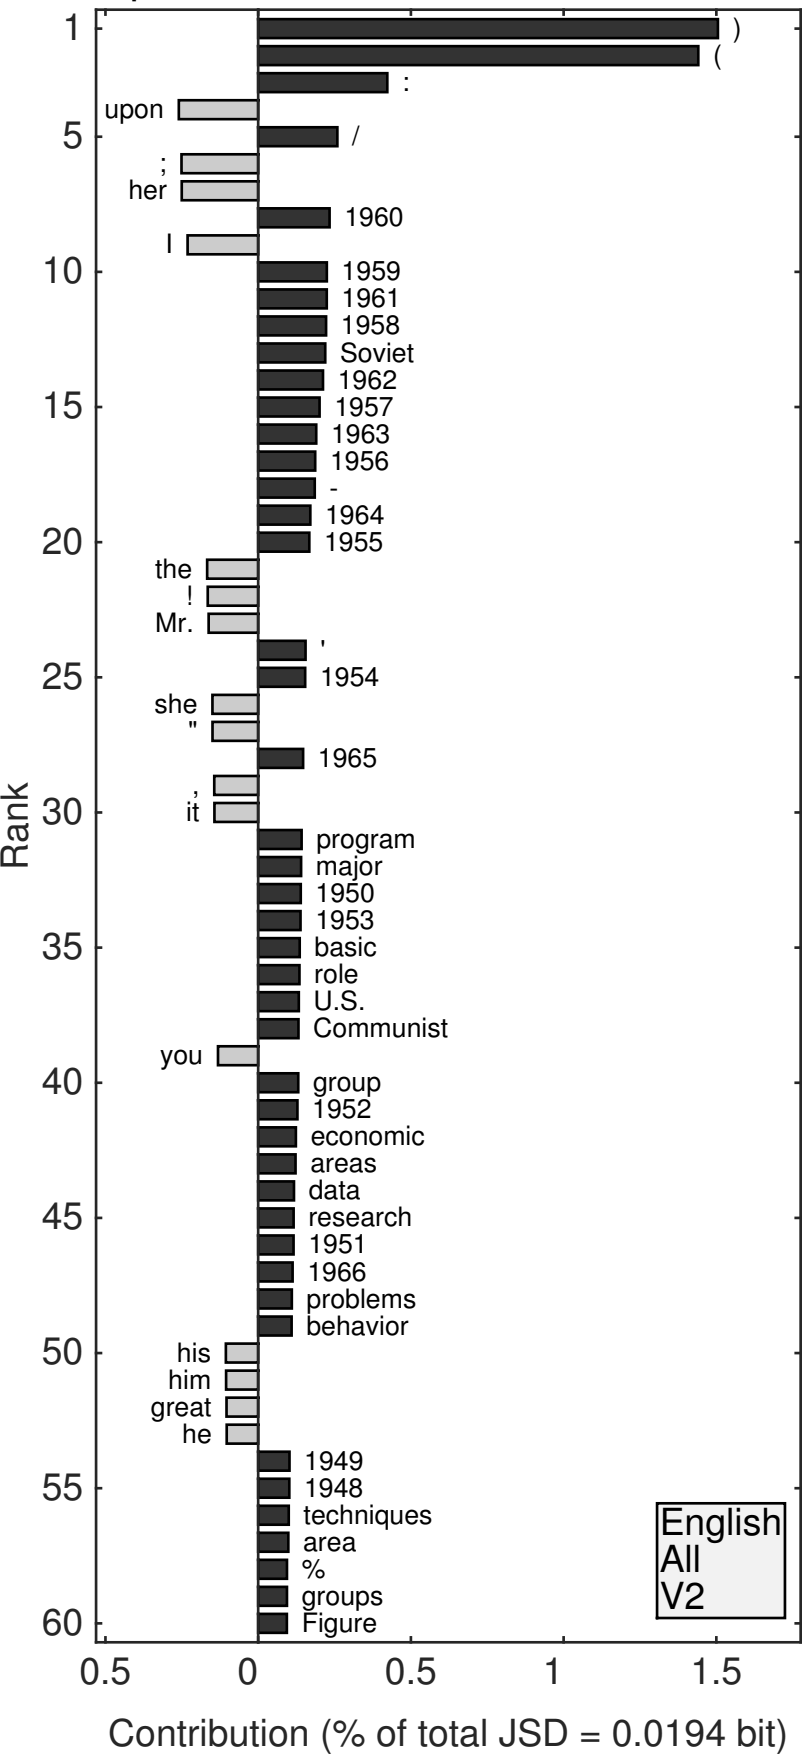

# Top JSD contributions: 1910s to 1970s

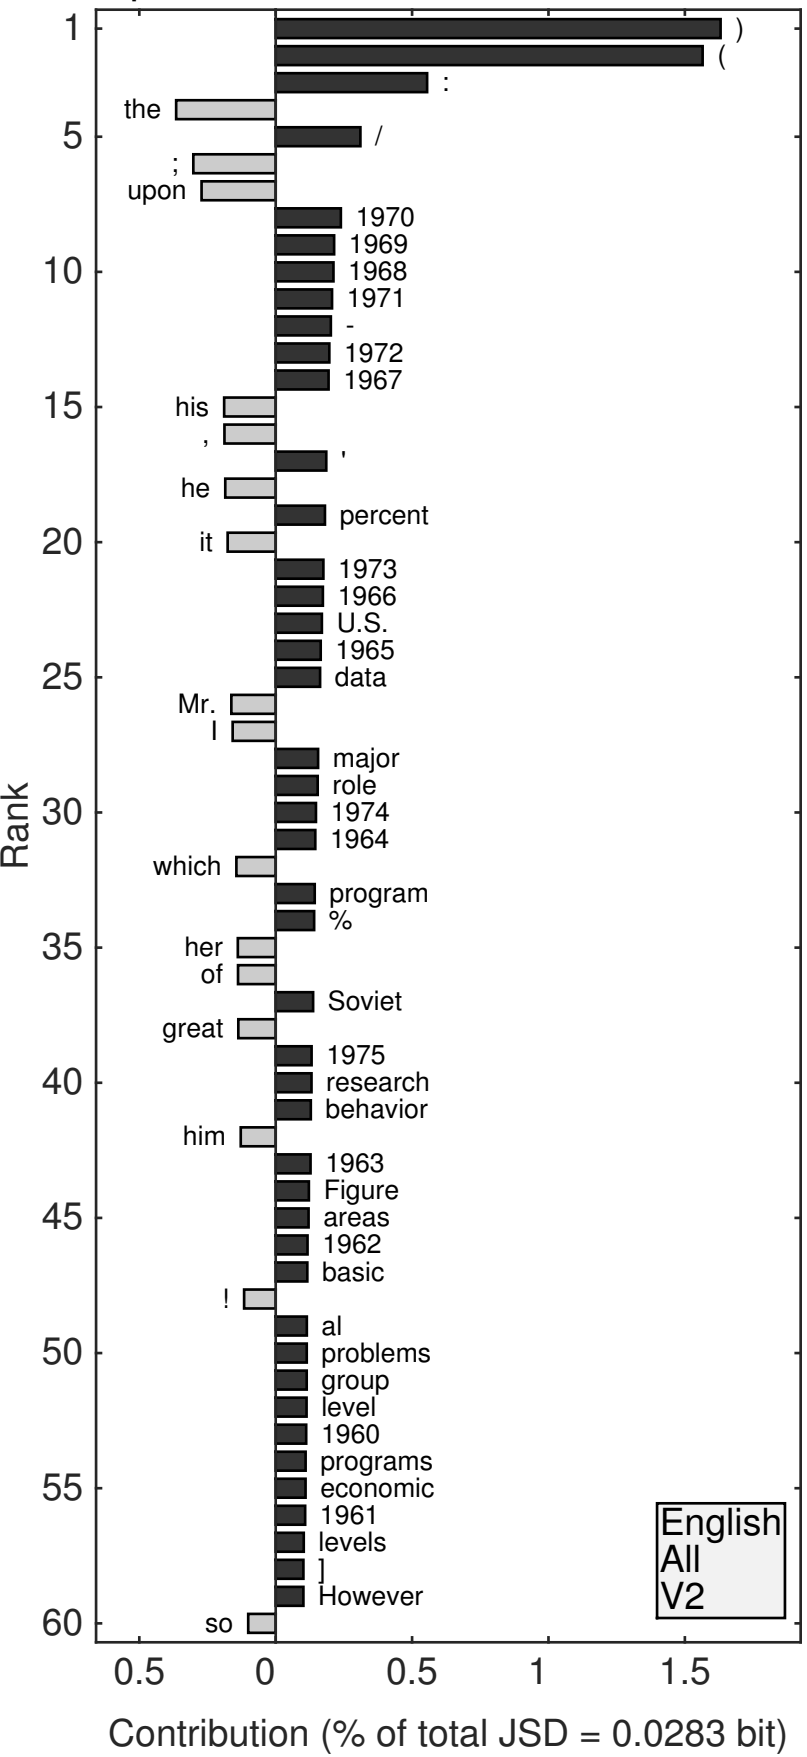



# Top JSD contributions: 1910s to 1980s

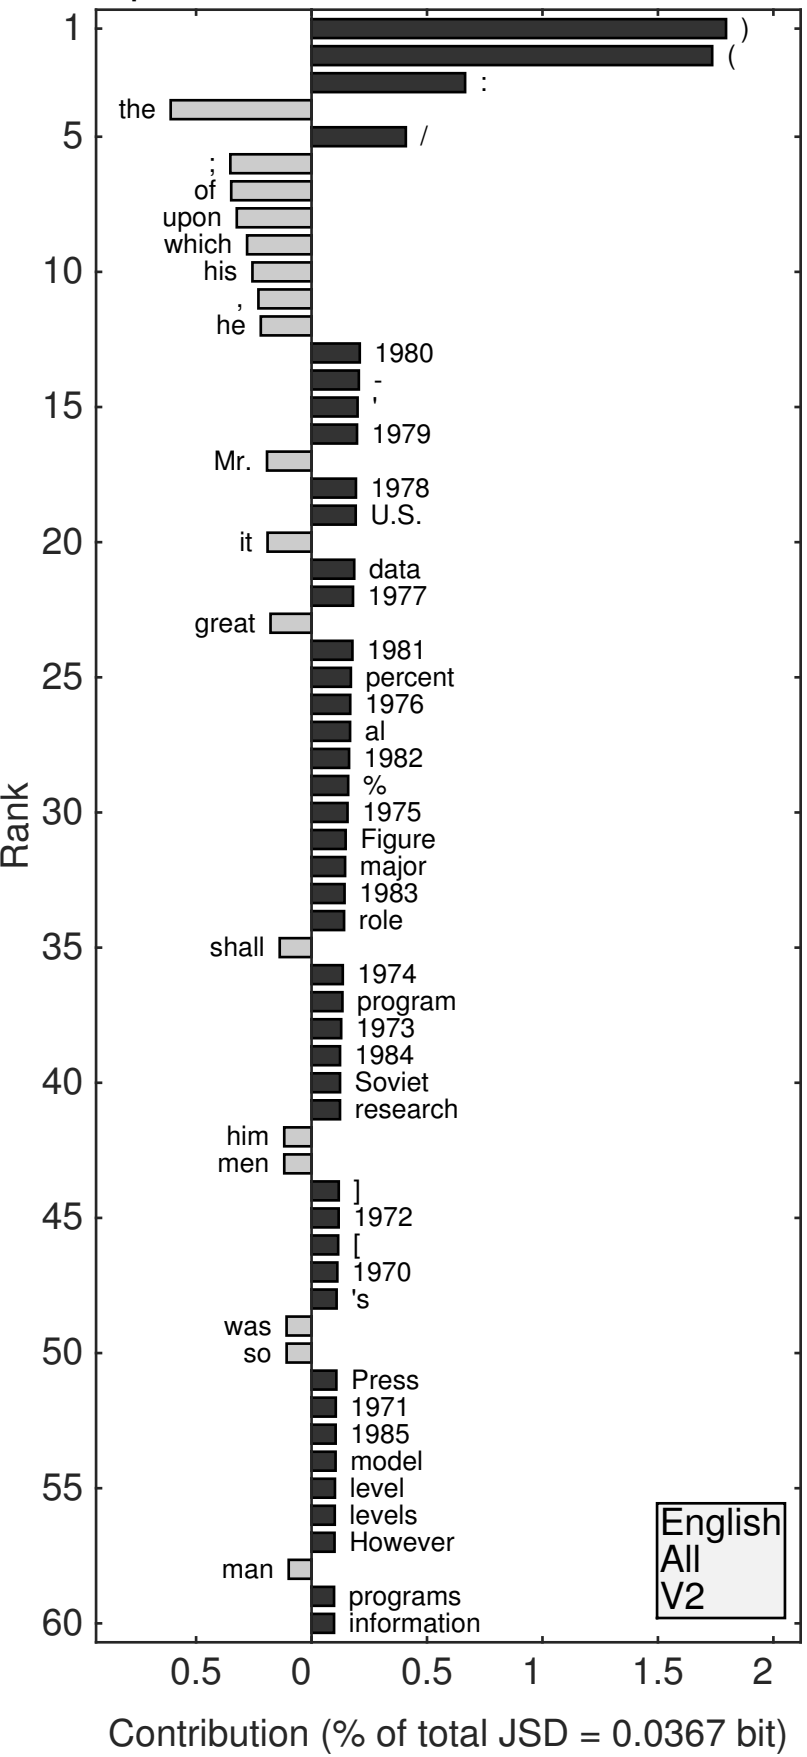

# Top JSD contributions: 1910s to 1990s

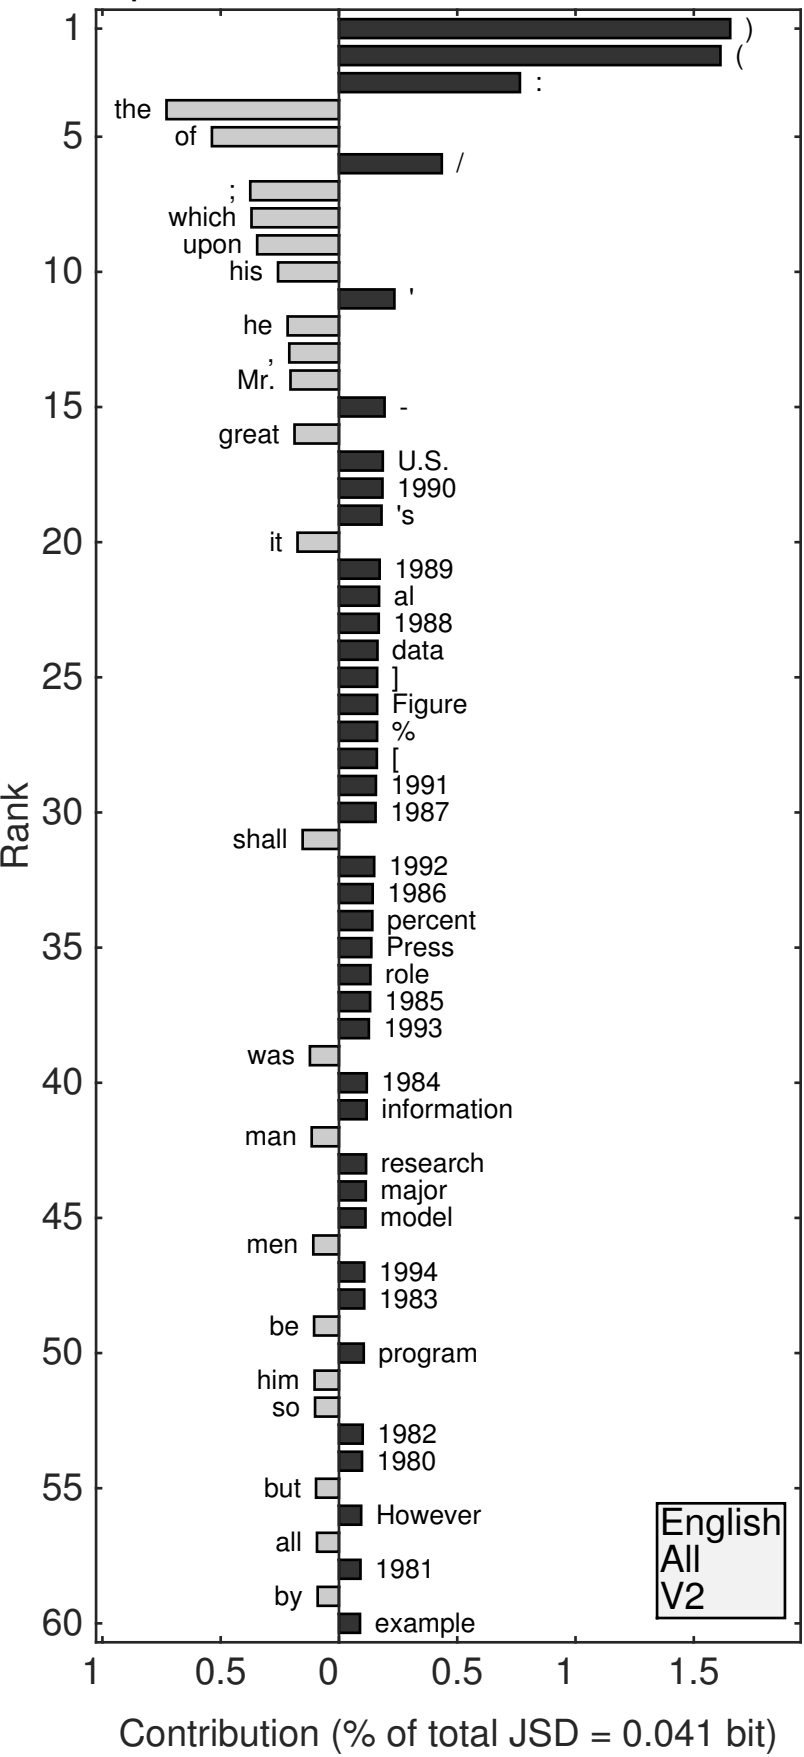

# Top JSD contributions: 1920s to 1930s

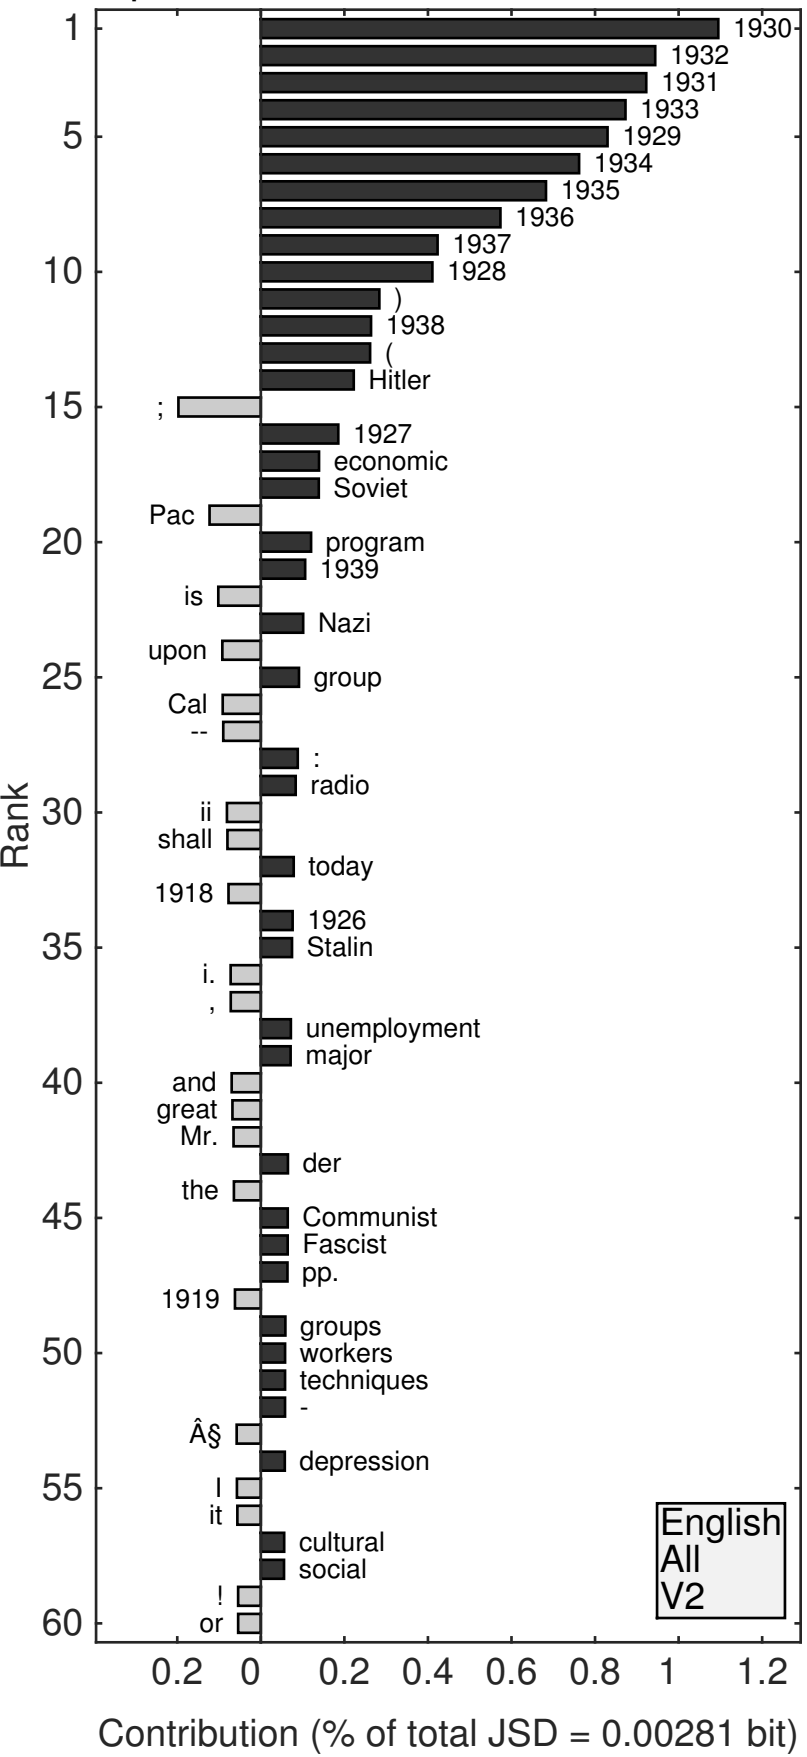

# Top JSD contributions: 1920s to 1940s

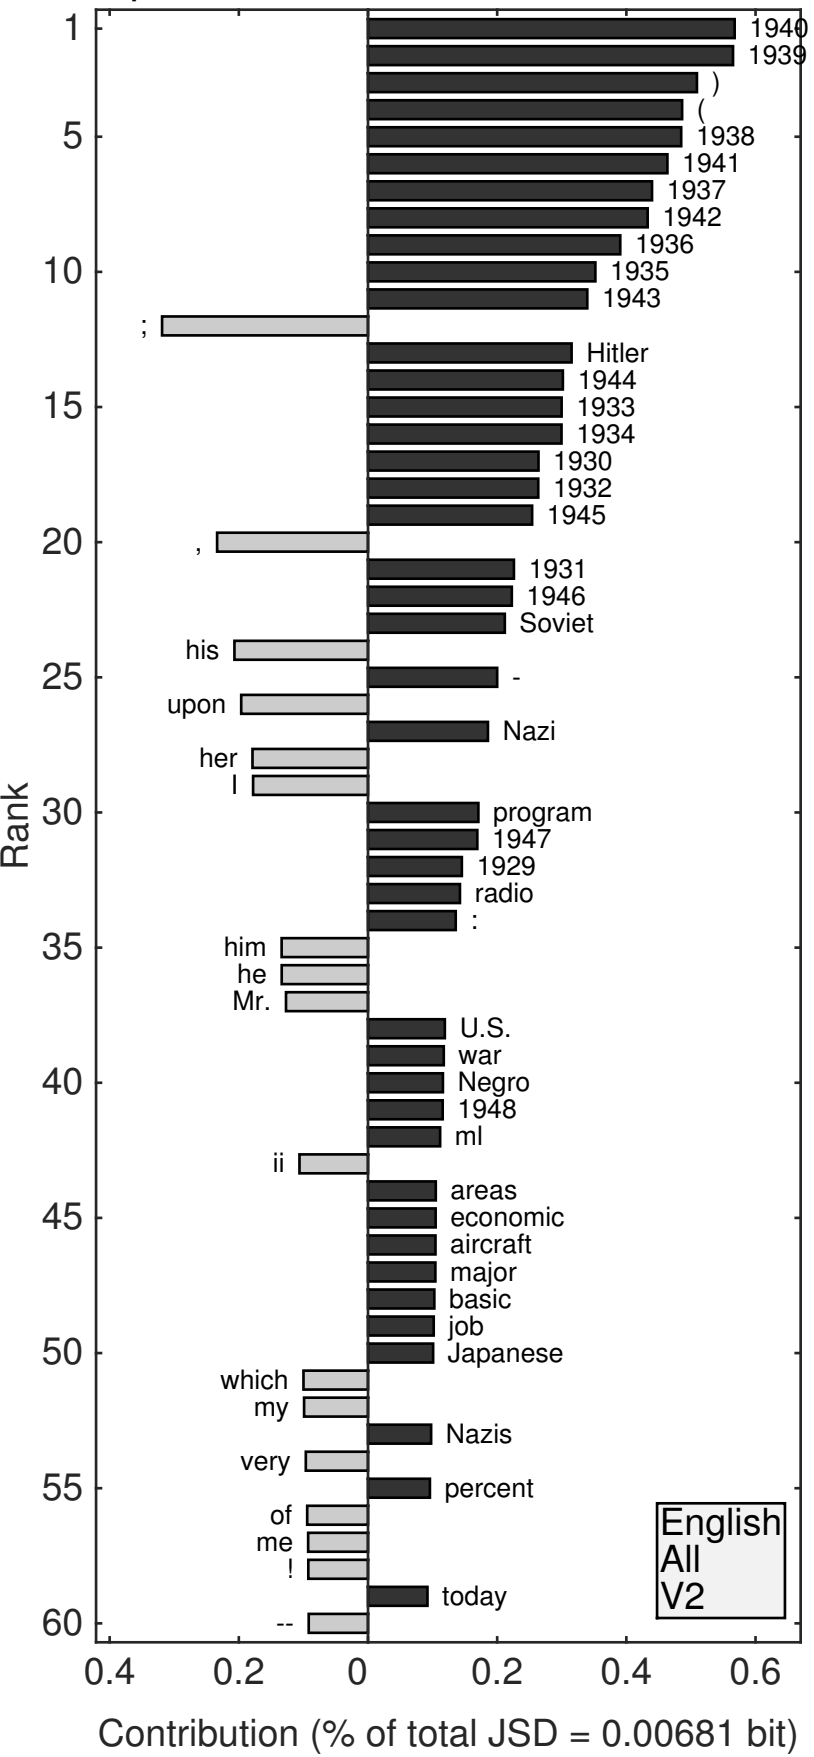

# Top JSD contributions: 1920s to 1950s

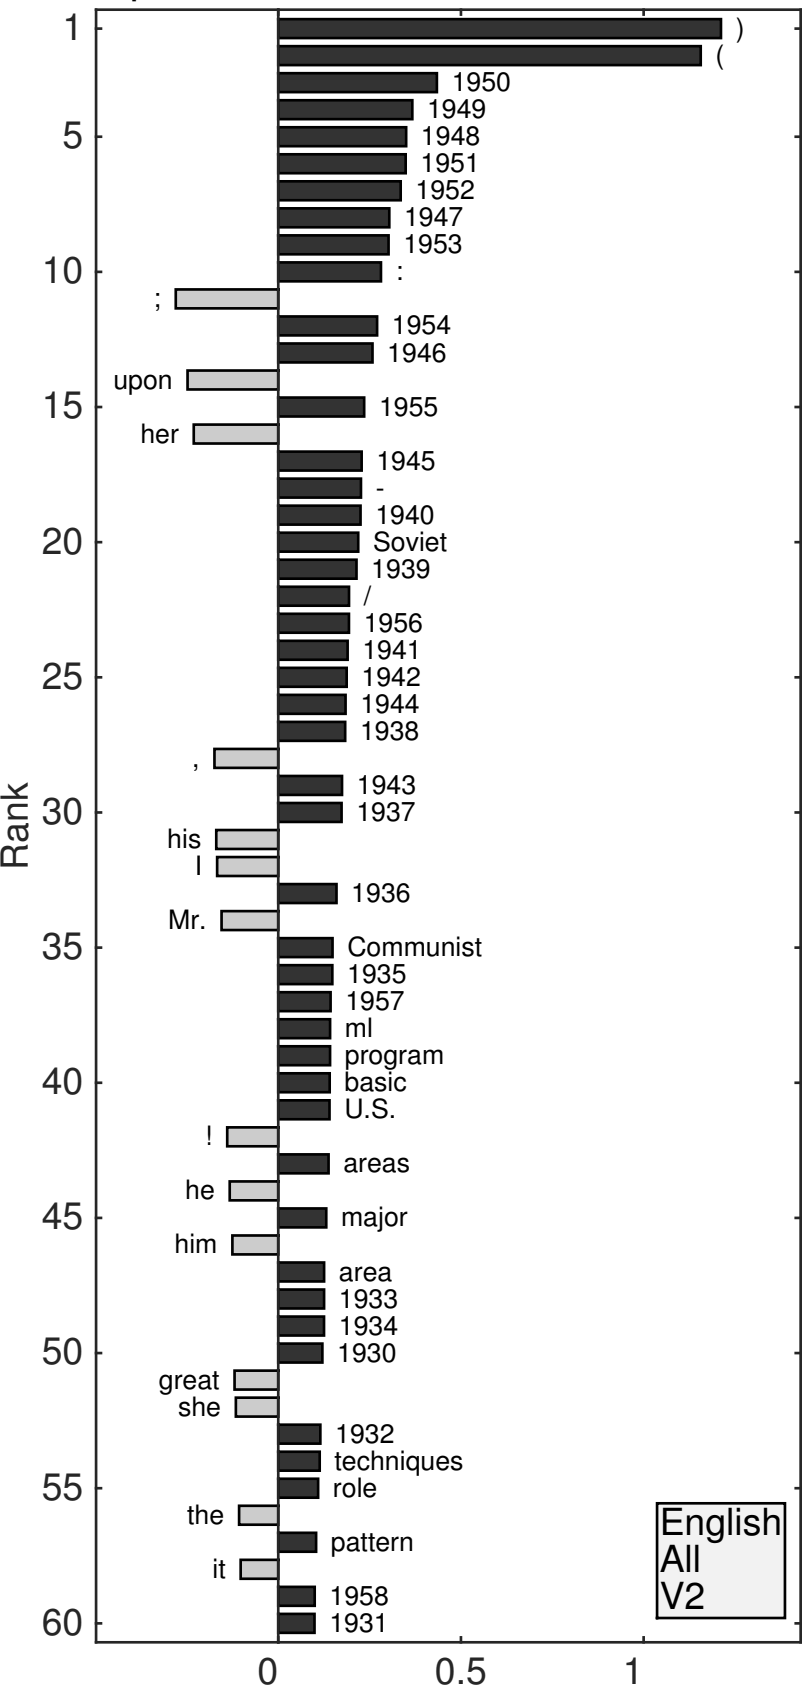

Contribution (% of total JSD = 0.00996 bit)

# Top JSD contributions: 1920s to 1960s

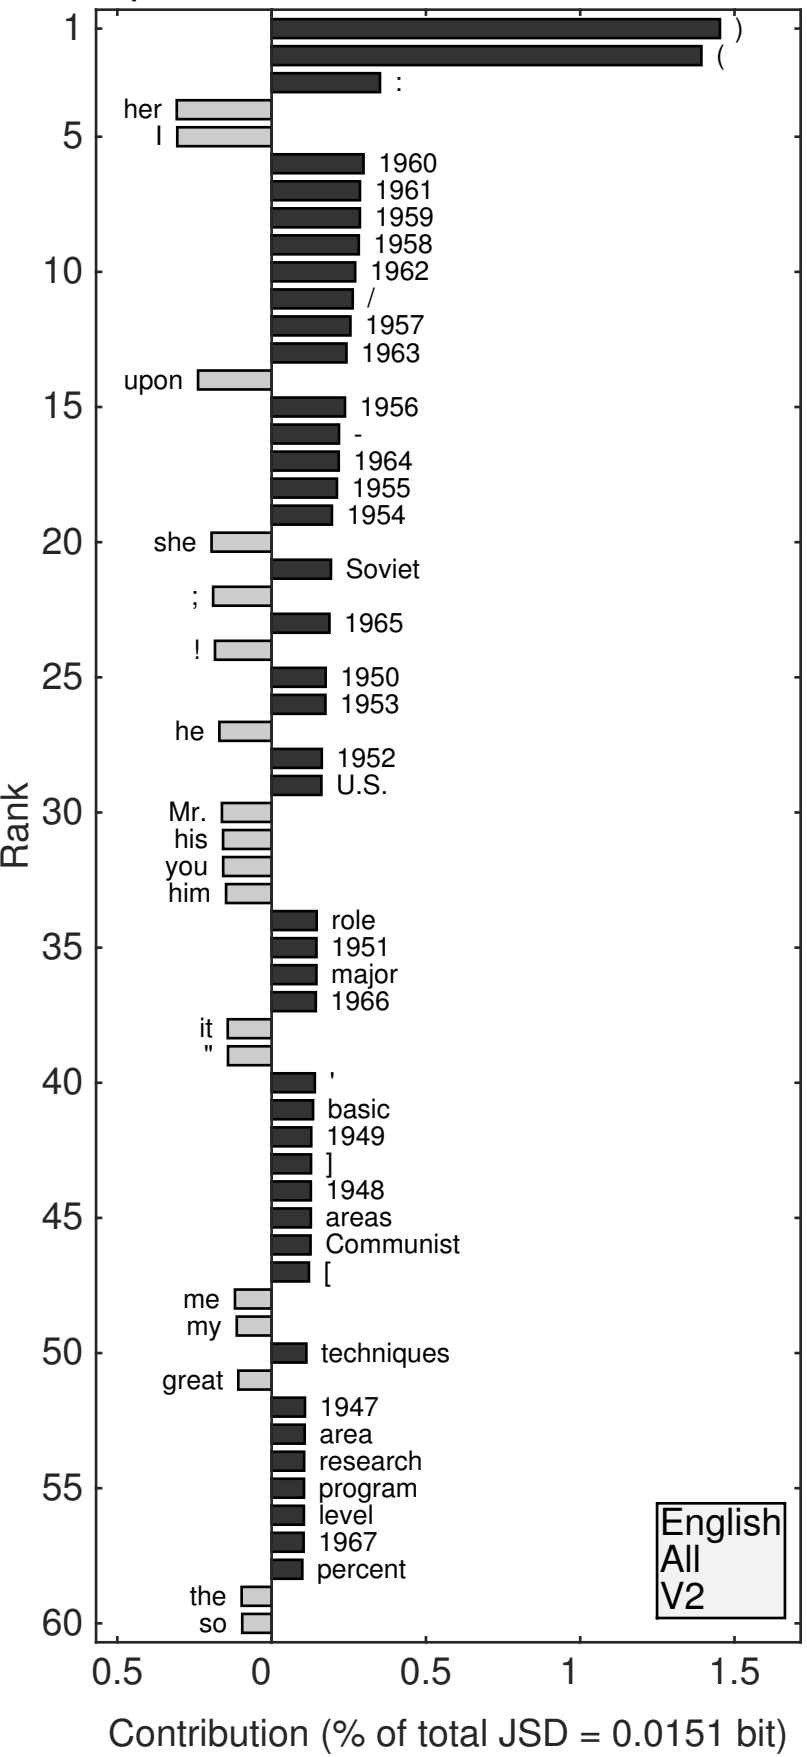

# Top JSD contributions: 1920s to 1970s

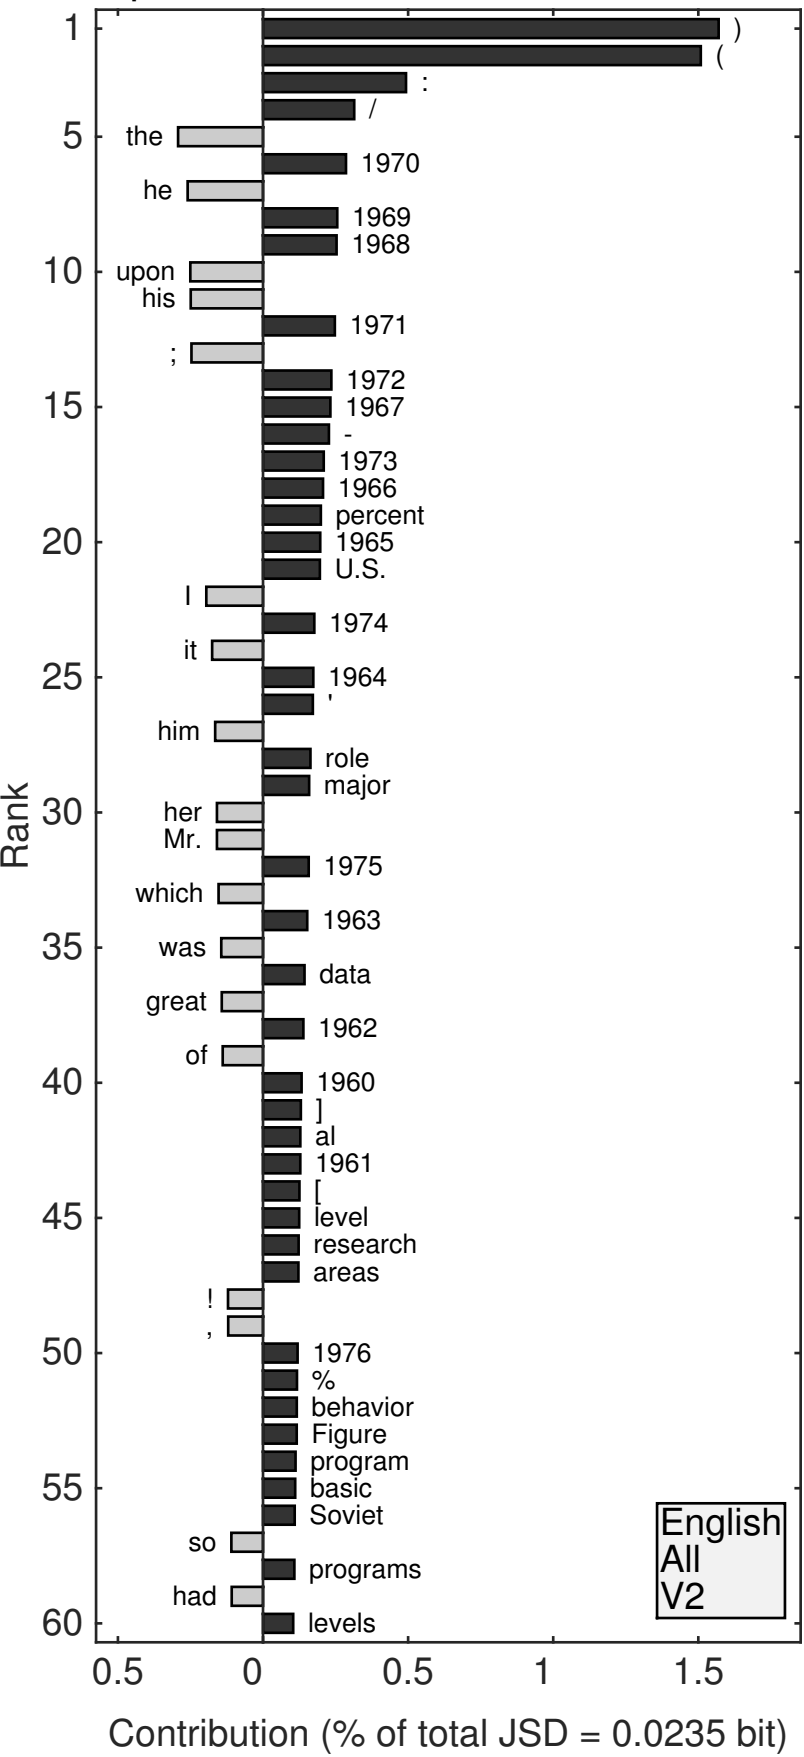

# Top JSD contributions: 1920s to 1980s

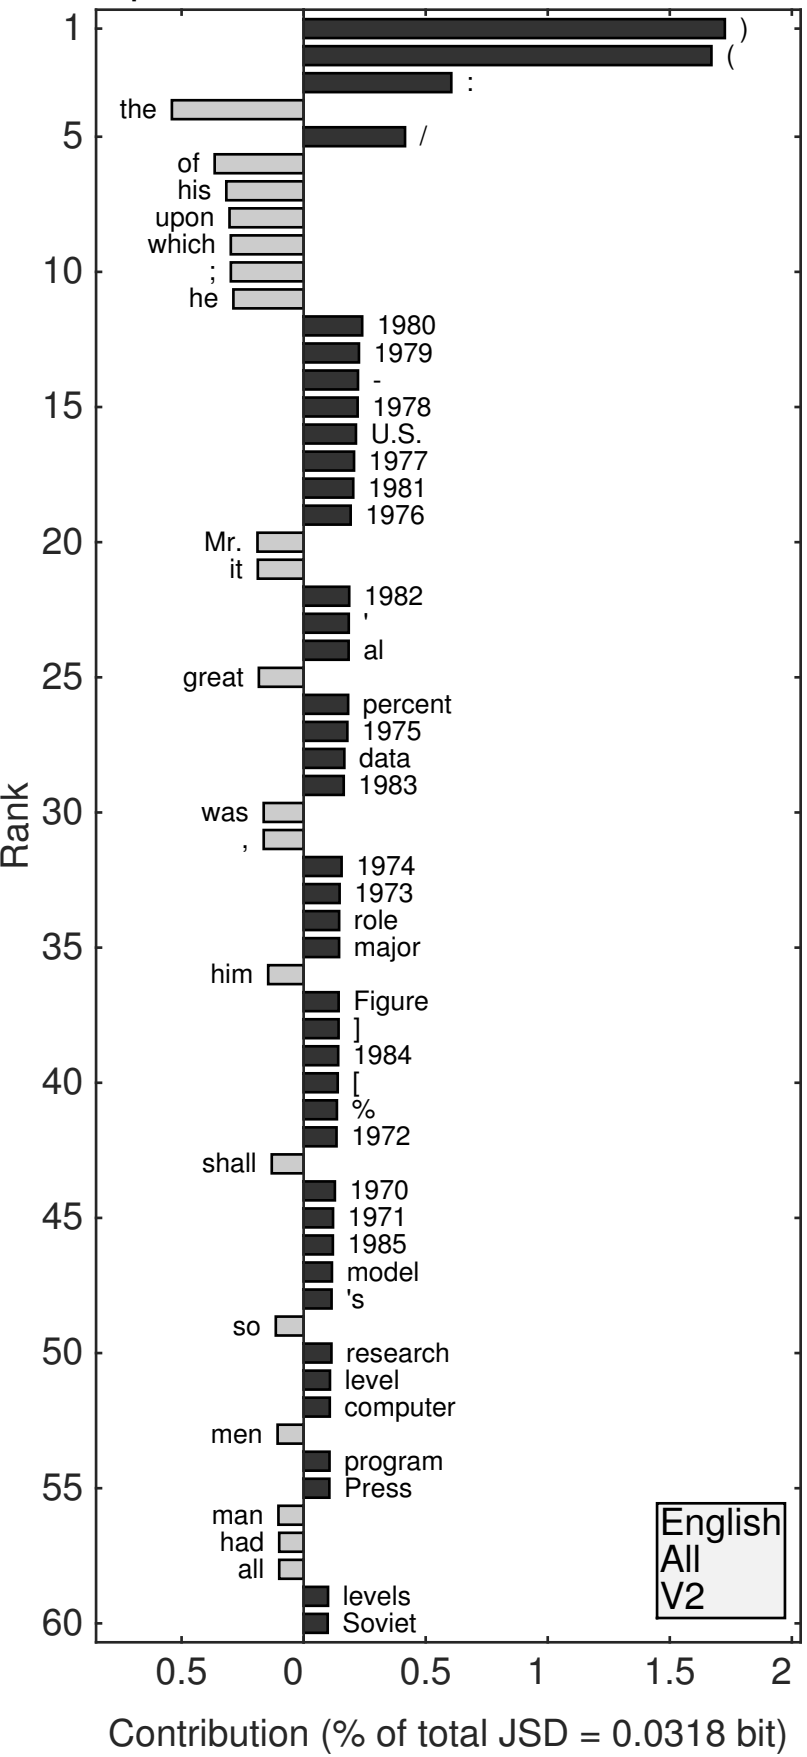



# Top JSD contributions: 1920s to 1990s

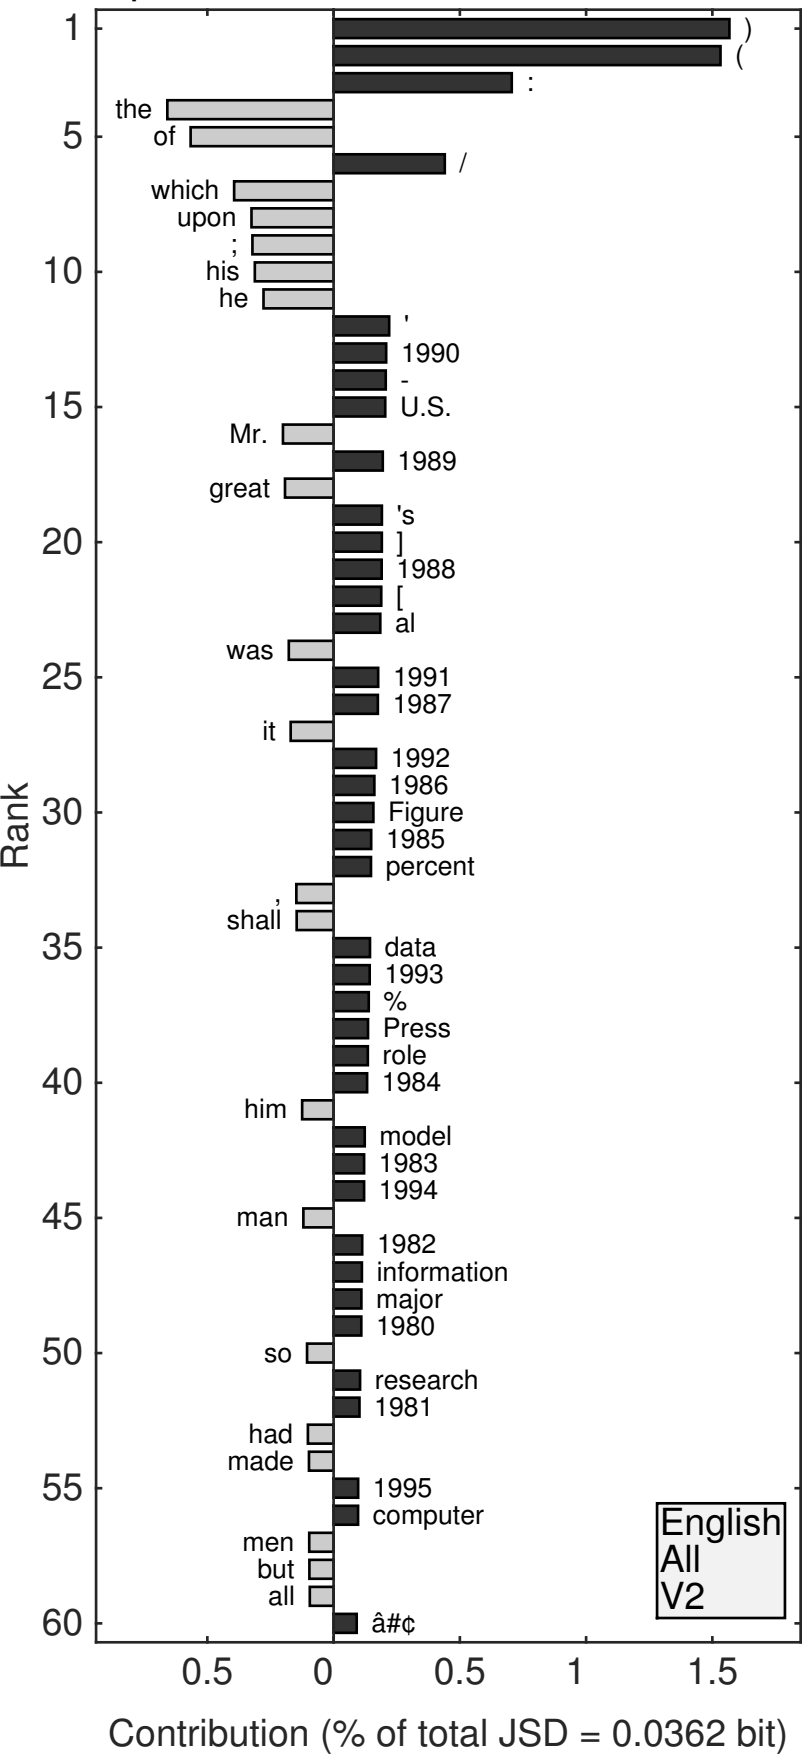

English  
All  
V2

# Top JSD contributions: 1930s to 1940s

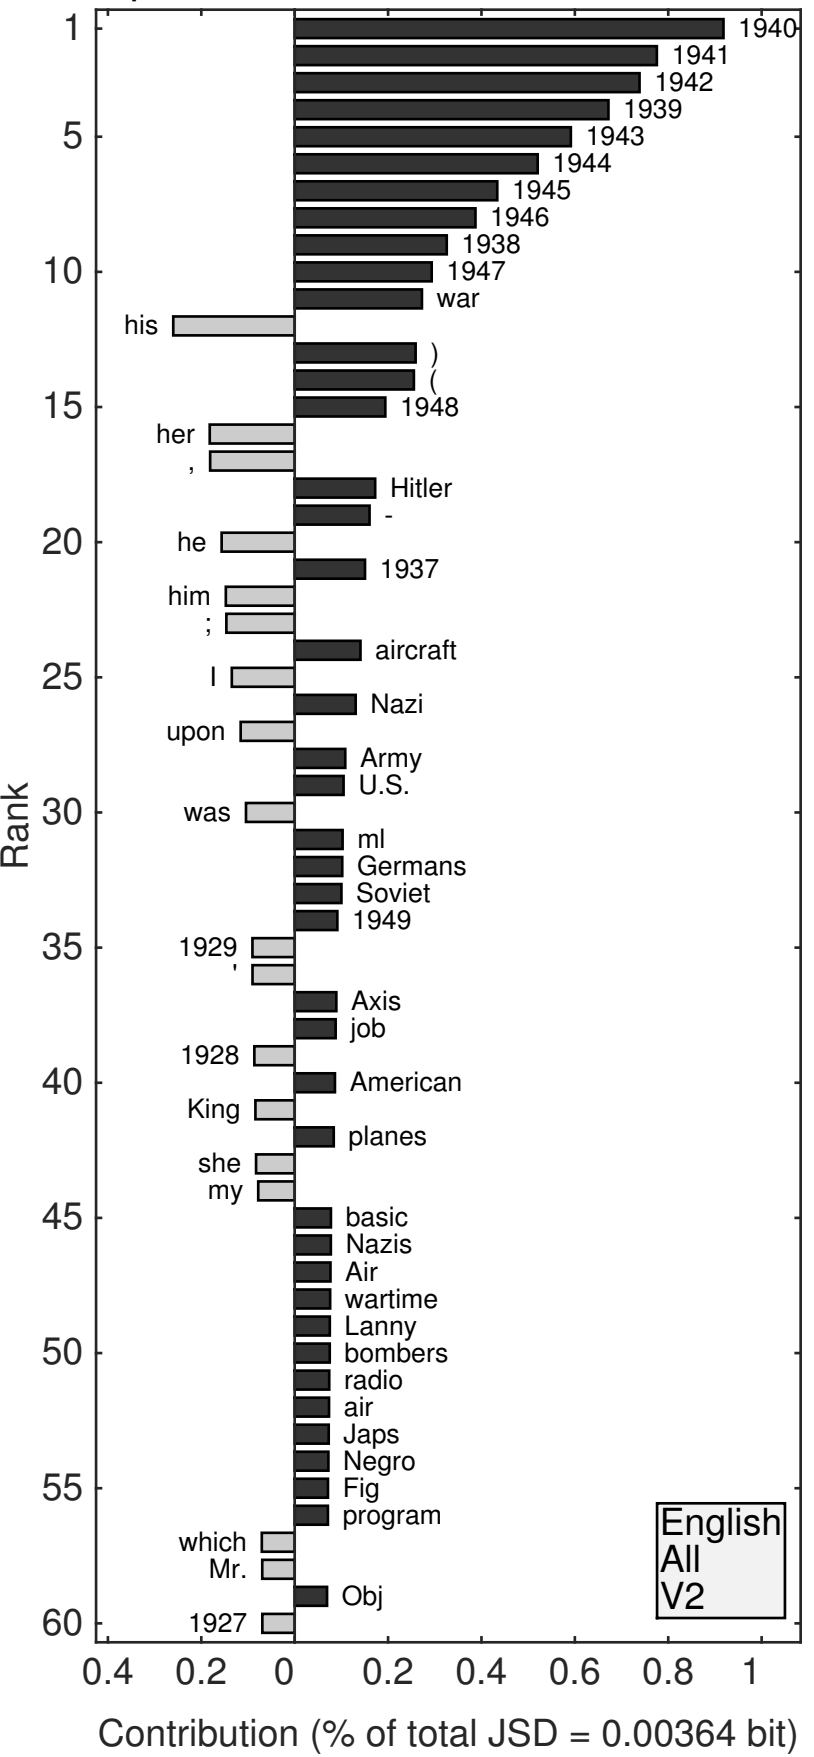

# Top JSD contributions: 1930s to 1950s

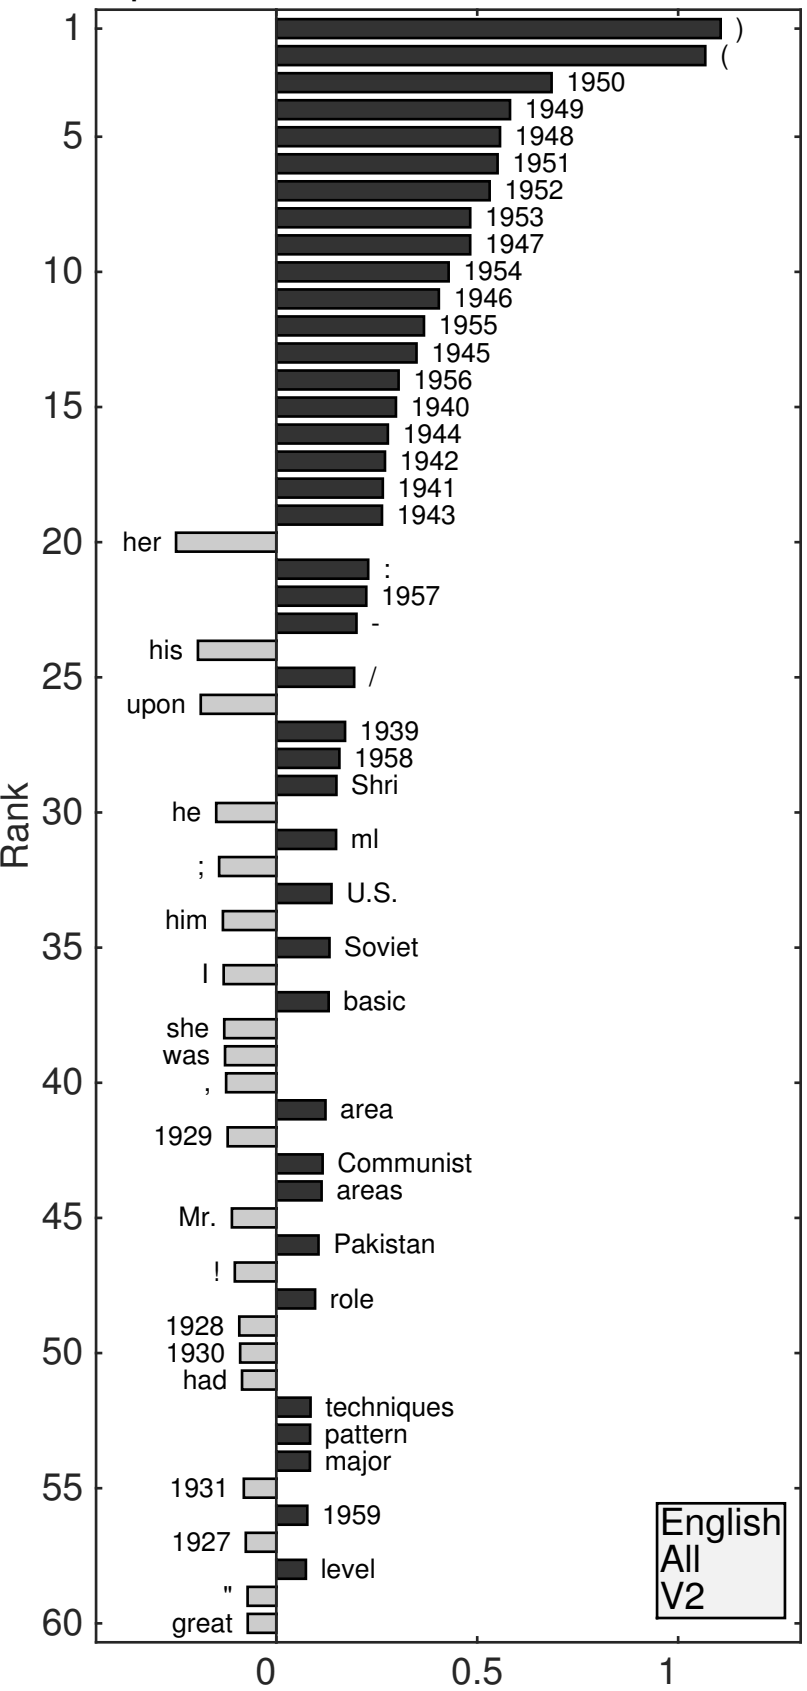

Contribution (% of total JSD = 0.00605 bit)

# Top JSD contributions: 1930s to 1960s

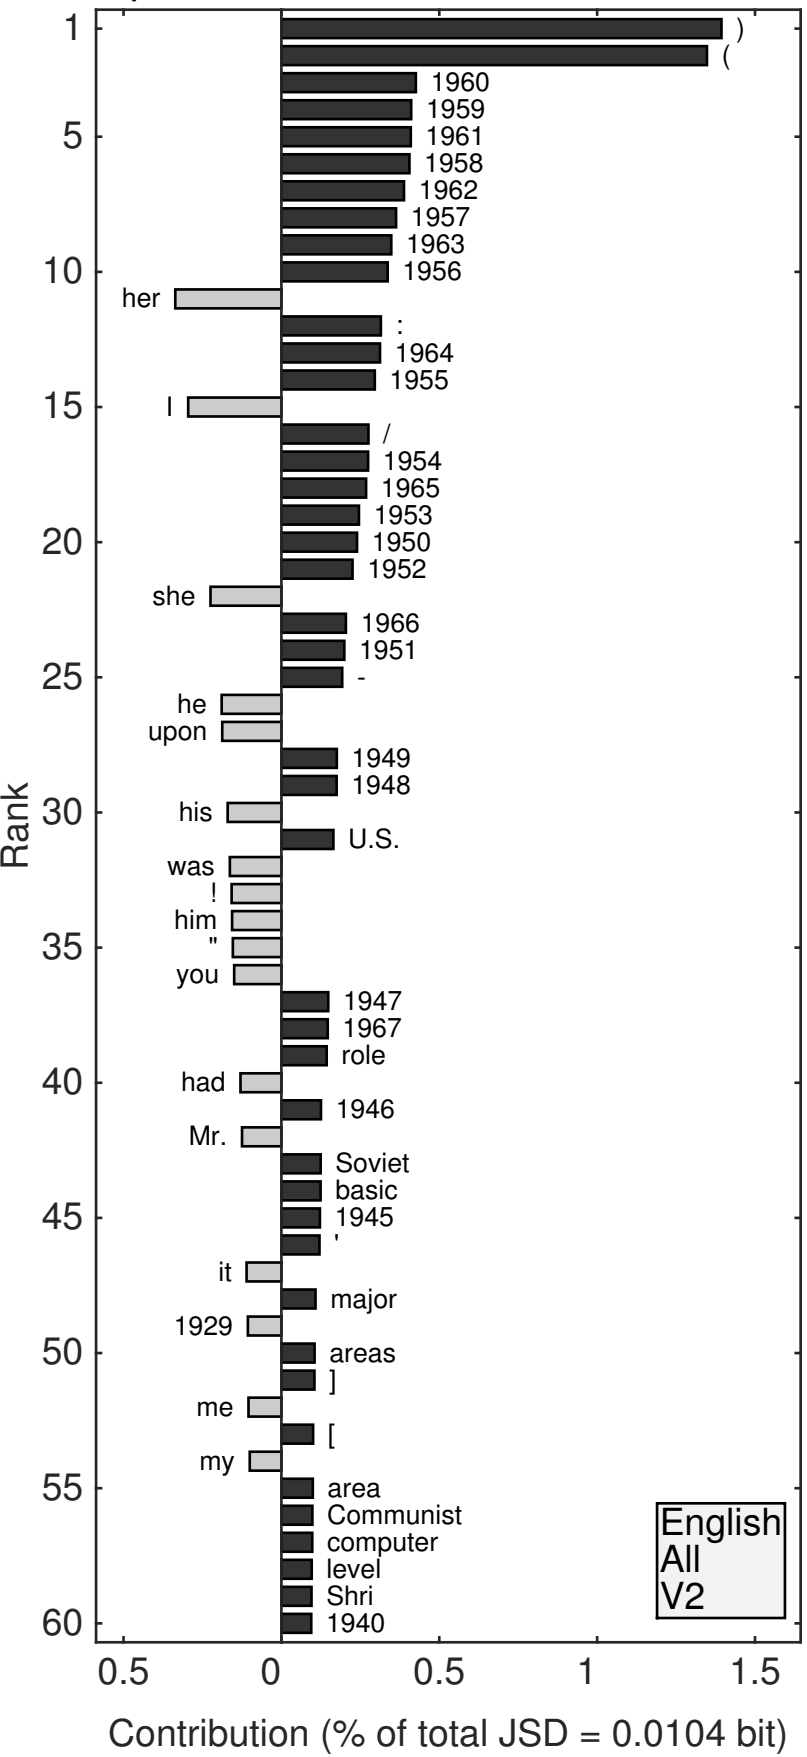

# Top JSD contributions: 1930s to 1970s

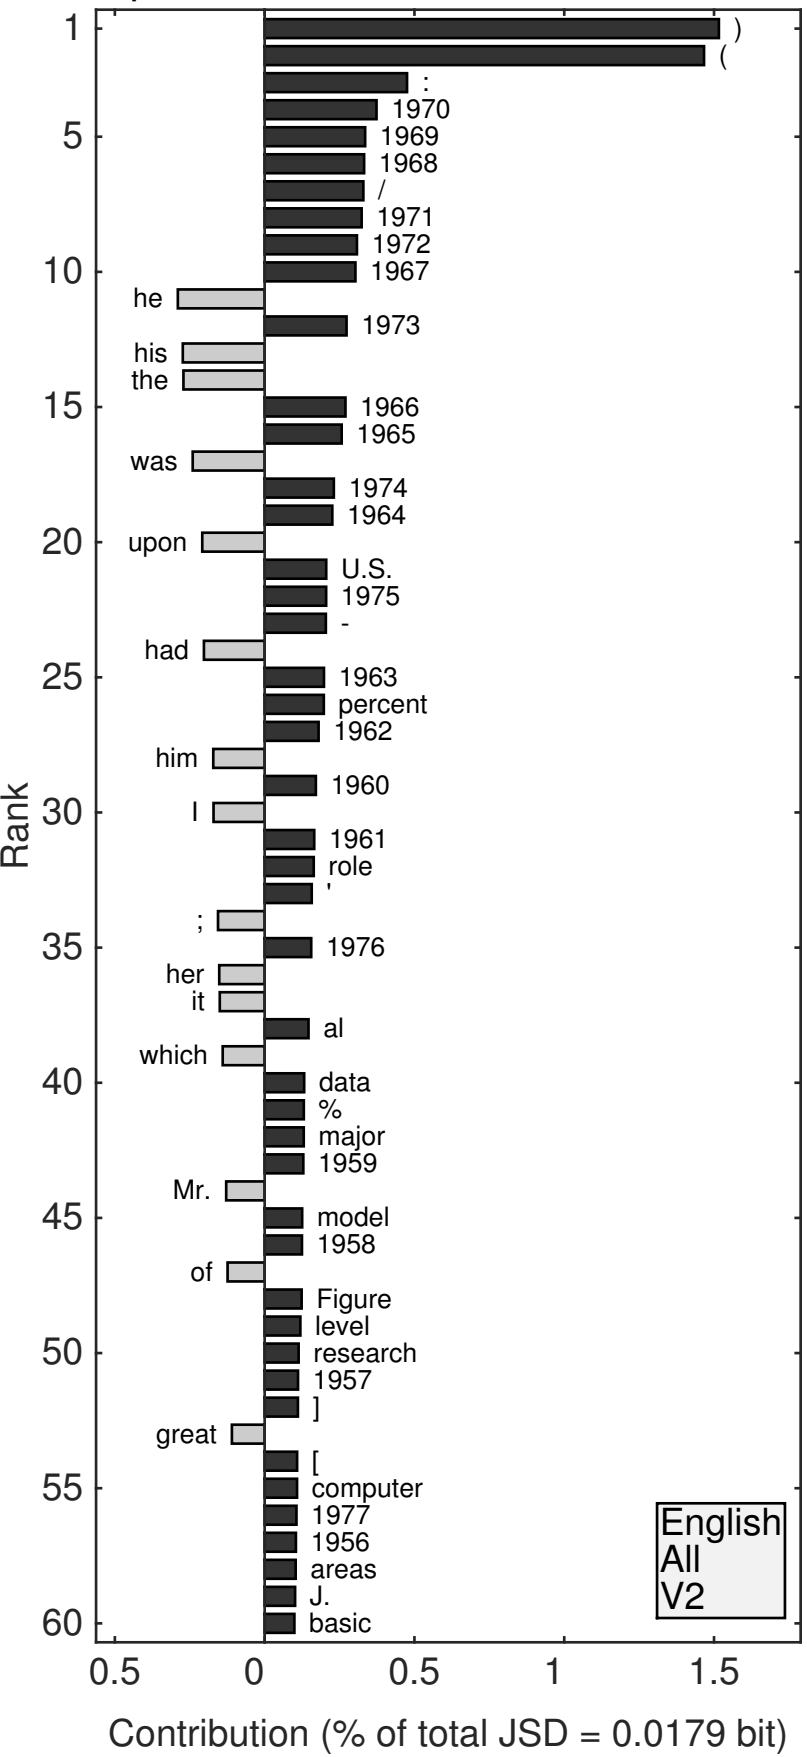

# Top JSD contributions: 1930s to 1980s

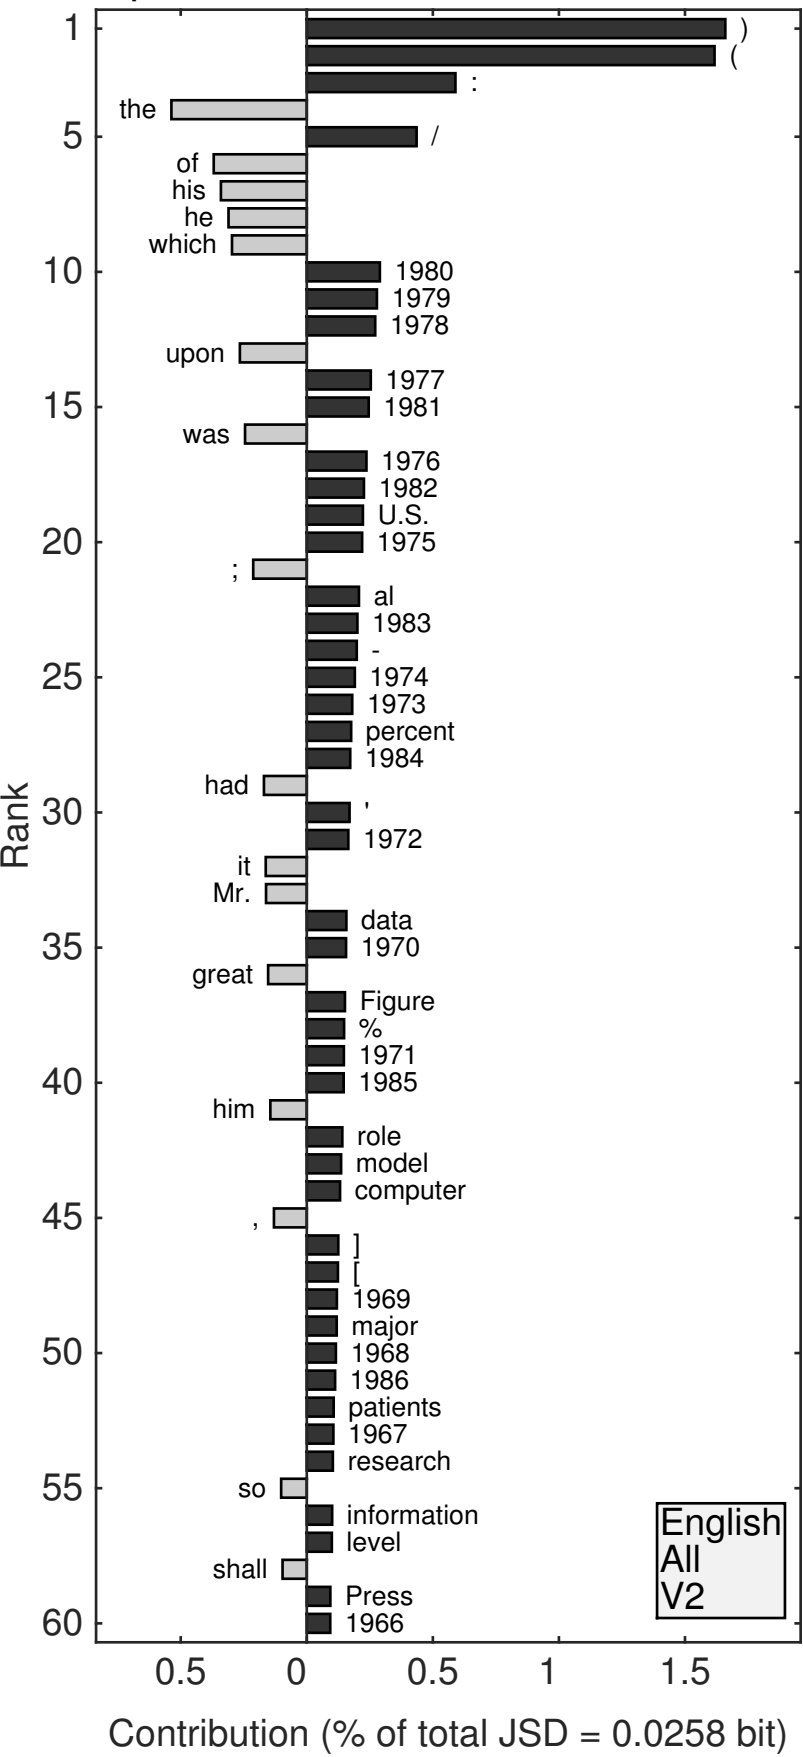

# Top JSD contributions: 1930s to 1990s

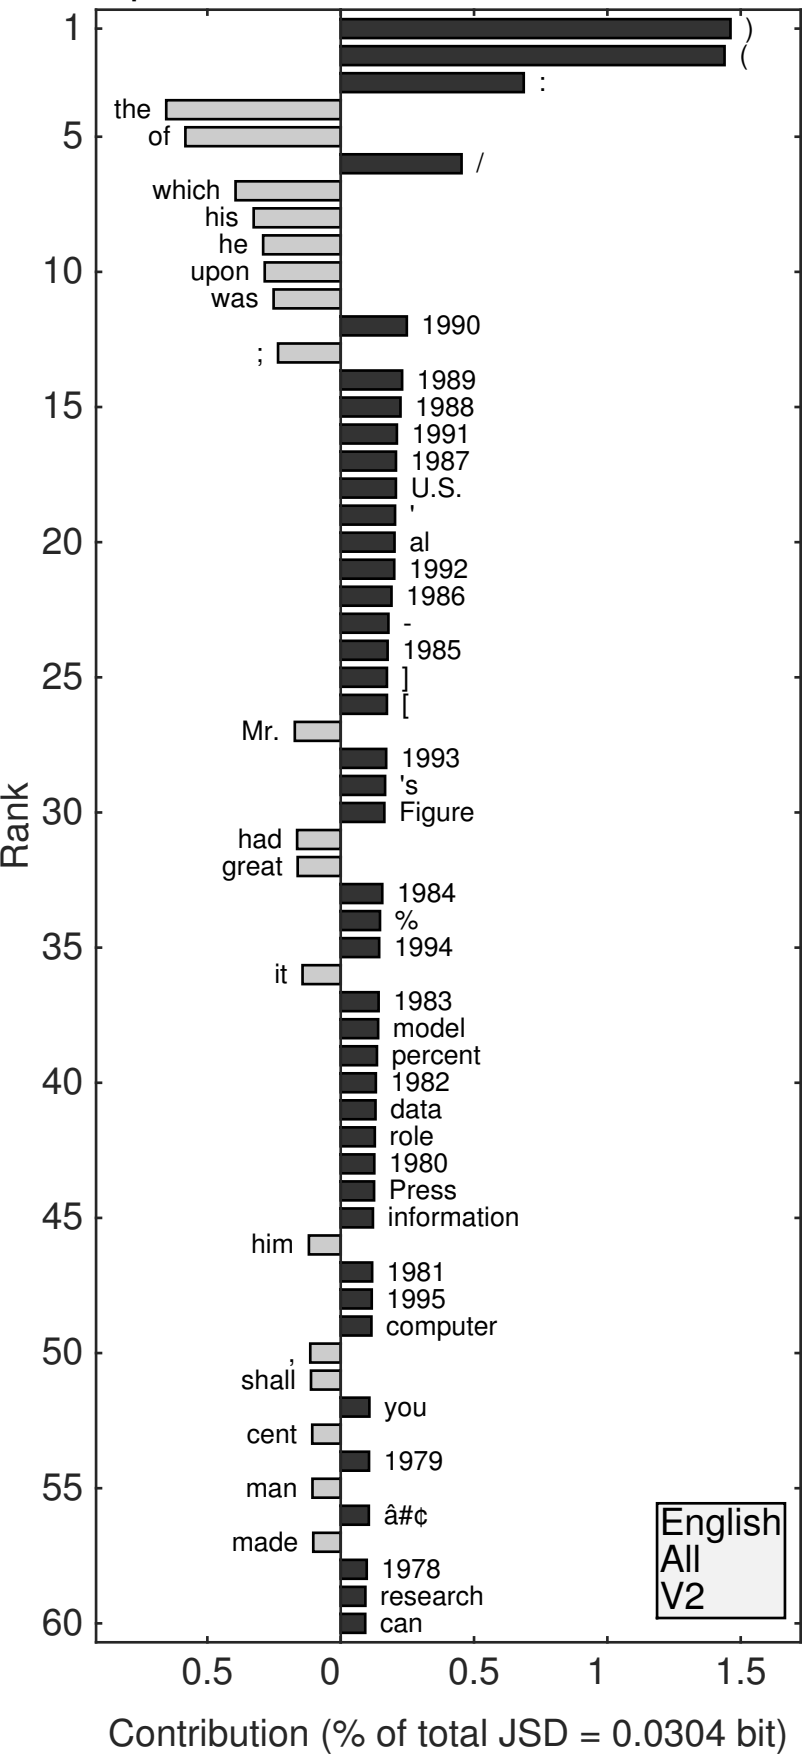

# Top JSD contributions: 1940s to 1950s

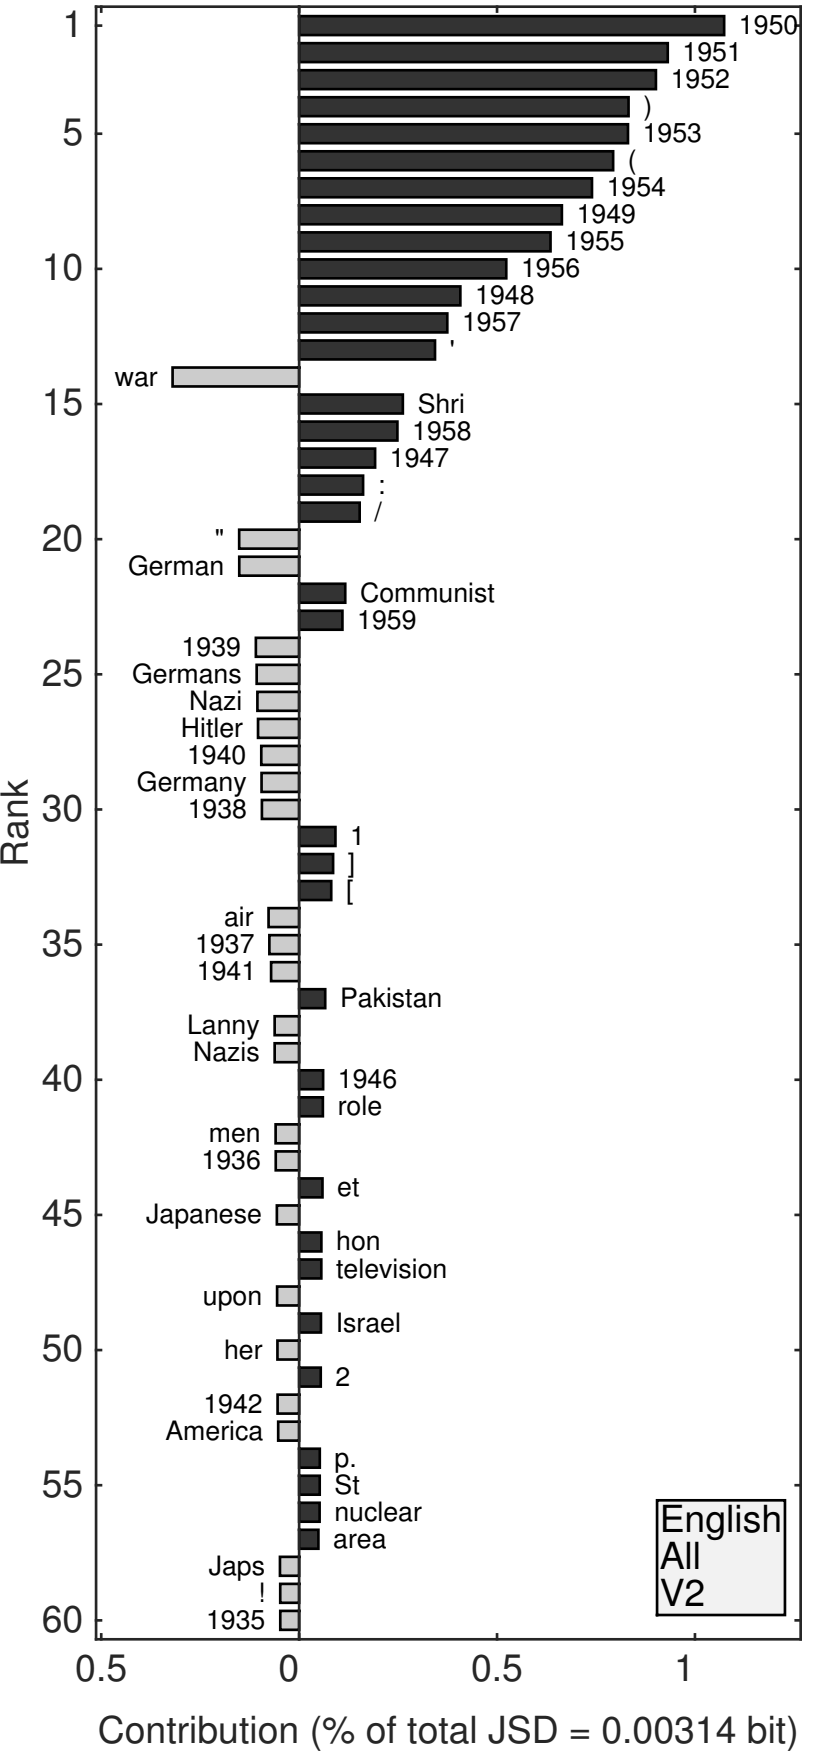



# Top JSD contributions: 1940s to 1960s

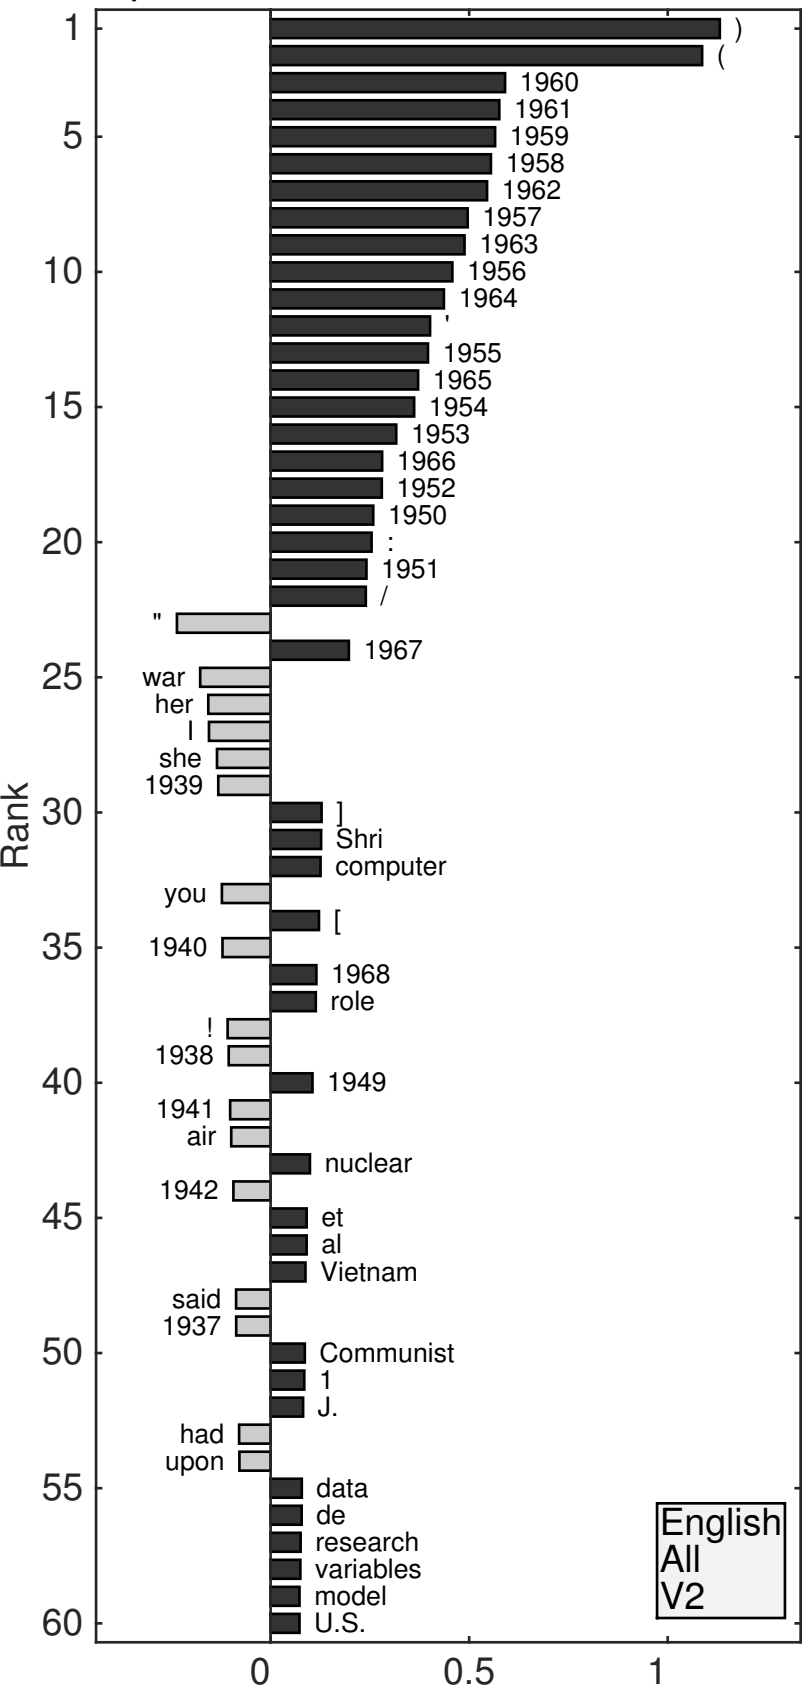

# Top JSD contributions: 1940s to 1970s

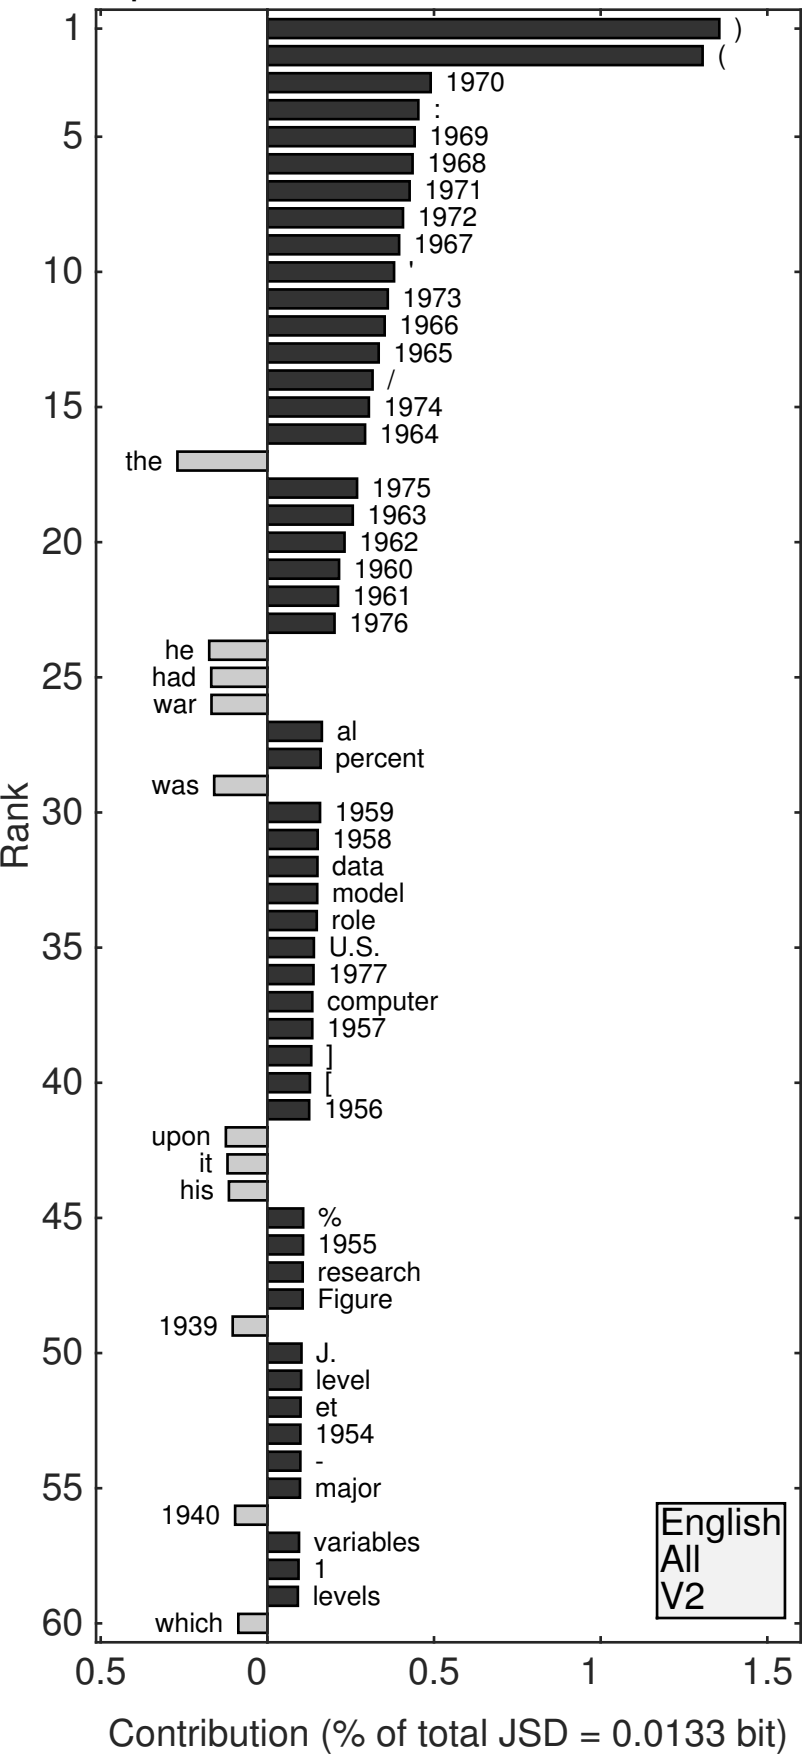

# Top JSD contributions: 1940s to 1980s

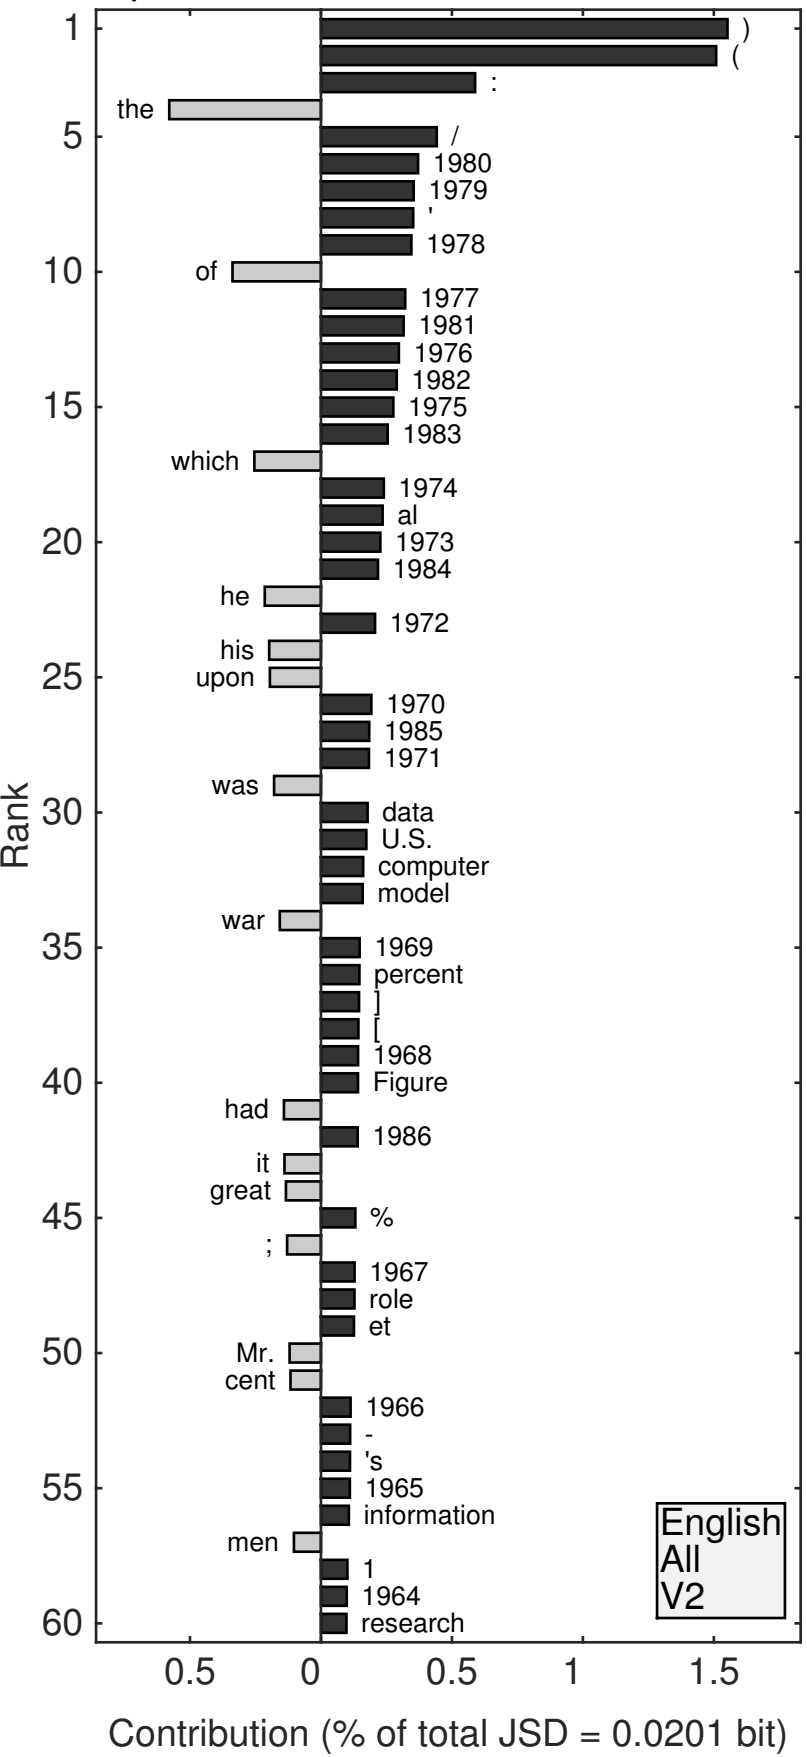

# Top JSD contributions: 1940s to 1990s

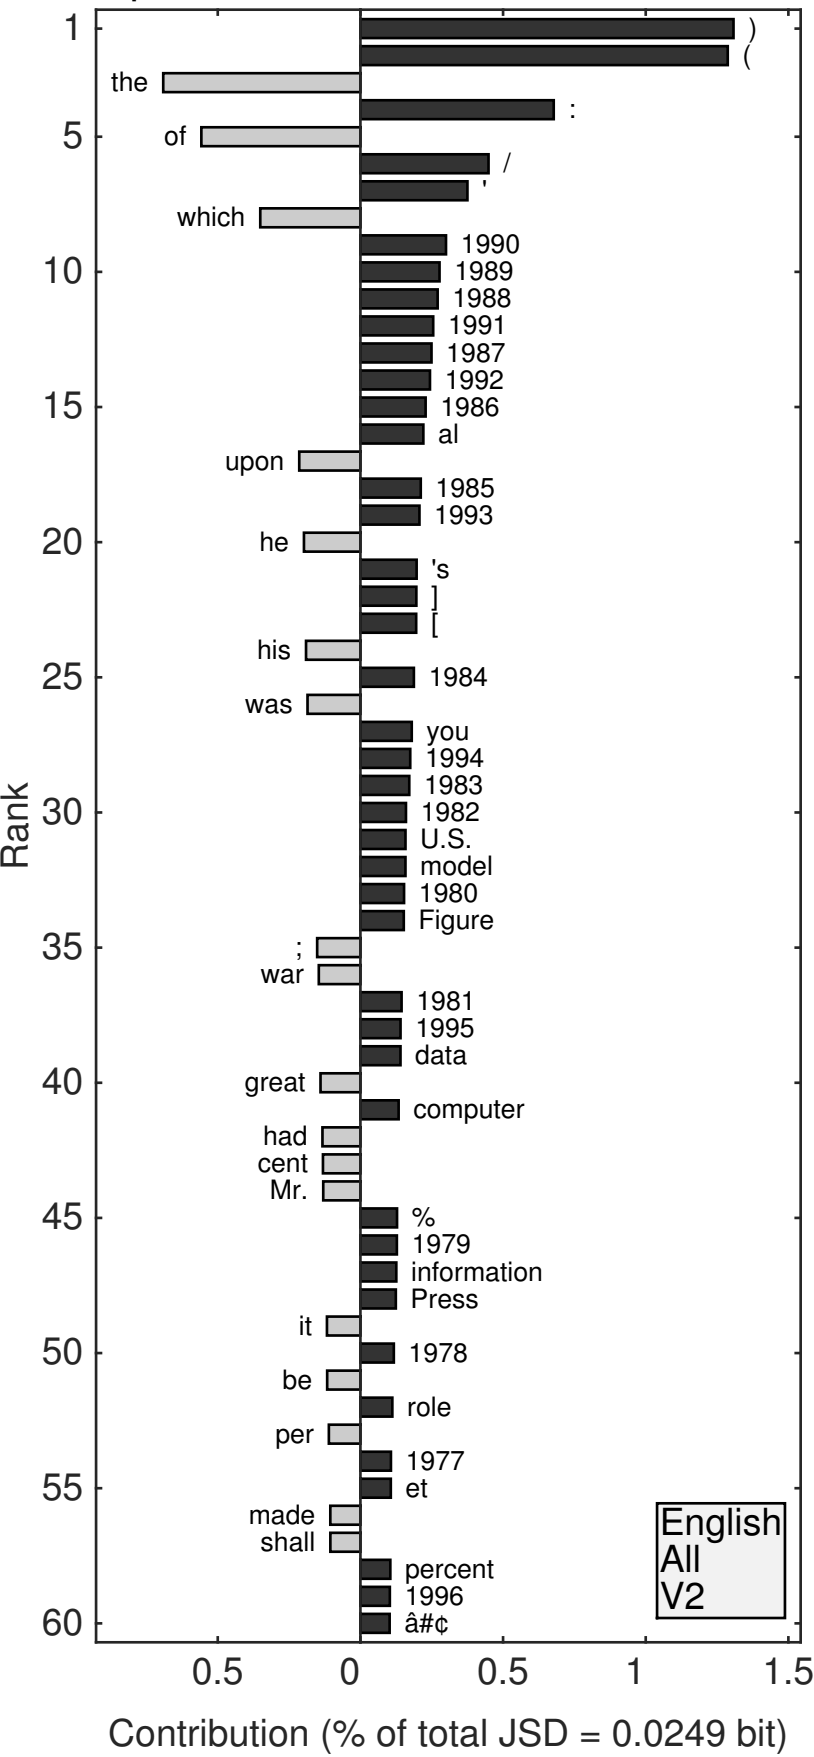

# Top JSD contributions: 1950s to 1960s

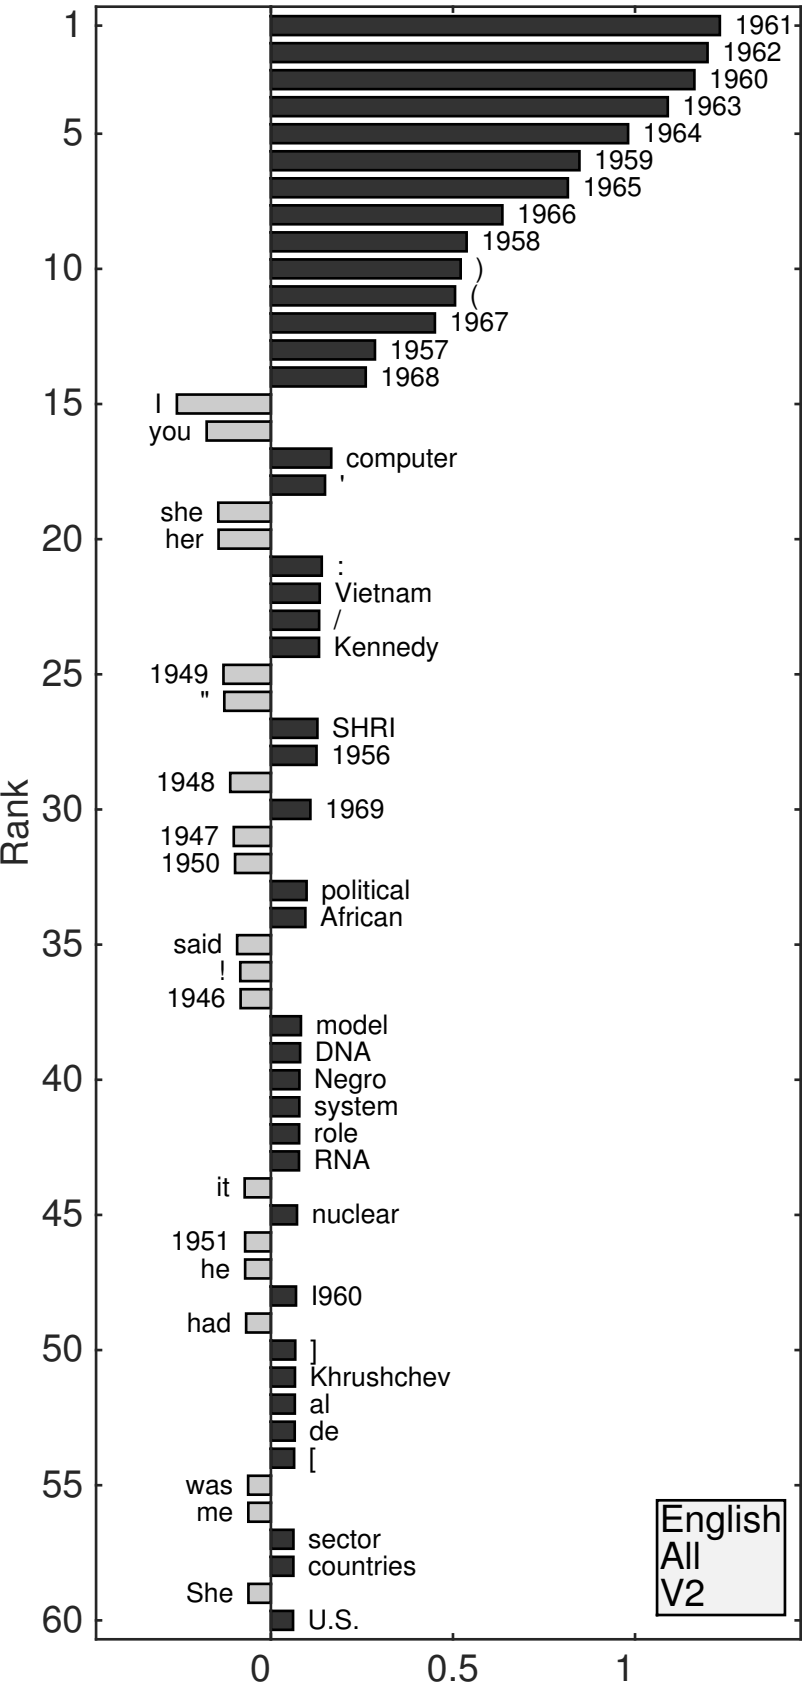

Contribution (% of total JSD = 0.00288 bit)

# Top JSD contributions: 1950s to 1970s

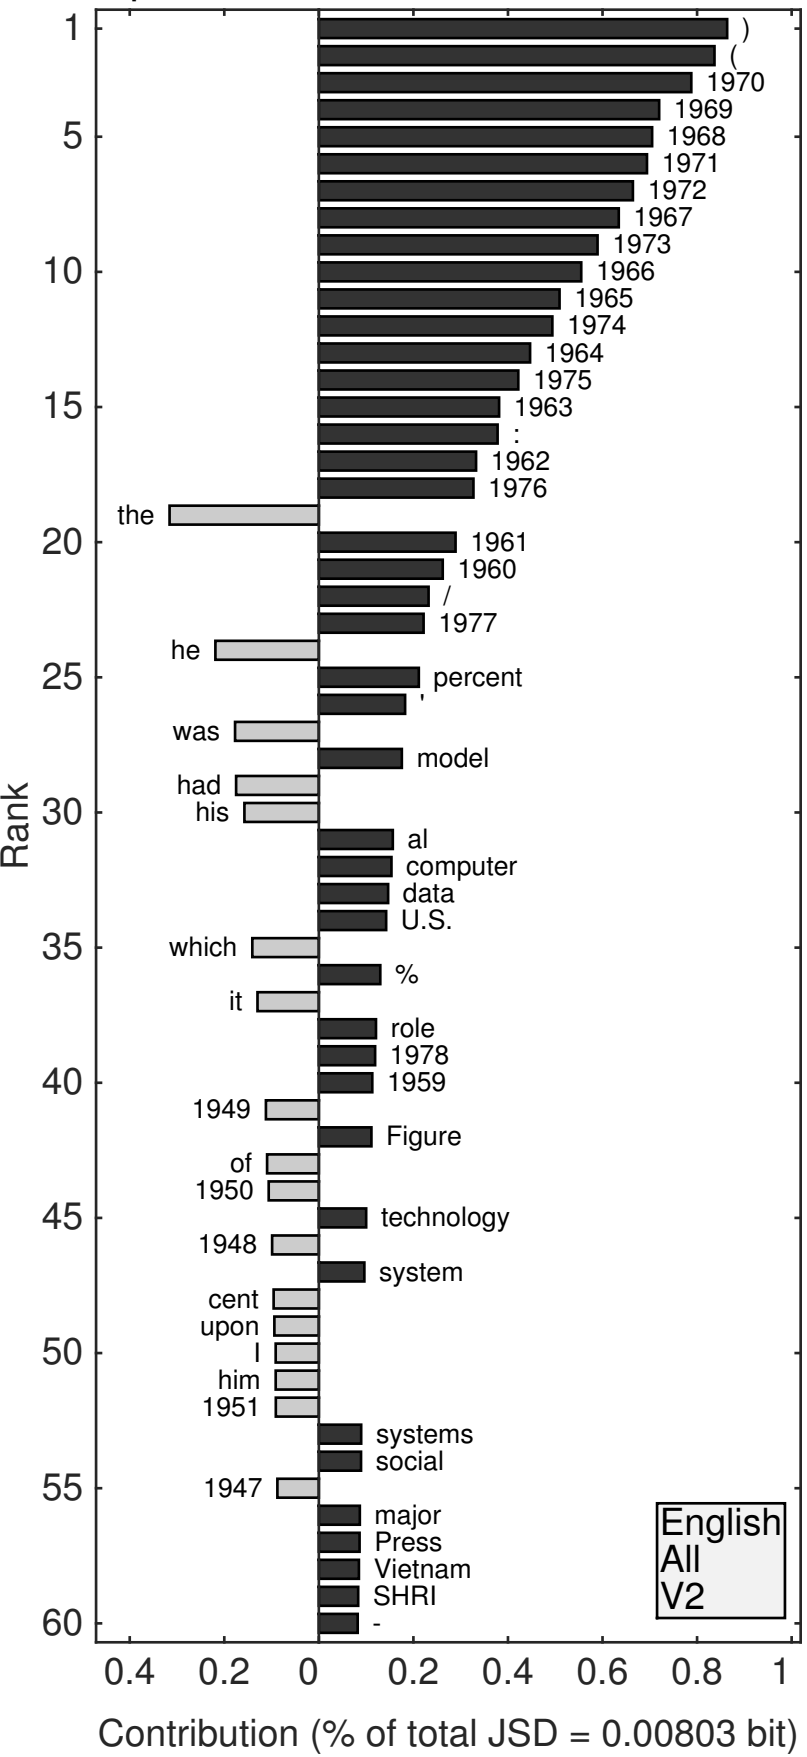

# Top JSD contributions: 1950s to 1980s

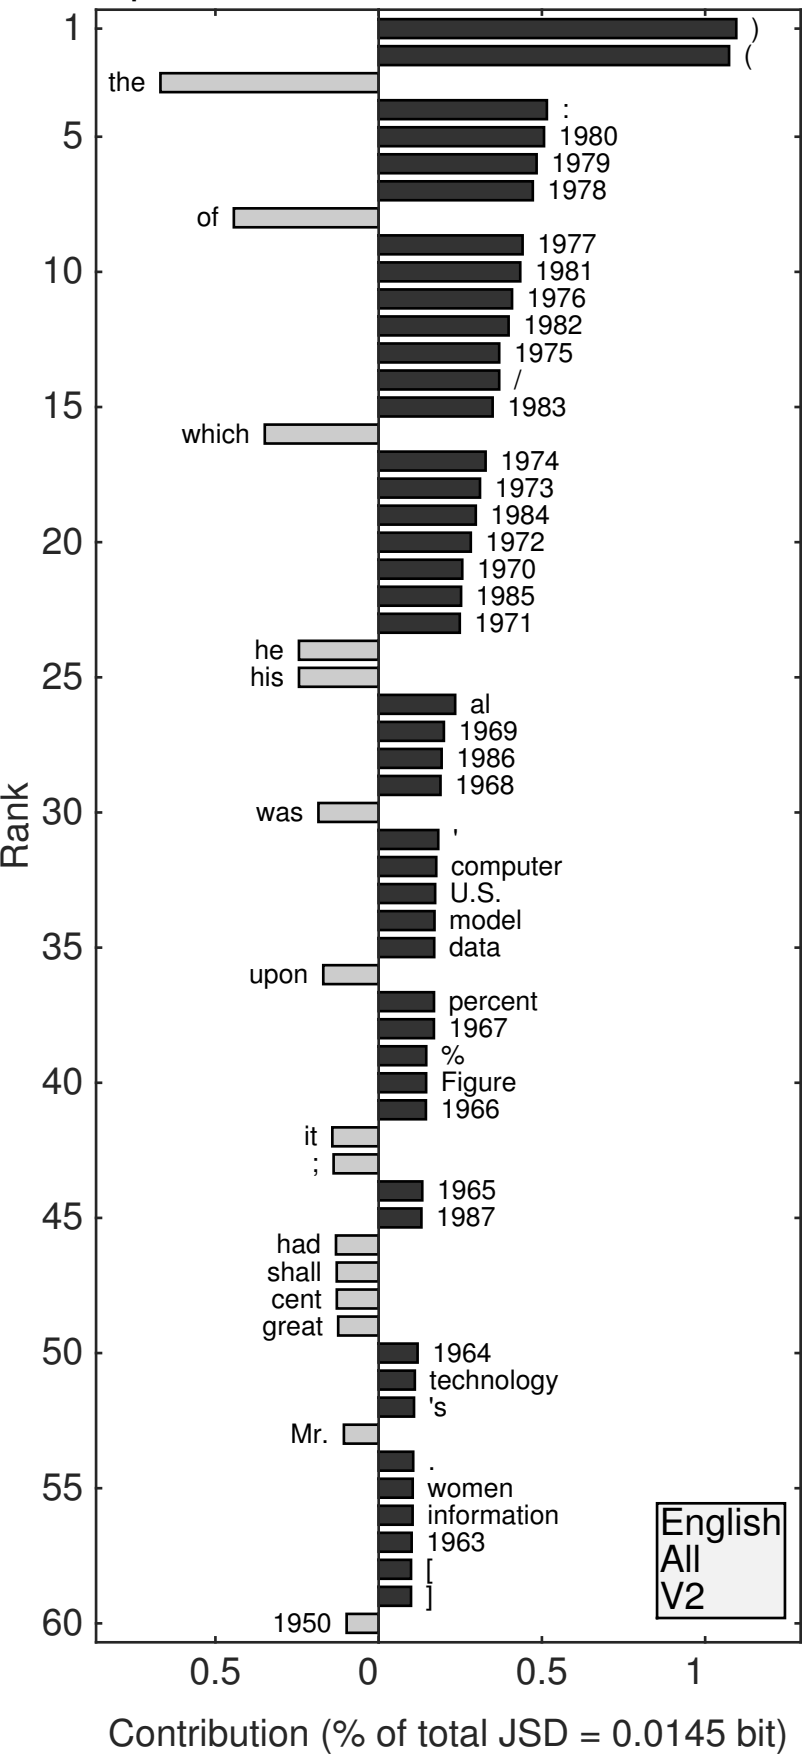

# Top JSD contributions: 1950s to 1990s

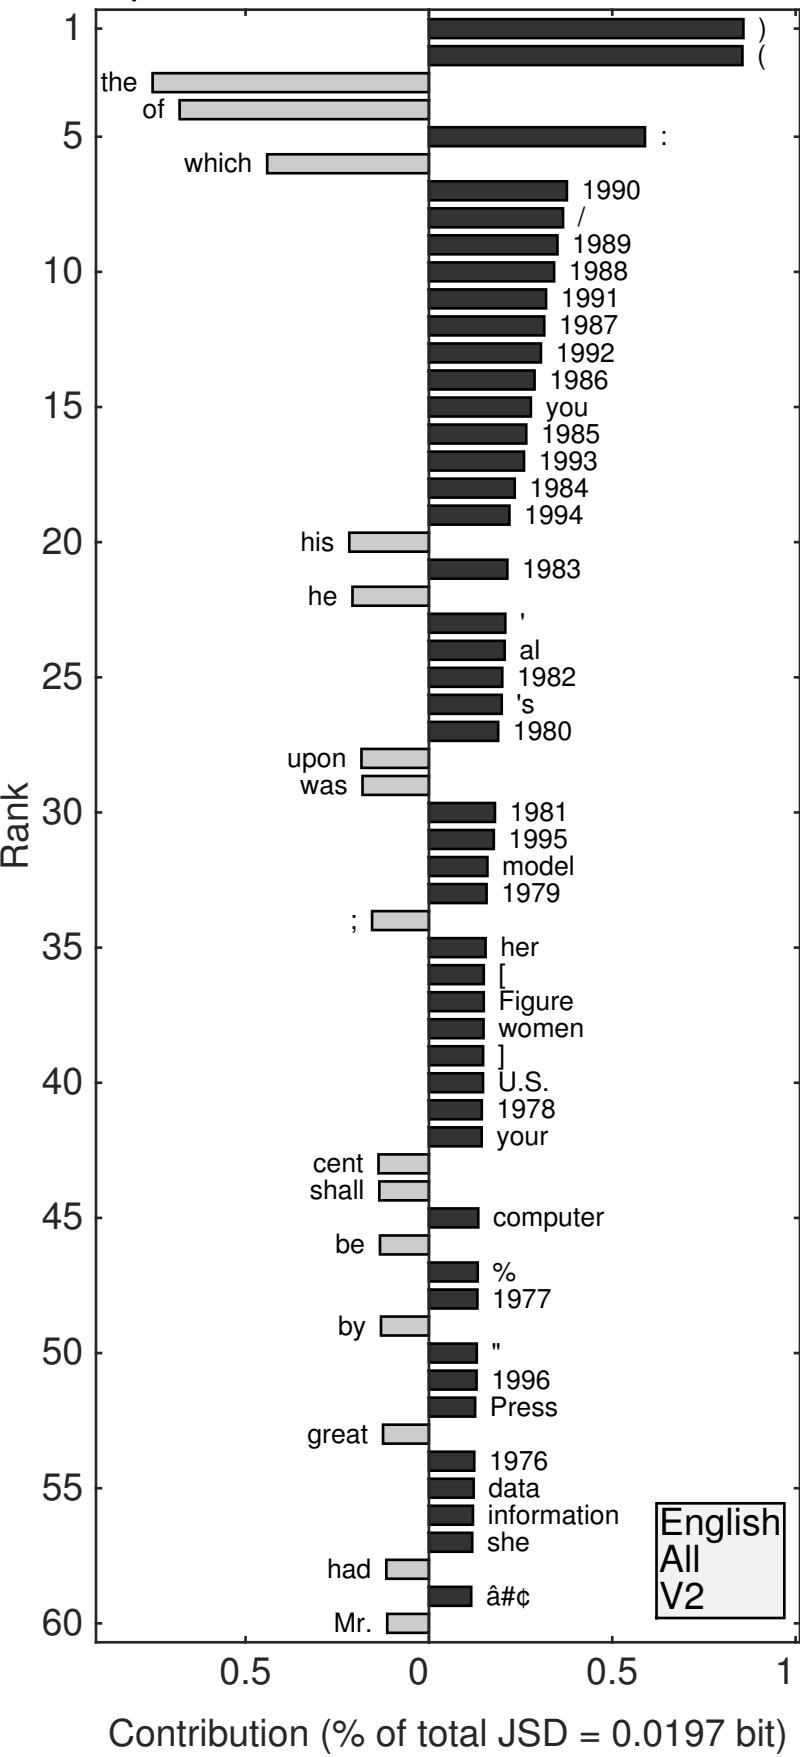



# Top JSD contributions: 1960s to 1970s

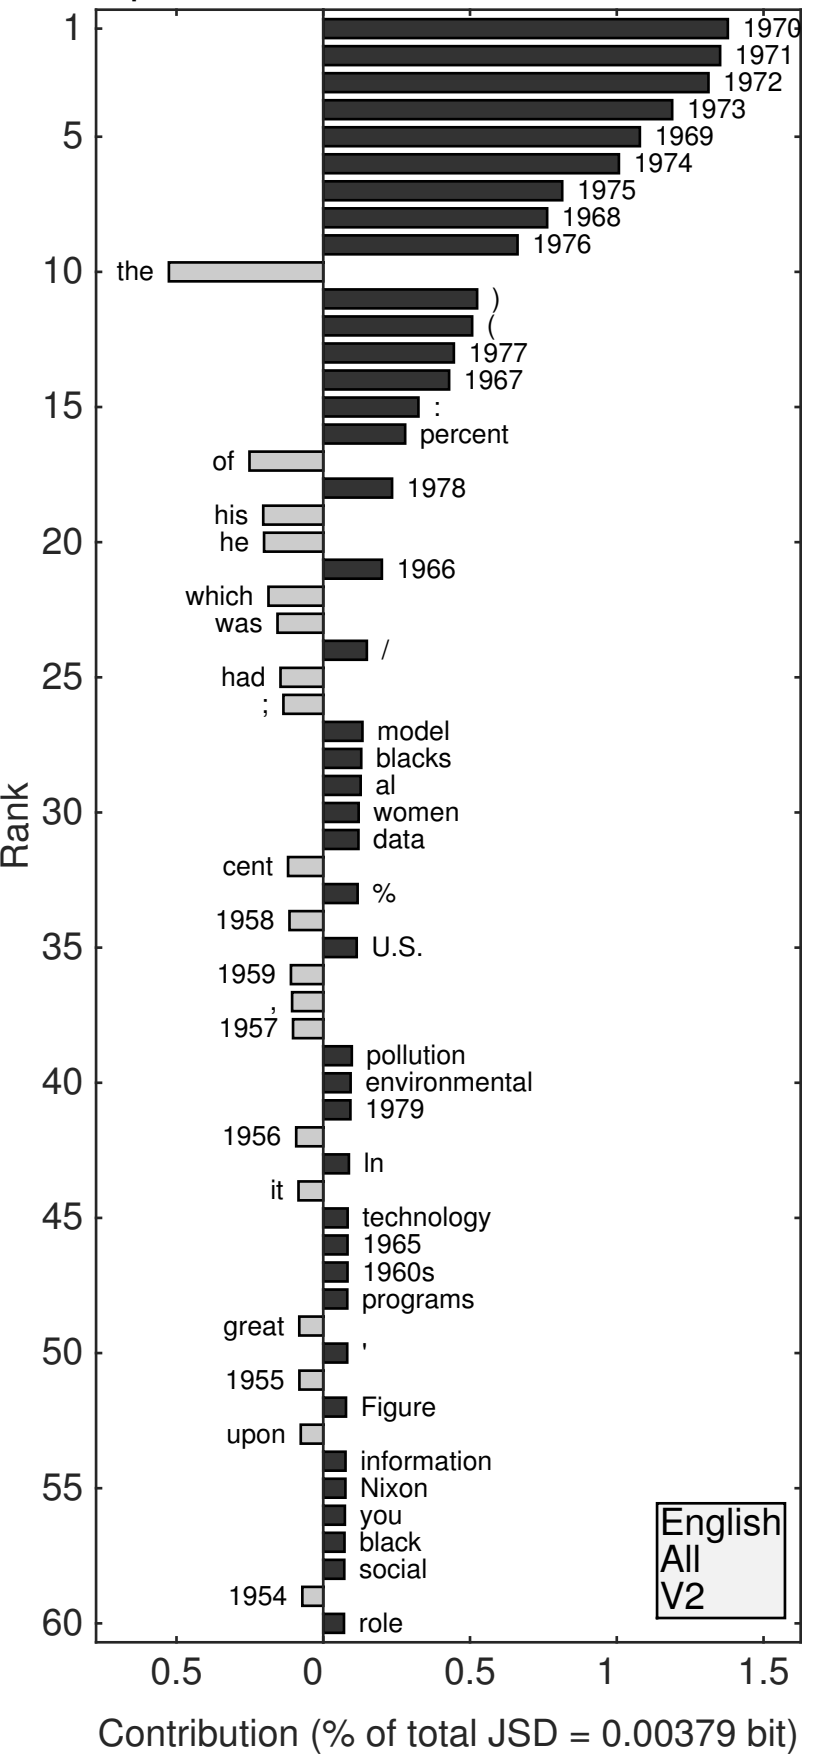

# Top JSD contributions: 1960s to 1980s

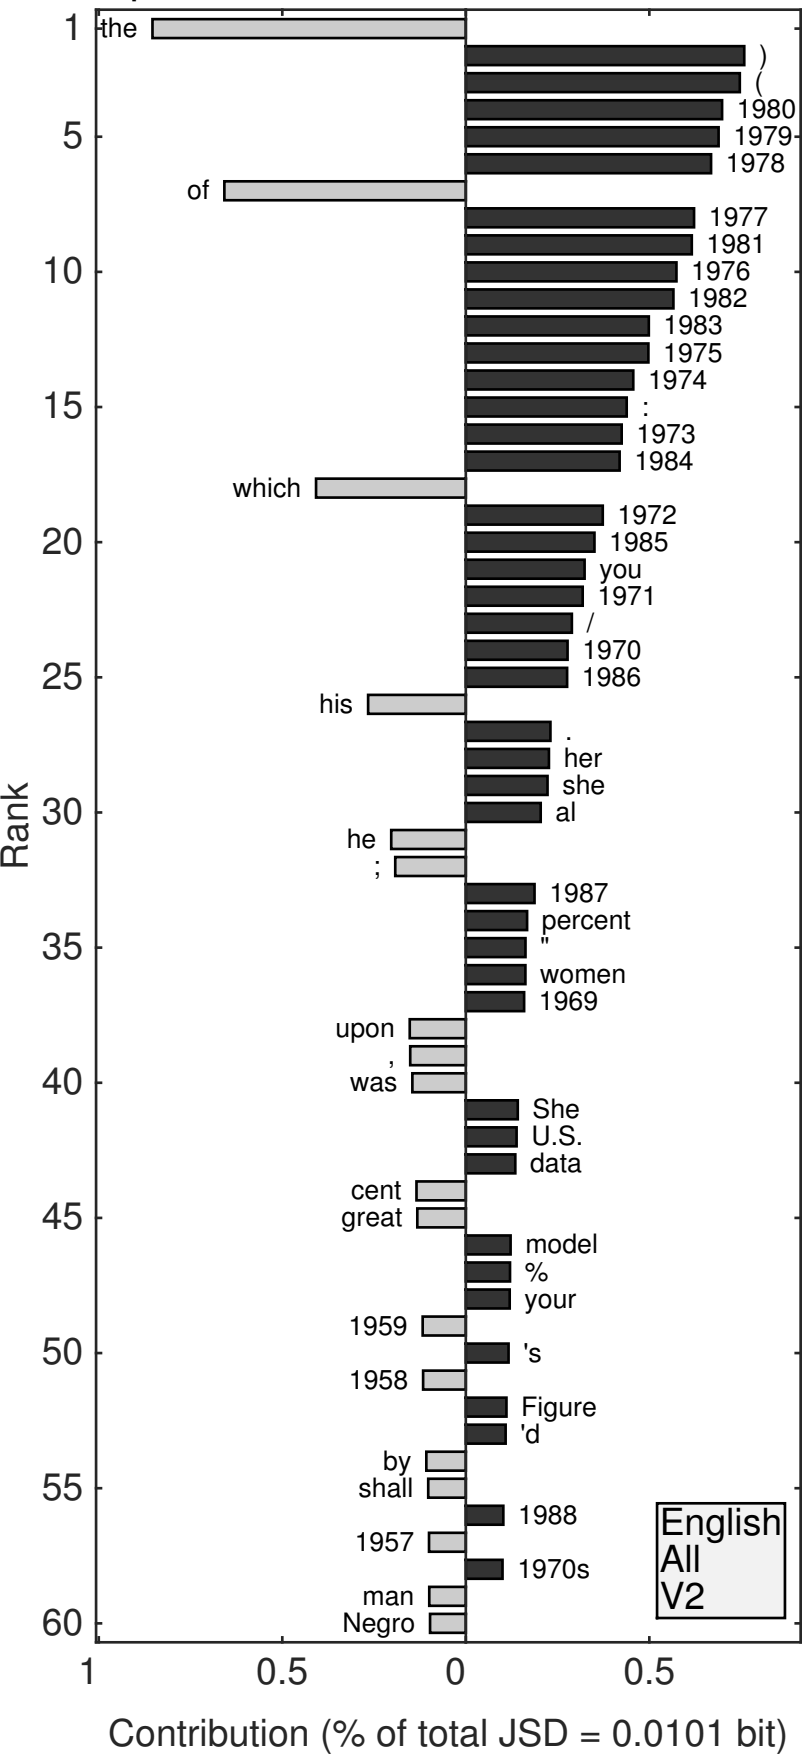

# Top JSD contributions: 1960s to 1990s

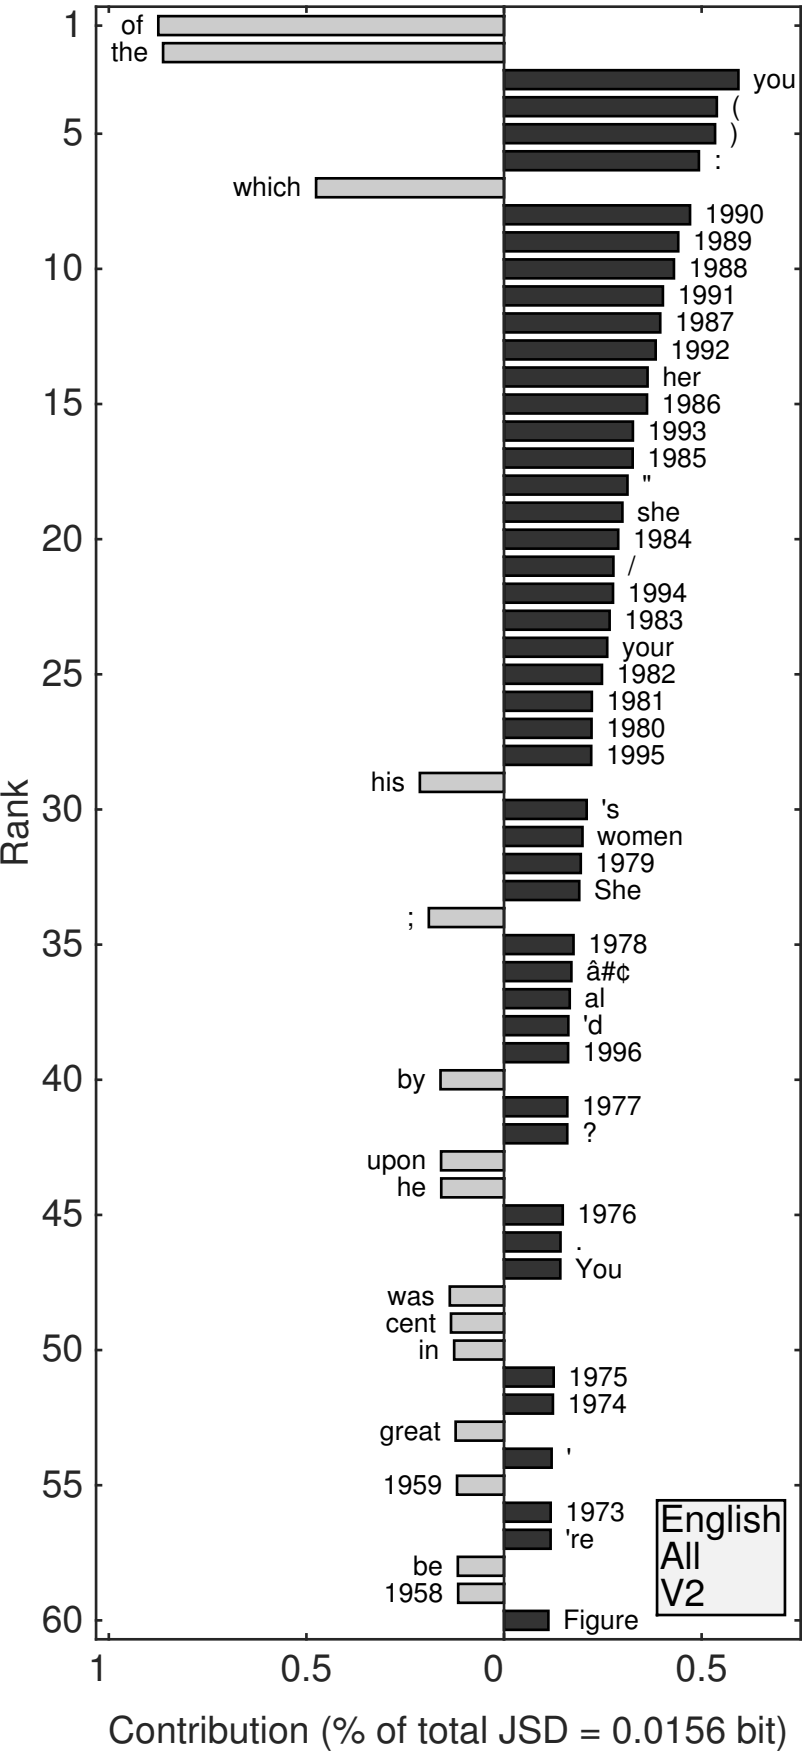

# Top JSD contributions: 1970s to 1980s

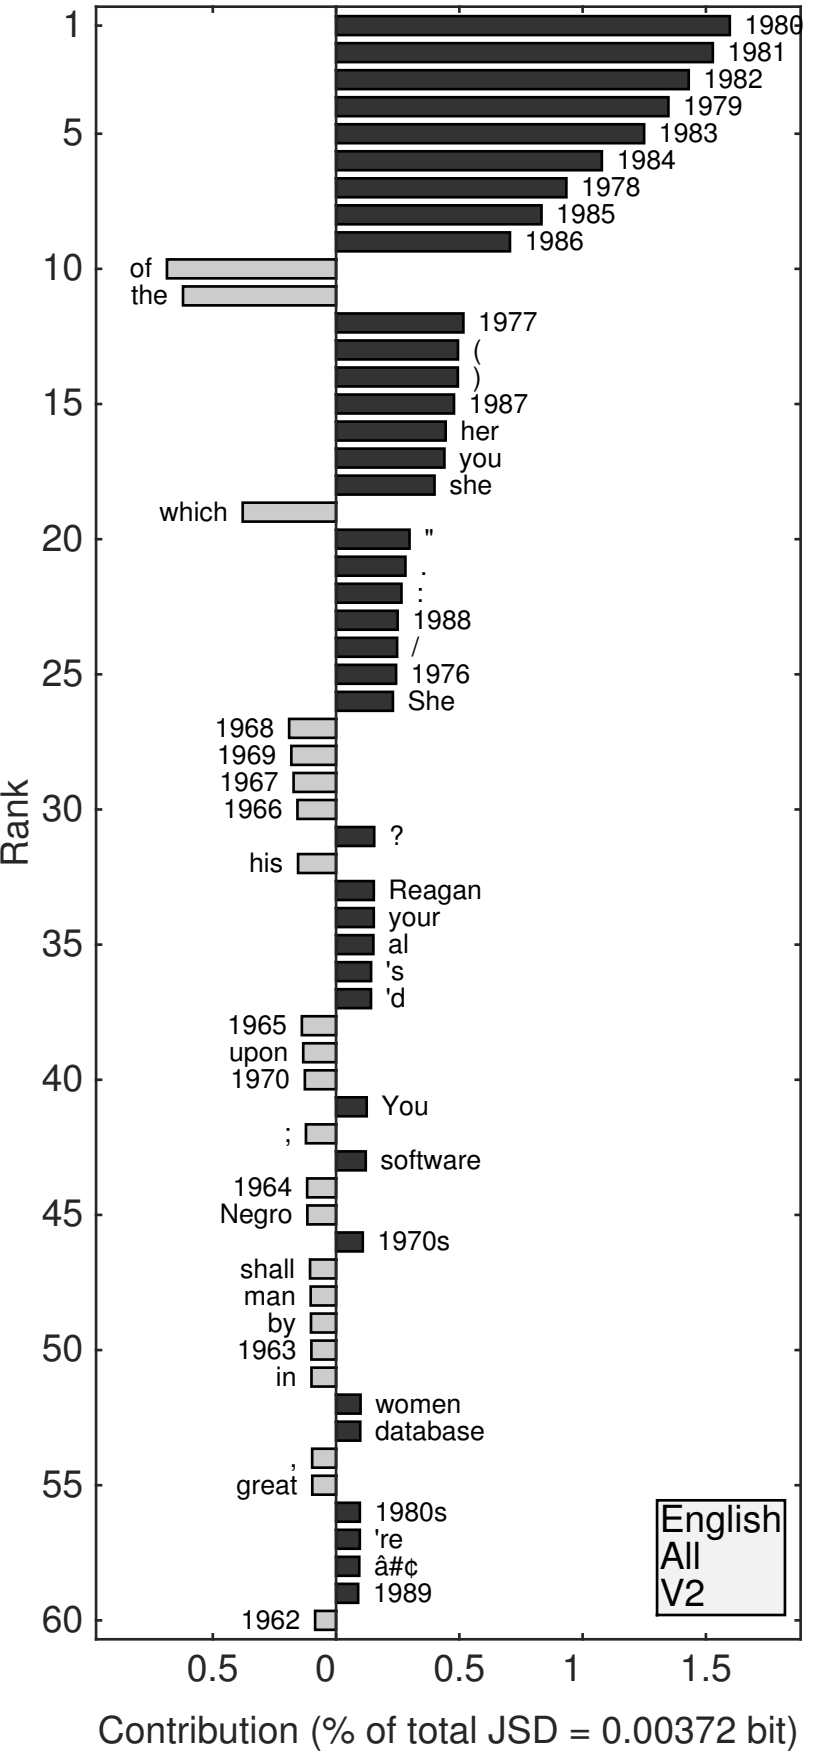

# Top JSD contributions: 1970s to 1990s

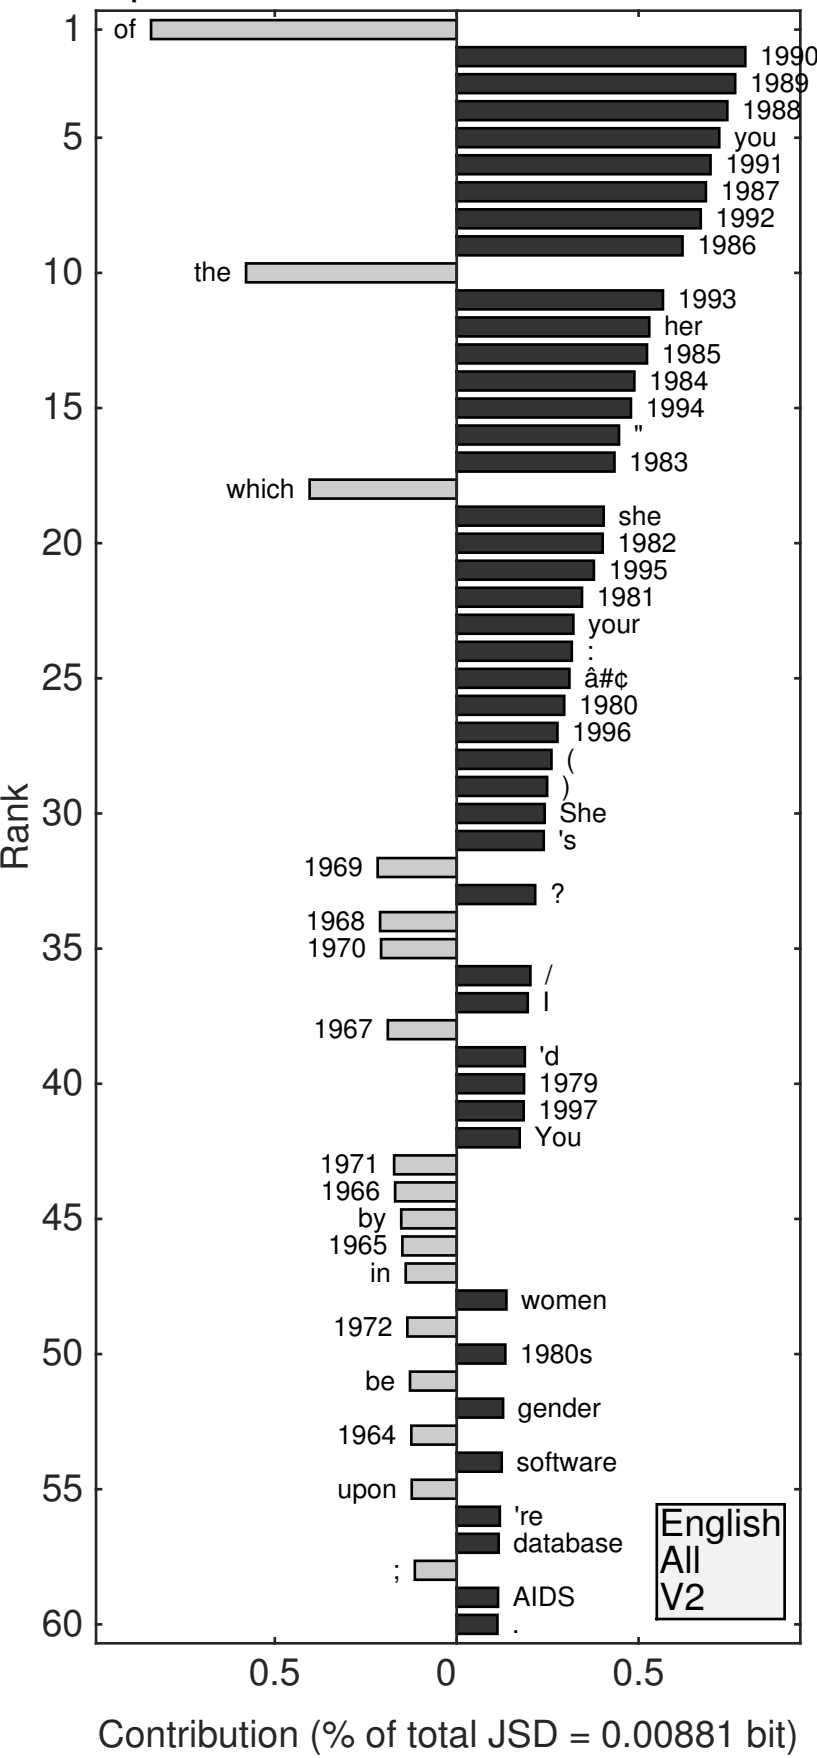

# Top JSD contributions: 1980s to 1990s

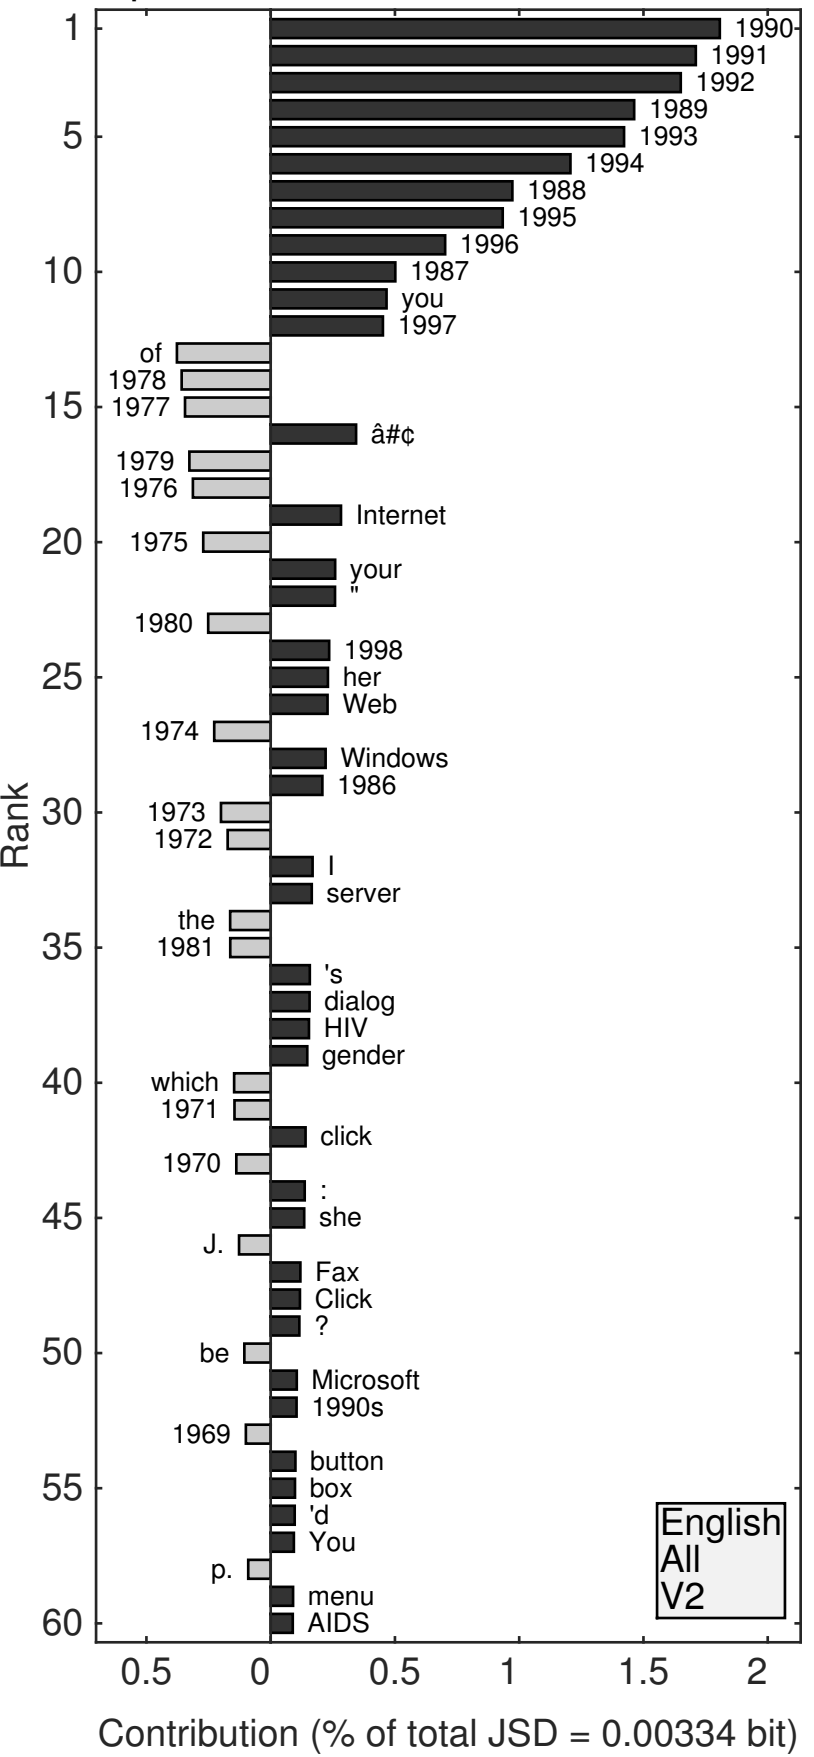

Supplement: pone.0137041.s001.pdf [file pone.0137041.s001.pdf]
