# Supplementary material for: Characterizing the Google Books Corpus: Strong Limits to Inferences of Socio-Cultural and Linguistic Evolution
Source: PubMed Central journal article supplement (PMC4596490; doi:10.1371/journal.pone.0137041), 2015-10-07

# Top JSD contributions: 1800s to 1810s

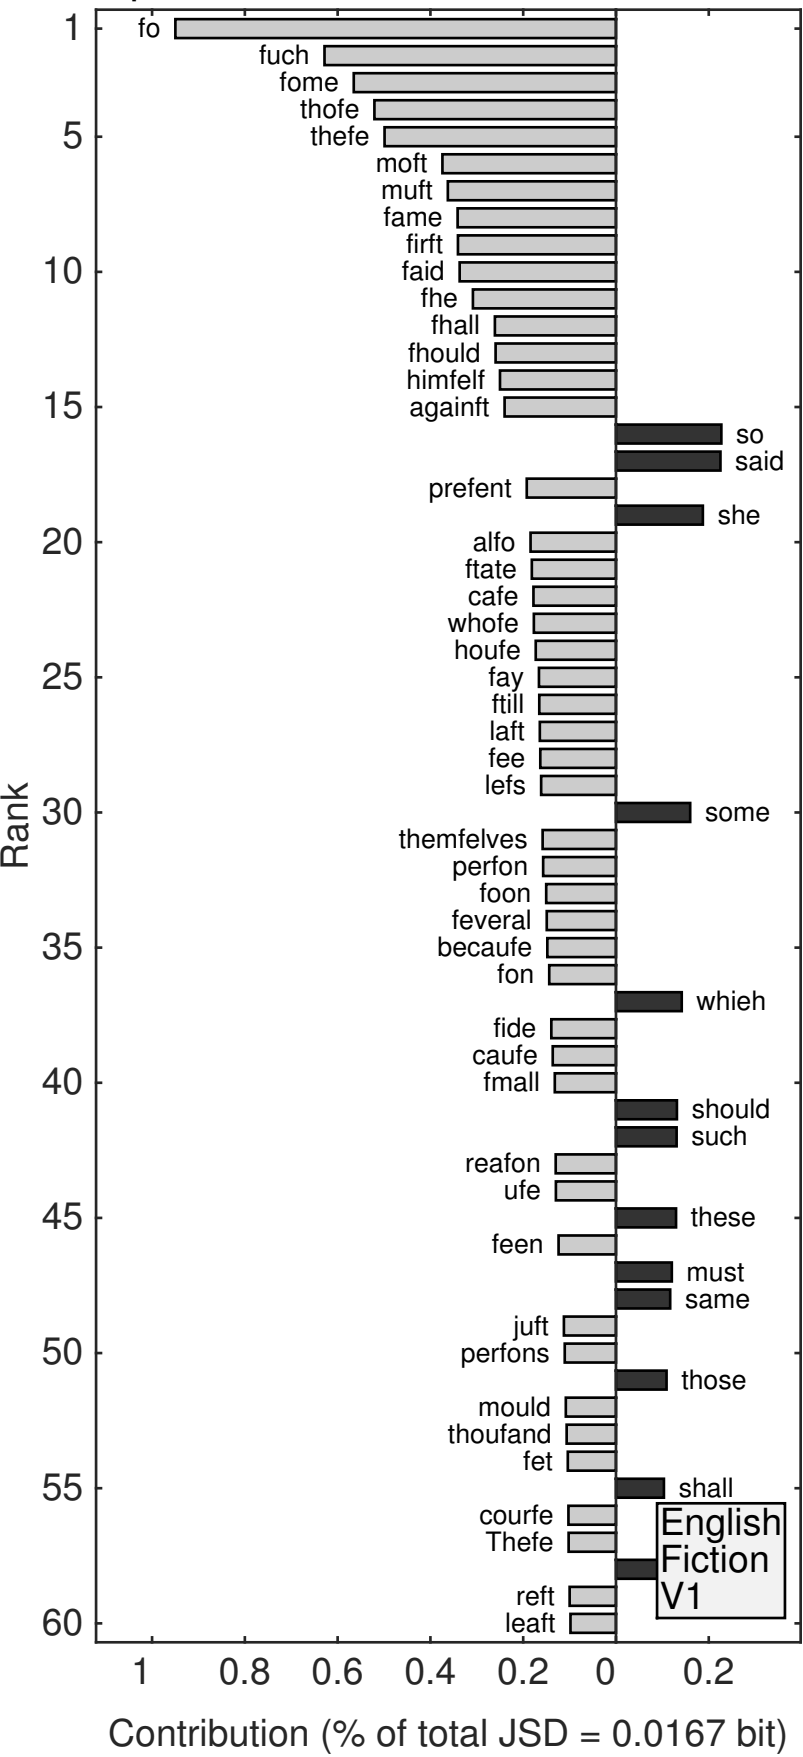

# Top JSD contributions: 1800s to 1820s

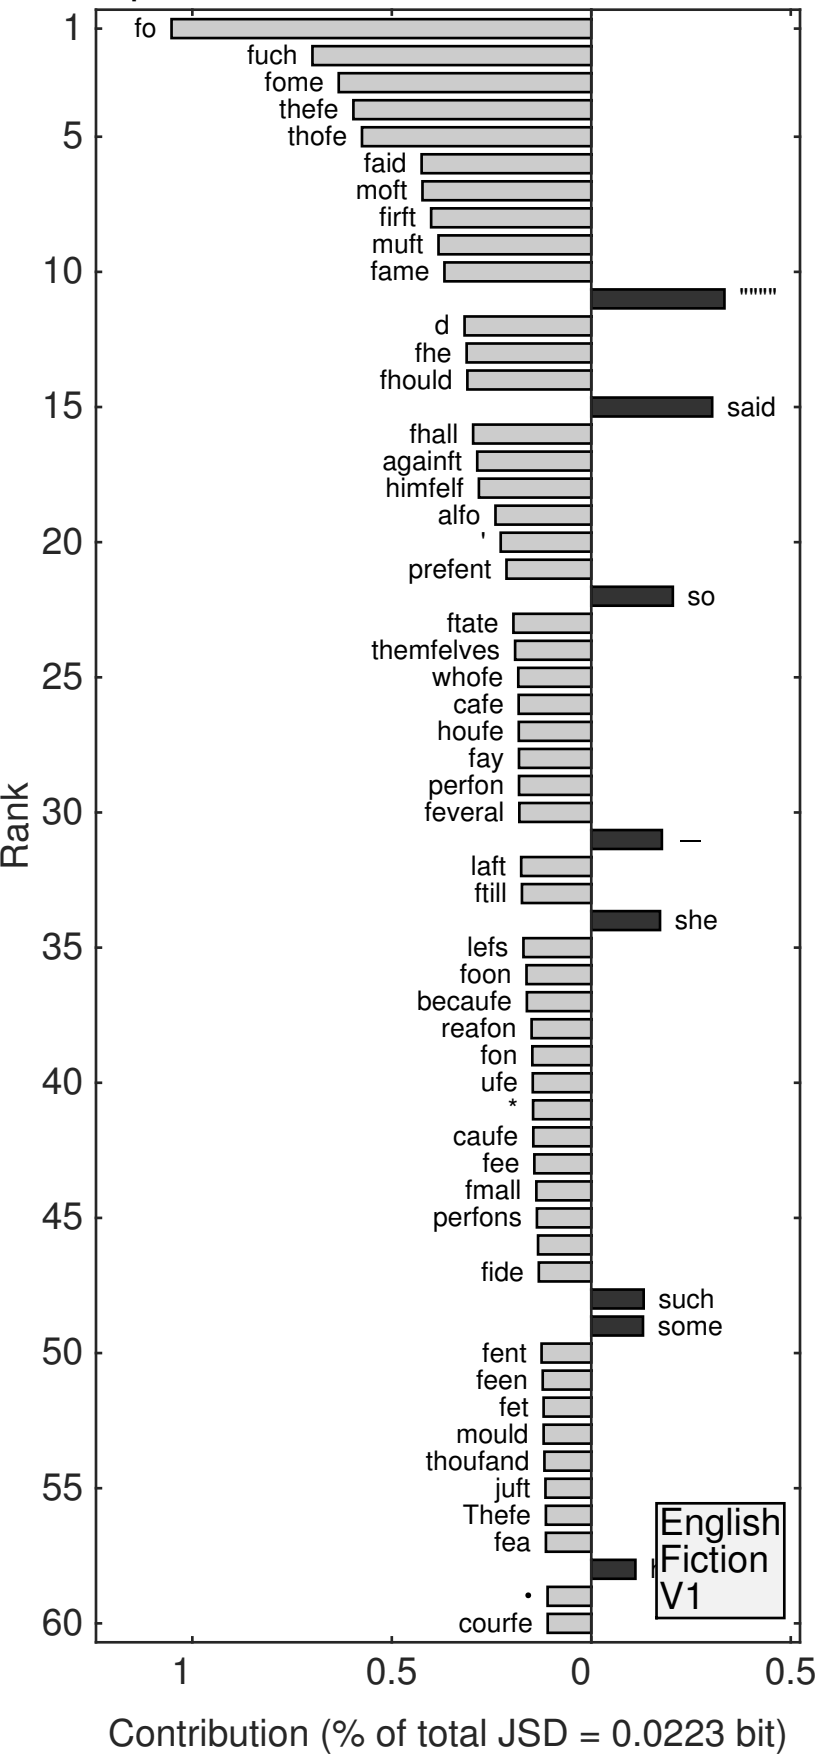

# Top JSD contributions: 1800s to 1830s

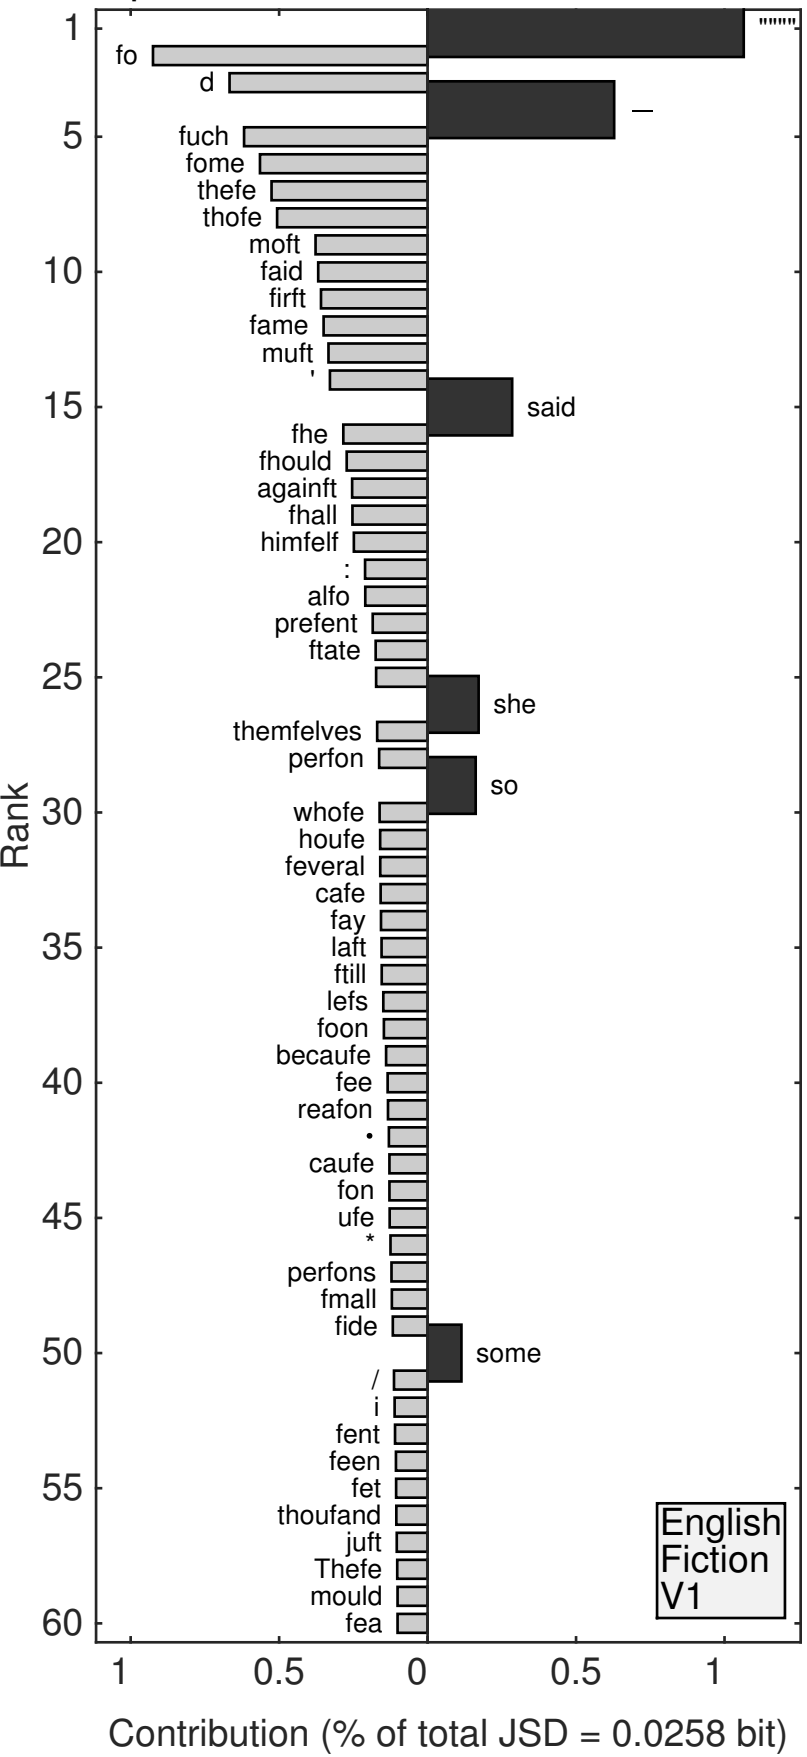

# Top JSD contributions: 1800s to 1840s

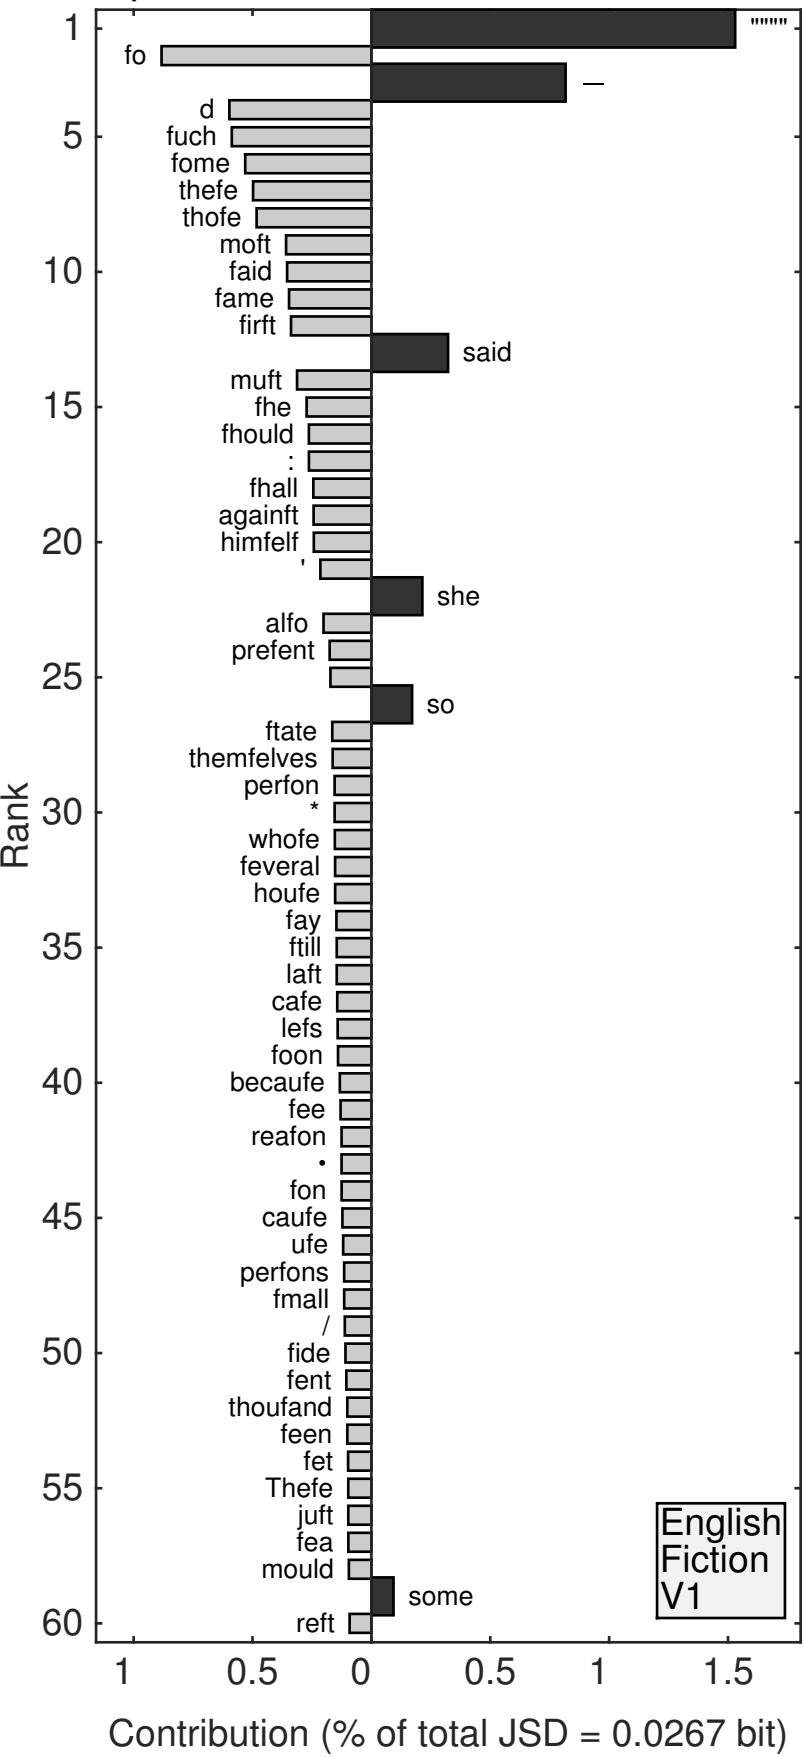

English Fiction V1

# Top JSD contributions: 1800s to 1850s

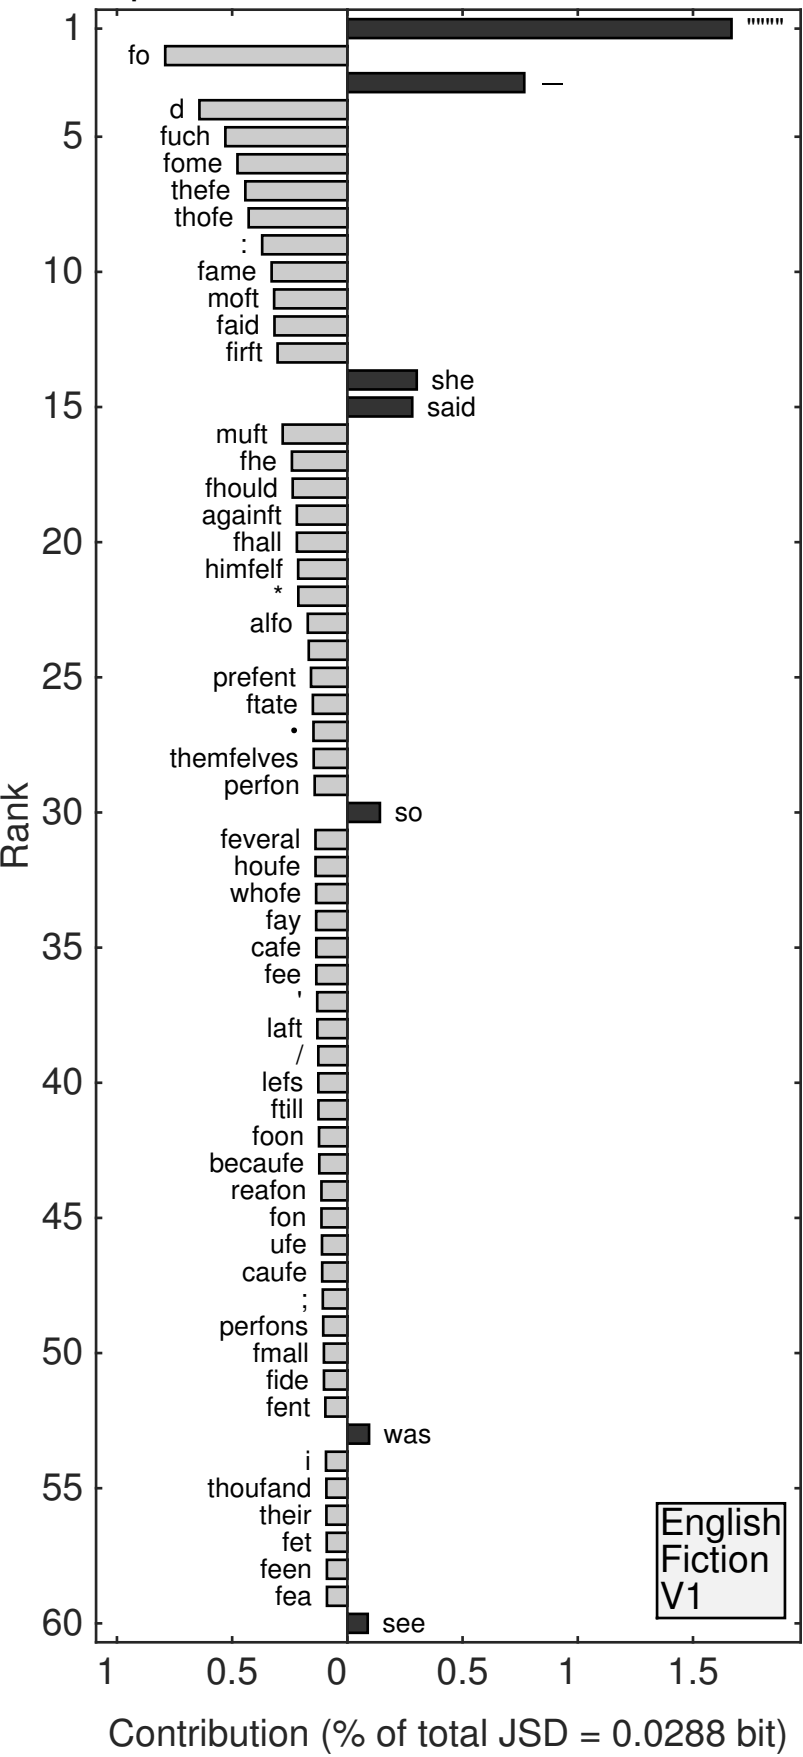

# Top JSD contributions: 1800s to 1860s

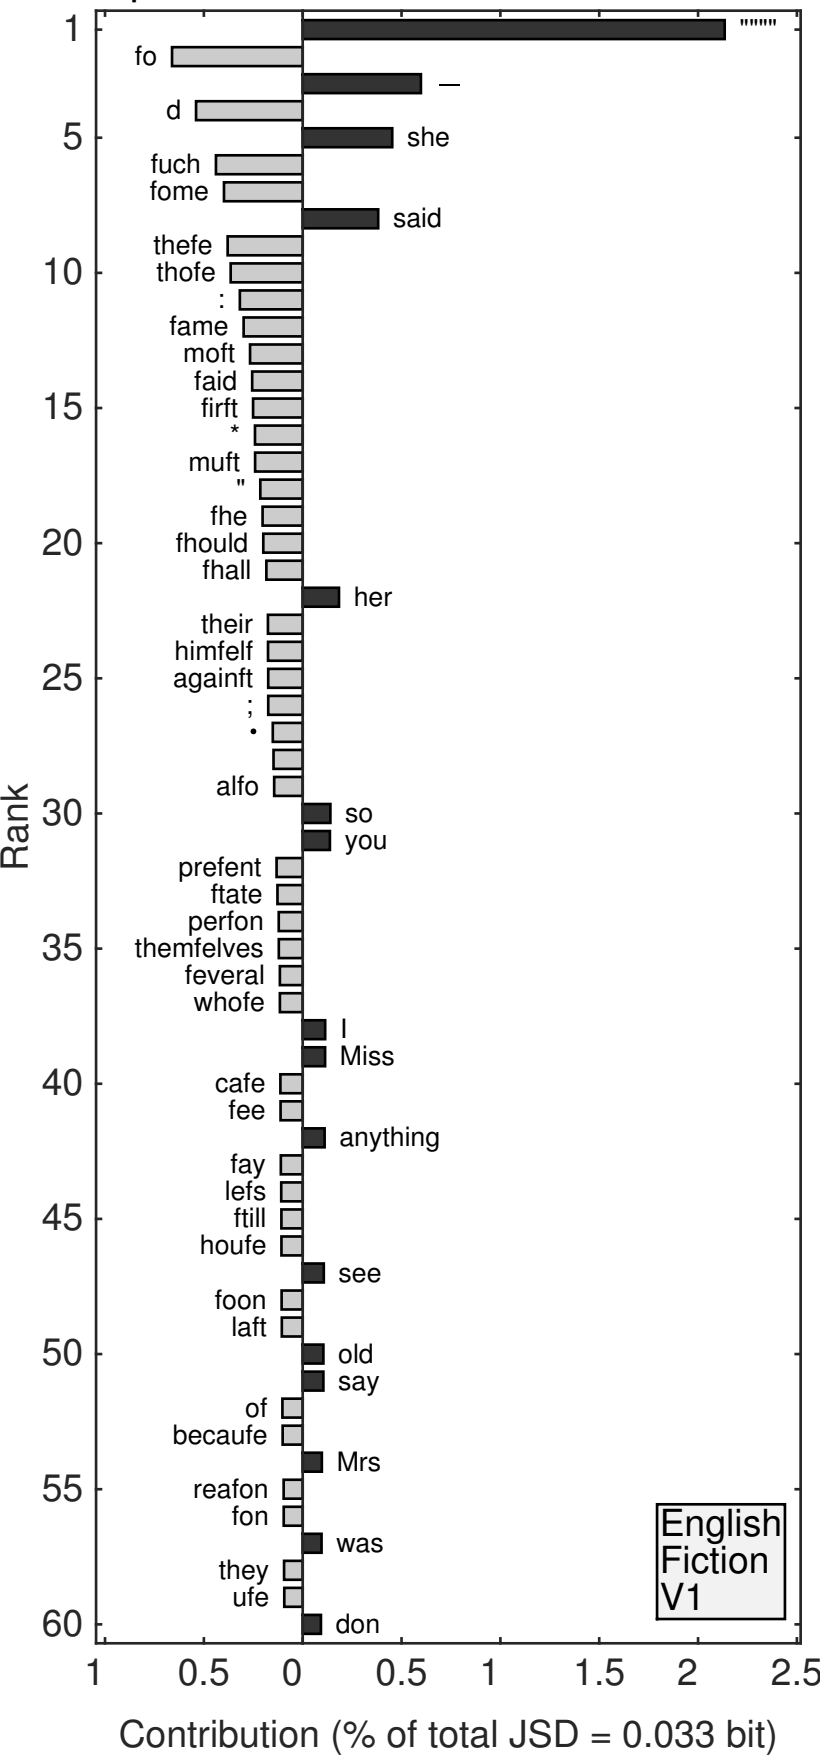

# Top JSD contributions: 1800s to 1870s

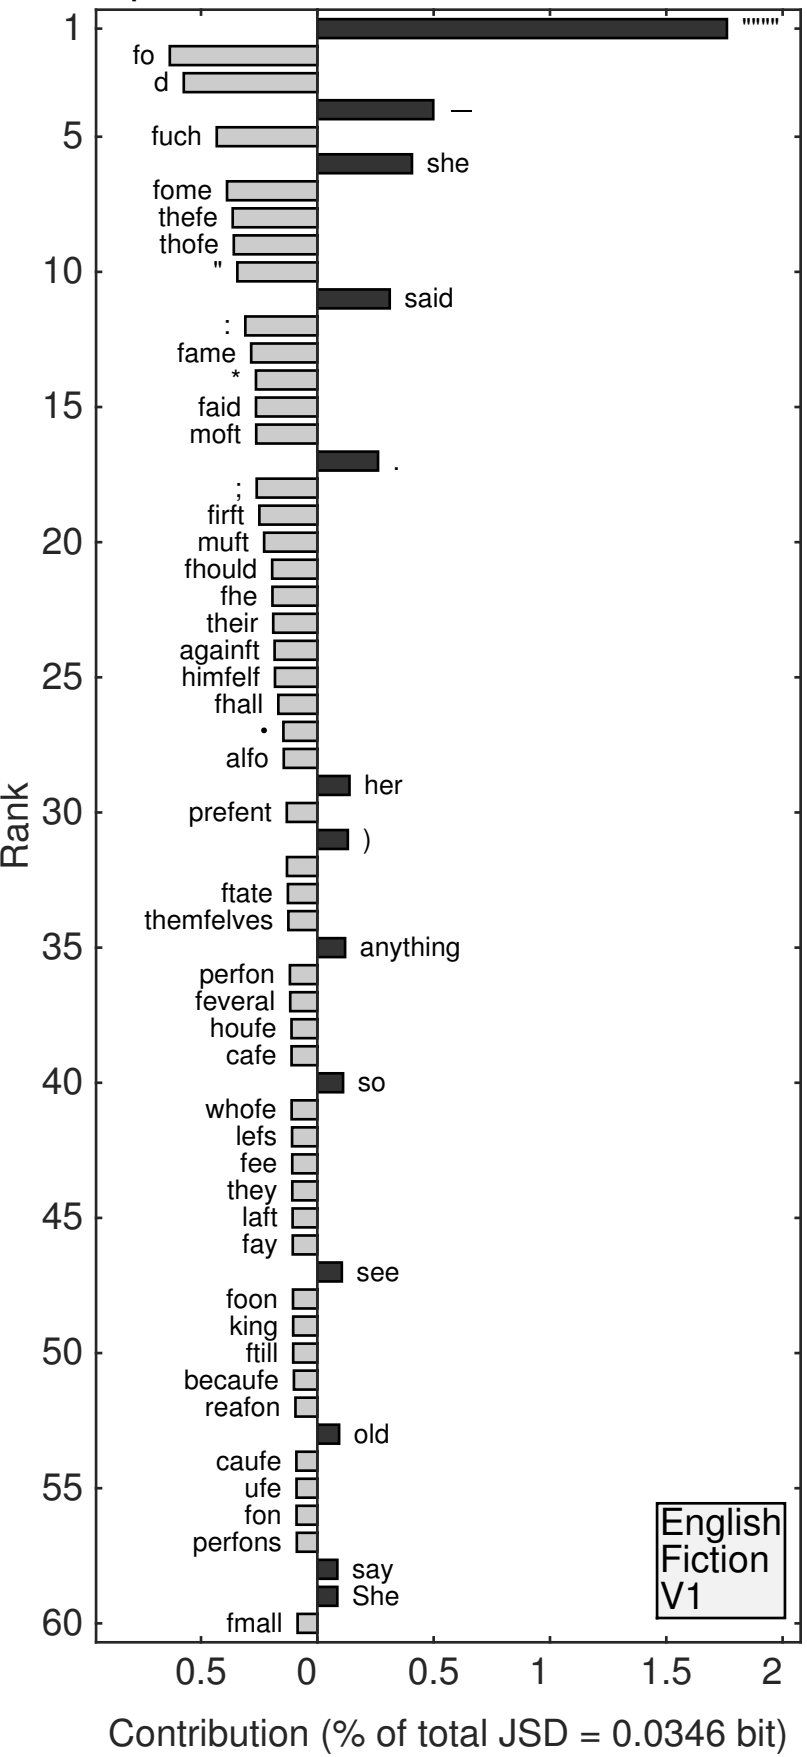

# Top JSD contributions: 1800s to 1880s

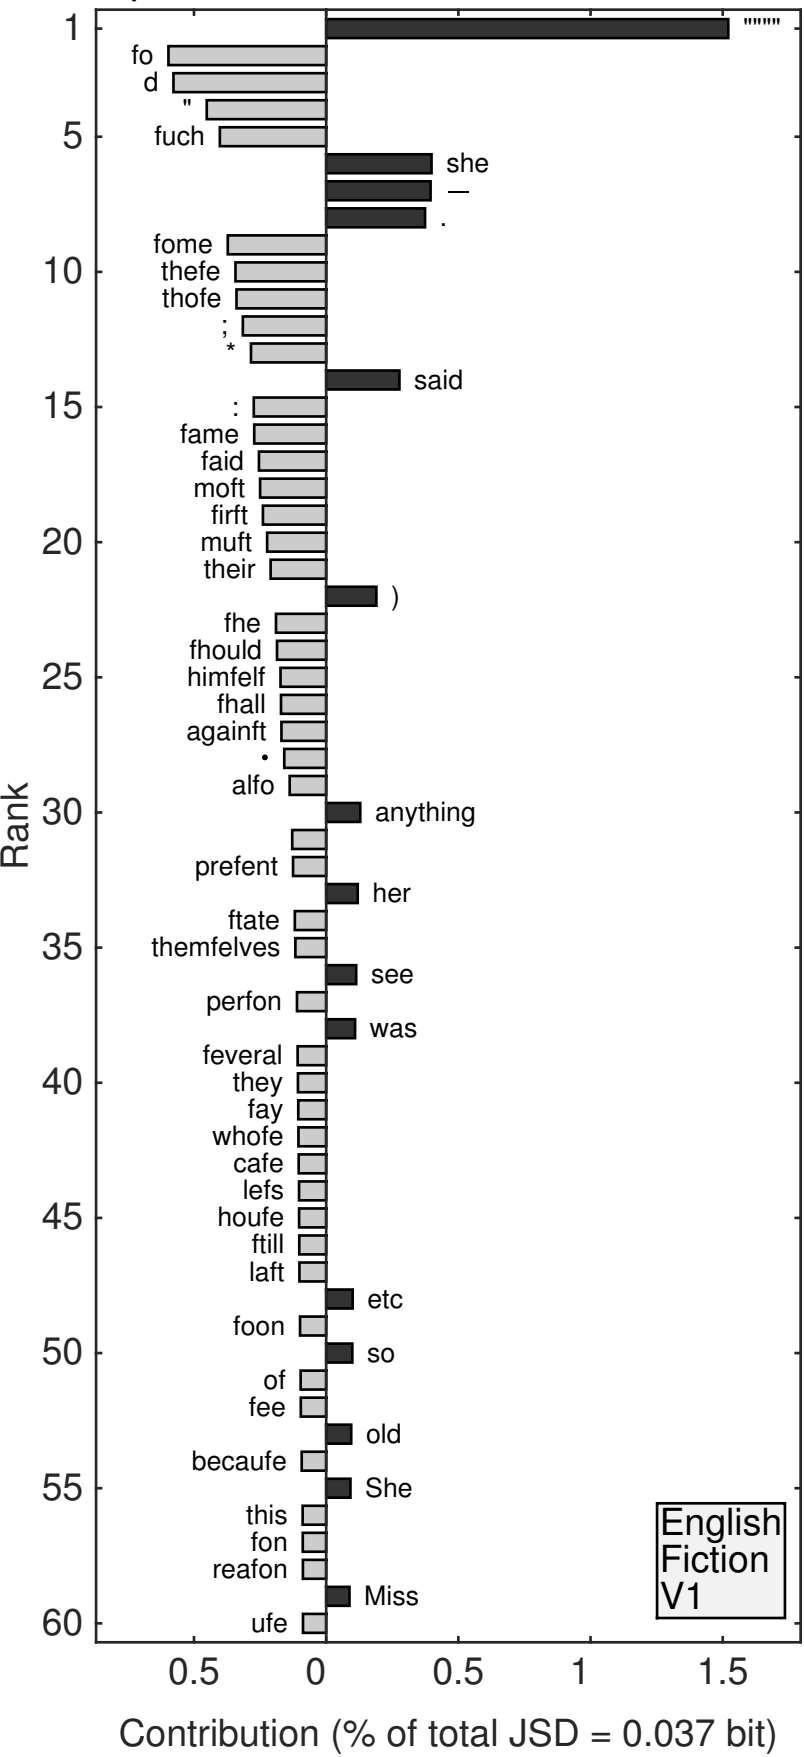



# Top JSD contributions: 1800s to 1890s

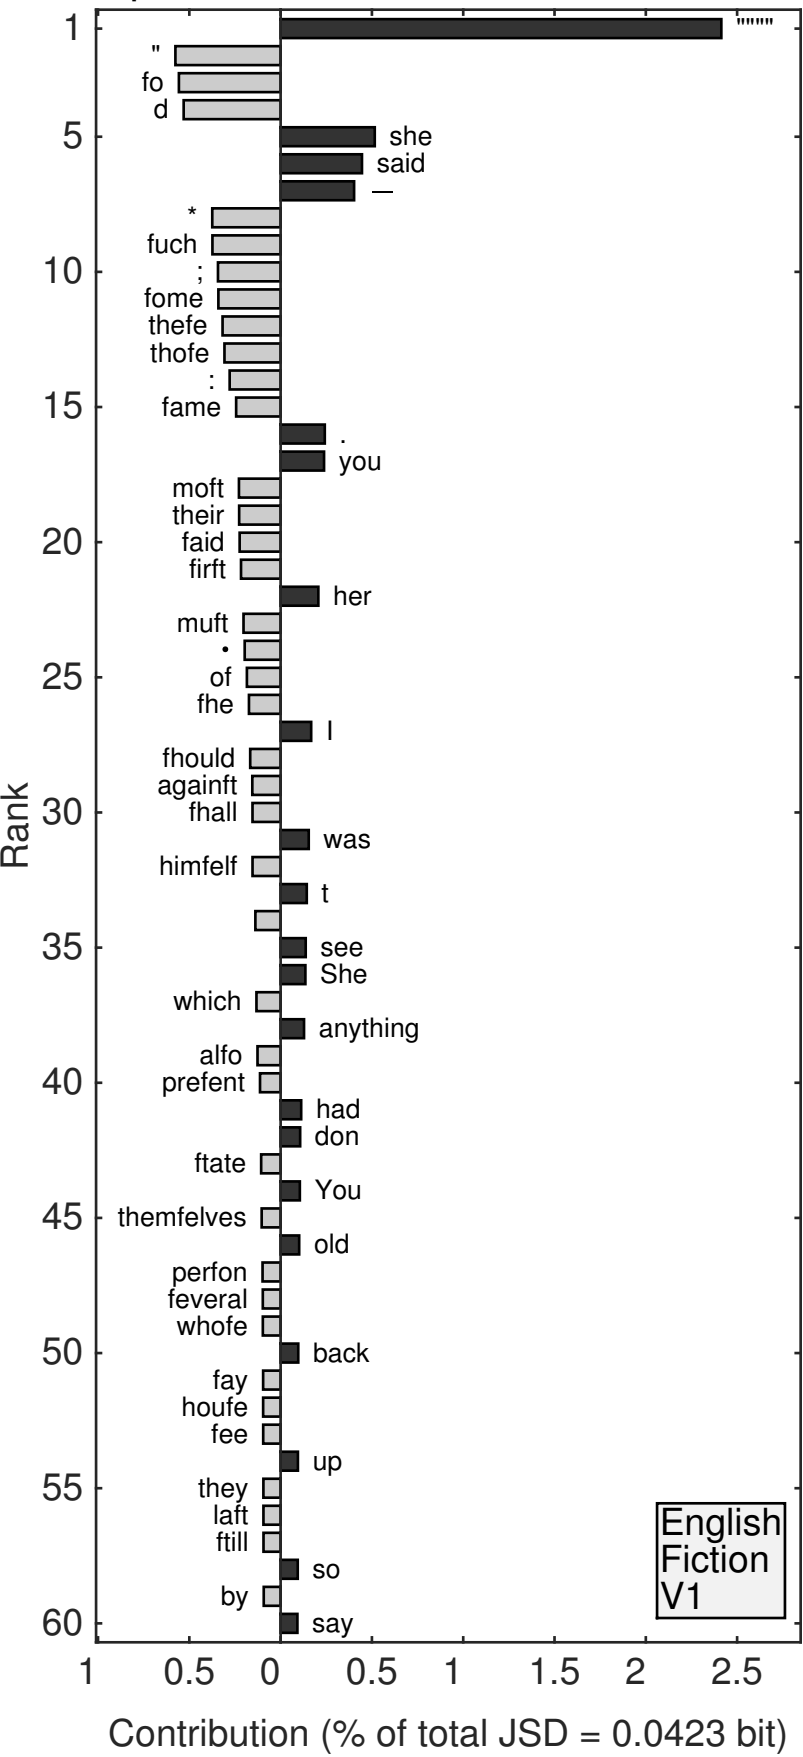

English Fiction V1

# Top JSD contributions: 1800s to 1900s

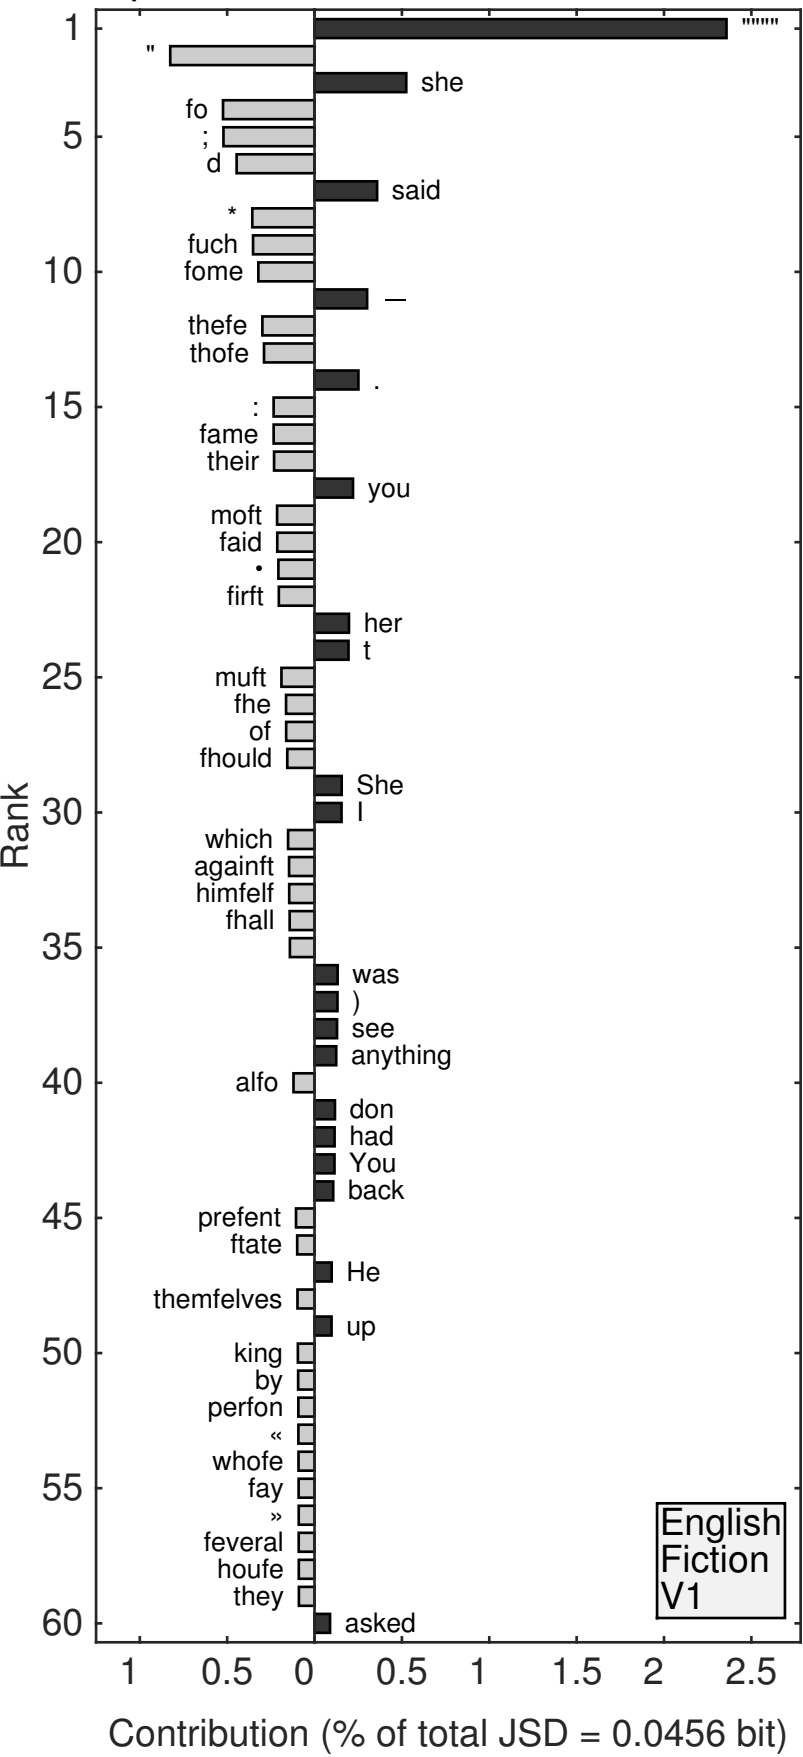

English Fiction V1

# Top JSD contributions: 1800s to 1910s

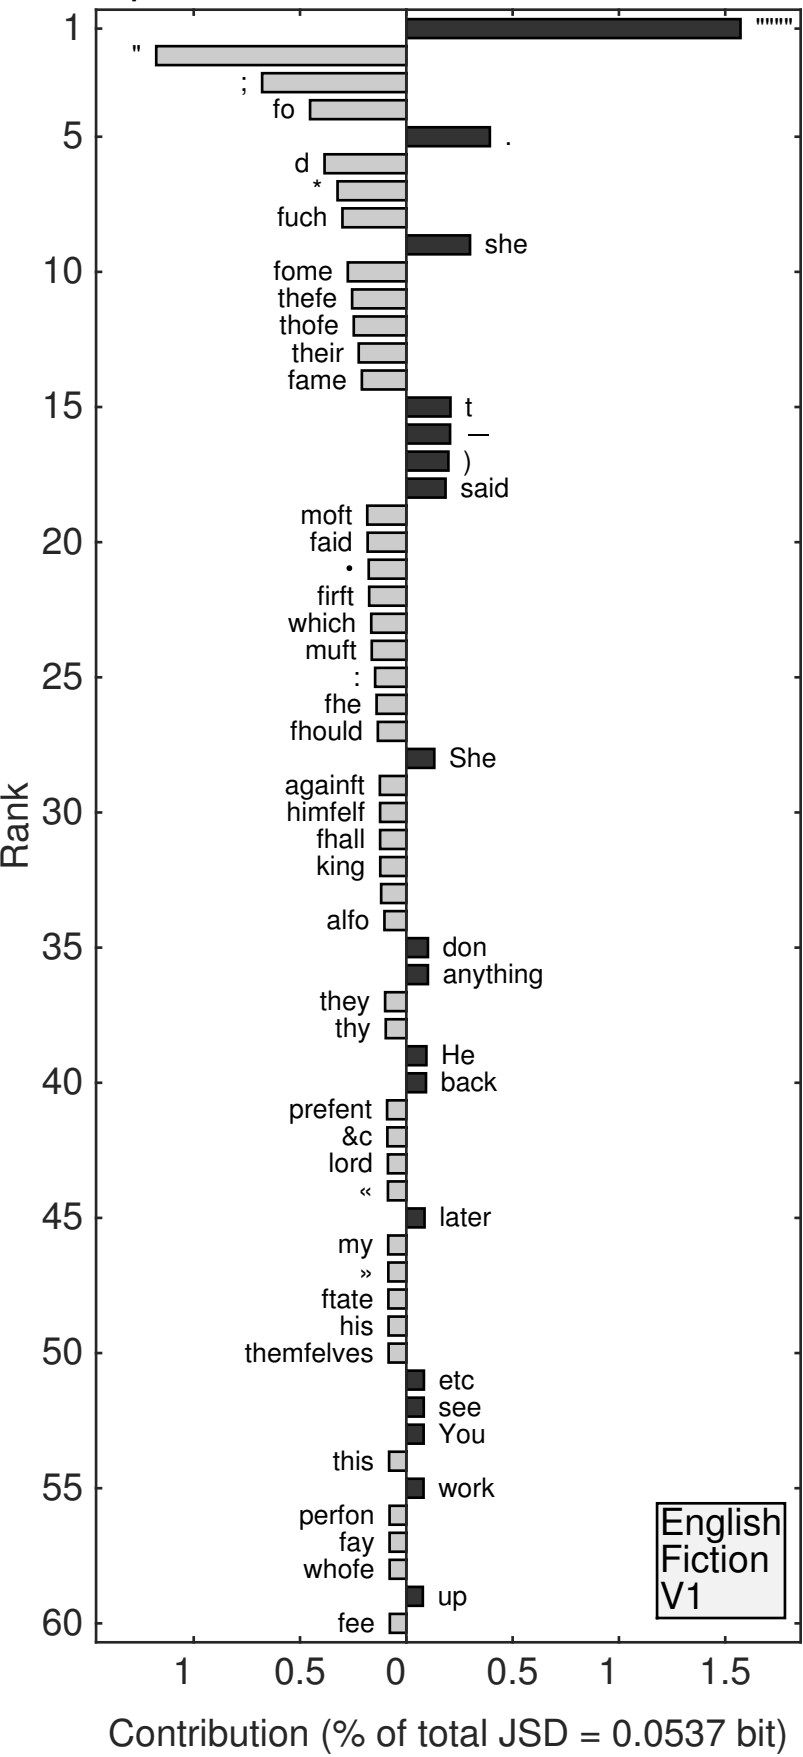

# Top JSD contributions: 1800s to 1920s

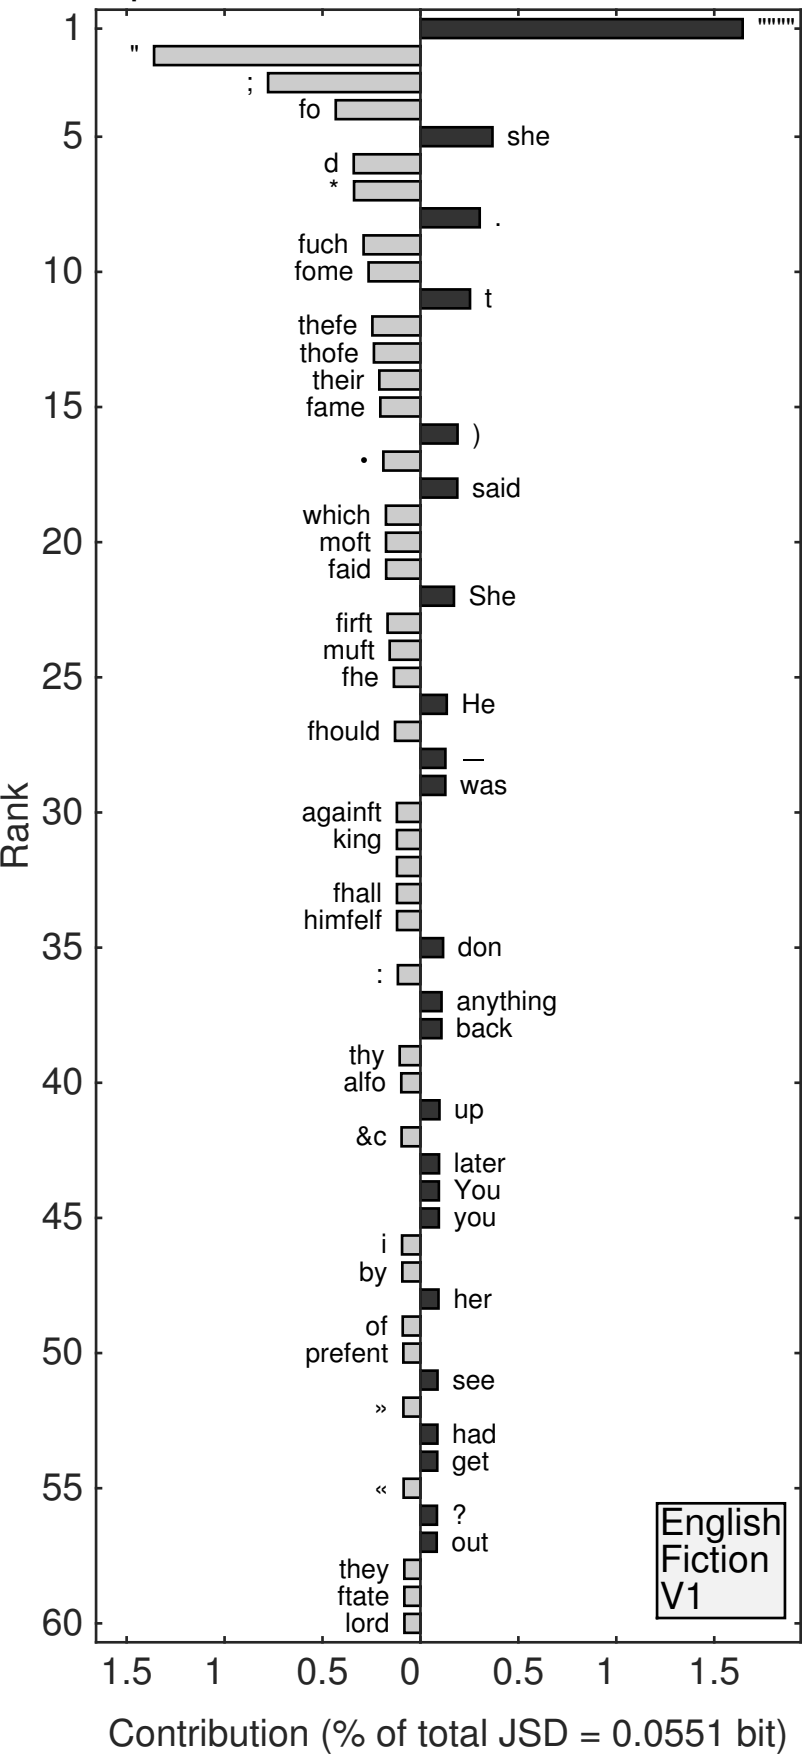

# Top JSD contributions: 1800s to 1930s

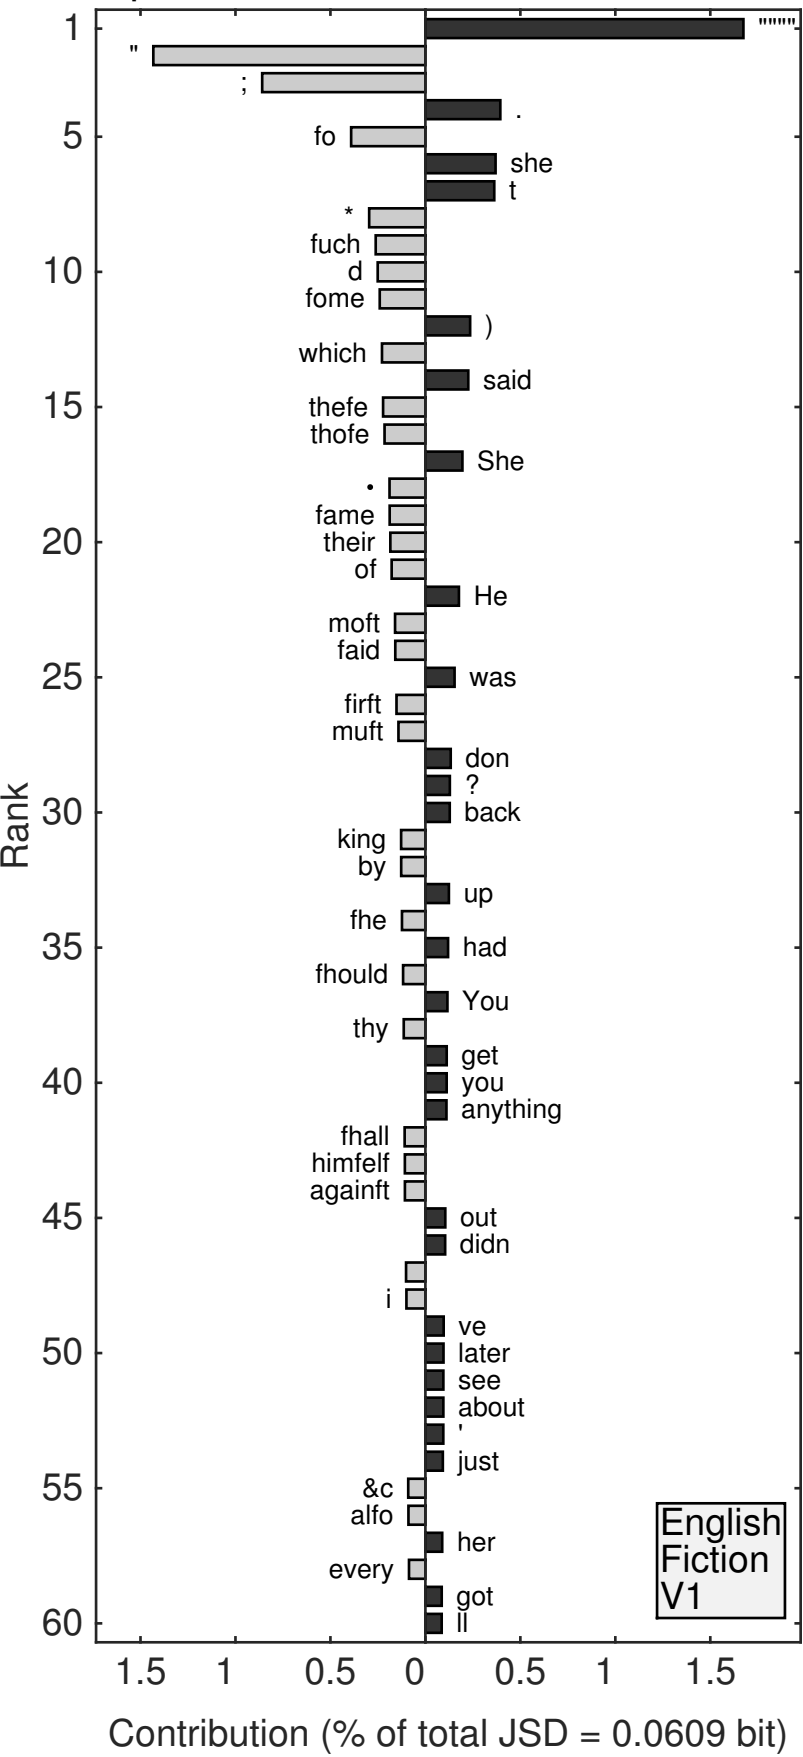

# Top JSD contributions: 1800s to 1940s

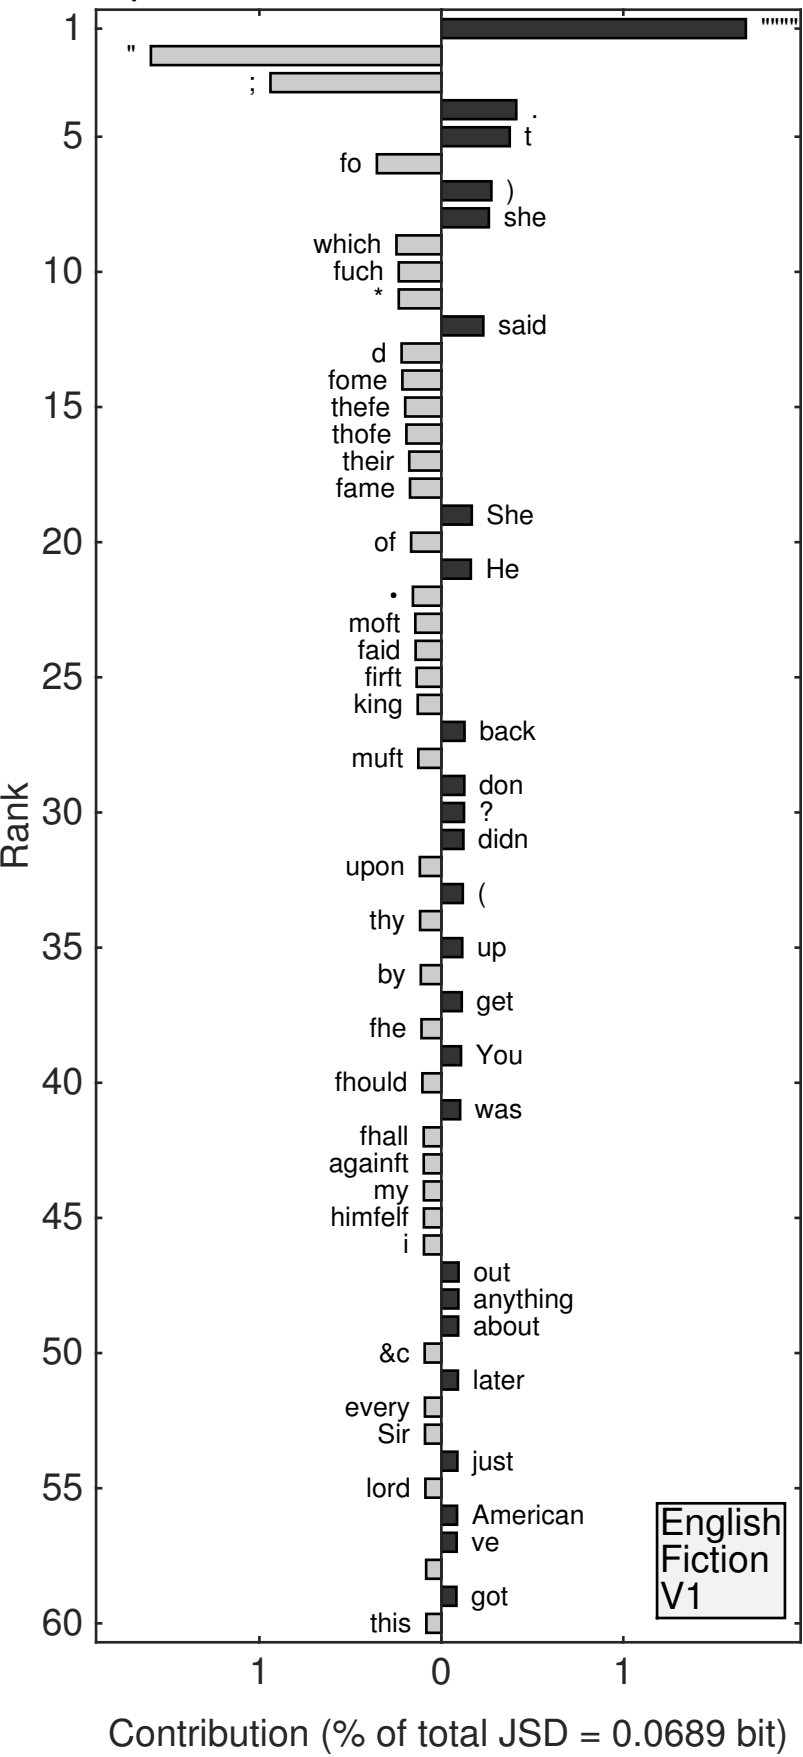

English Fiction V1

# Top JSD contributions: 1800s to 1950s

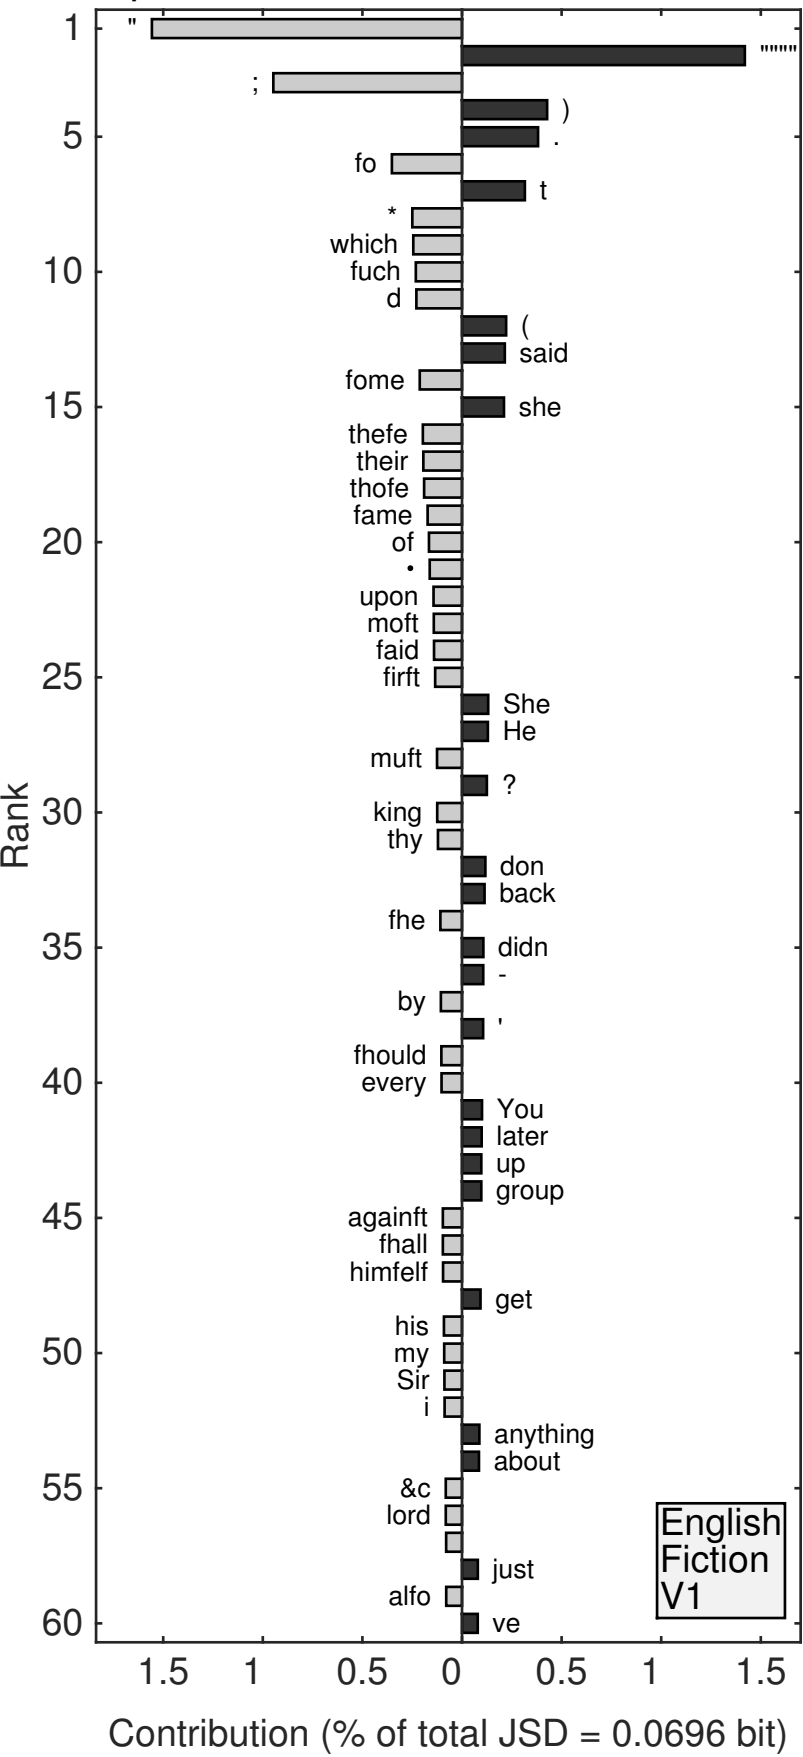

# Top JSD contributions: 1800s to 1960s

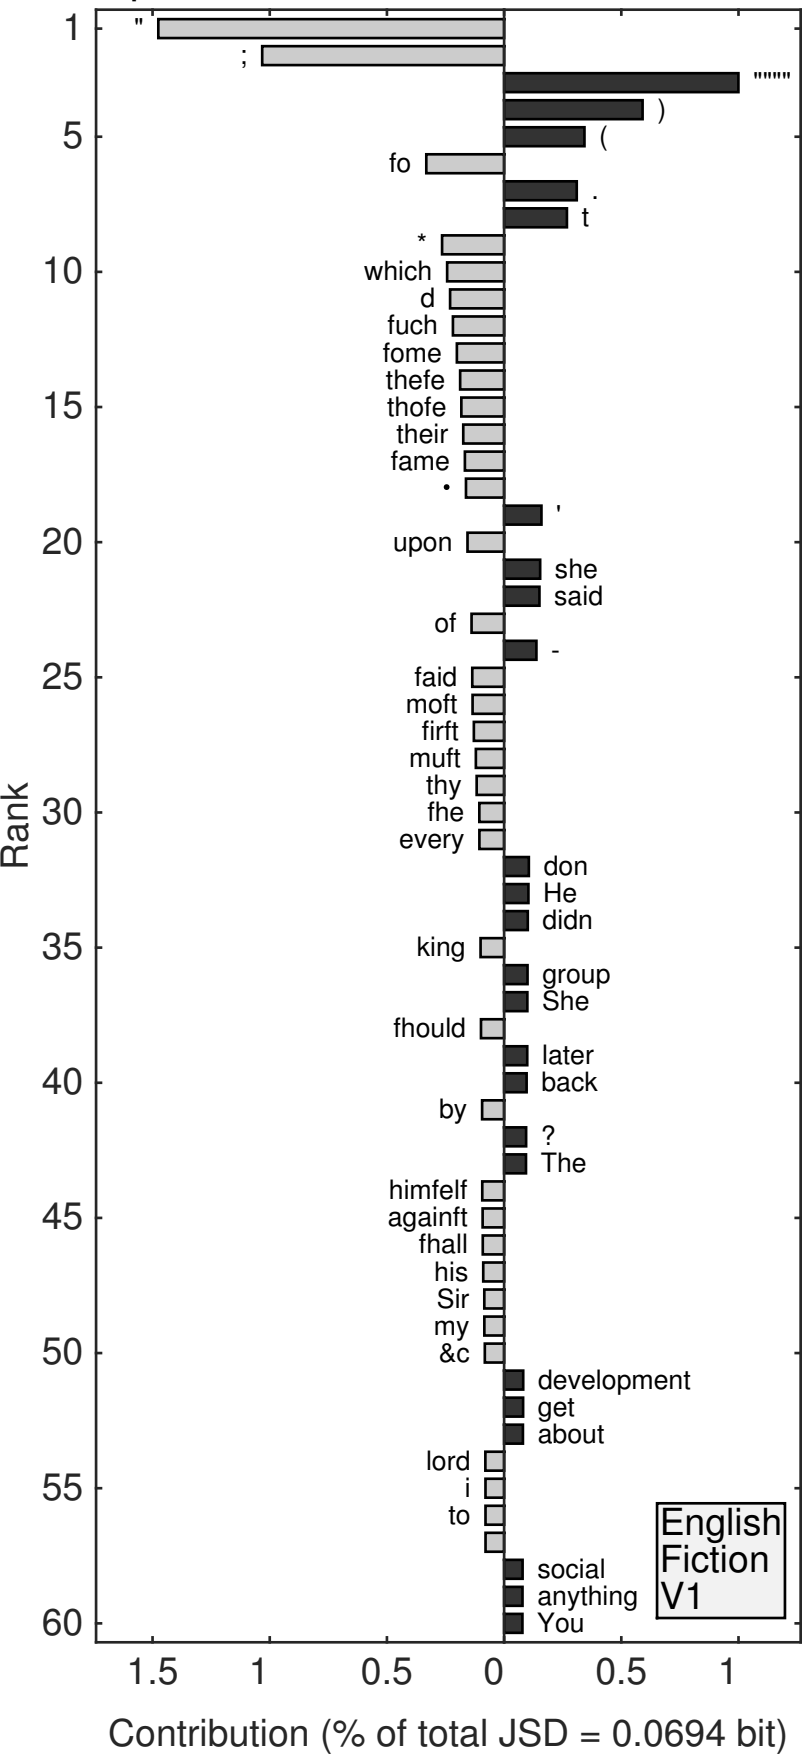



# Top JSD contributions: 1800s to 1970s

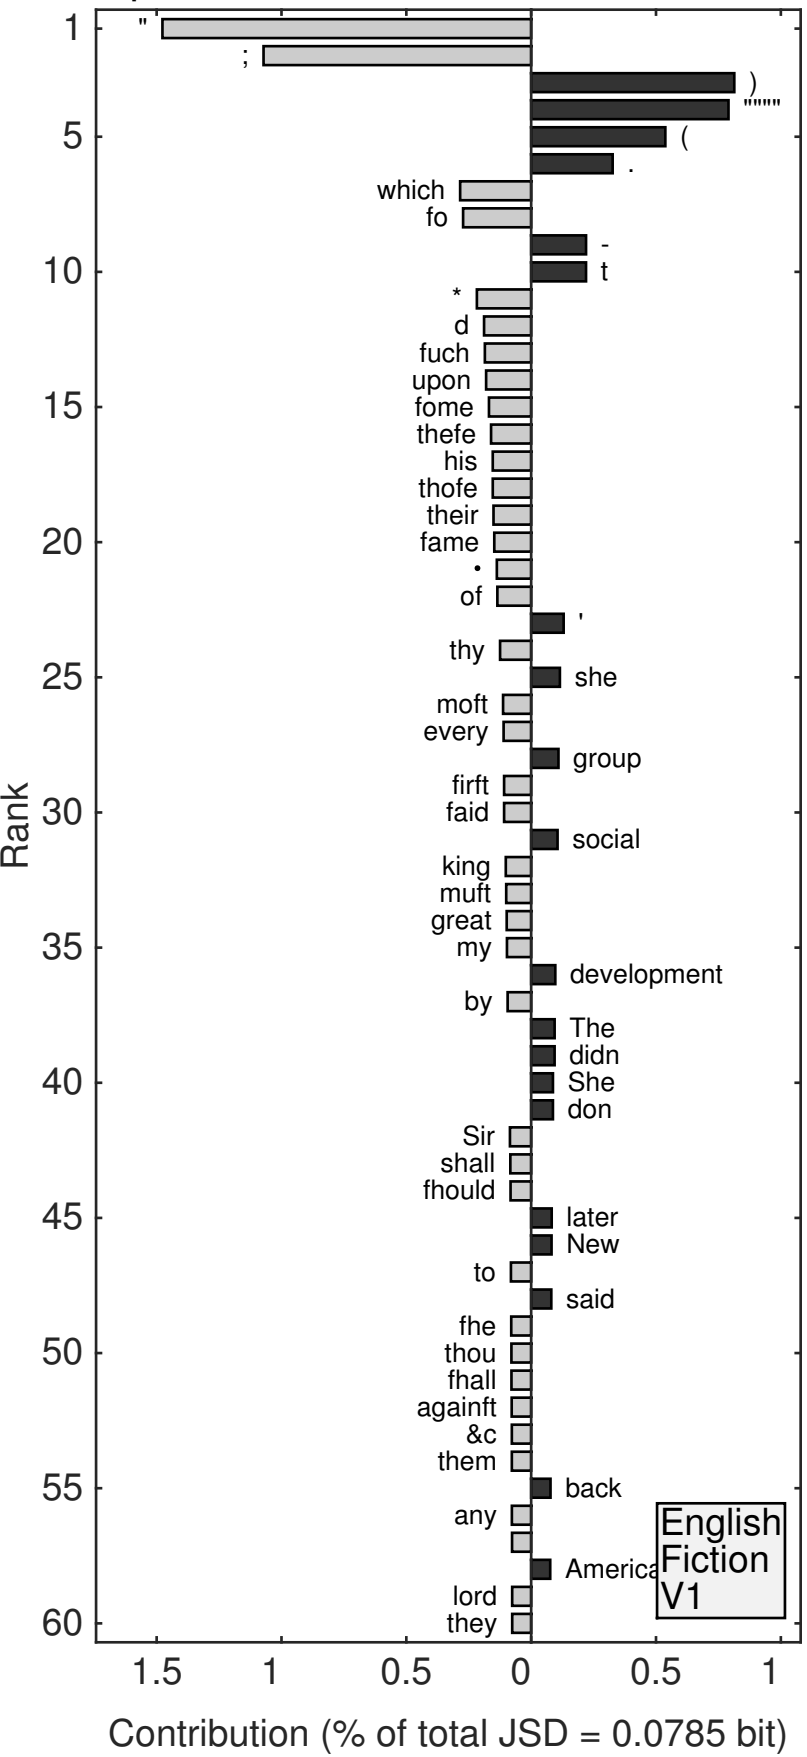

# Top JSD contributions: 1800s to 1980s

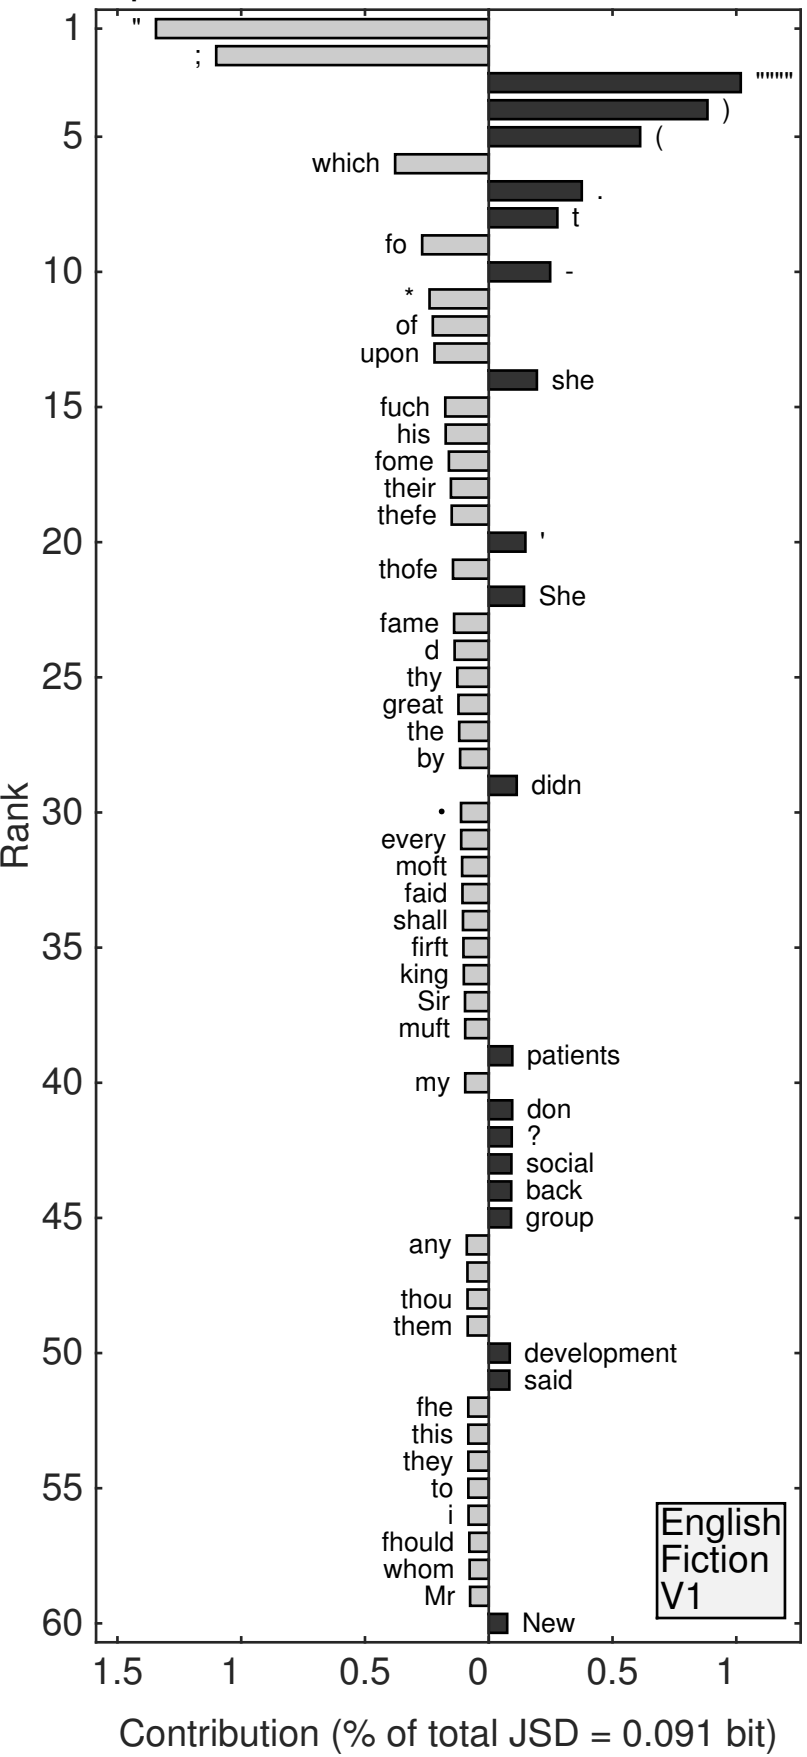

# Top JSD contributions: 1800s to 1990s

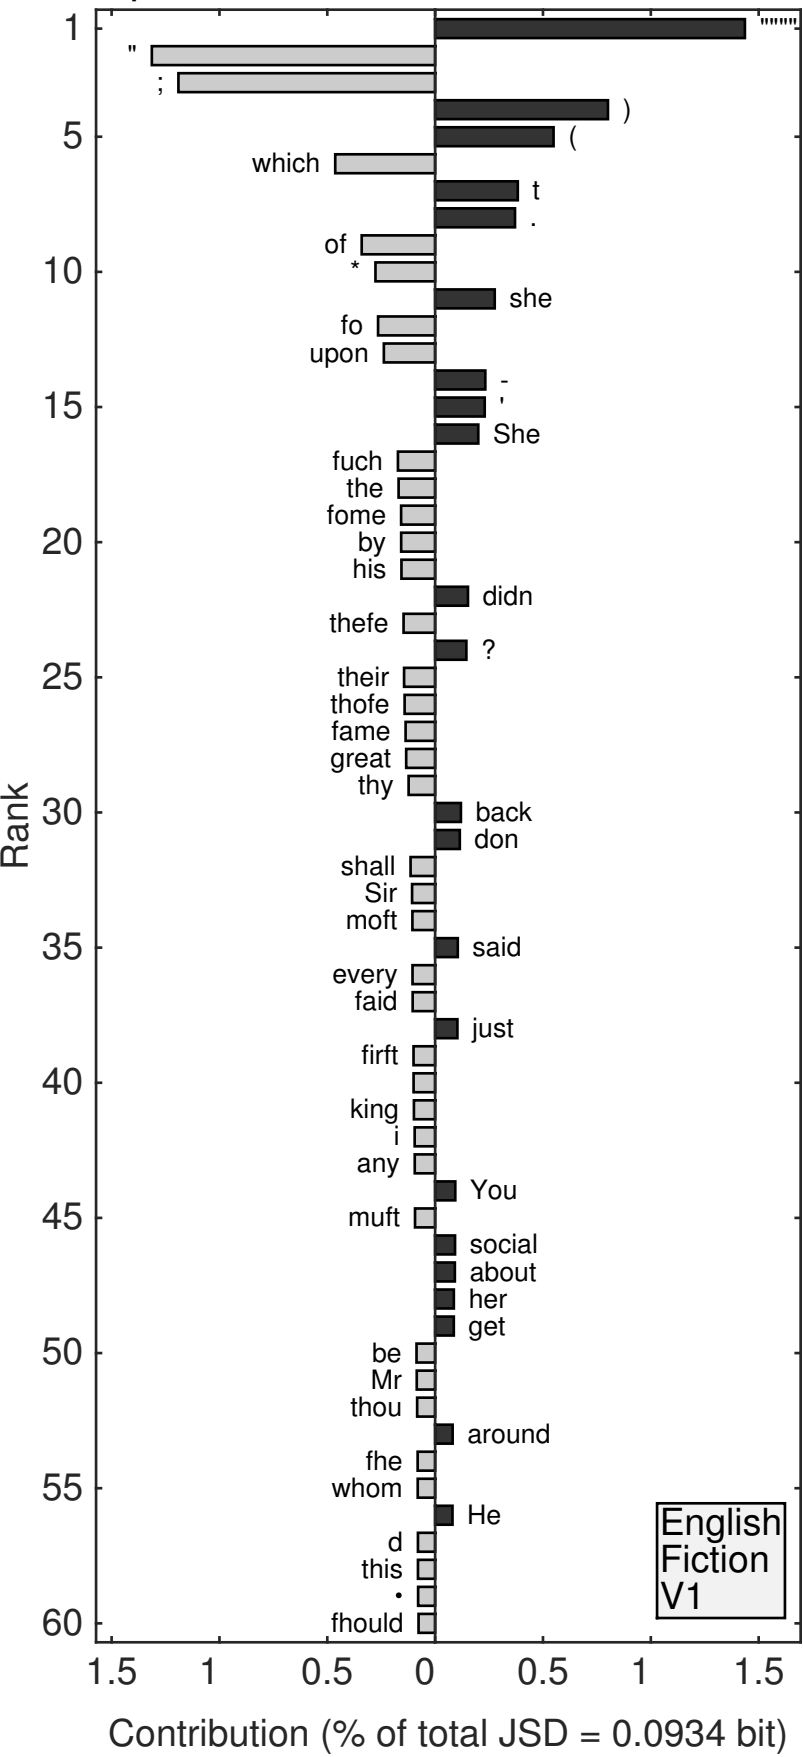

# Top JSD contributions: 1810s to 1820s

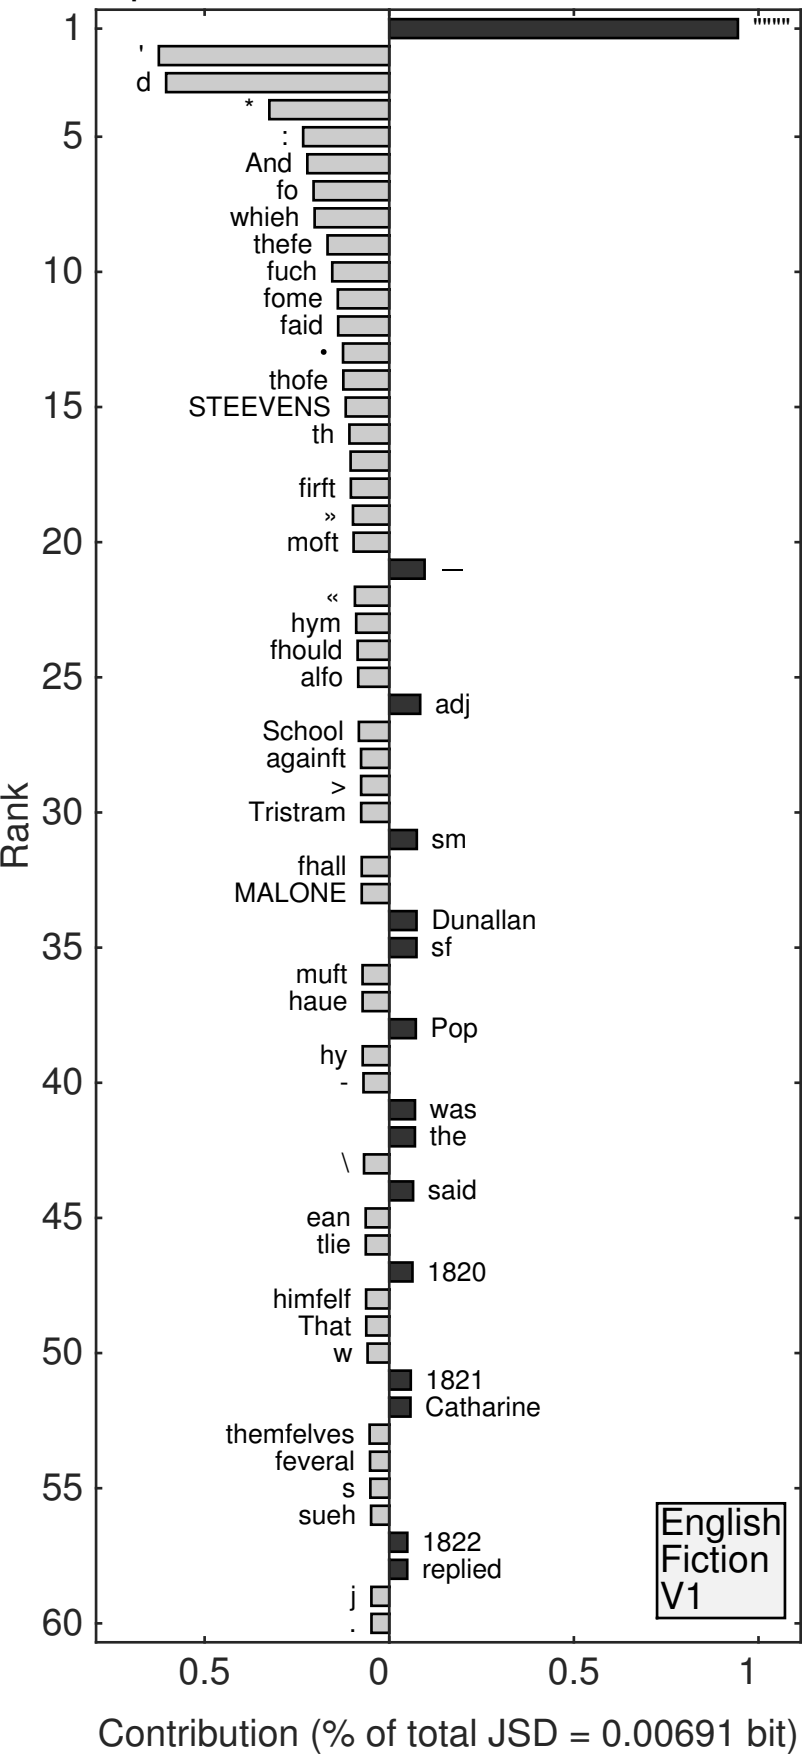

# Top JSD contributions: 1810s to 1830s

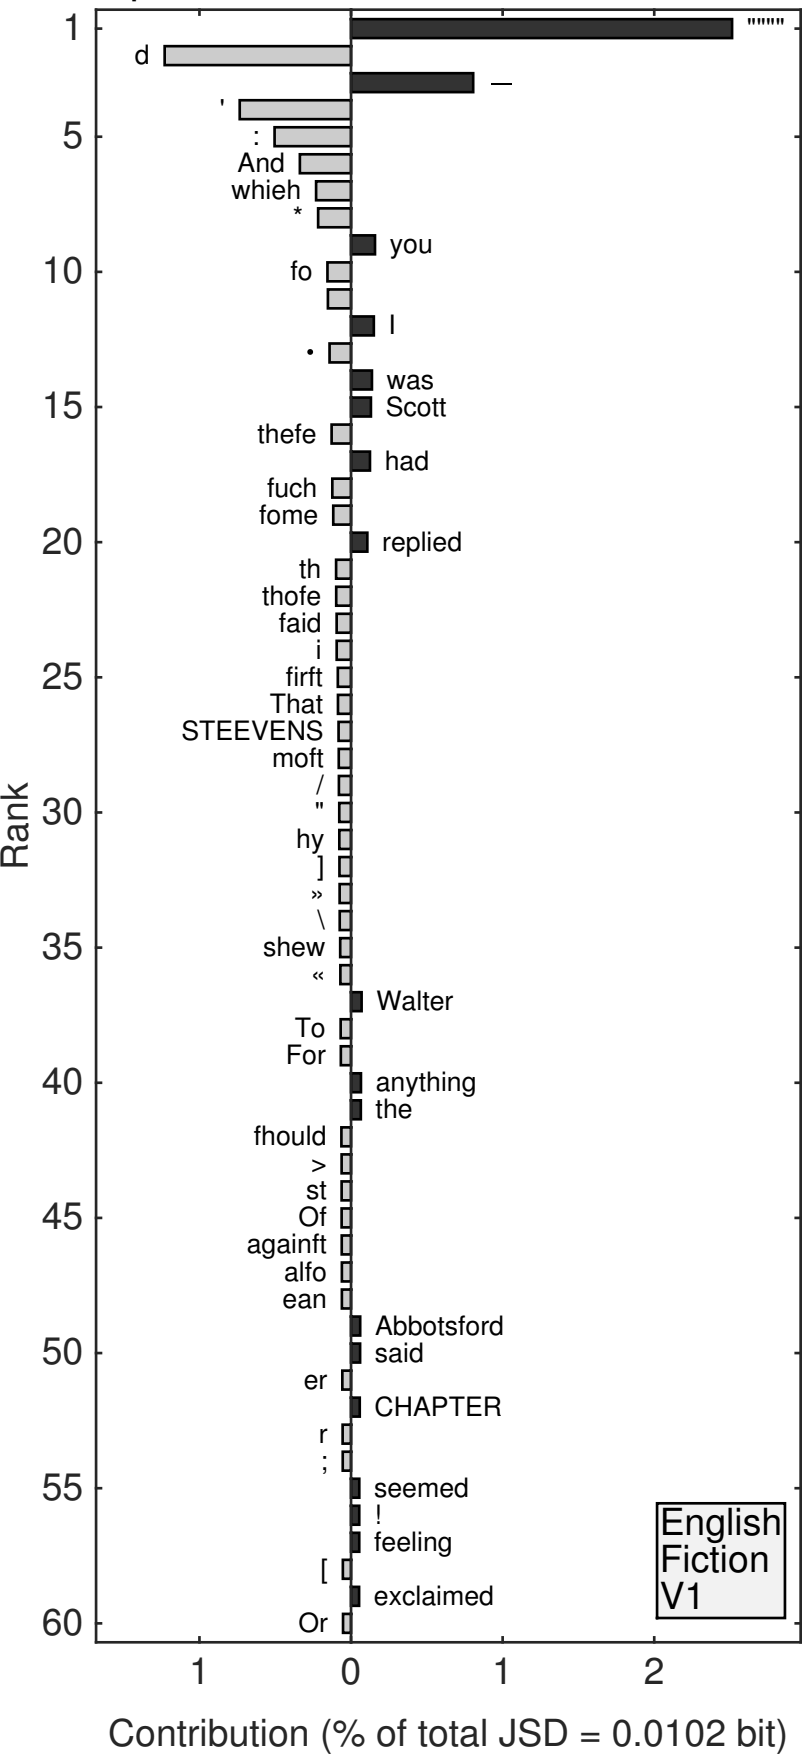

# Top JSD contributions: 1810s to 1840s

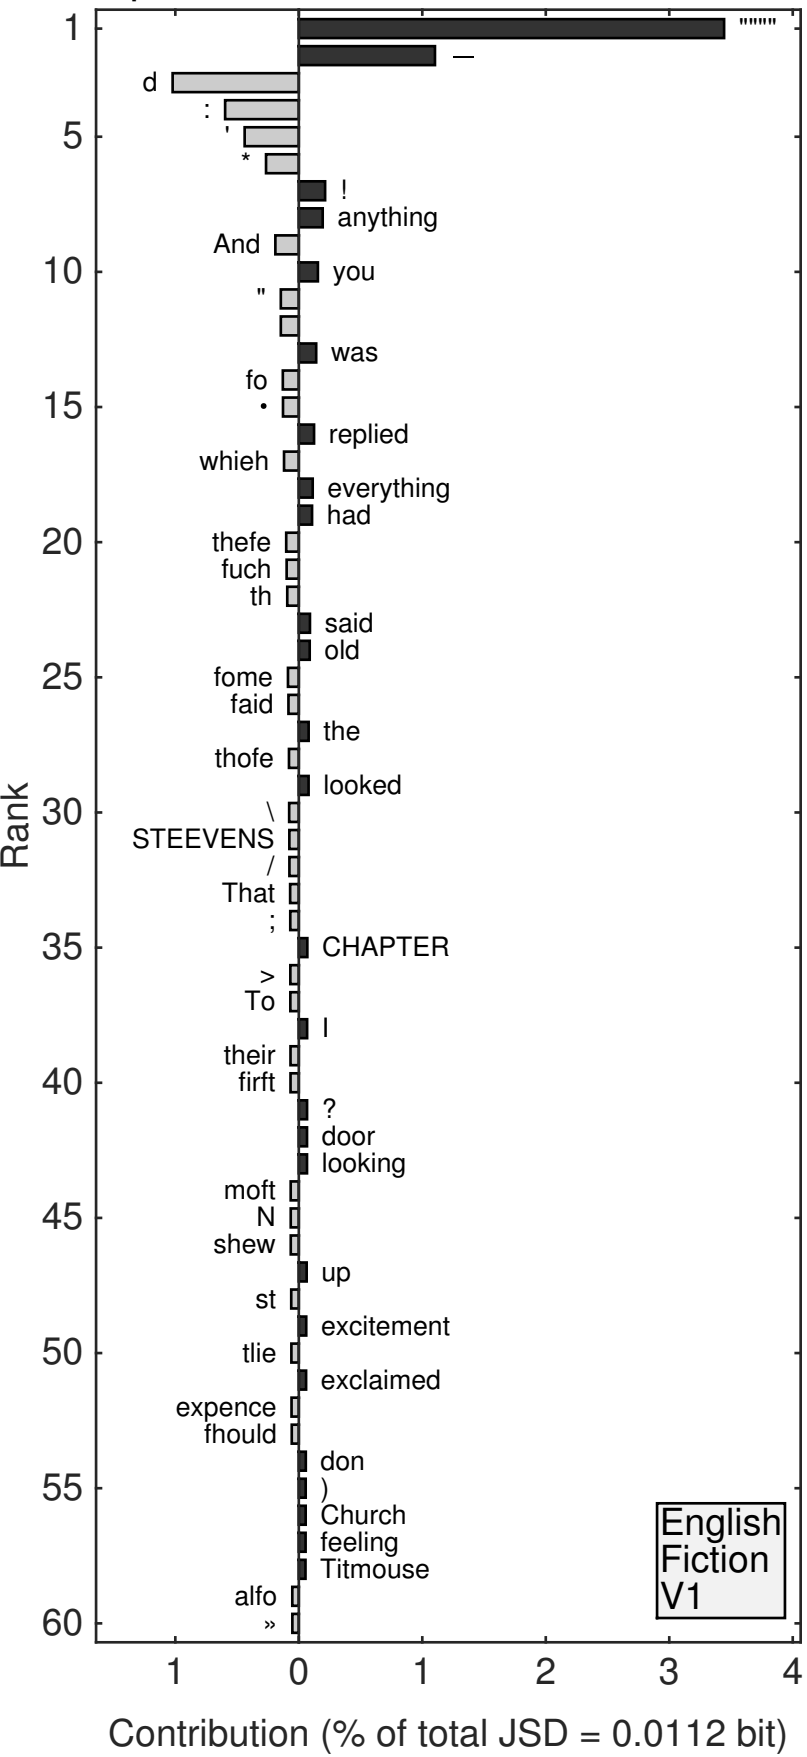

# Top JSD contributions: 1810s to 1850s

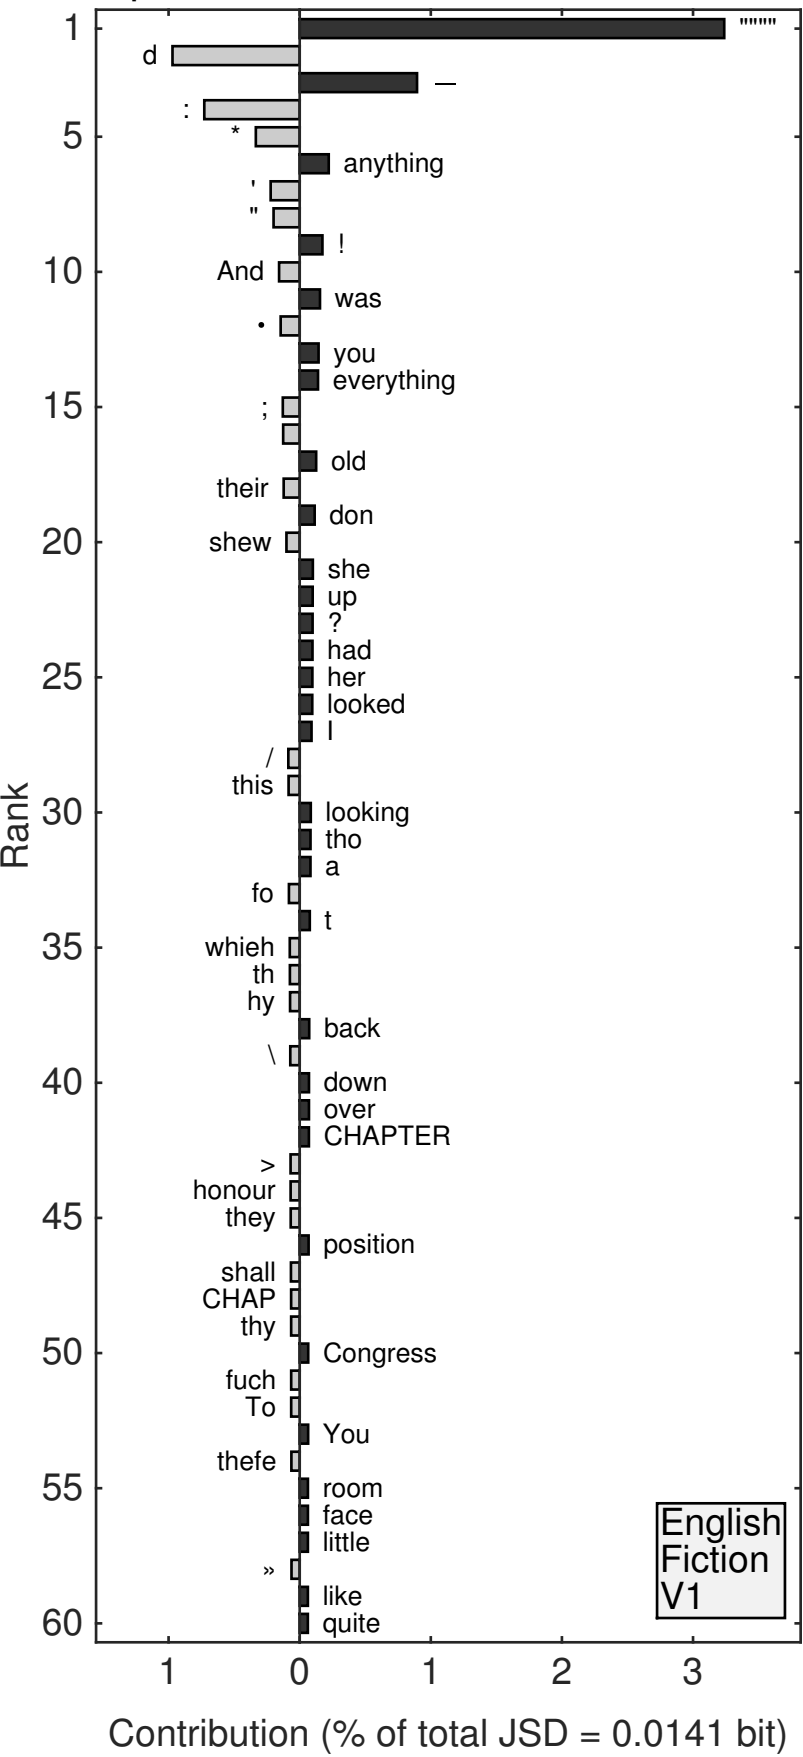

# Top JSD contributions: 1810s to 1860s

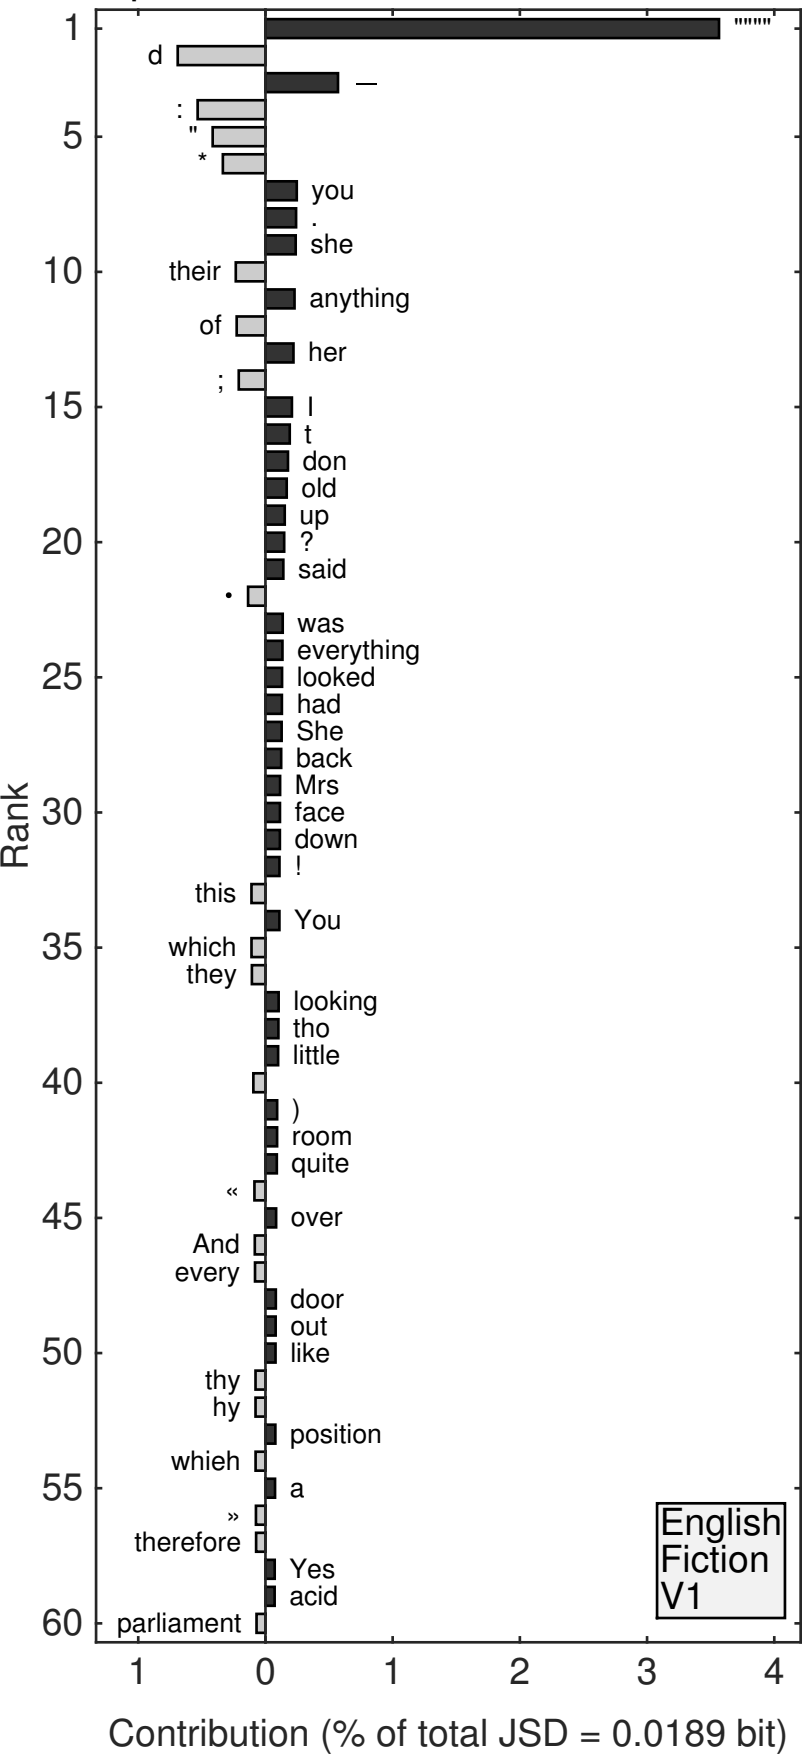



# Top JSD contributions: 1810s to 1870s

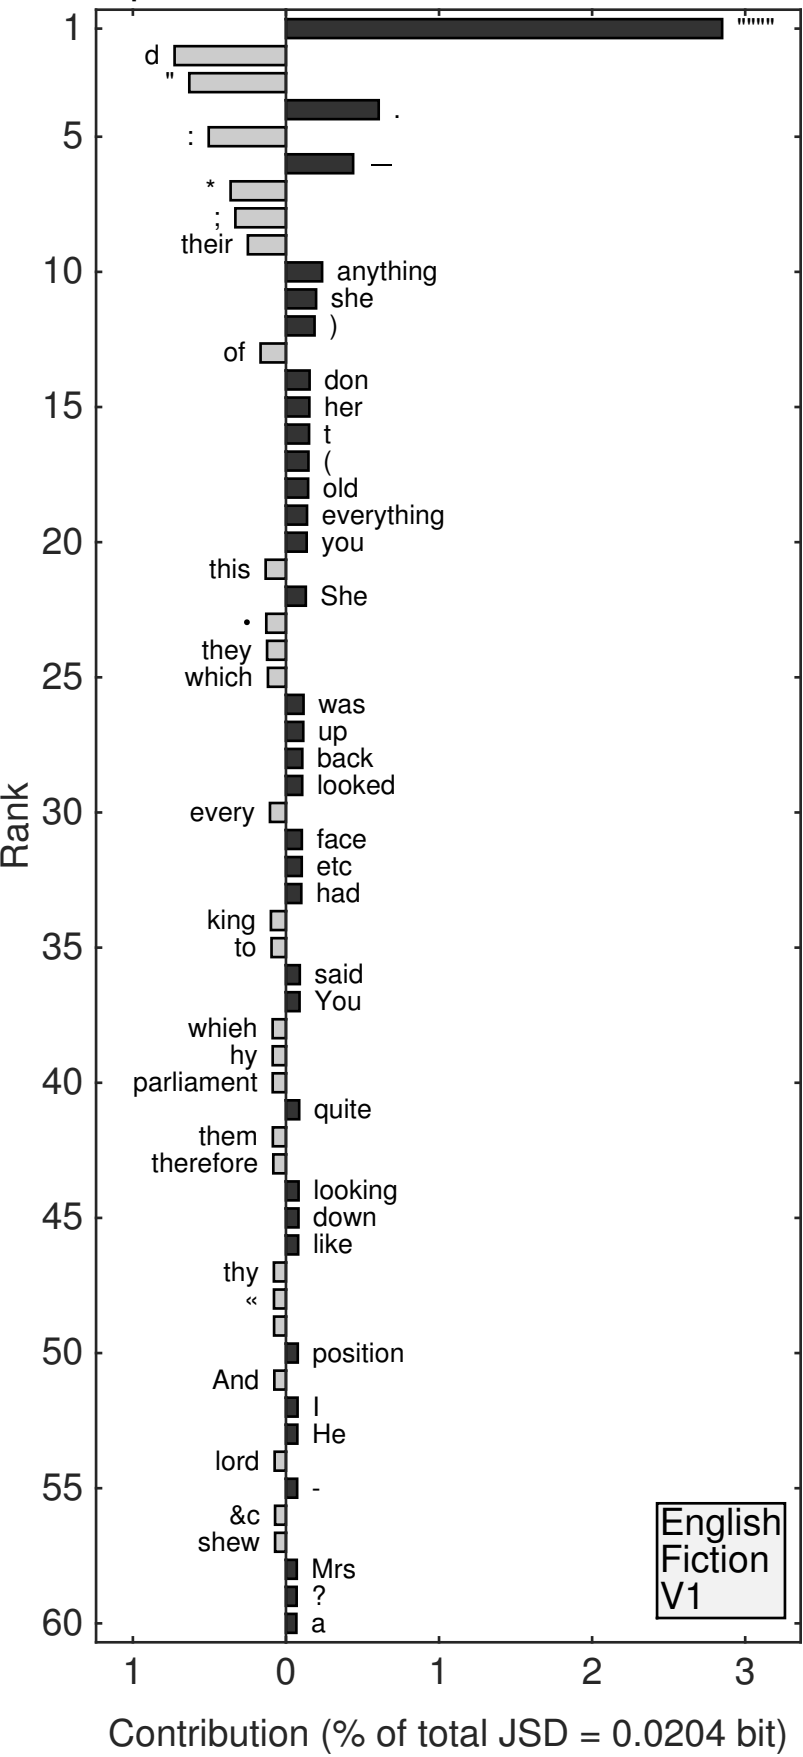

# Top JSD contributions: 1810s to 1880s

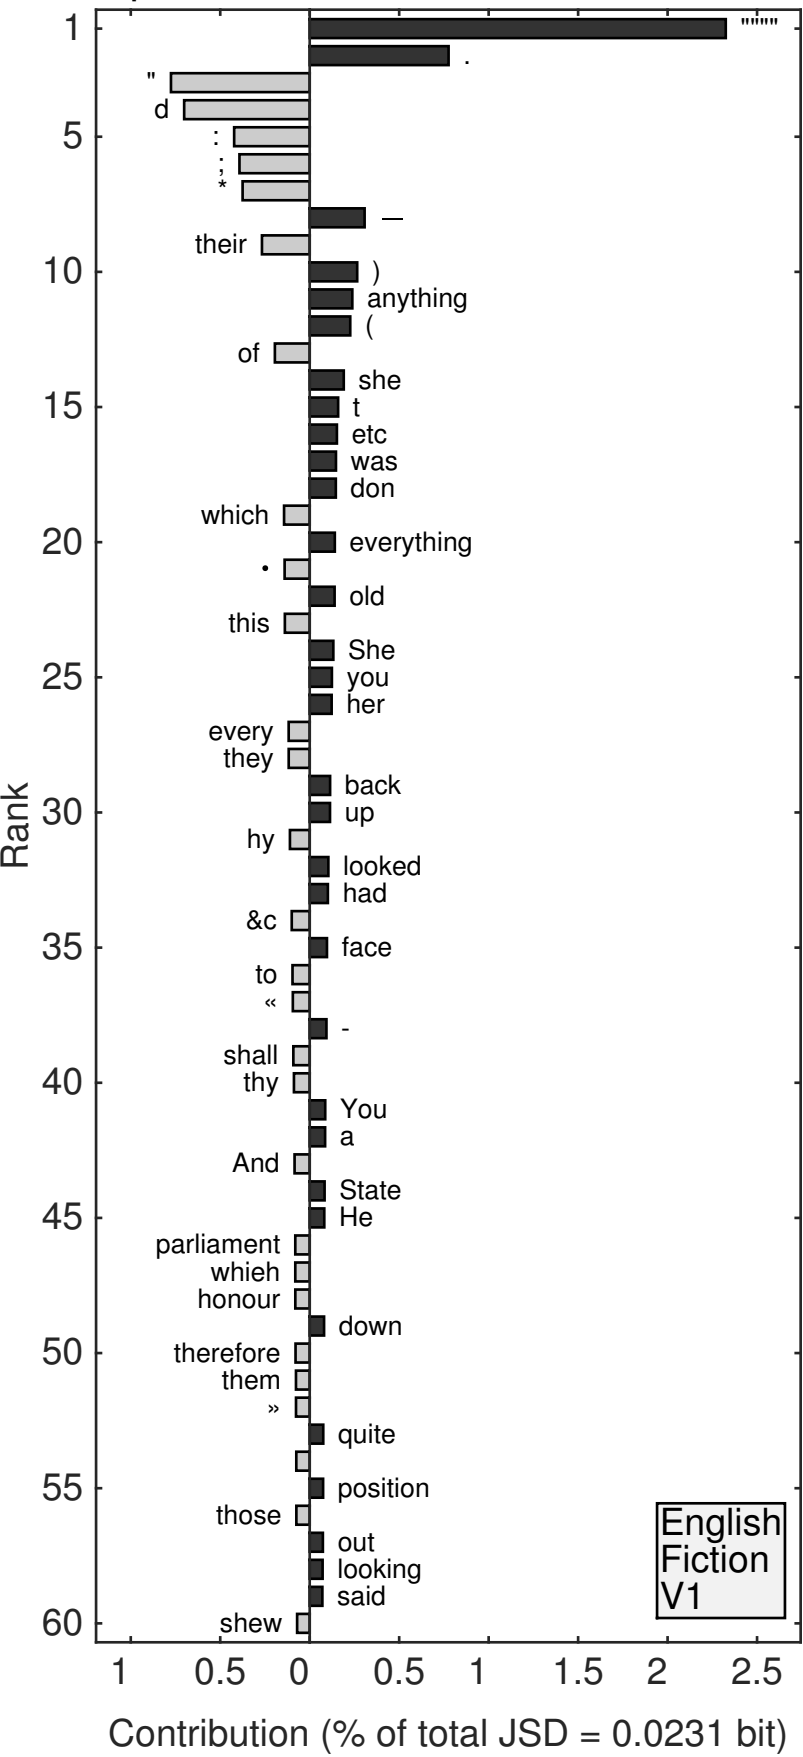

# Top JSD contributions: 1810s to 1890s

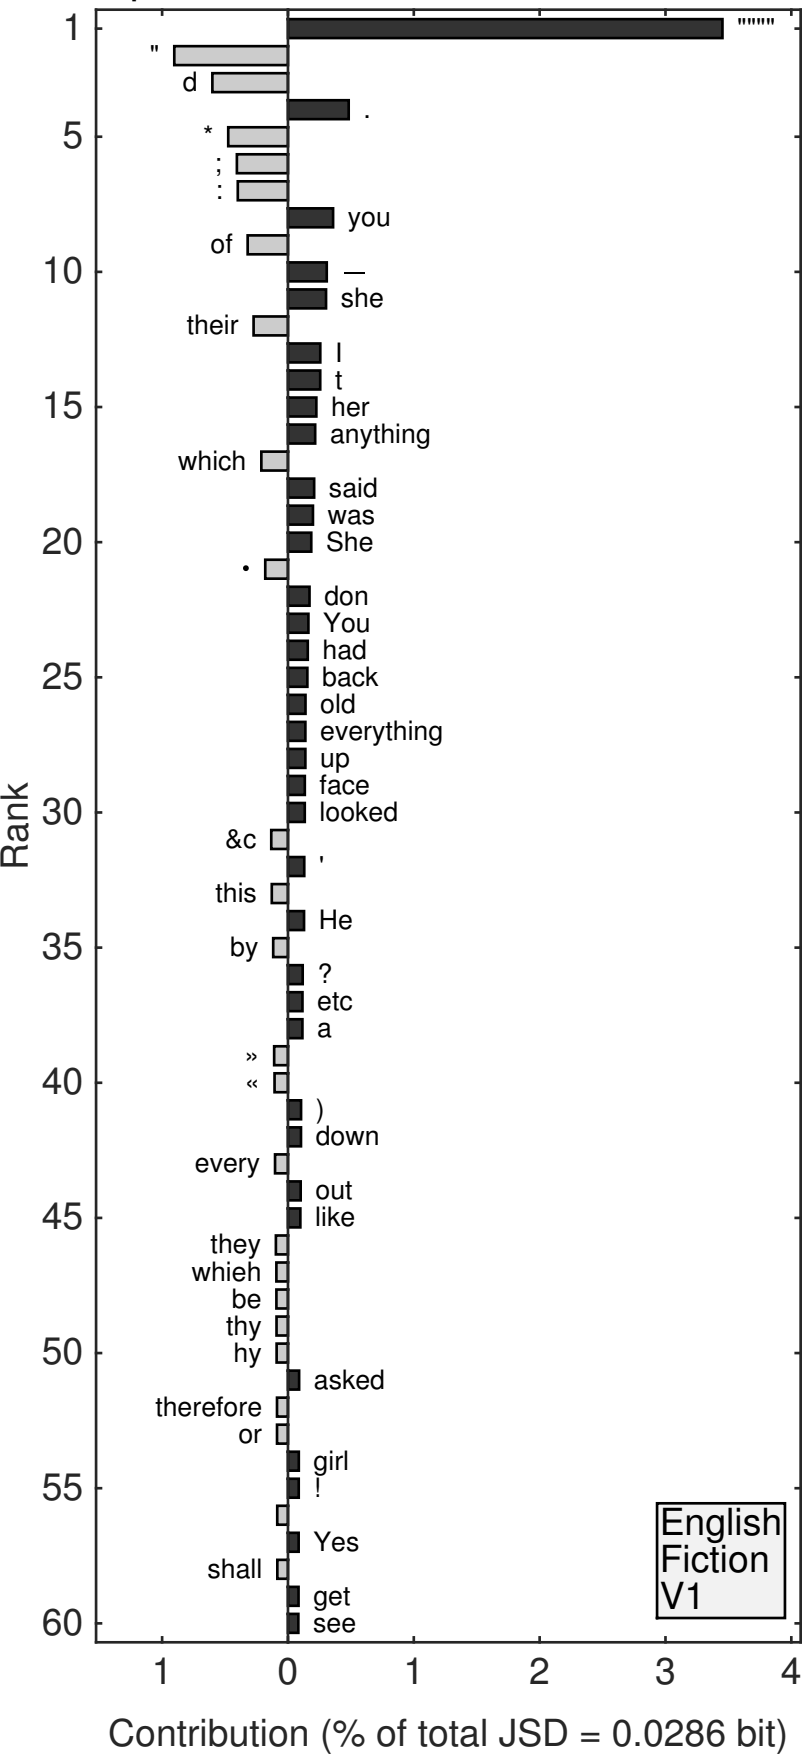

# Top JSD contributions: 1810s to 1900s

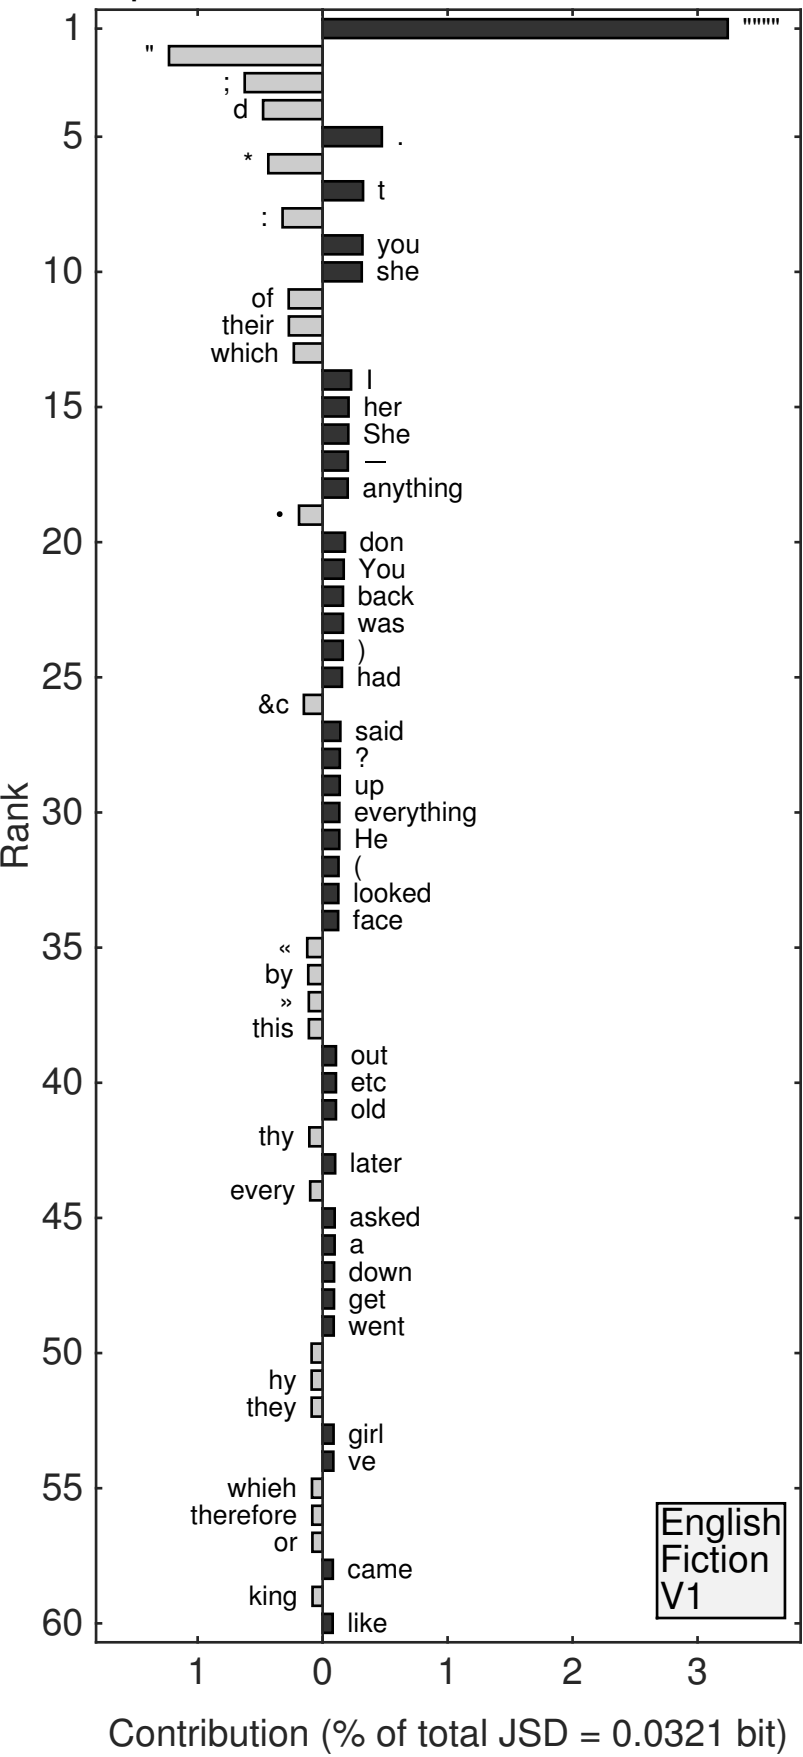

# Top JSD contributions: 1810s to 1910s

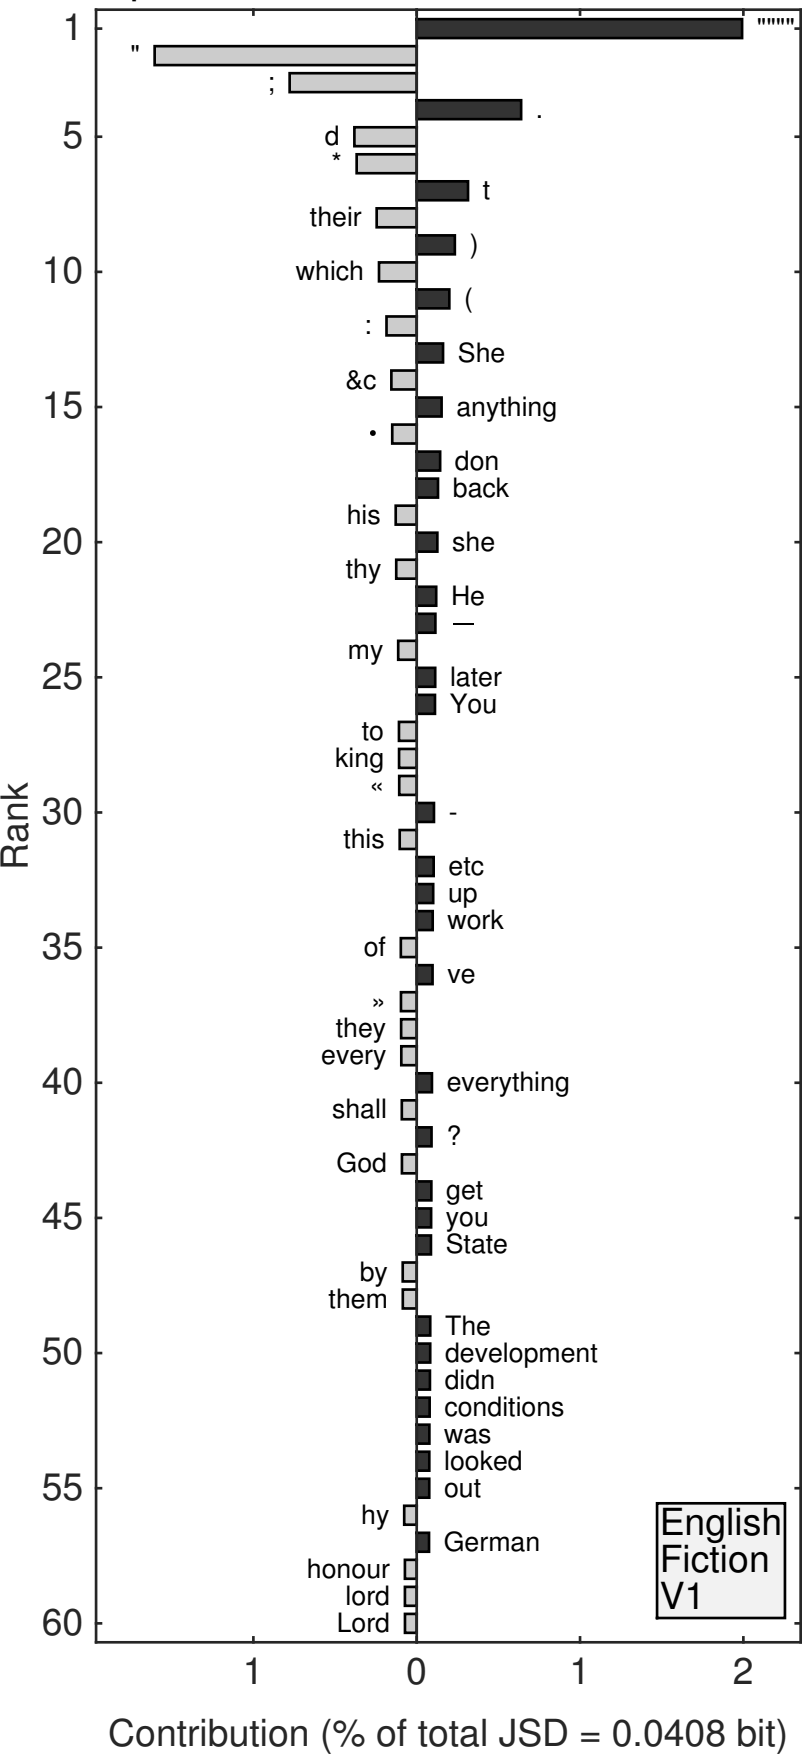

# Top JSD contributions: 1810s to 1920s

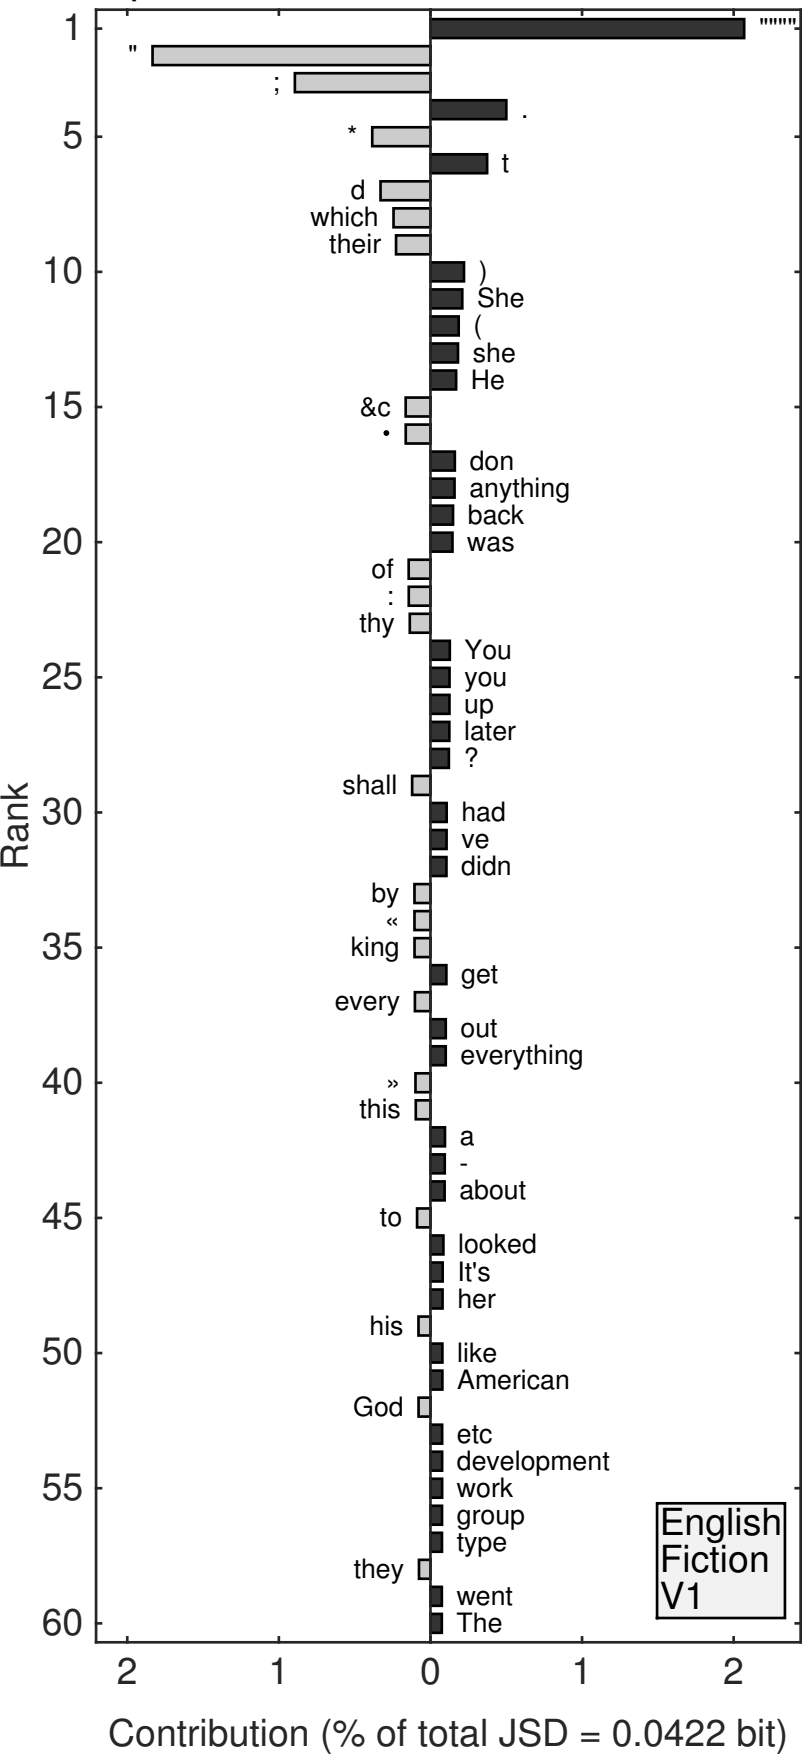

# Top JSD contributions: 1810s to 1930s

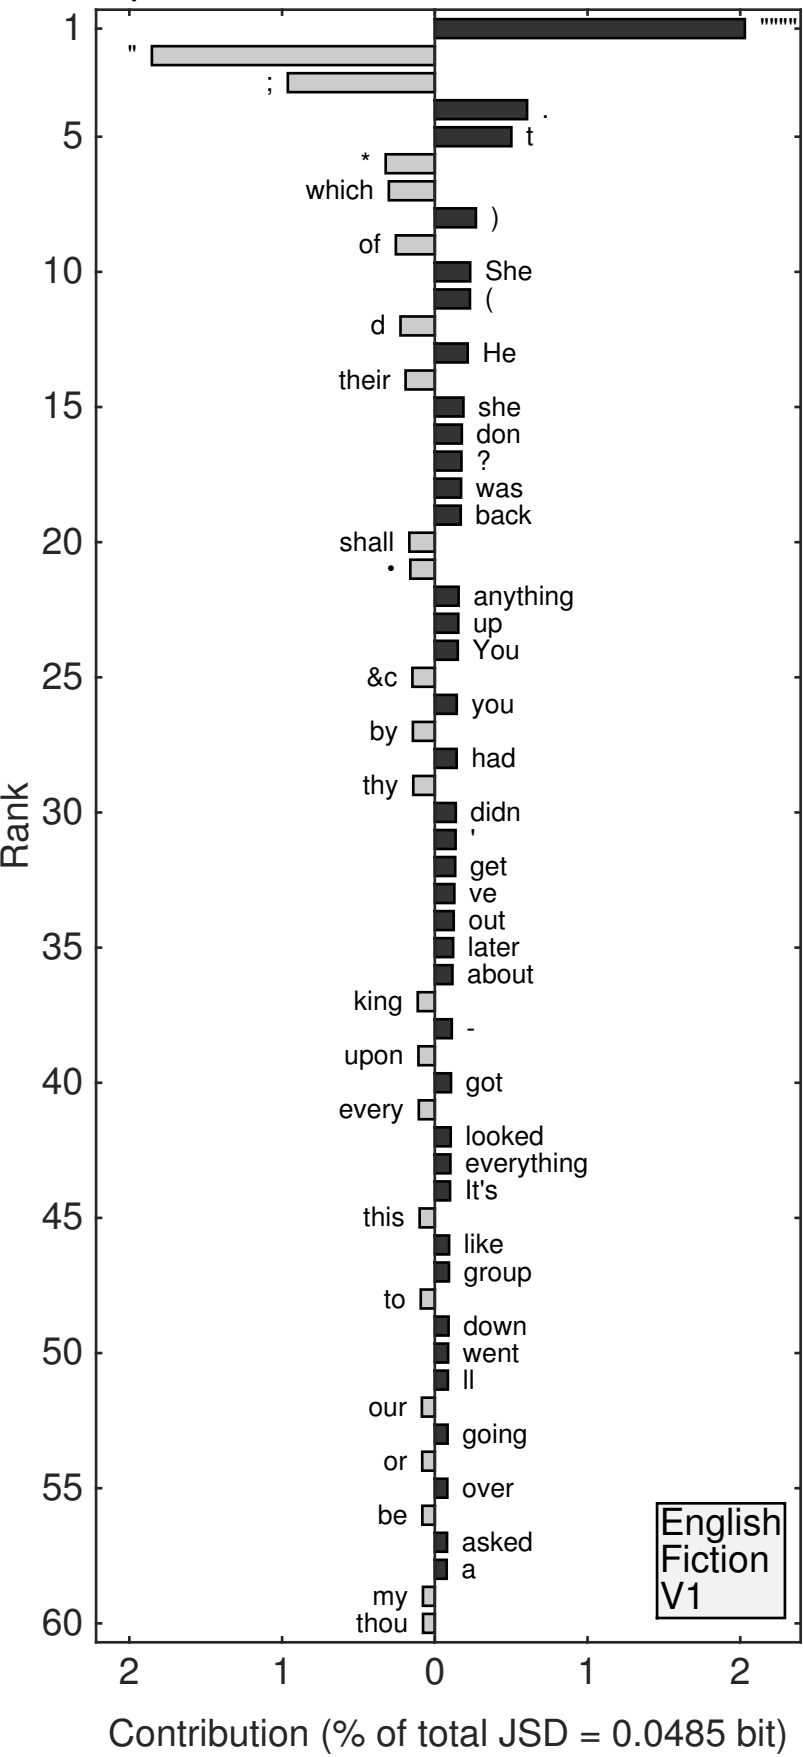

# Top JSD contributions: 1810s to 1940s

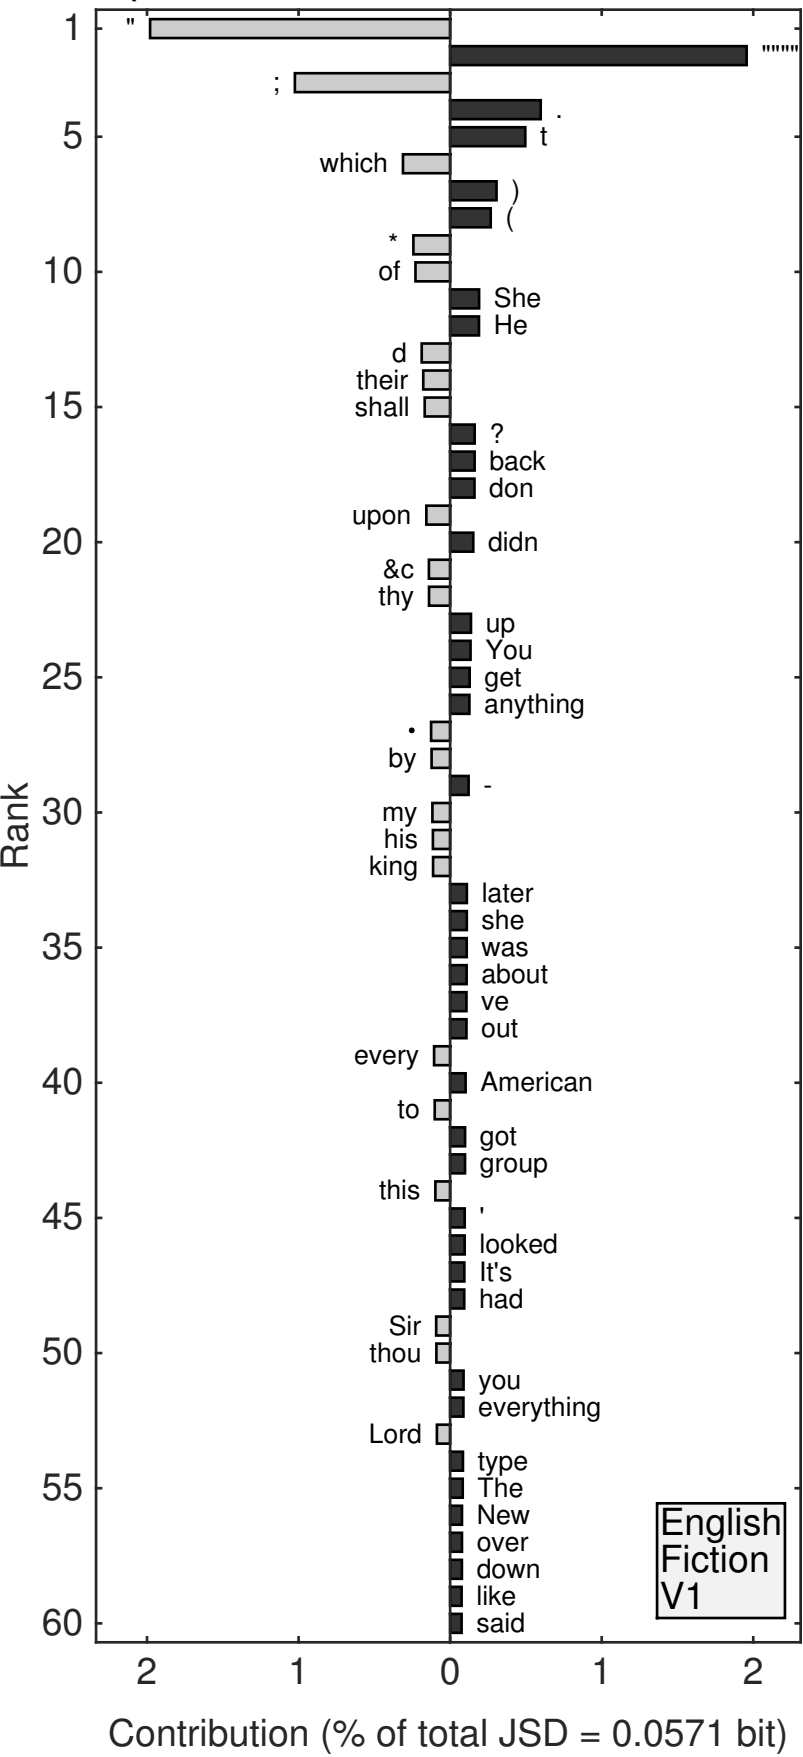



# Top JSD contributions: 1810s to 1950s

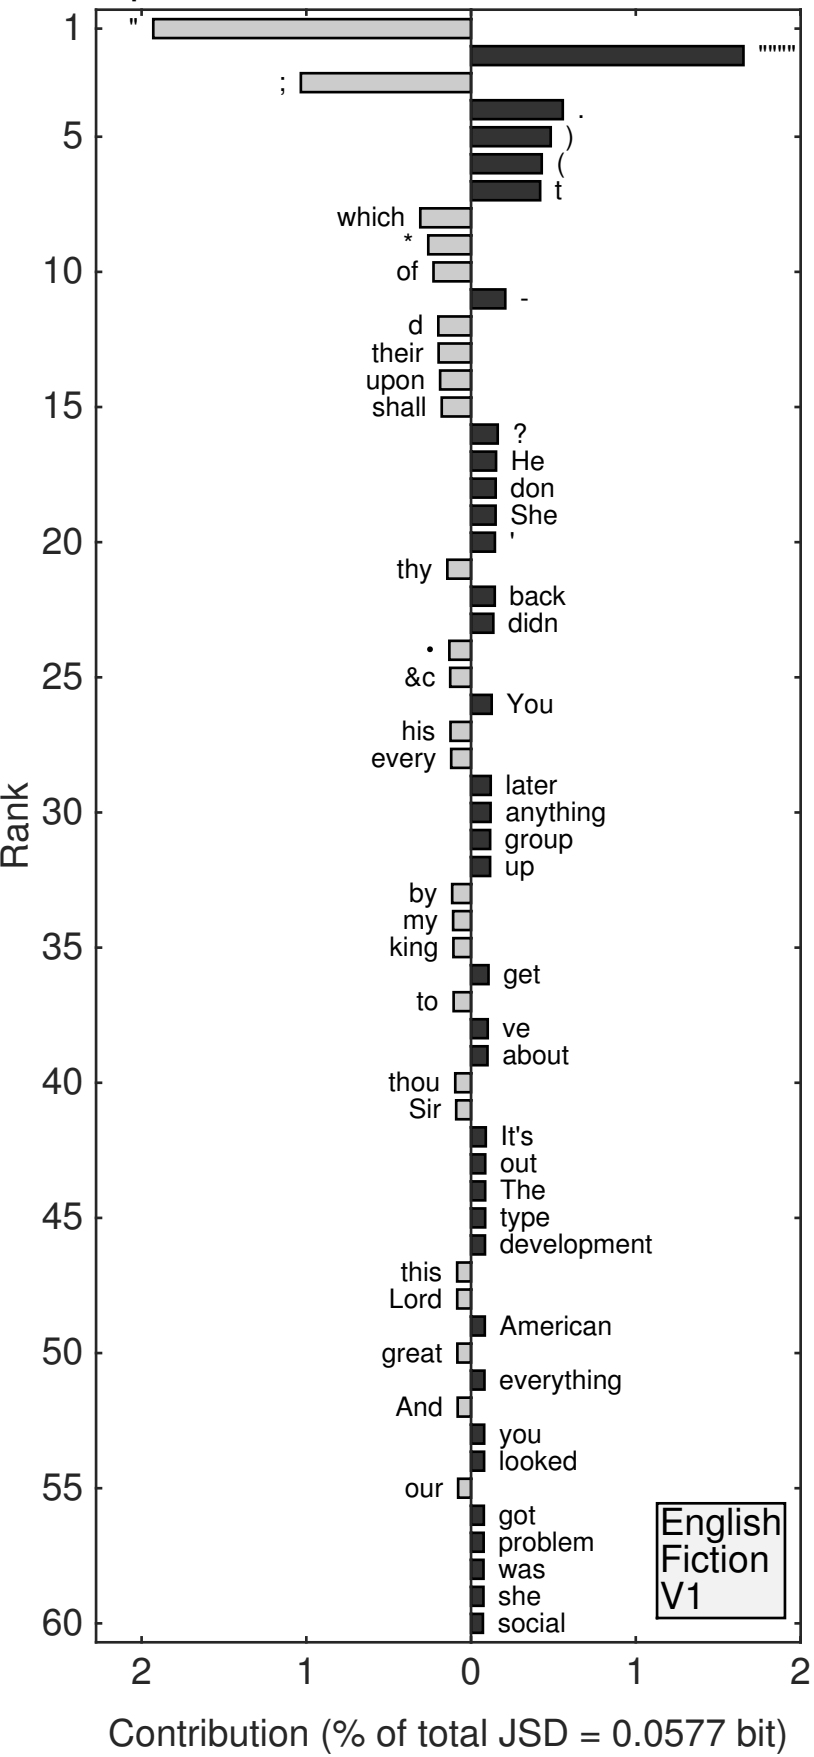

# Top JSD contributions: 1810s to 1960s

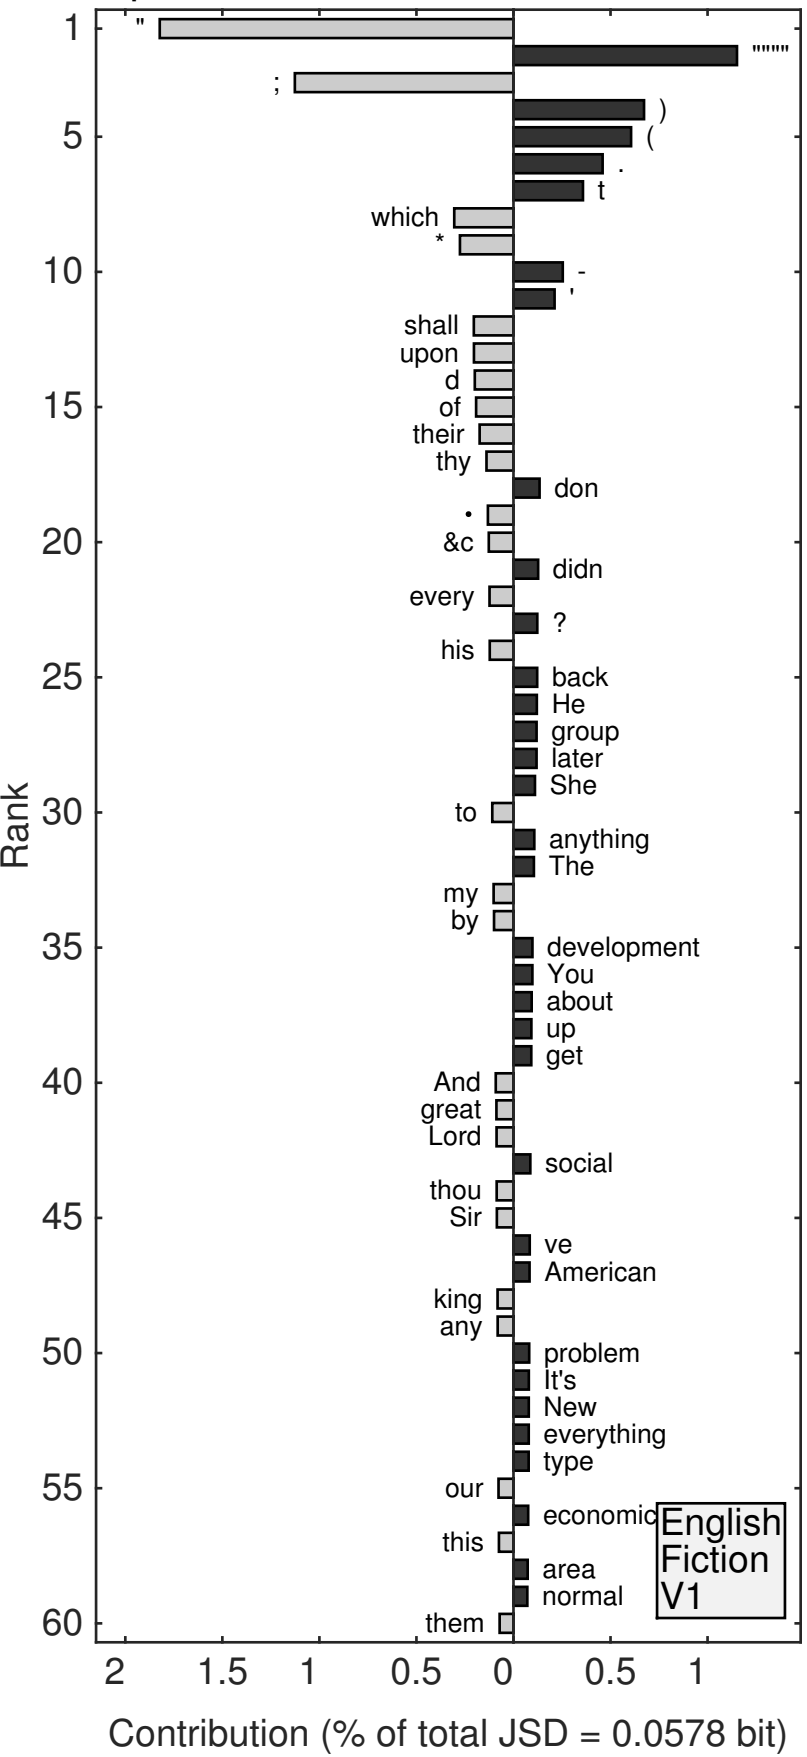

English Fiction V1

# Top JSD contributions: 1810s to 1970s

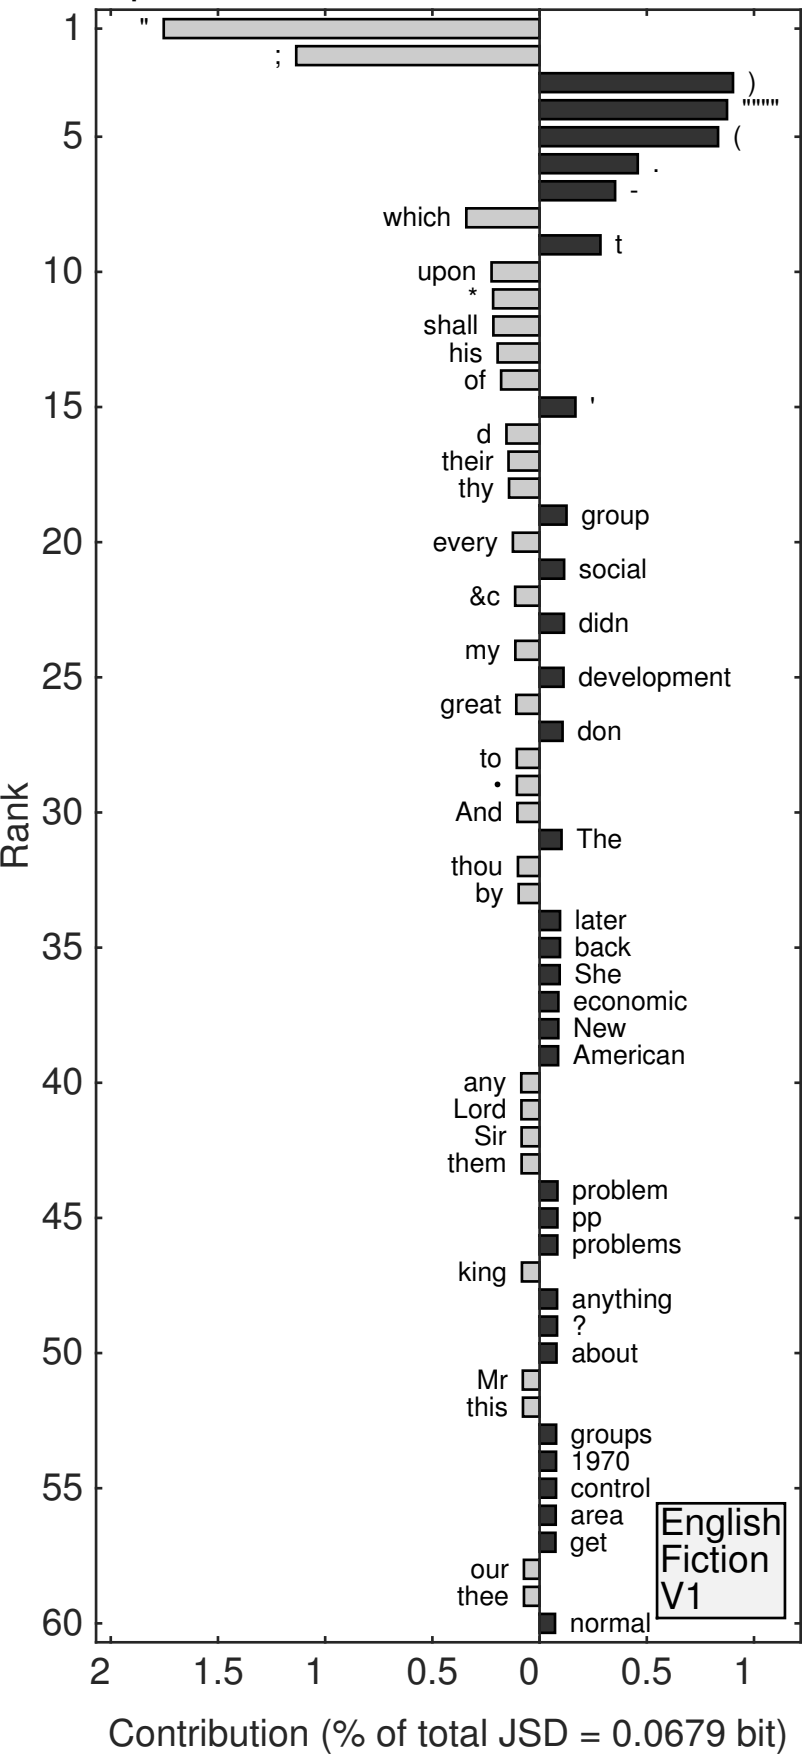

# Top JSD contributions: 1810s to 1980s

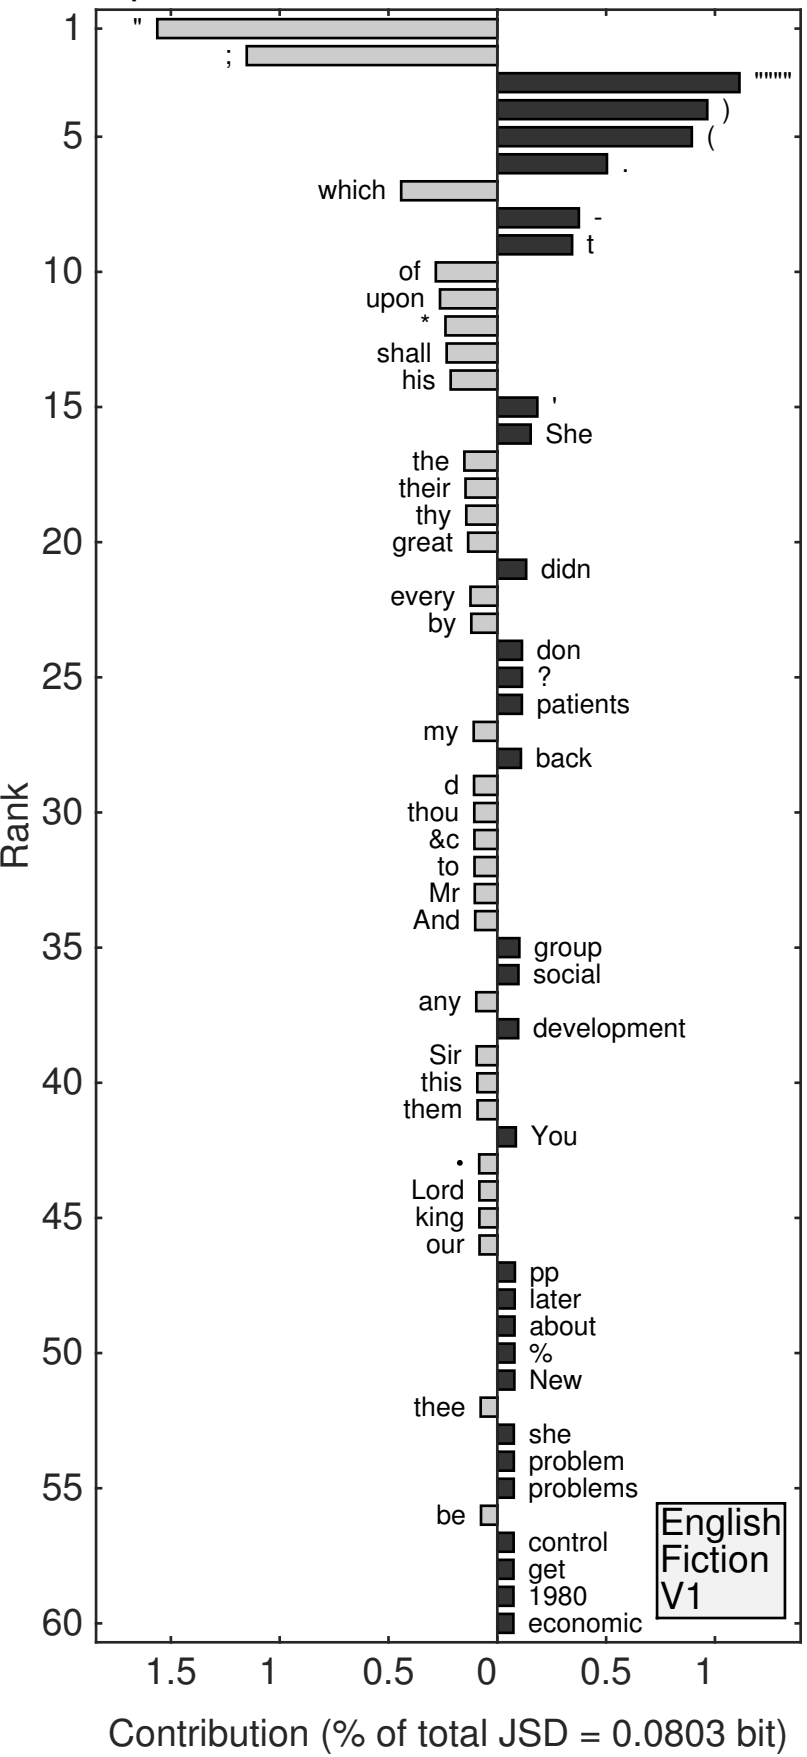

# Top JSD contributions: 1810s to 1990s

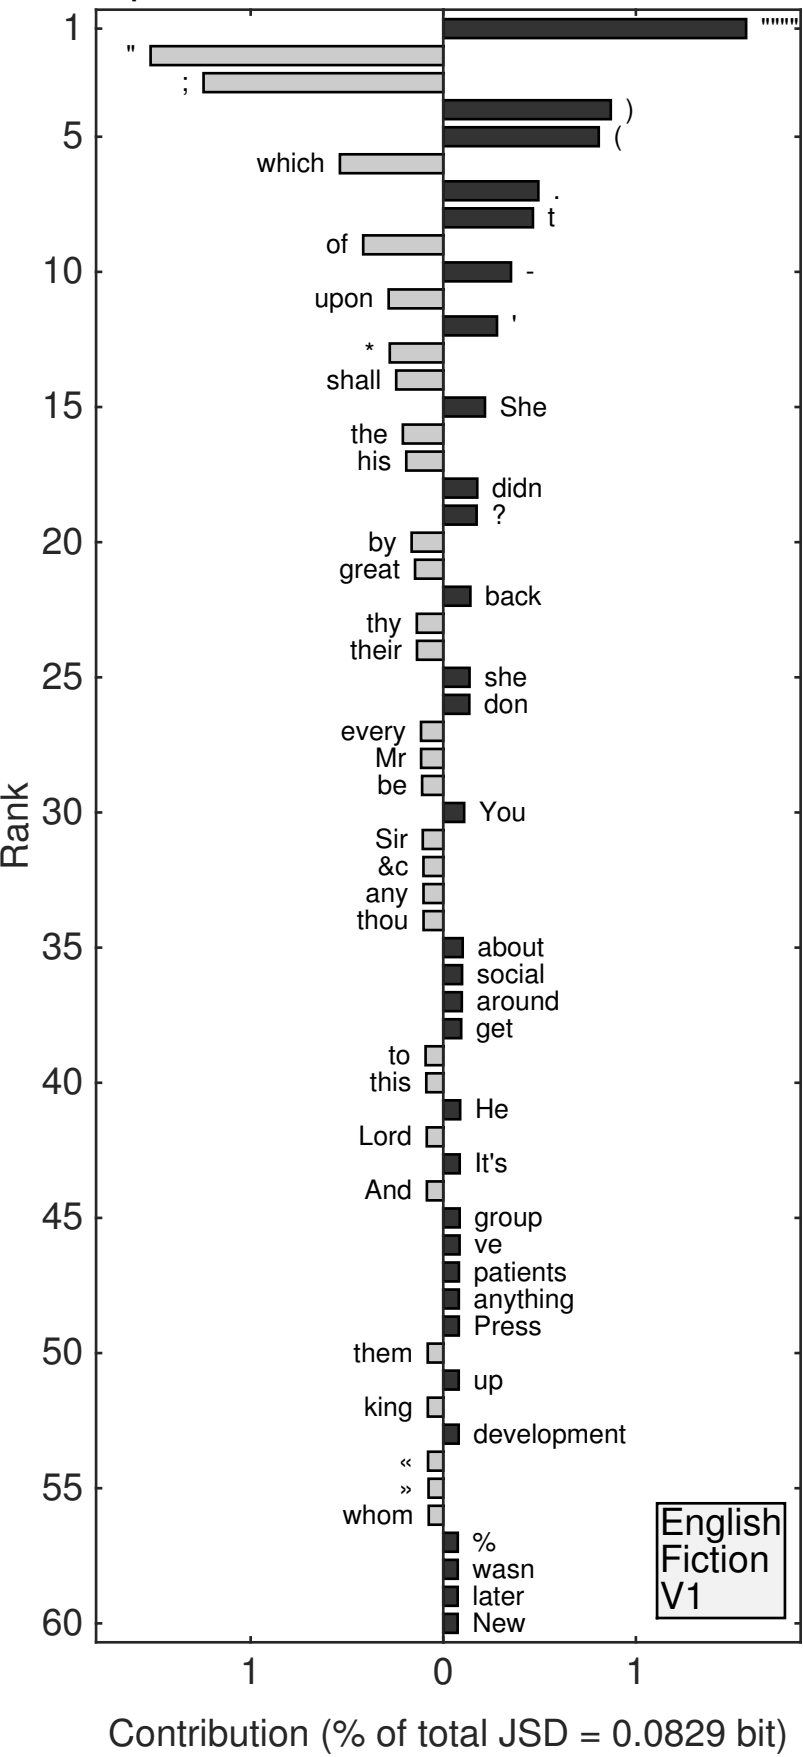

# Top JSD contributions: 1820s to 1830s

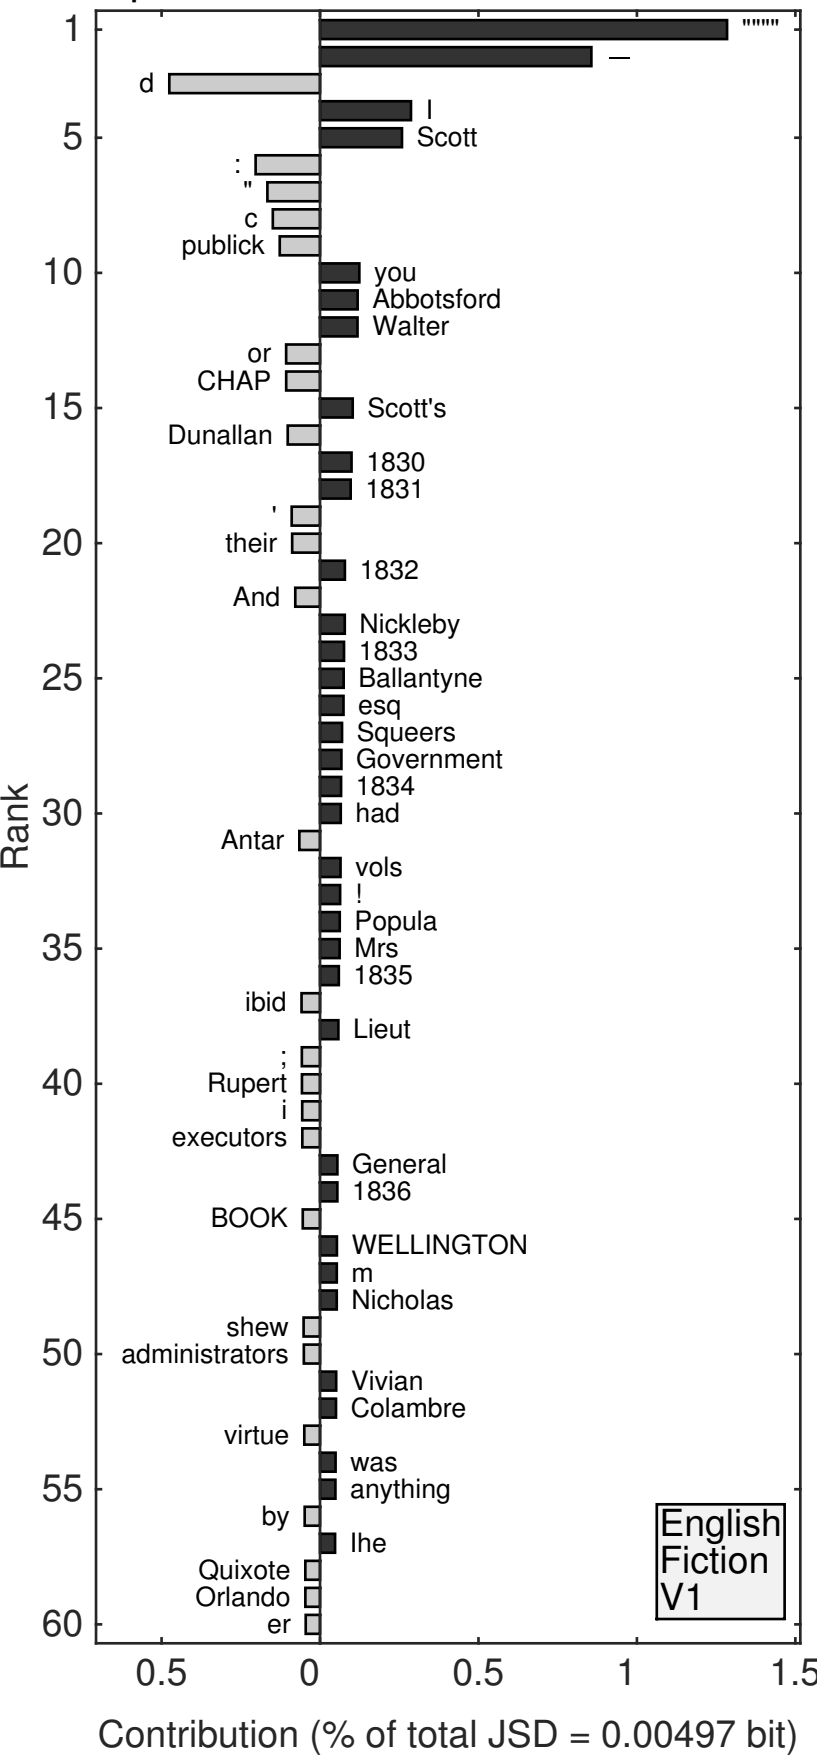

English Fiction V1

# Top JSD contributions: 1820s to 1840s

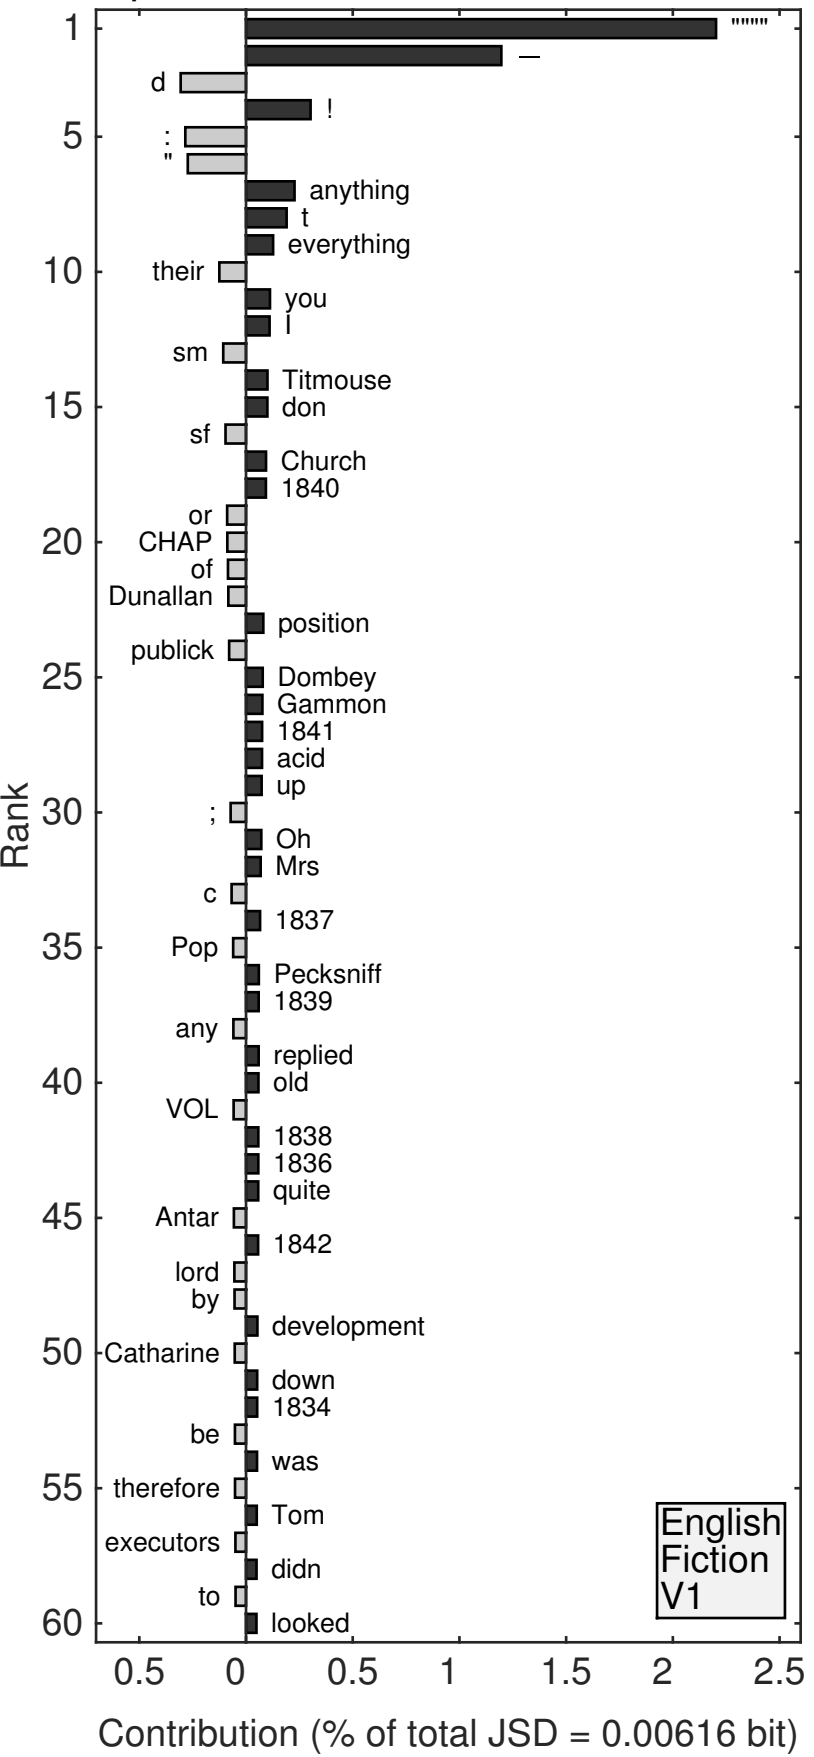

English Fiction V1

# Top JSD contributions: 1820s to 1850s

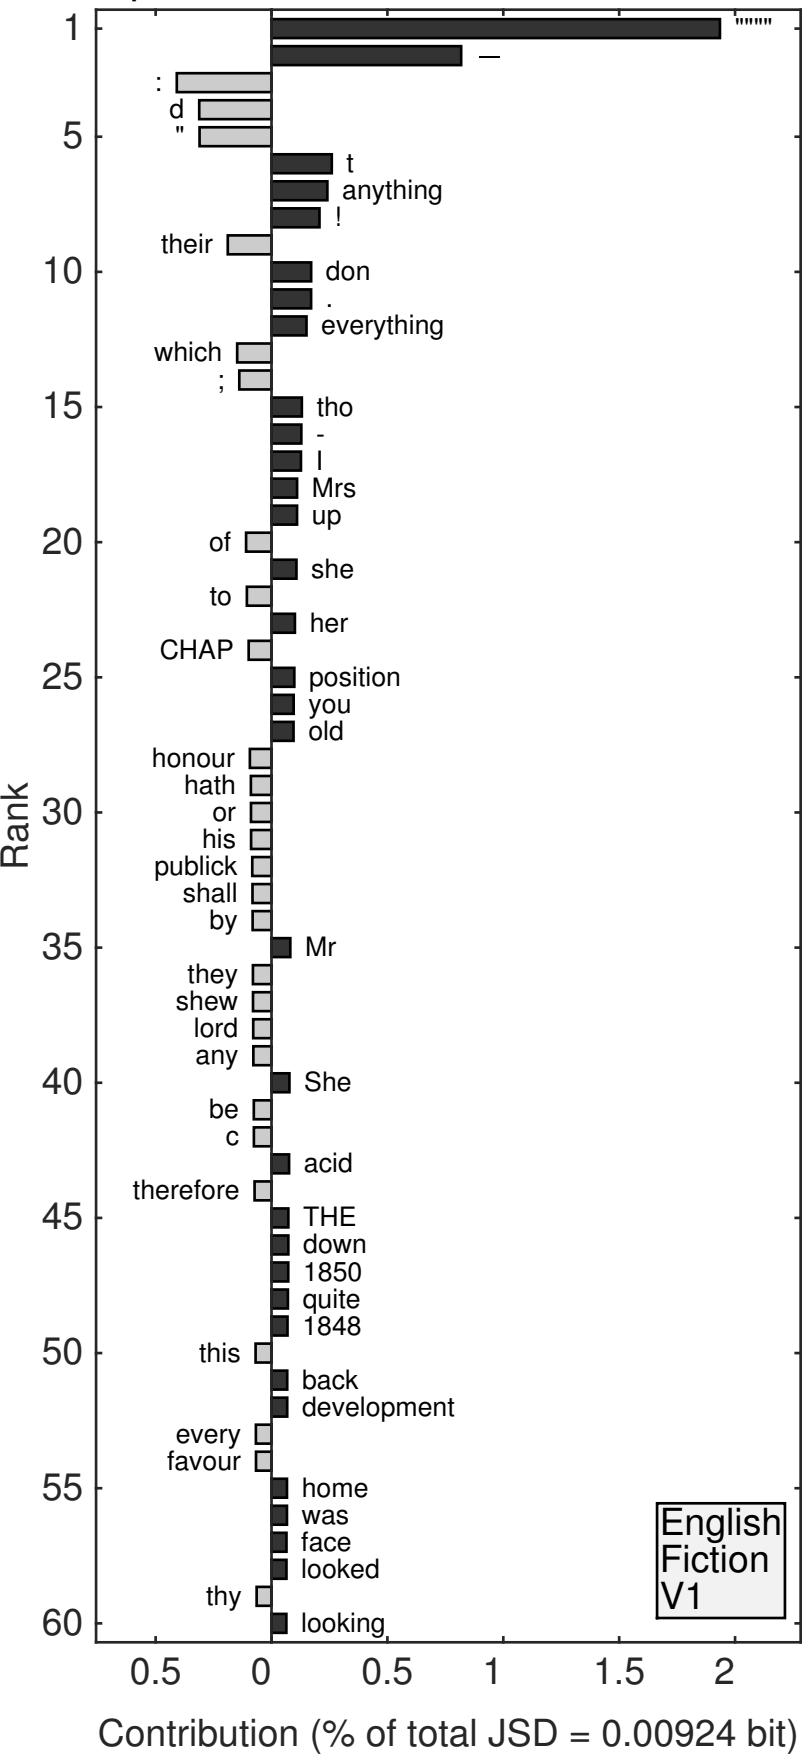



# Top JSD contributions: 1820s to 1860s

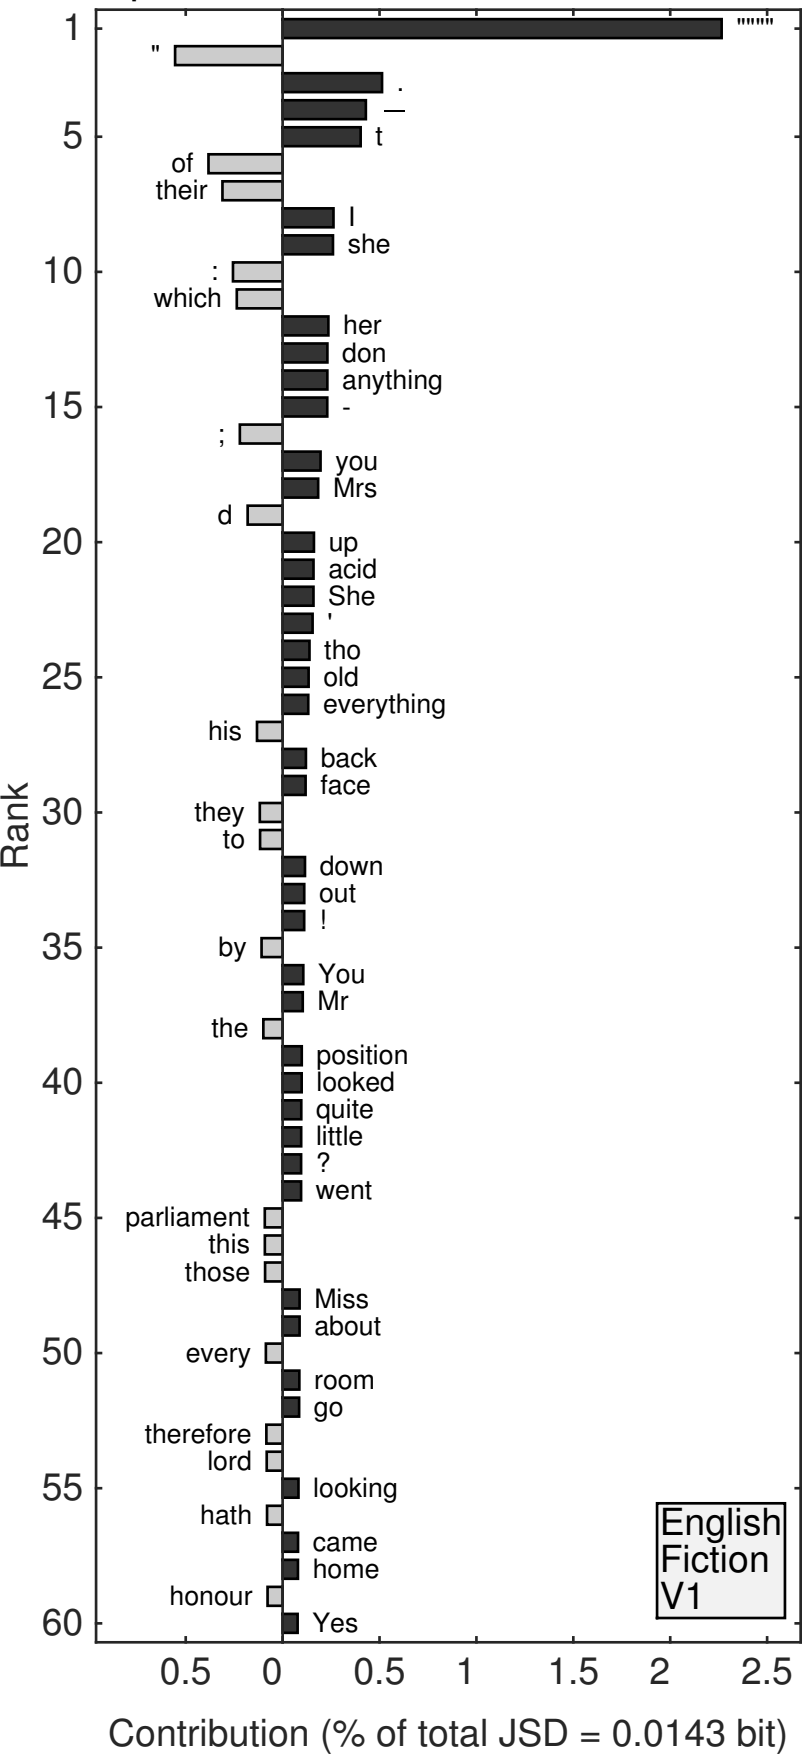

English Fiction V1

# Top JSD contributions: 1820s to 1870s

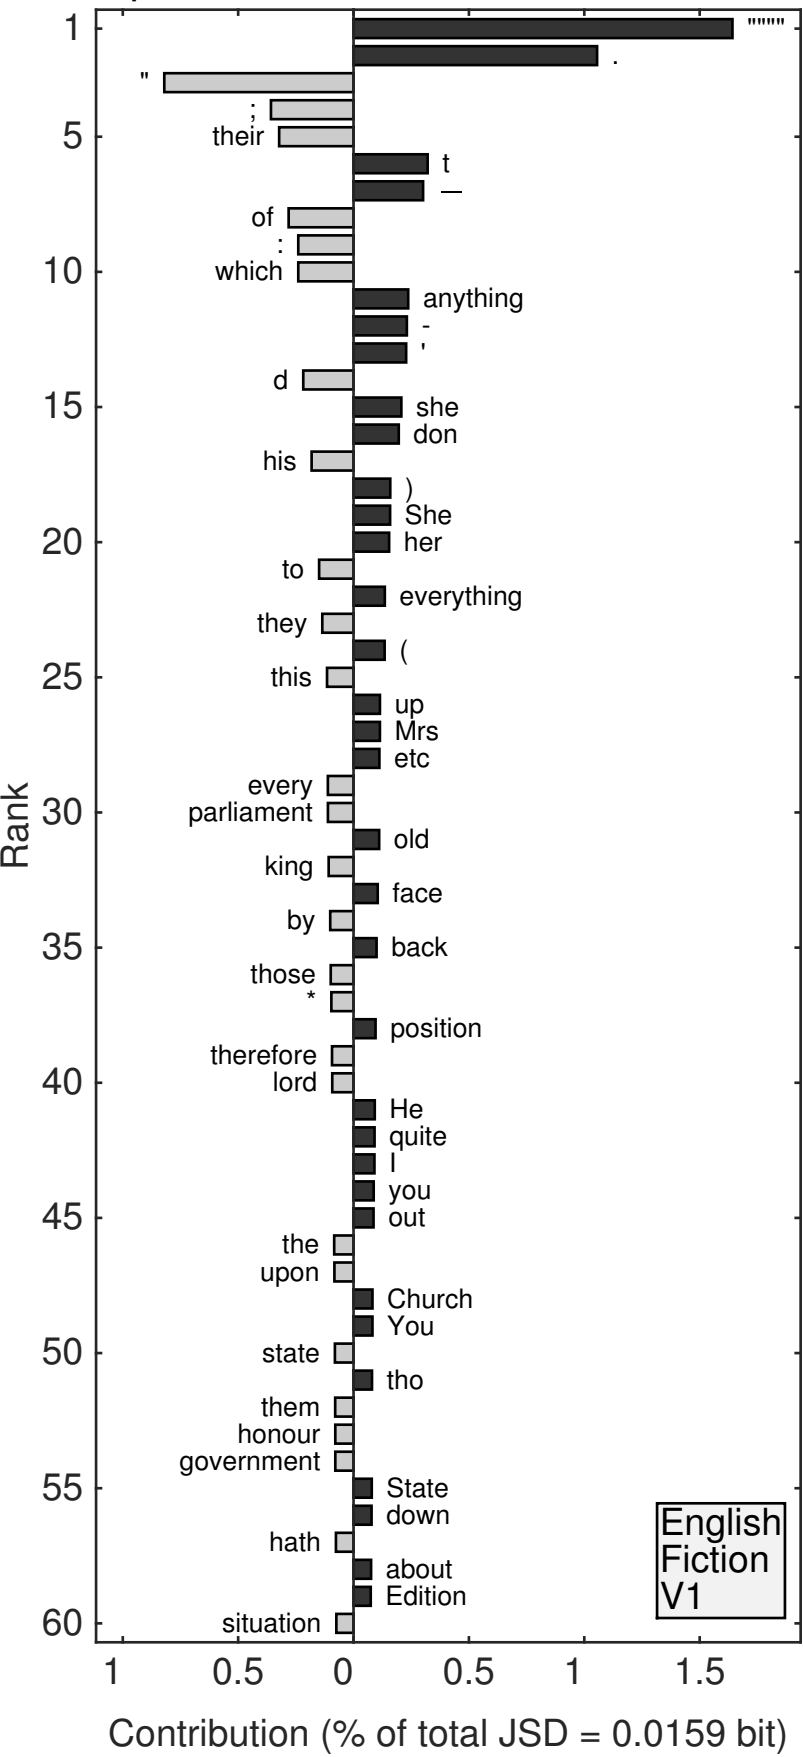

# Top JSD contributions: 1820s to 1880s

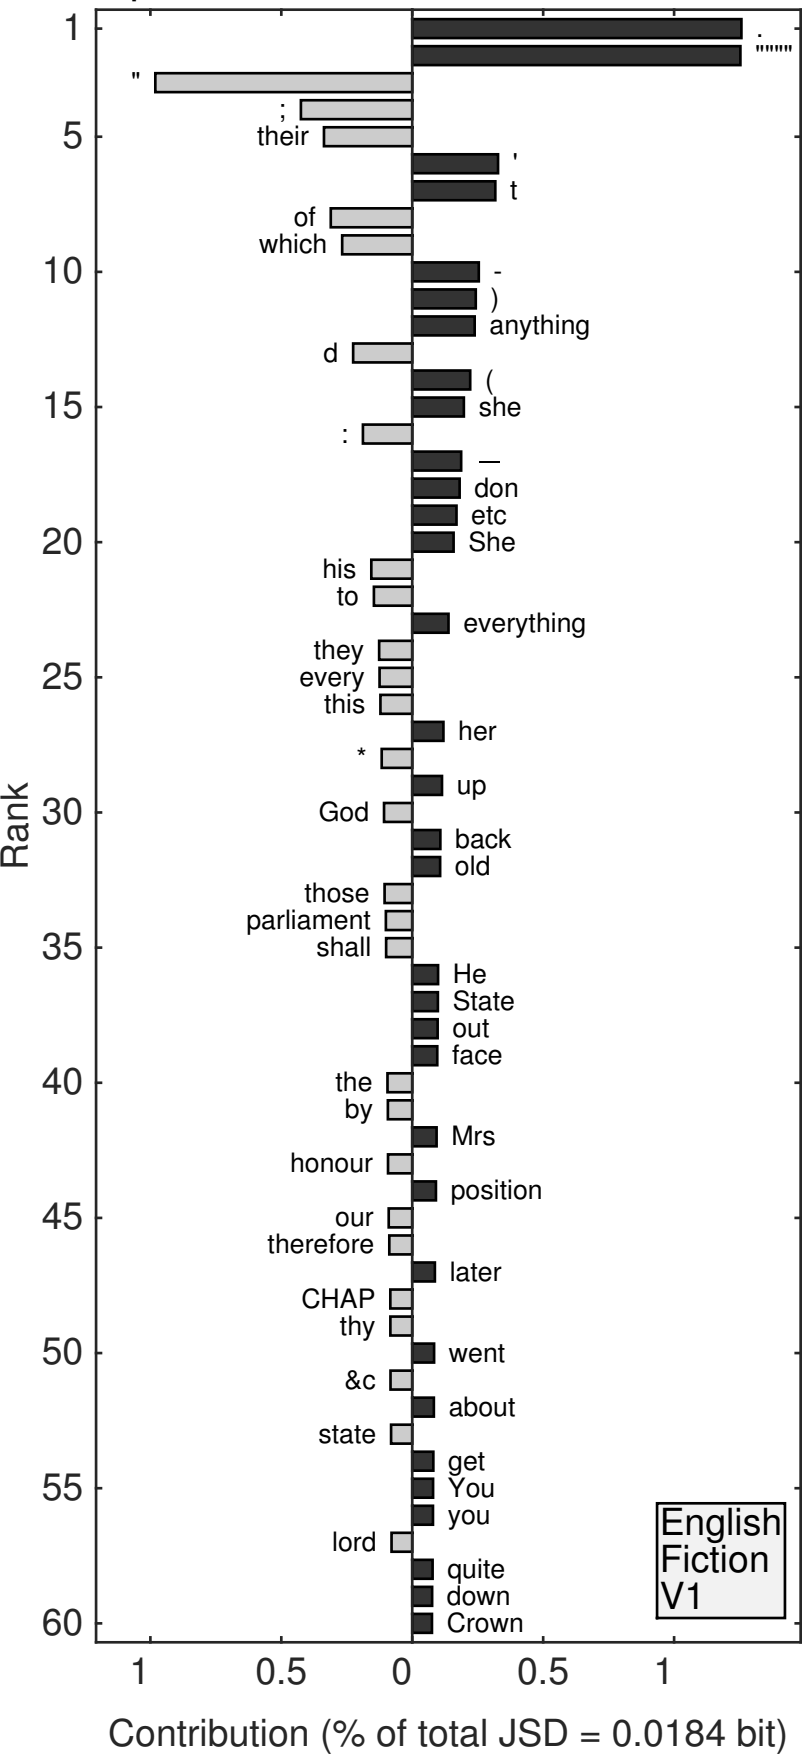

# Top JSD contributions: 1820s to 1890s

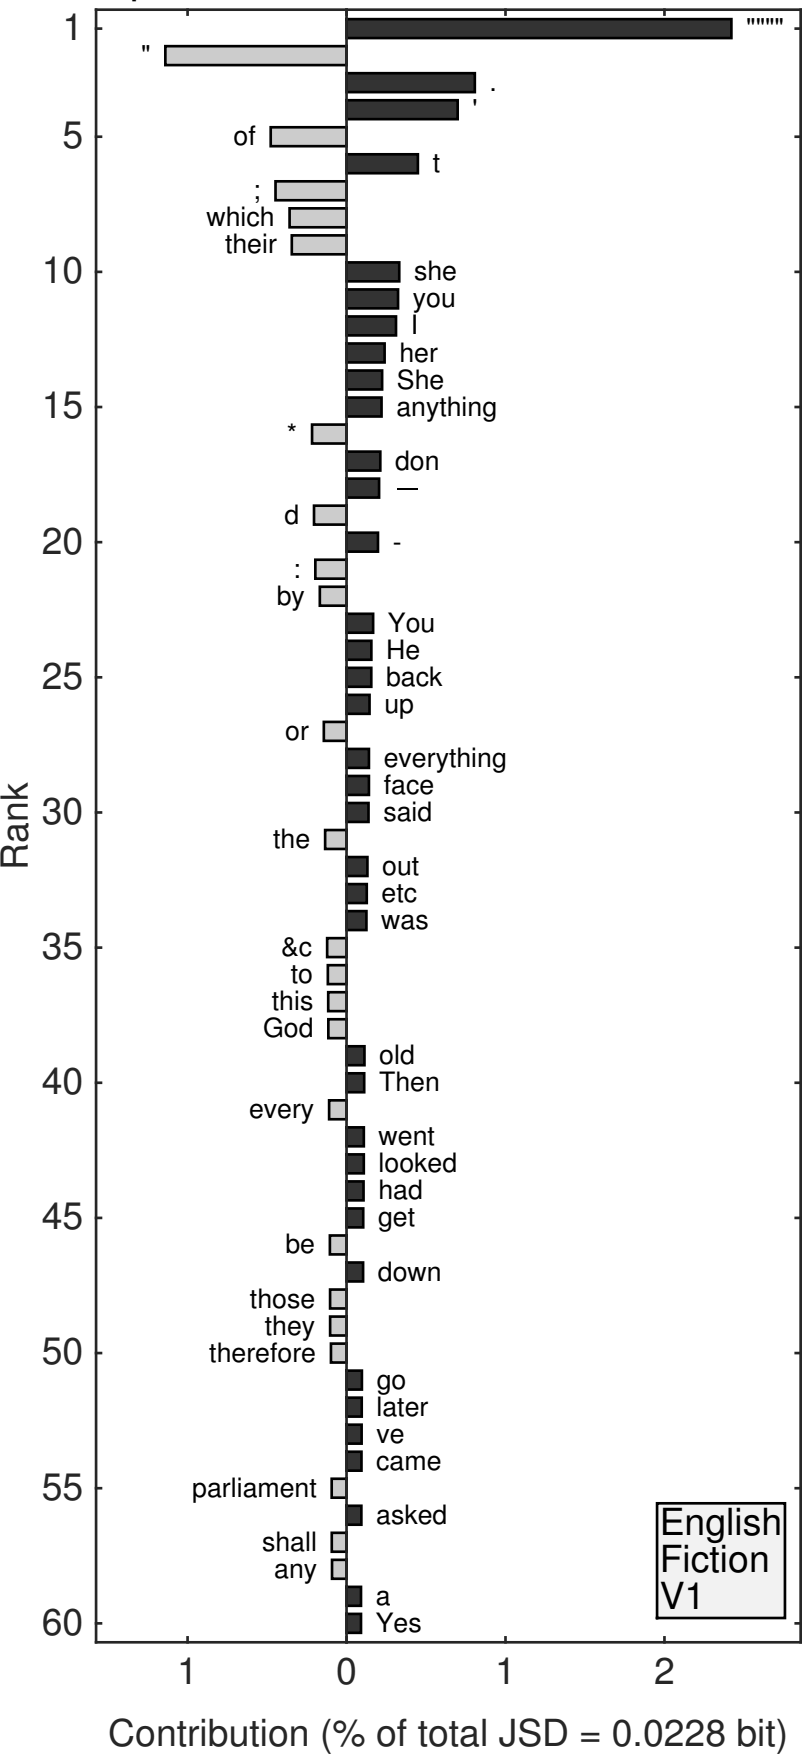

# Top JSD contributions: 1820s to 1900s

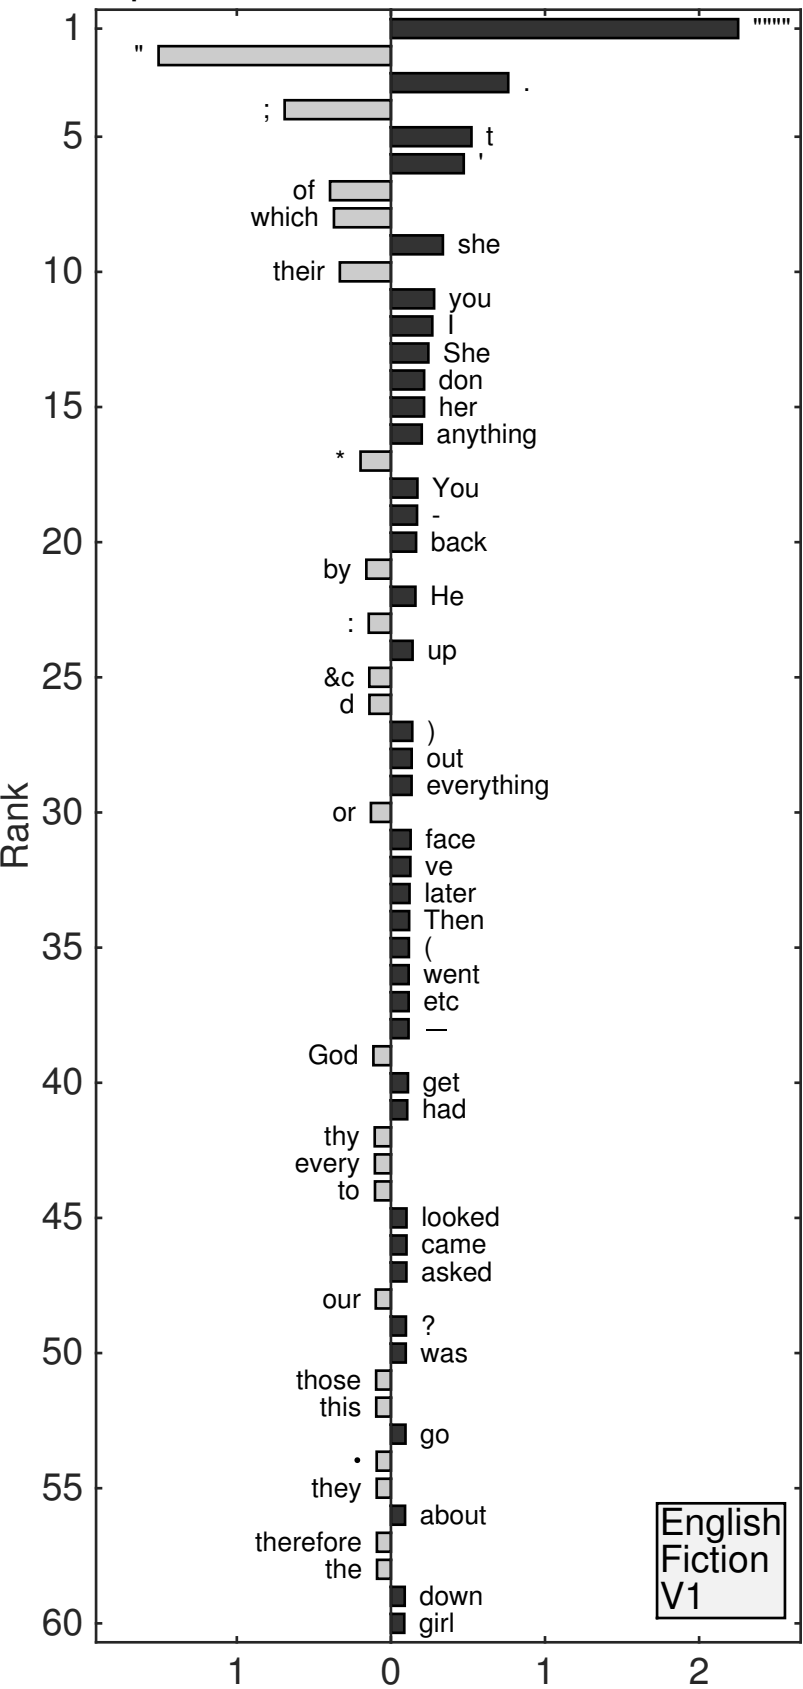

English Fiction V1

Contribution (% of total JSD = 0.0263 bit)

# Top JSD contributions: 1820s to 1910s

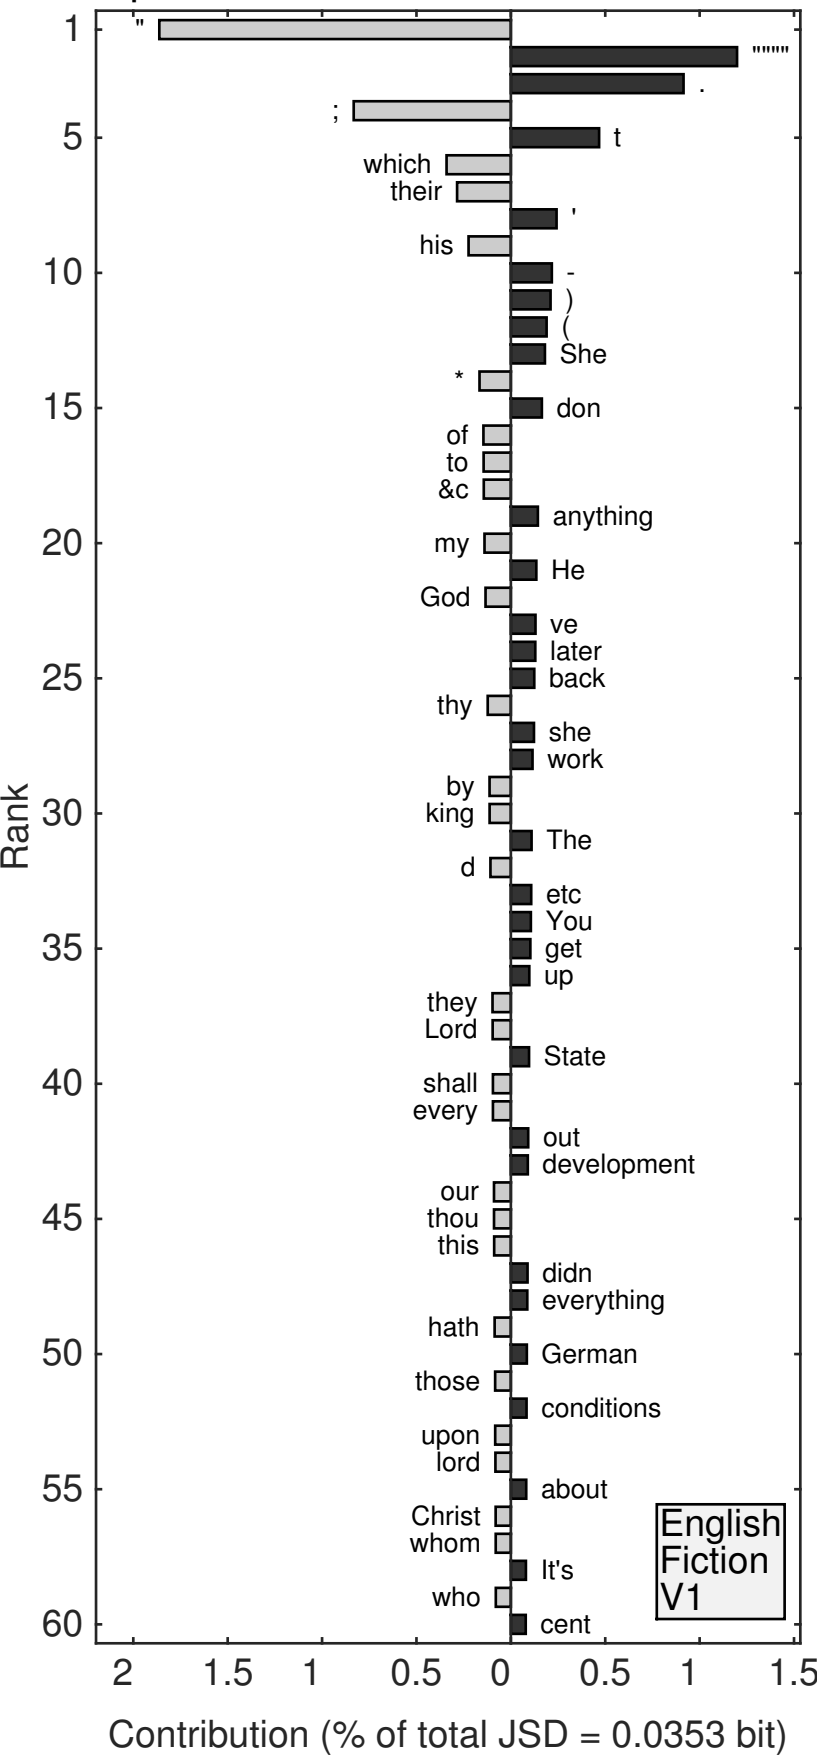

English Fiction V1

# Top JSD contributions: 1820s to 1920s

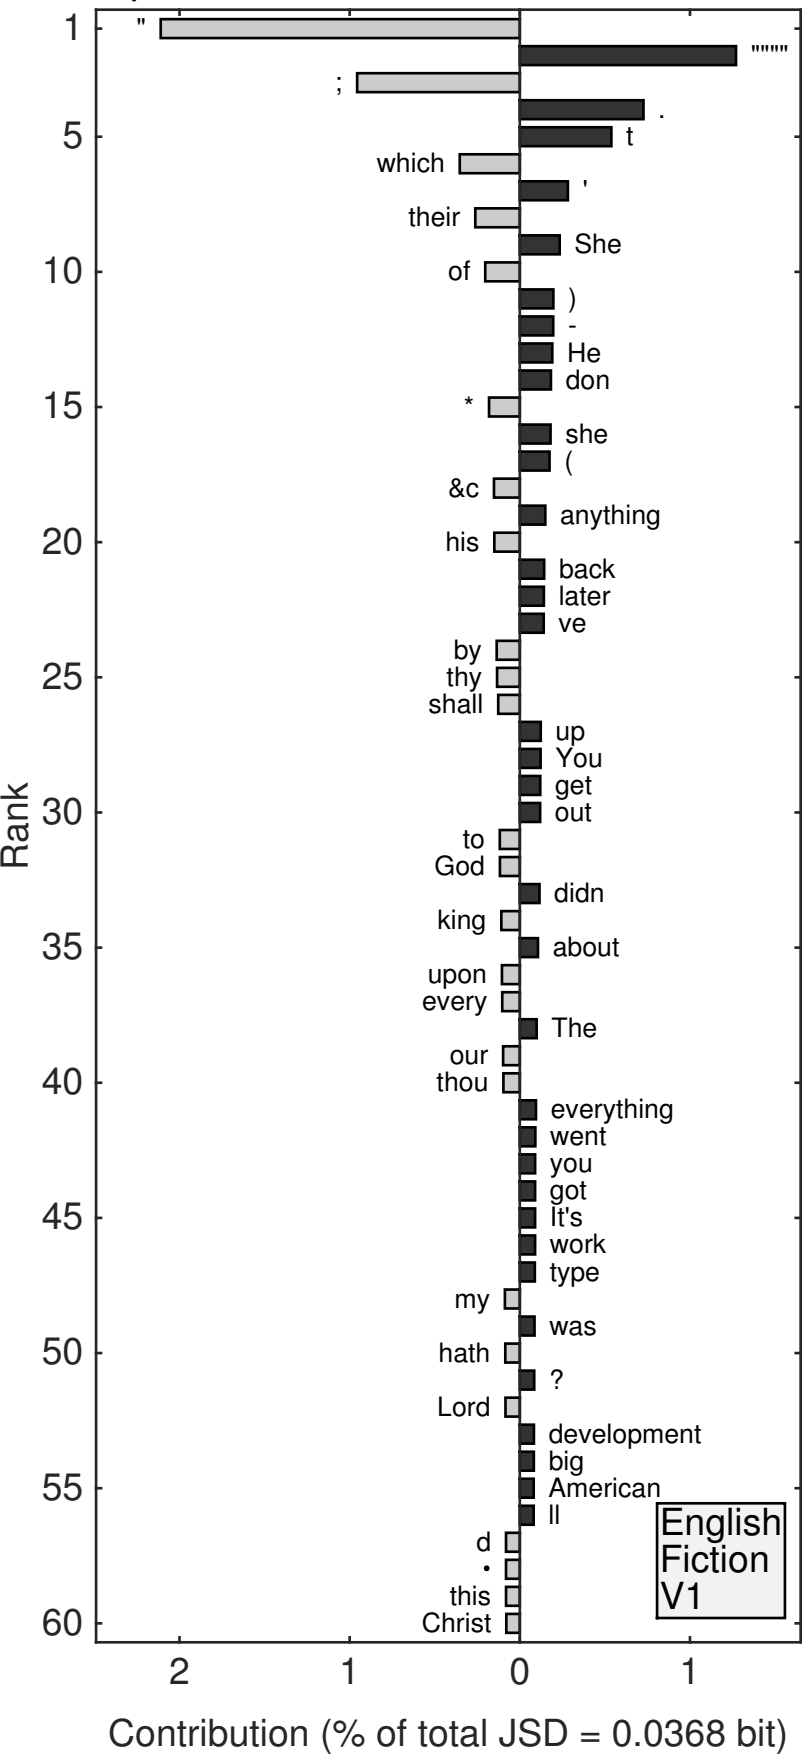

# Top JSD contributions: 1820s to 1930s

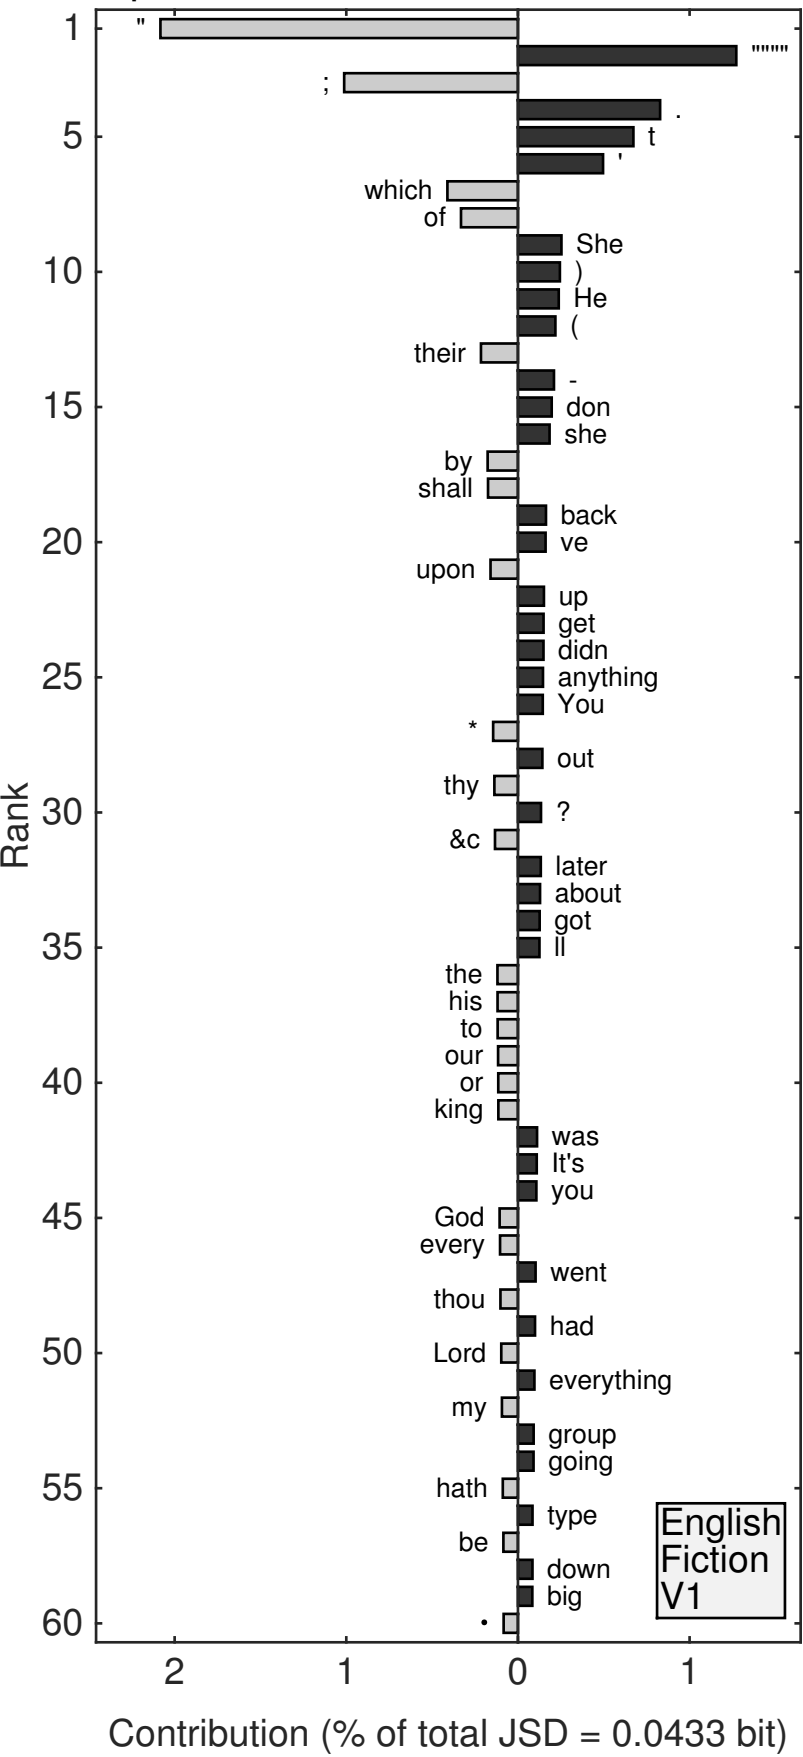



# Top JSD contributions: 1820s to 1940s

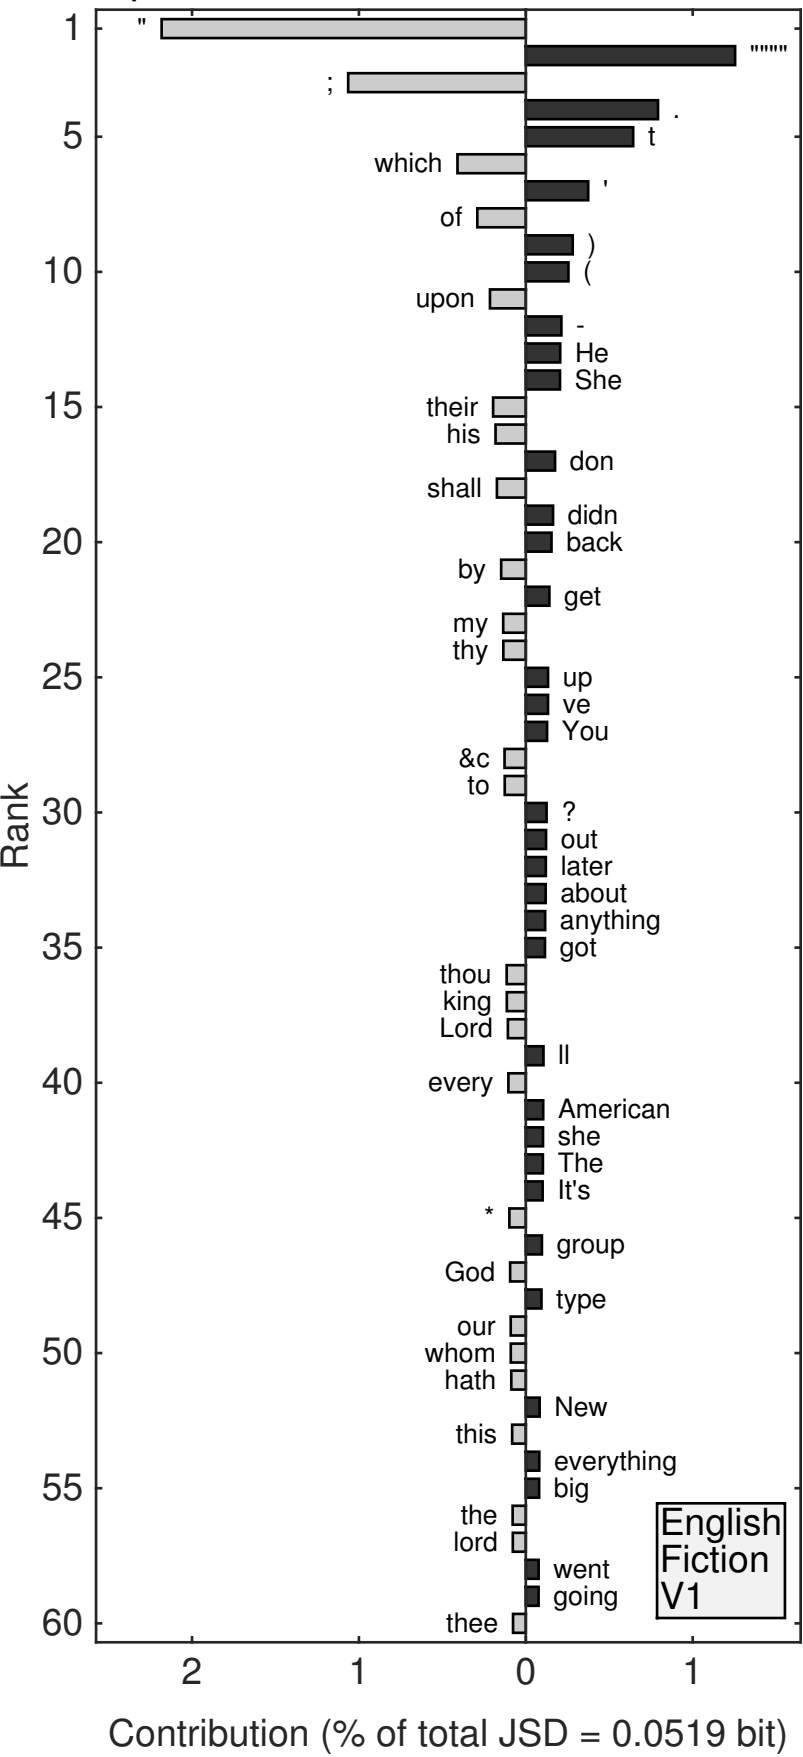

# Top JSD contributions: 1820s to 1950s

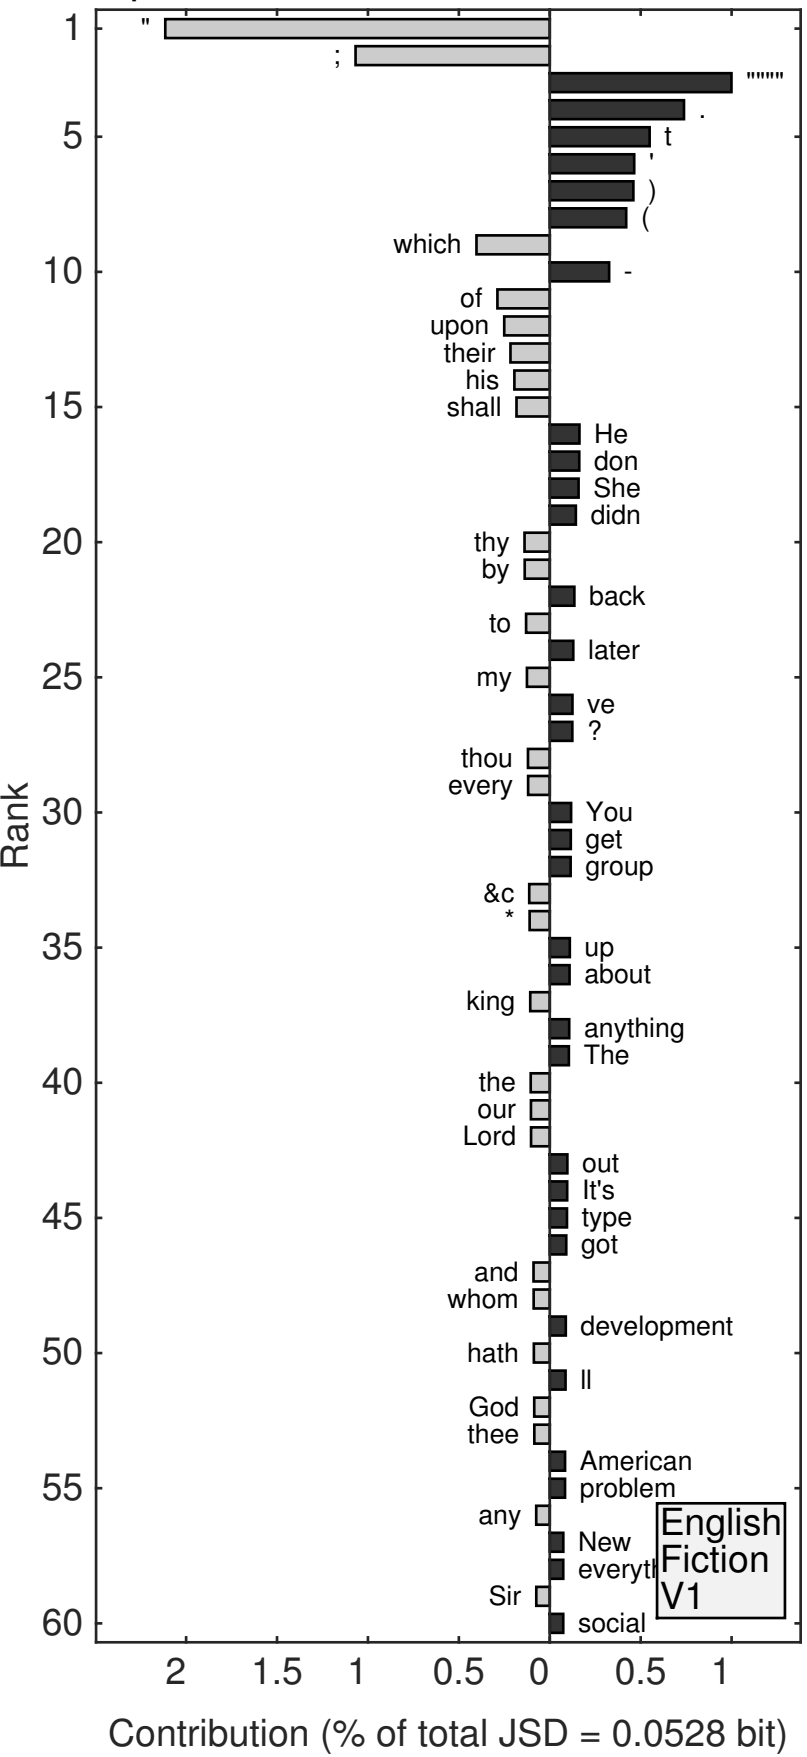

English Fiction V1

# Top JSD contributions: 1820s to 1960s

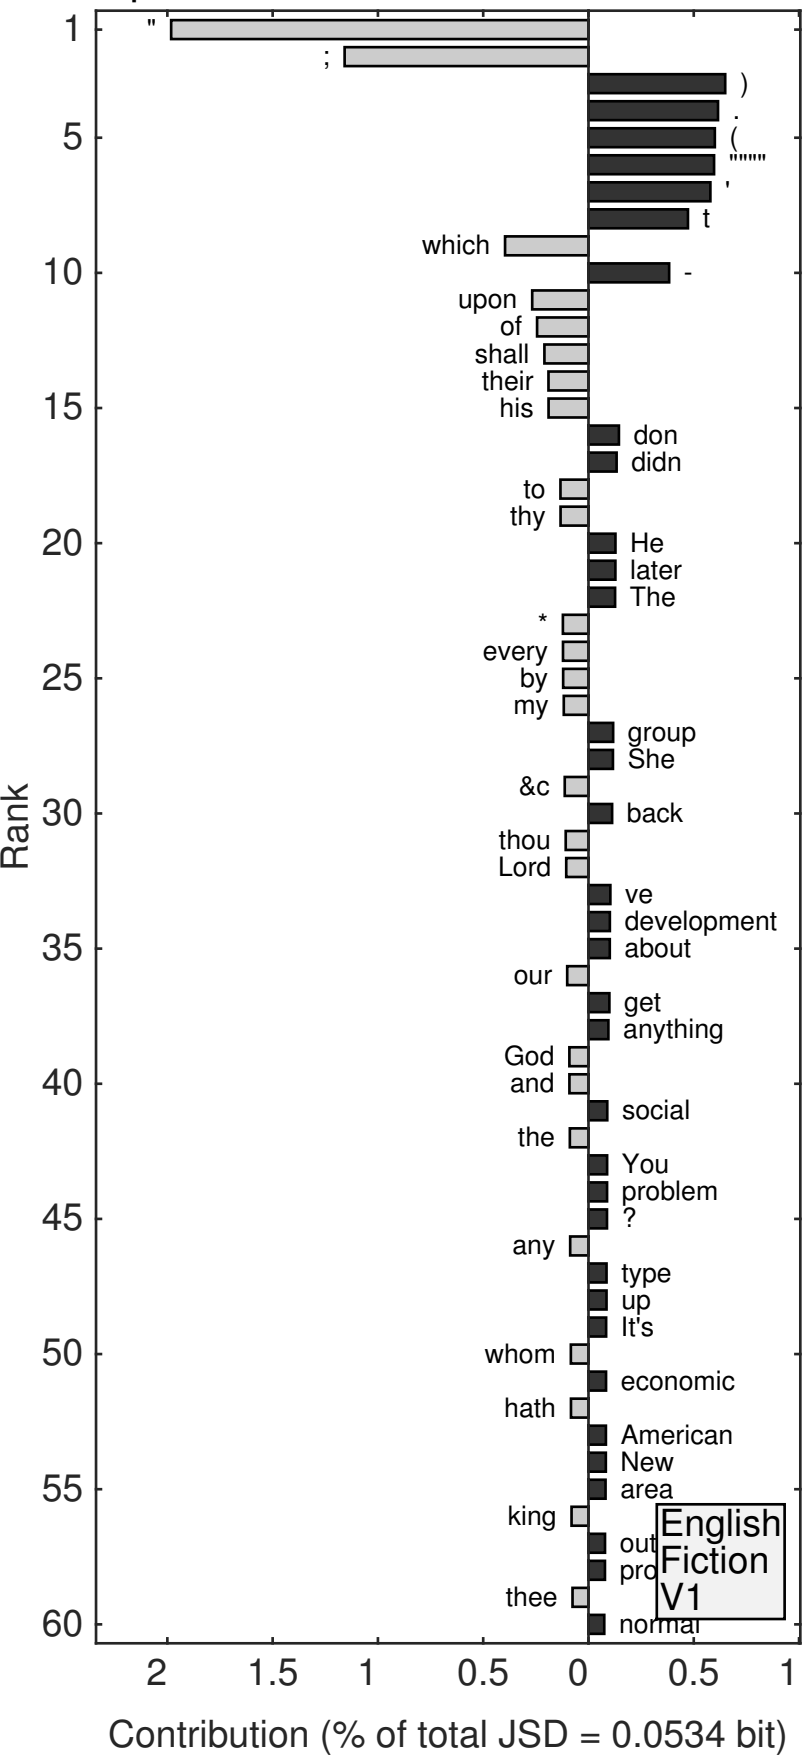

English Fiction V1

# Top JSD contributions: 1820s to 1970s

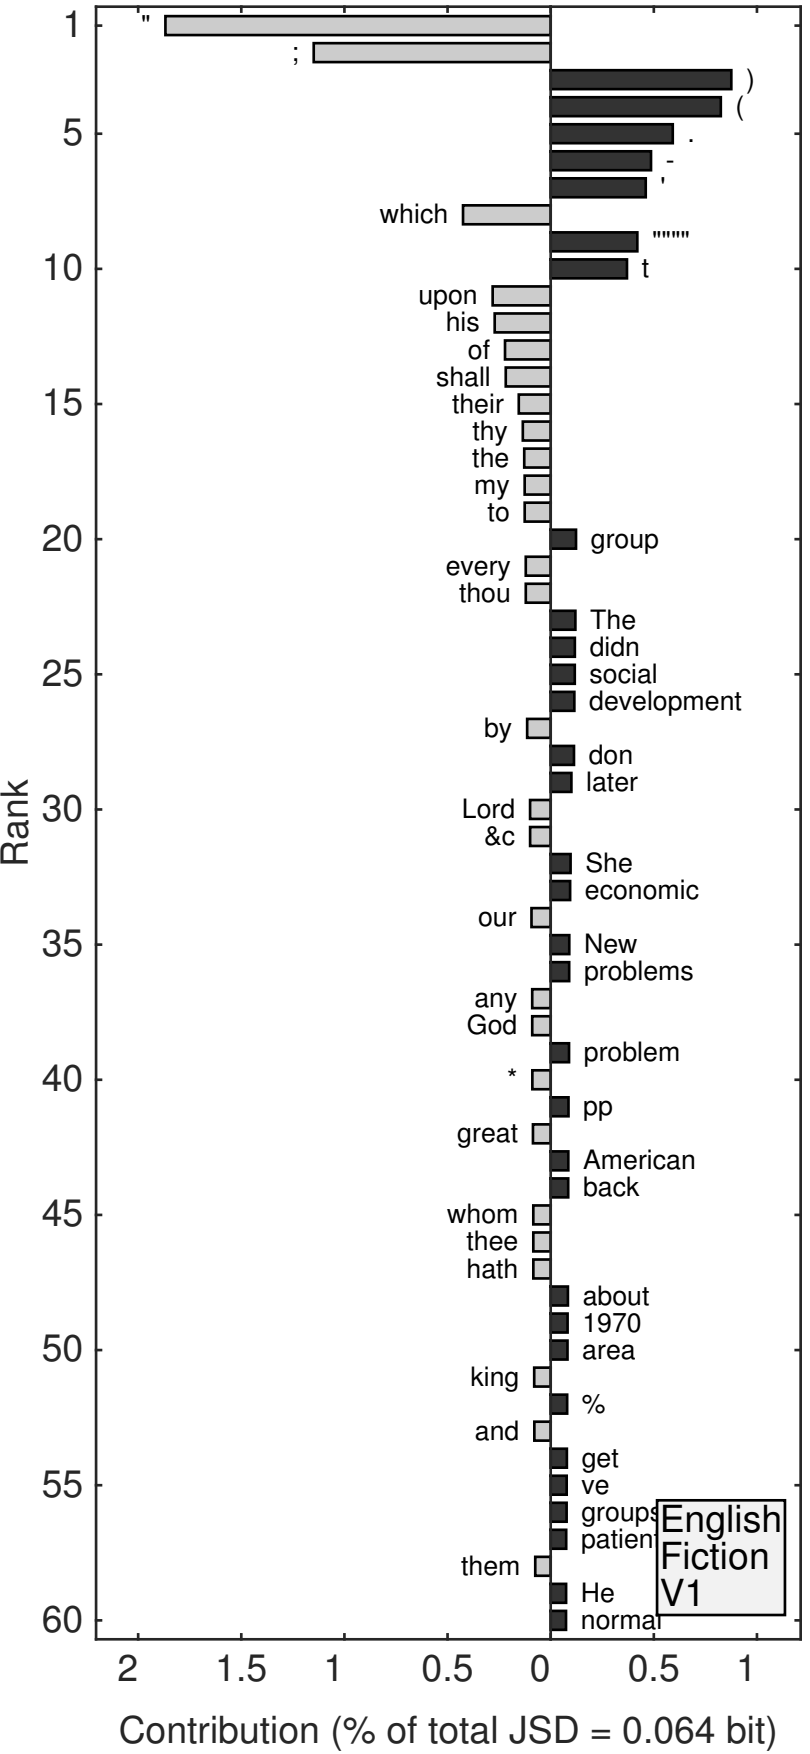

English Fiction V1

# Top JSD contributions: 1820s to 1980s

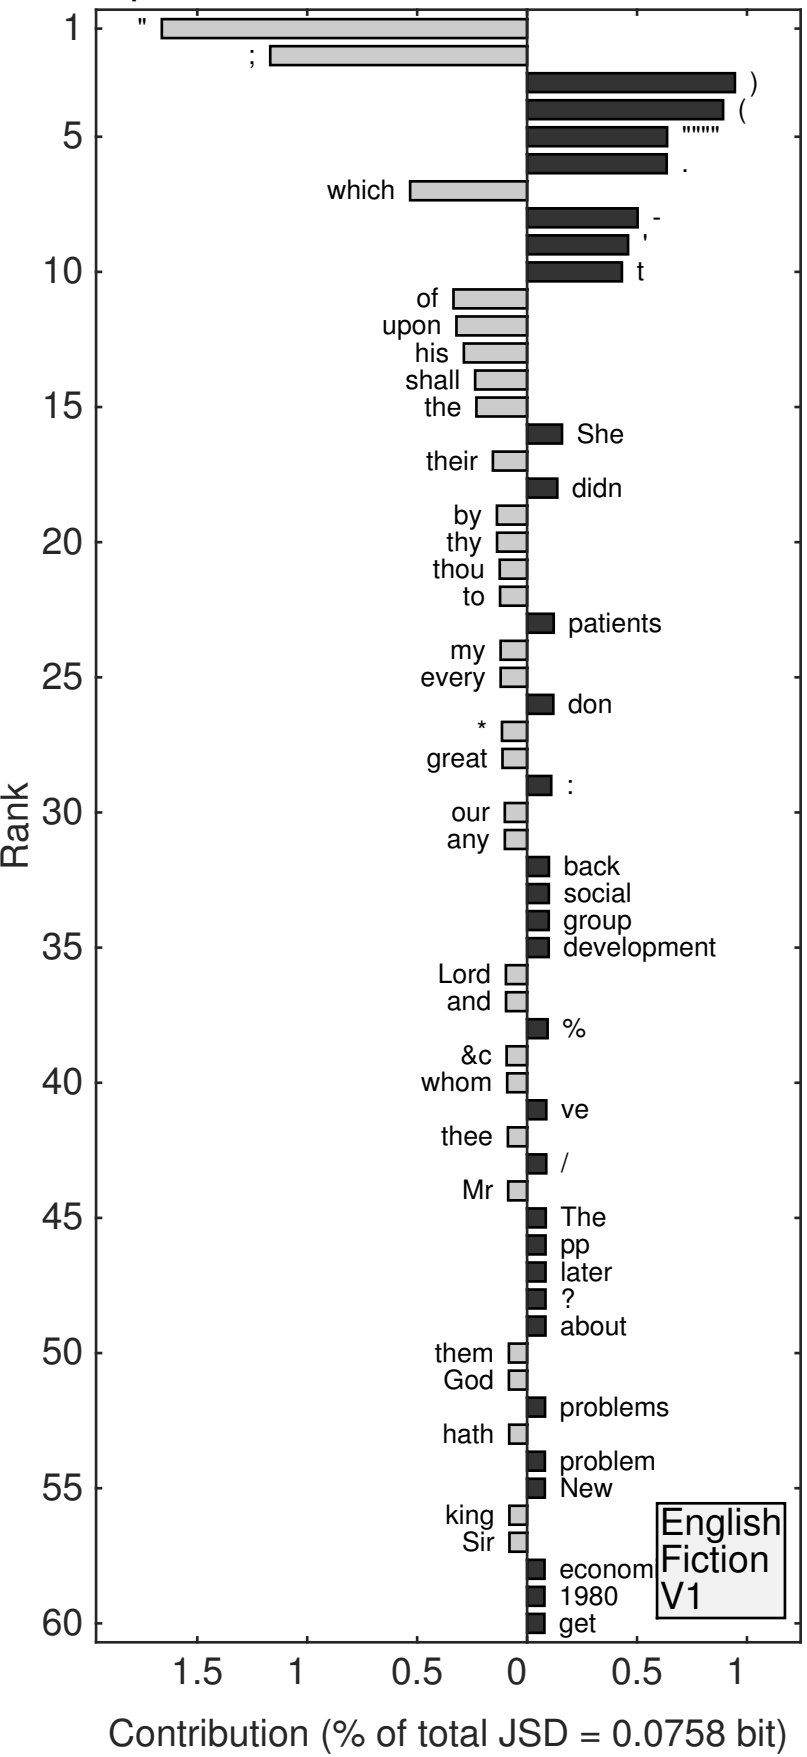

# Top JSD contributions: 1820s to 1990s

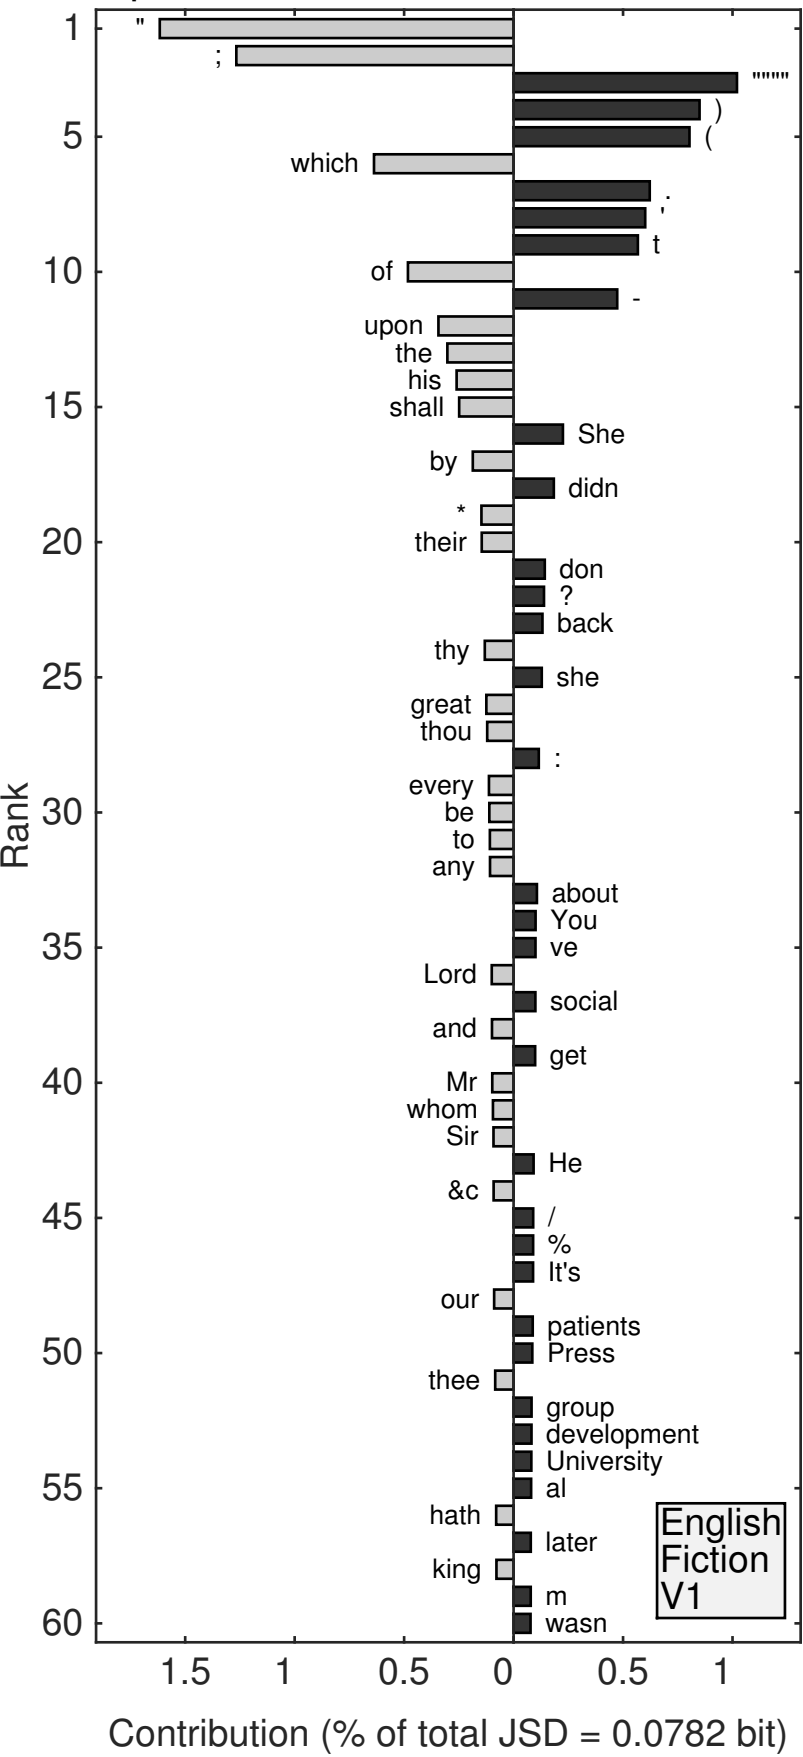

# Top JSD contributions: 1830s to 1840s

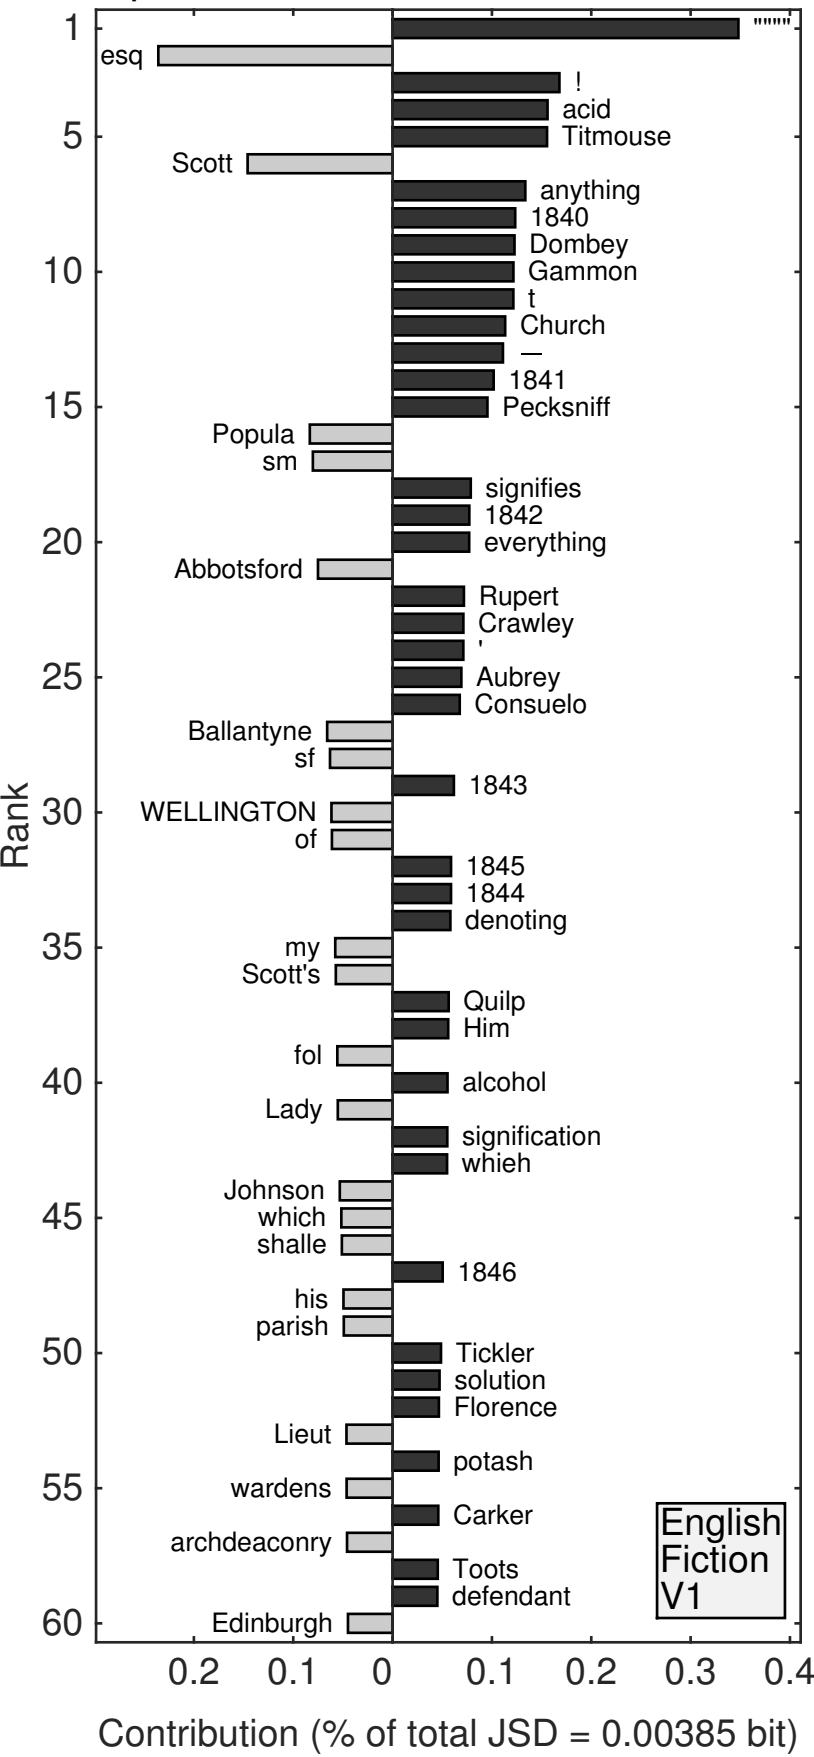

# Top JSD contributions: 1830s to 1850s

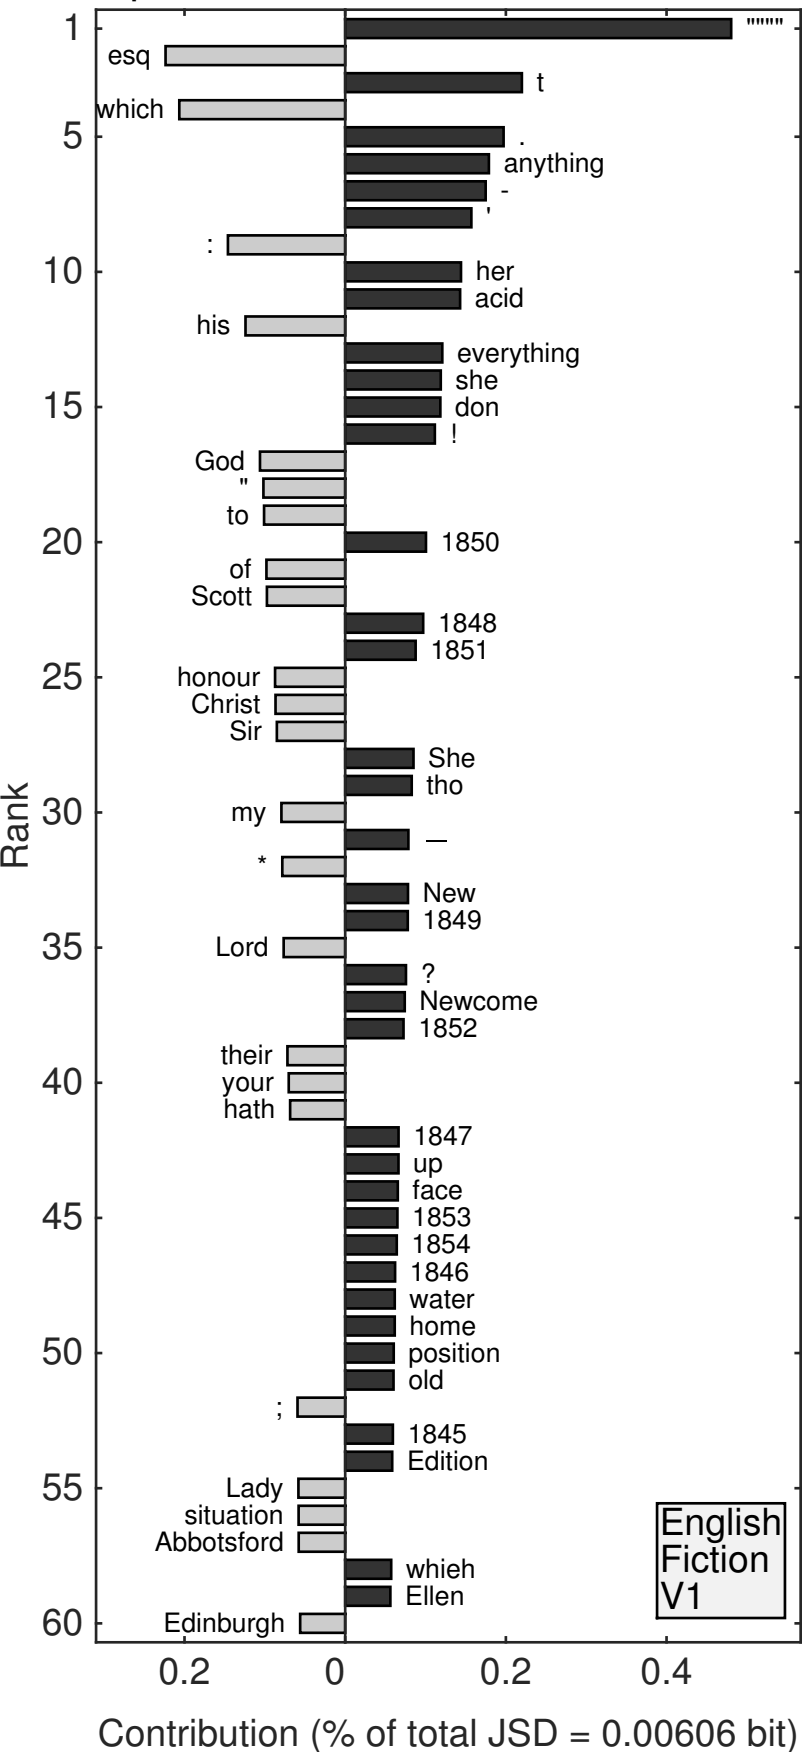



# Top JSD contributions: 1830s to 1860s

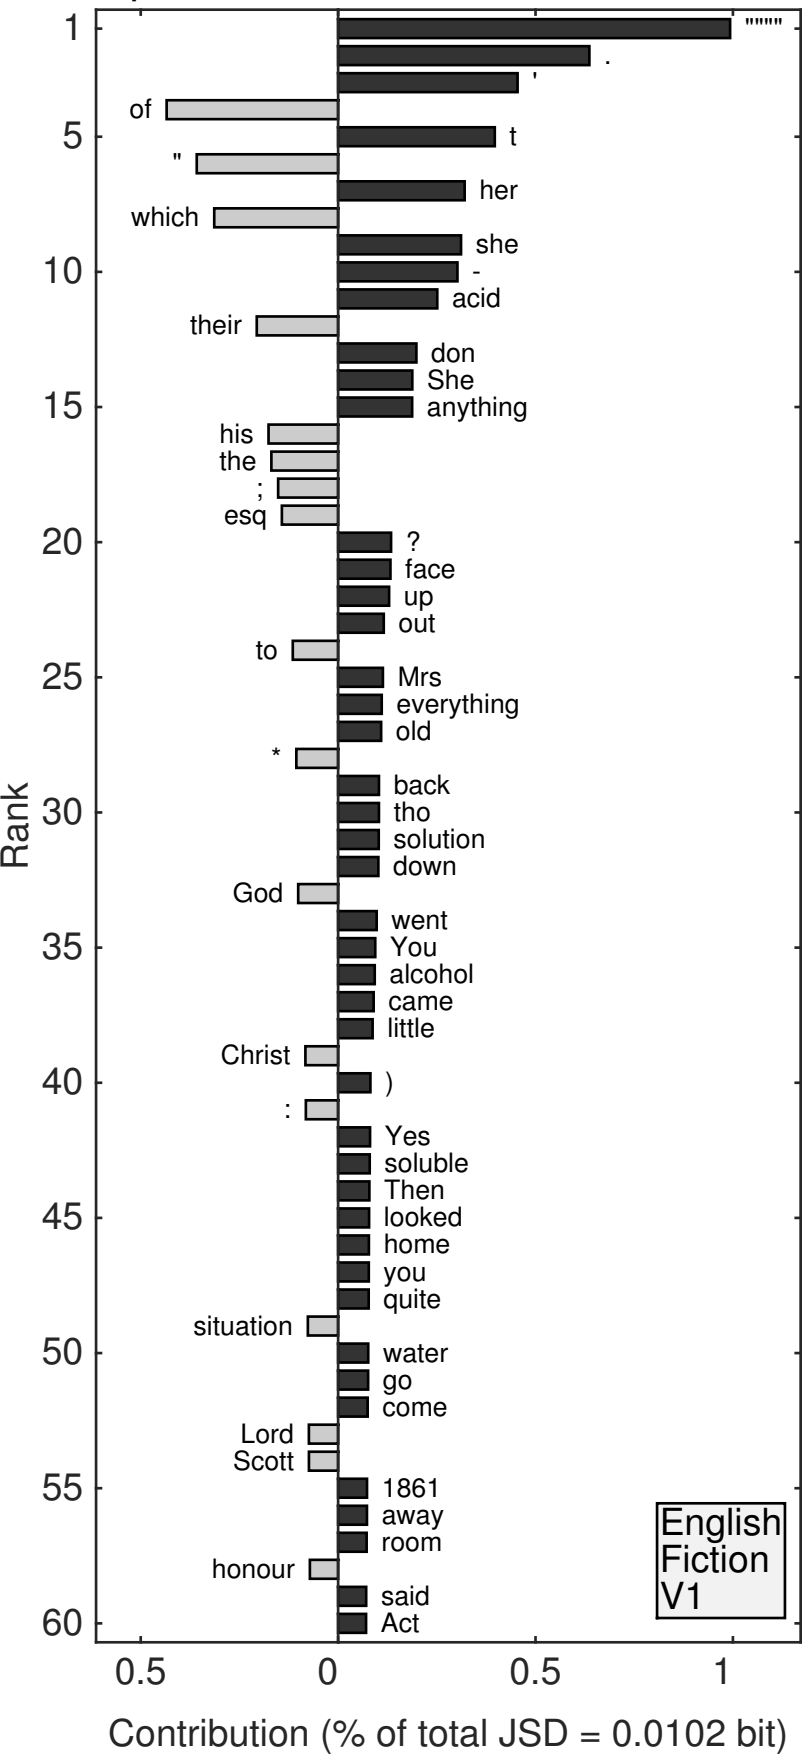

# Top JSD contributions: 1830s to 1870s

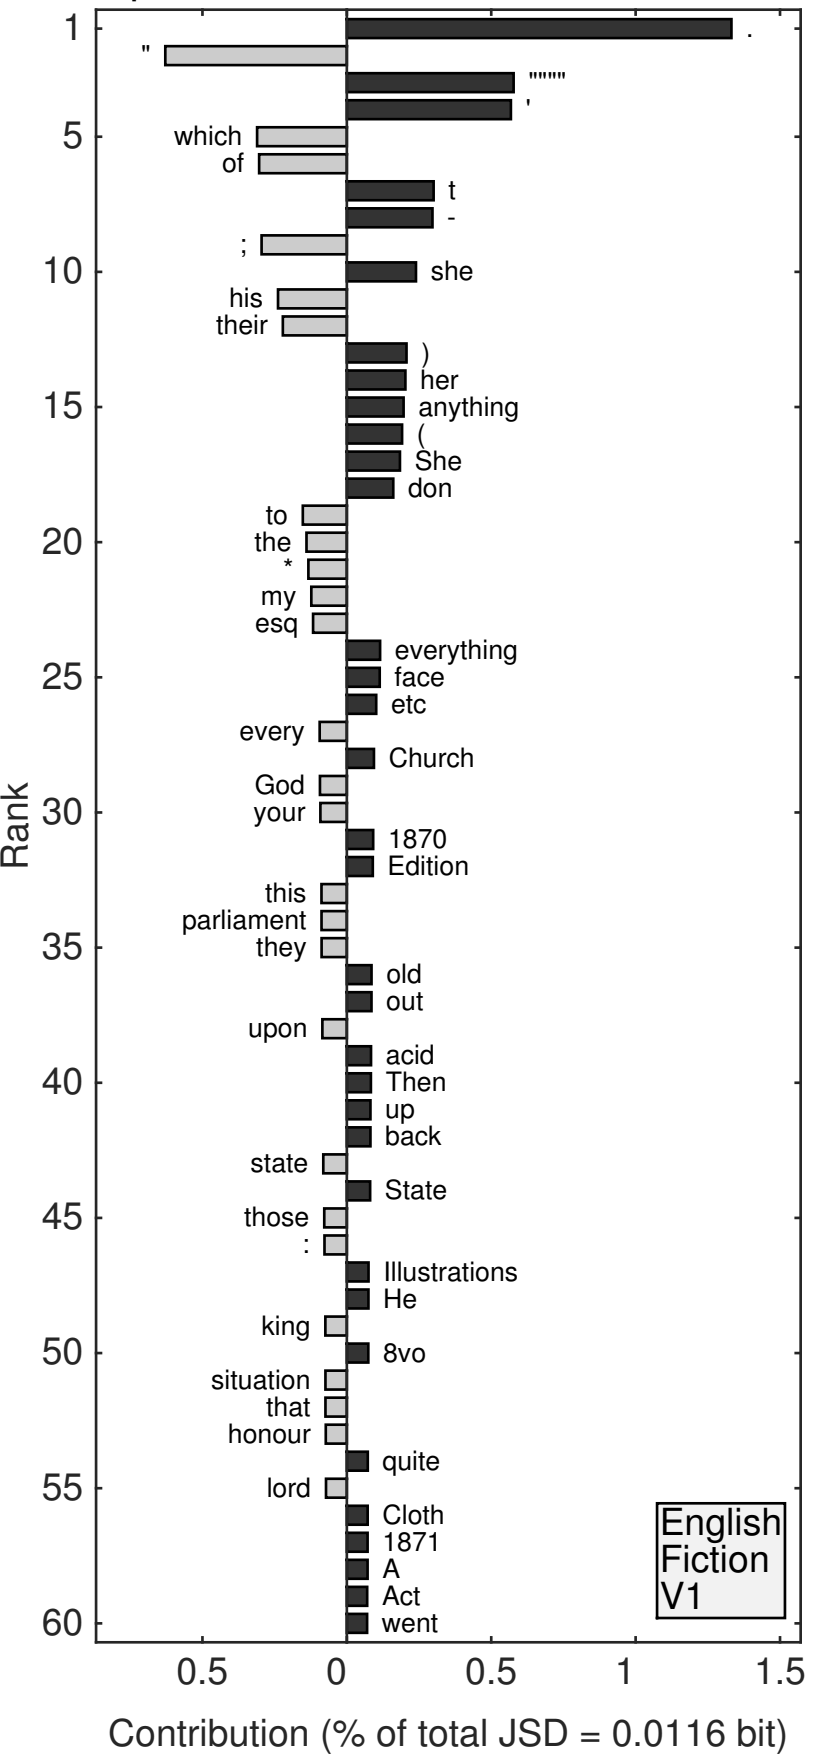

# Top JSD contributions: 1830s to 1880s

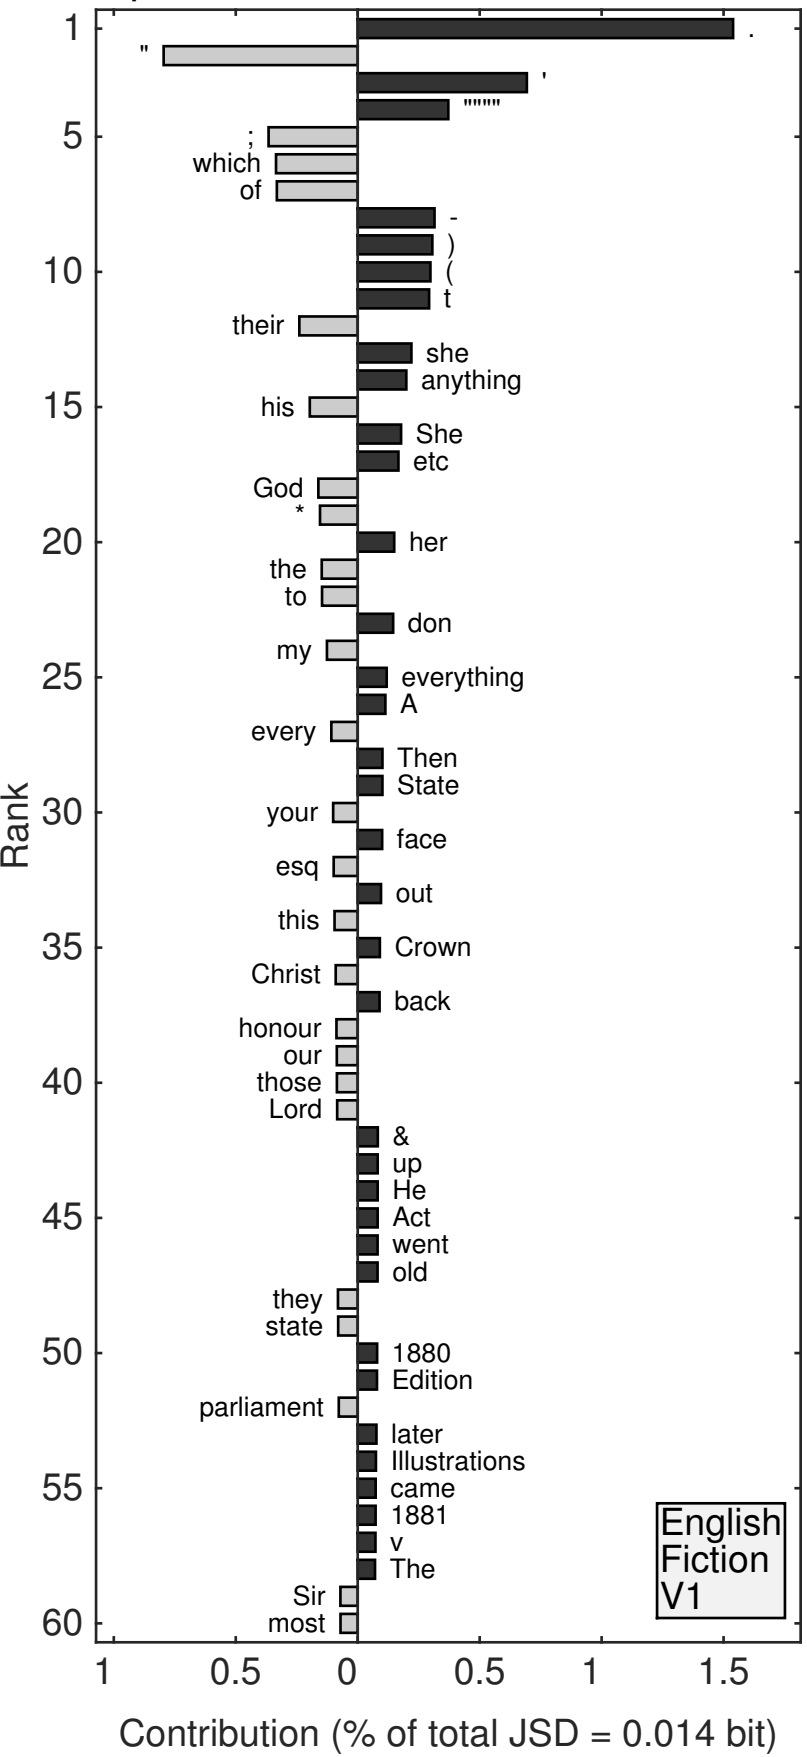

# Top JSD contributions: 1830s to 1890s

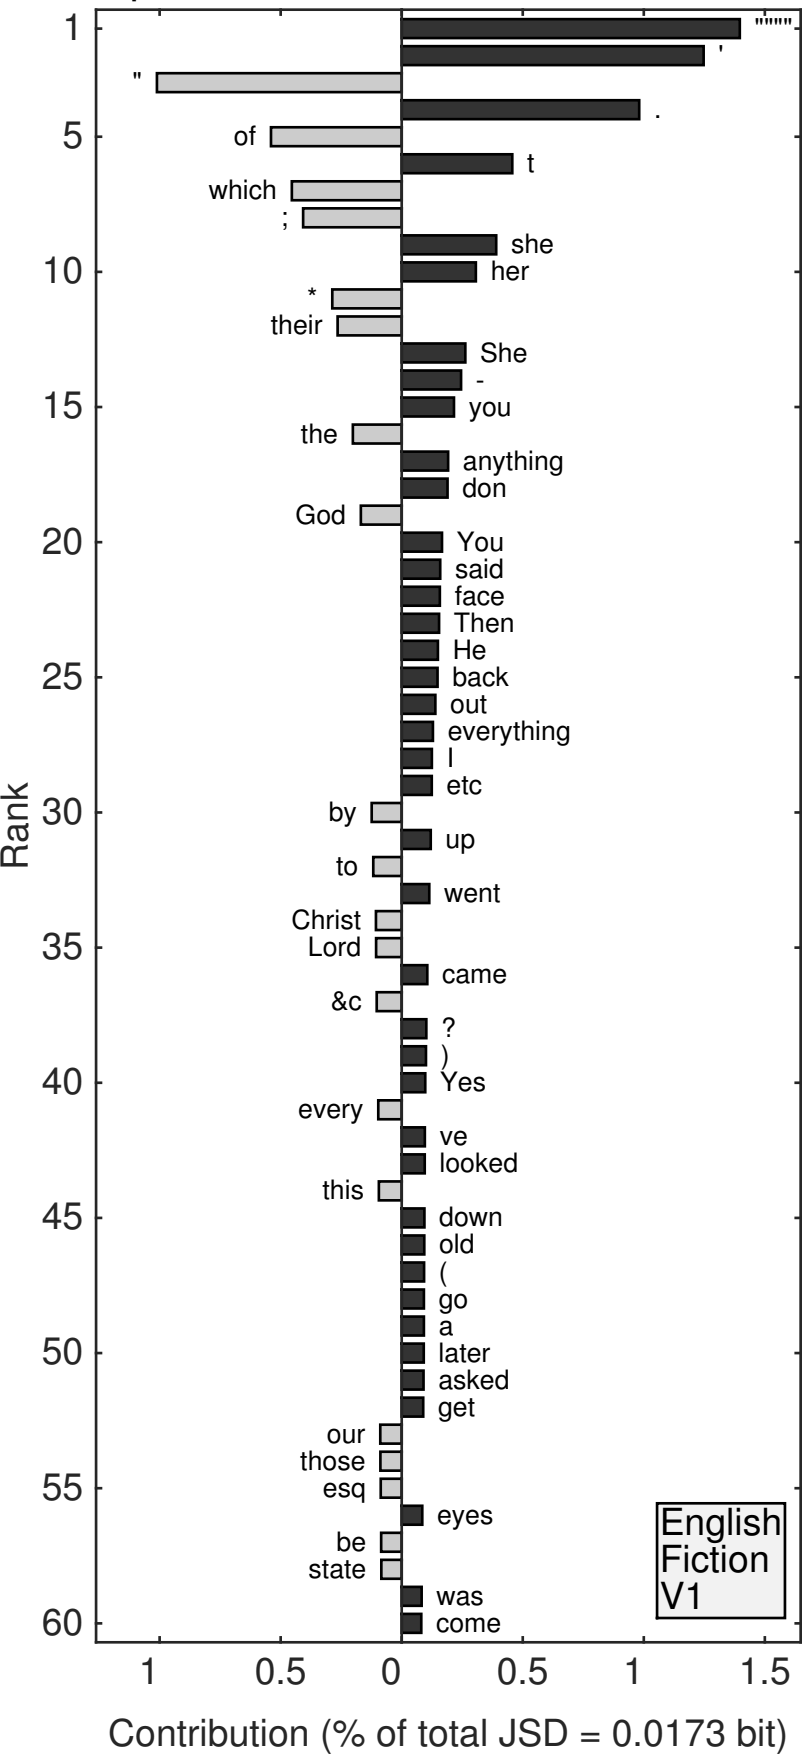

# Top JSD contributions: 1830s to 1900s

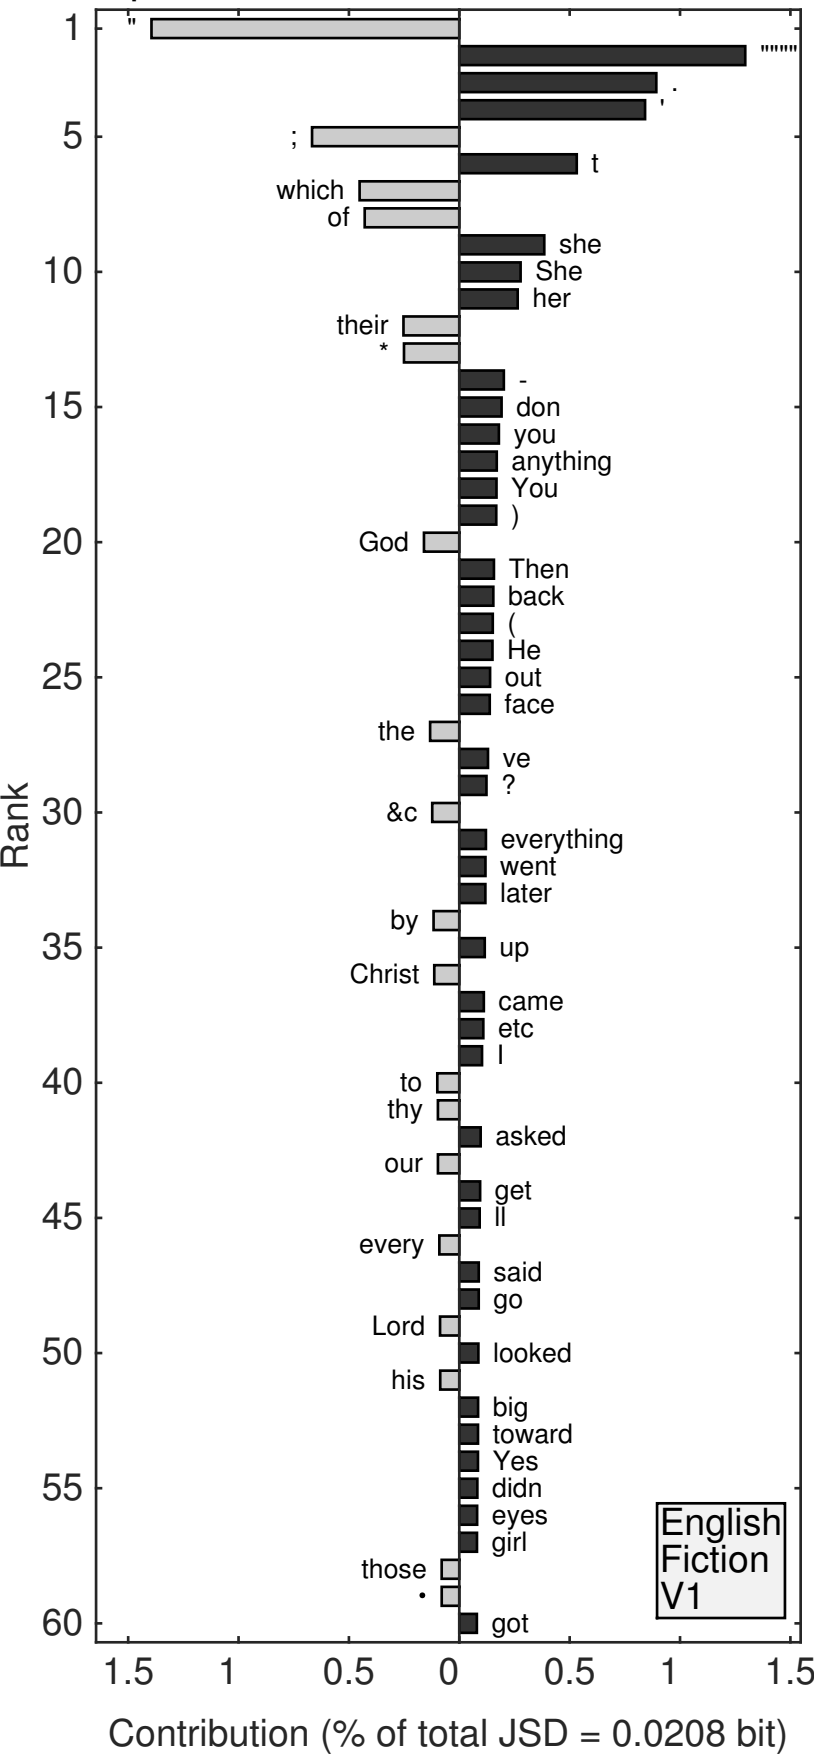

# Top JSD contributions: 1830s to 1910s

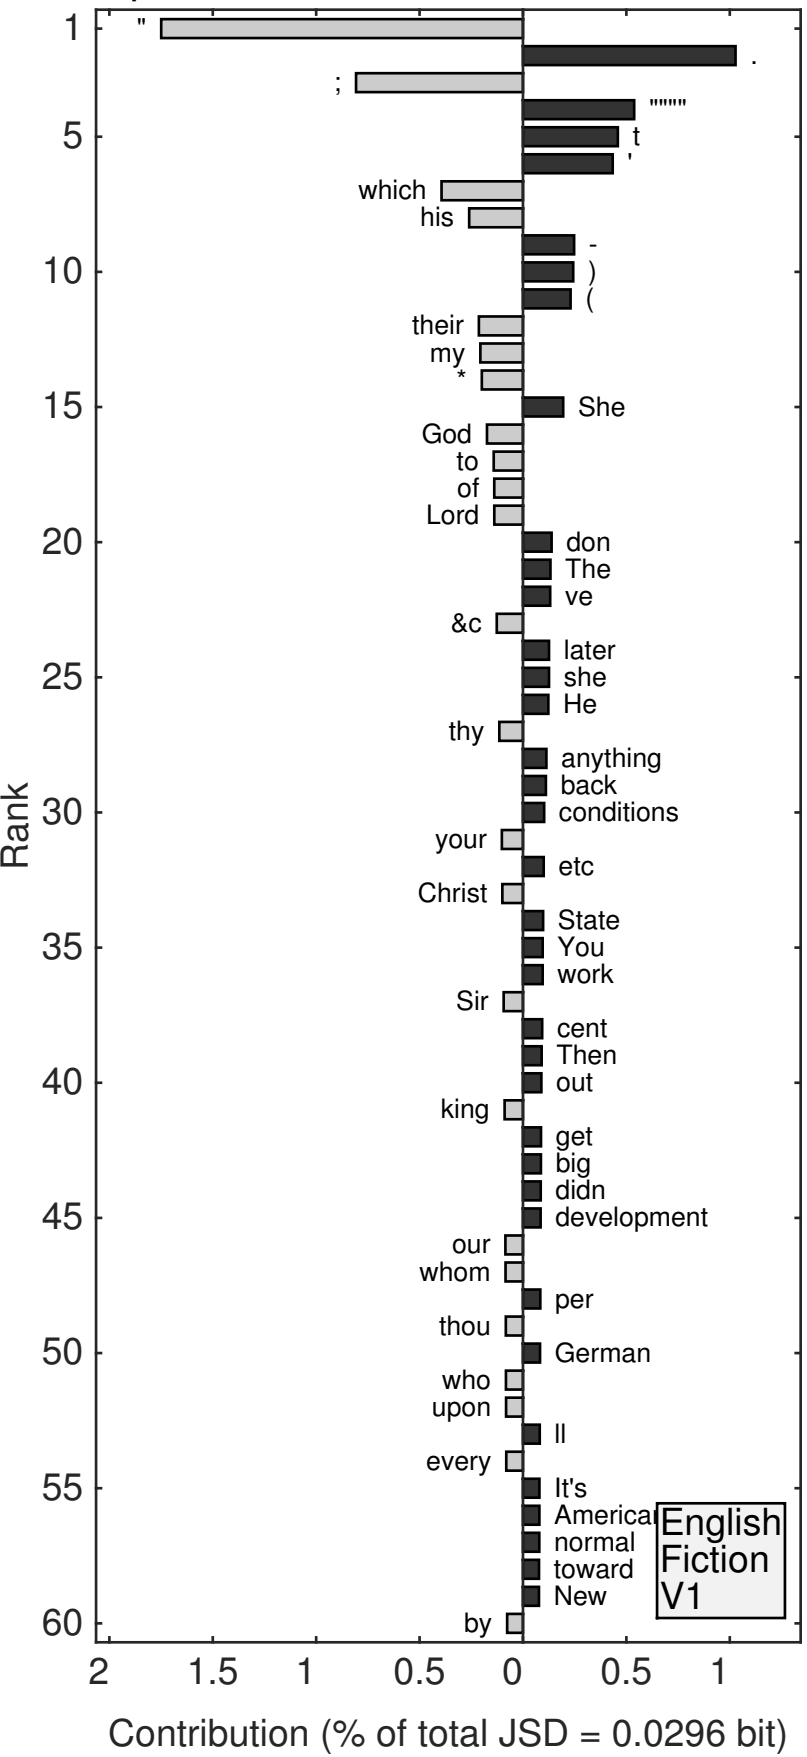

# Top JSD contributions: 1830s to 1920s

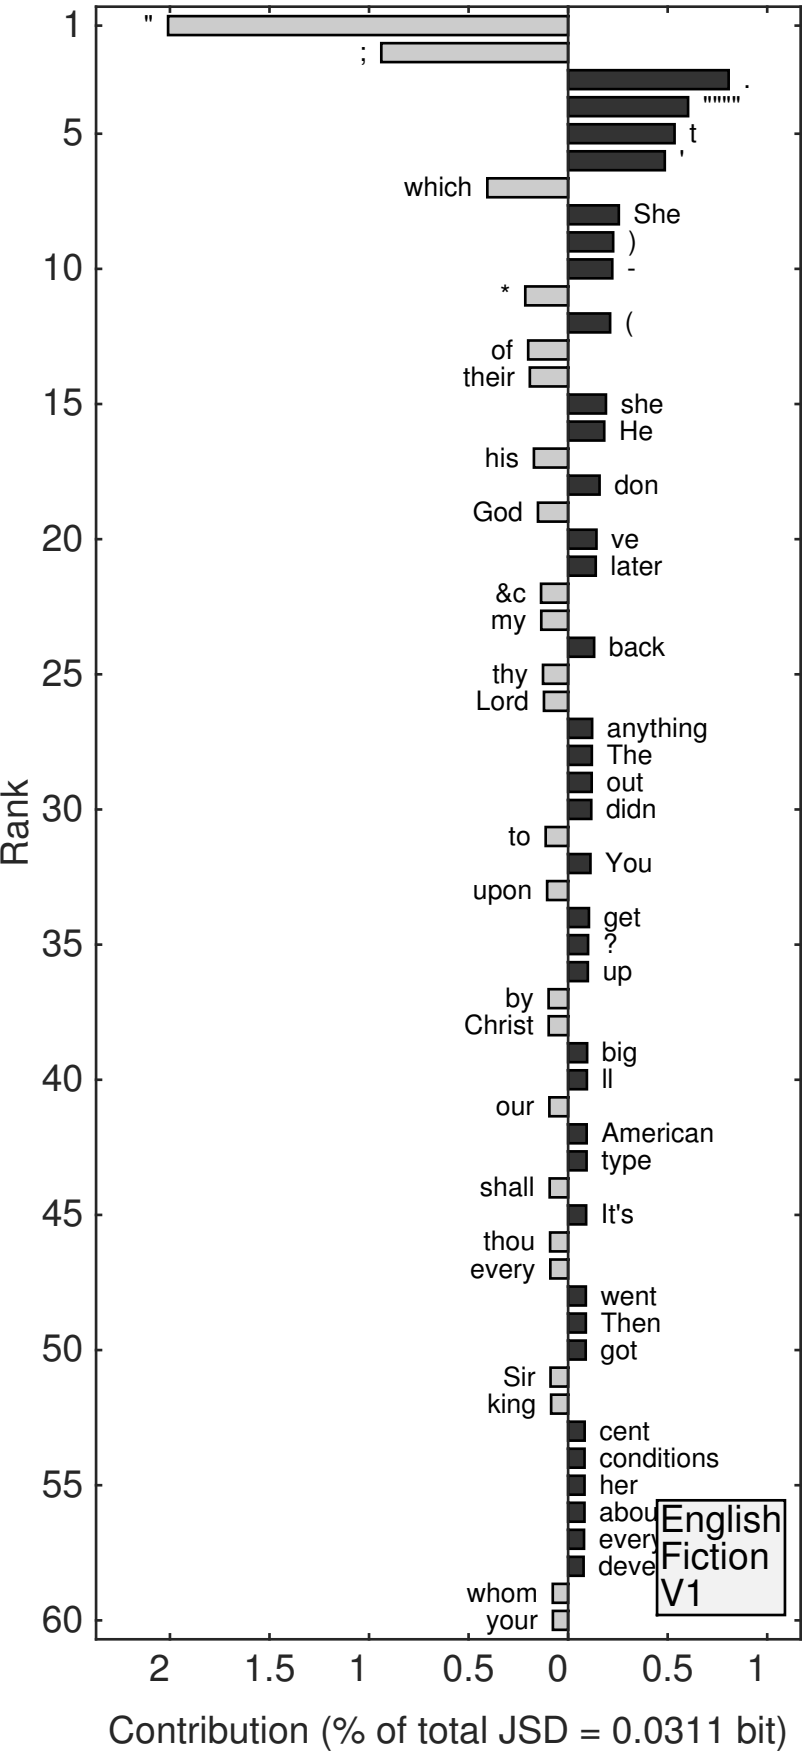

English Fiction V1

# Top JSD contributions: 1830s to 1930s

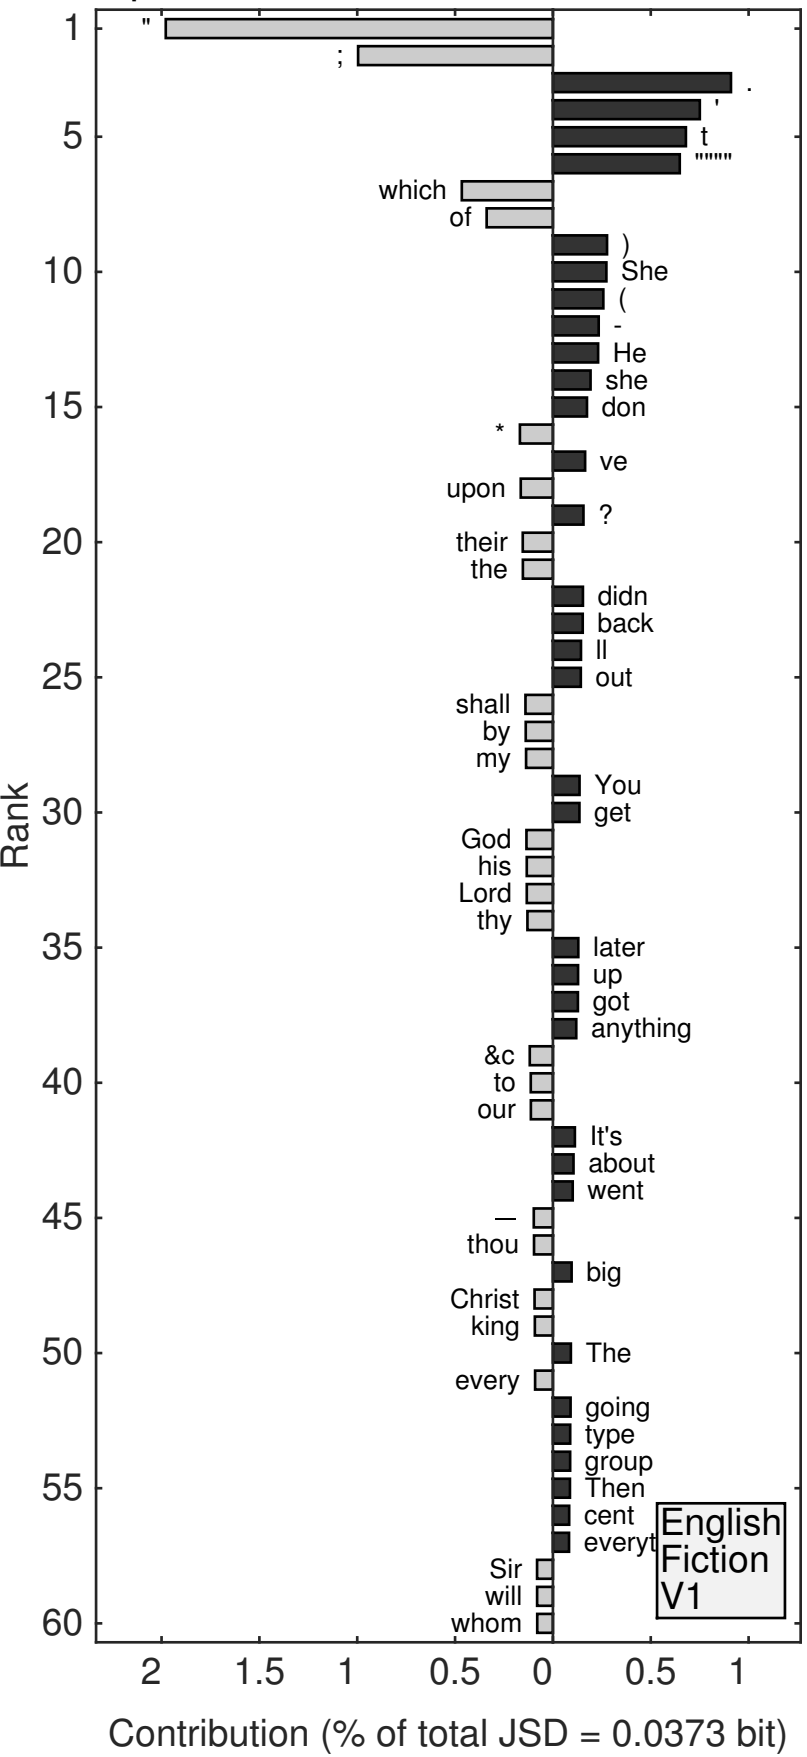



# Top JSD contributions: 1830s to 1940s

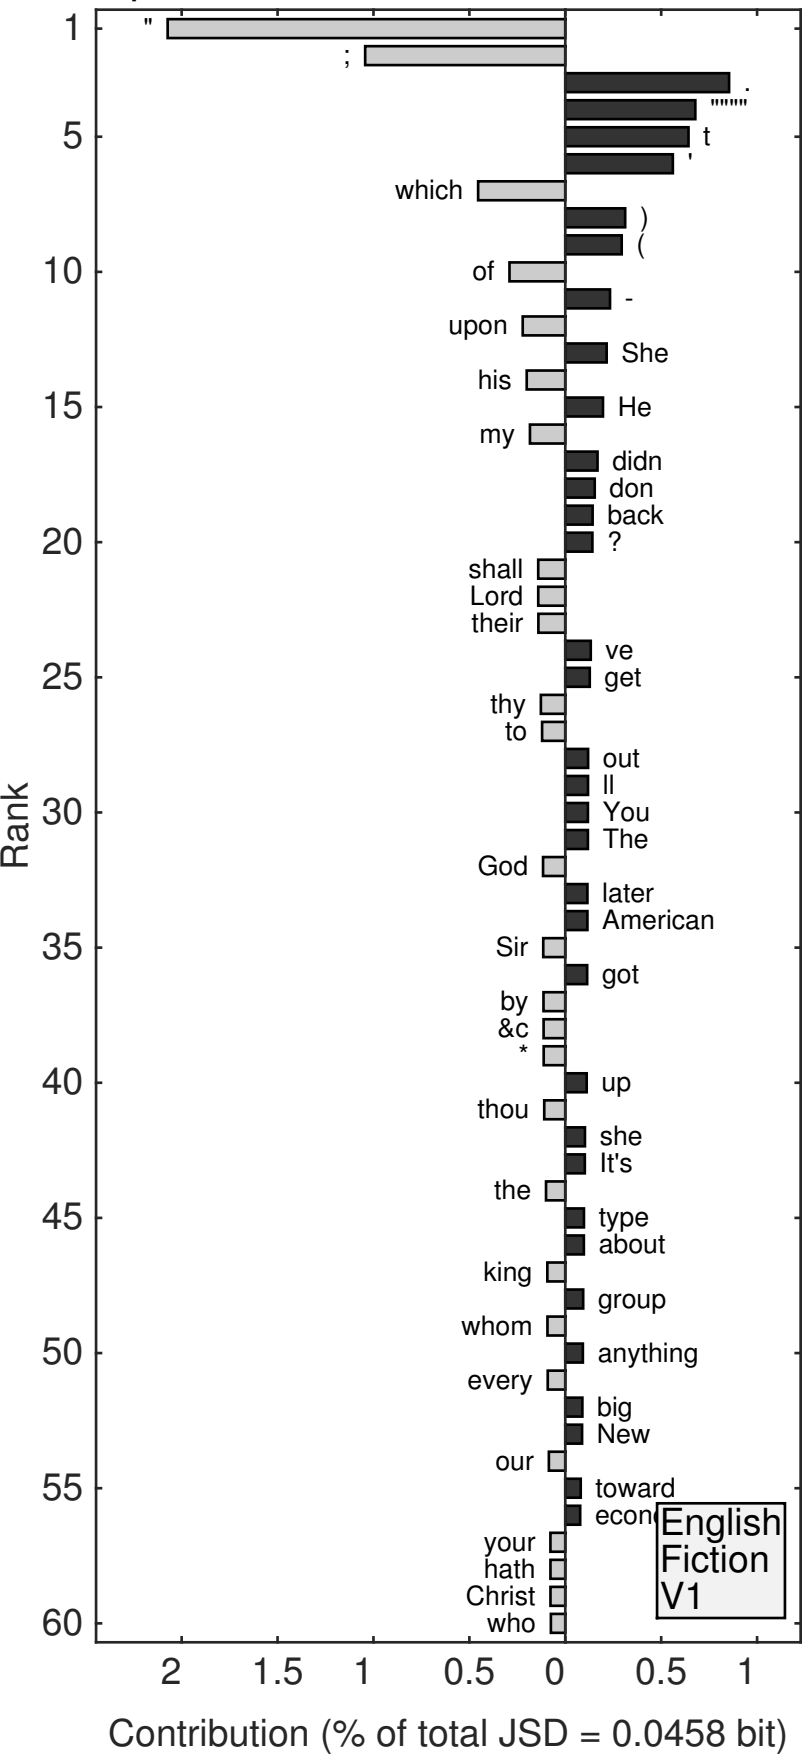

# Top JSD contributions: 1830s to 1950s

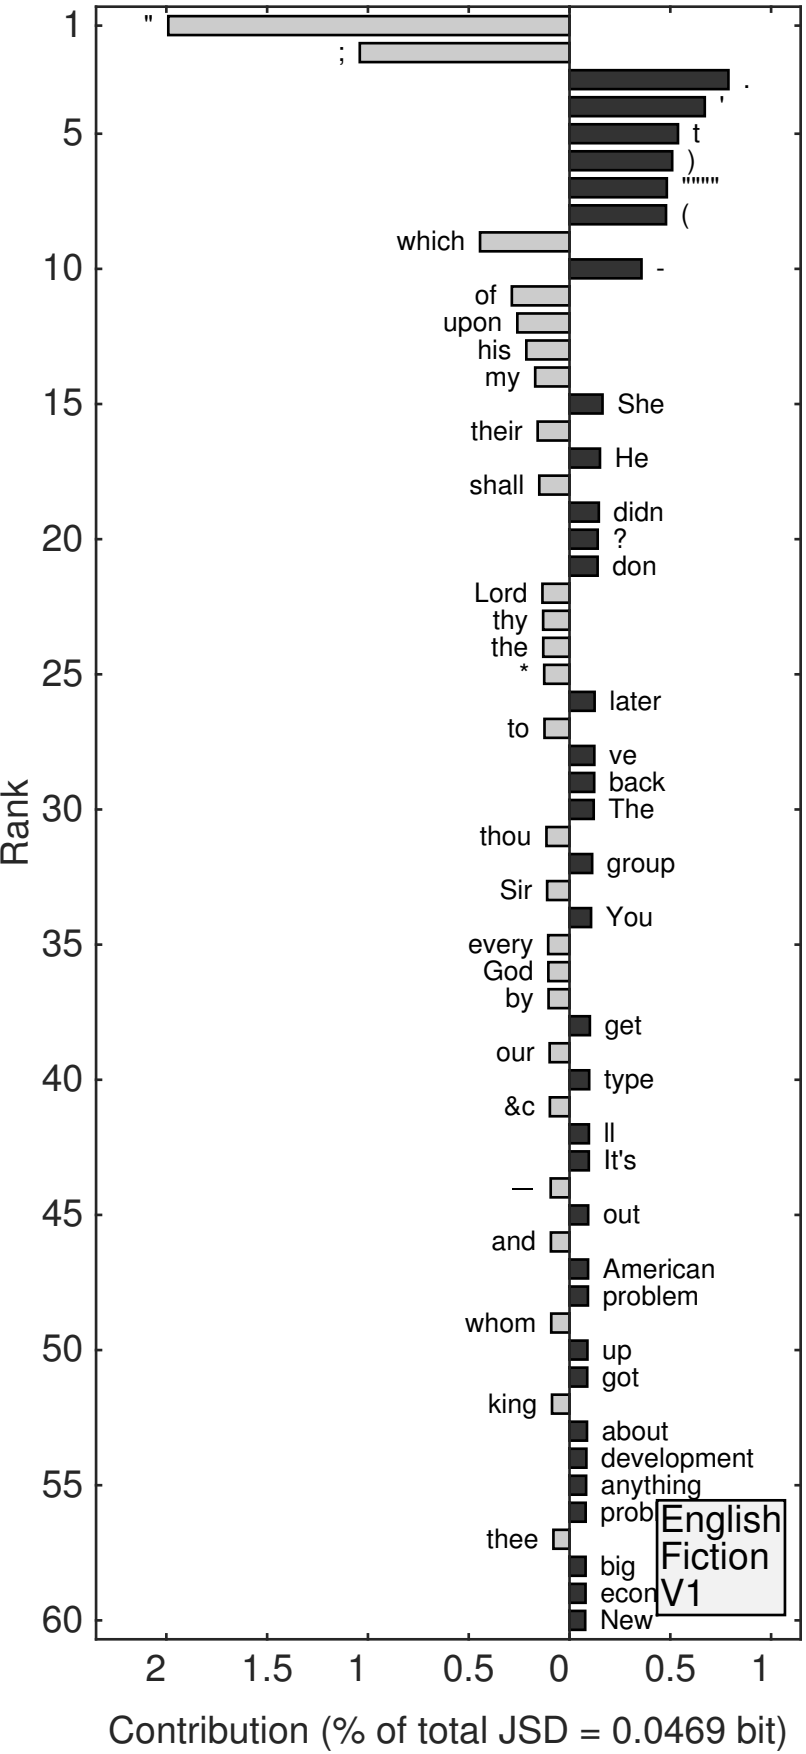

English Fiction V1

# Top JSD contributions: 1830s to 1960s

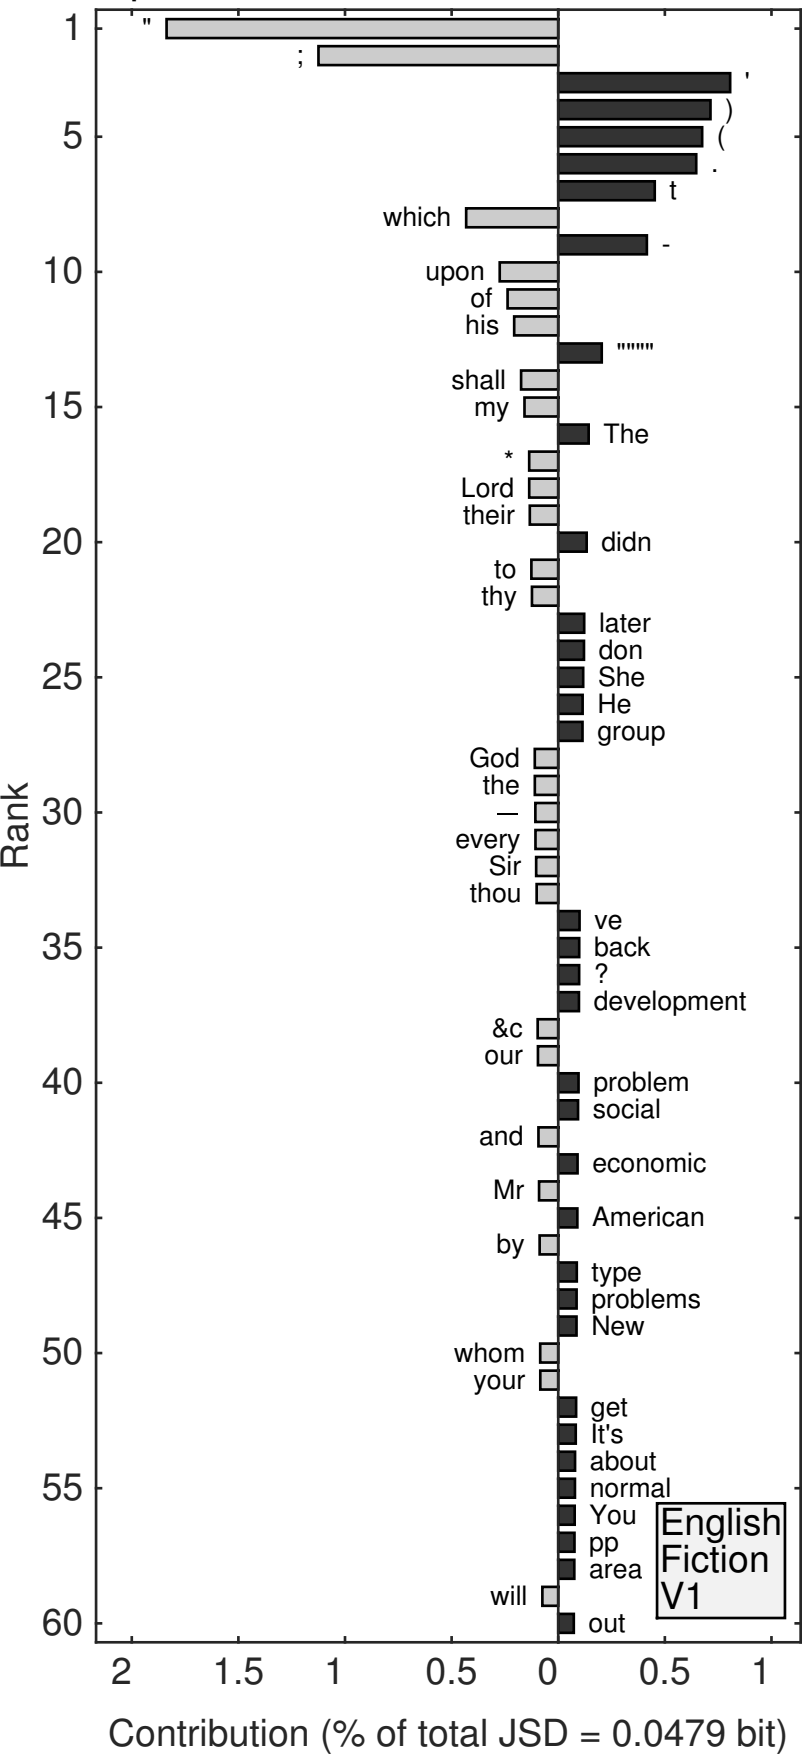

English Fiction V1

# Top JSD contributions: 1830s to 1970s

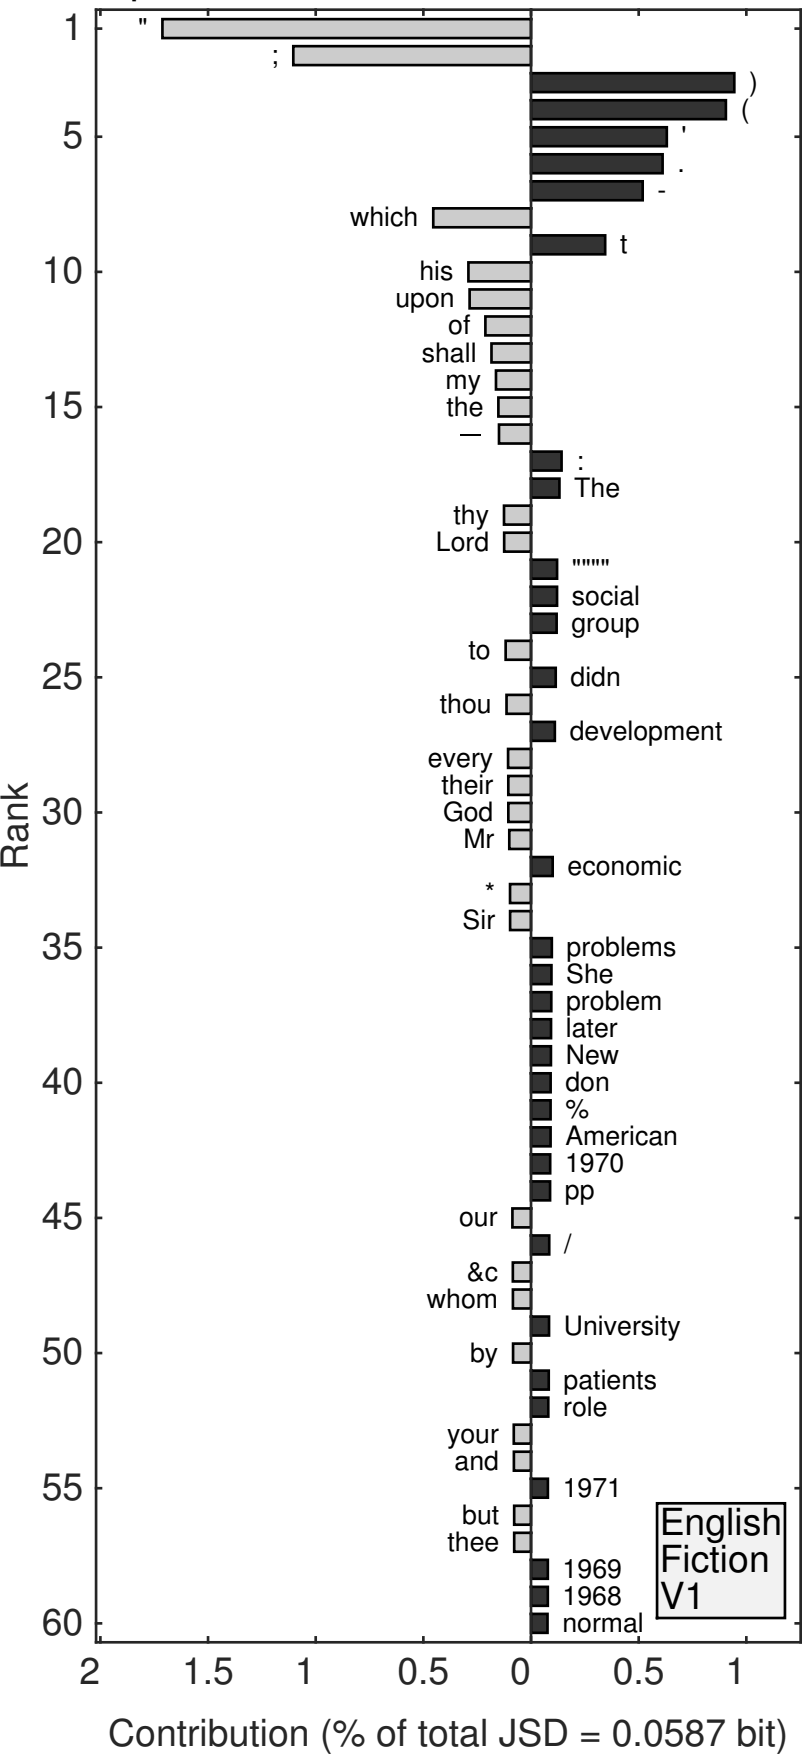

# Top JSD contributions: 1830s to 1980s

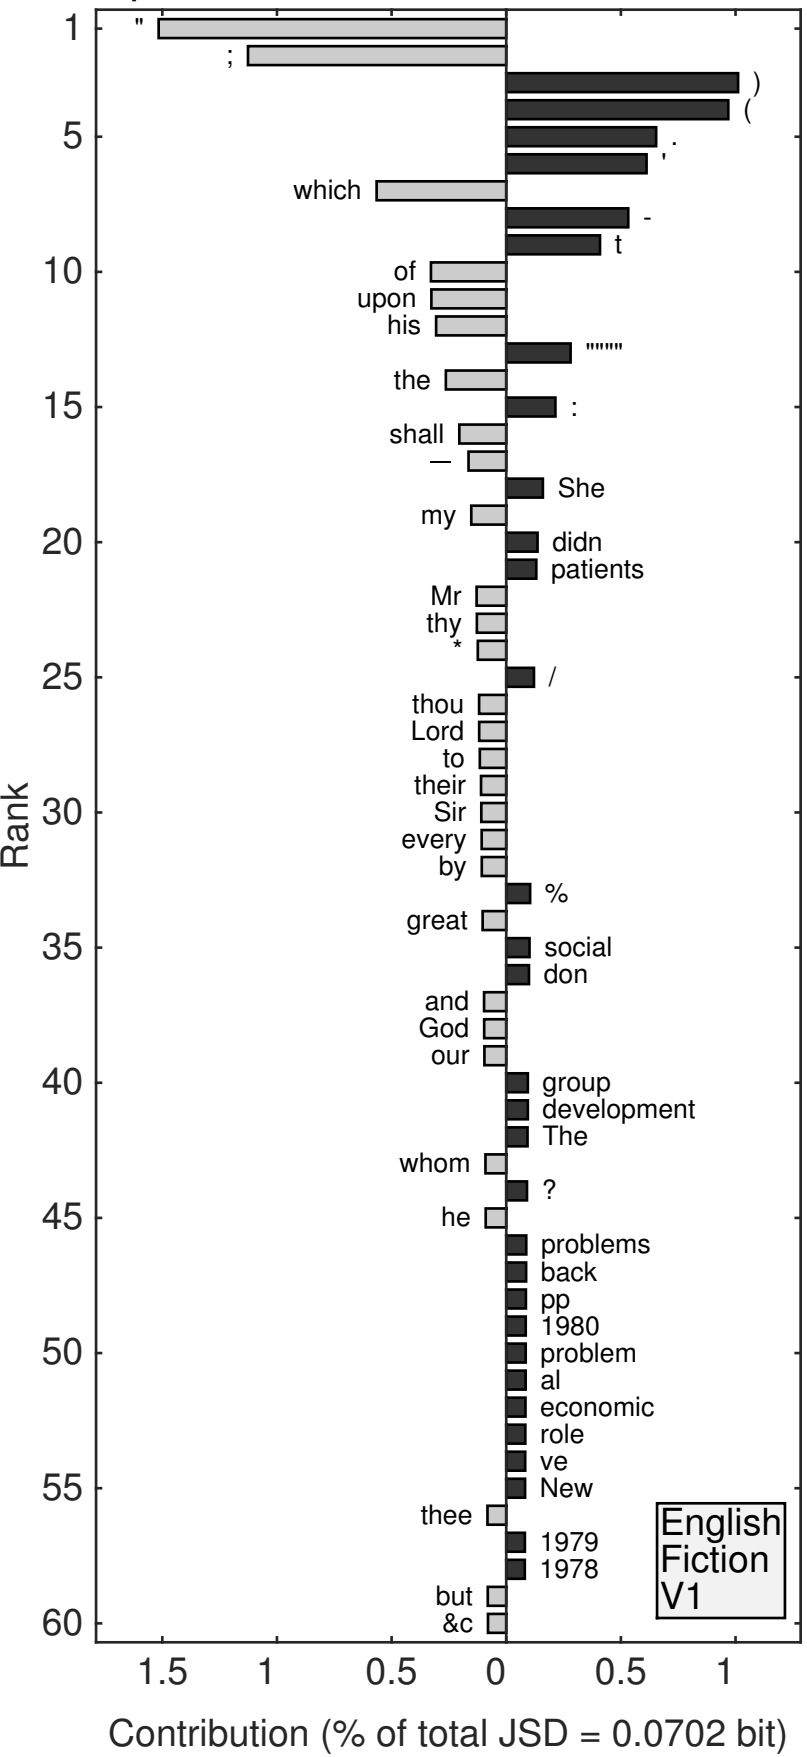

# Top JSD contributions: 1830s to 1990s

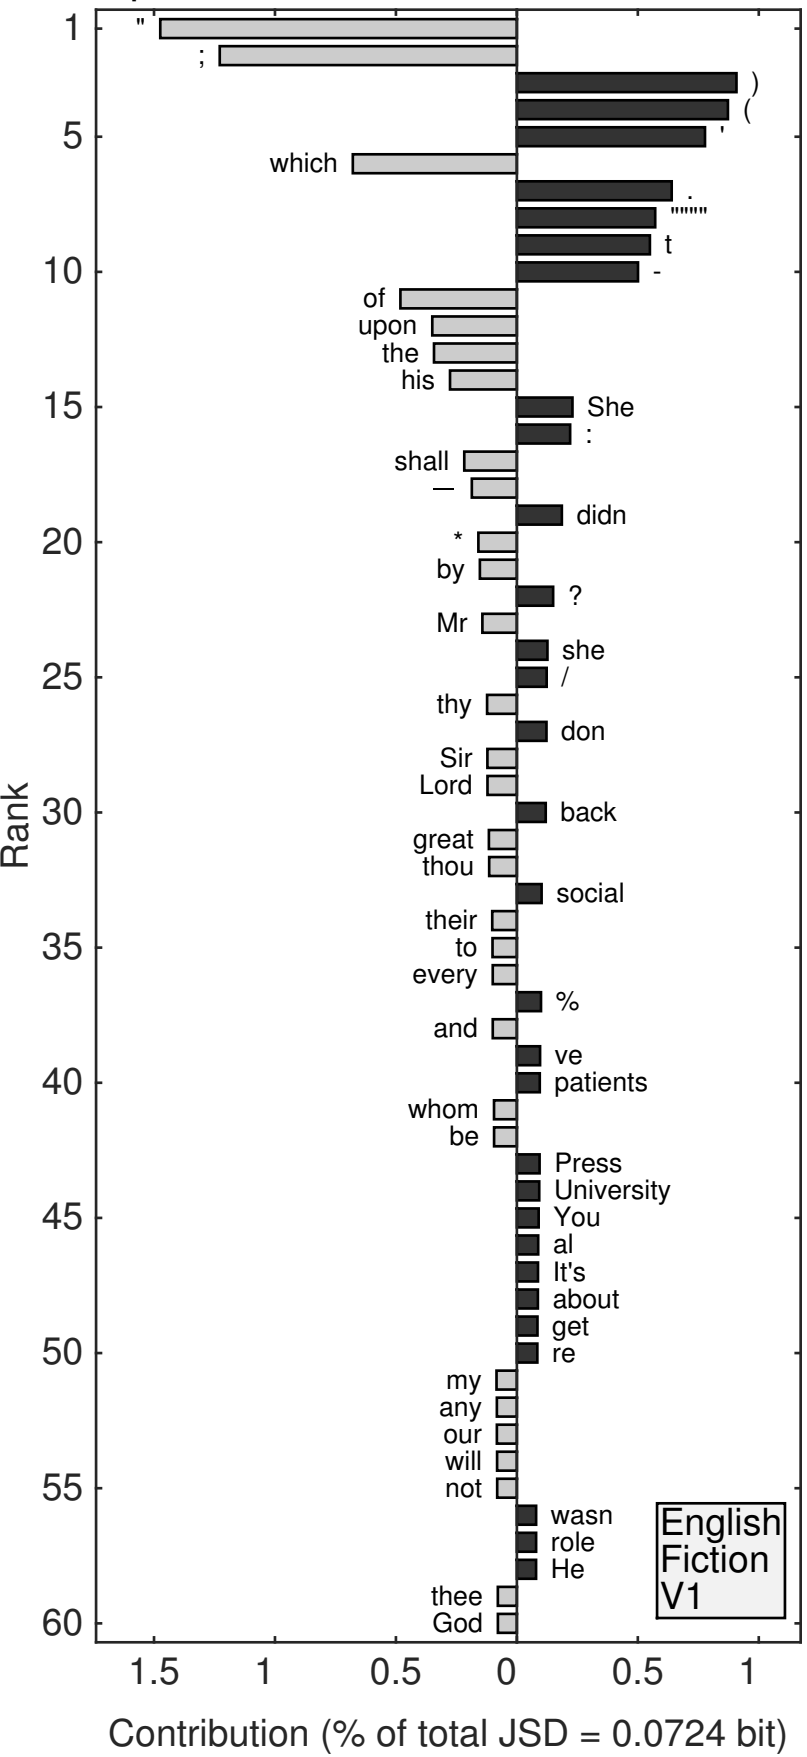

# Top JSD contributions: 1840s to 1850s

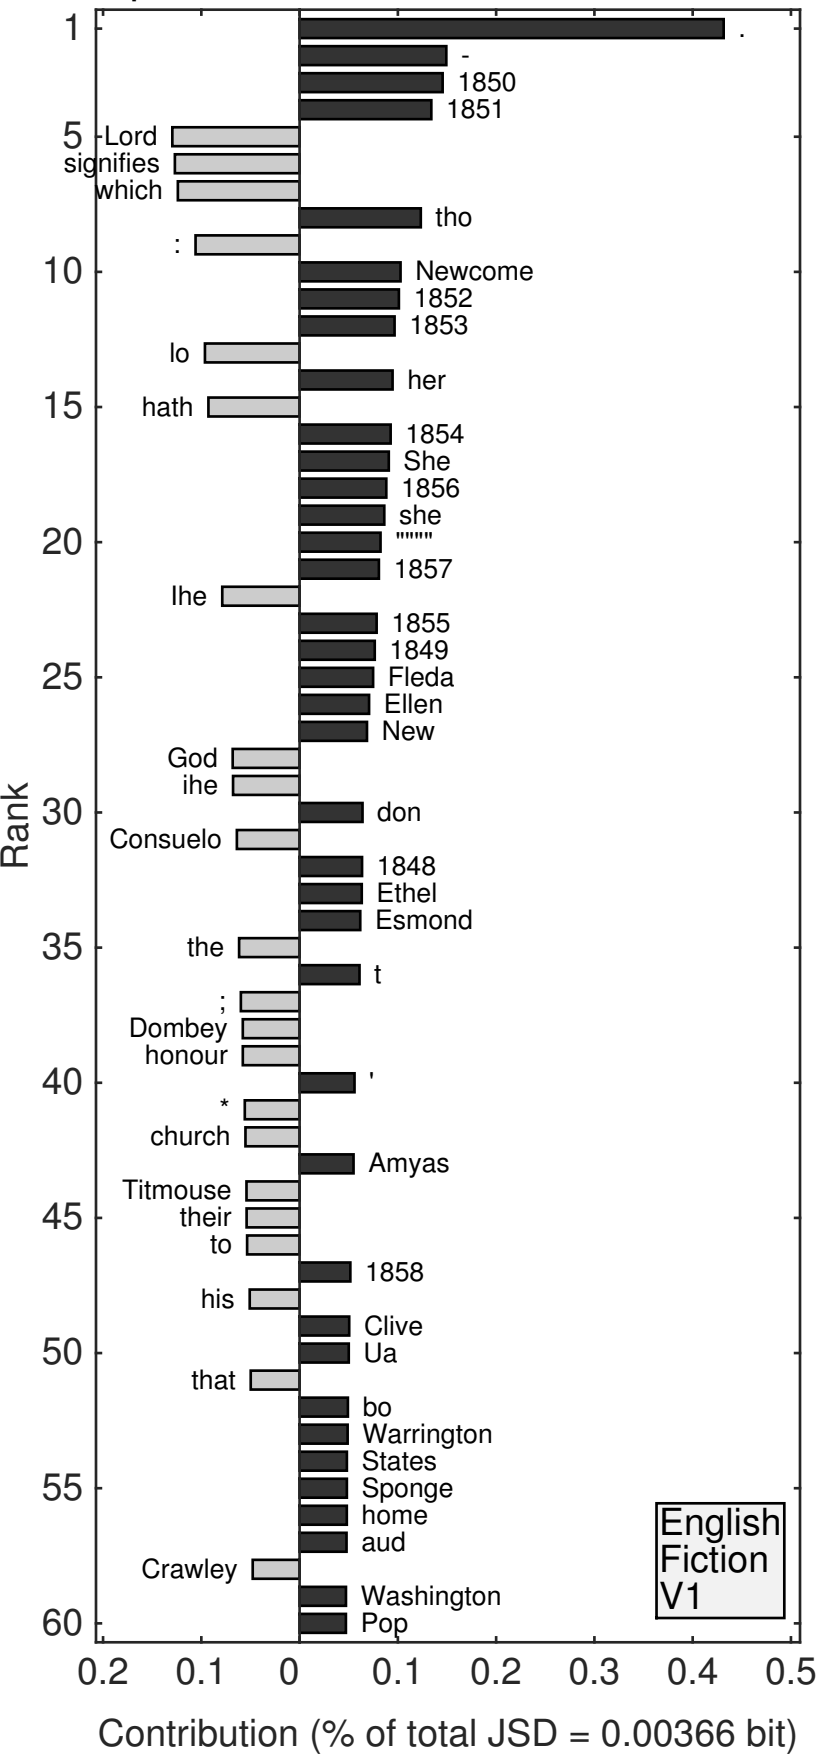

English Fiction V1

Contribution (% of total JSD = 0.00366 bit)

# Top JSD contributions: 1840s to 1860s

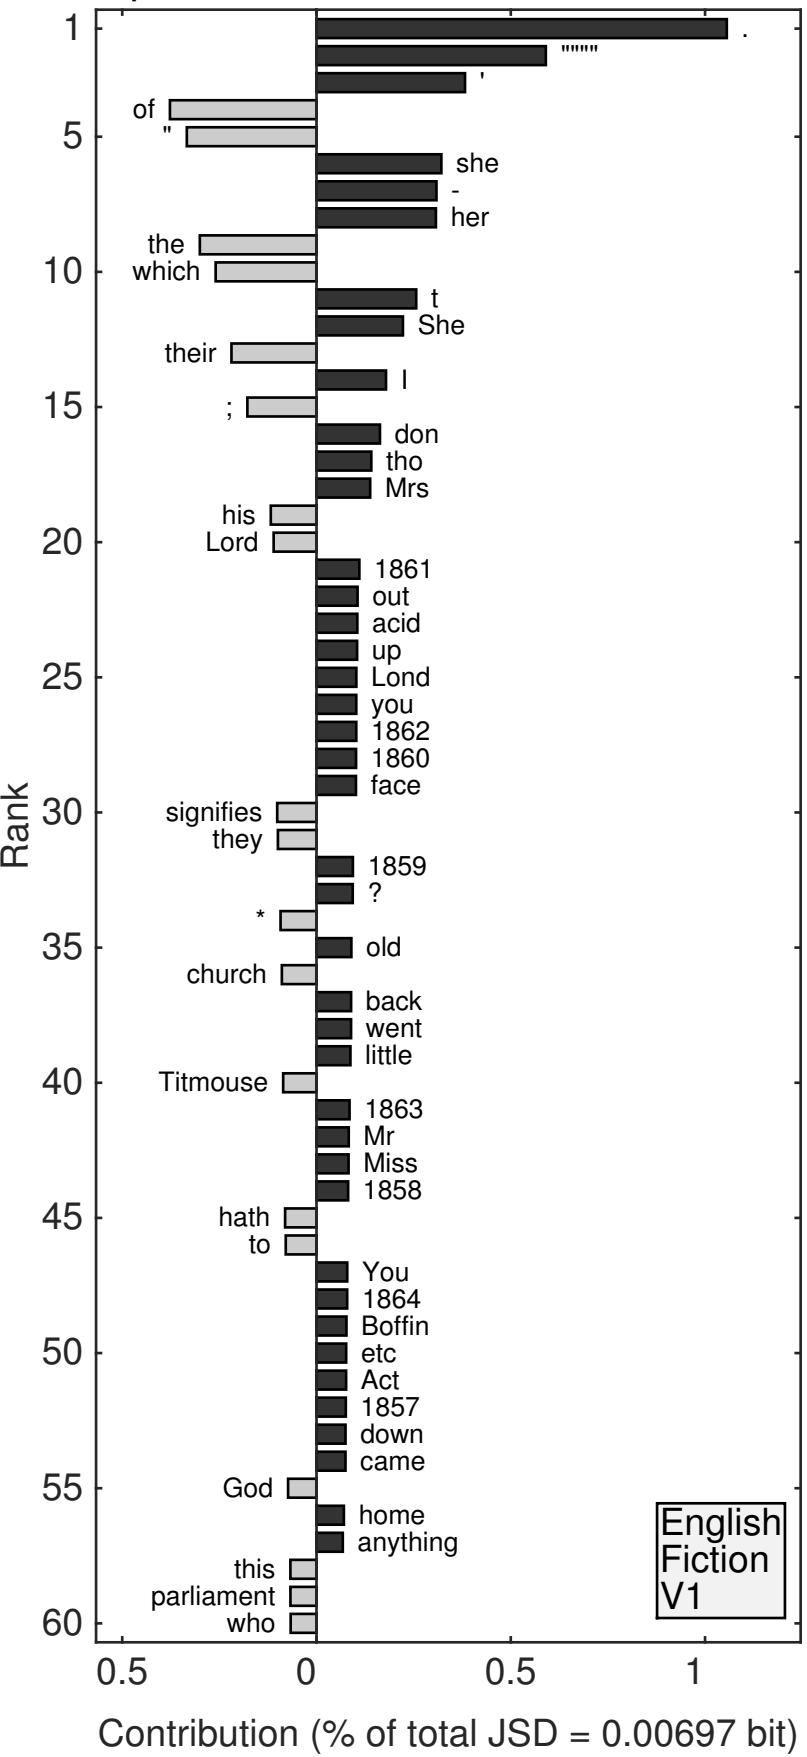



# Top JSD contributions: 1840s to 1870s

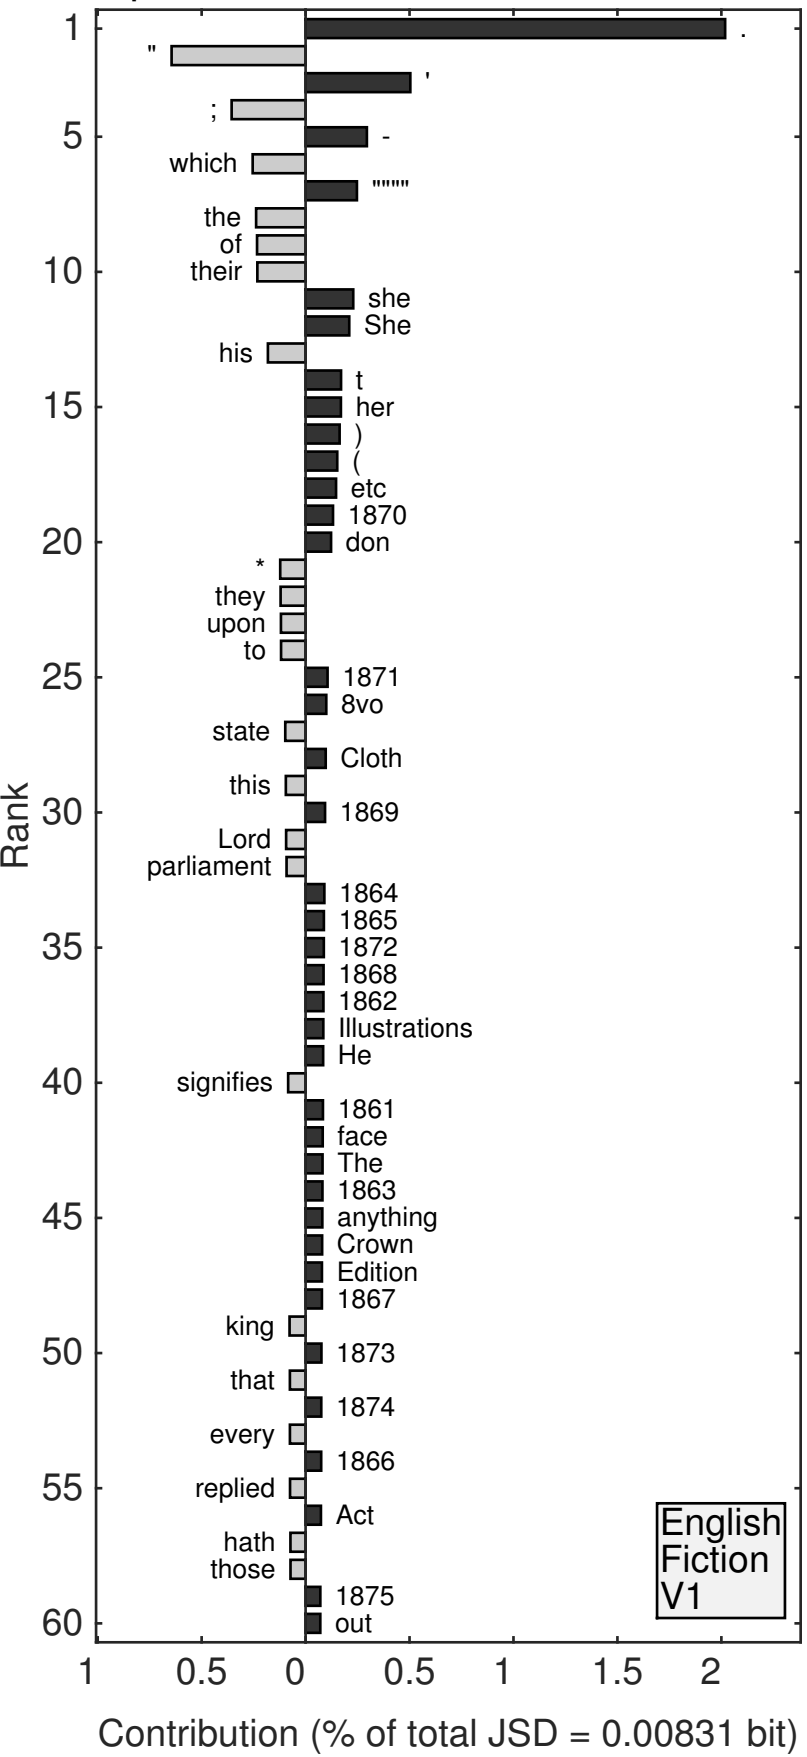

# Top JSD contributions: 1840s to 1880s

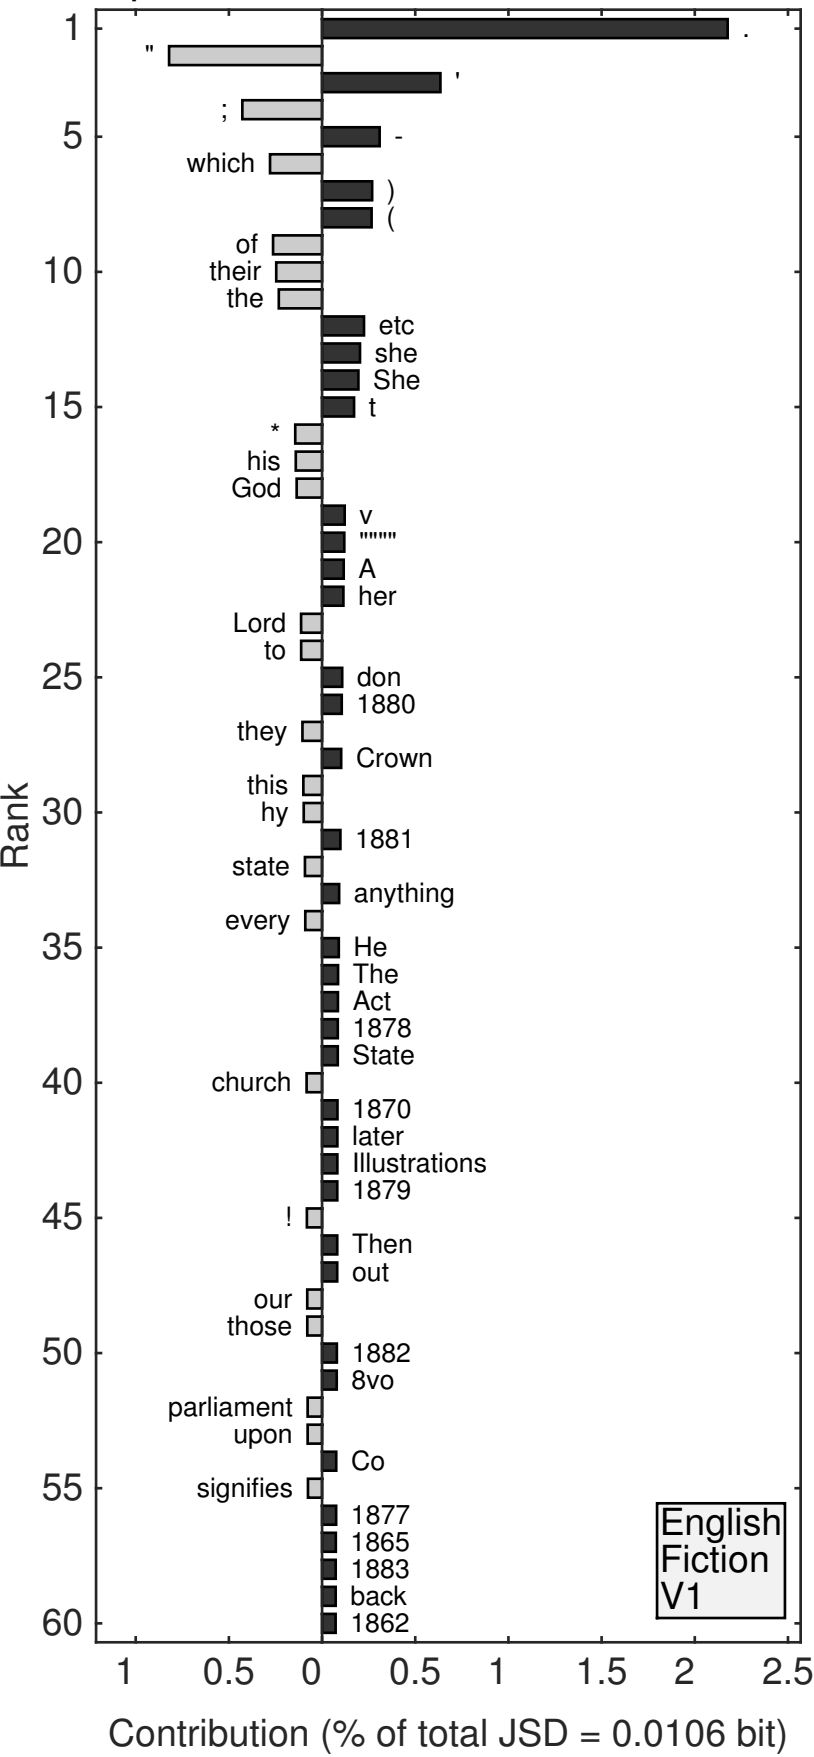

English Fiction V1

# Top JSD contributions: 1840s to 1890s

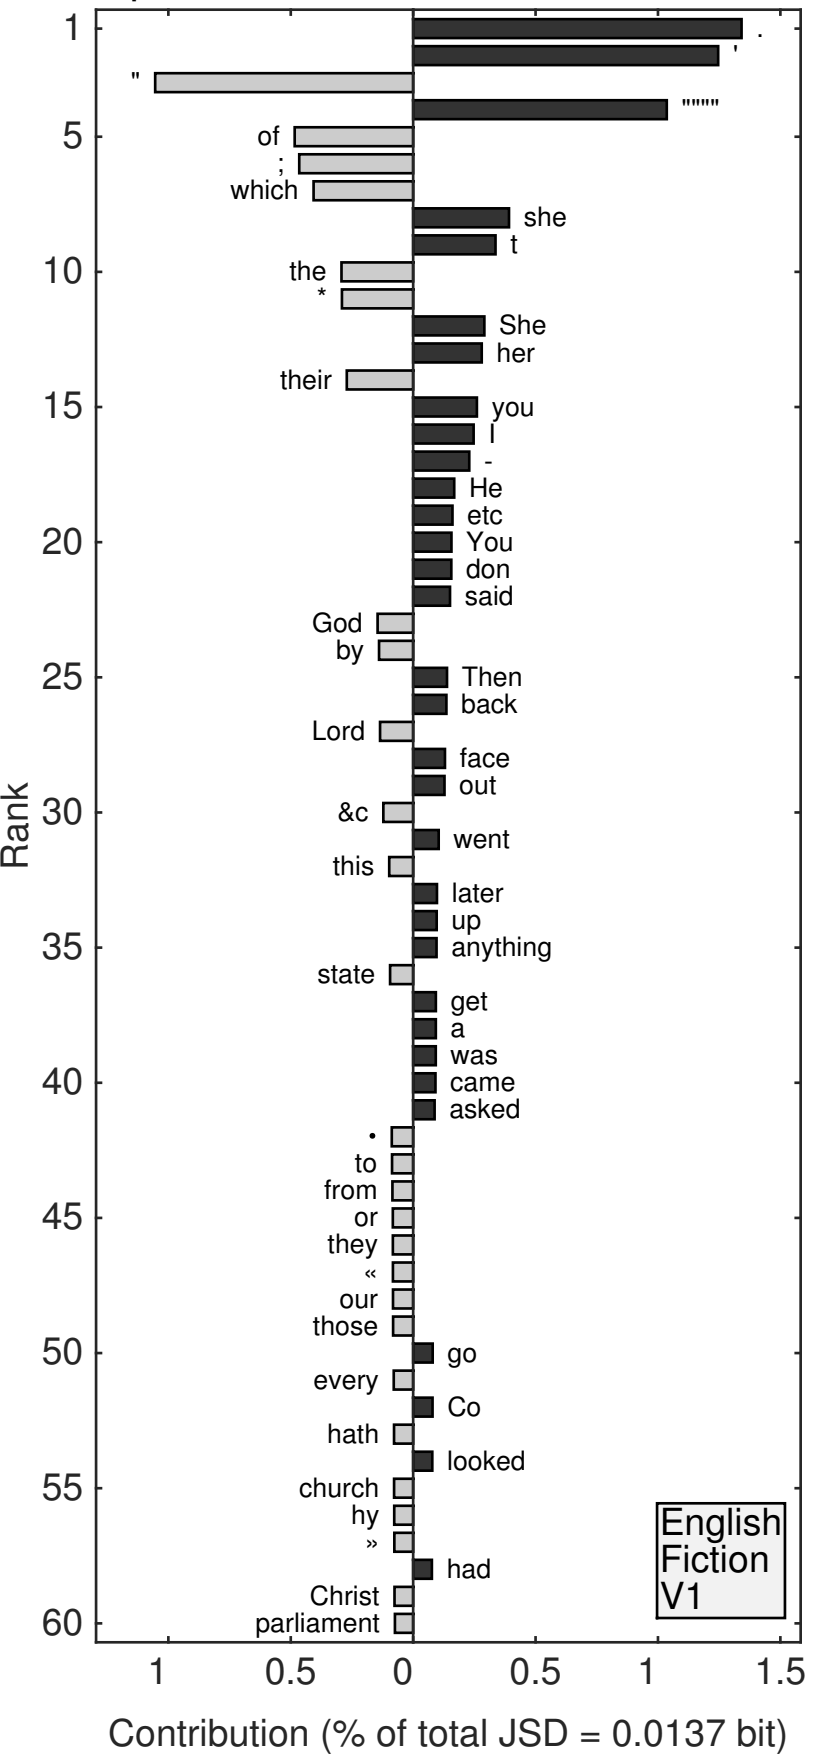

# Top JSD contributions: 1840s to 1900s

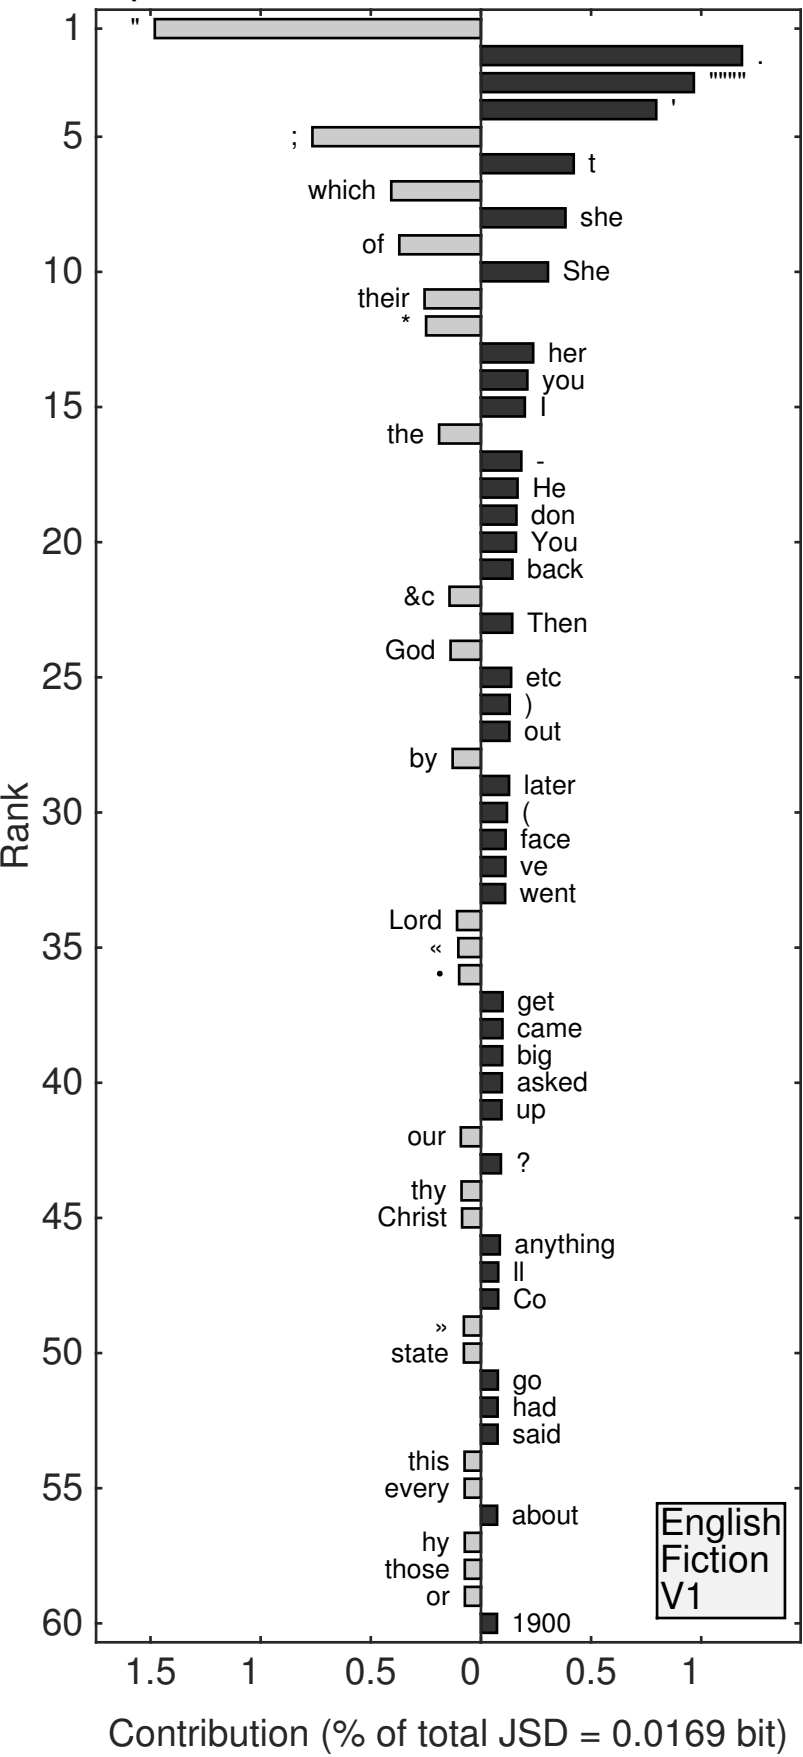

English Fiction V1

# Top JSD contributions: 1840s to 1910s

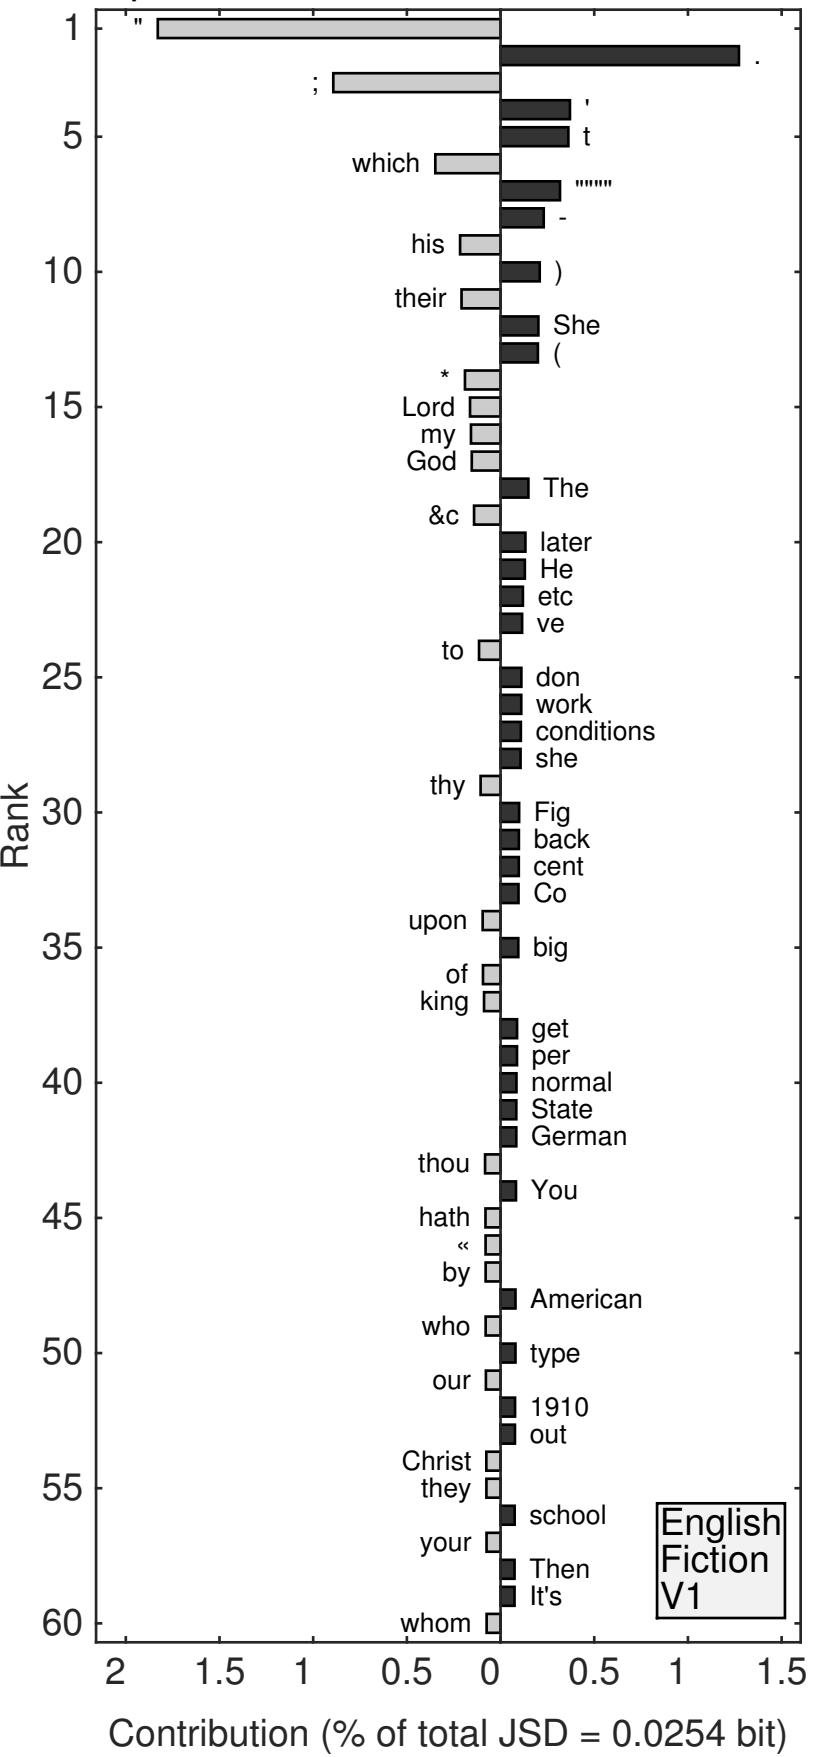

# Top JSD contributions: 1840s to 1920s

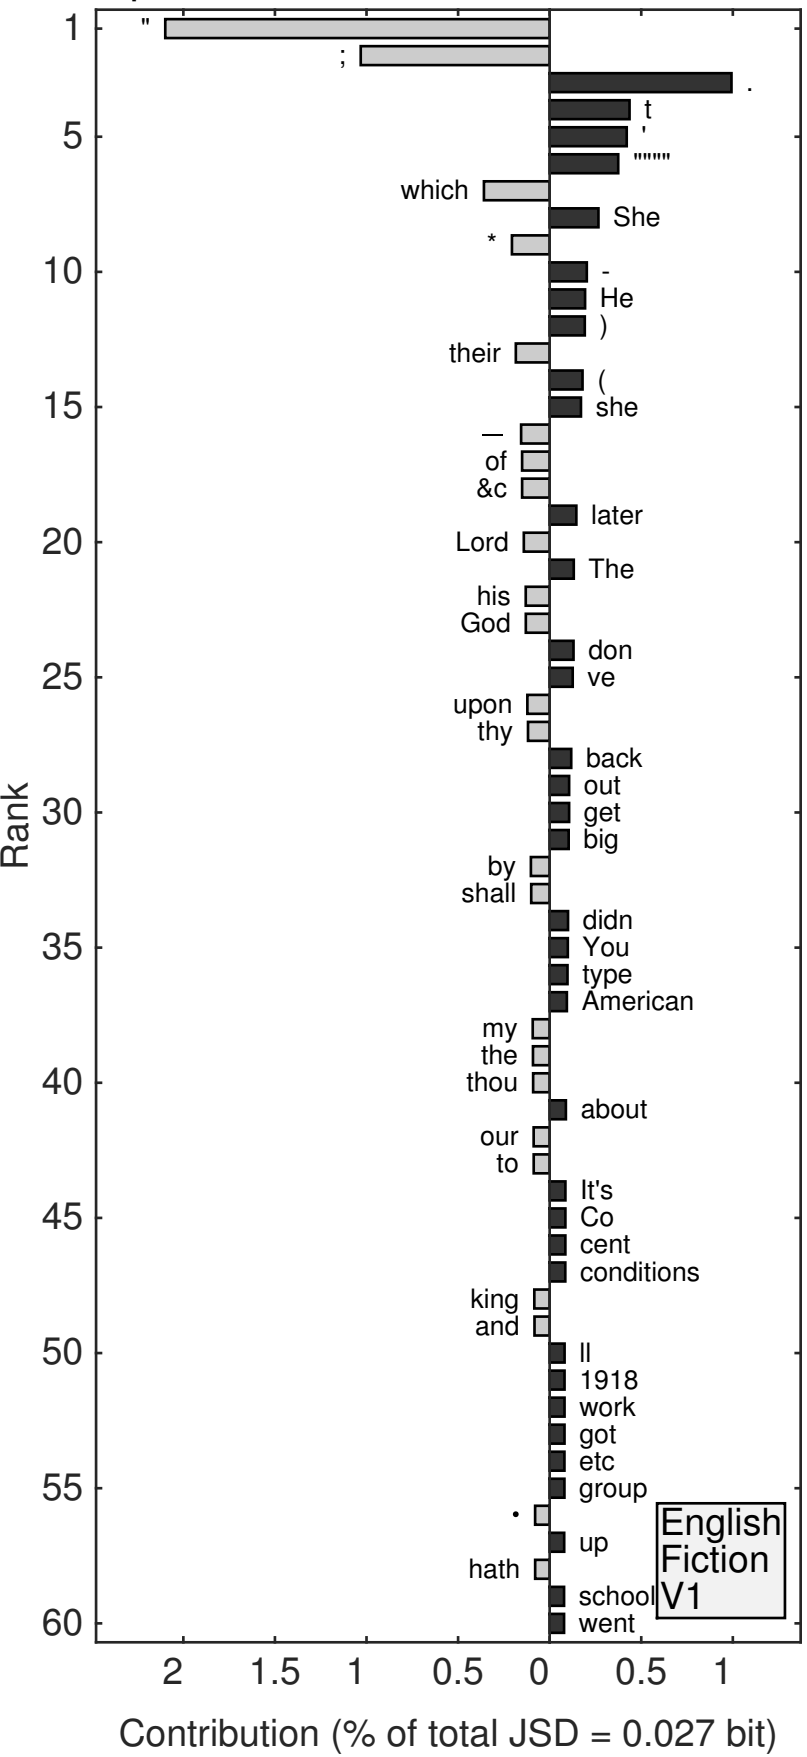

# Top JSD contributions: 1840s to 1930s

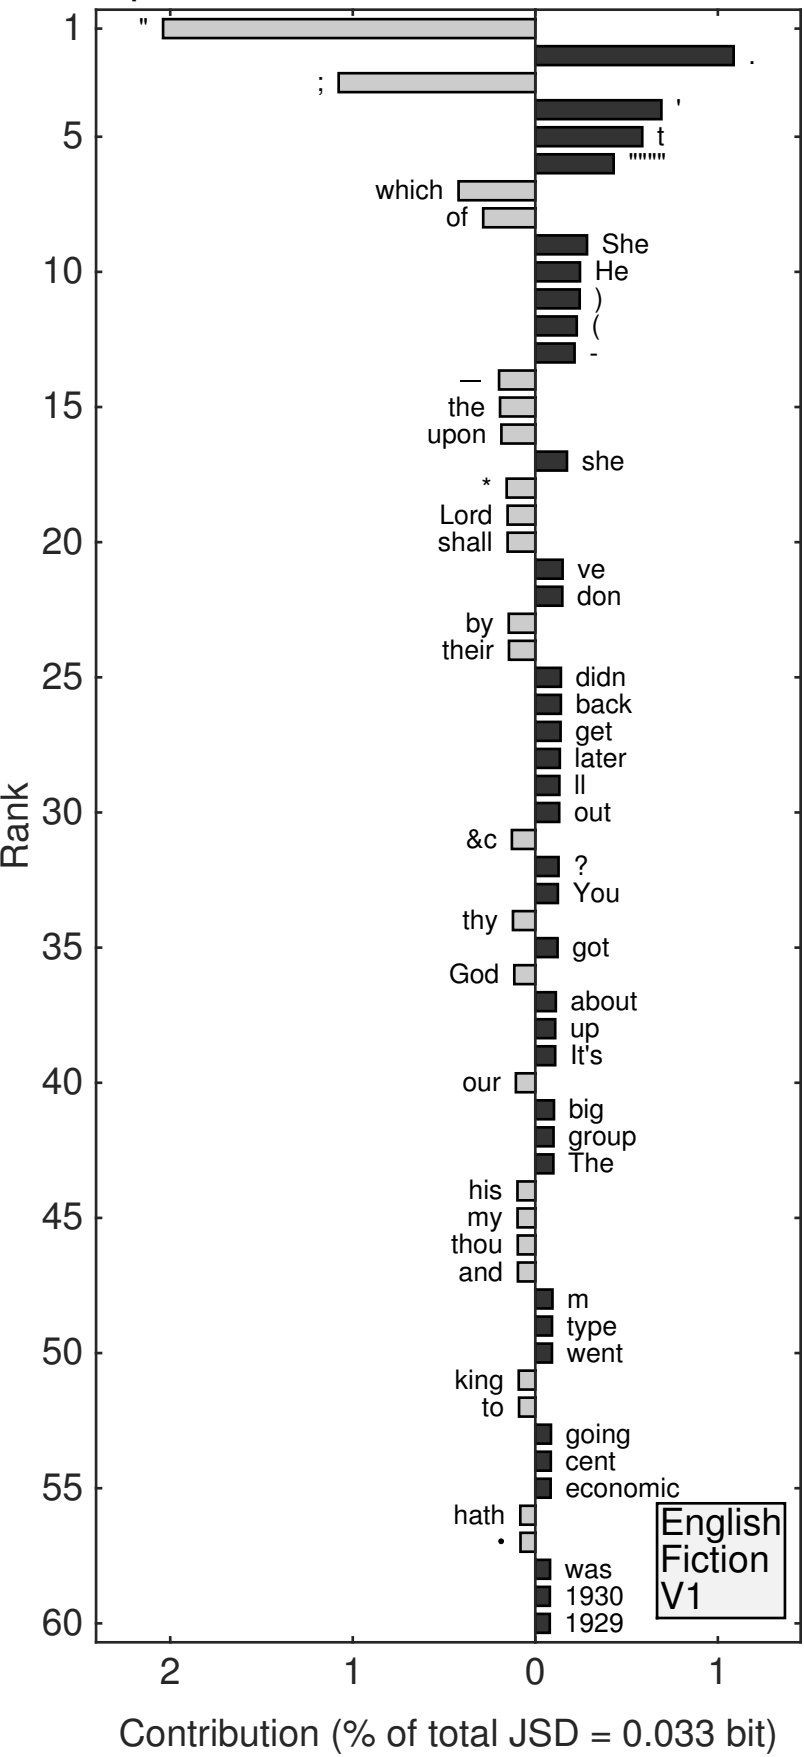

# Top JSD contributions: 1840s to 1940s

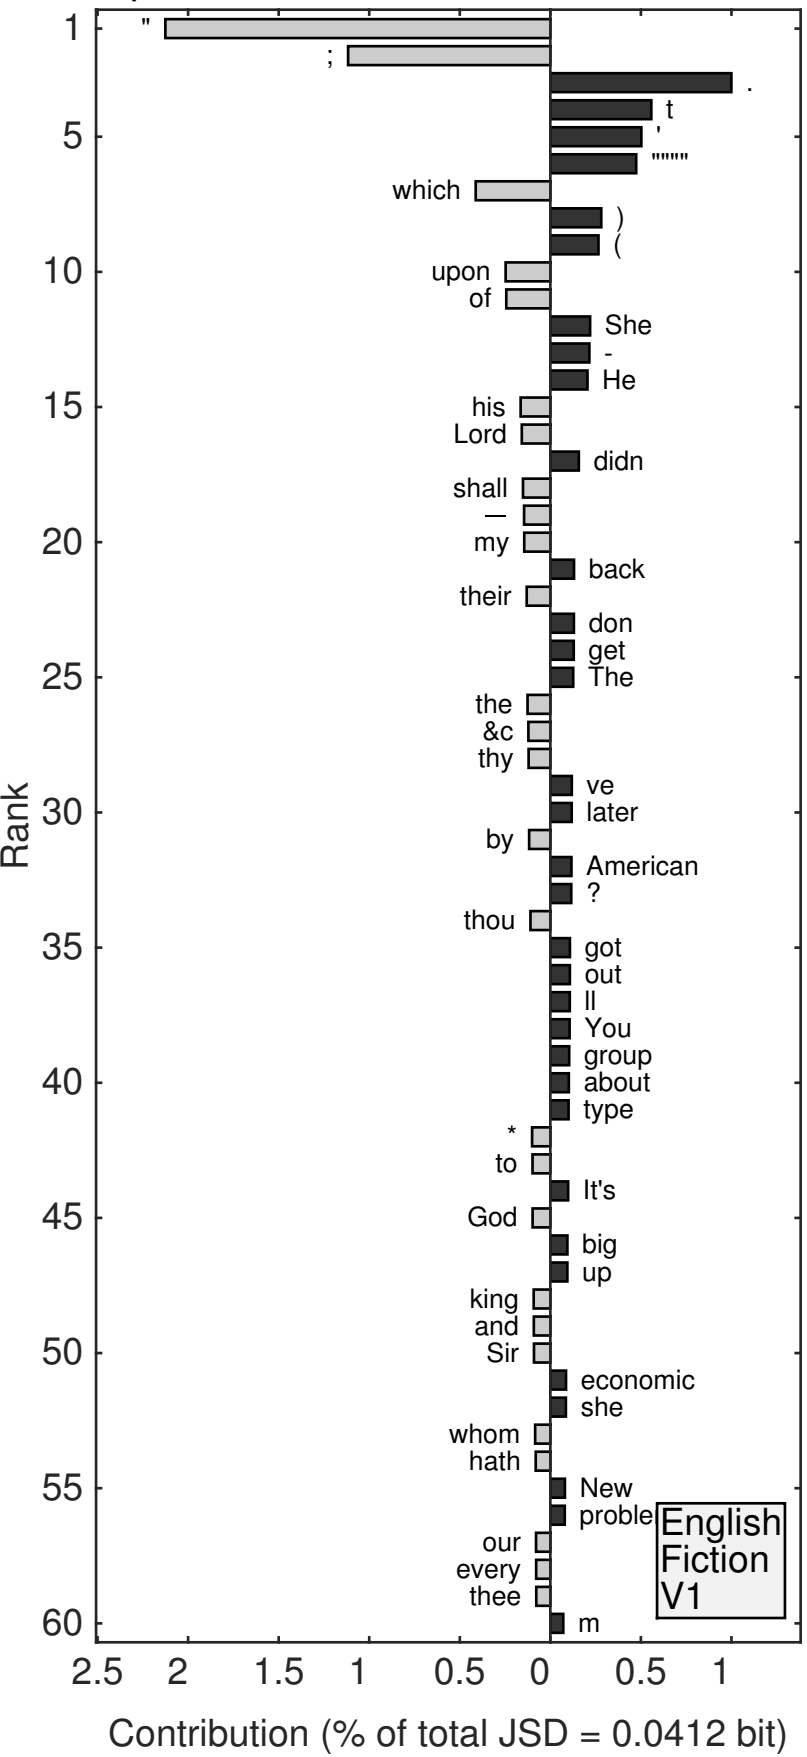



# Top JSD contributions: 1840s to 1950s

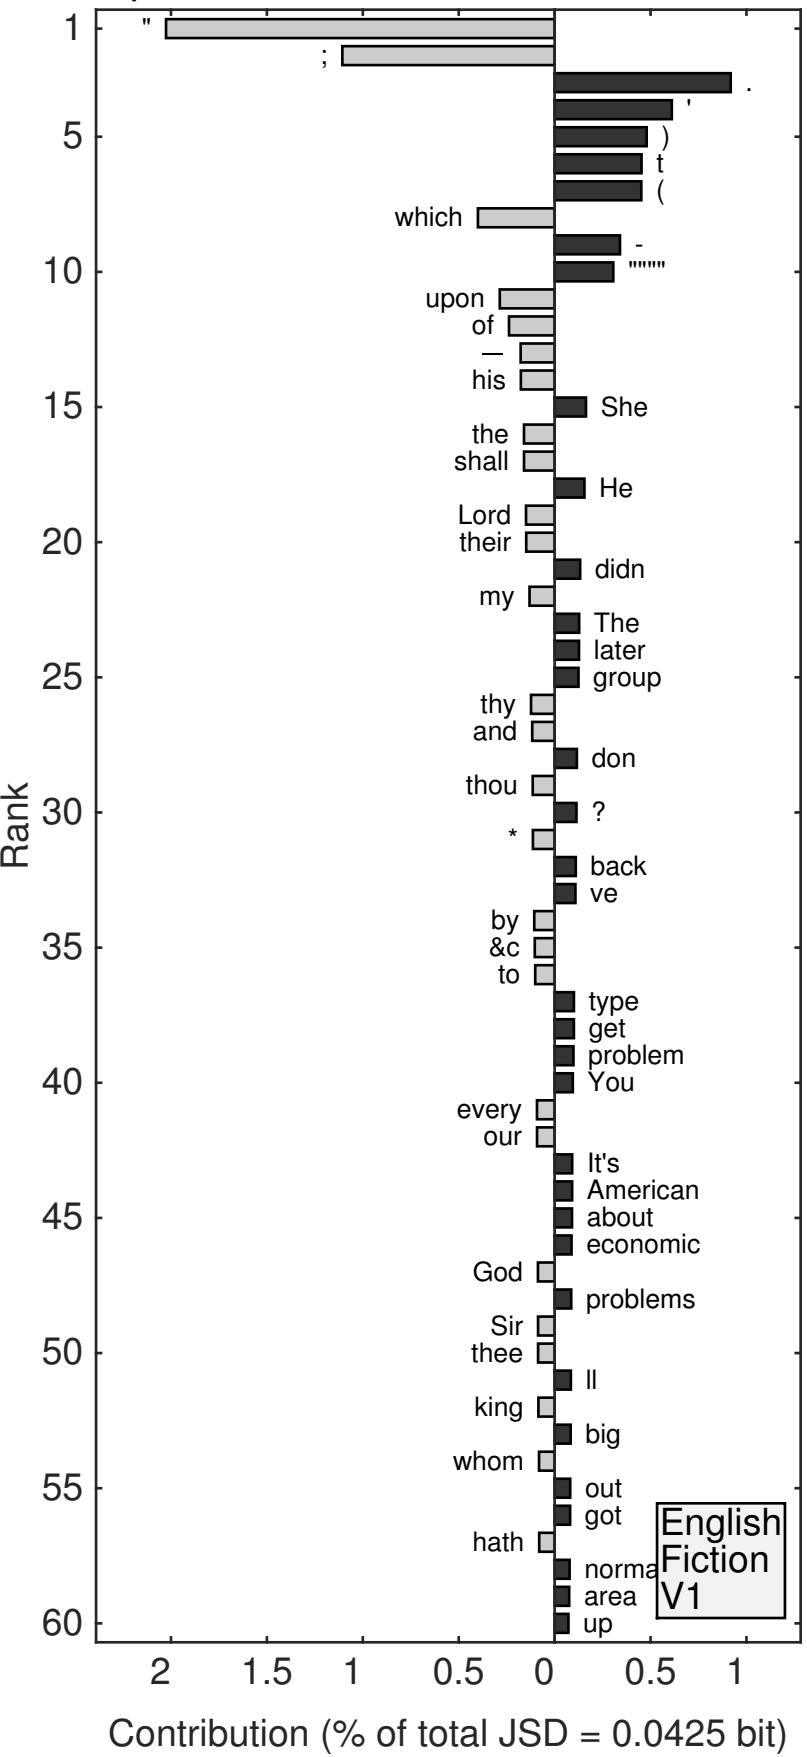

# Top JSD contributions: 1840s to 1960s

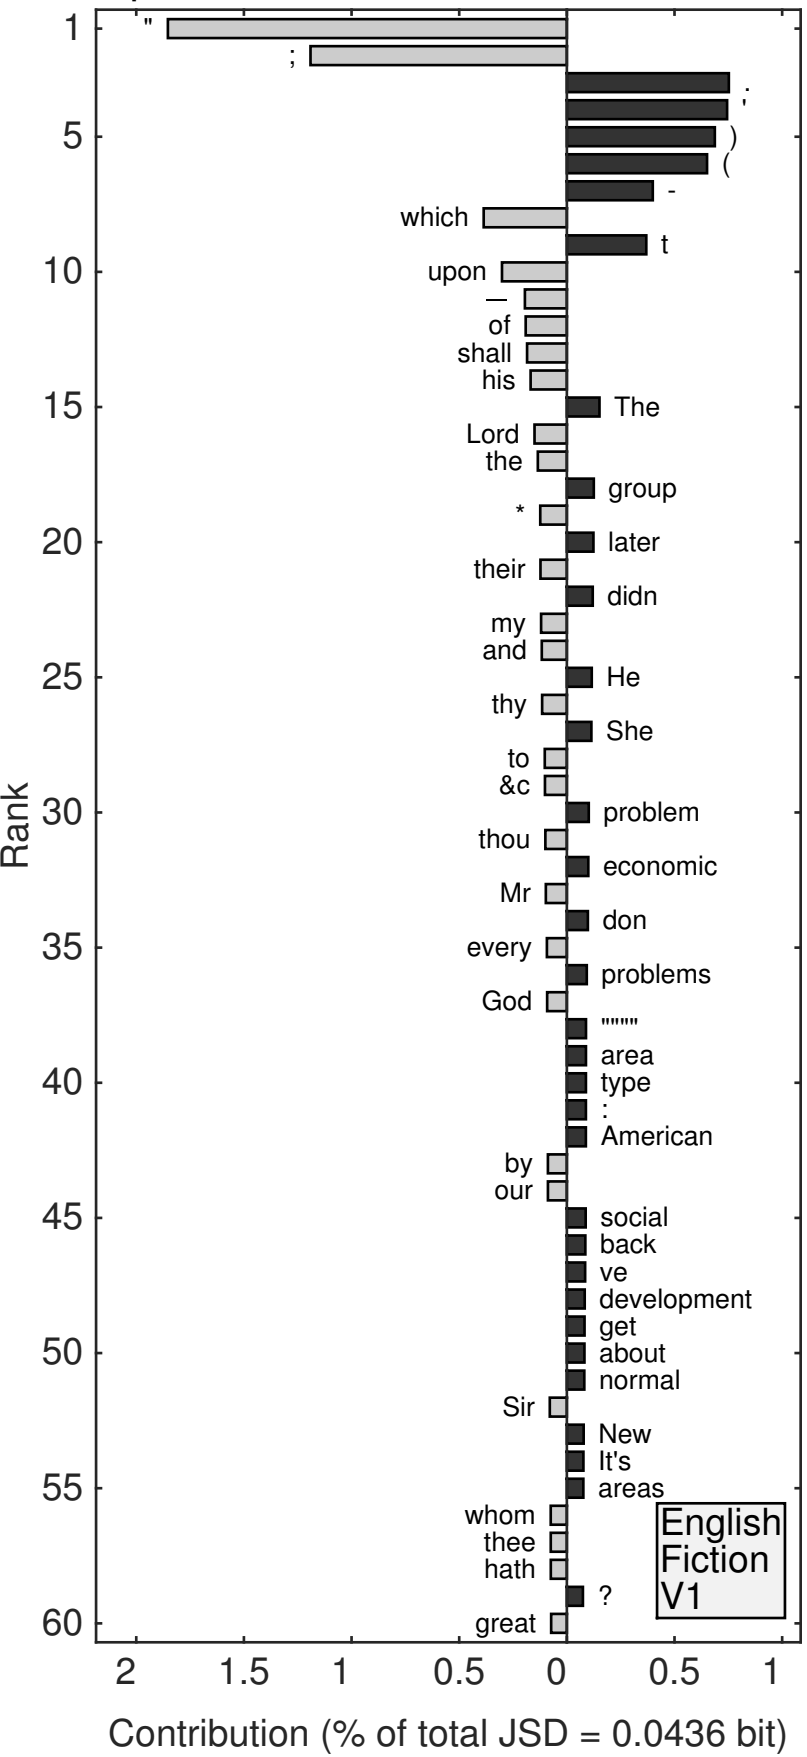

# Top JSD contributions: 1840s to 1970s

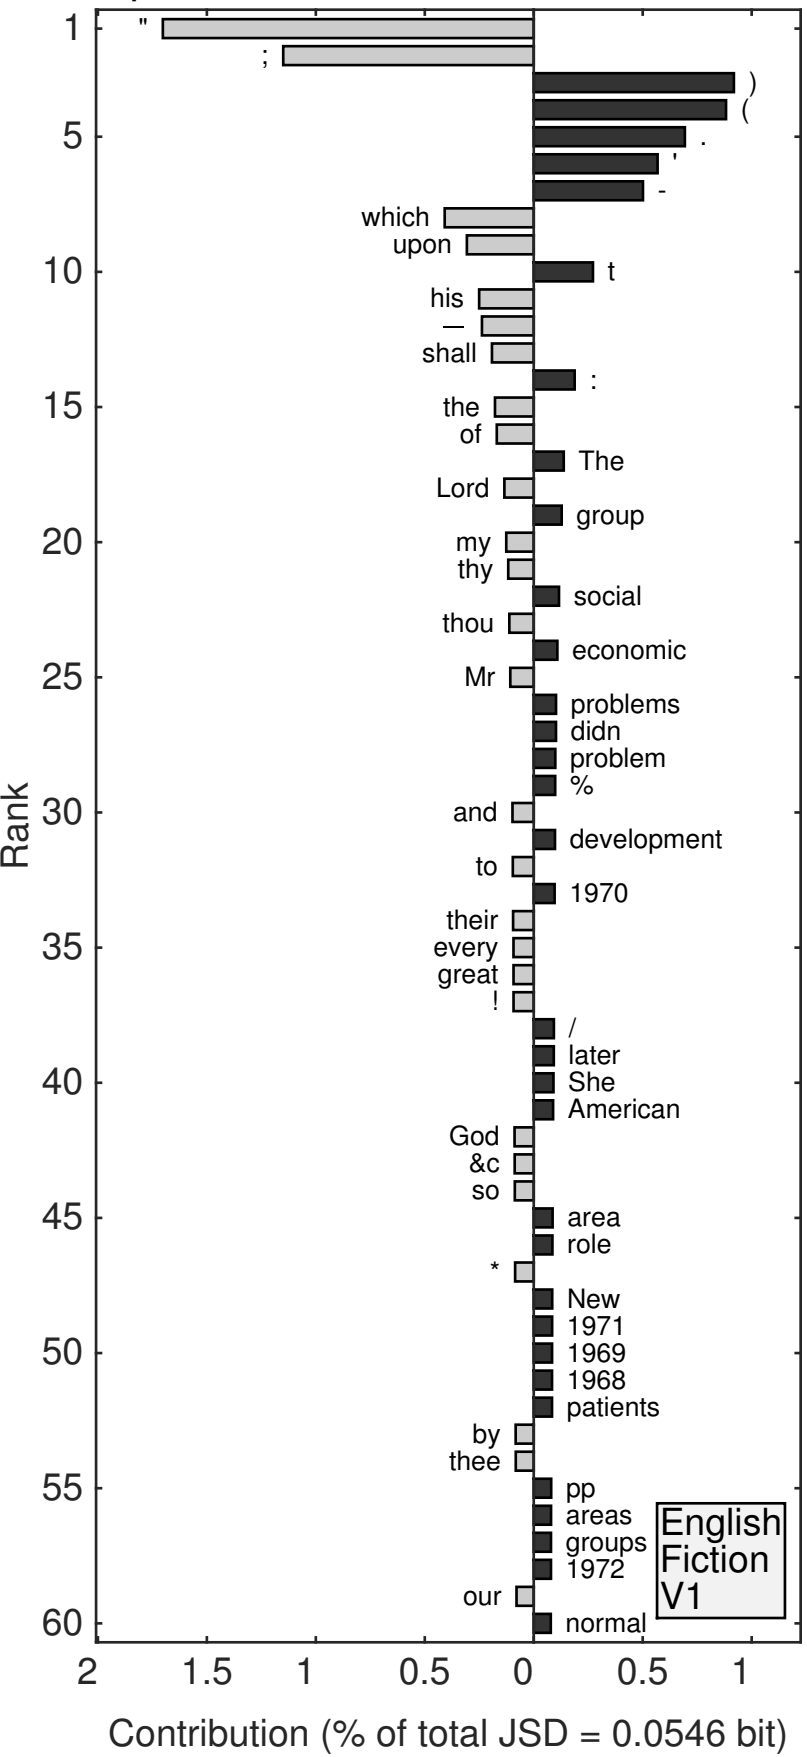

English Fiction V1

Contribution (% of total JSD = 0.0546 bit)

# Top JSD contributions: 1840s to 1980s

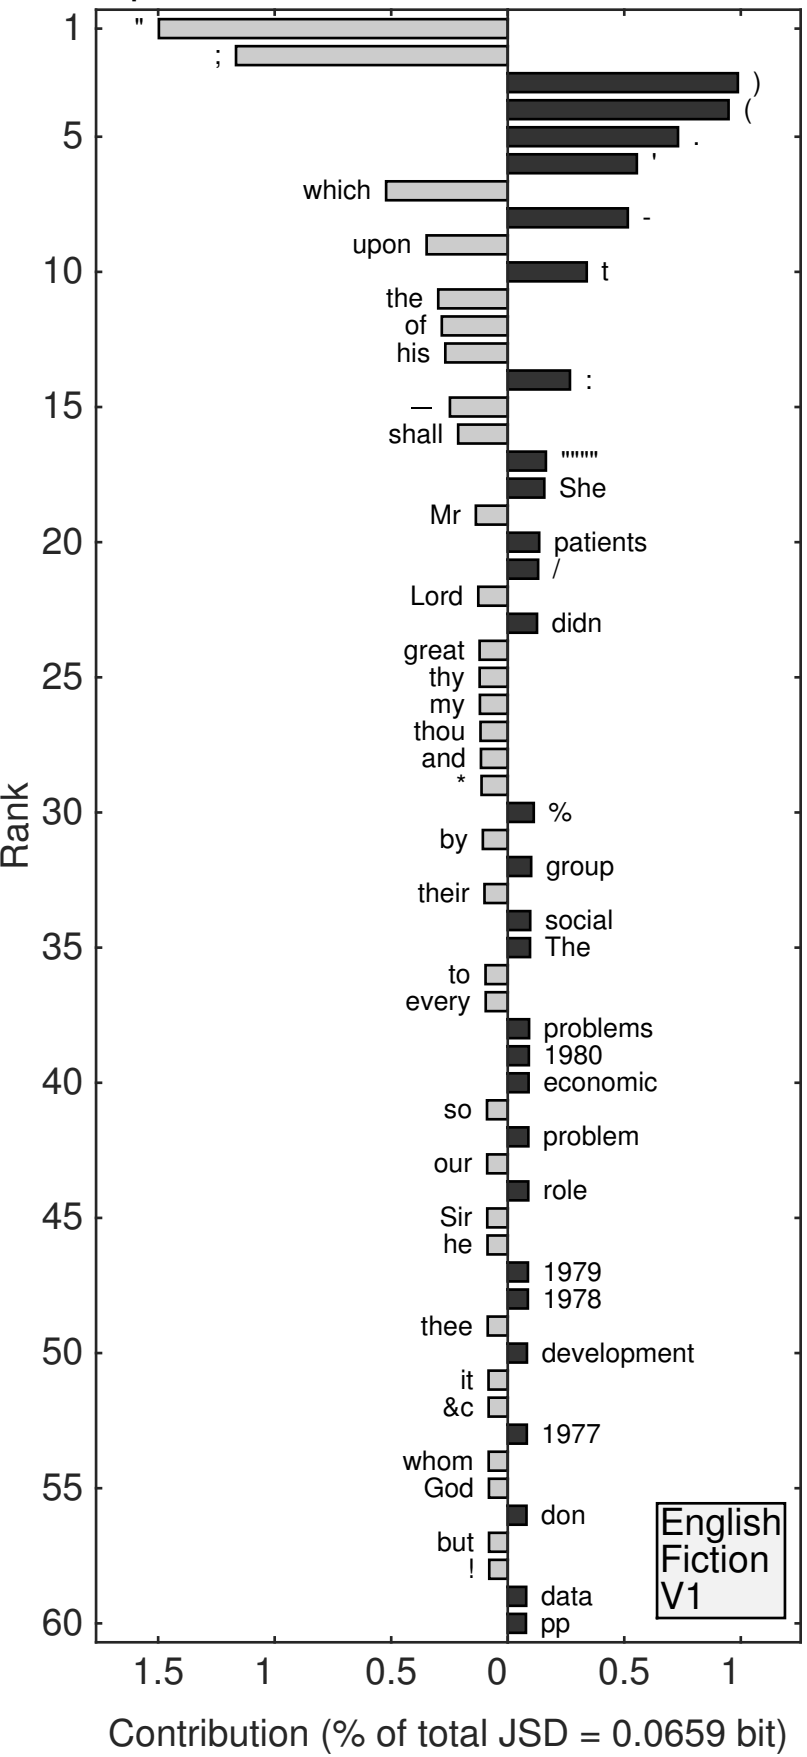

English Fiction V1

# Top JSD contributions: 1840s to 1990s

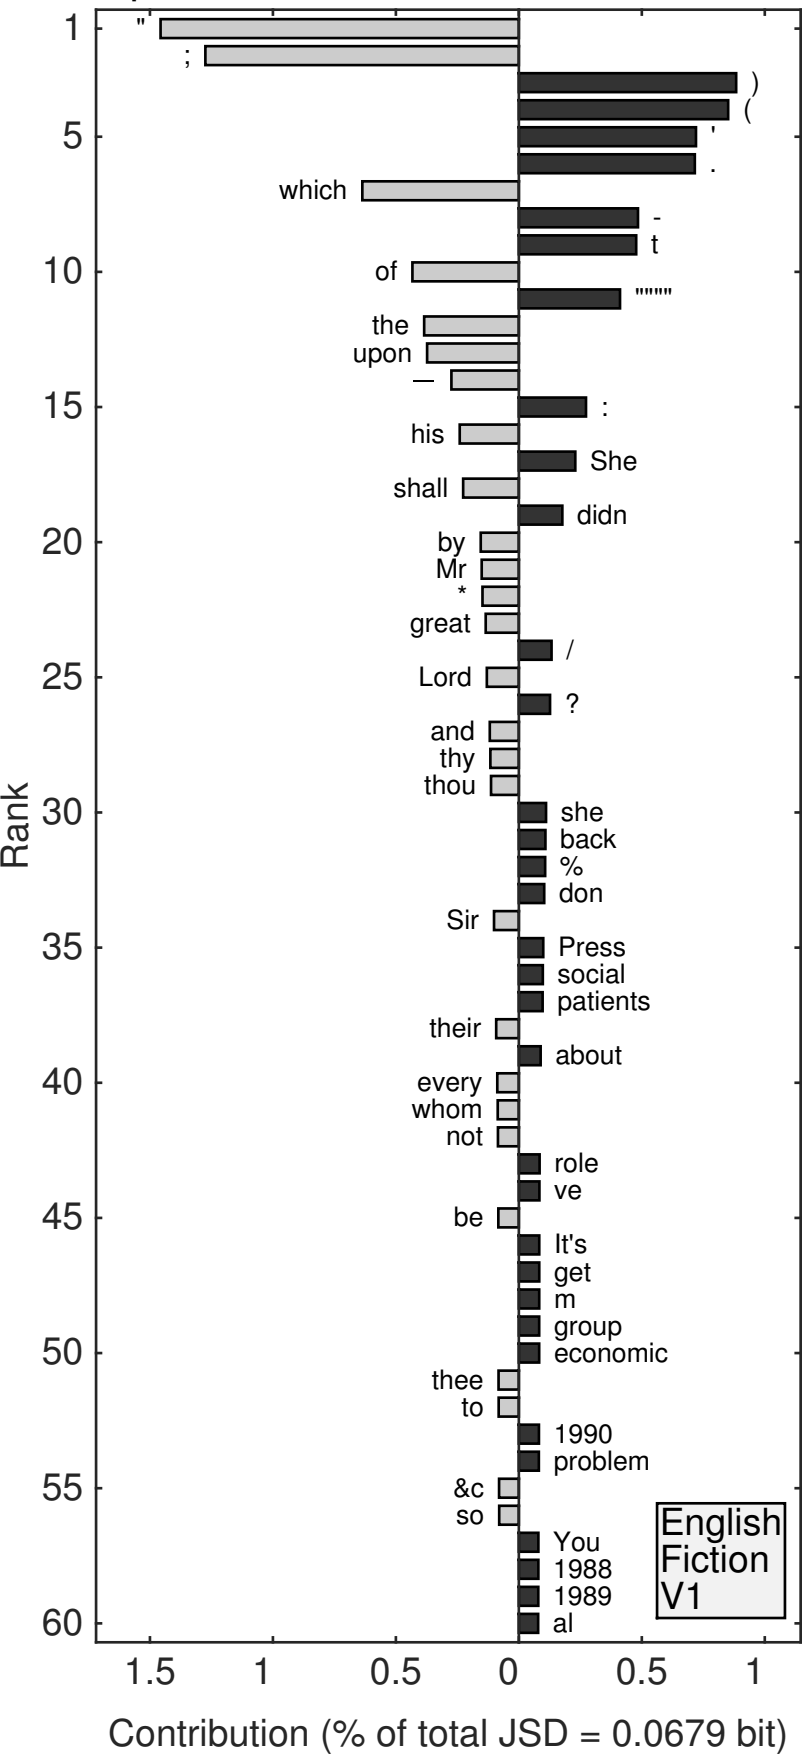

# Top JSD contributions: 1850s to 1860s

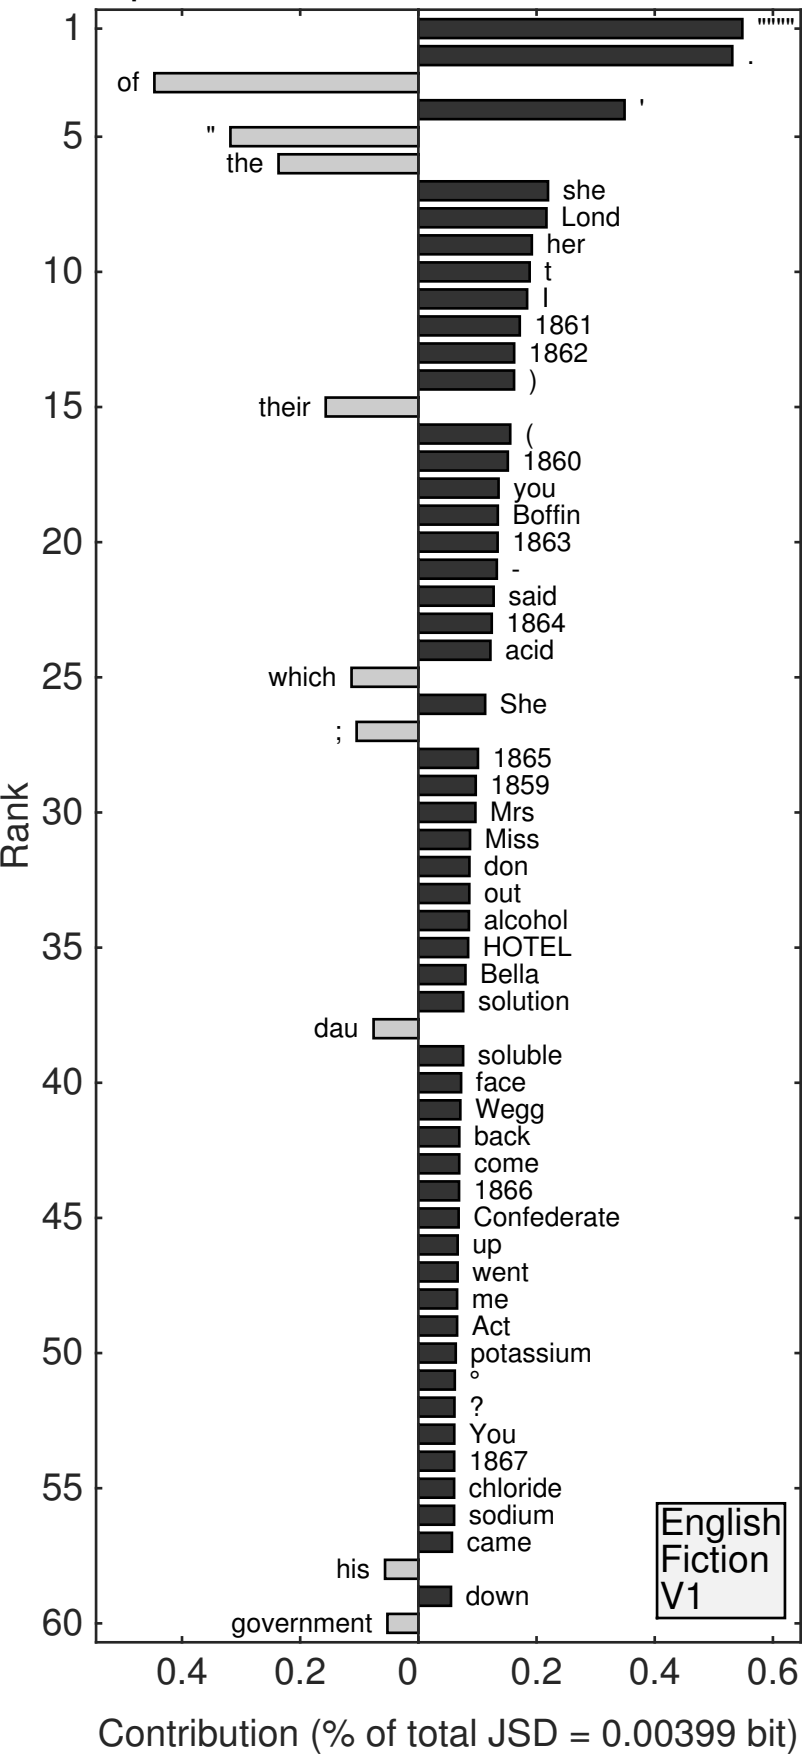

English Fiction V1

# Top JSD contributions: 1850s to 1870s

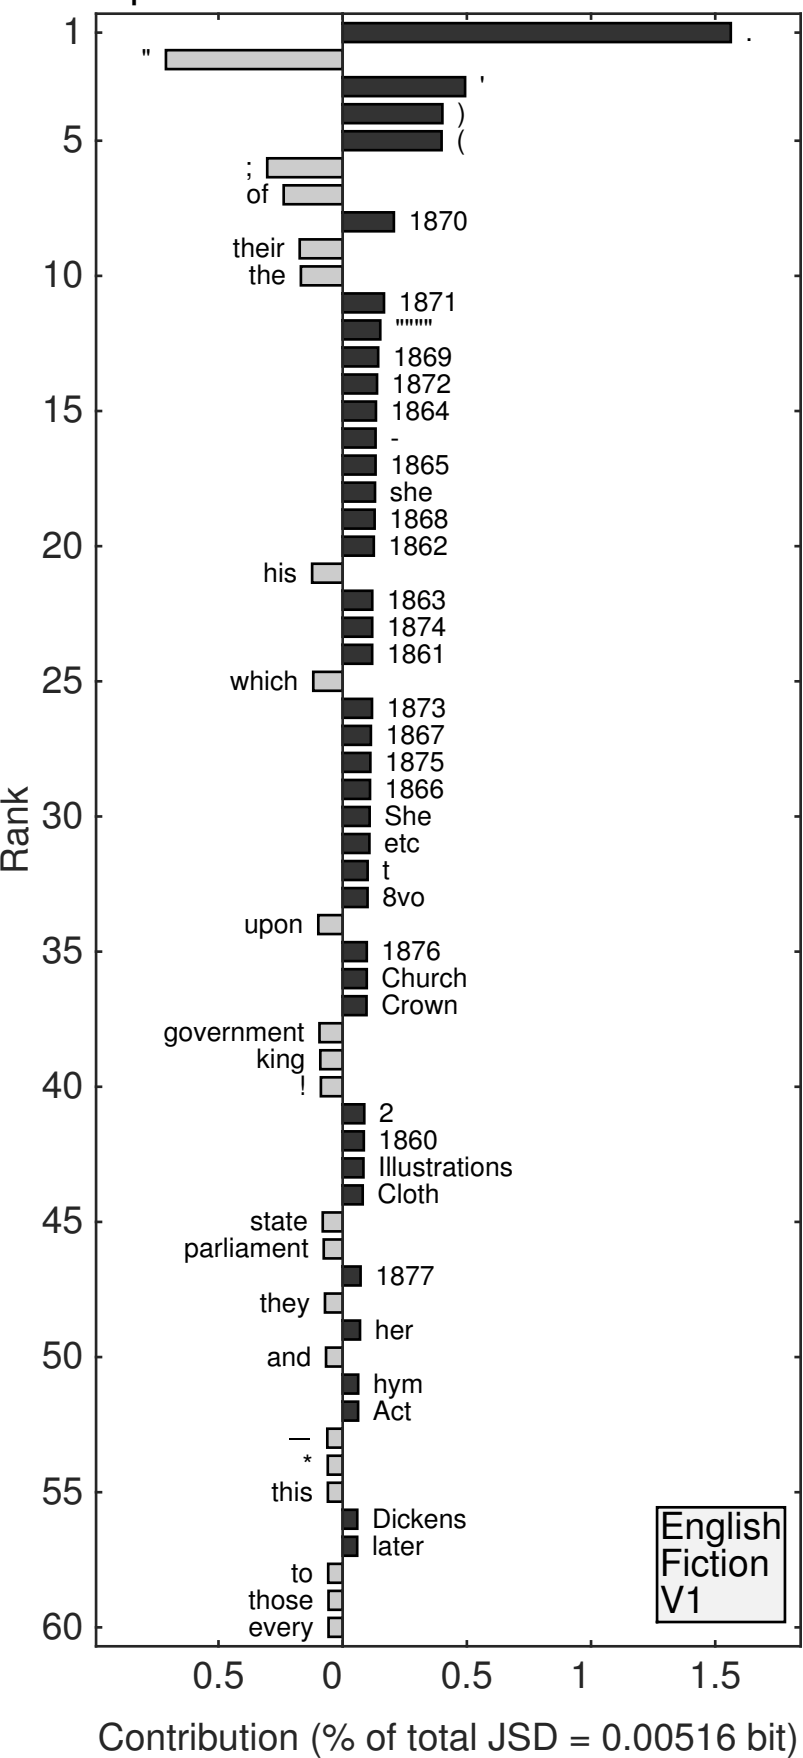

# Top JSD contributions: 1850s to 1880s

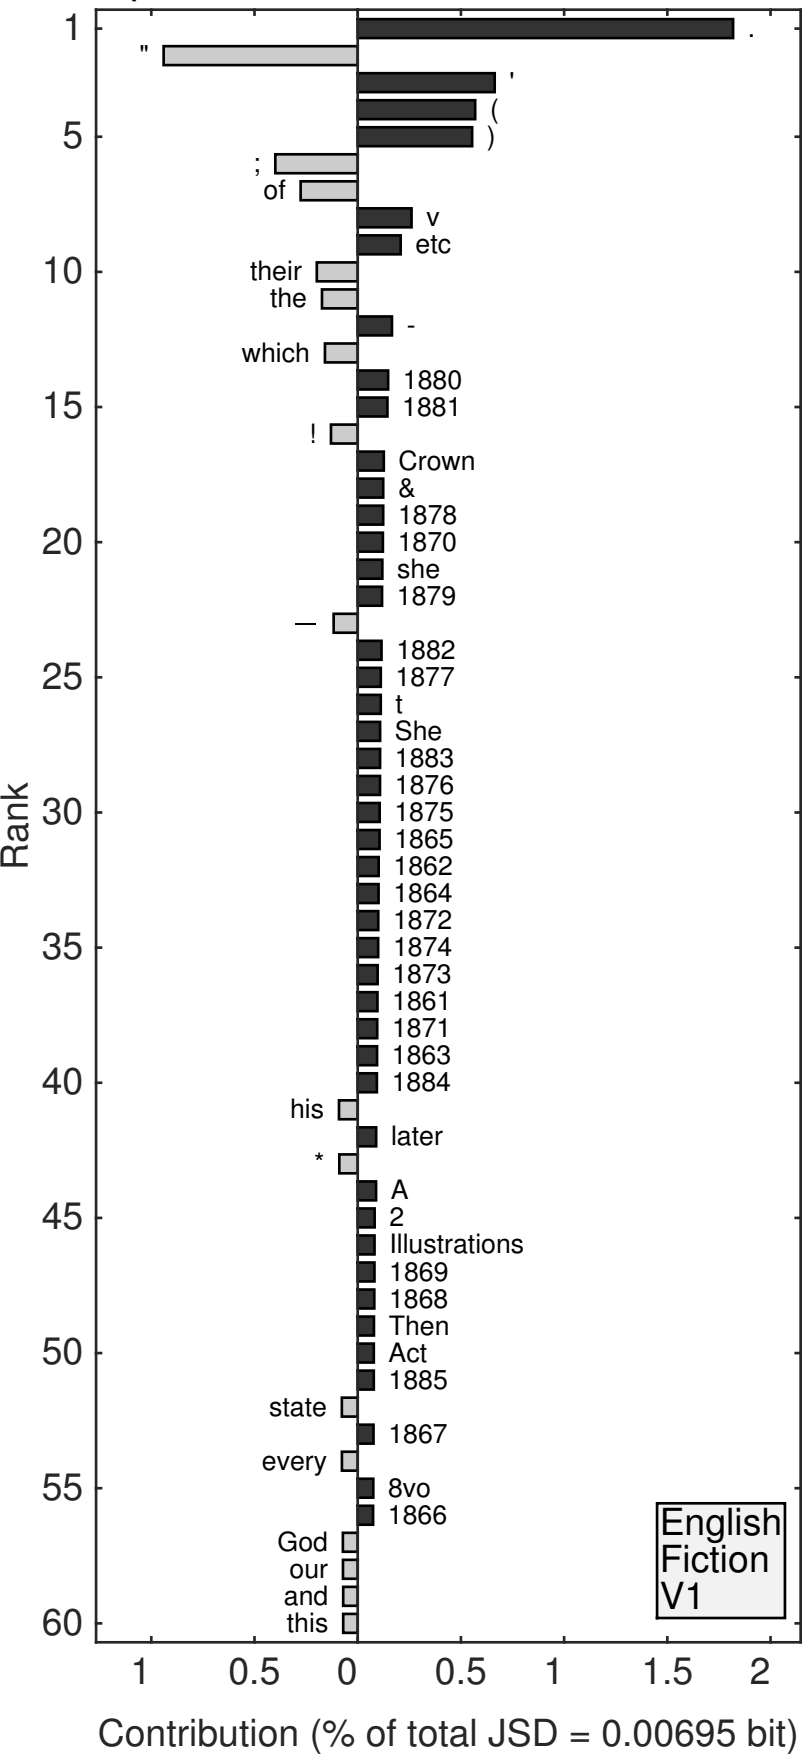



# Top JSD contributions: 1850s to 1890s

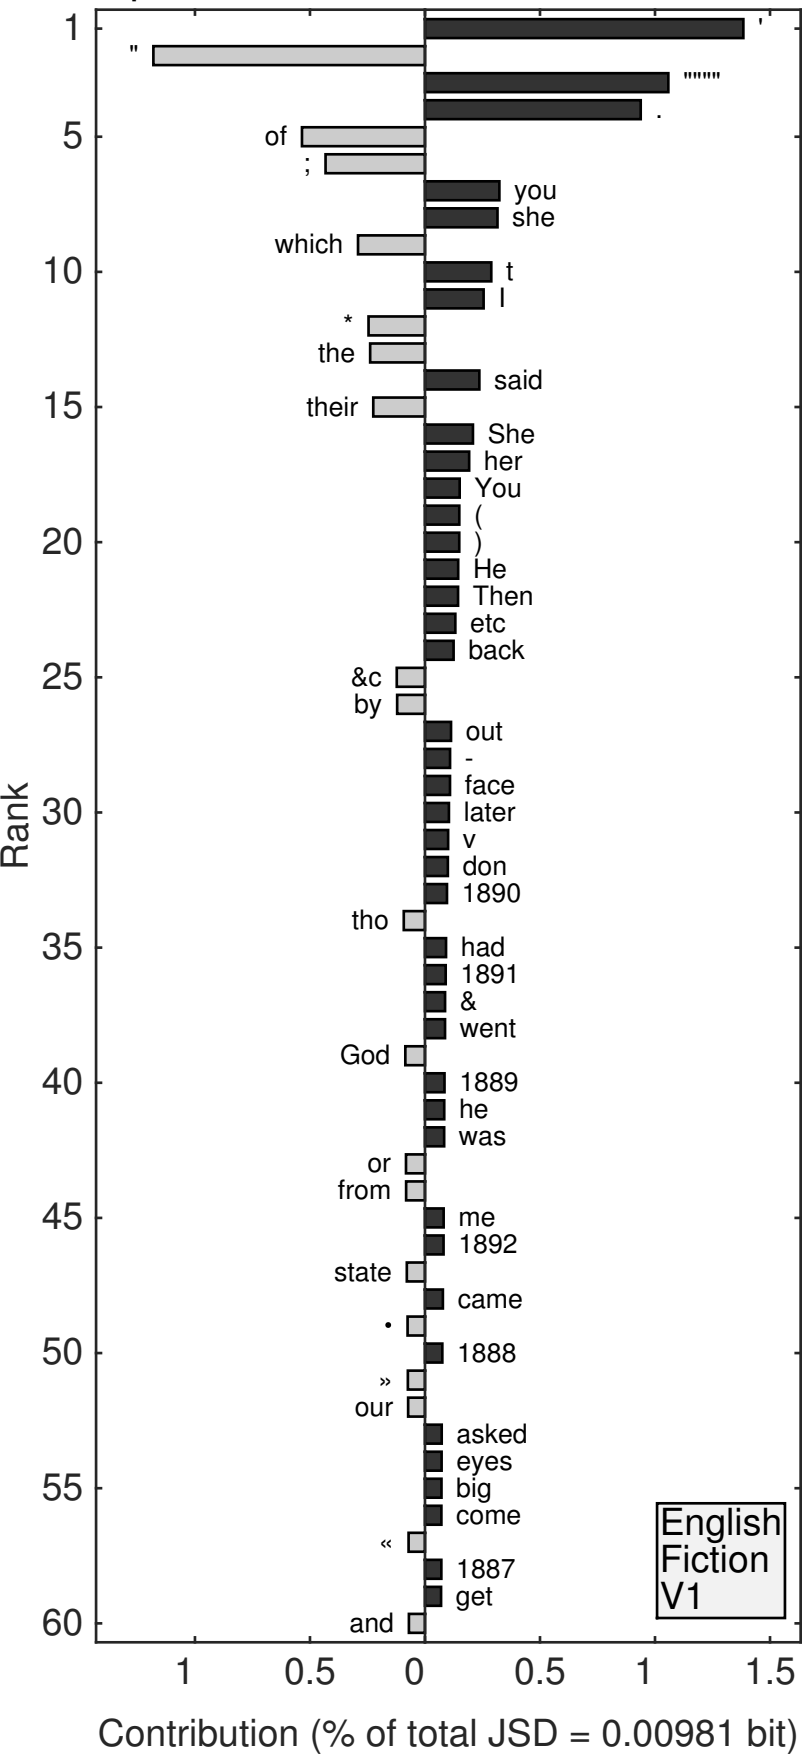

# Top JSD contributions: 1850s to 1900s

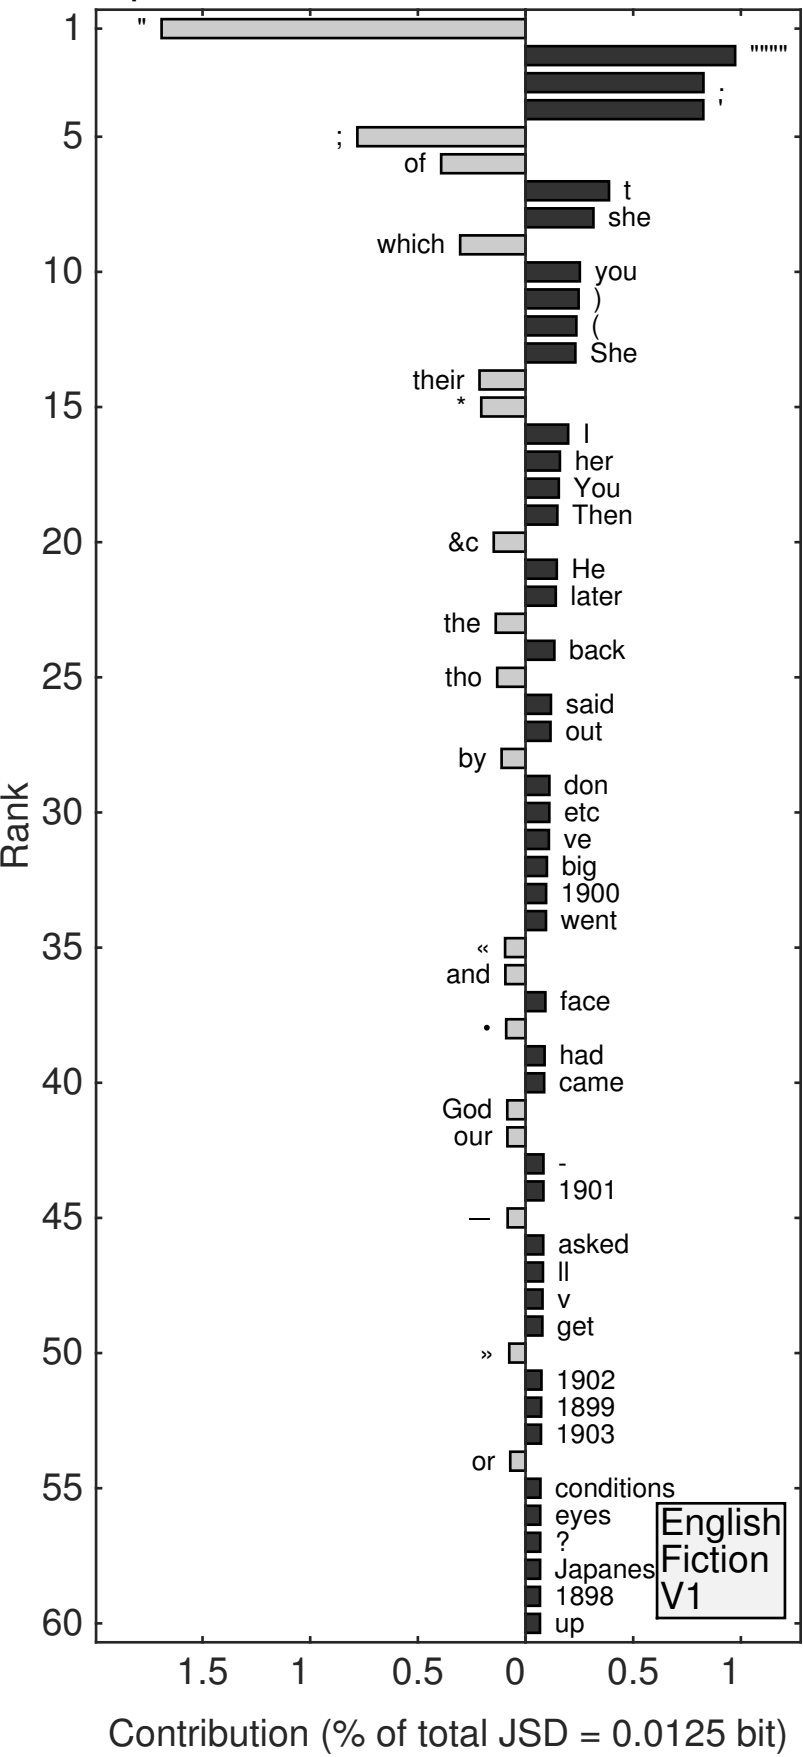

# Top JSD contributions: 1850s to 1910s

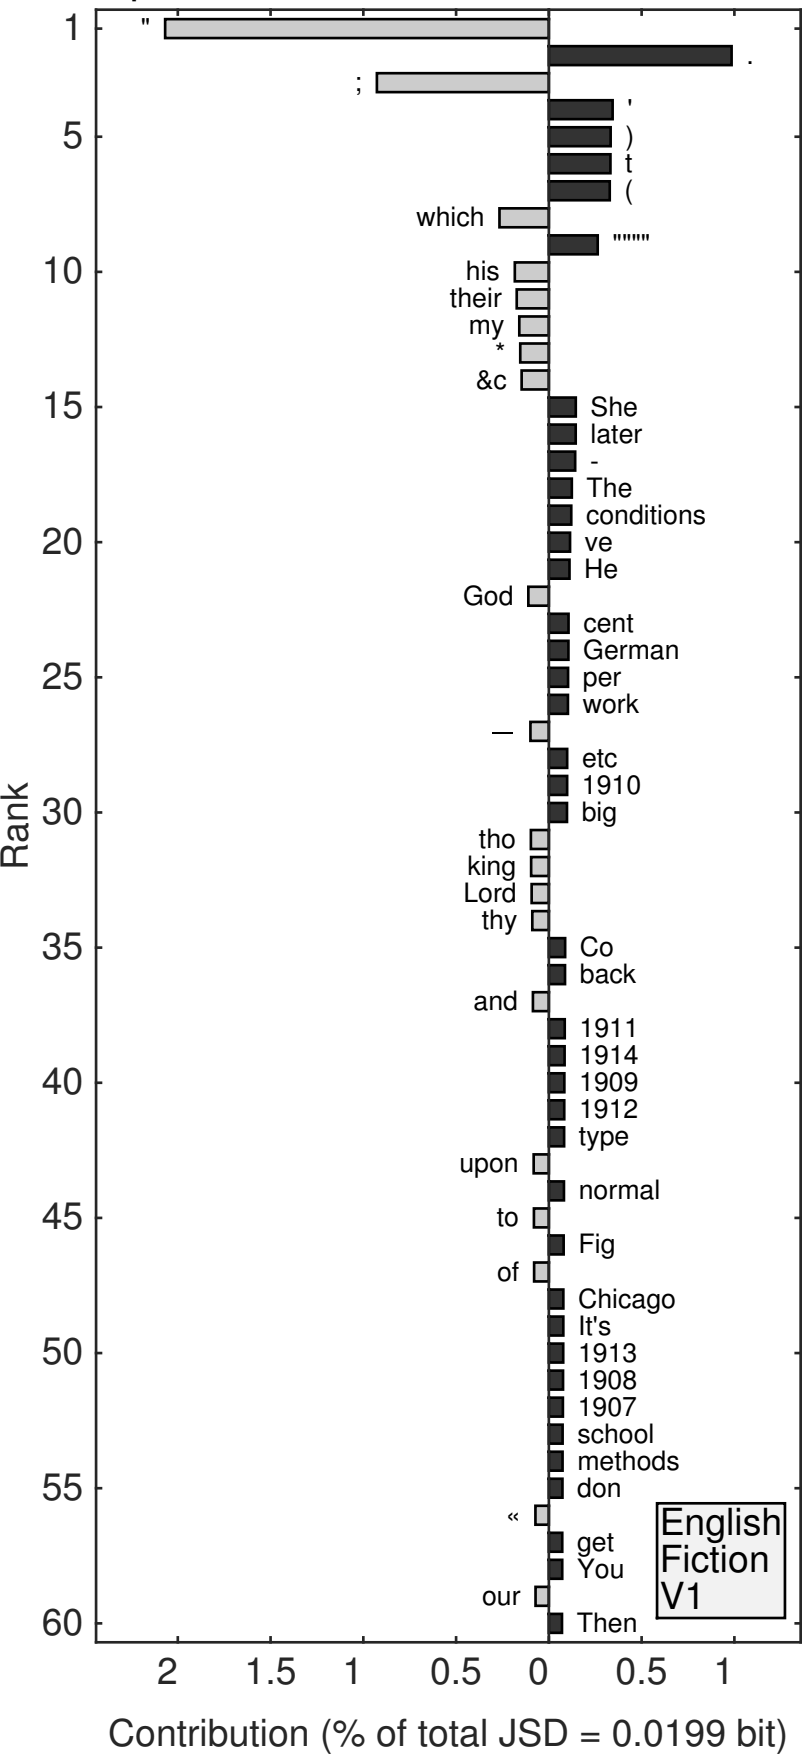

# Top JSD contributions: 1850s to 1920s

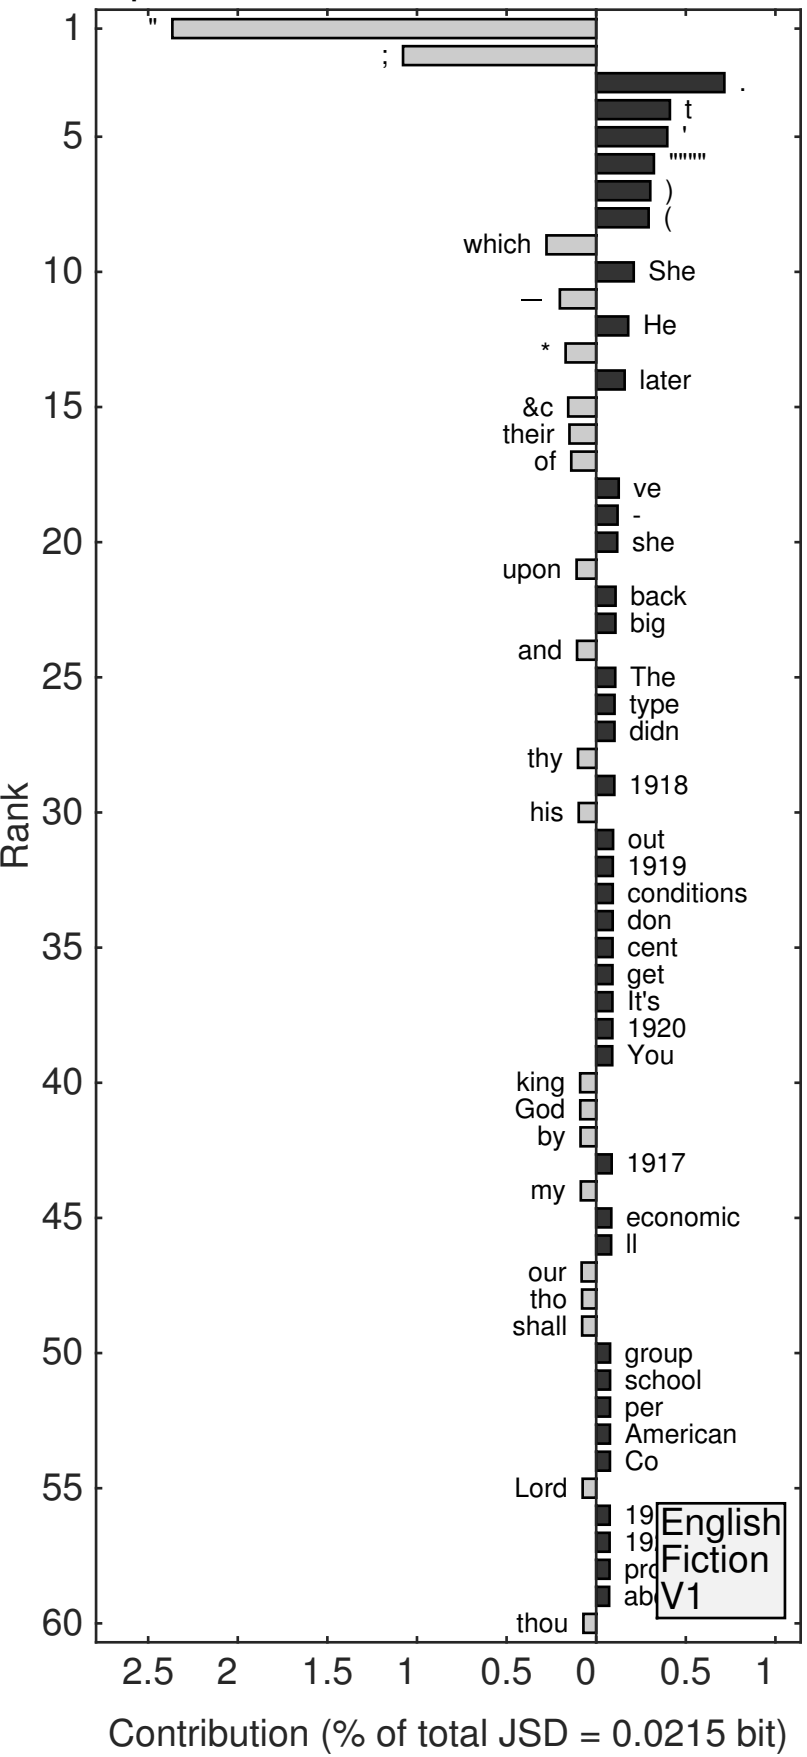

# Top JSD contributions: 1850s to 1930s

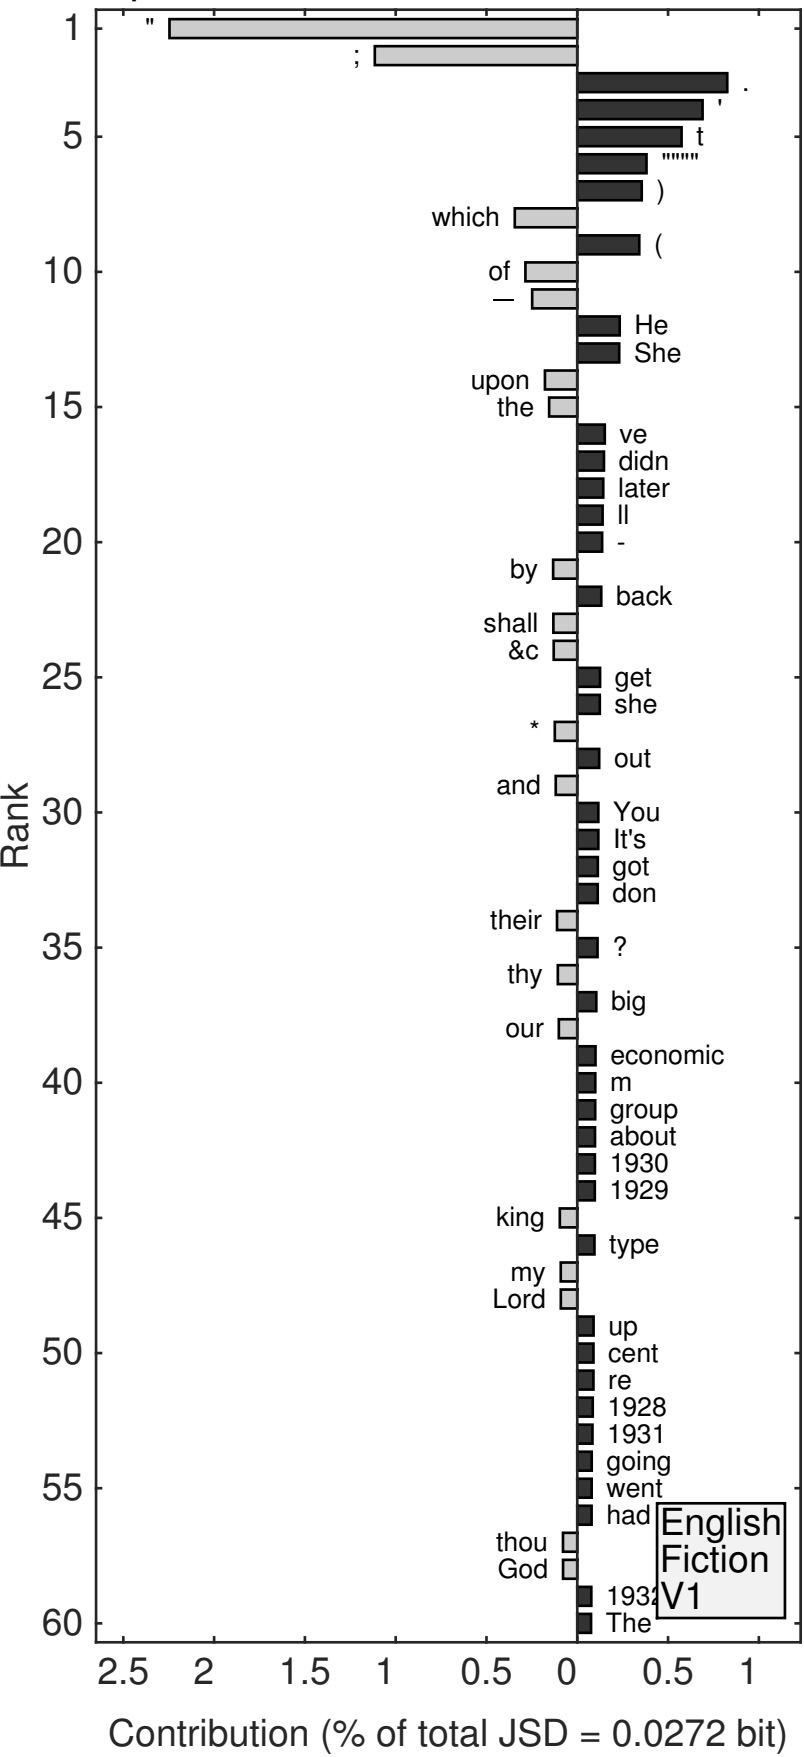

# Top JSD contributions: 1850s to 1940s

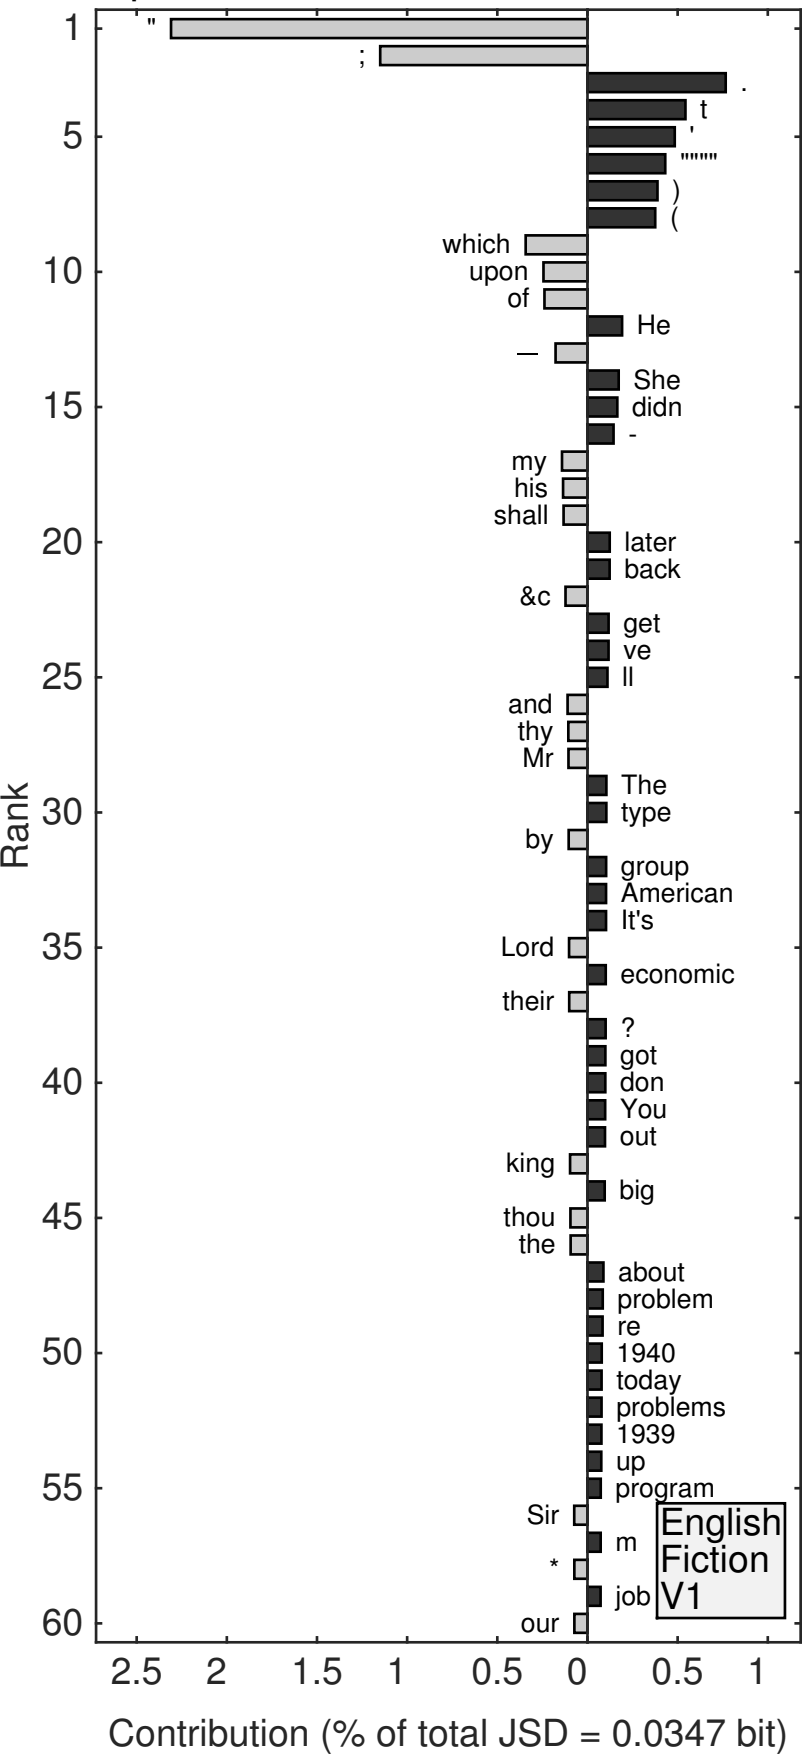

English Fiction V1

# Top JSD contributions: 1850s to 1950s

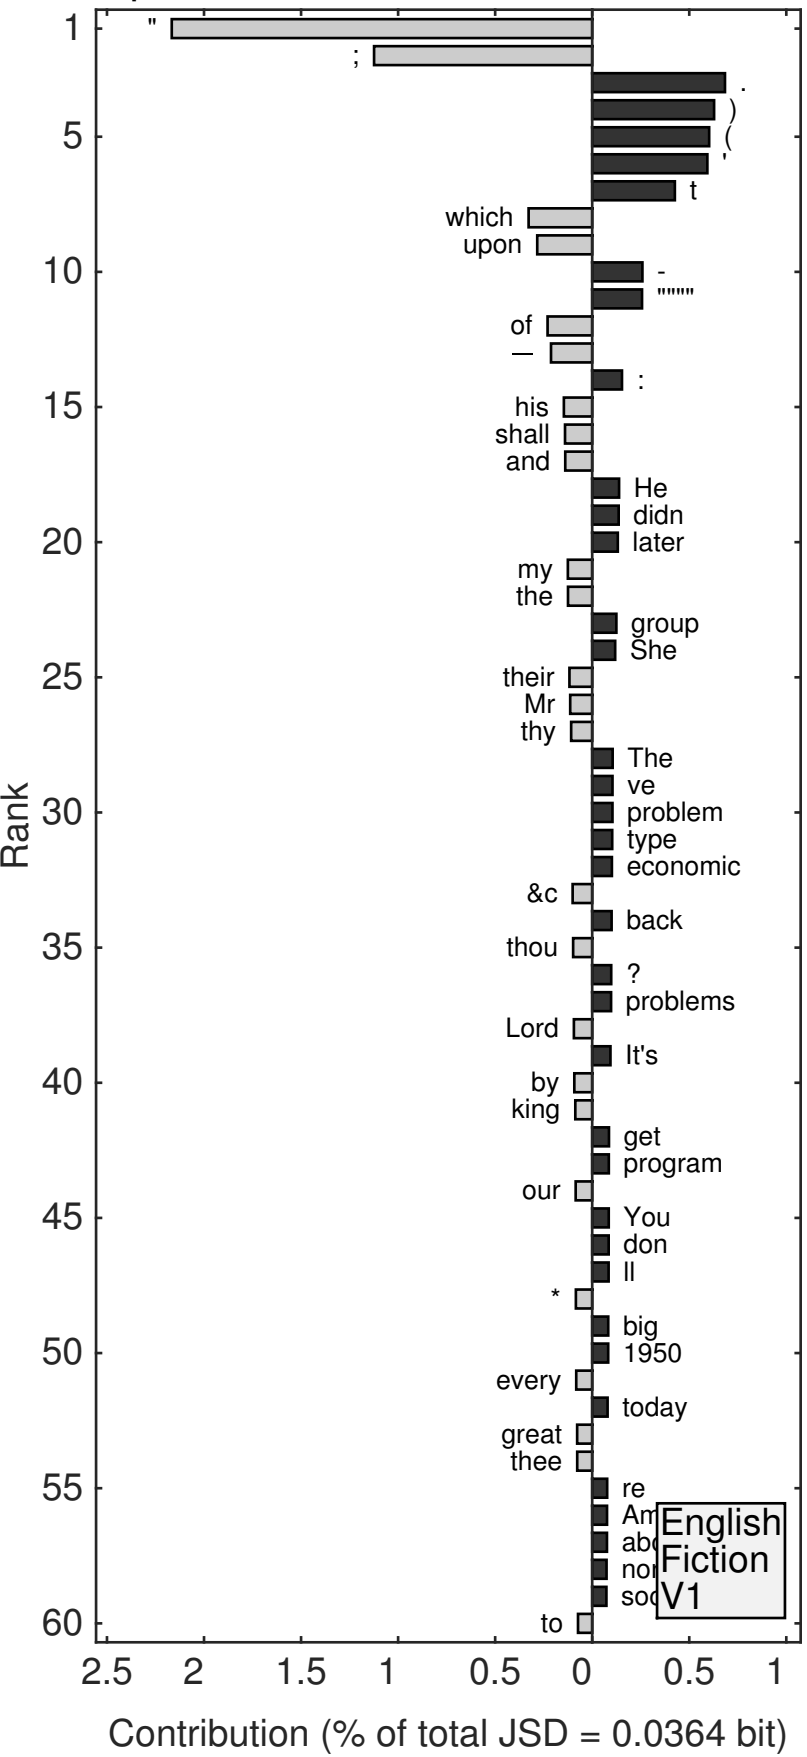

# Top JSD contributions: 1850s to 1960s

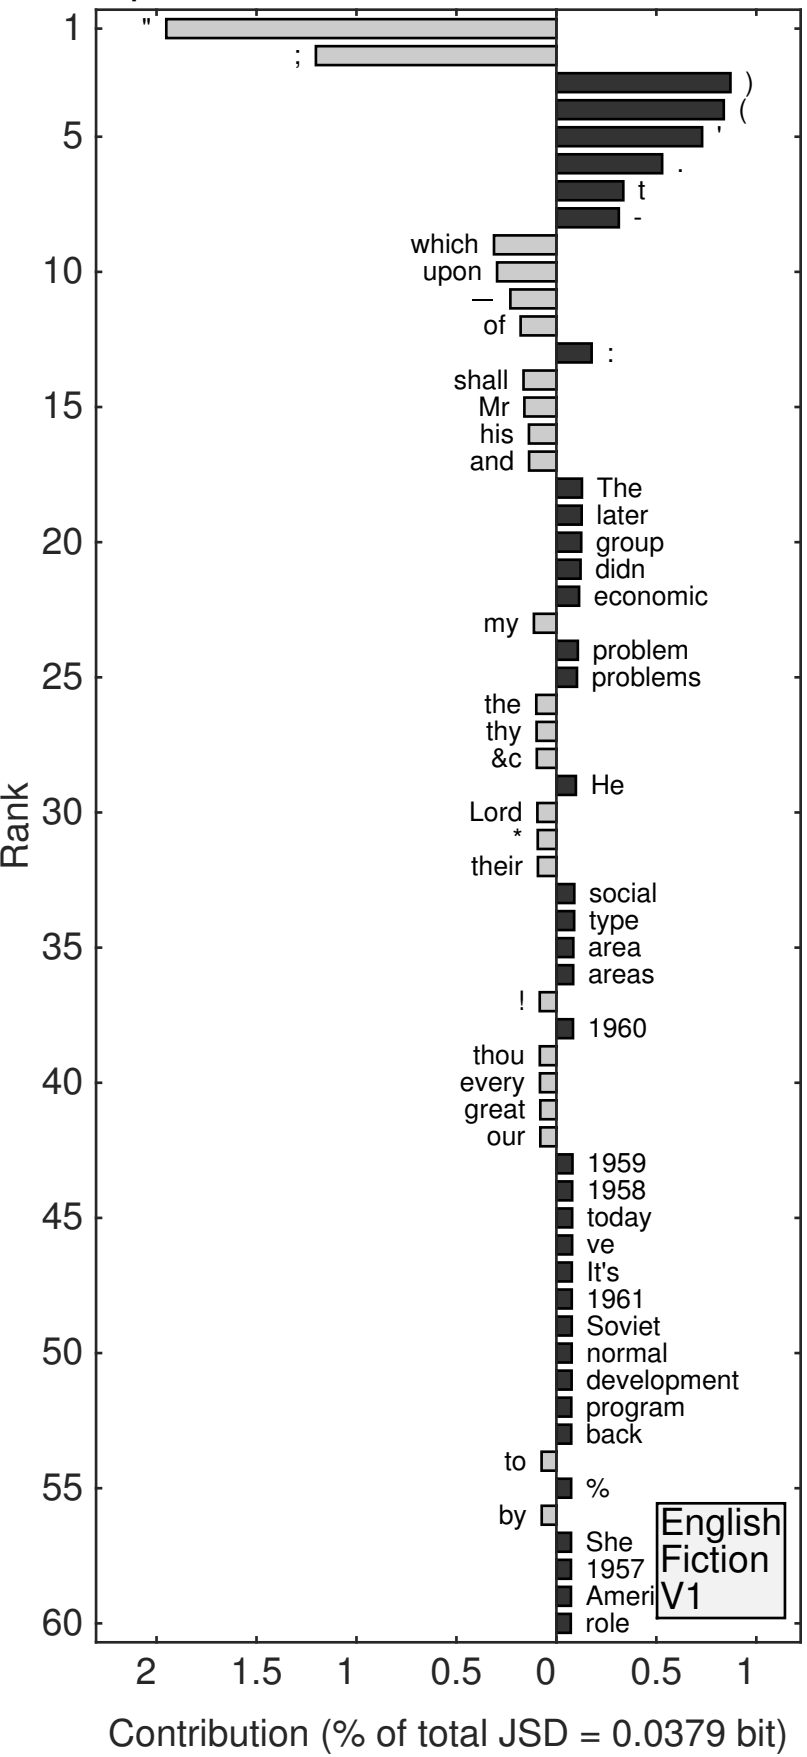

English Fiction V1



# Top JSD contributions: 1850s to 1970s

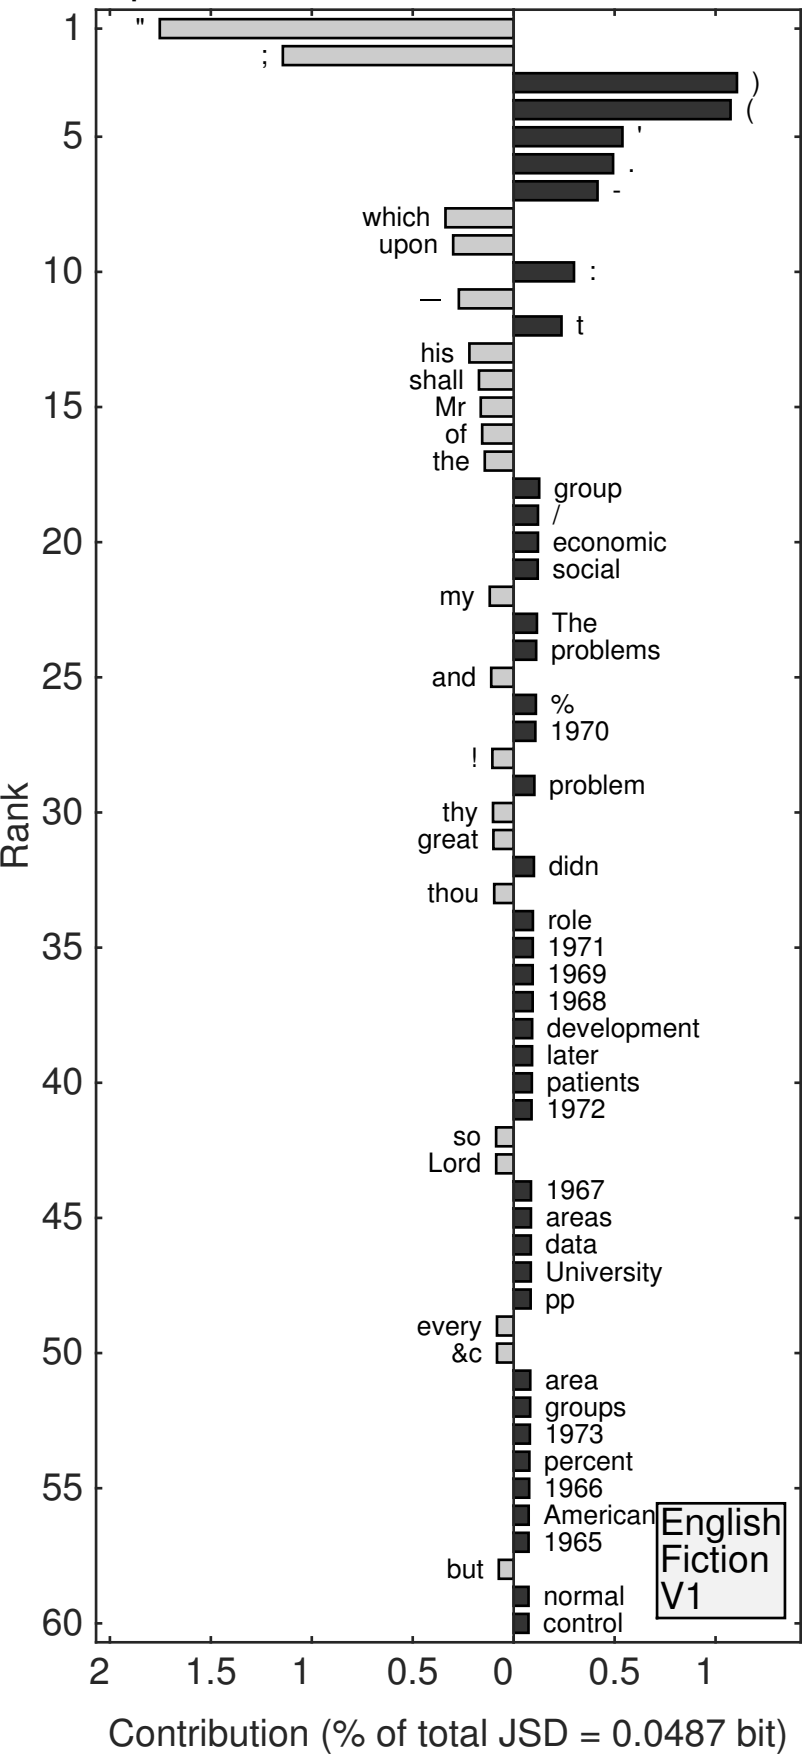

# Top JSD contributions: 1850s to 1980s

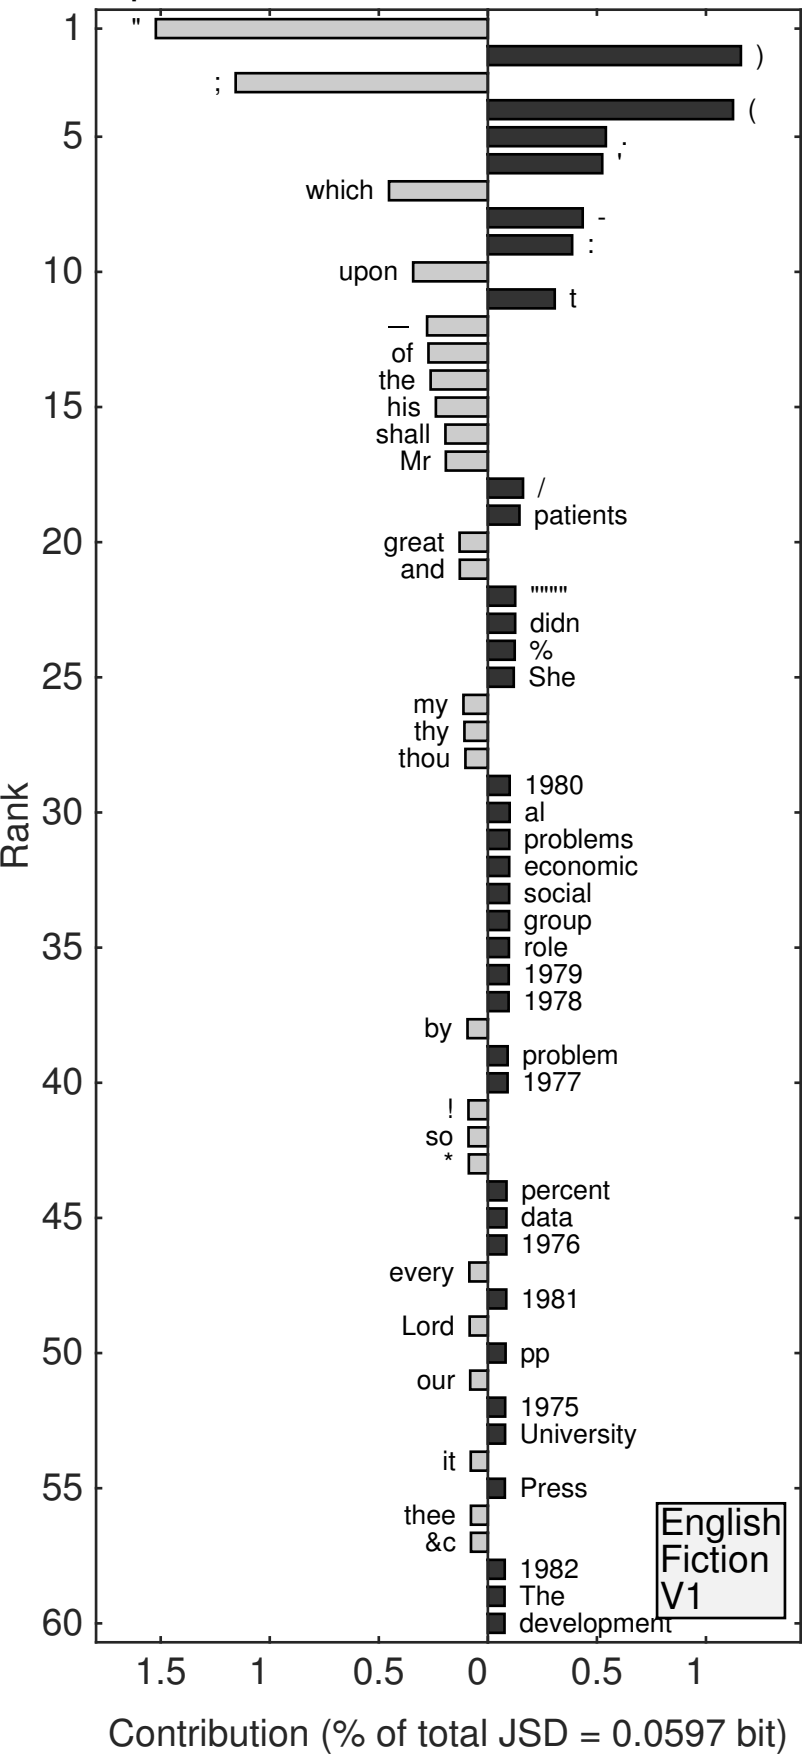

# Top JSD contributions: 1850s to 1990s

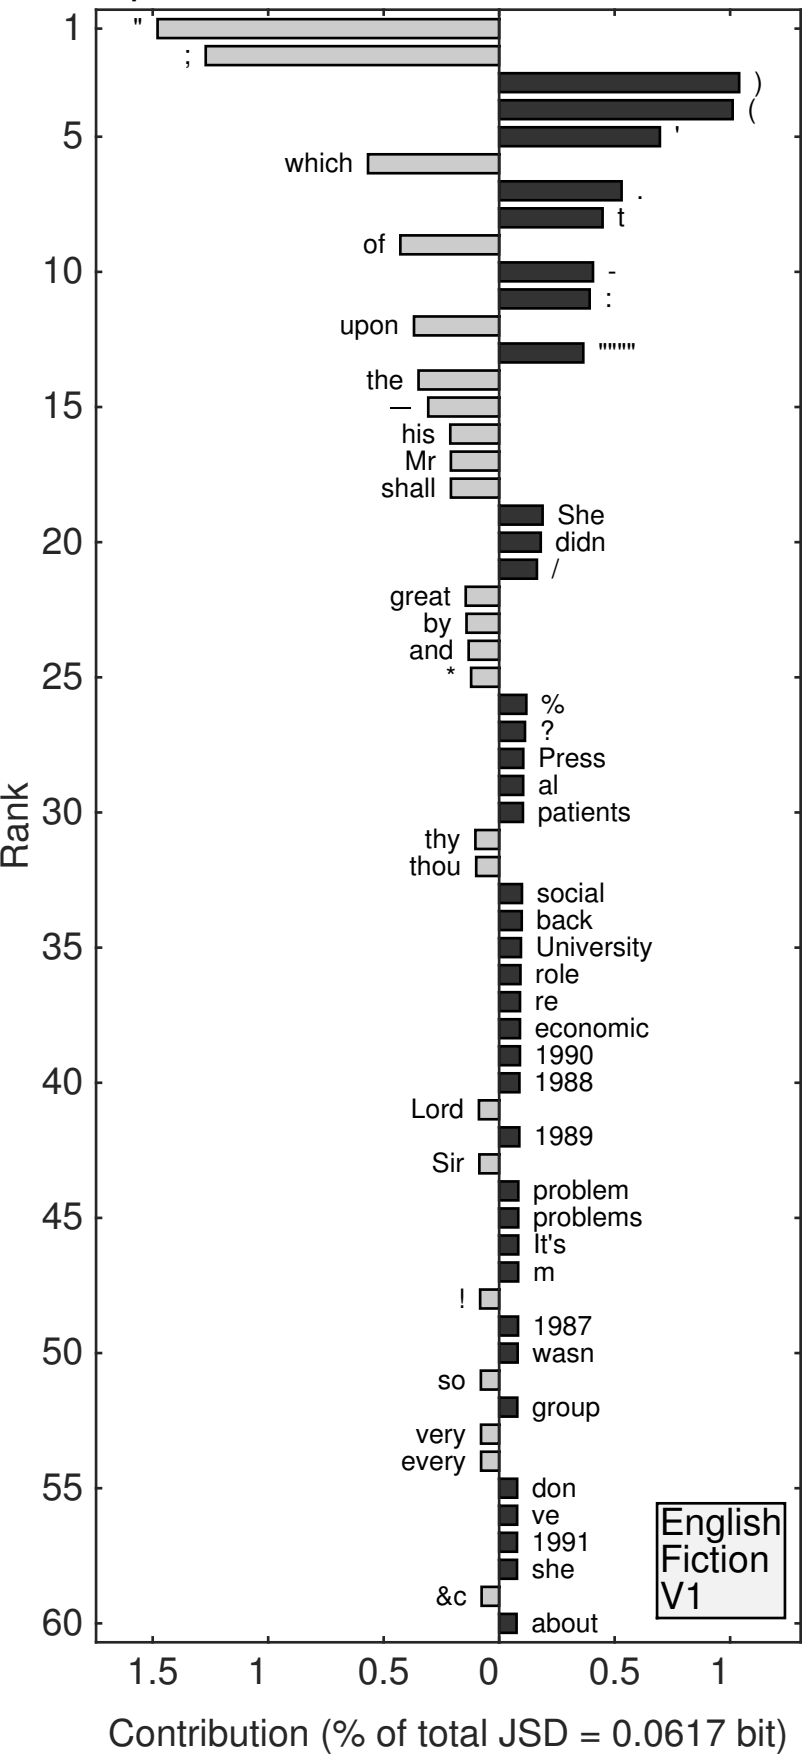

# Top JSD contributions: 1860s to 1870s

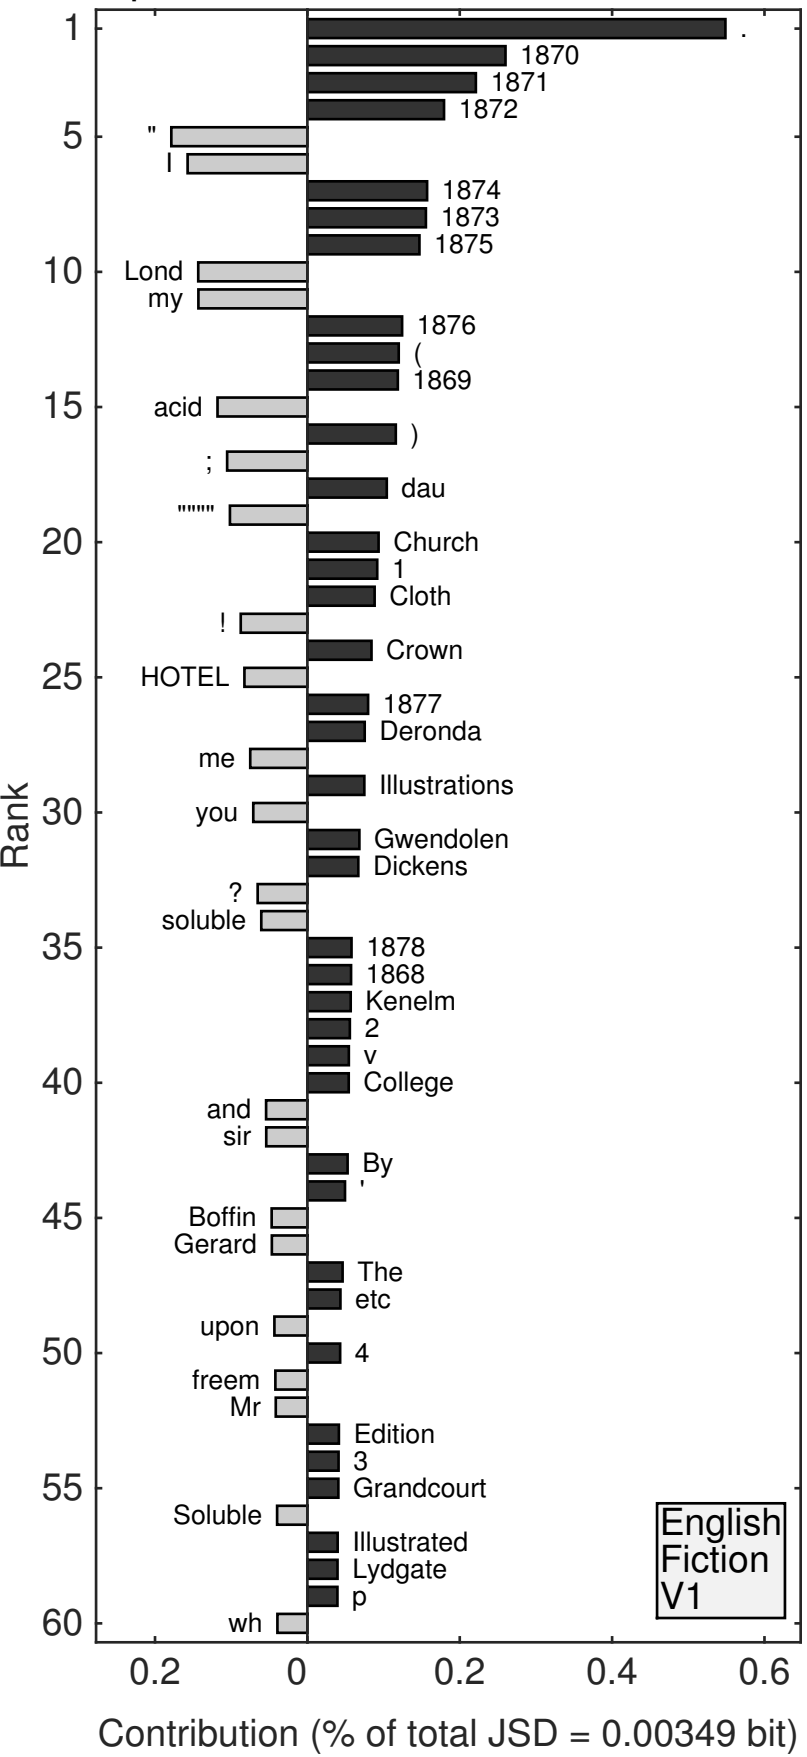

# Top JSD contributions: 1860s to 1880s

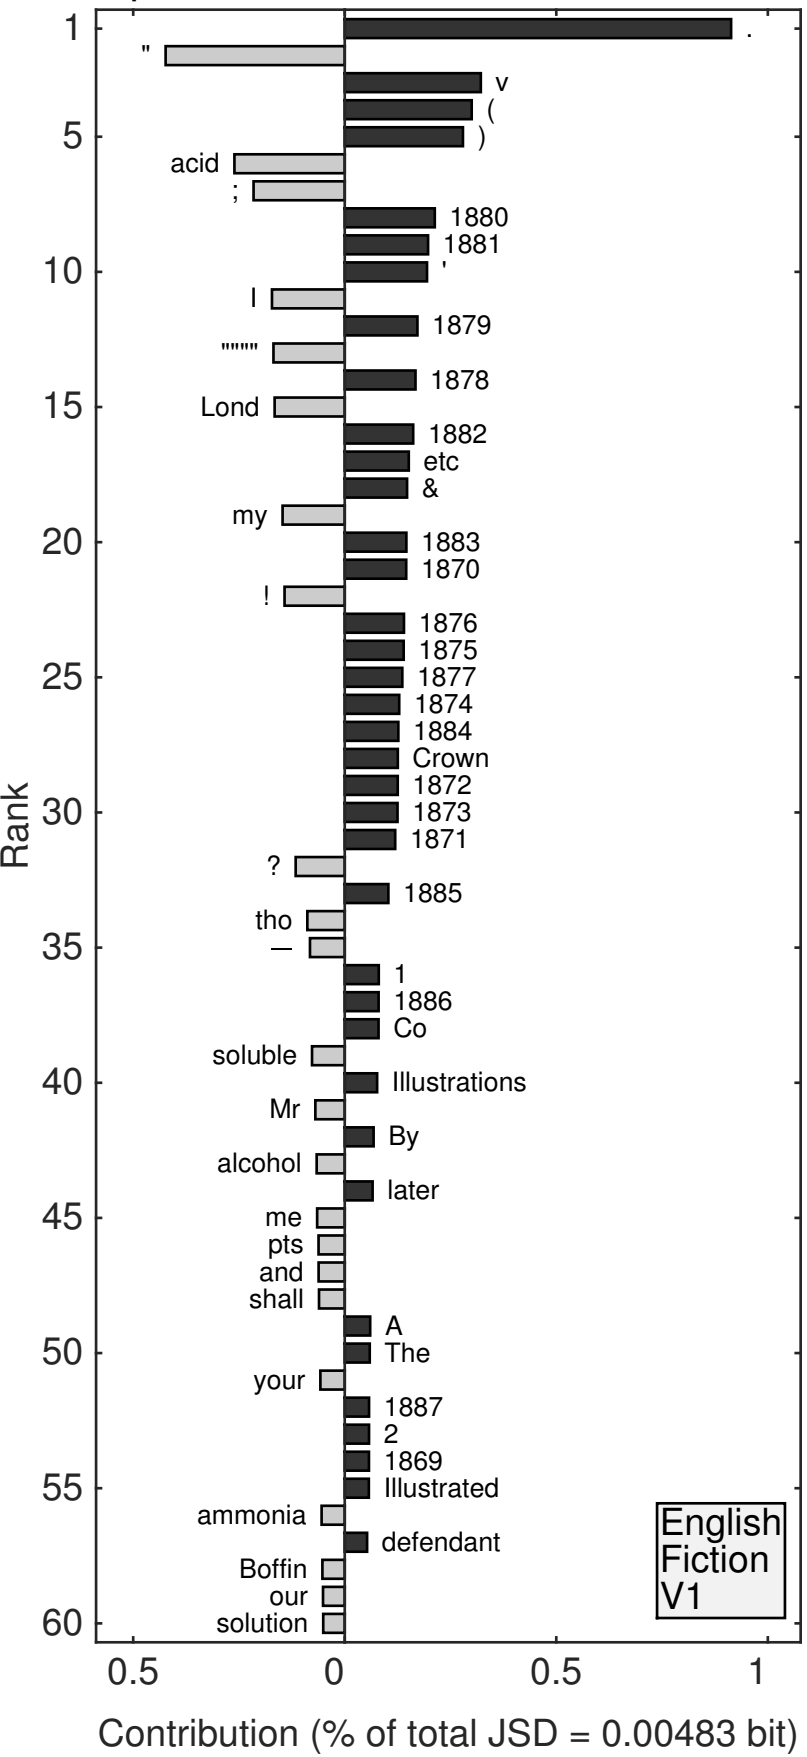

English Fiction V1

Contribution (% of total JSD = 0.00483 bit)

# Top JSD contributions: 1860s to 1890s

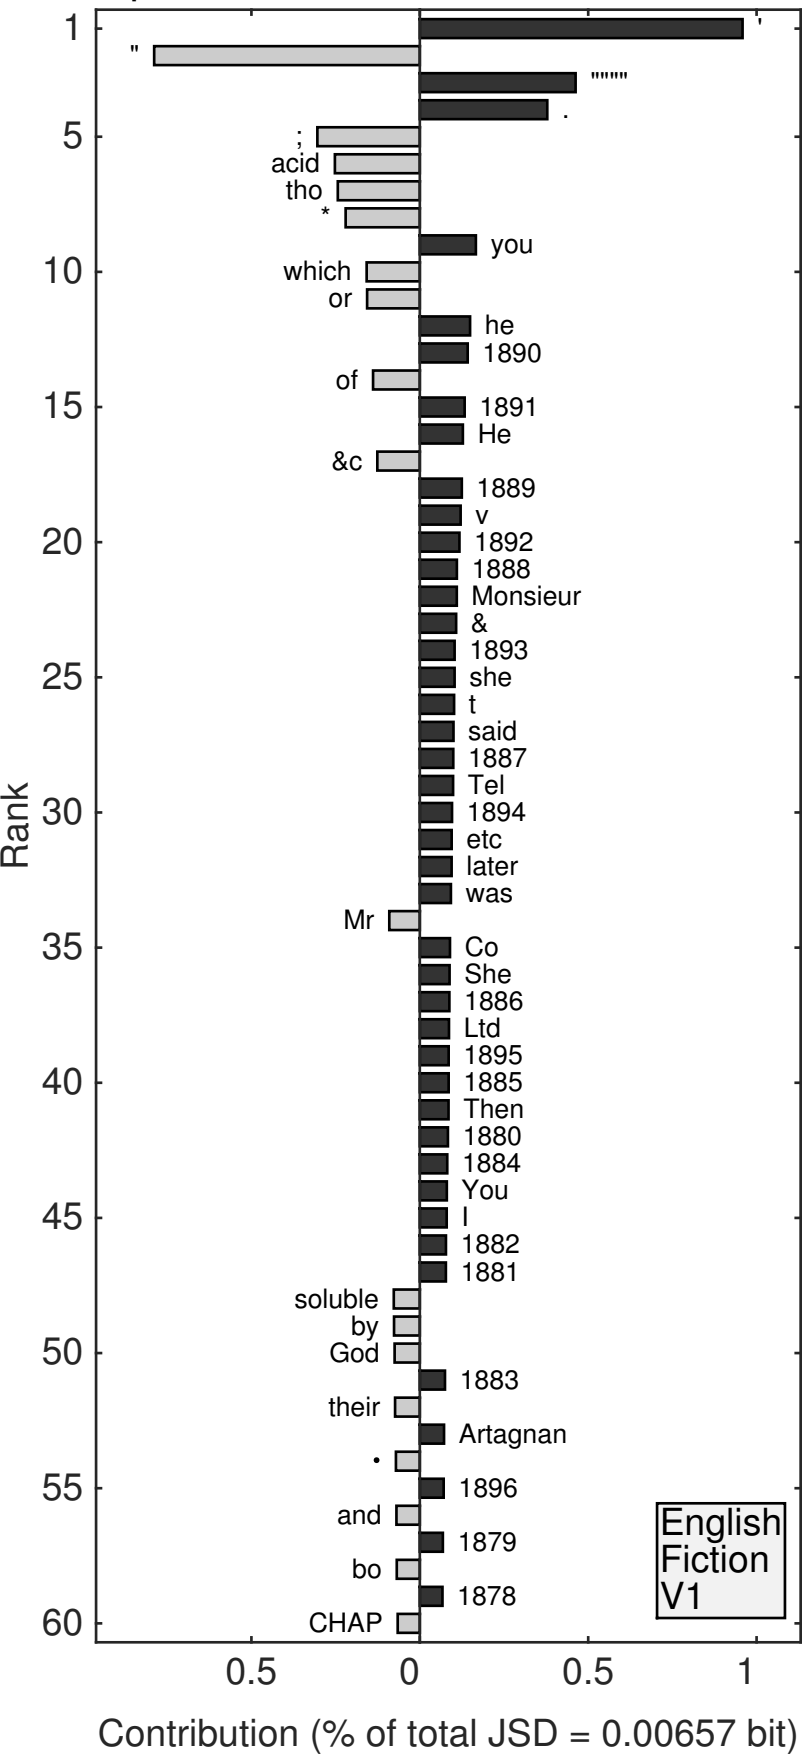

English Fiction V1

# Top JSD contributions: 1860s to 1900s

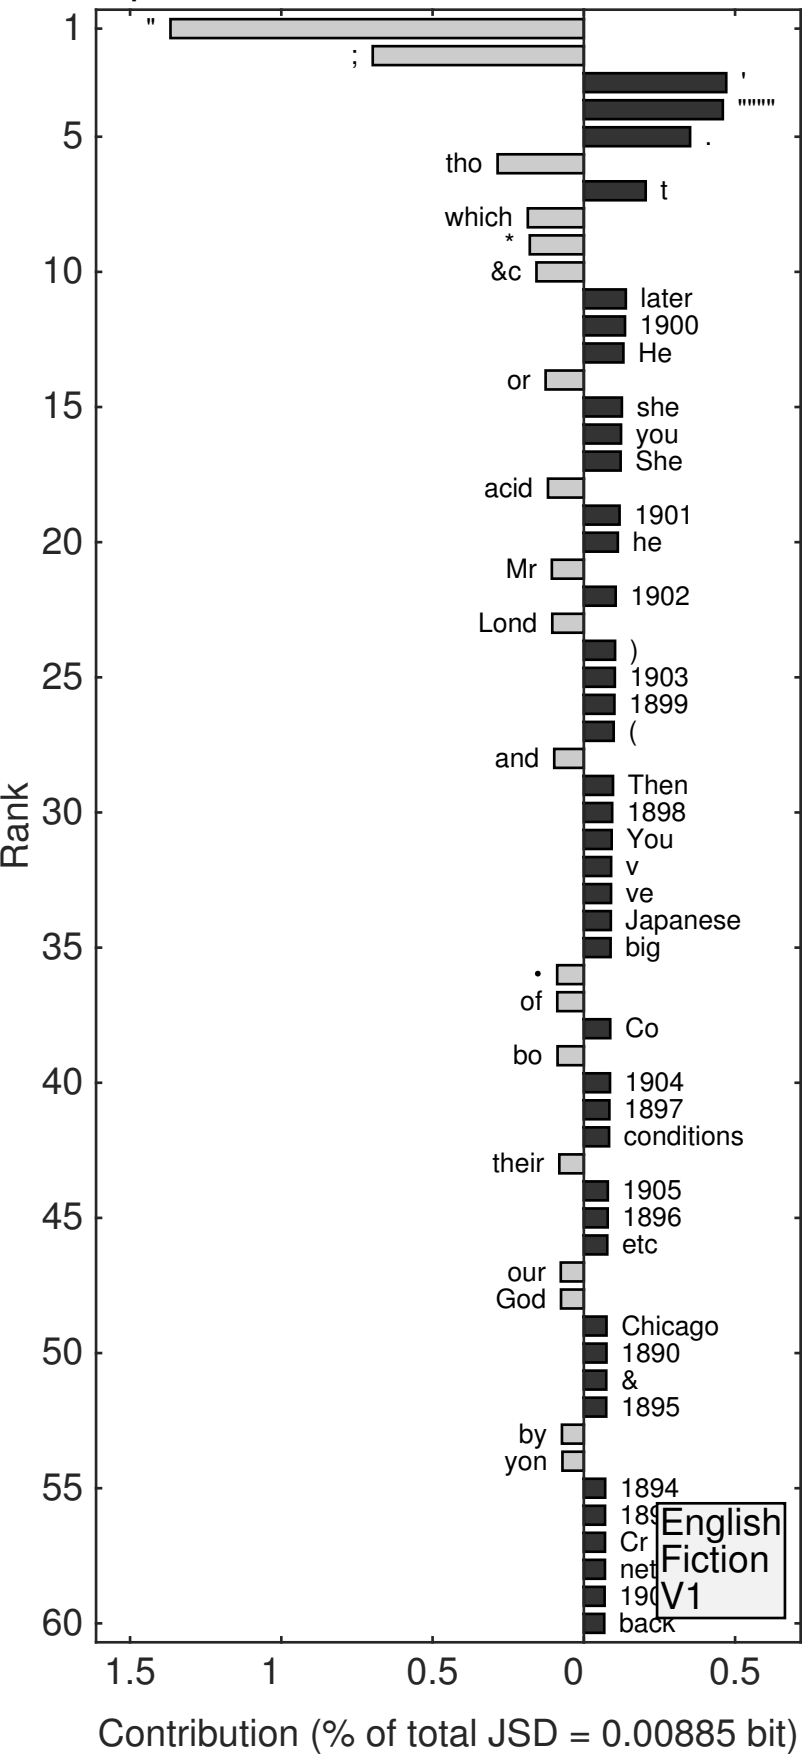

# Top JSD contributions: 1860s to 1910s

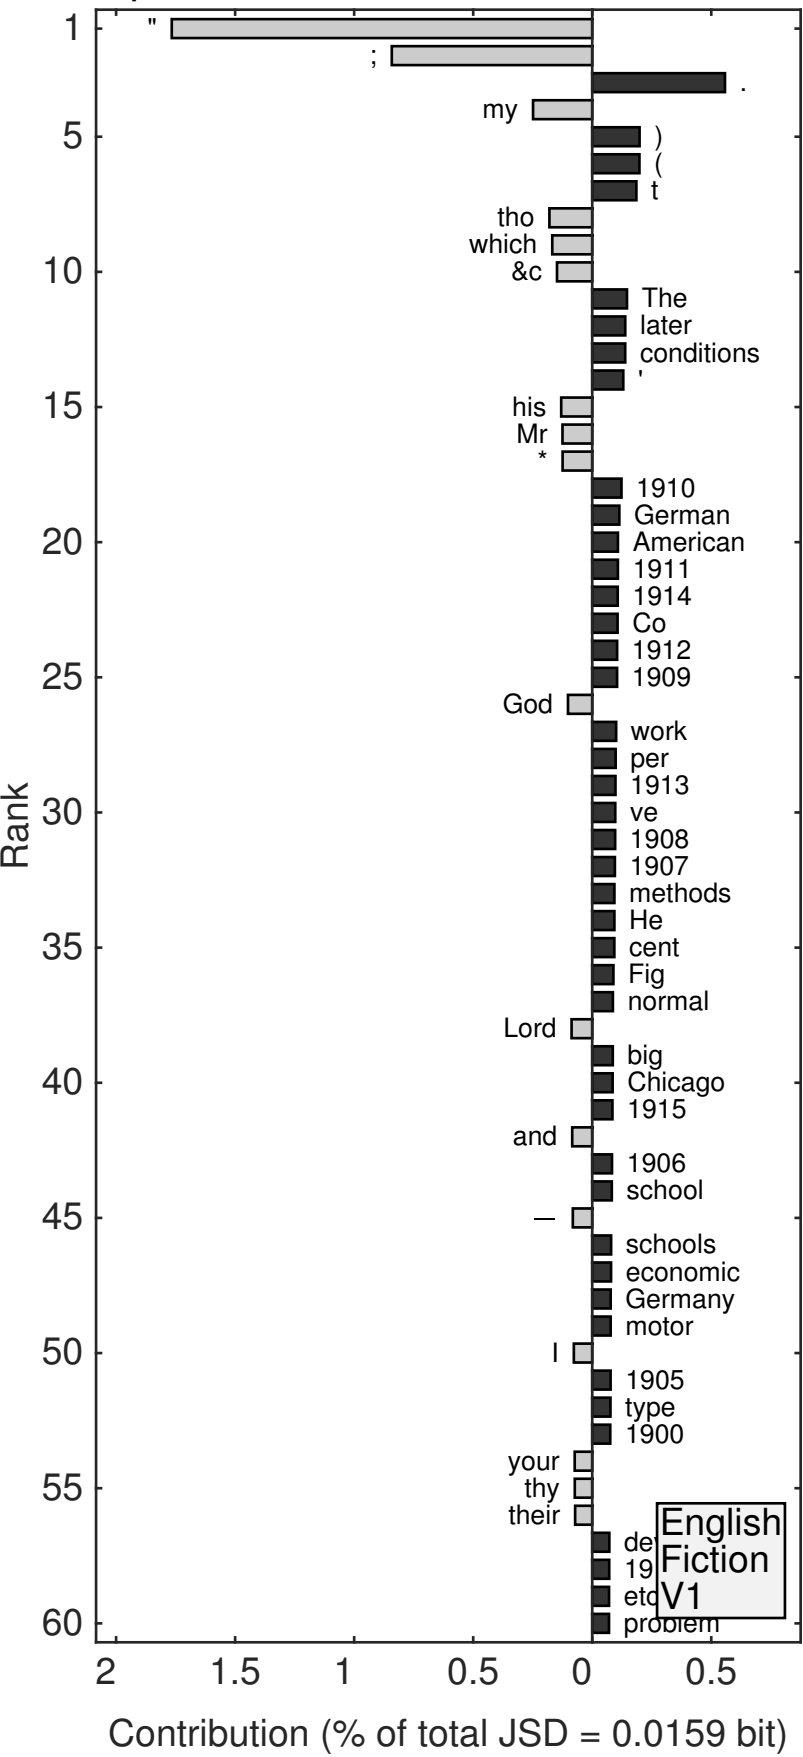



# Top JSD contributions: 1860s to 1920s

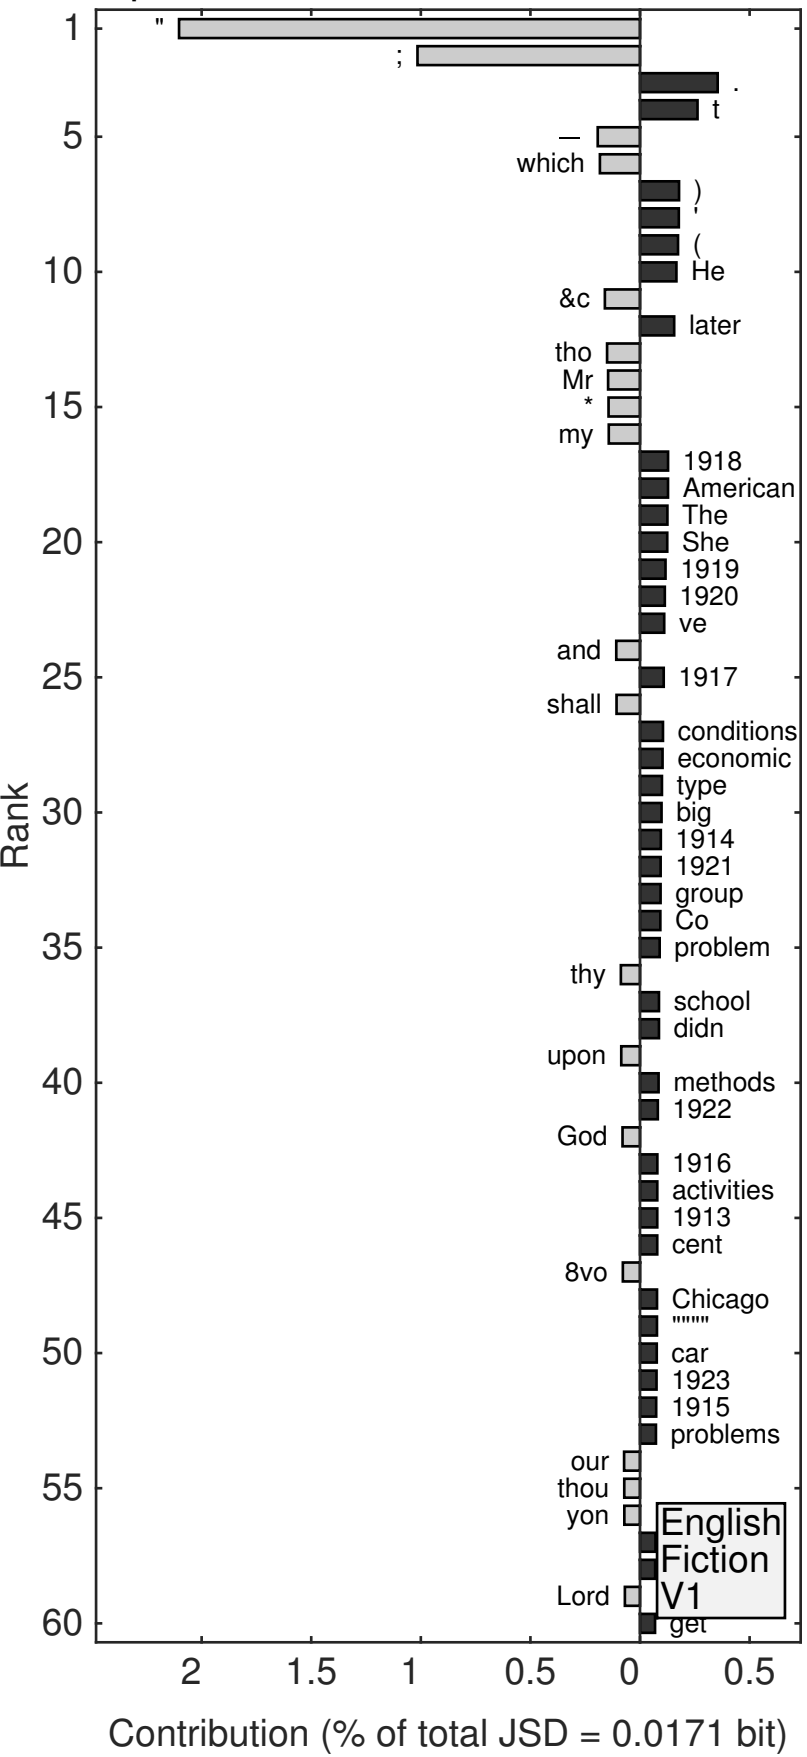

# Top JSD contributions: 1860s to 1930s

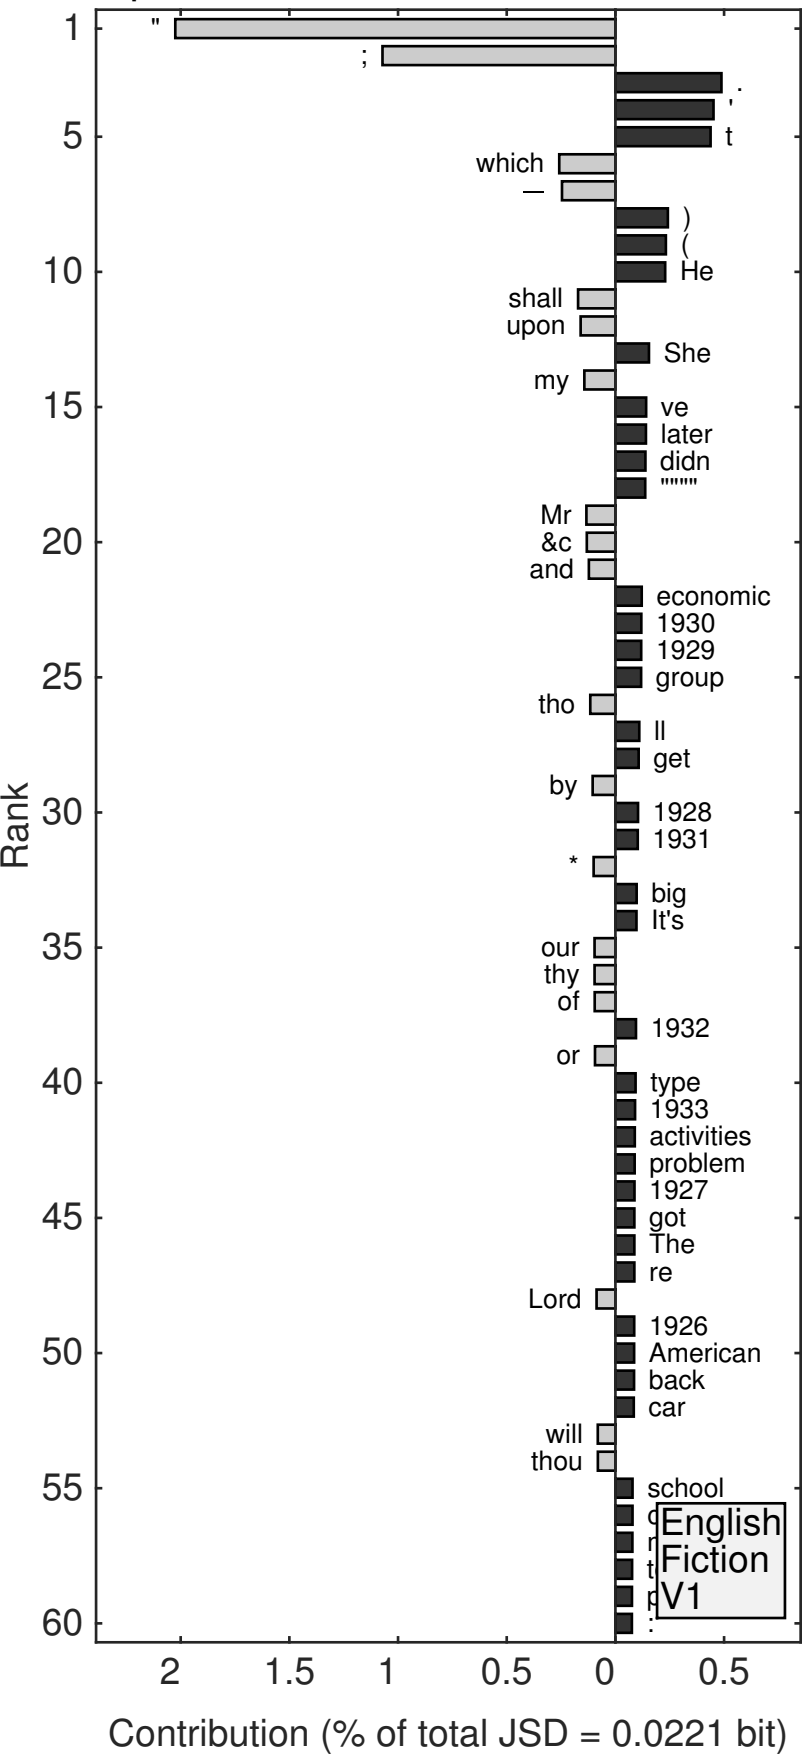

# Top JSD contributions: 1860s to 1940s

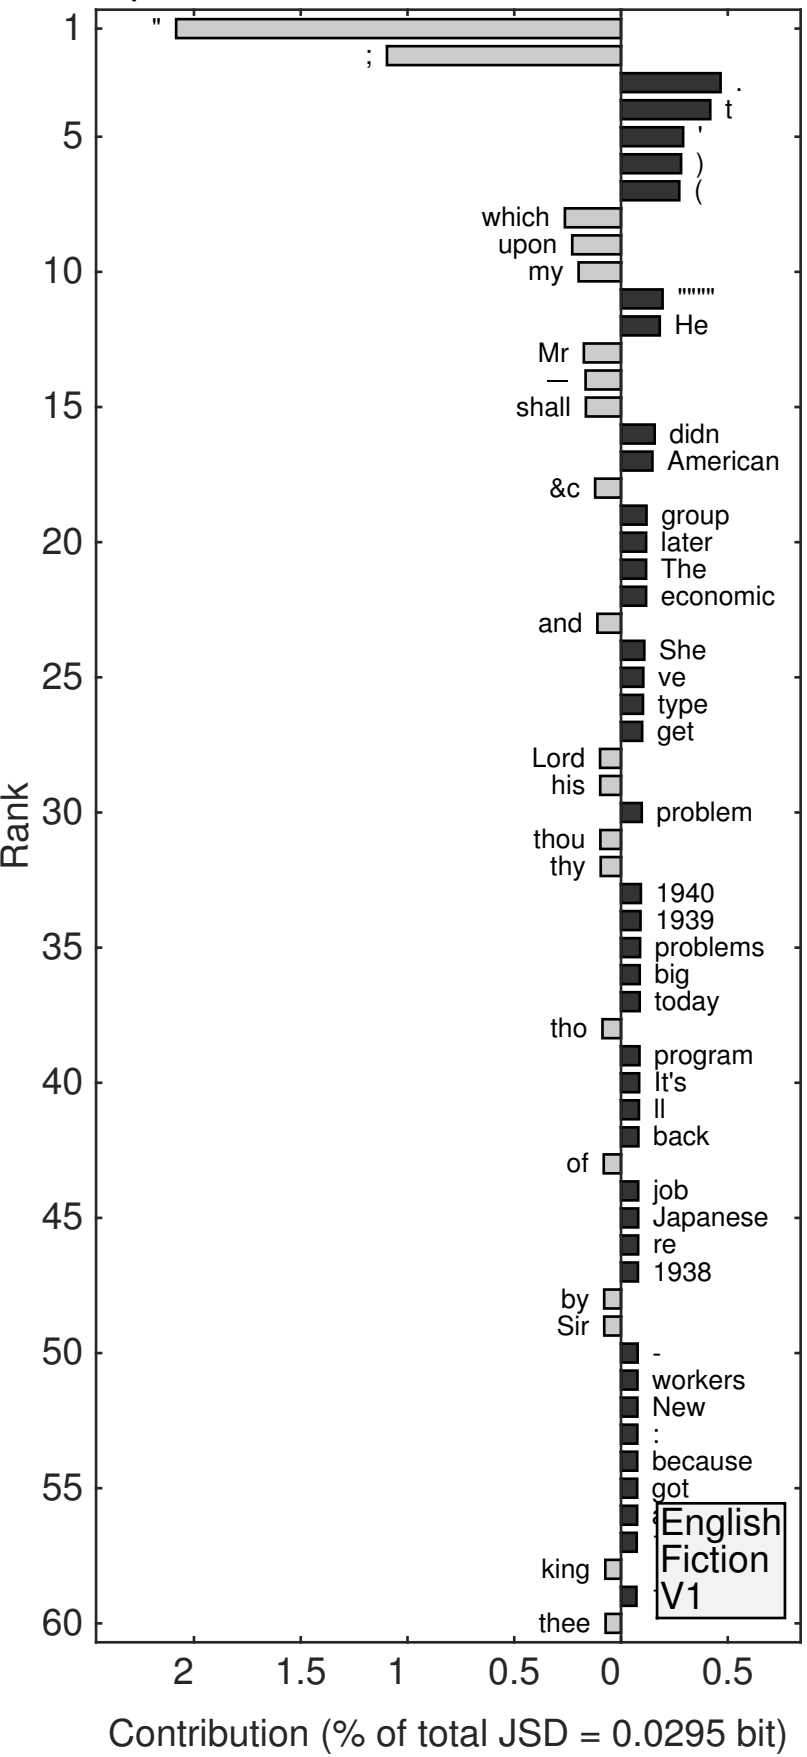

# Top JSD contributions: 1860s to 1950s

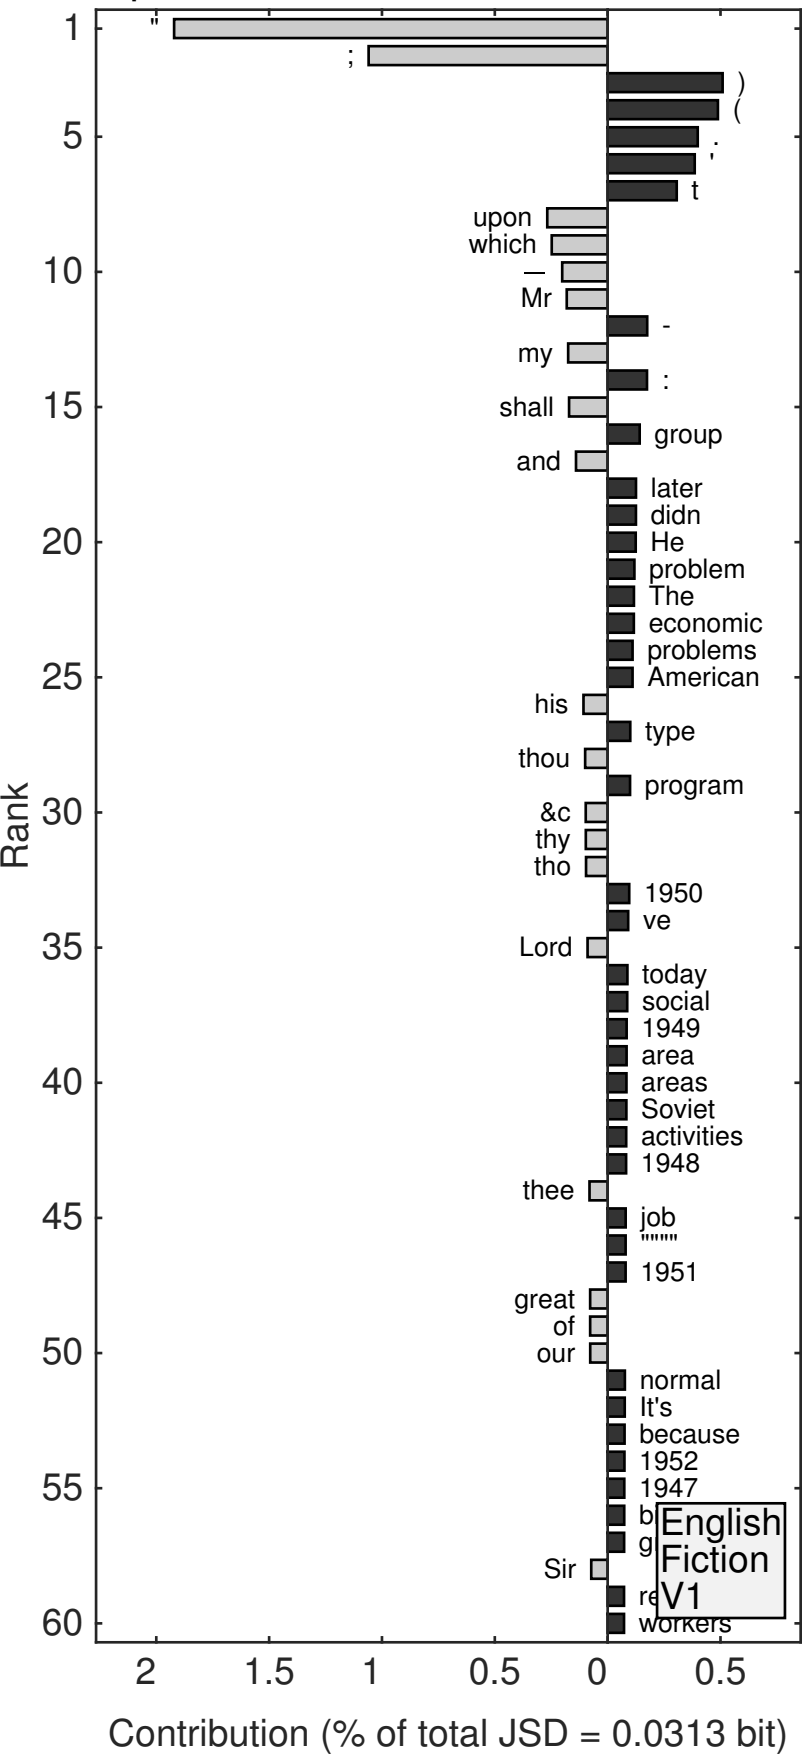

# Top JSD contributions: 1860s to 1960s

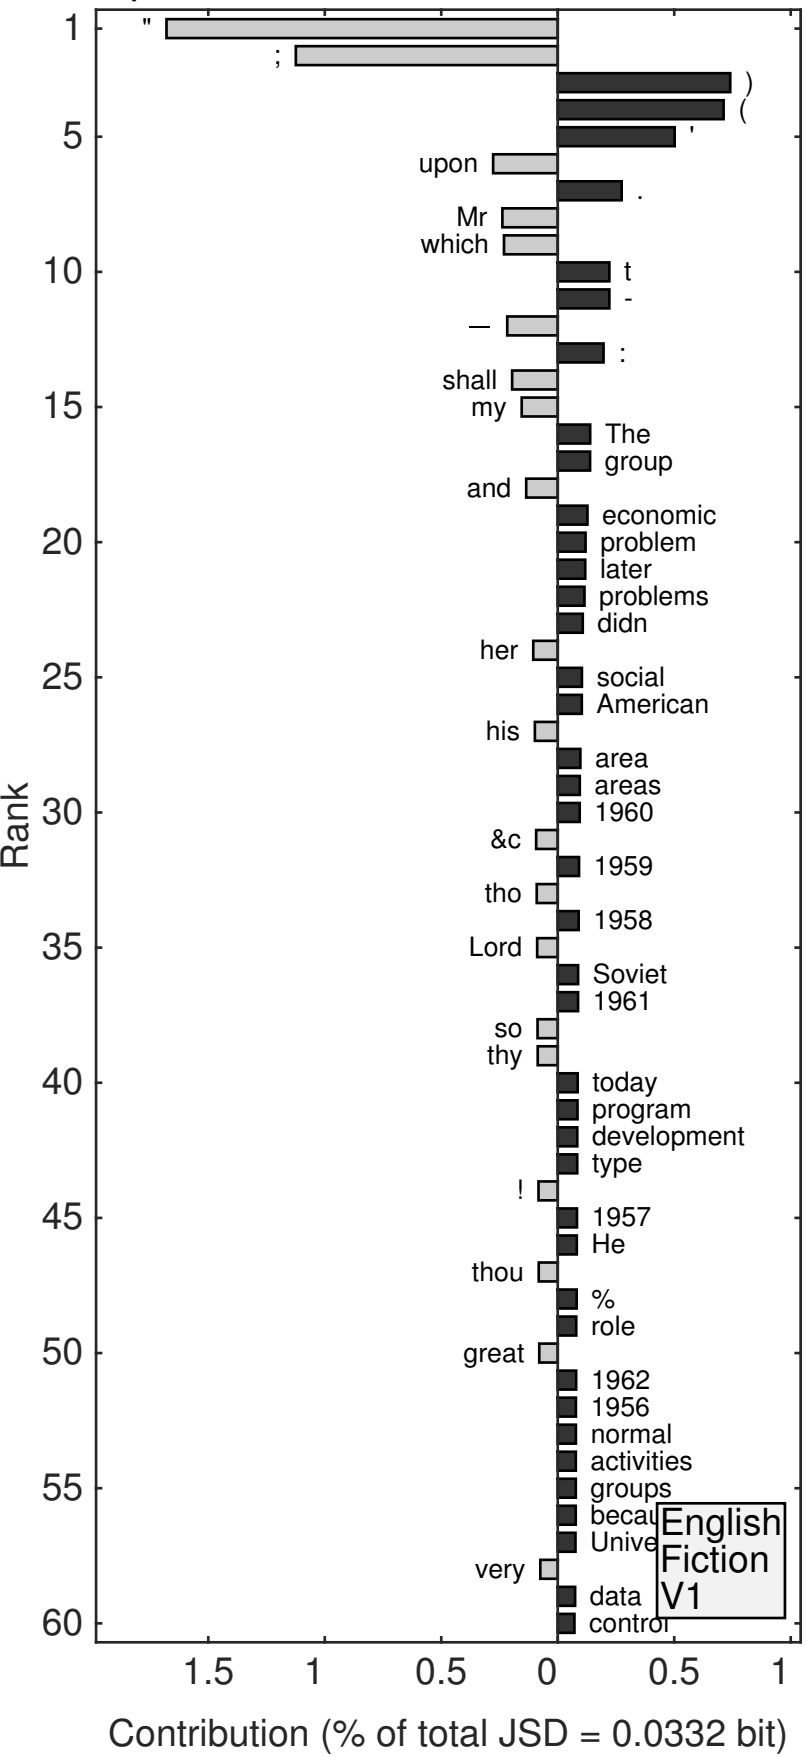

English Fiction V1

# Top JSD contributions: 1860s to 1970s

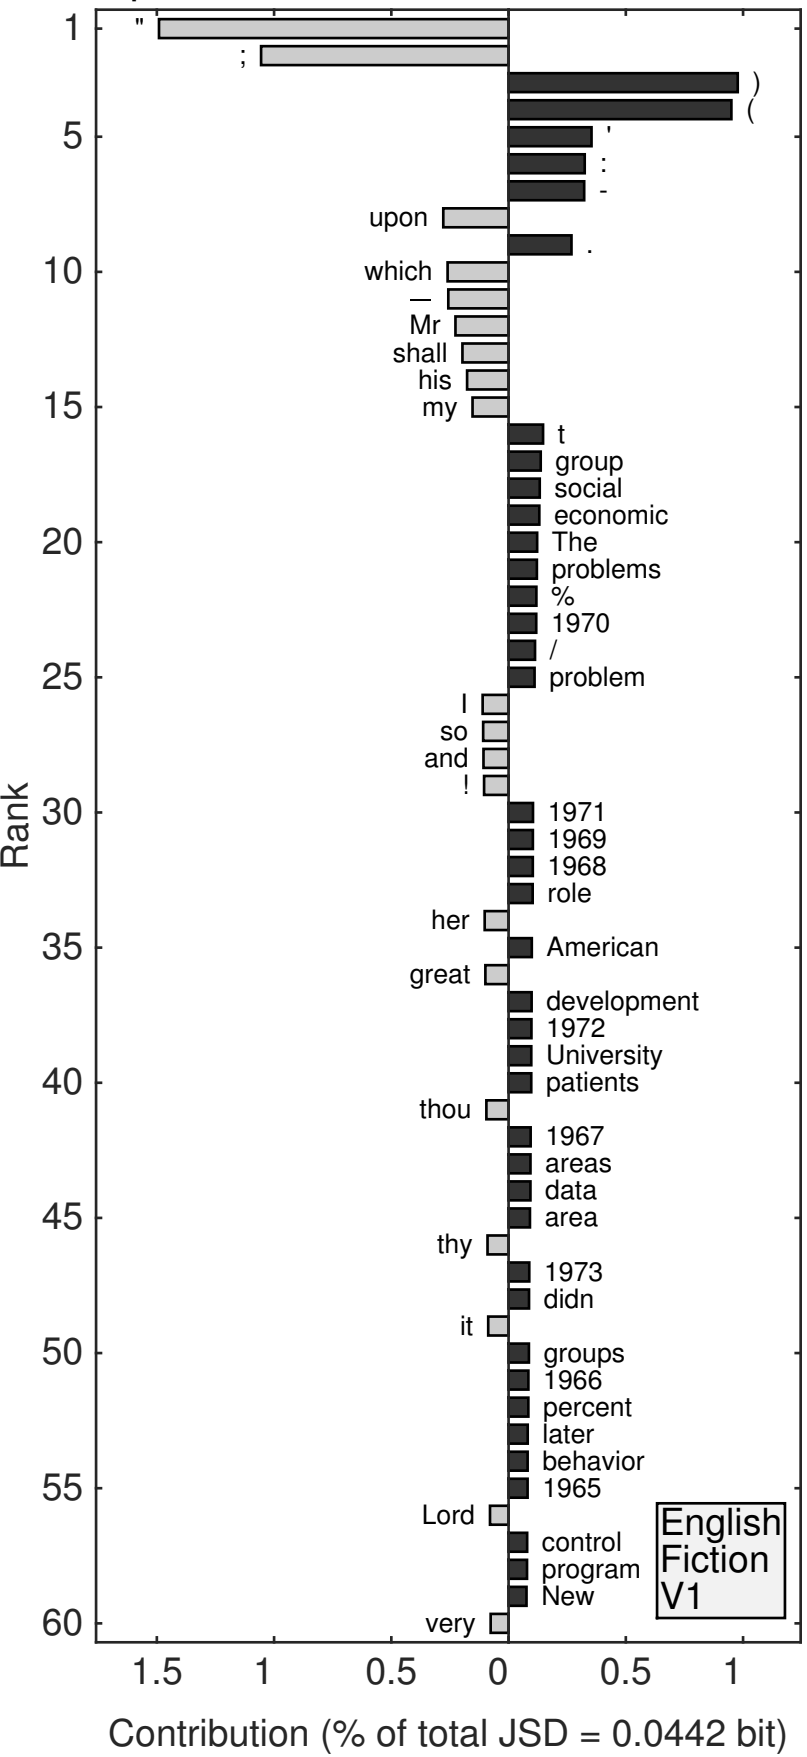

# Top JSD contributions: 1860s to 1980s

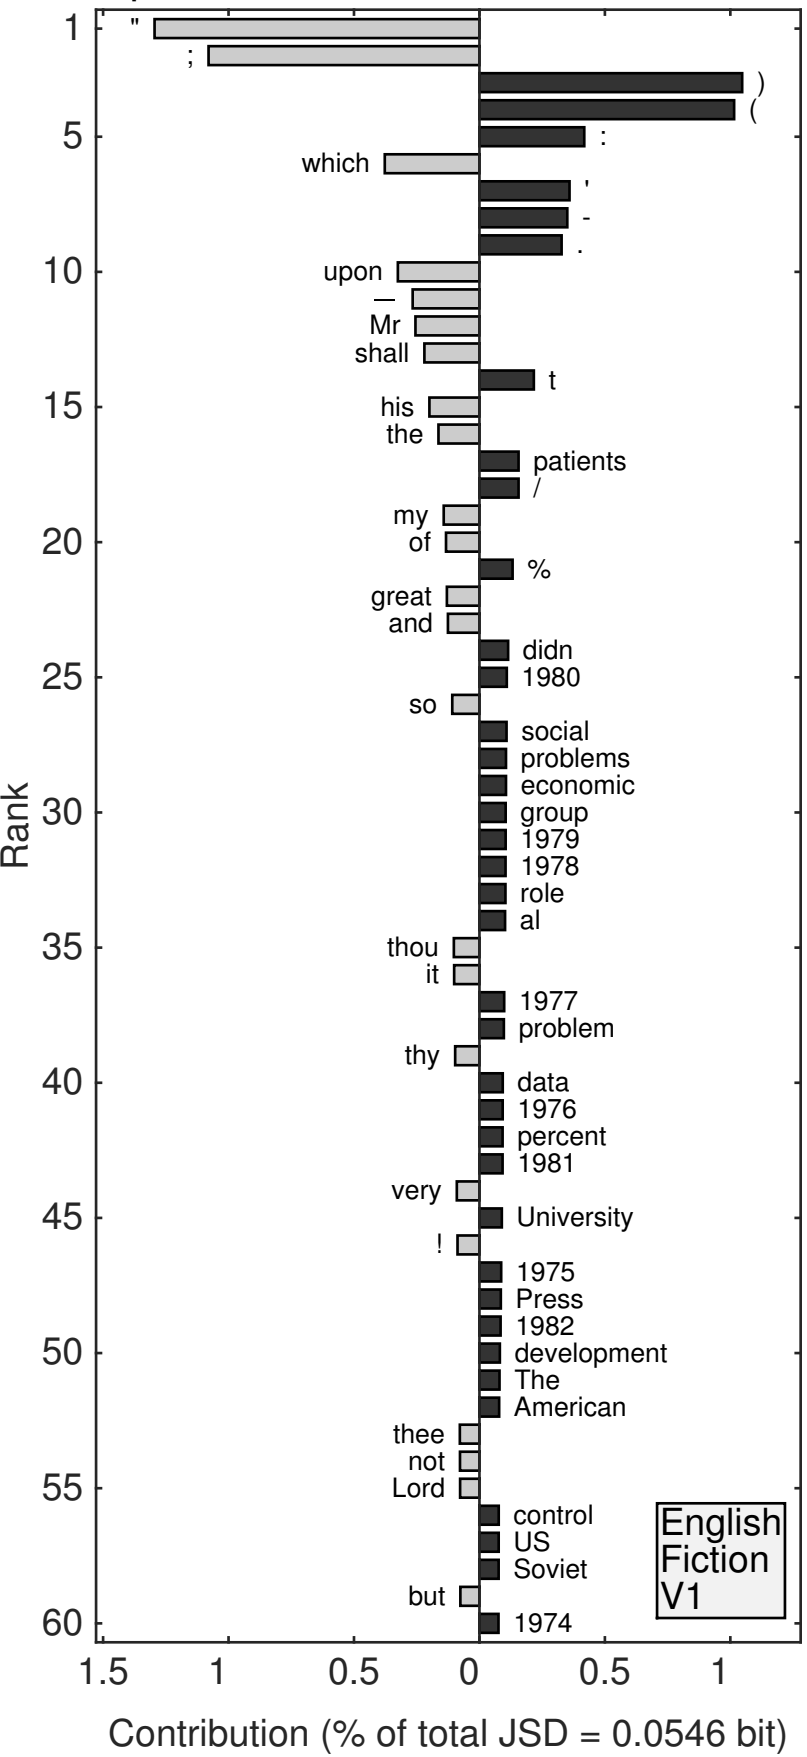

# Top JSD contributions: 1860s to 1990s

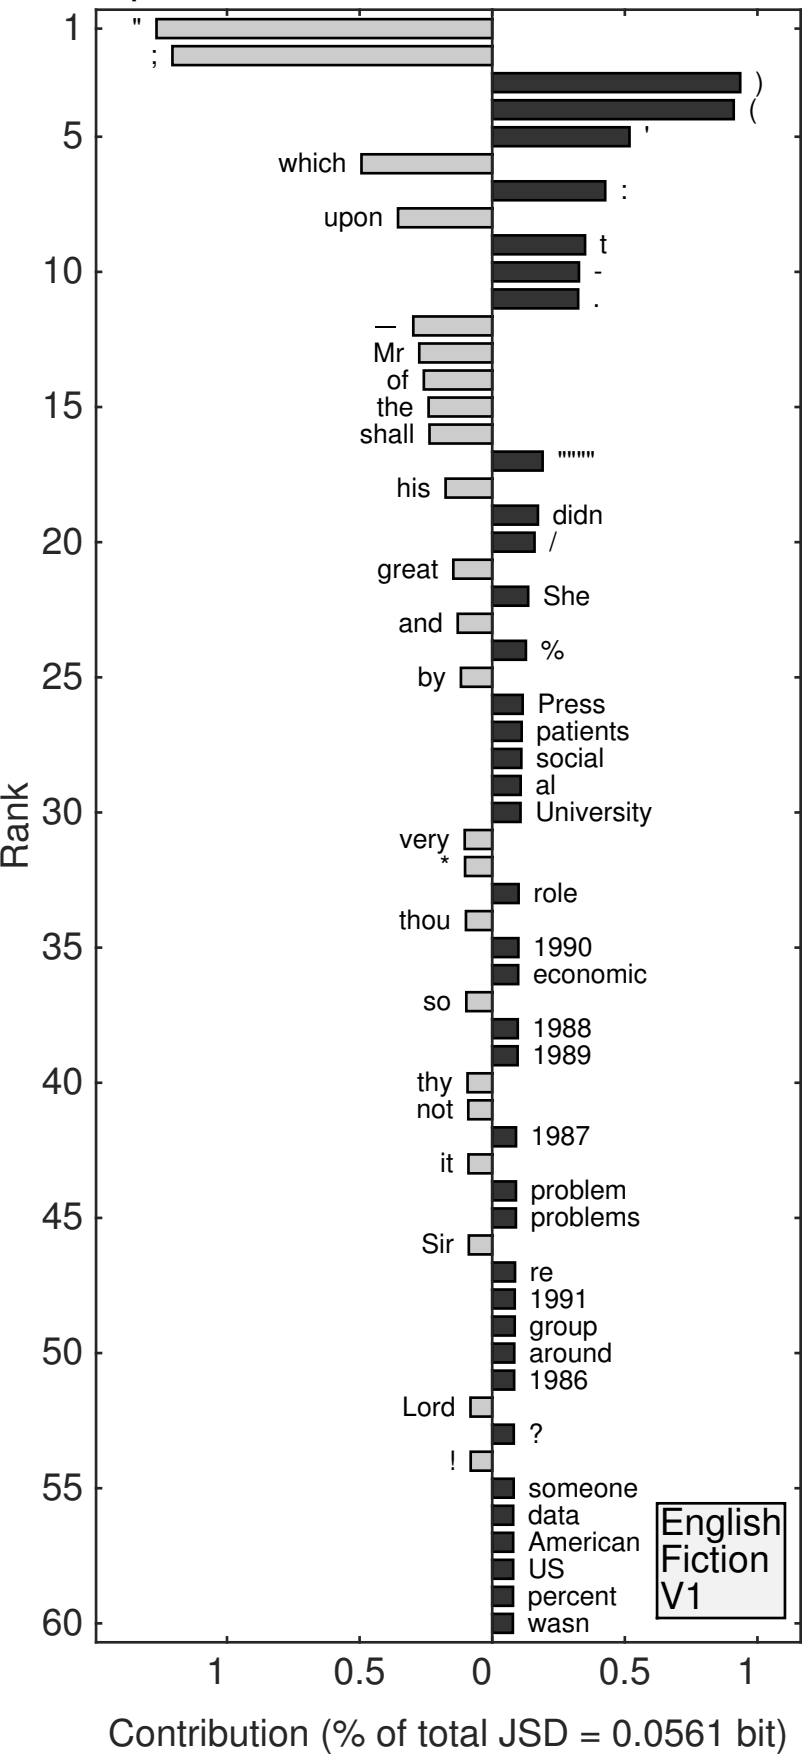



# Top JSD contributions: 1870s to 1880s

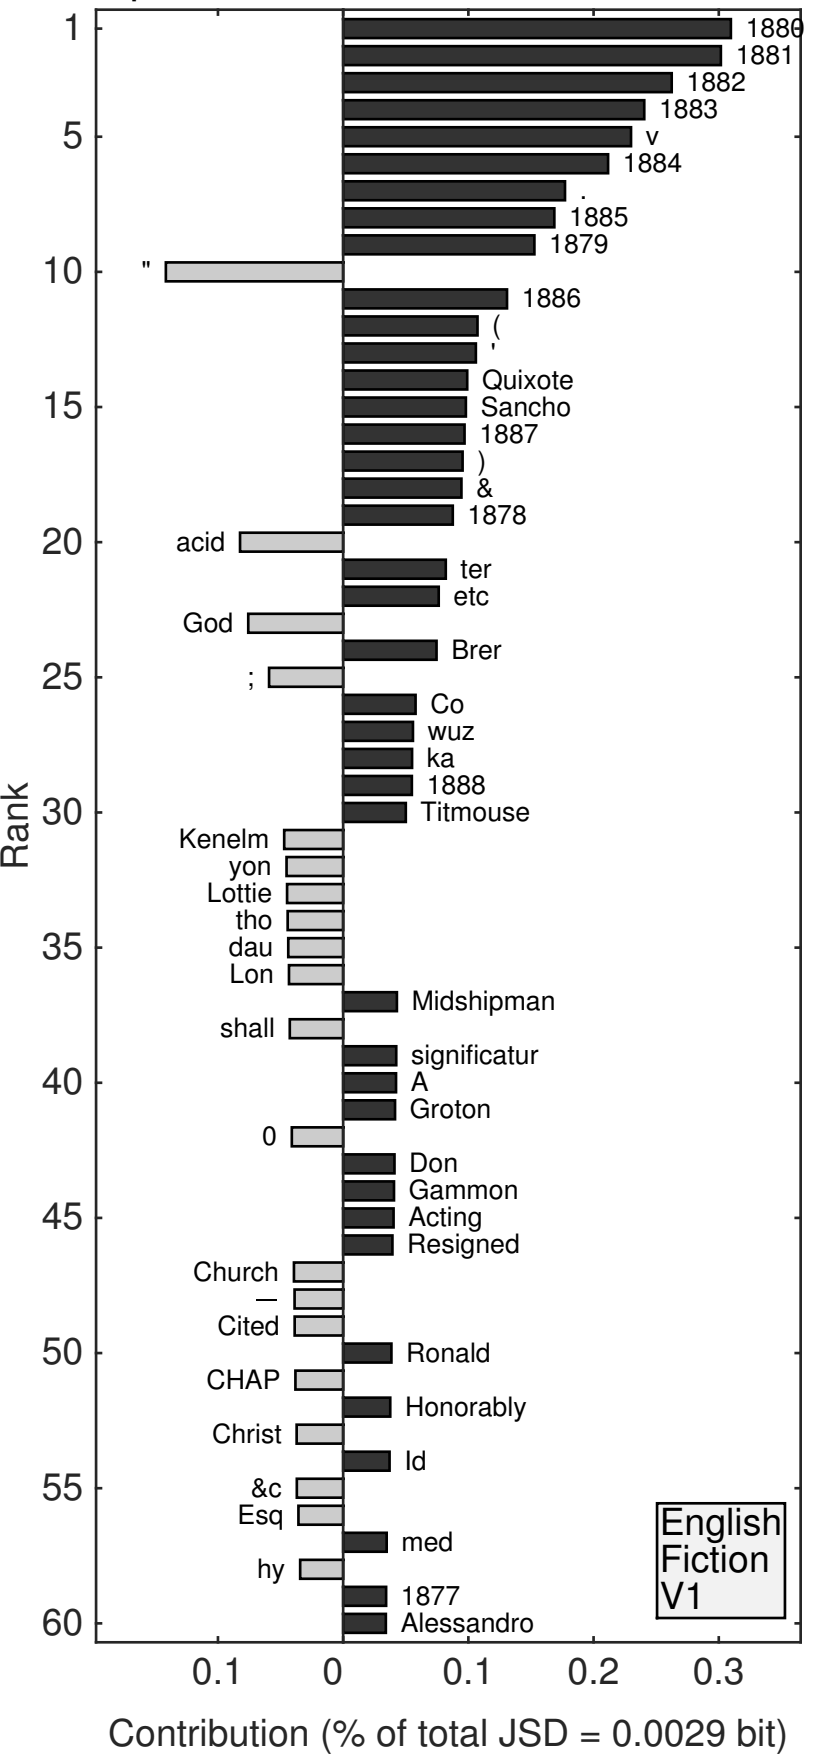

English Fiction V1

# Top JSD contributions: 1870s to 1890s

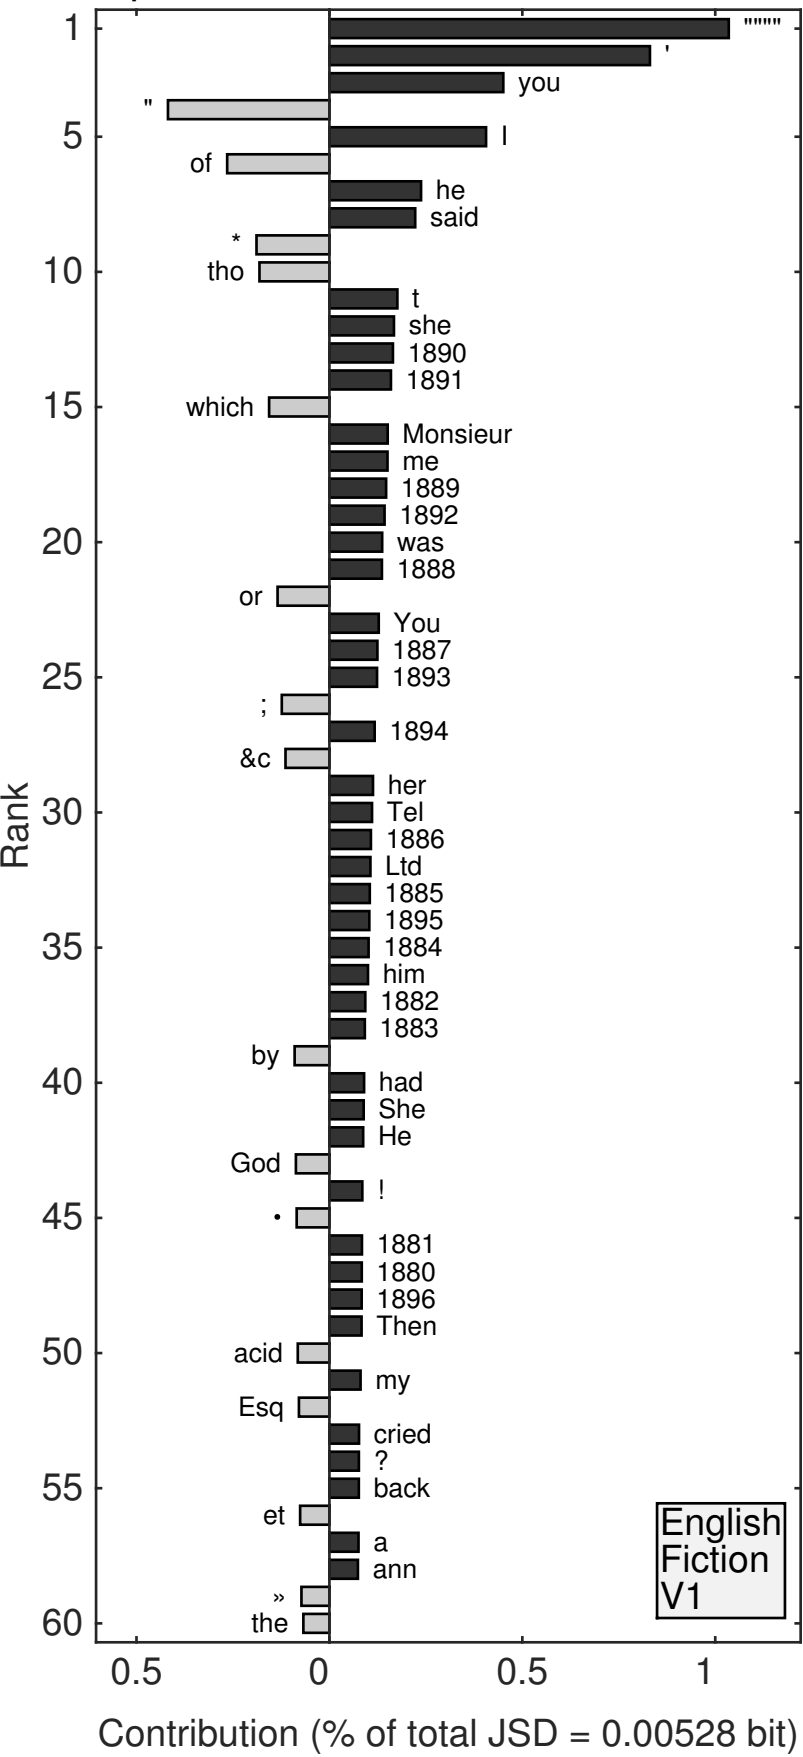

# Top JSD contributions: 1870s to 1900s

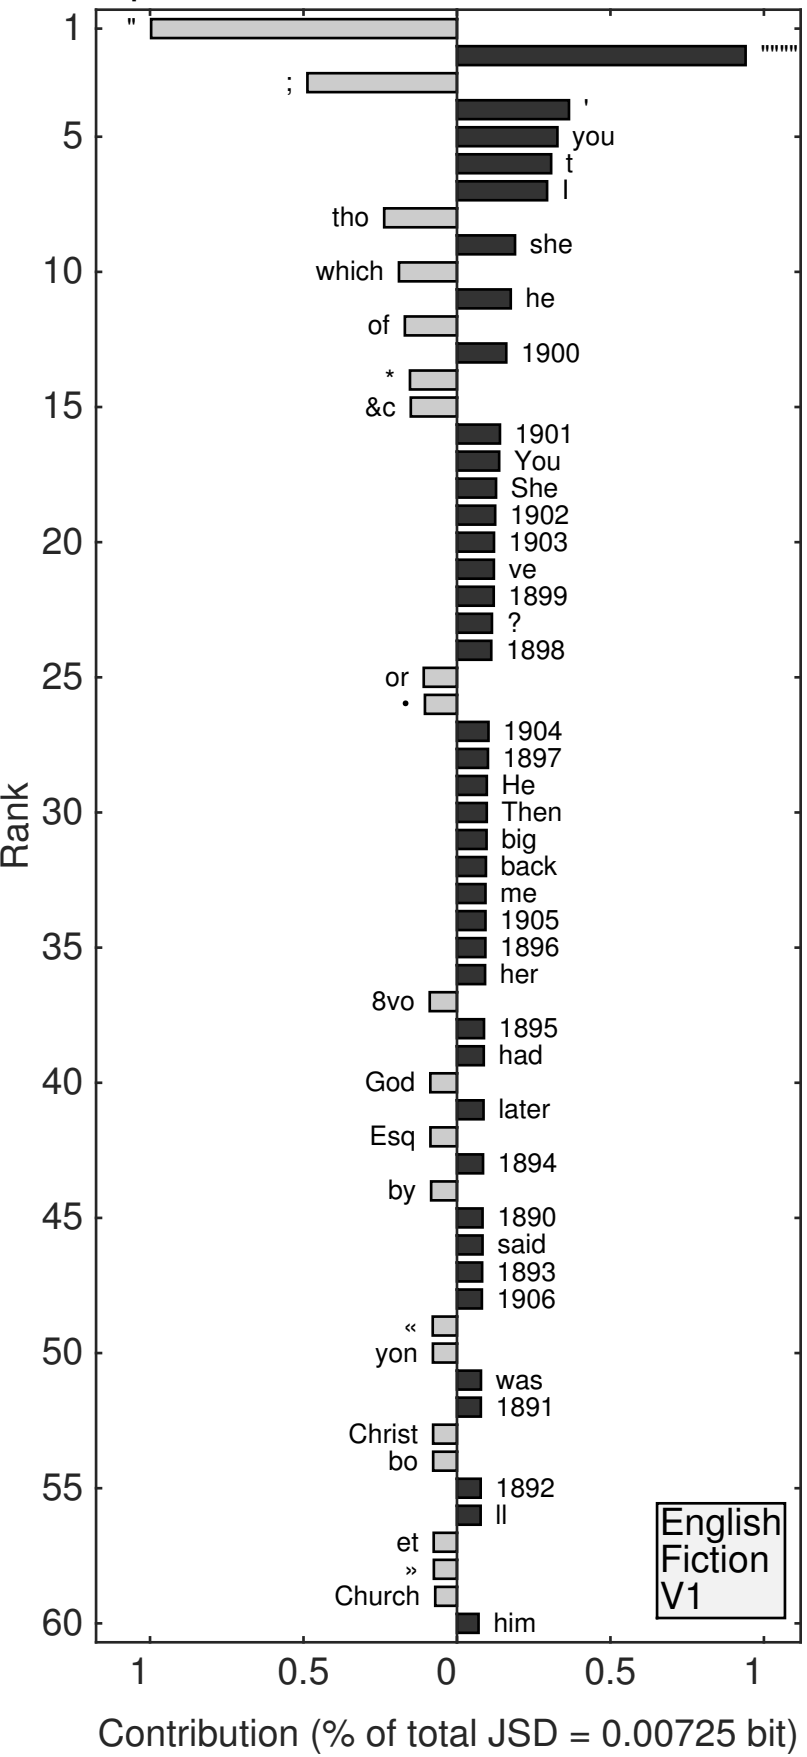

# Top JSD contributions: 1870s to 1910s

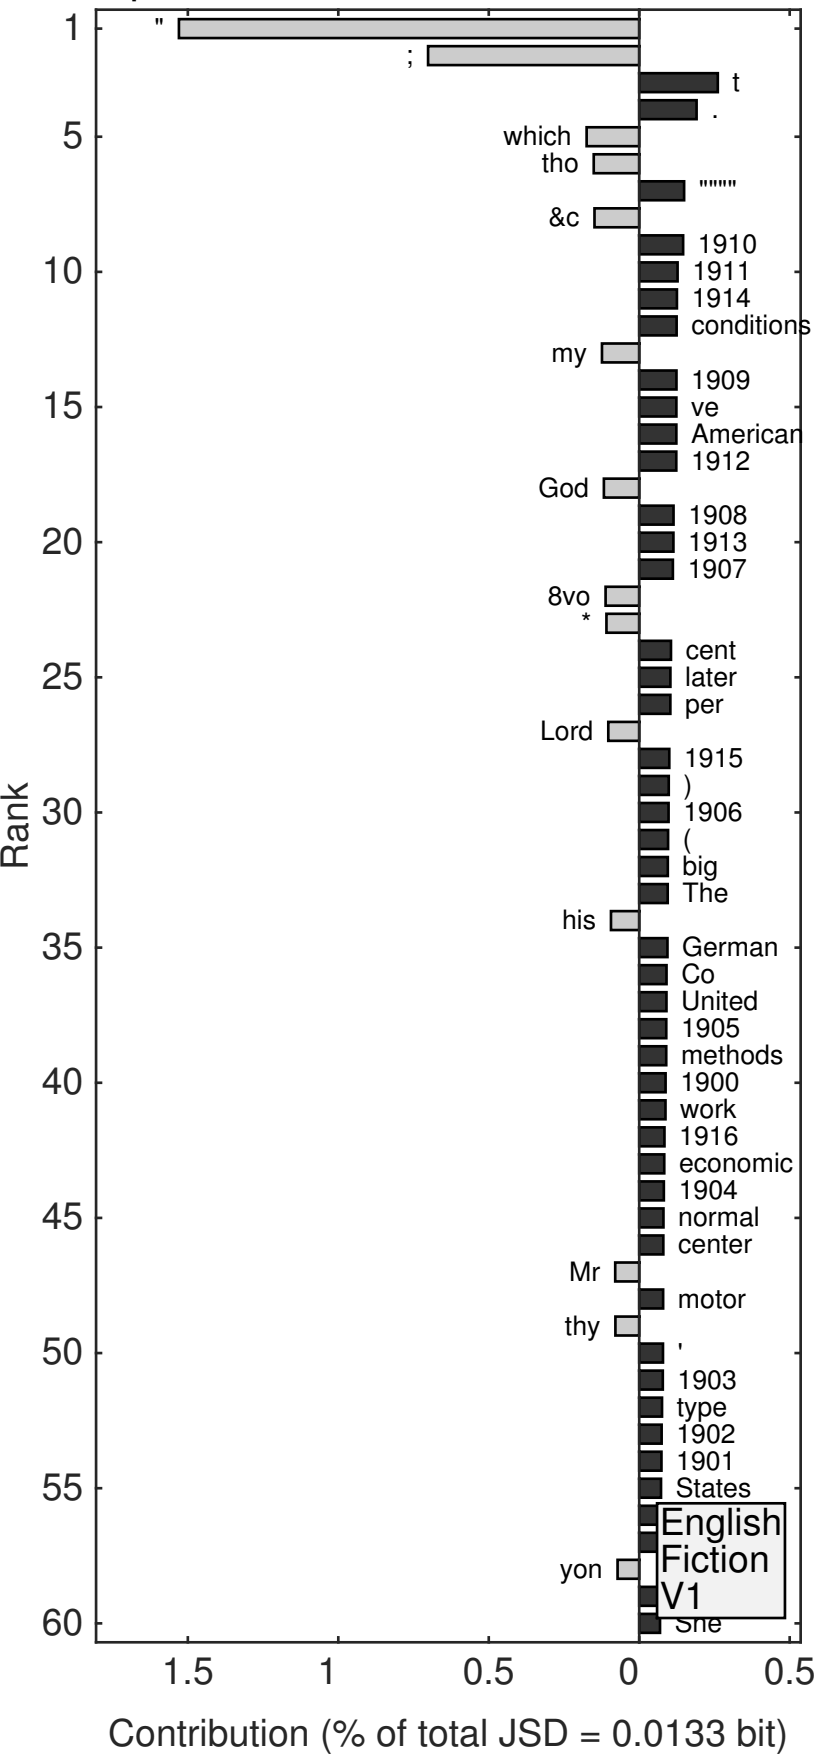

# Top JSD contributions: 1870s to 1920s

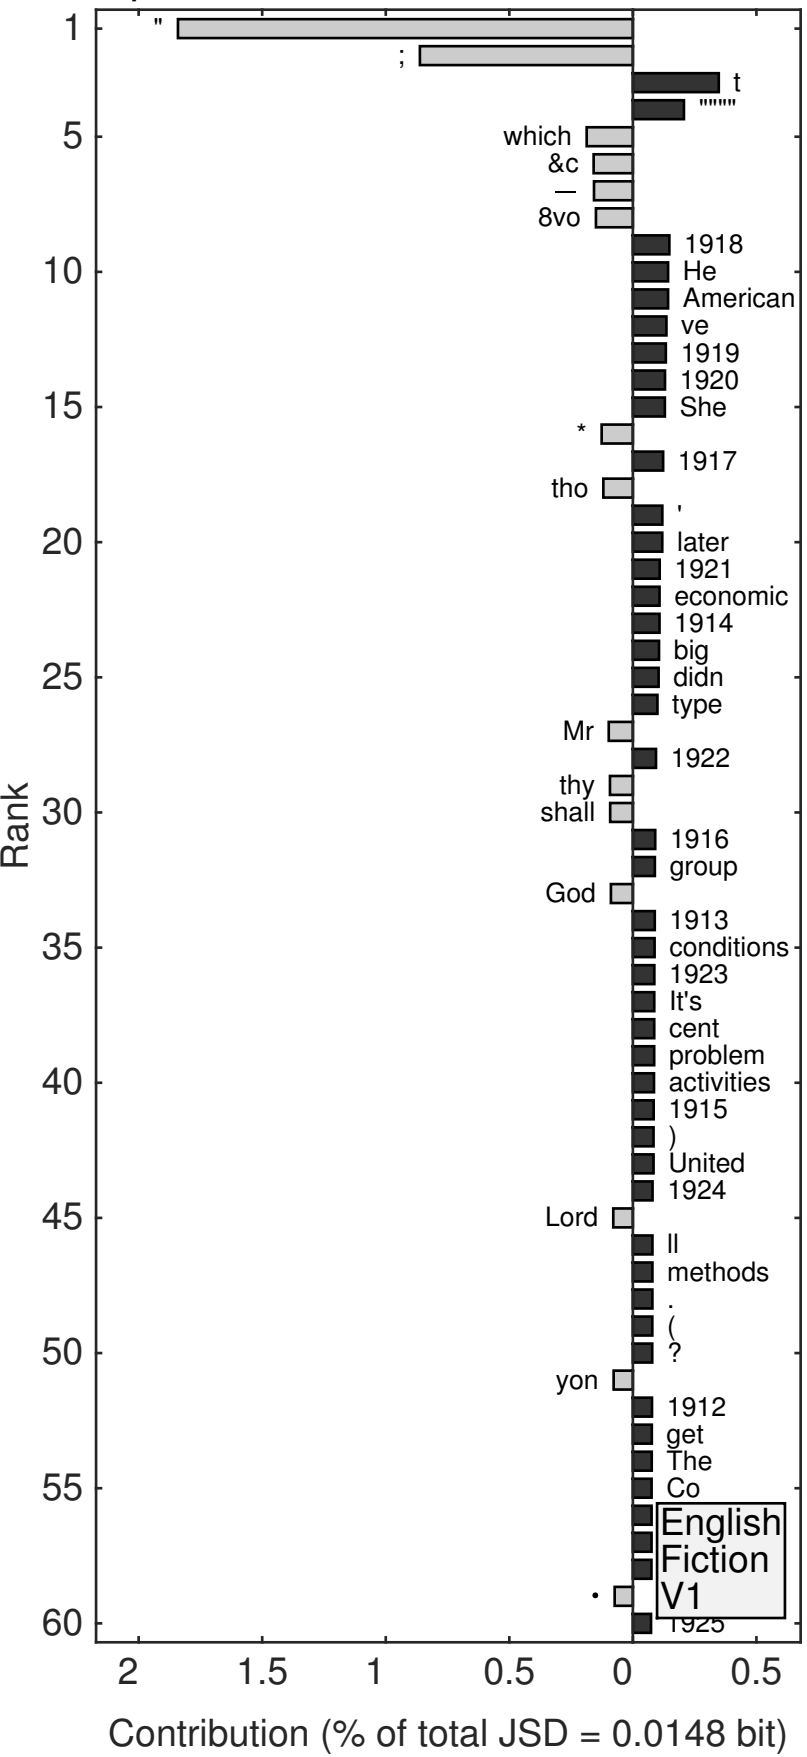

# Top JSD contributions: 1870s to 1930s

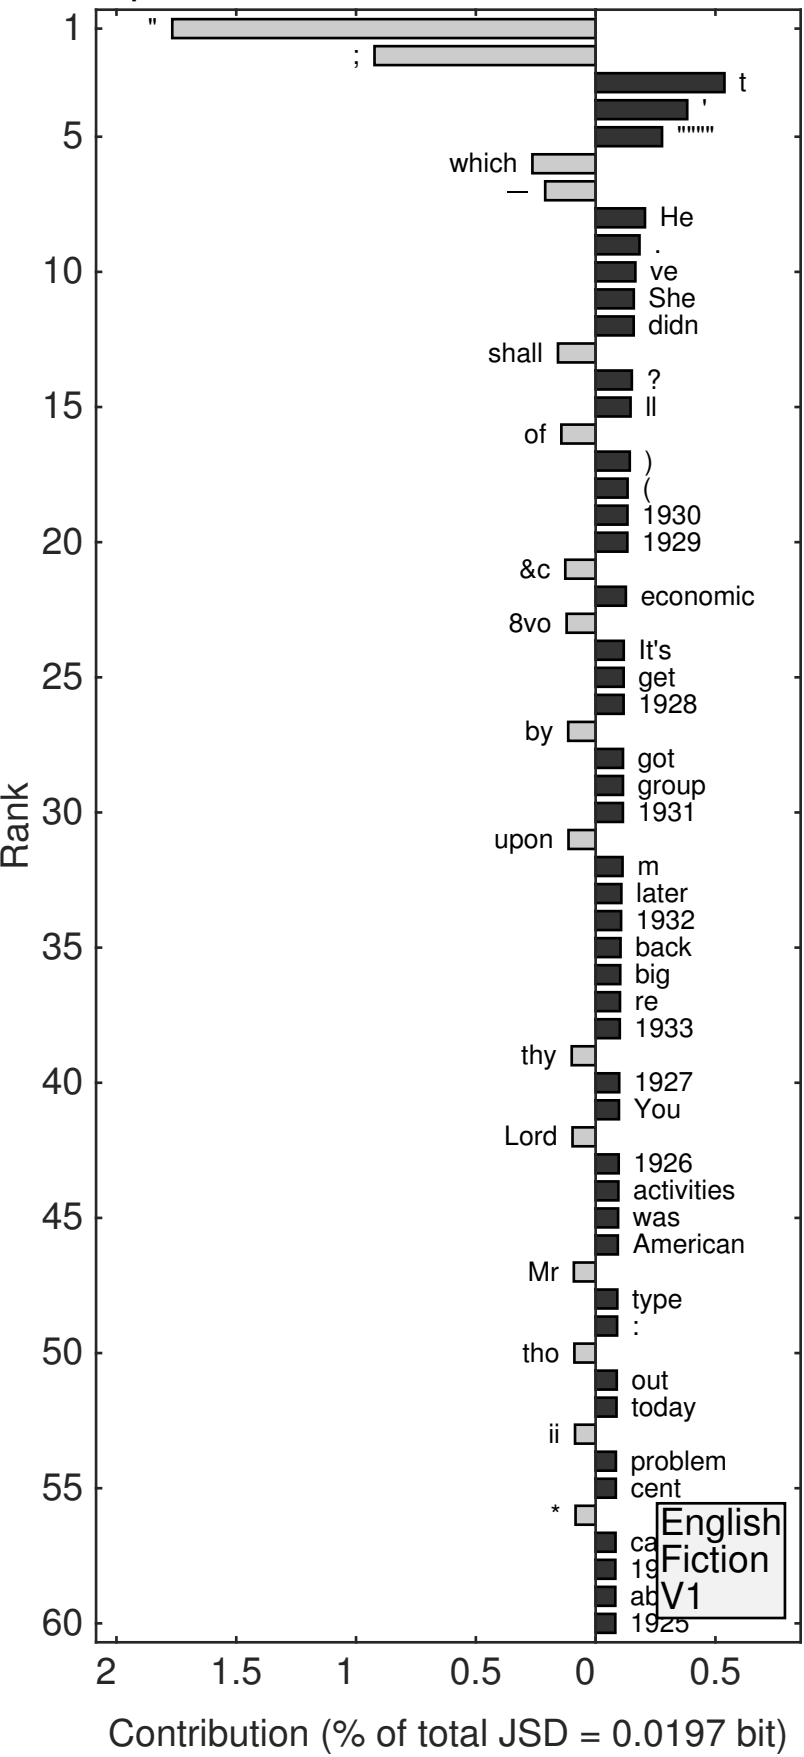

# Top JSD contributions: 1870s to 1940s

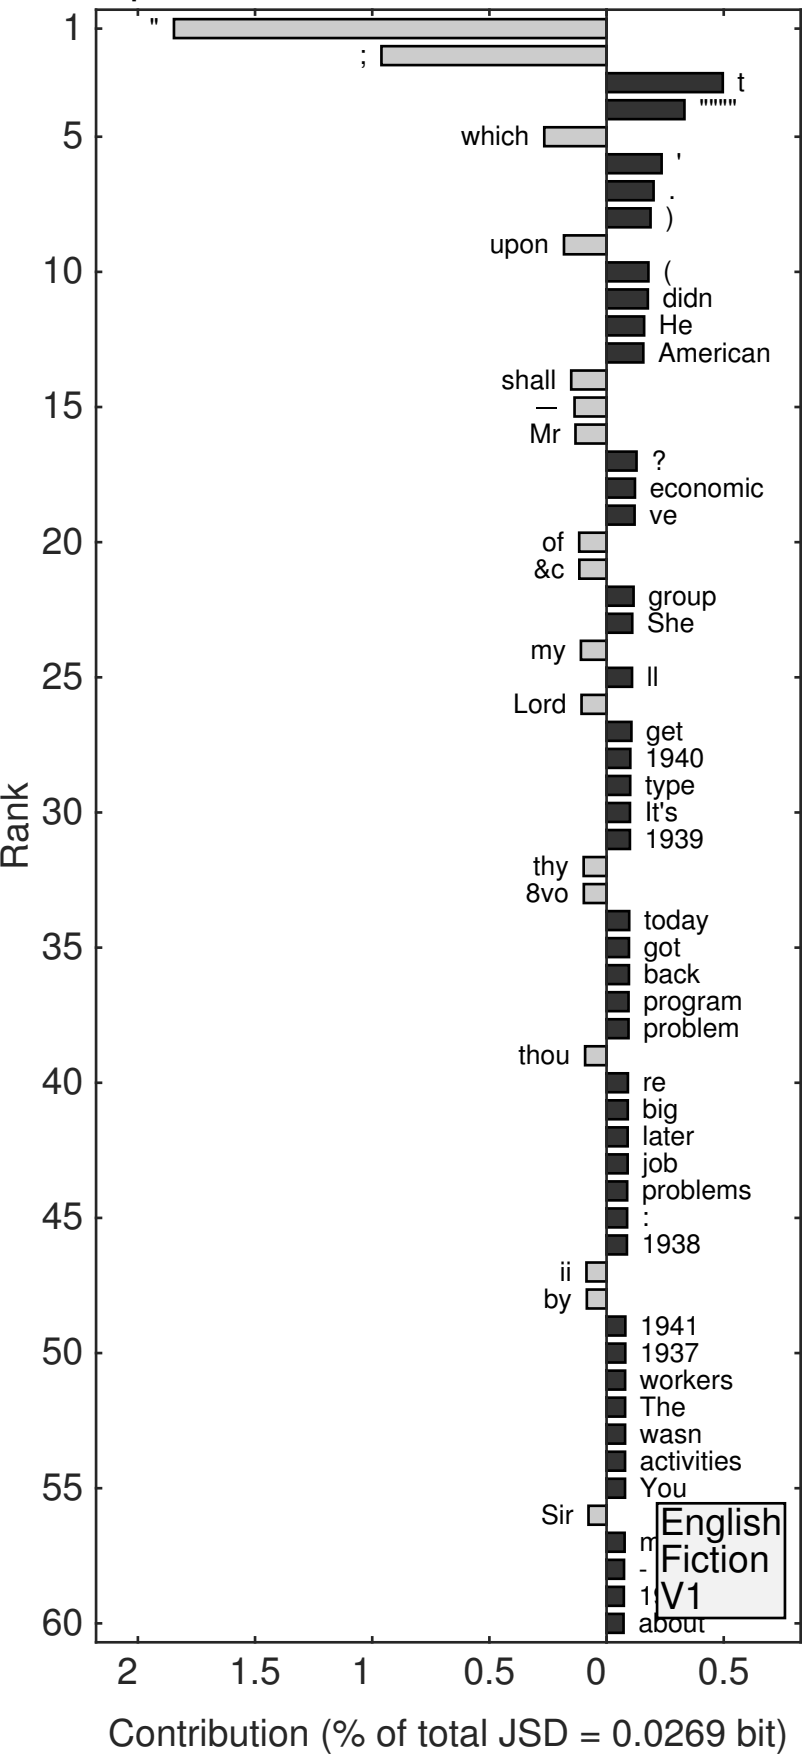

# Top JSD contributions: 1870s to 1950s

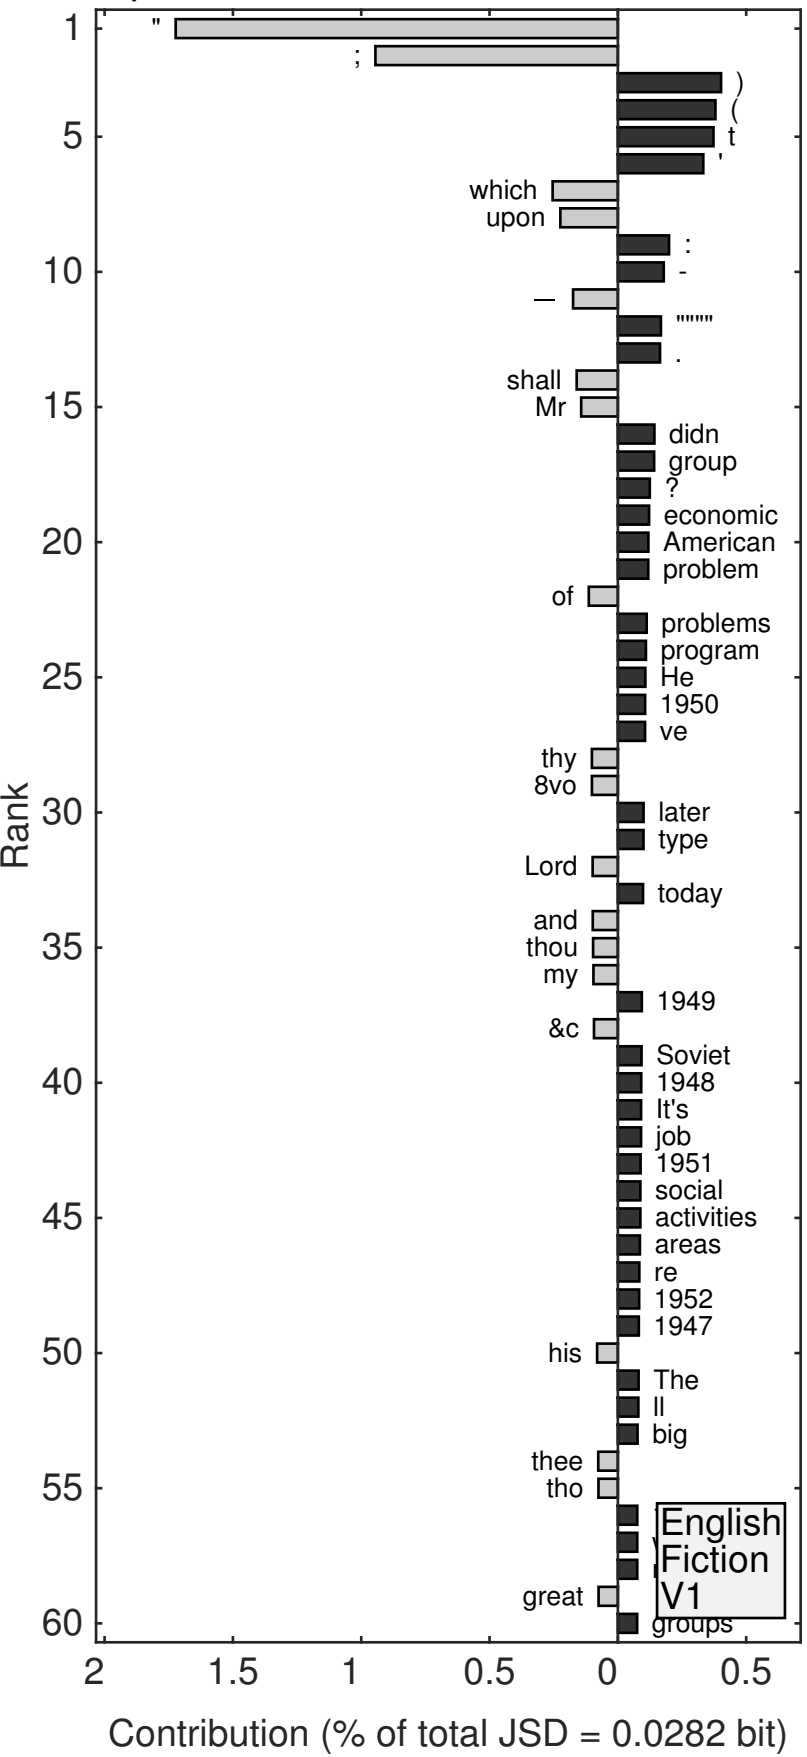



# Top JSD contributions: 1870s to 1960s

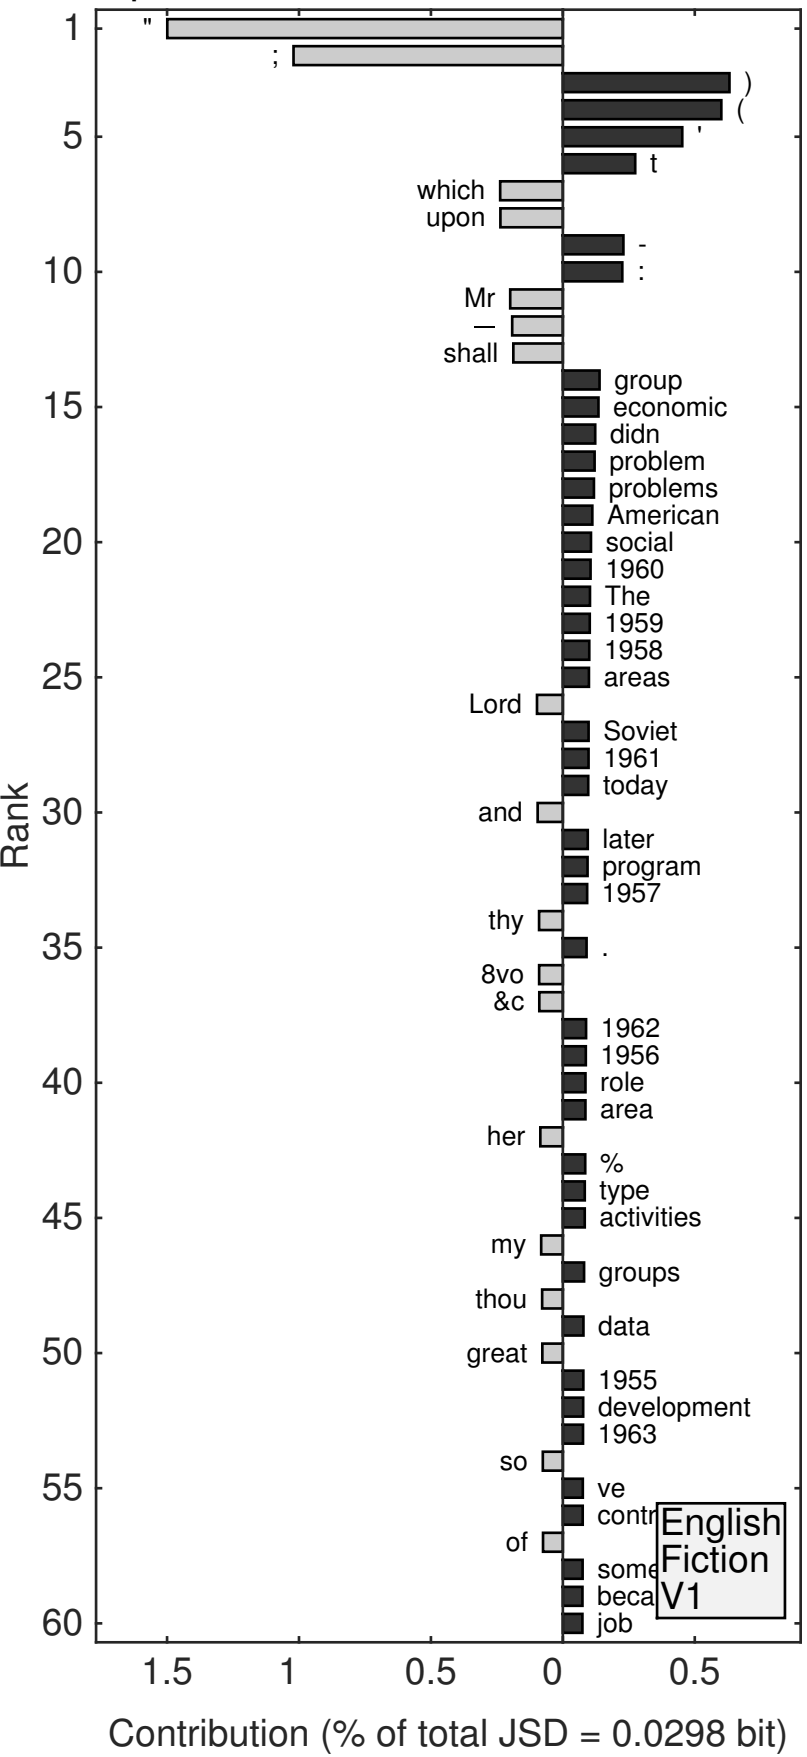

English Fiction V1

# Top JSD contributions: 1870s to 1970s

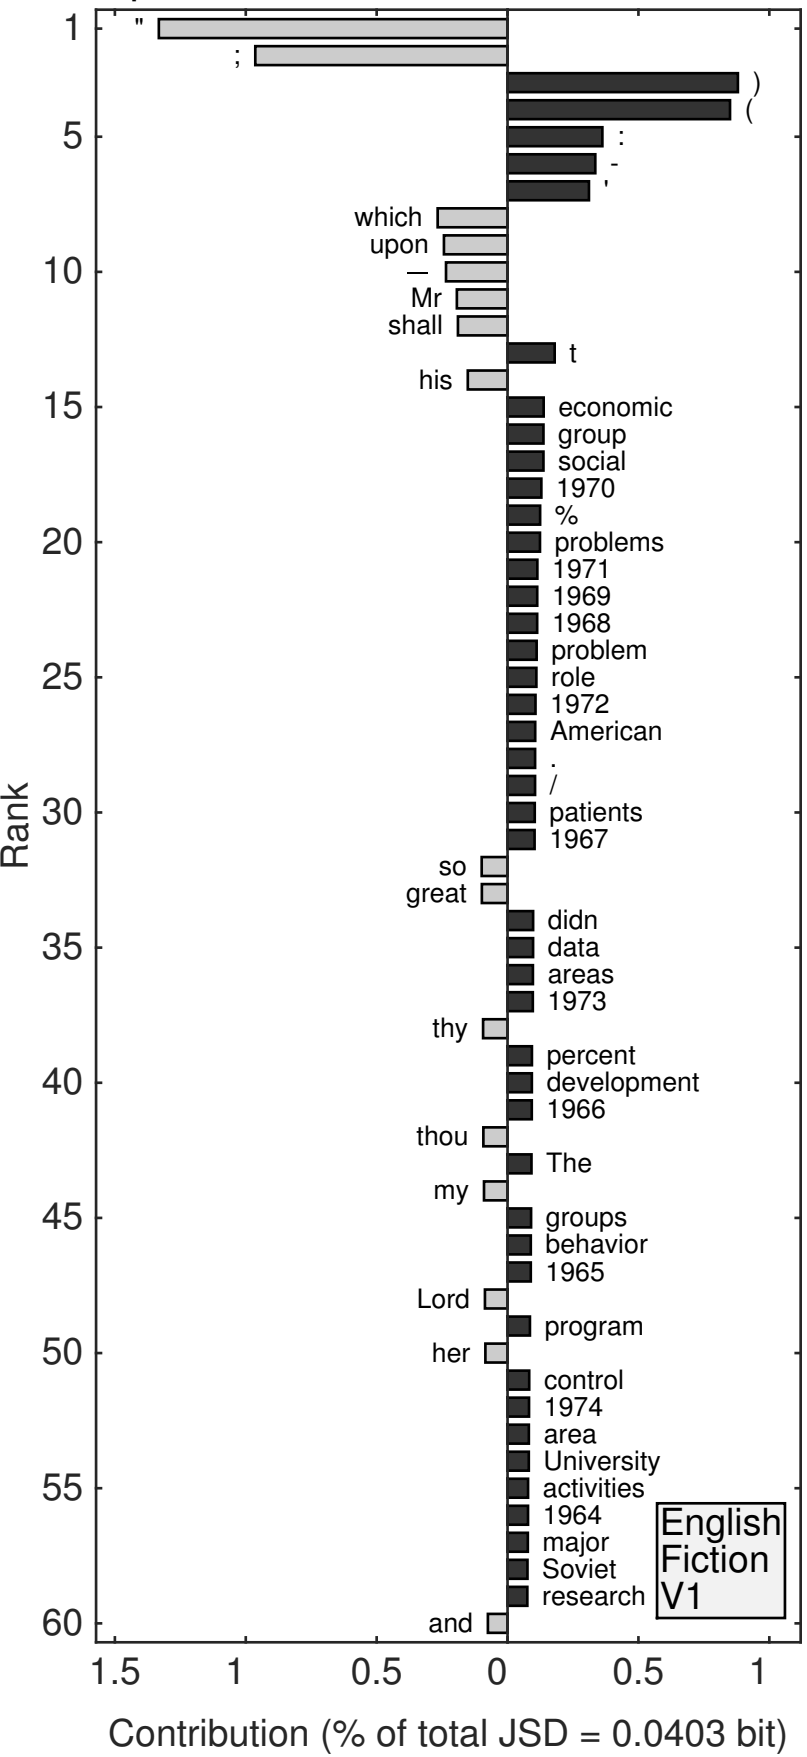

# Top JSD contributions: 1870s to 1980s

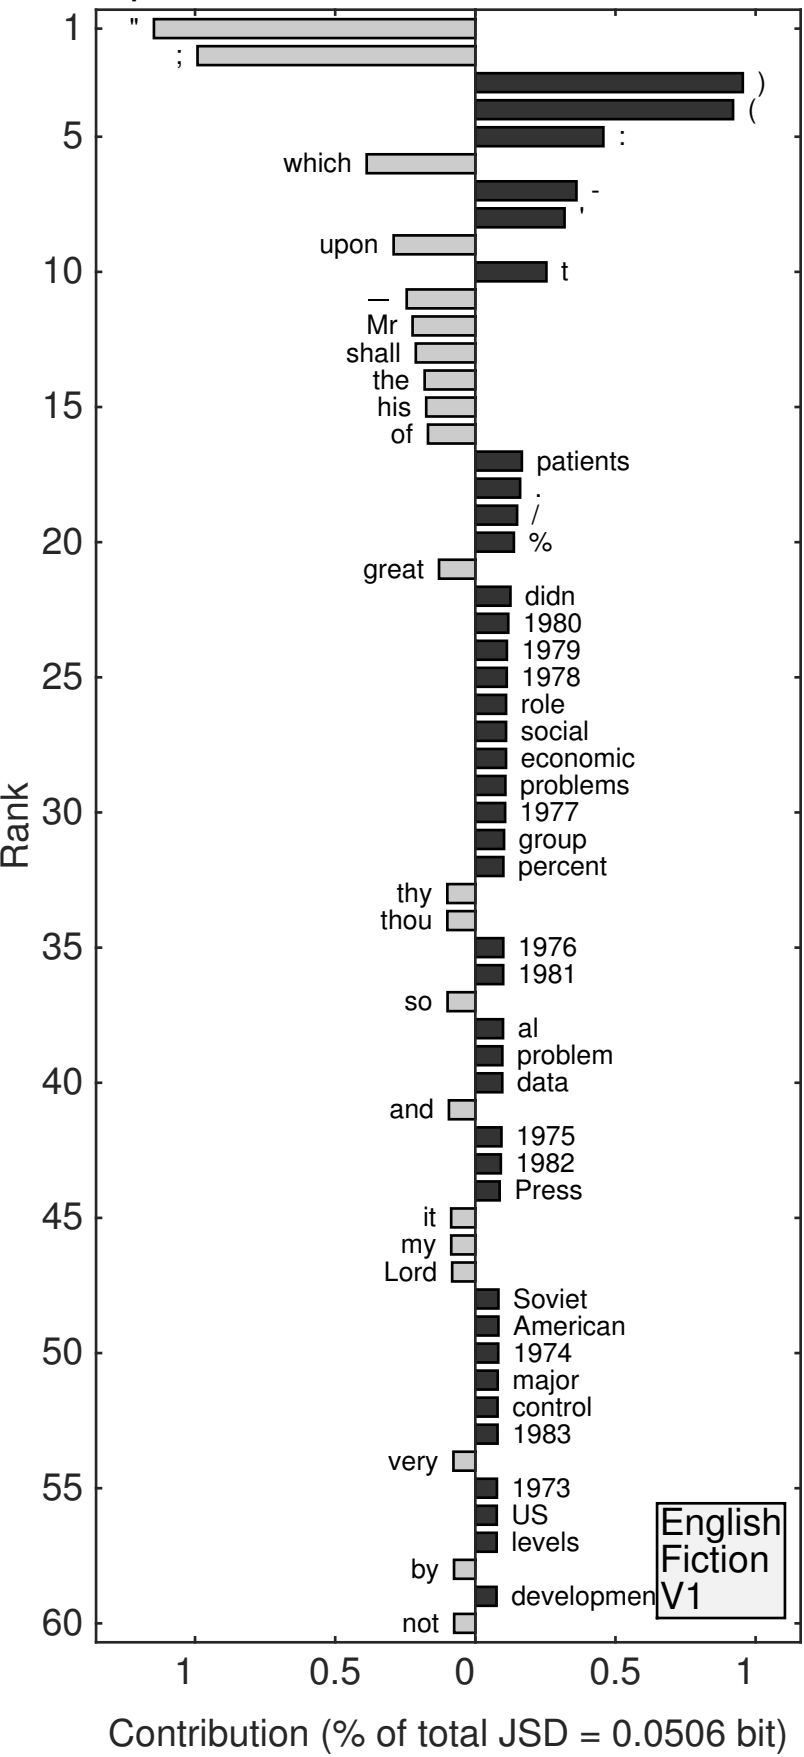

English Fiction V1

# Top JSD contributions: 1870s to 1990s

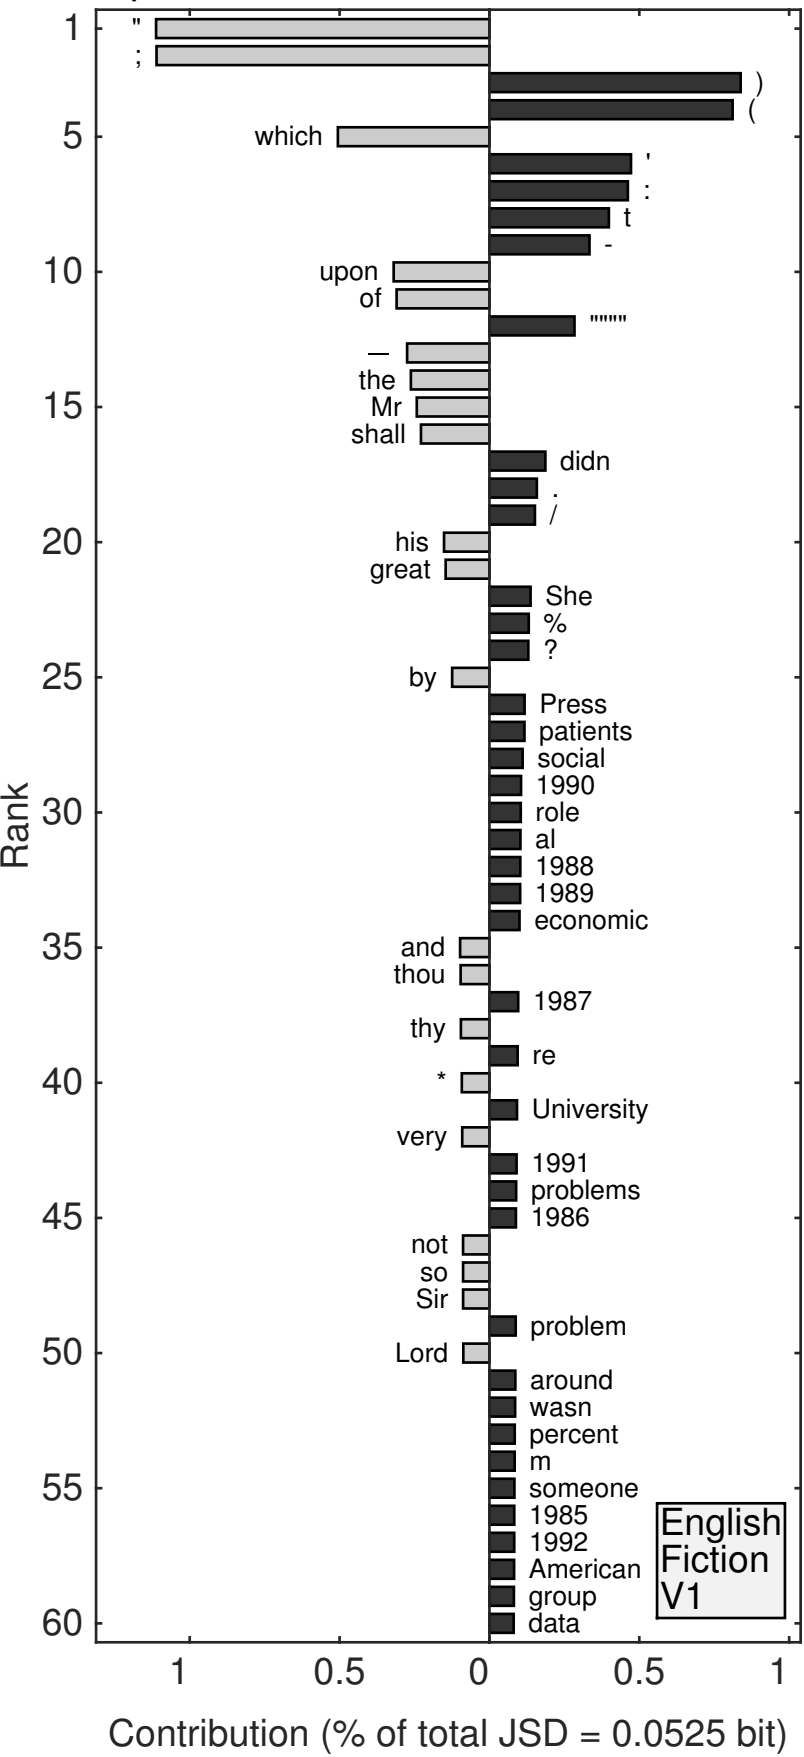

# Top JSD contributions: 1880s to 1890s

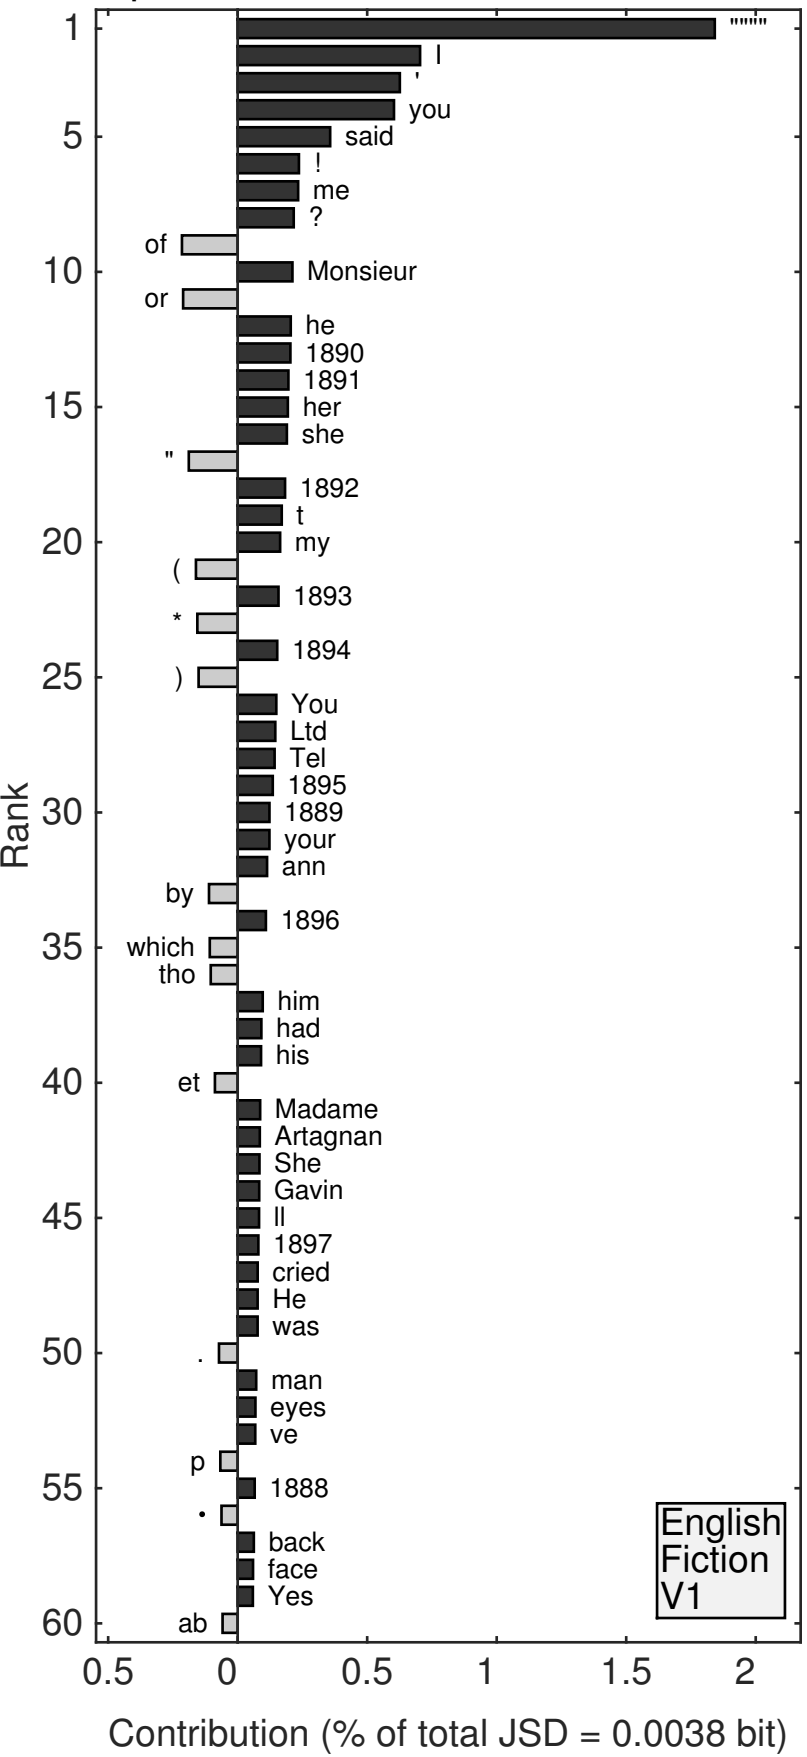

# Top JSD contributions: 1880s to 1900s

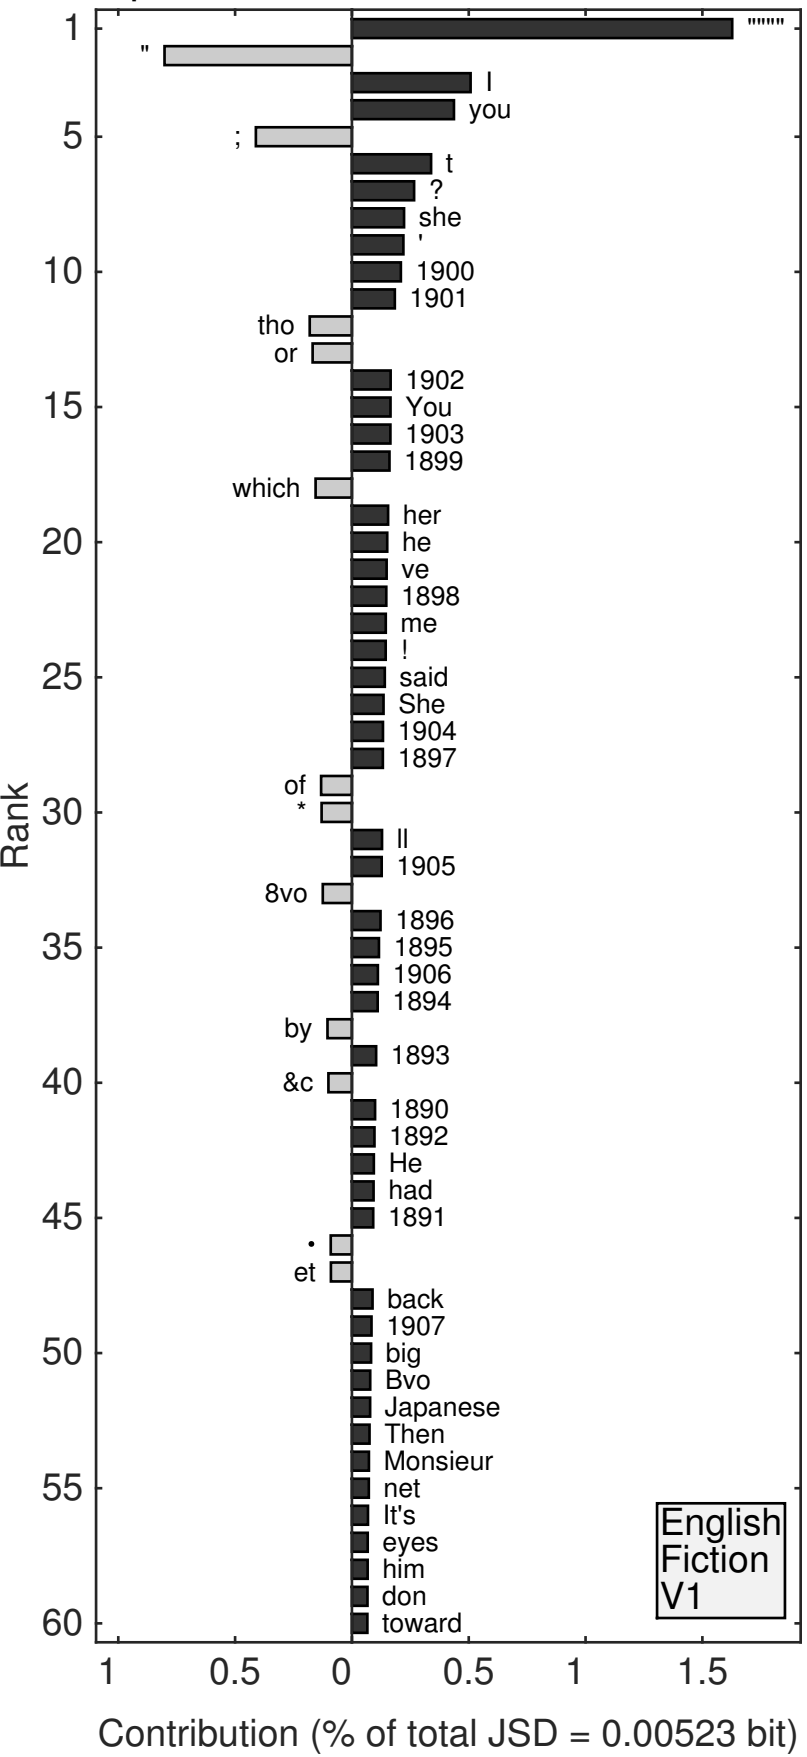

# Top JSD contributions: 1880s to 1910s

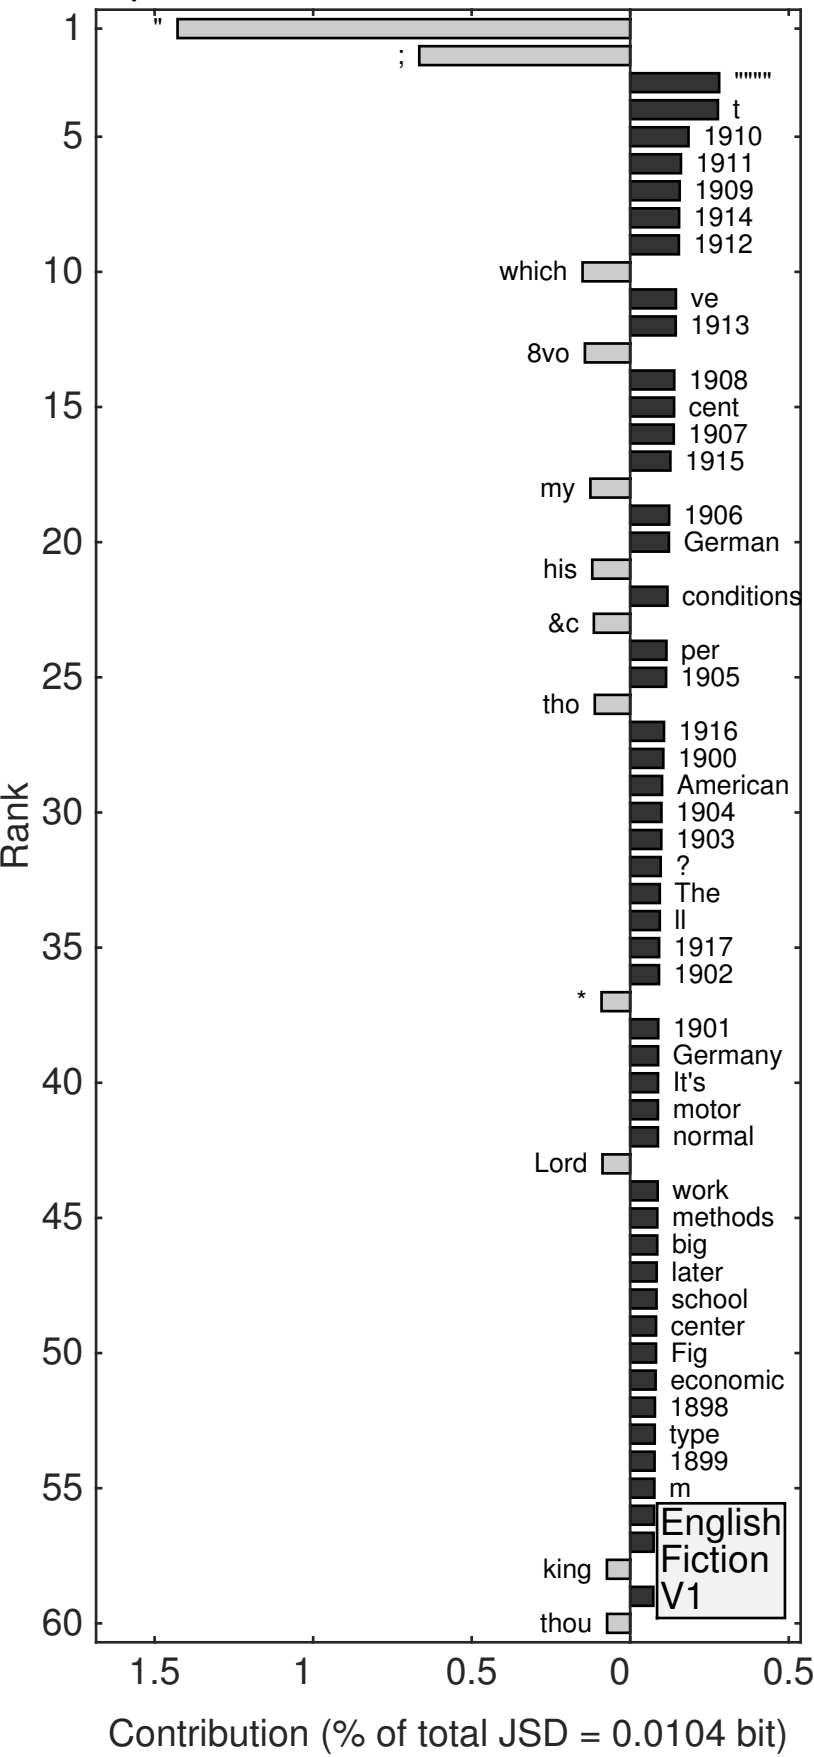

# Top JSD contributions: 1880s to 1920s

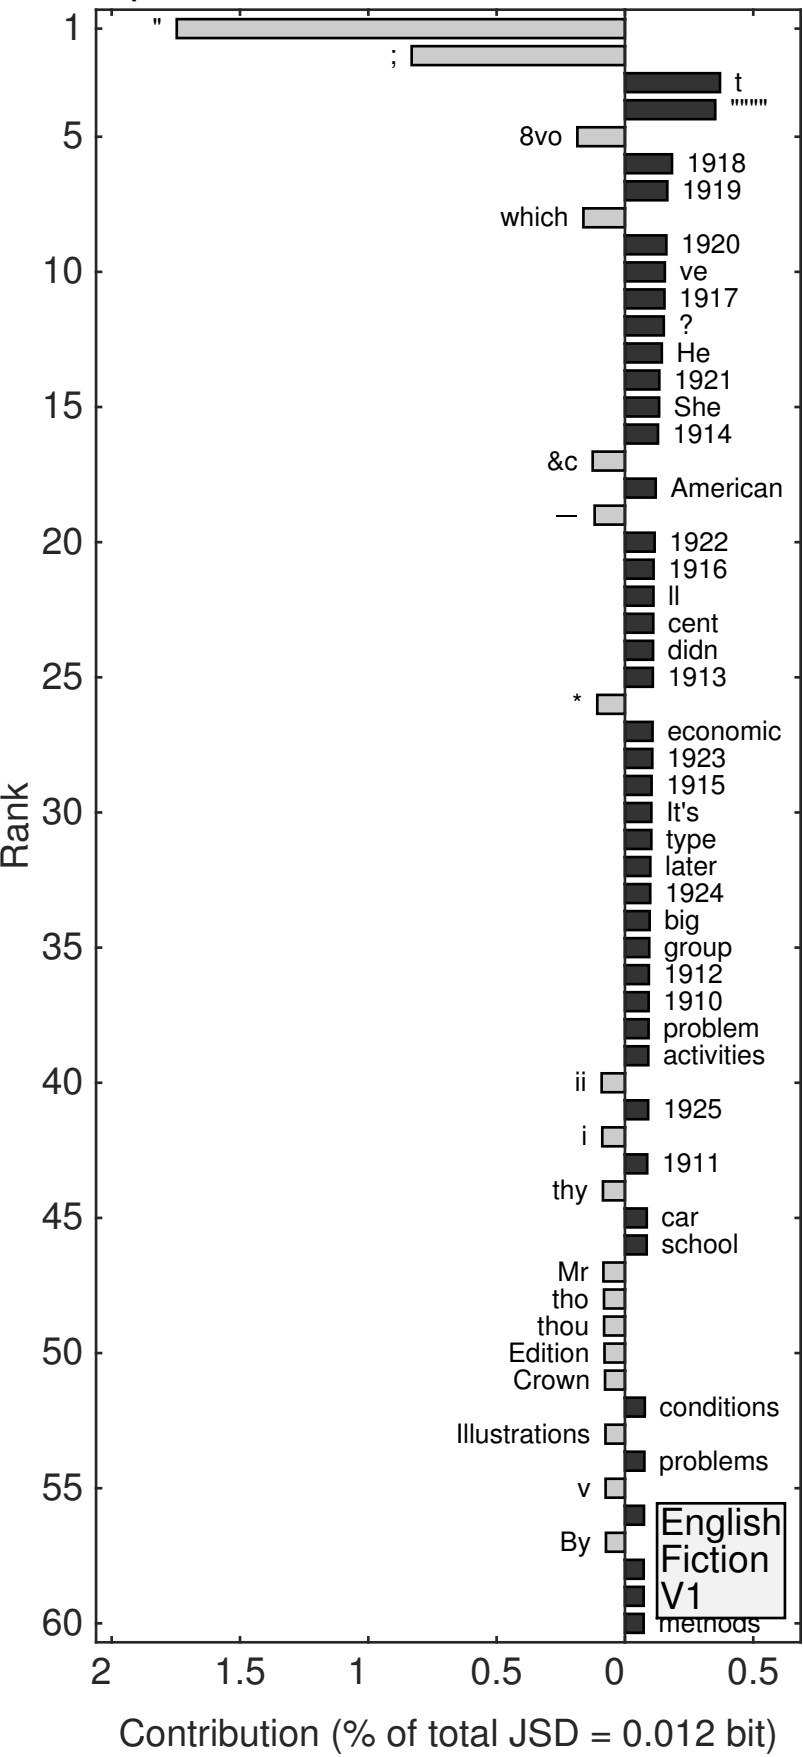



# Top JSD contributions: 1880s to 1930s

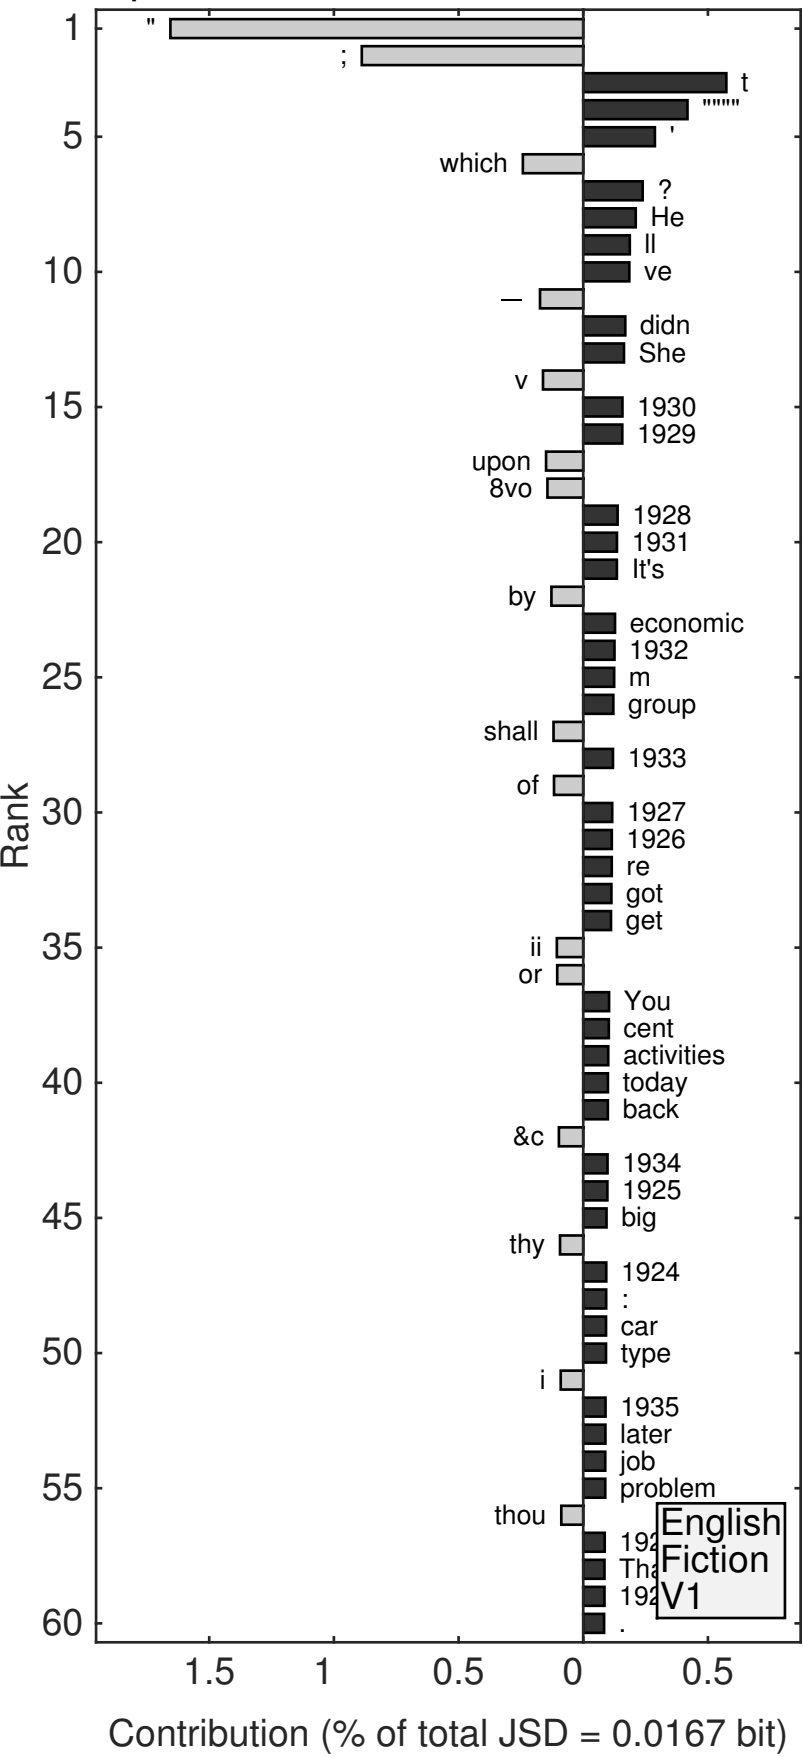

# Top JSD contributions: 1880s to 1940s

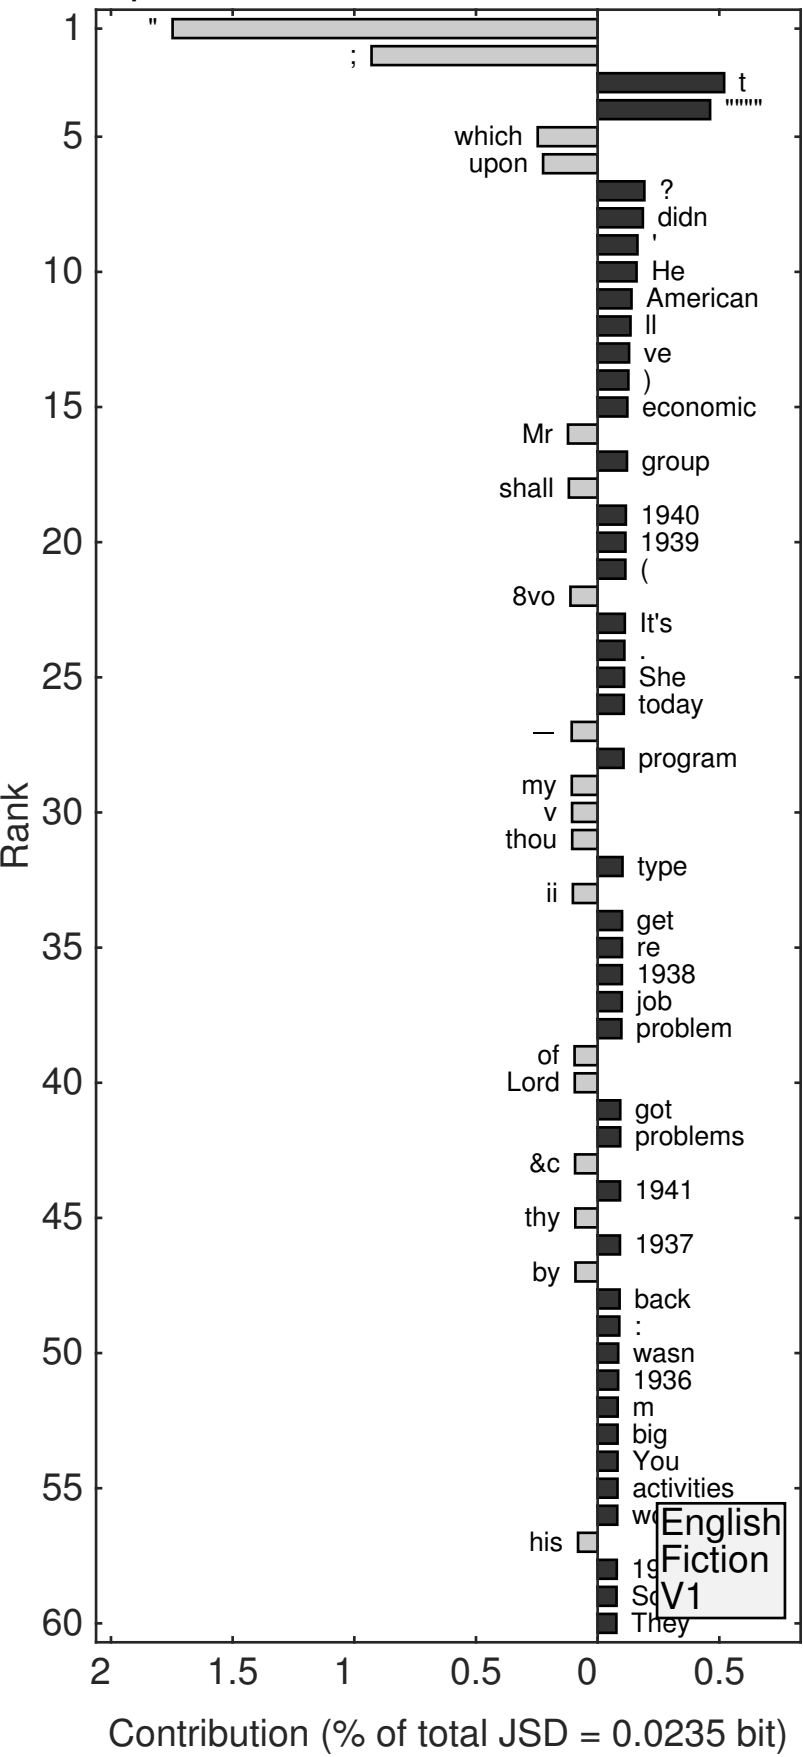

# Top JSD contributions: 1880s to 1950s

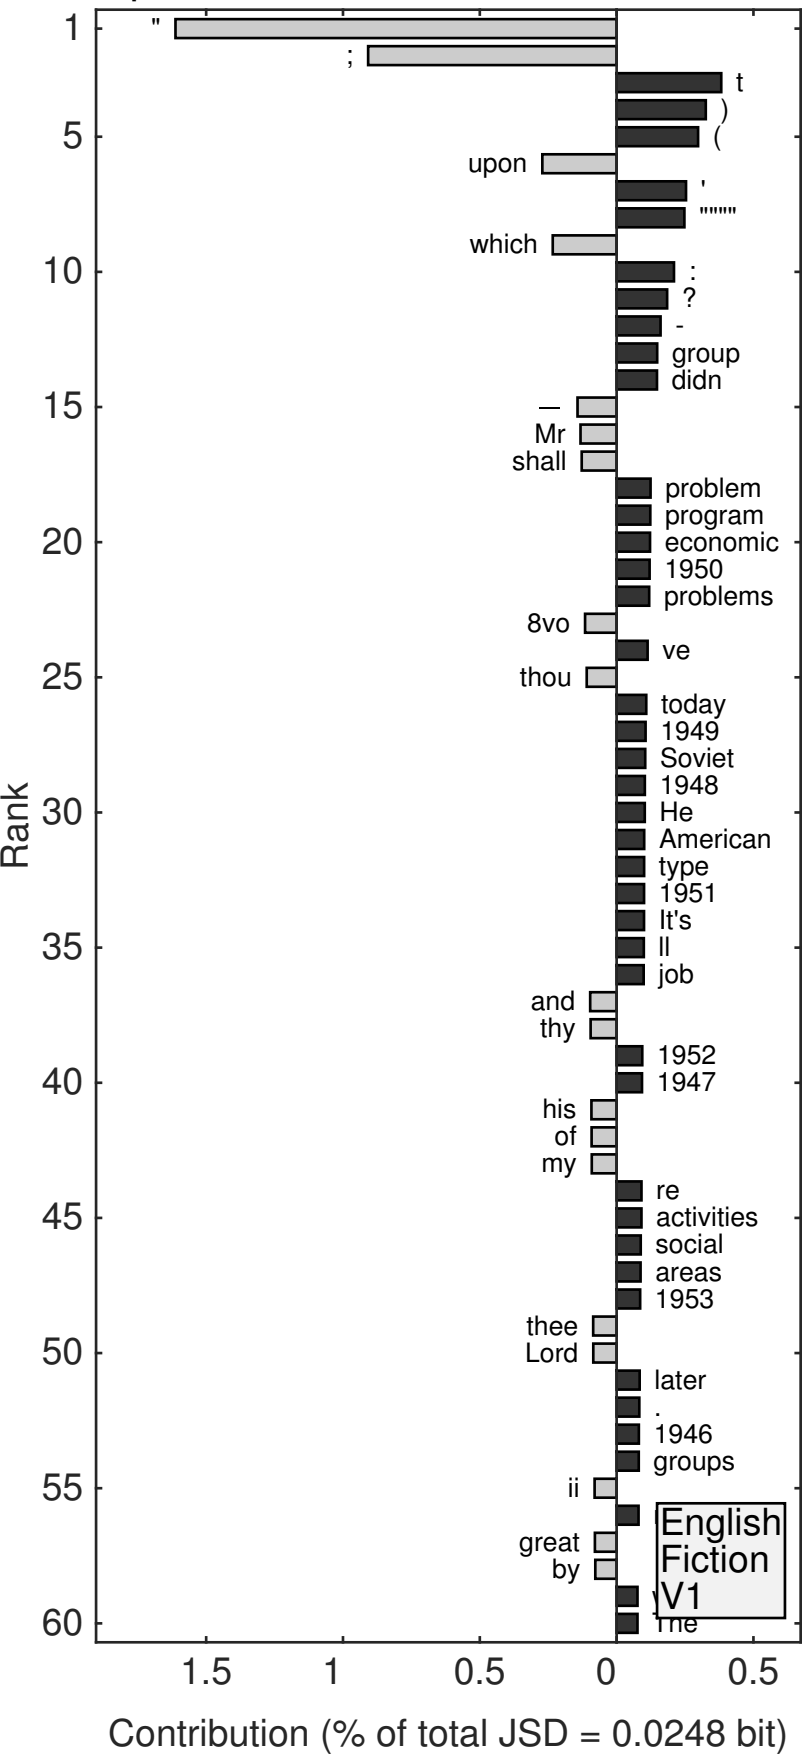

# Top JSD contributions: 1880s to 1960s

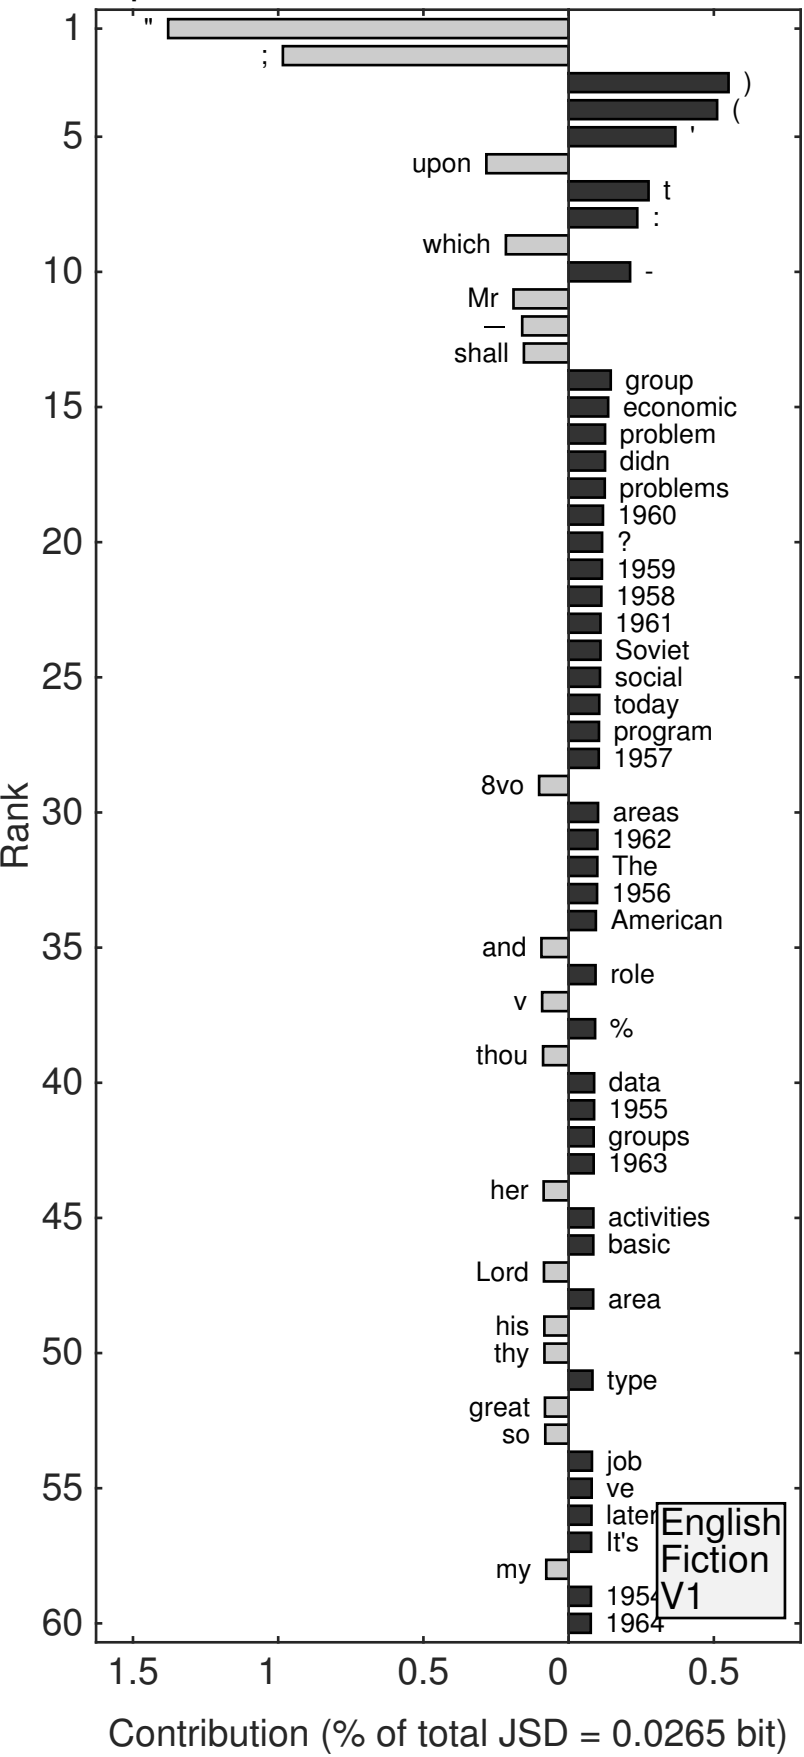

# Top JSD contributions: 1880s to 1970s

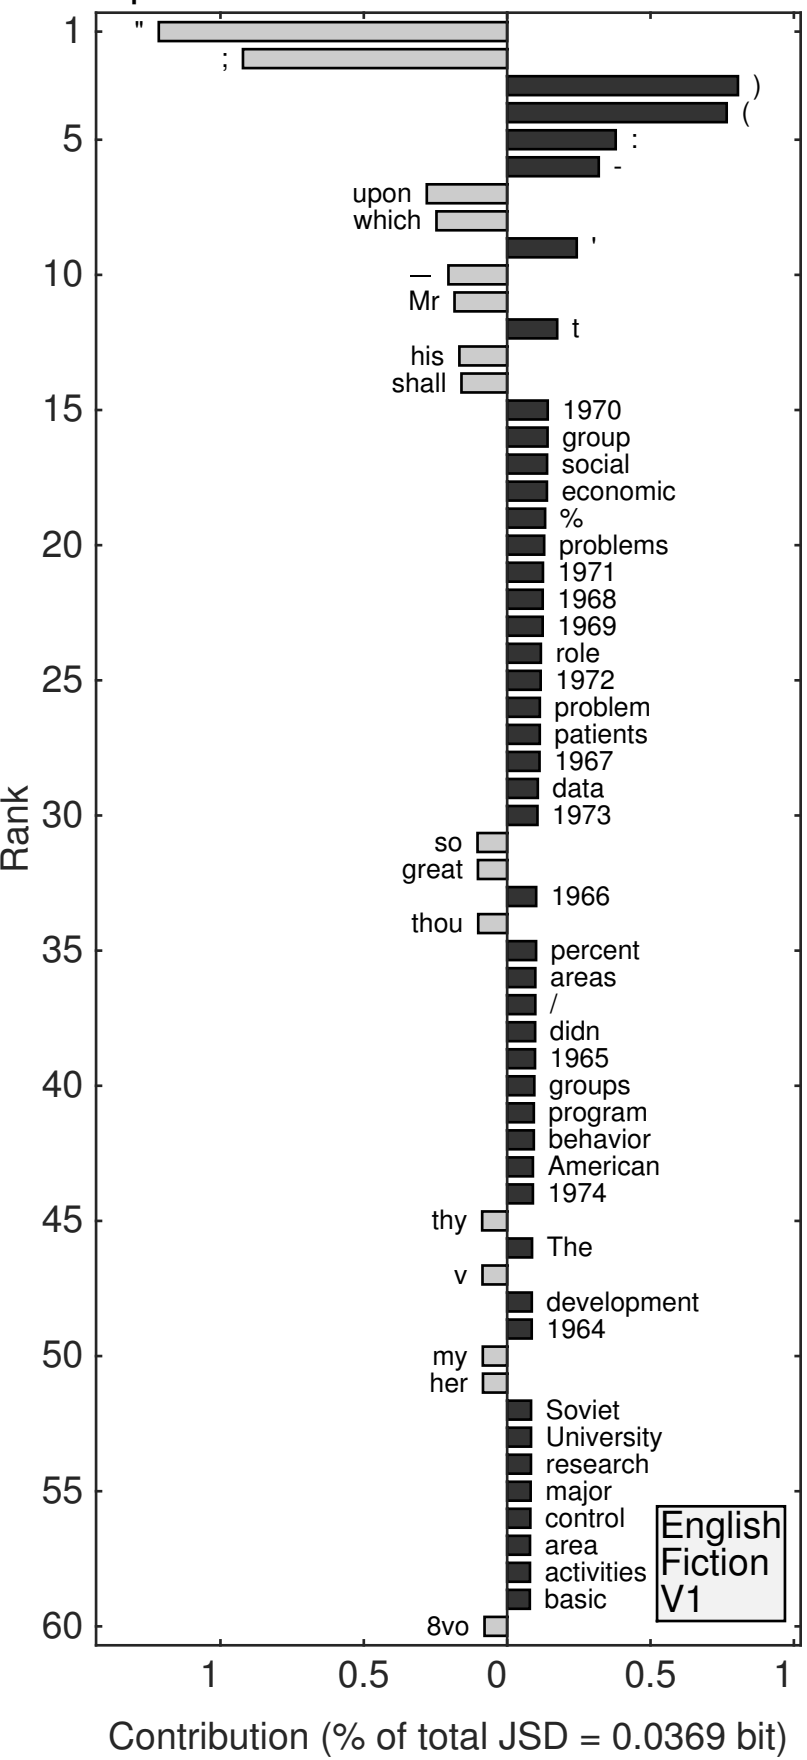

# Top JSD contributions: 1880s to 1980s

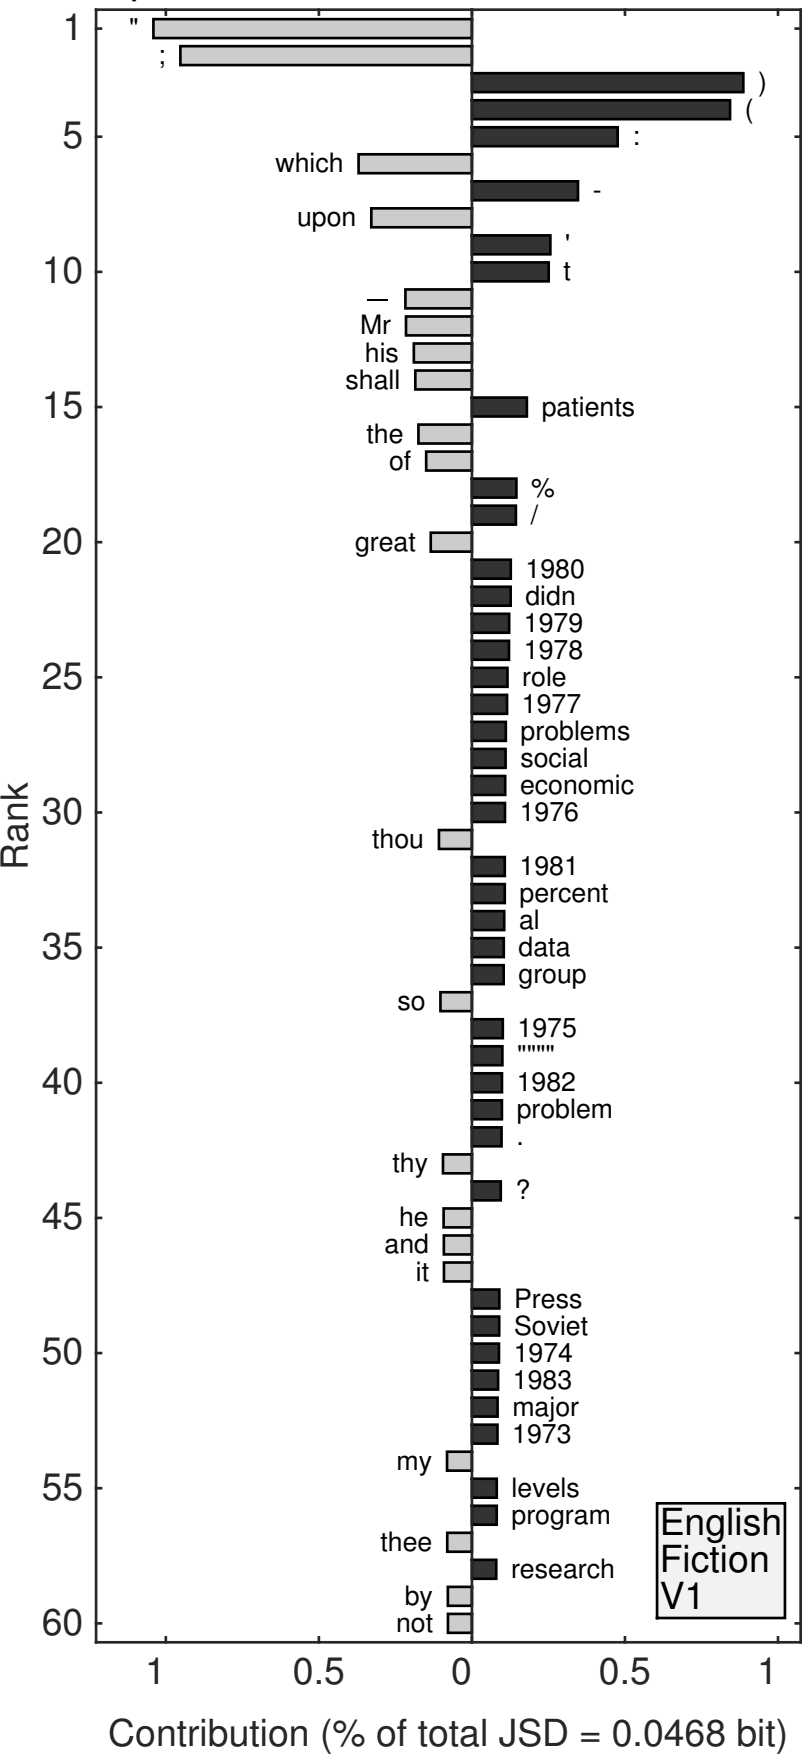

# Top JSD contributions: 1880s to 1990s

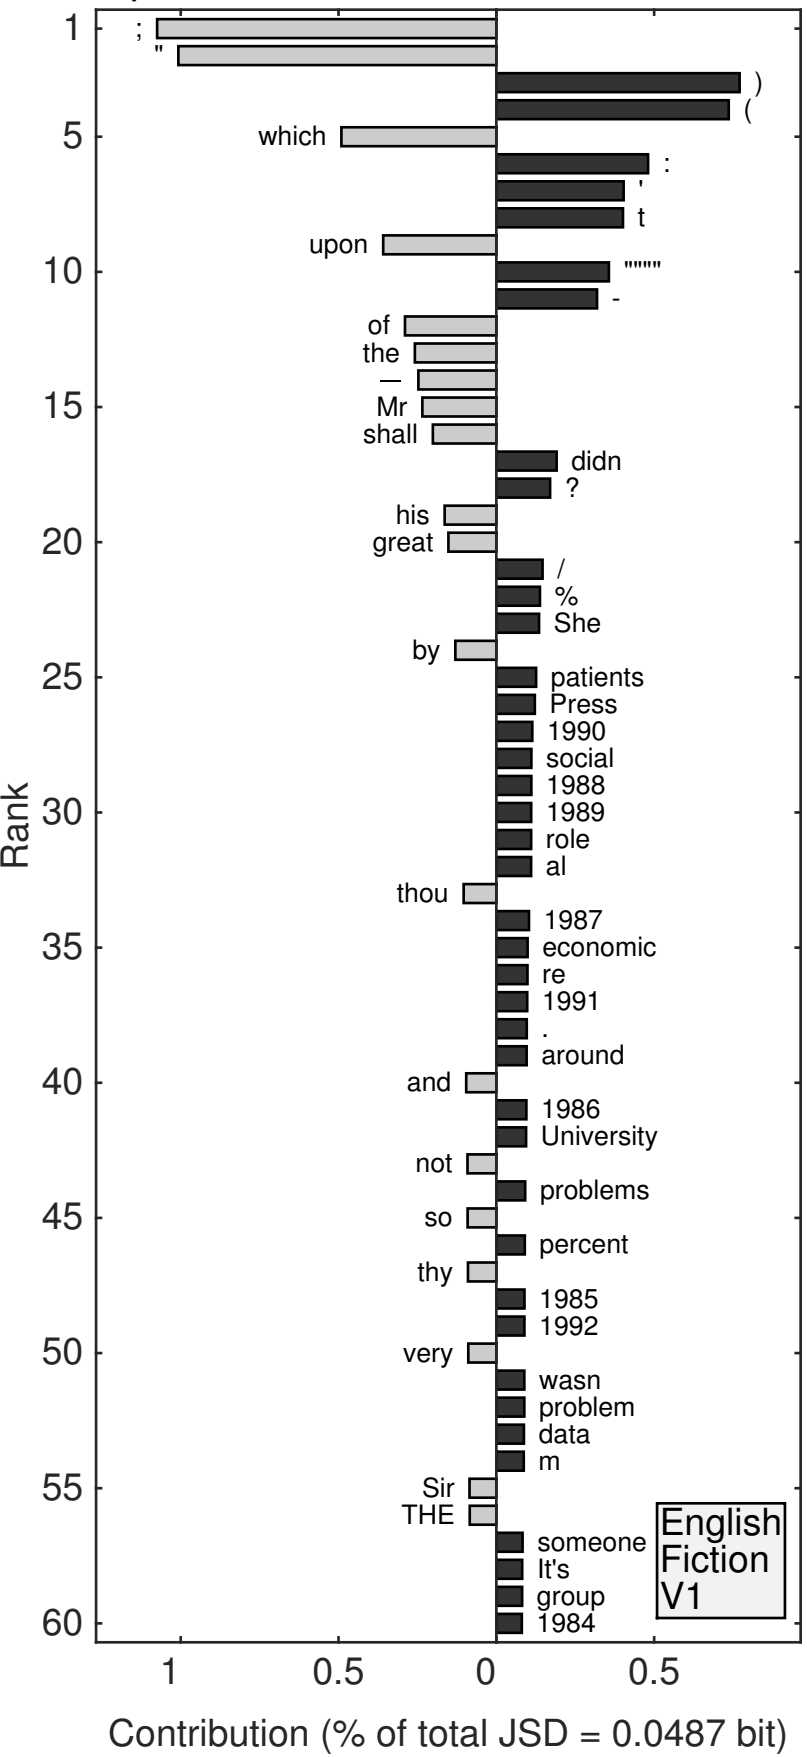

# Top JSD contributions: 1890s to 1900s

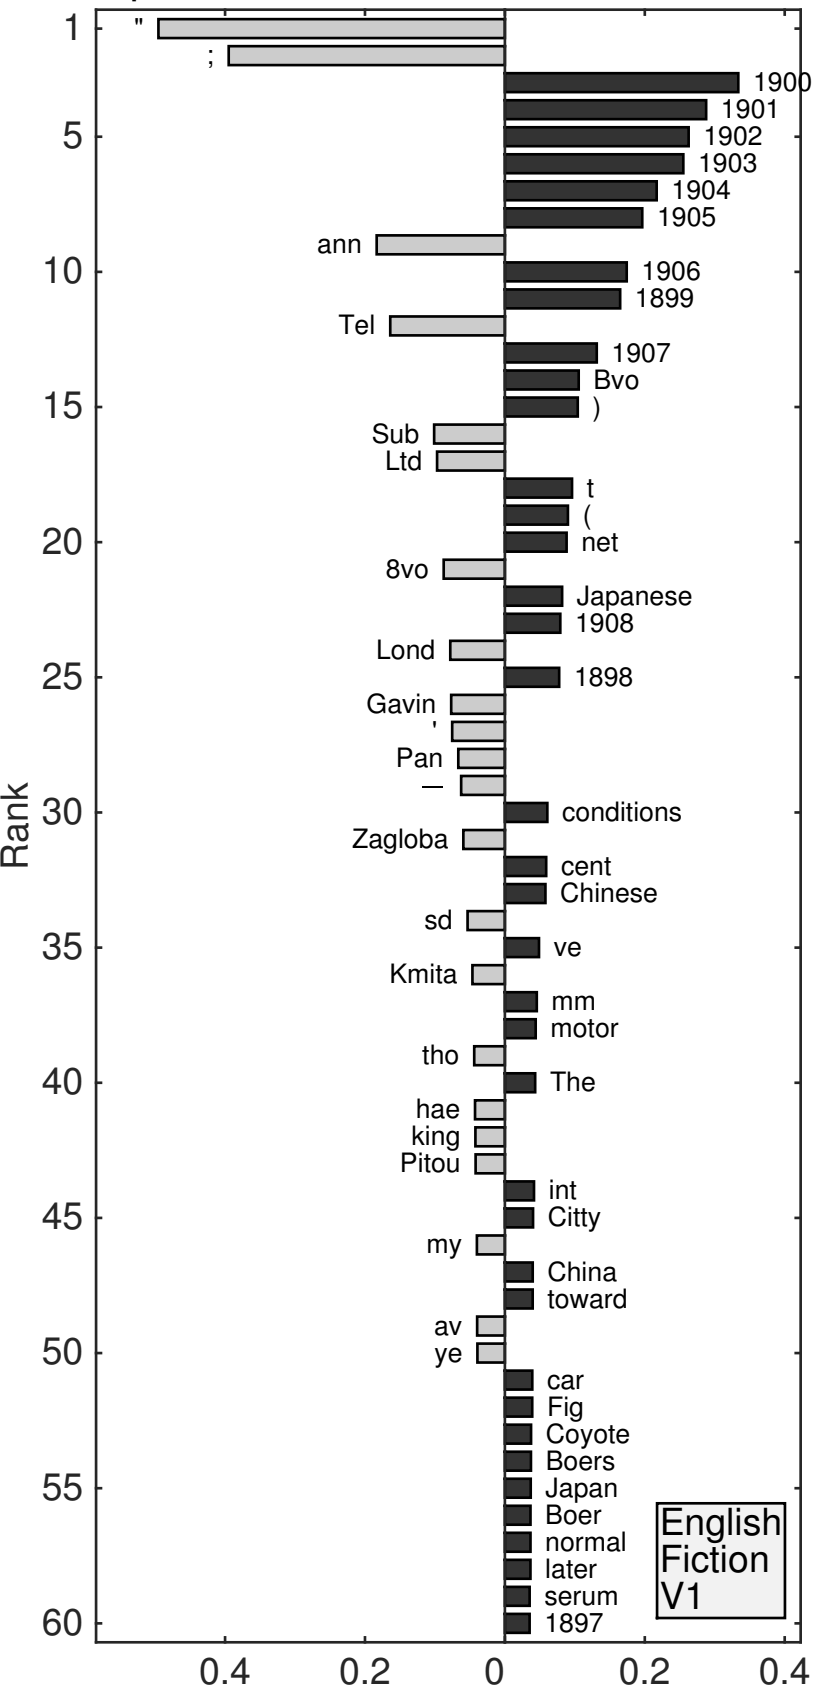

Contribution (% of total JSD = 0.00292 bit)



# Top JSD contributions: 1890s to 1910s

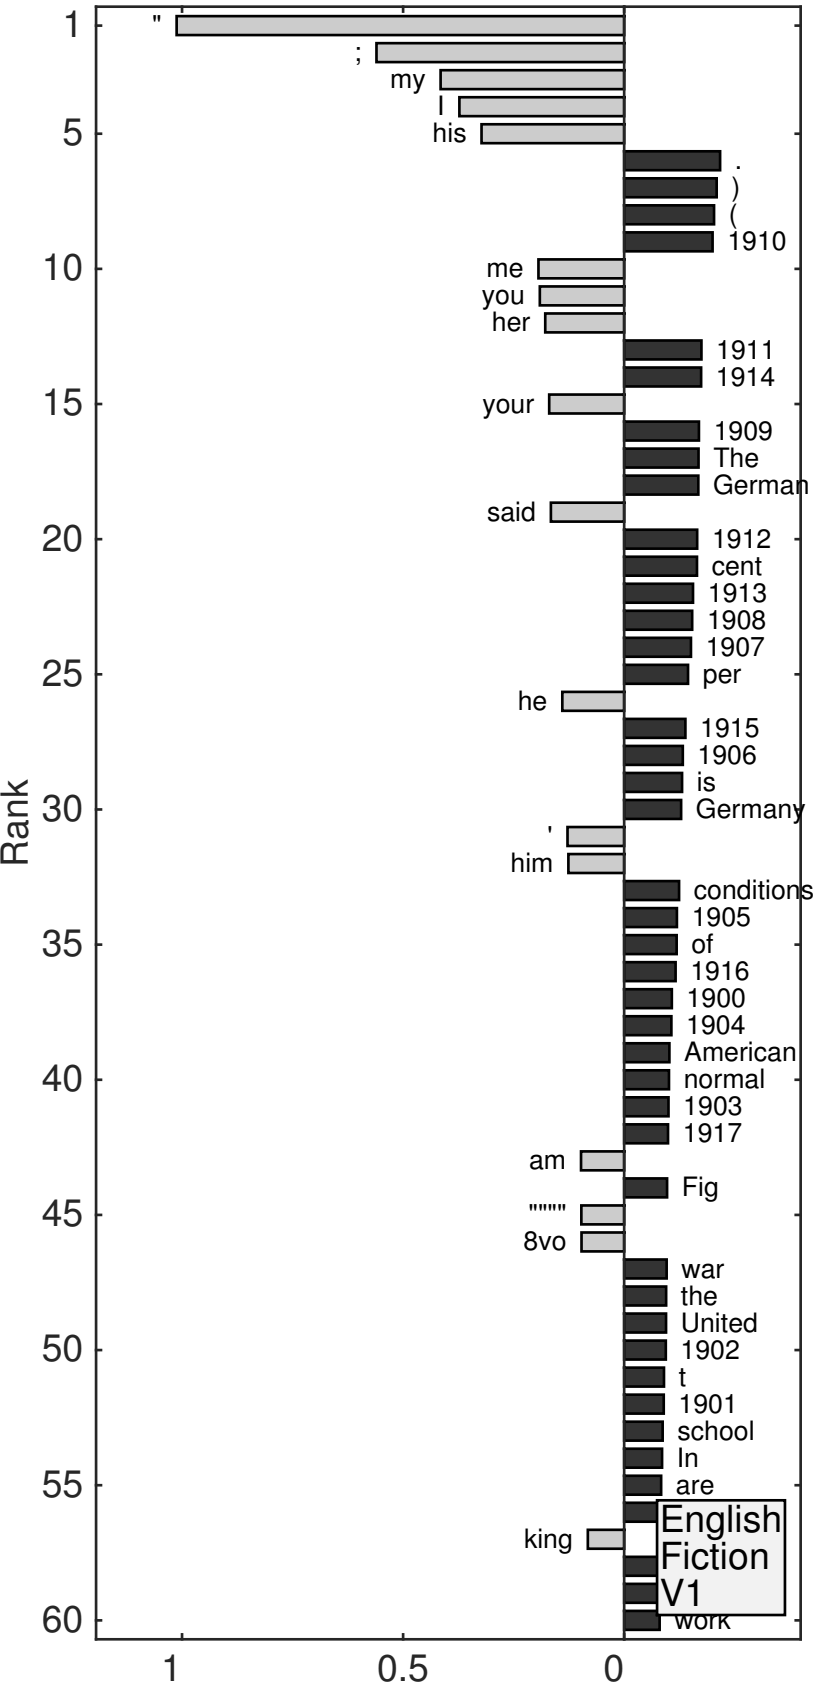

Contribution (% of total JSD = 0.00899 bit)

# Top JSD contributions: 1890s to 1920s

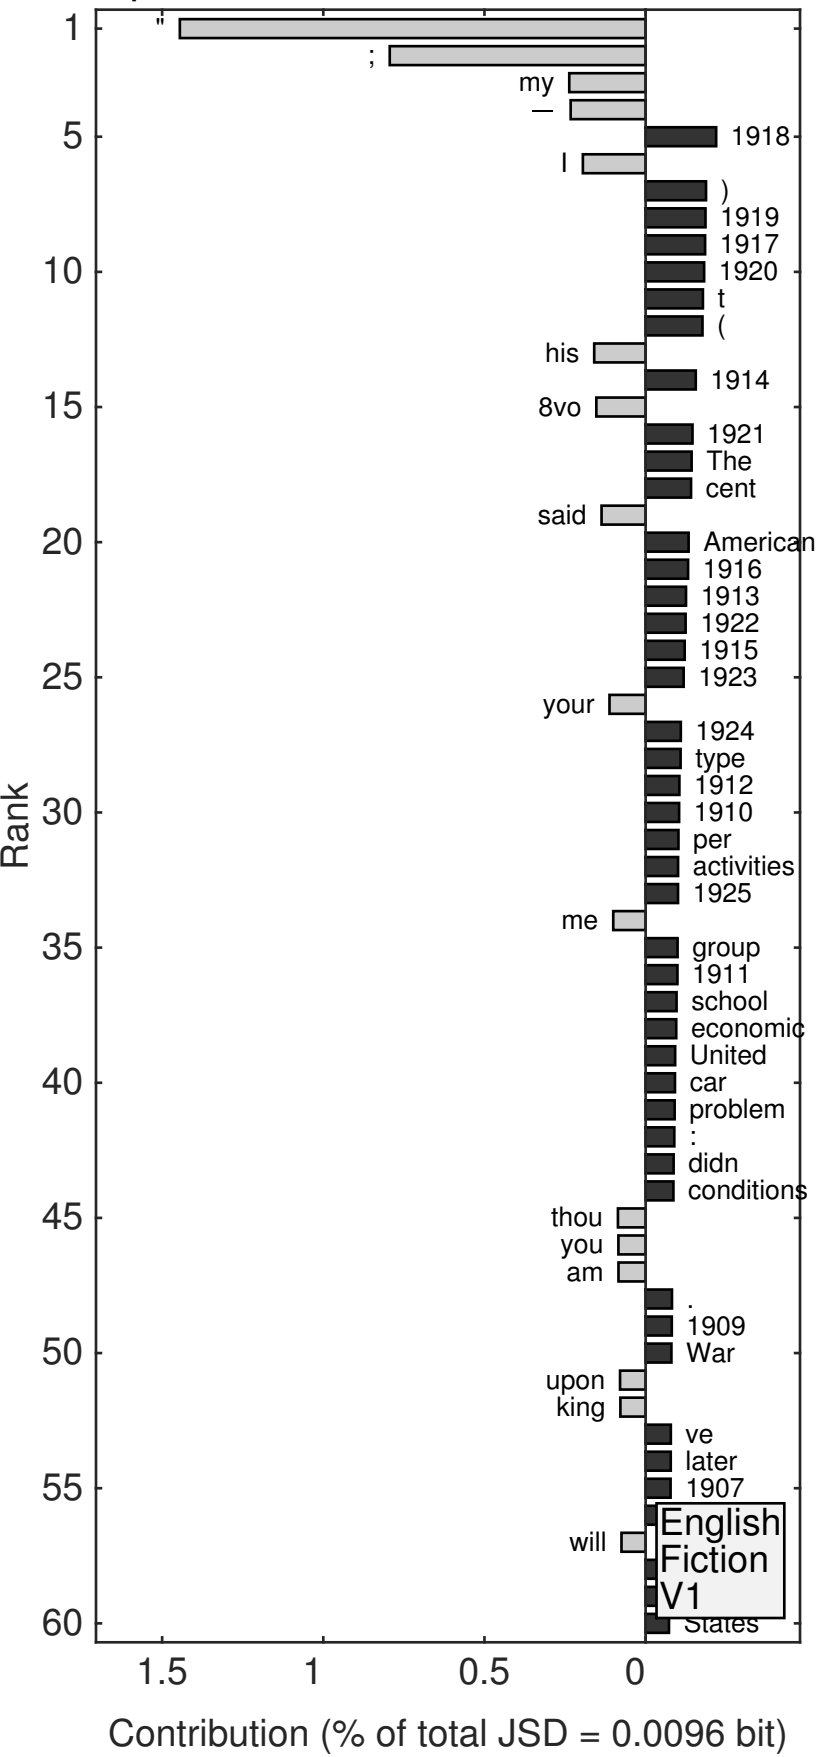

# Top JSD contributions: 1890s to 1930s

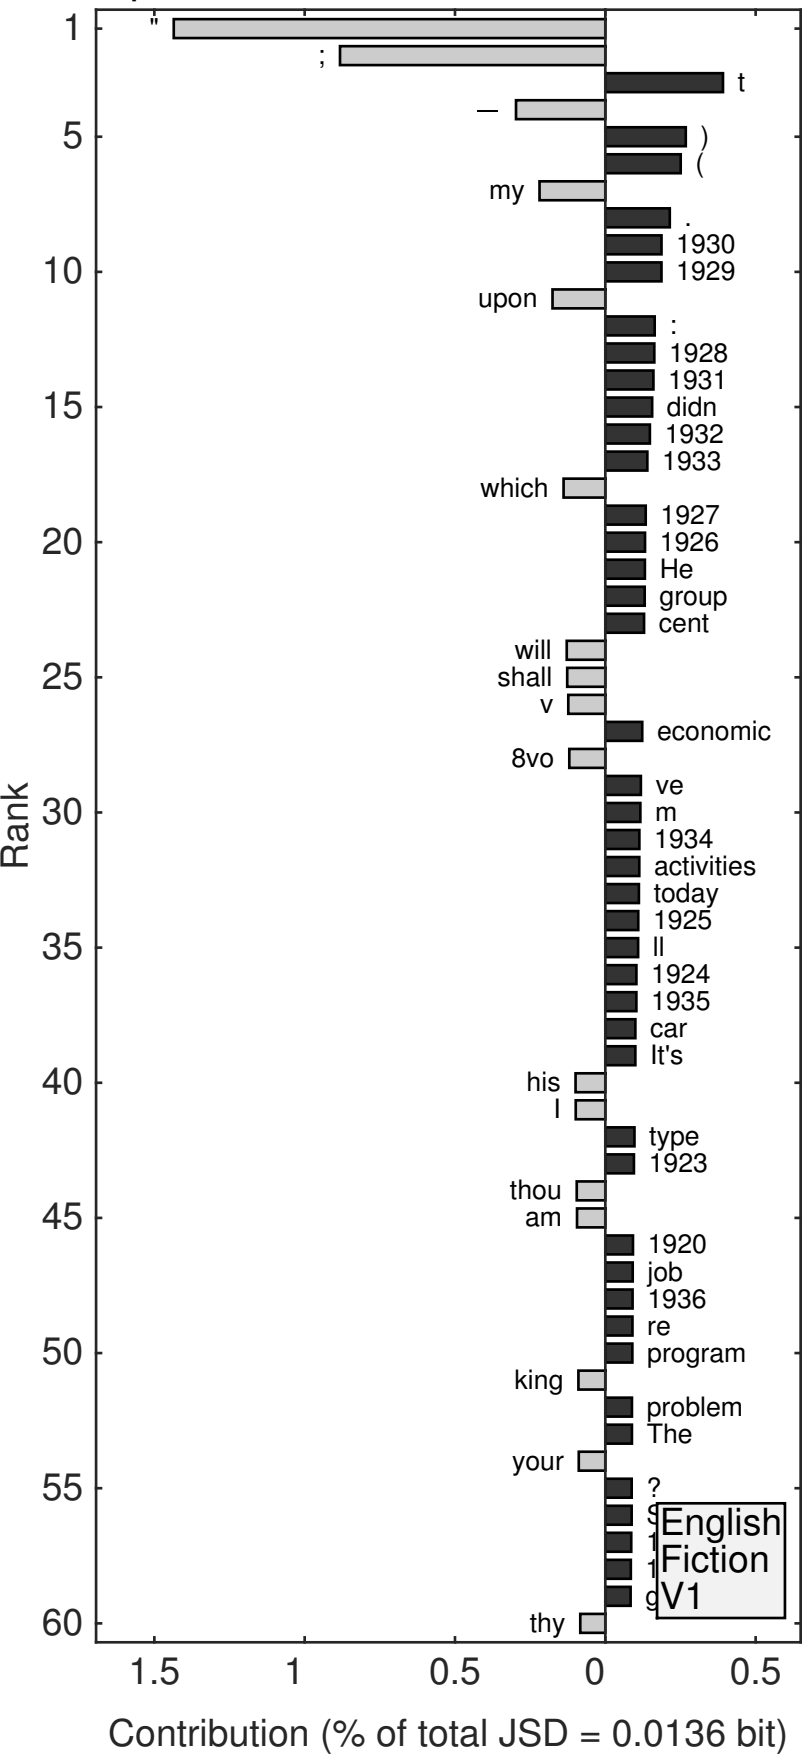

# Top JSD contributions: 1890s to 1940s

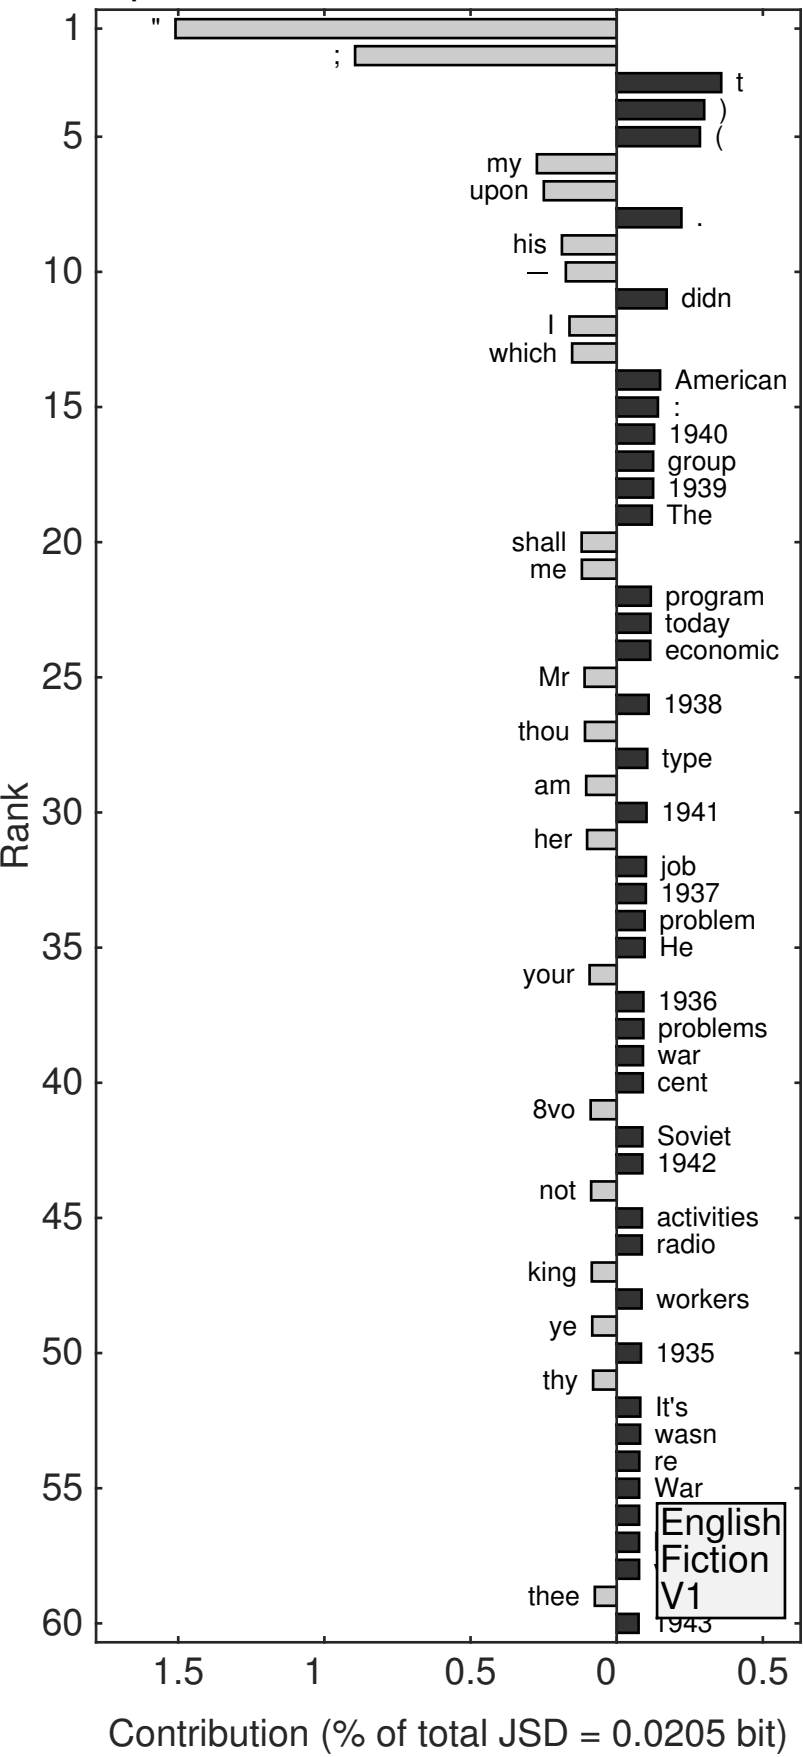

# Top JSD contributions: 1890s to 1950s

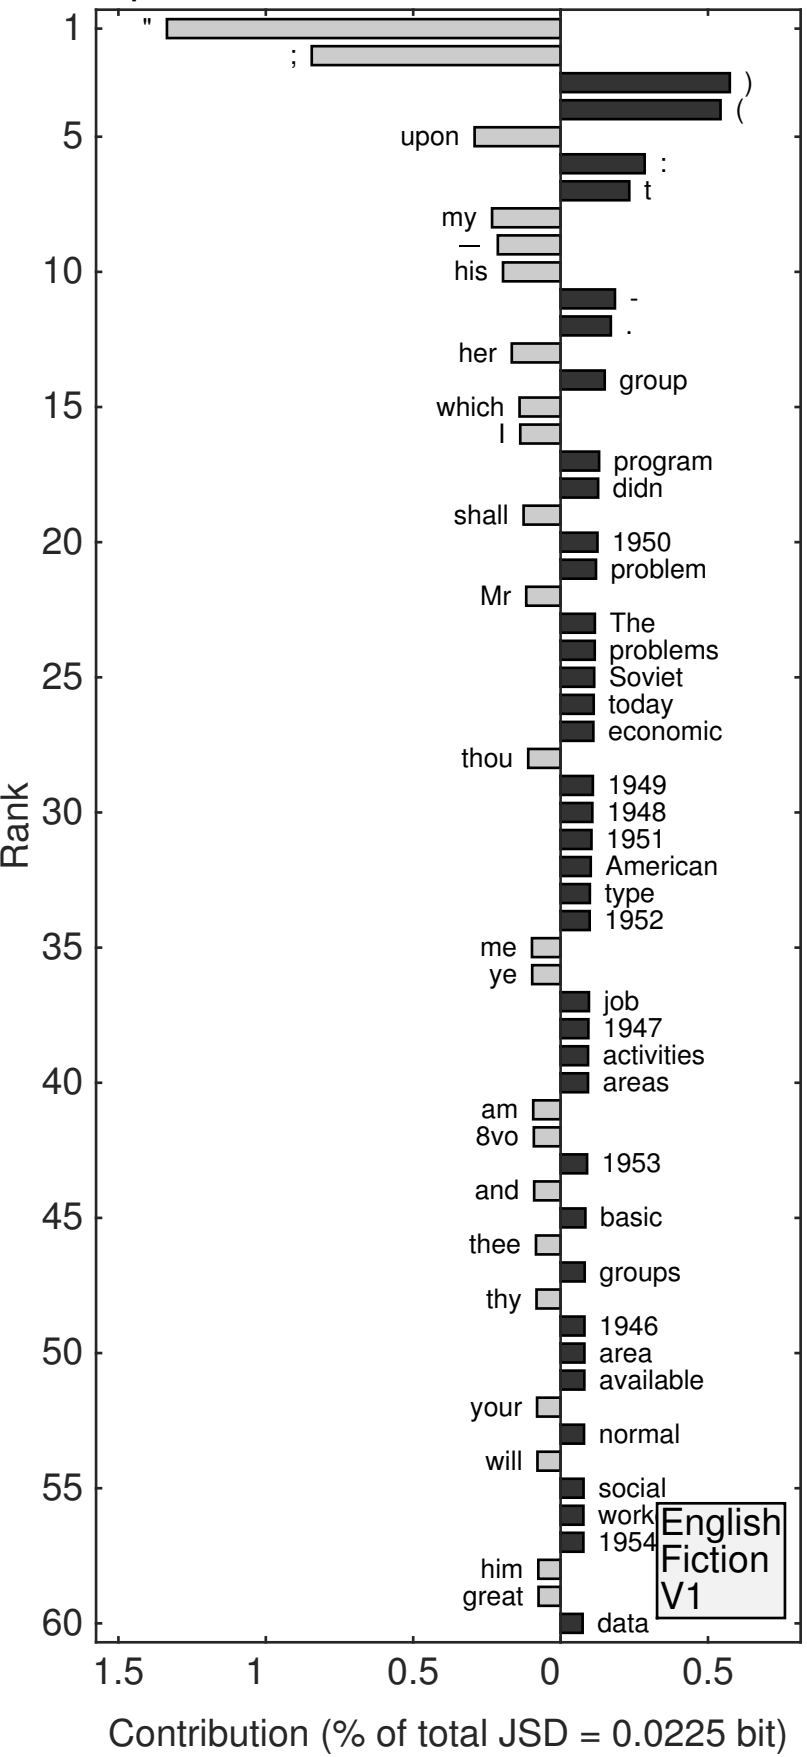

English Fiction V1

# Top JSD contributions: 1890s to 1960s

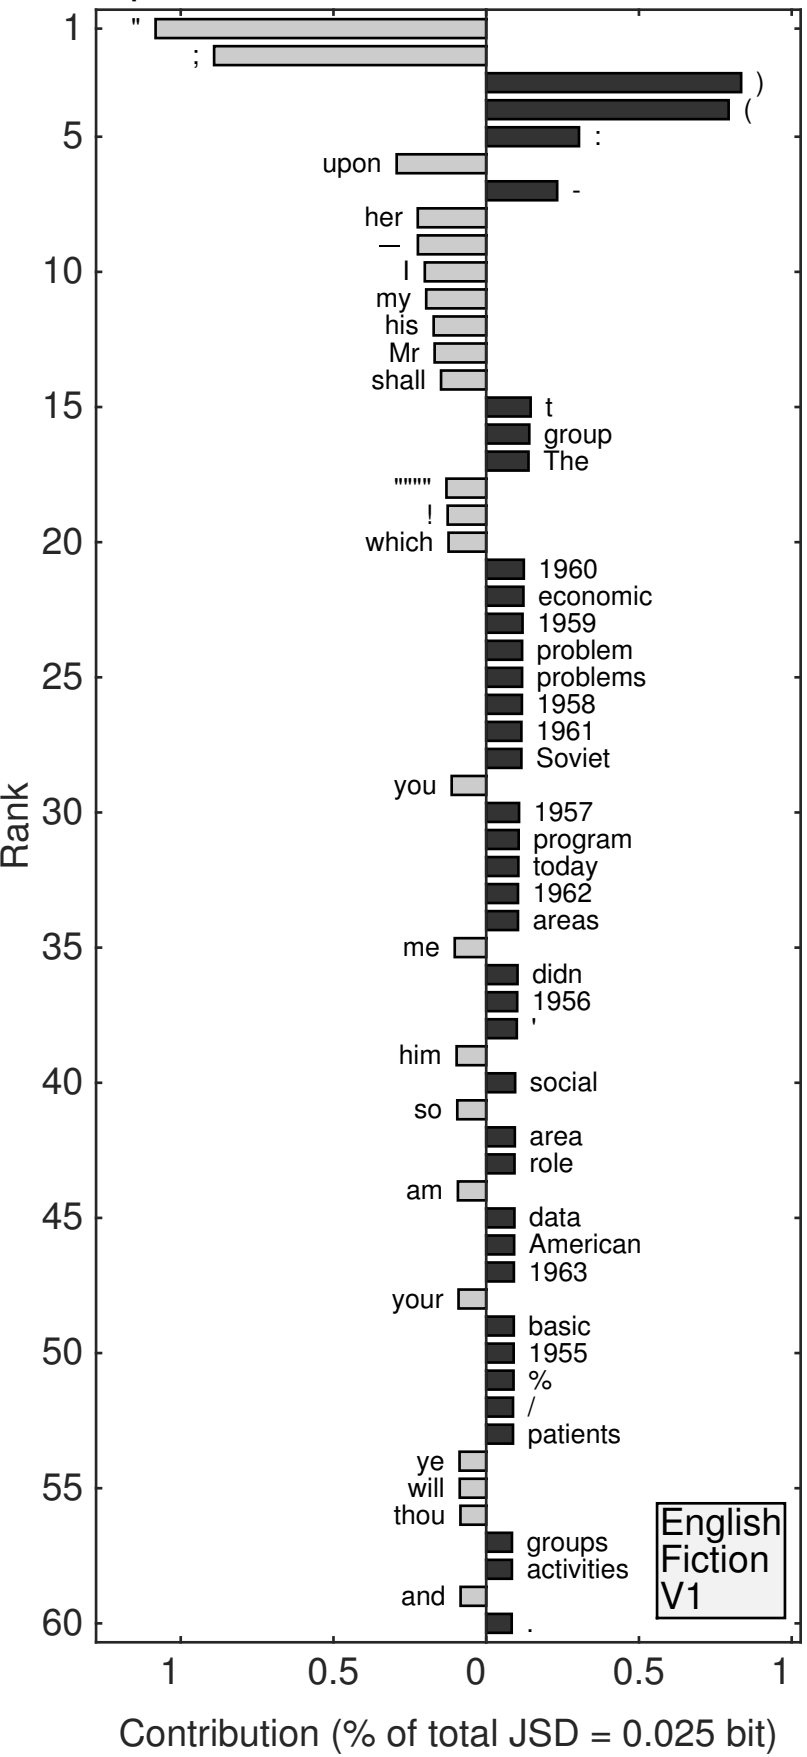

# Top JSD contributions: 1890s to 1970s

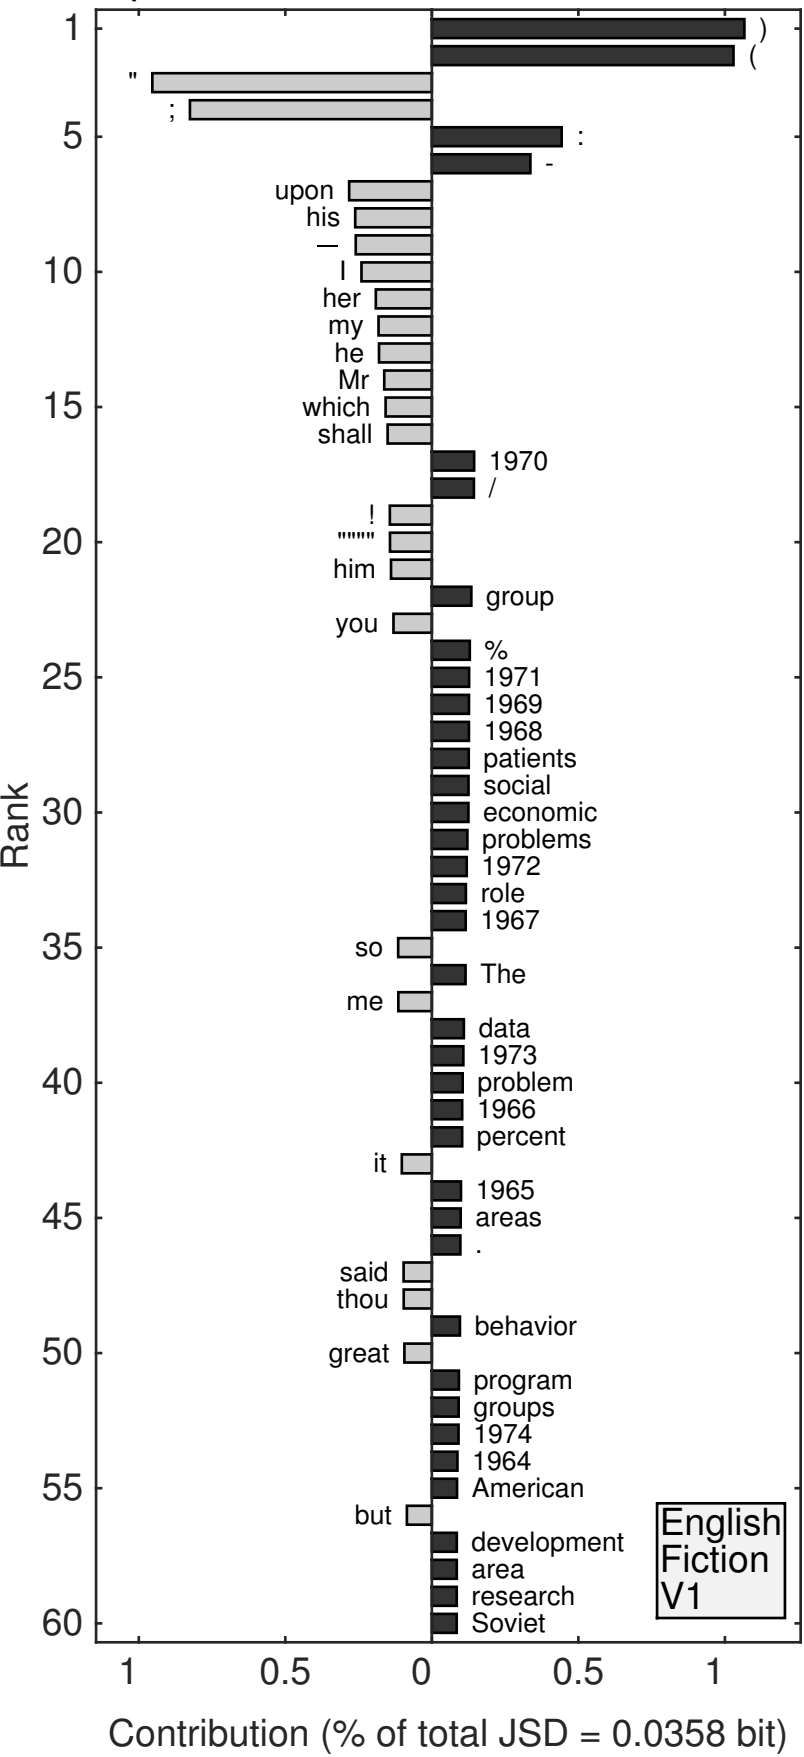

English Fiction V1

# Top JSD contributions: 1890s to 1980s

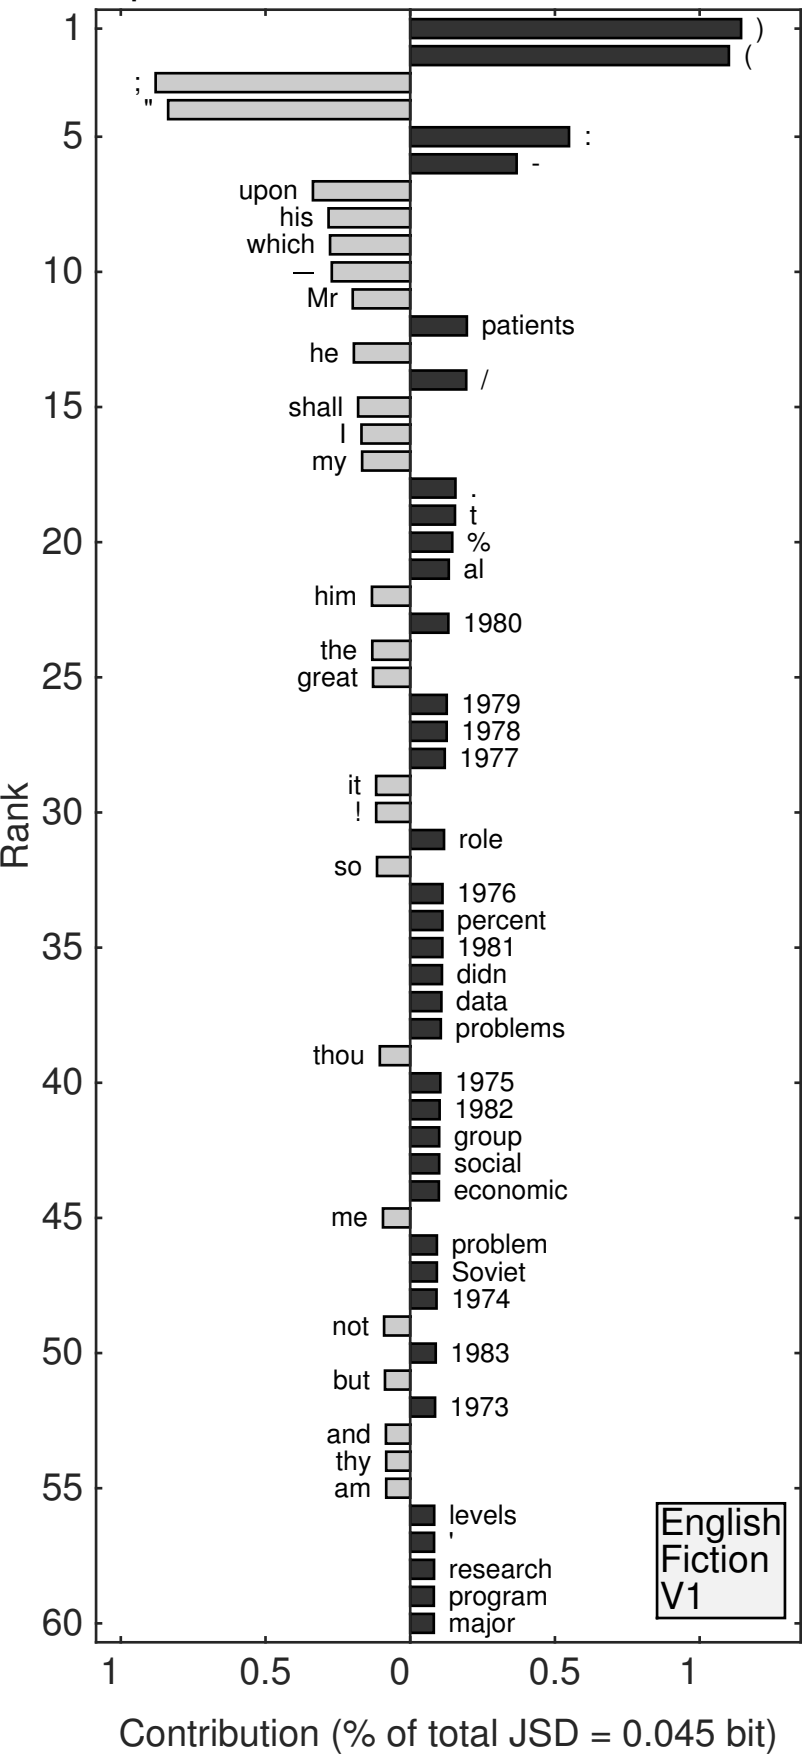



# Top JSD contributions: 1890s to 1990s

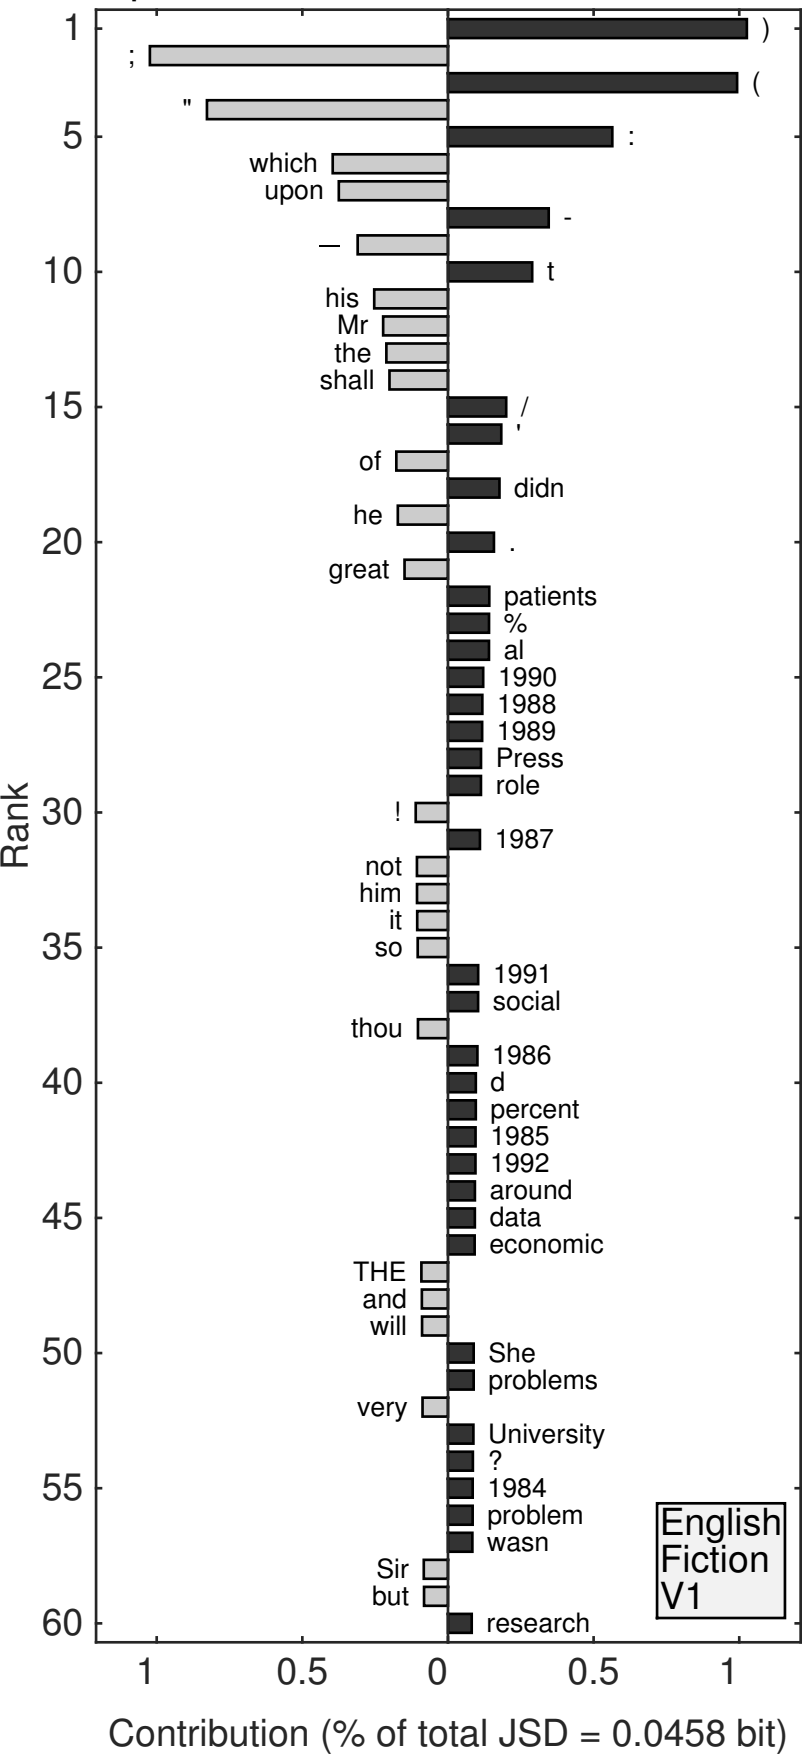

# Top JSD contributions: 1900s to 1910s

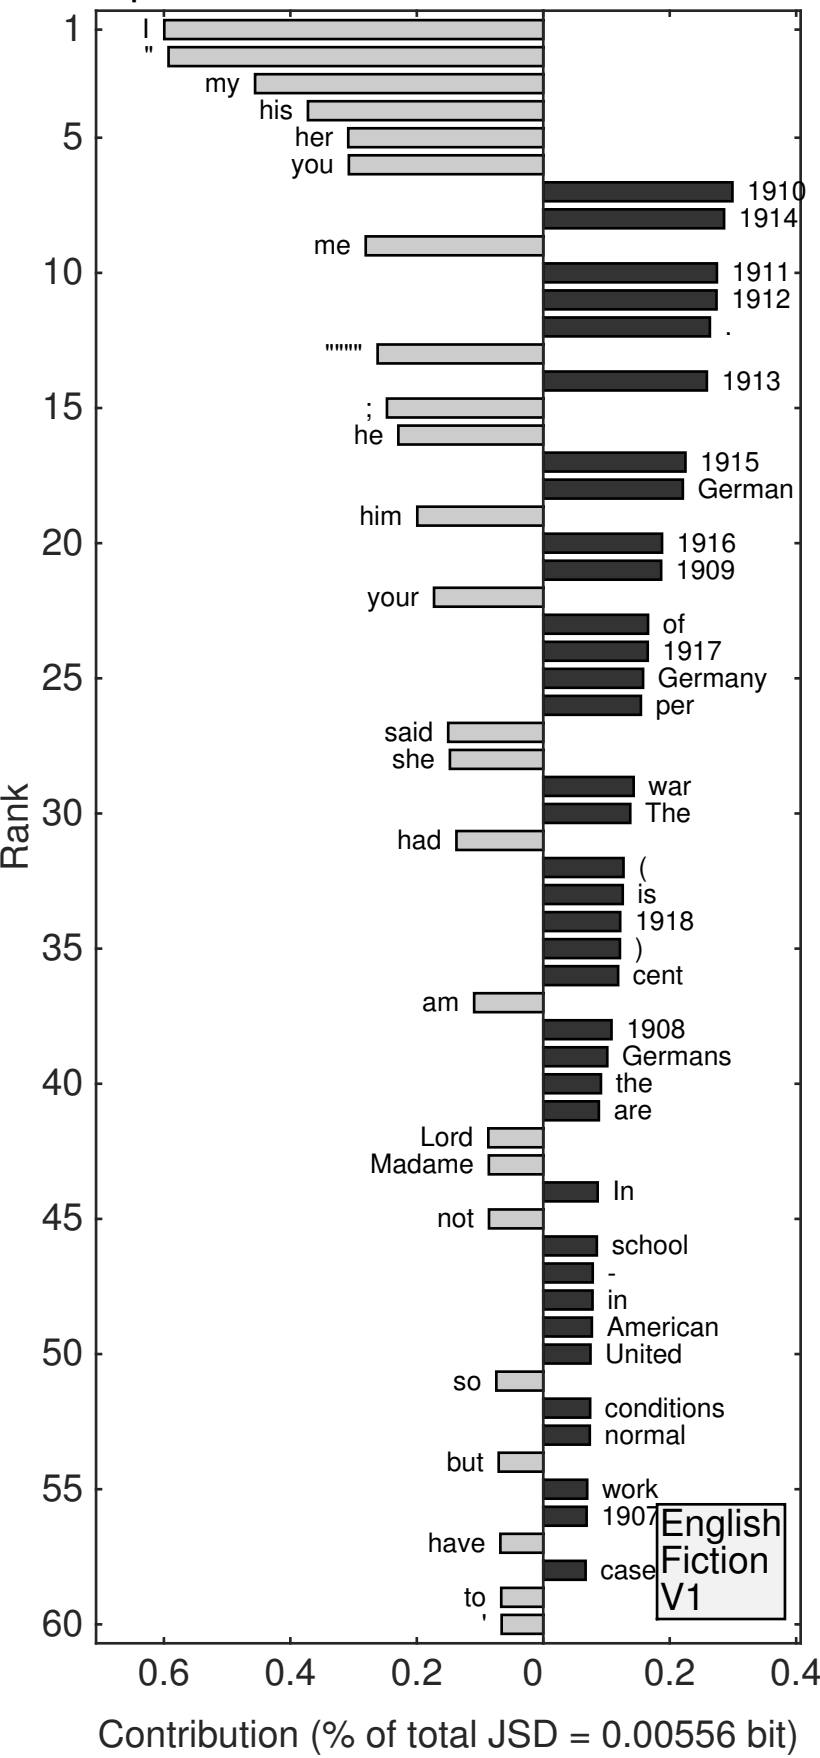

# Top JSD contributions: 1900s to 1920s

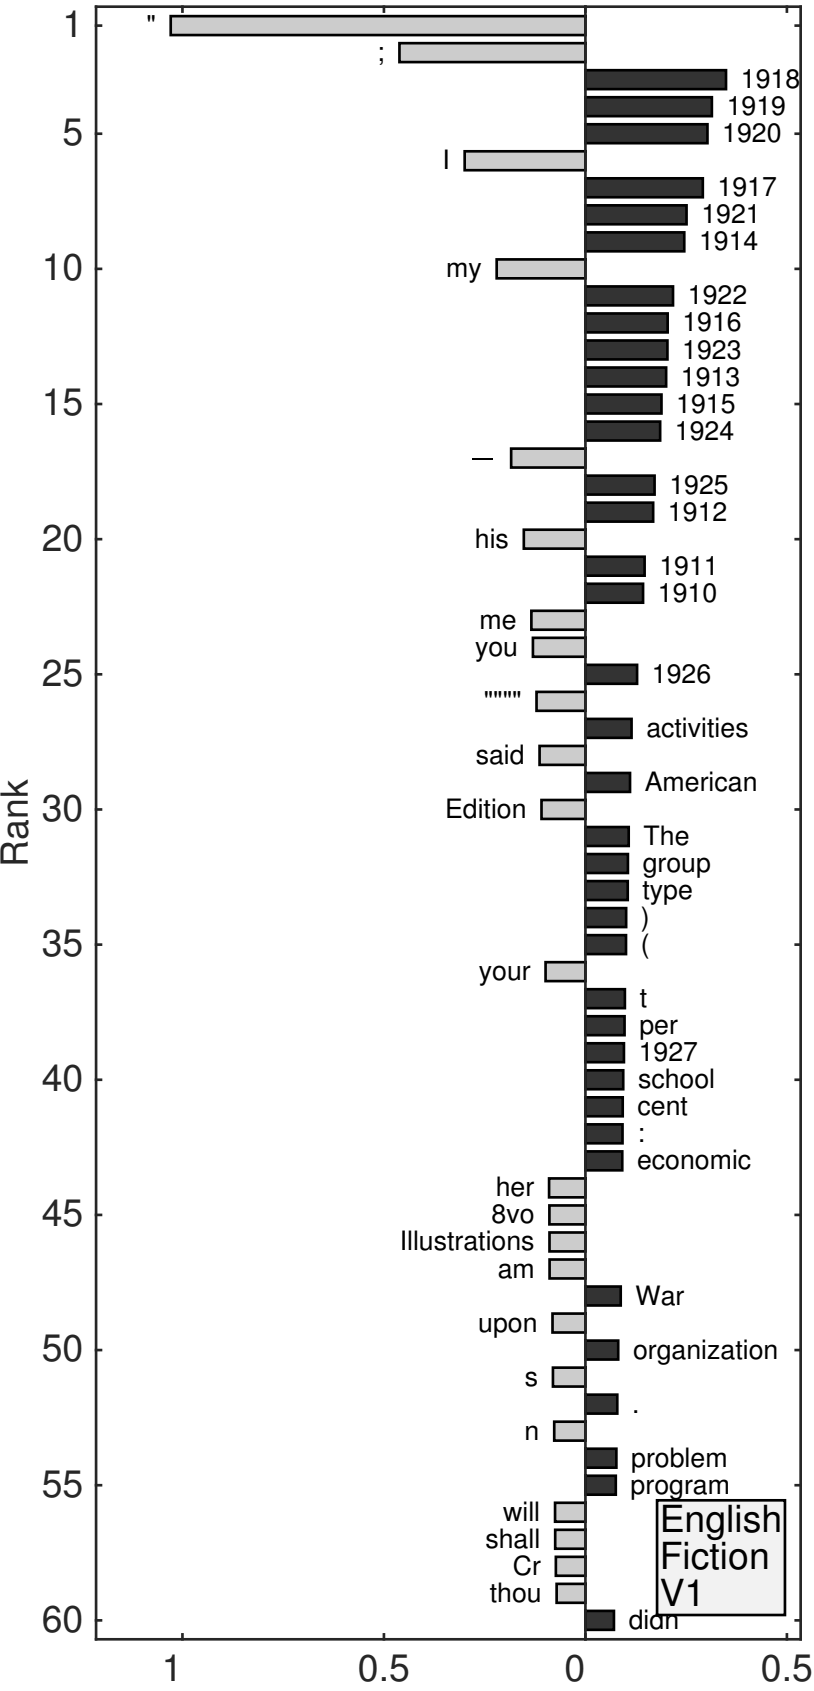

Contribution (% of total JSD = 0.00619 bit)

# Top JSD contributions: 1900s to 1930s

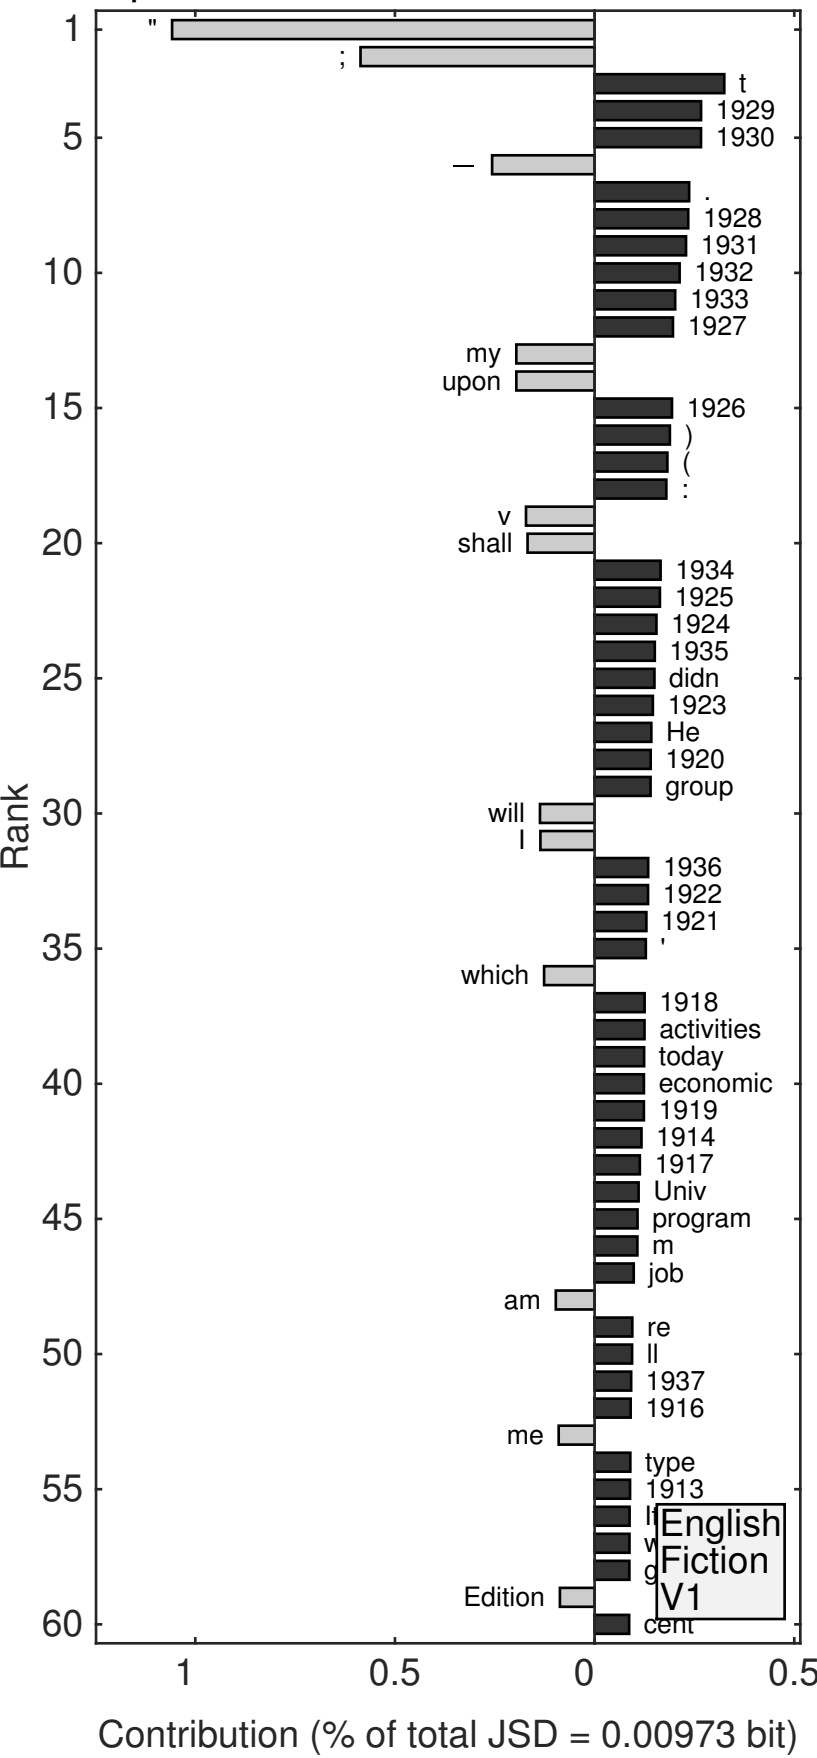

# Top JSD contributions: 1900s to 1940s

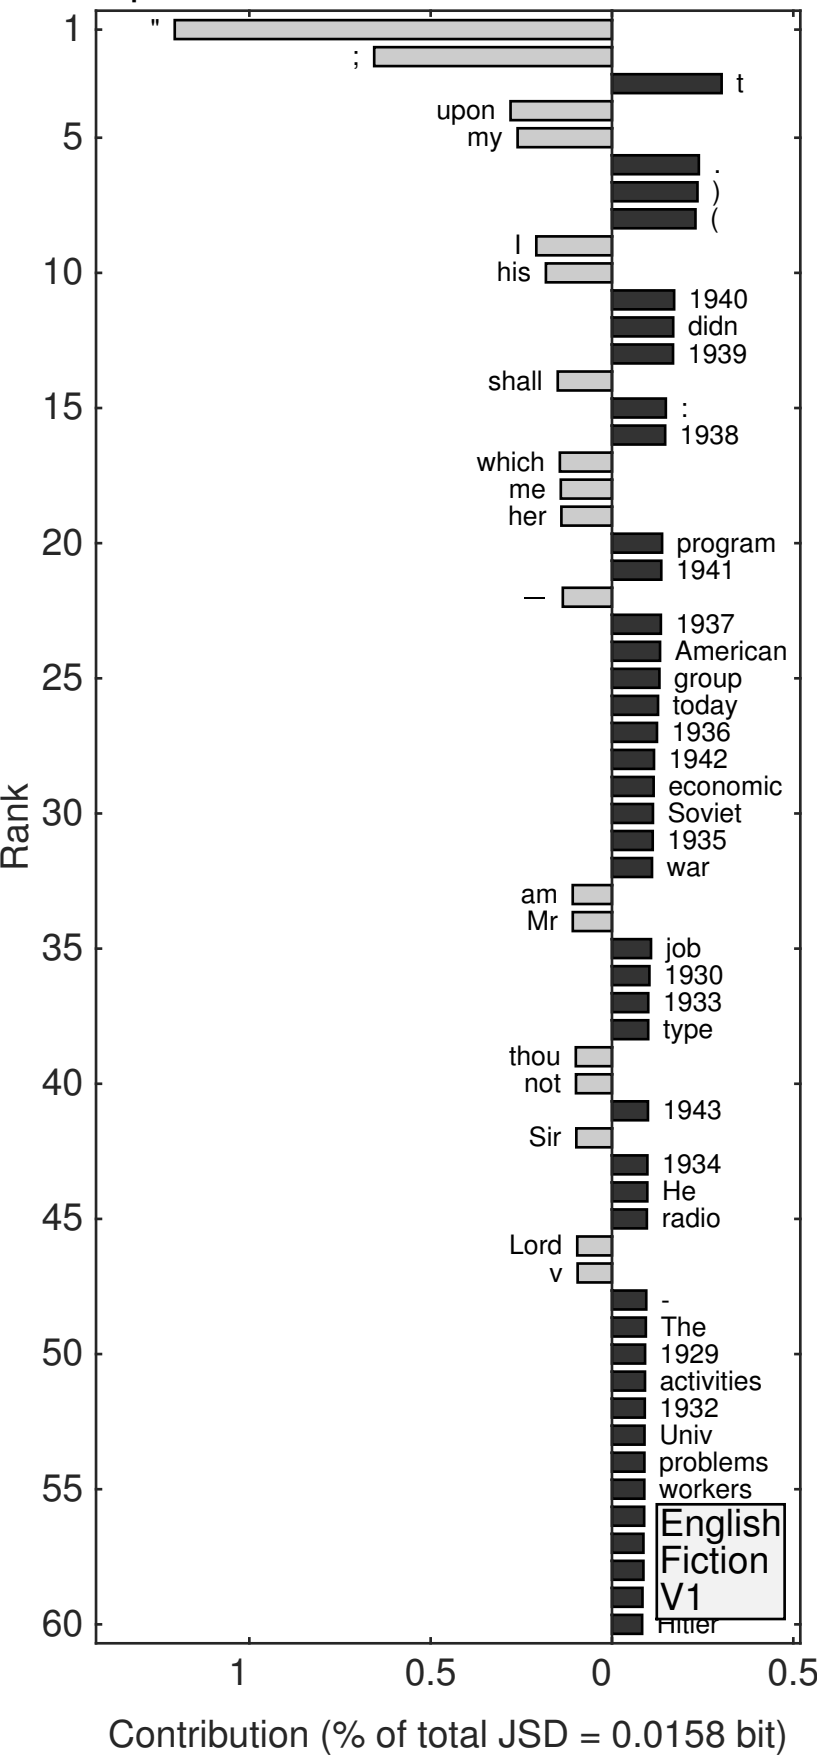

# Top JSD contributions: 1900s to 1950s

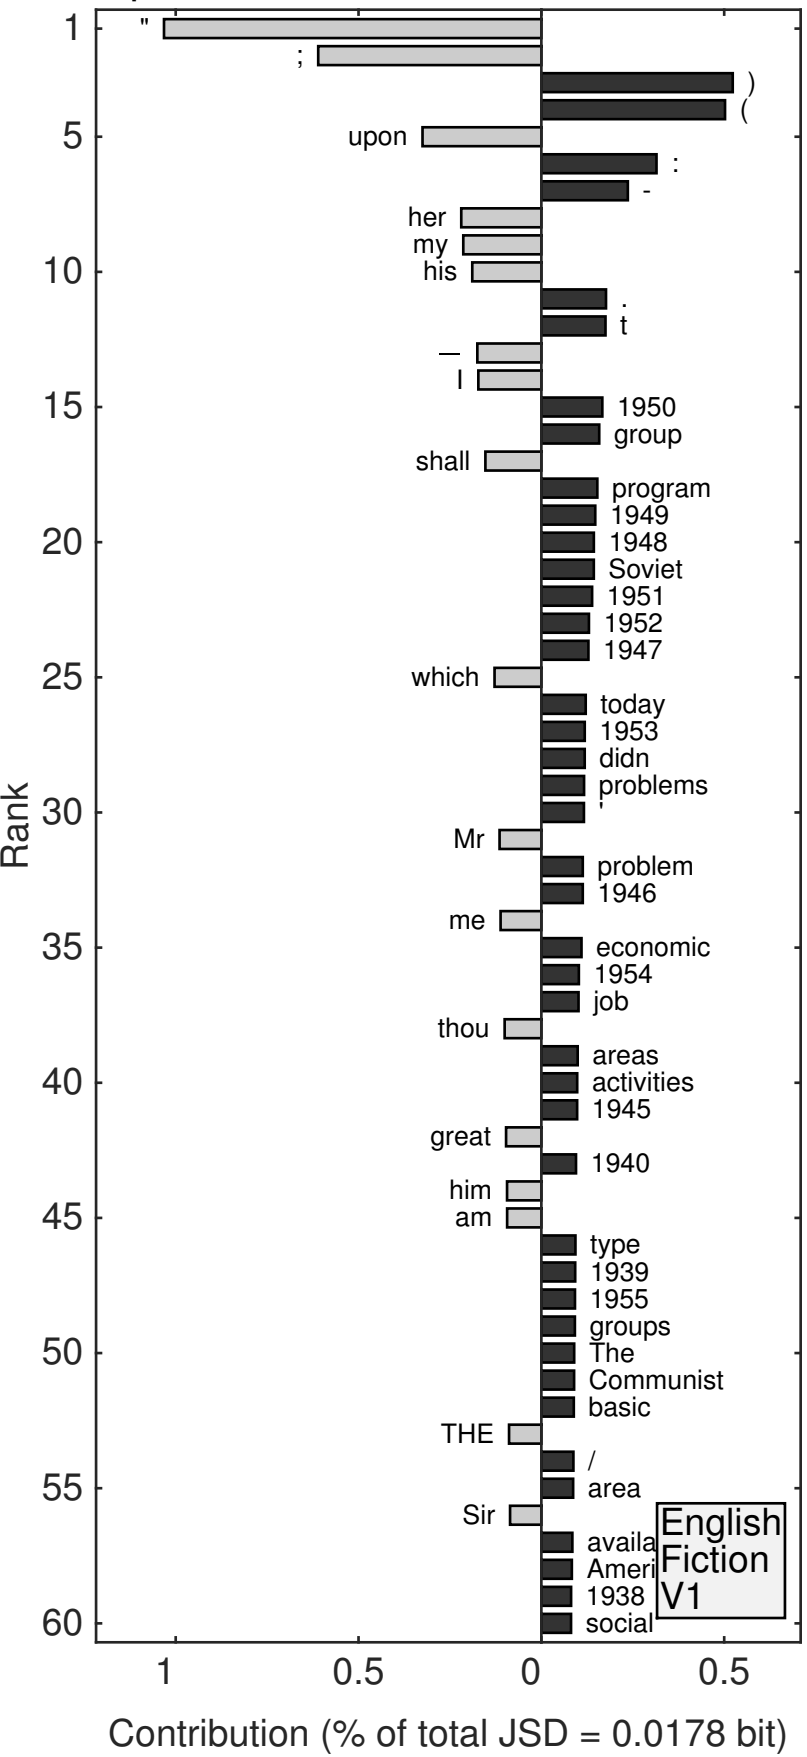

# Top JSD contributions: 1900s to 1960s

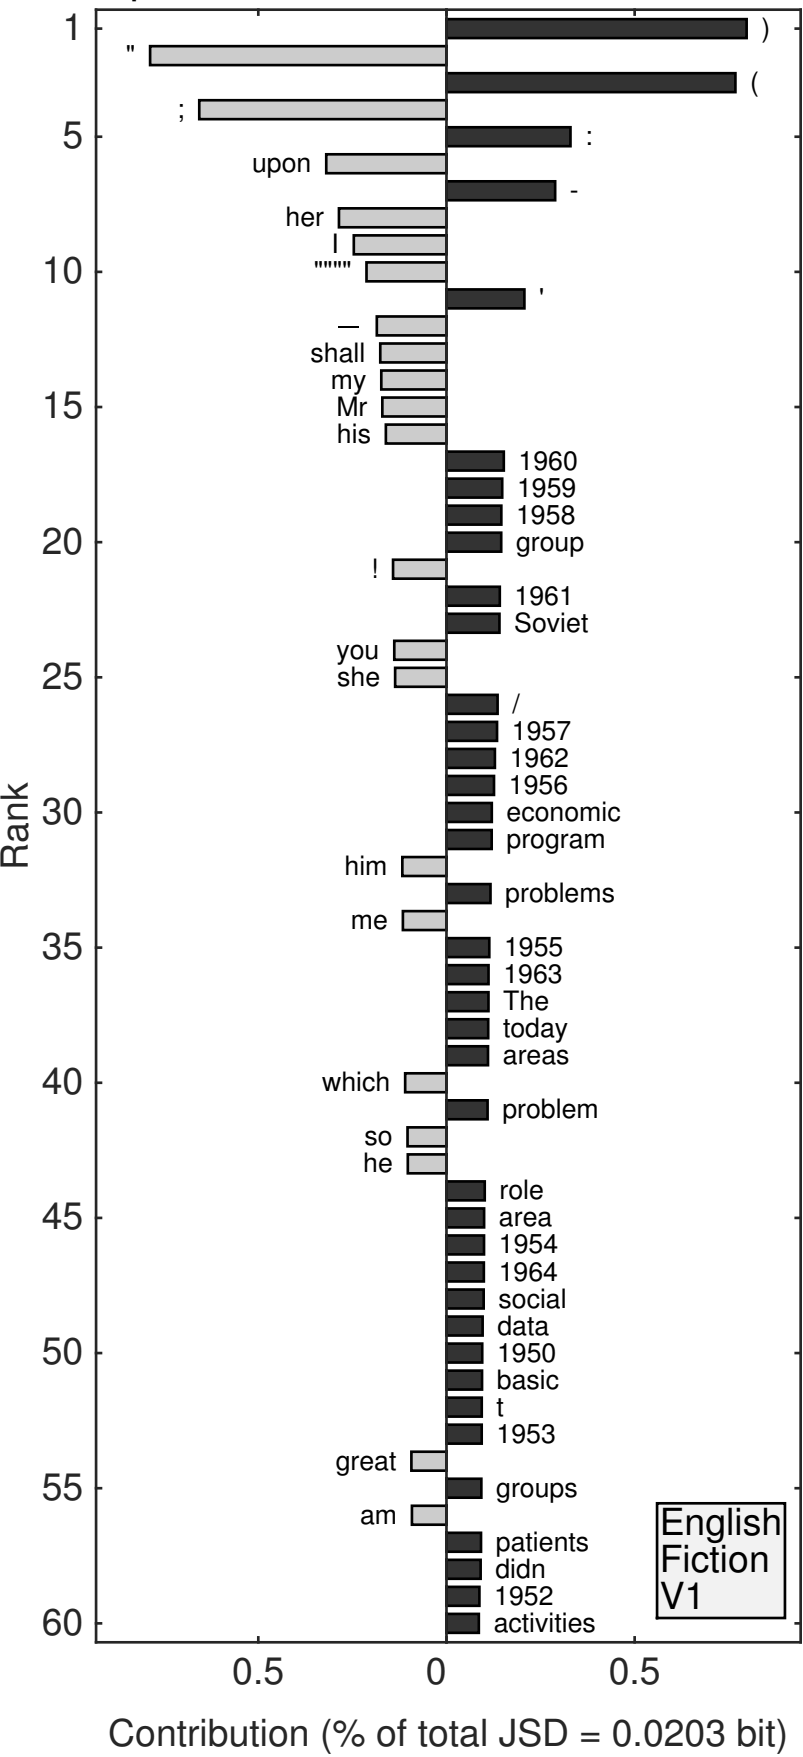

# Top JSD contributions: 1900s to 1970s

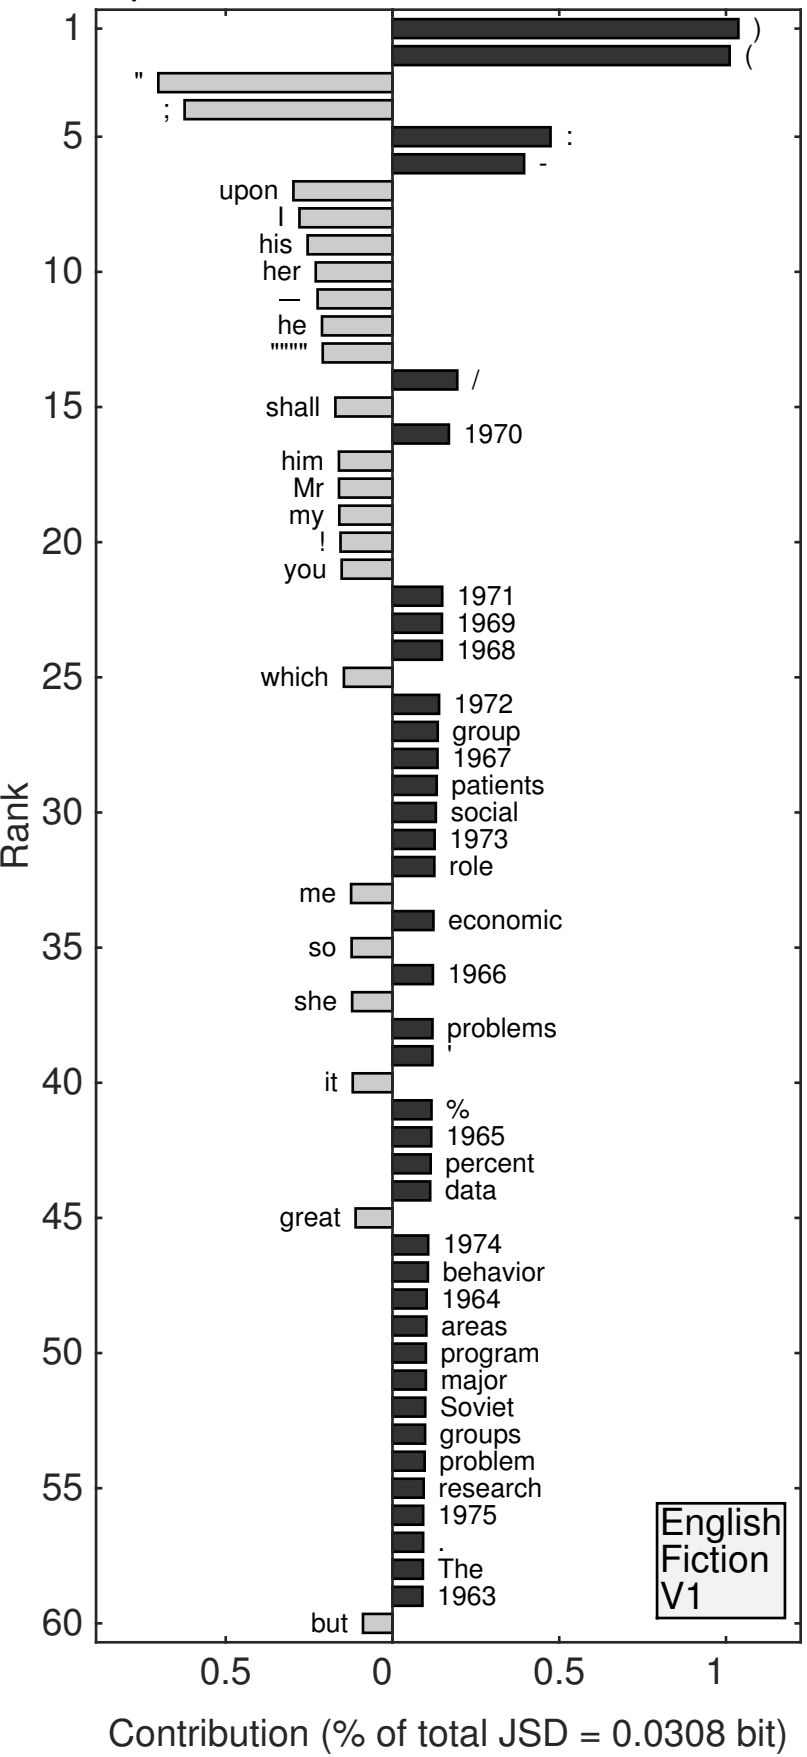

English Fiction V1



# Top JSD contributions: 1900s to 1980s

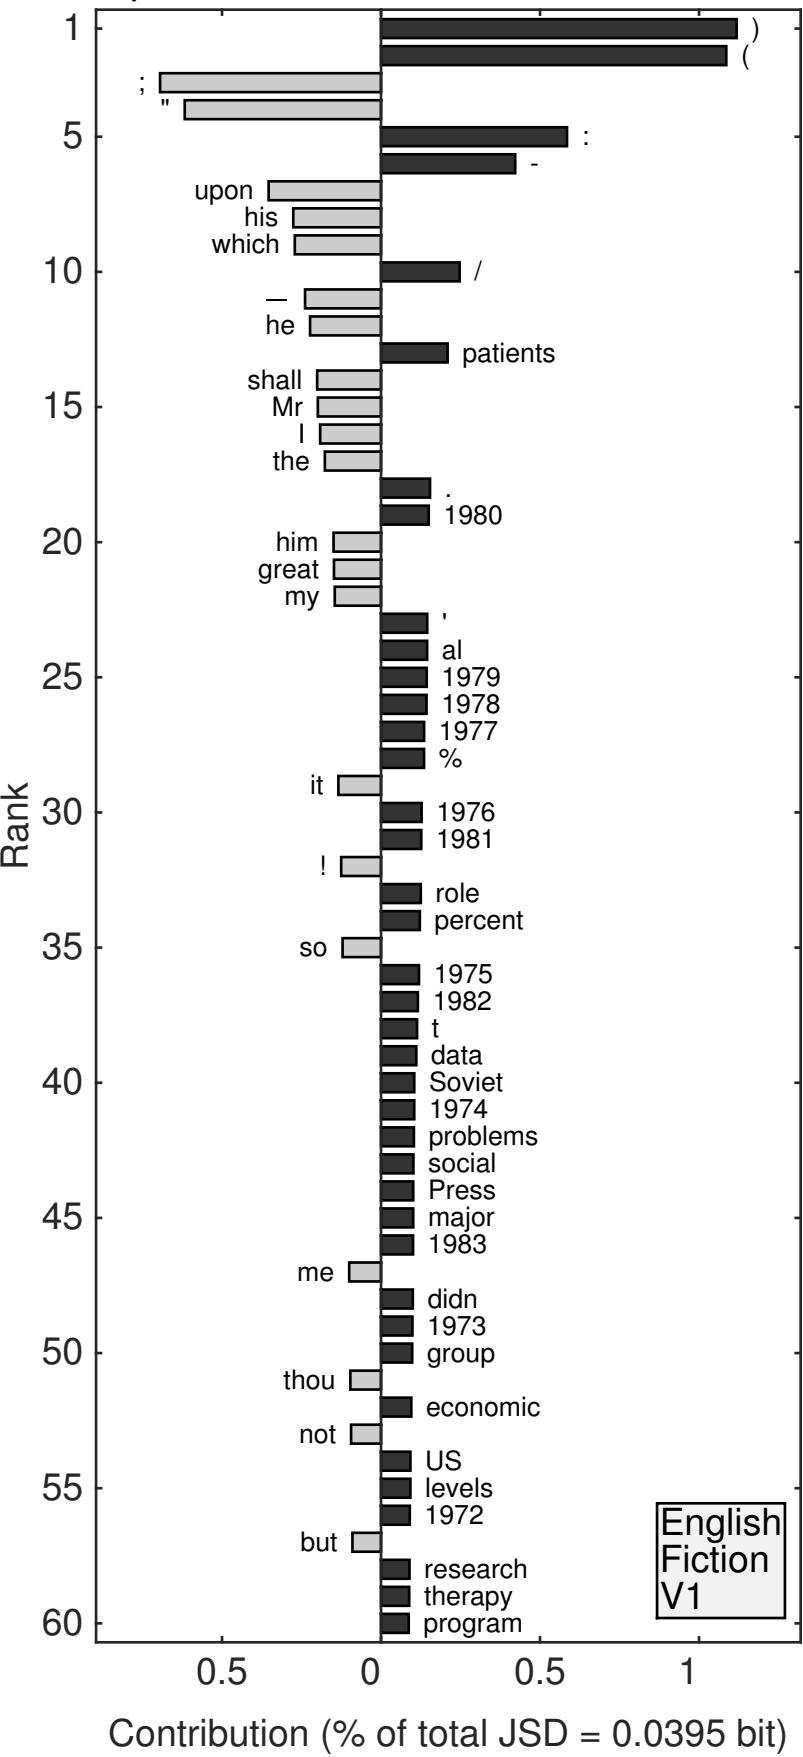

English Fiction V1

# Top JSD contributions: 1900s to 1990s

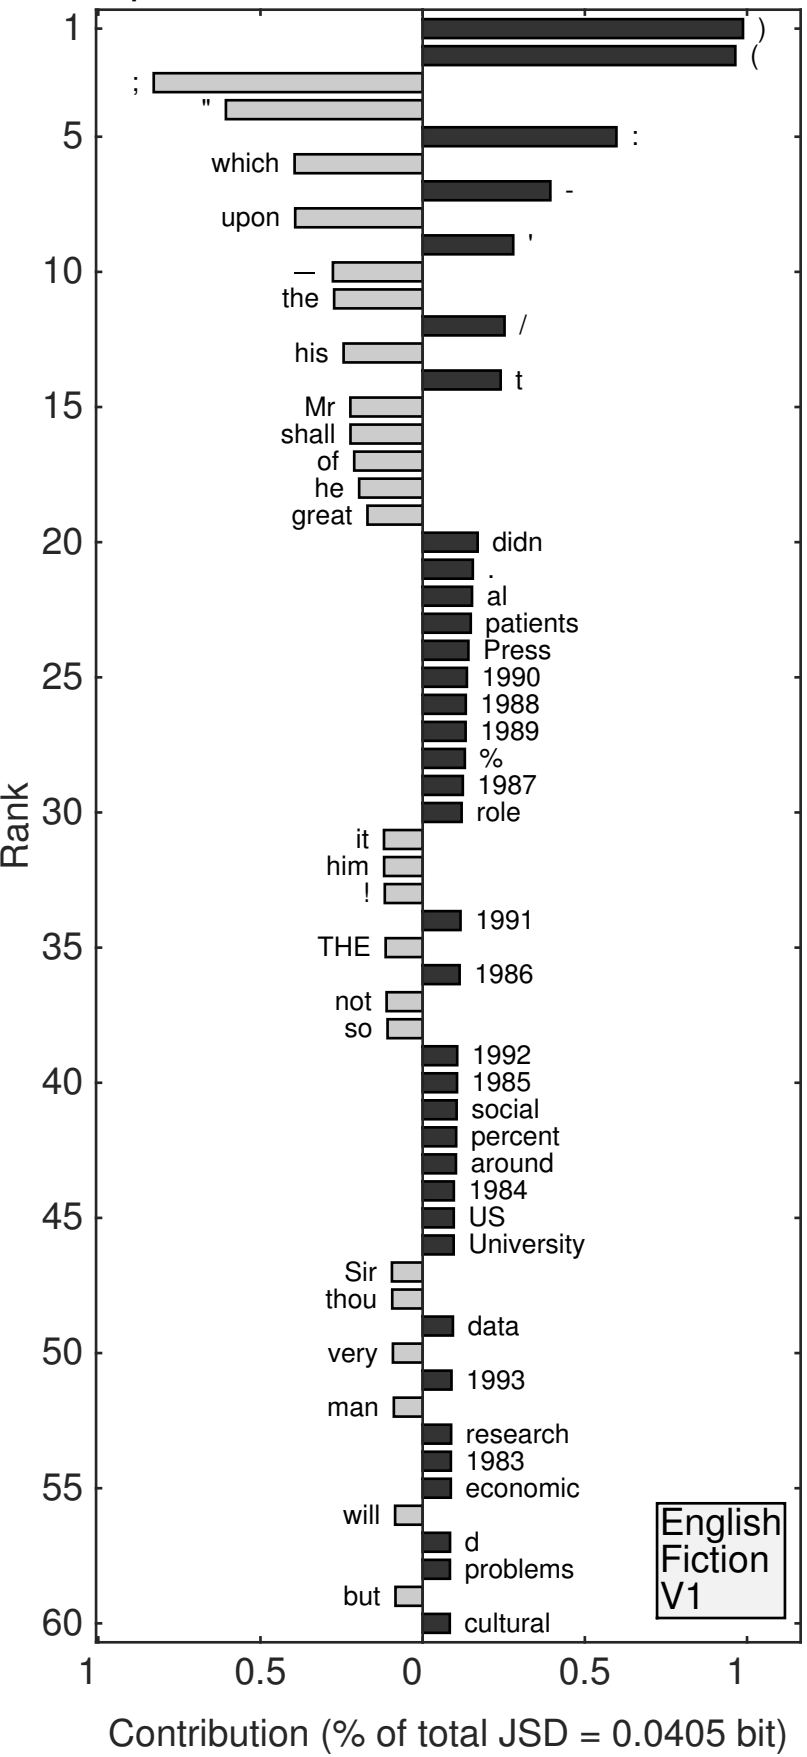

English Fiction V1

# Top JSD contributions: 1910s to 1920s

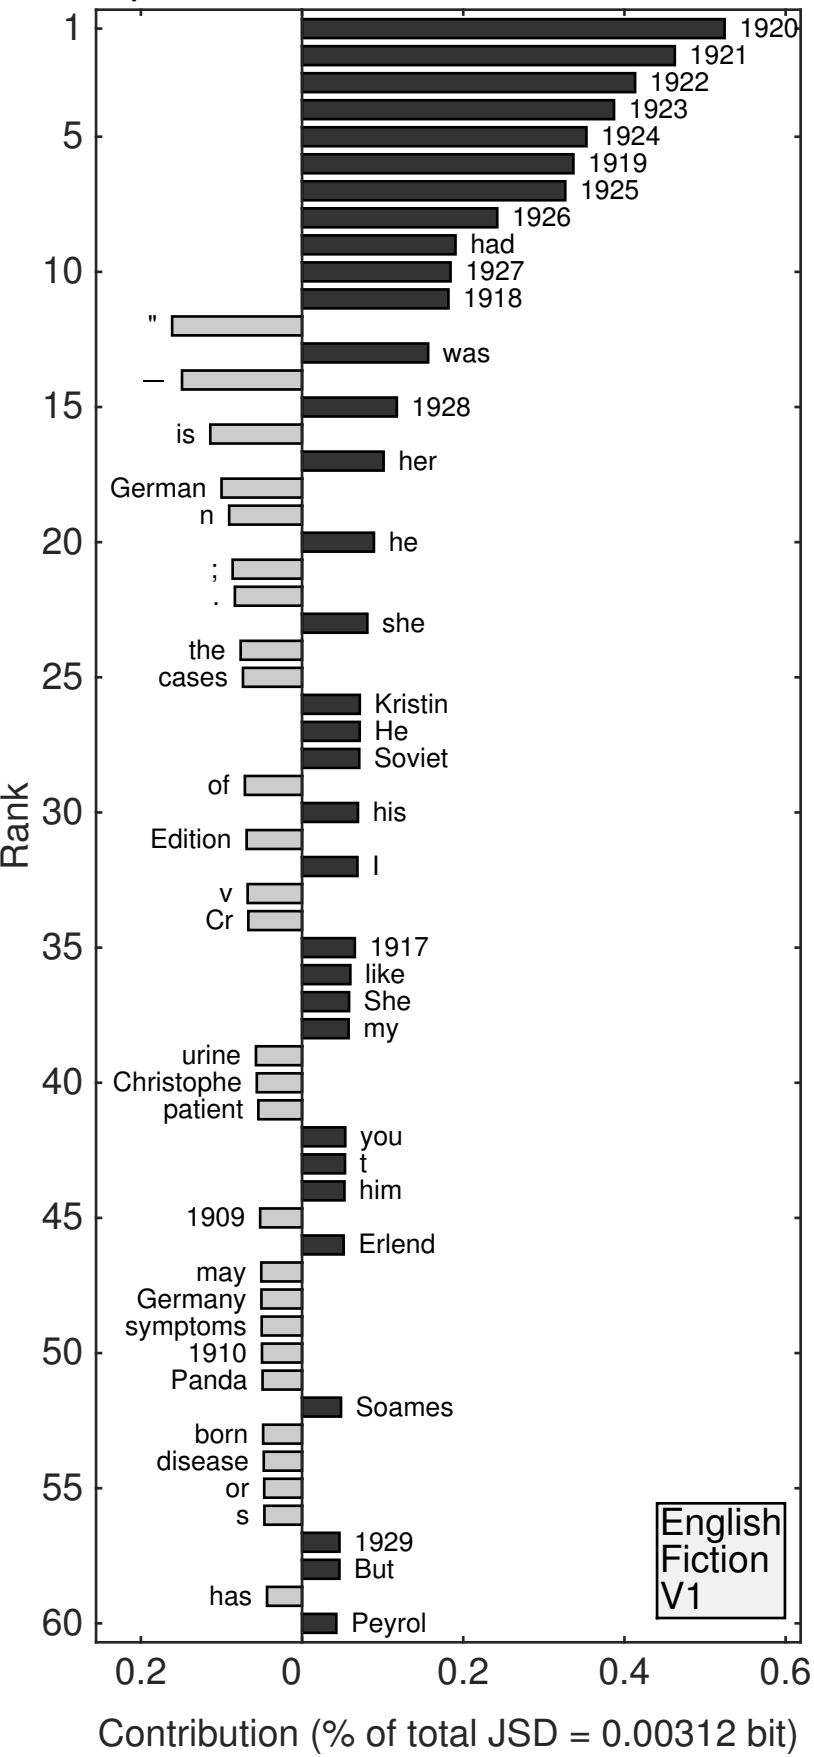

# Top JSD contributions: 1910s to 1930s

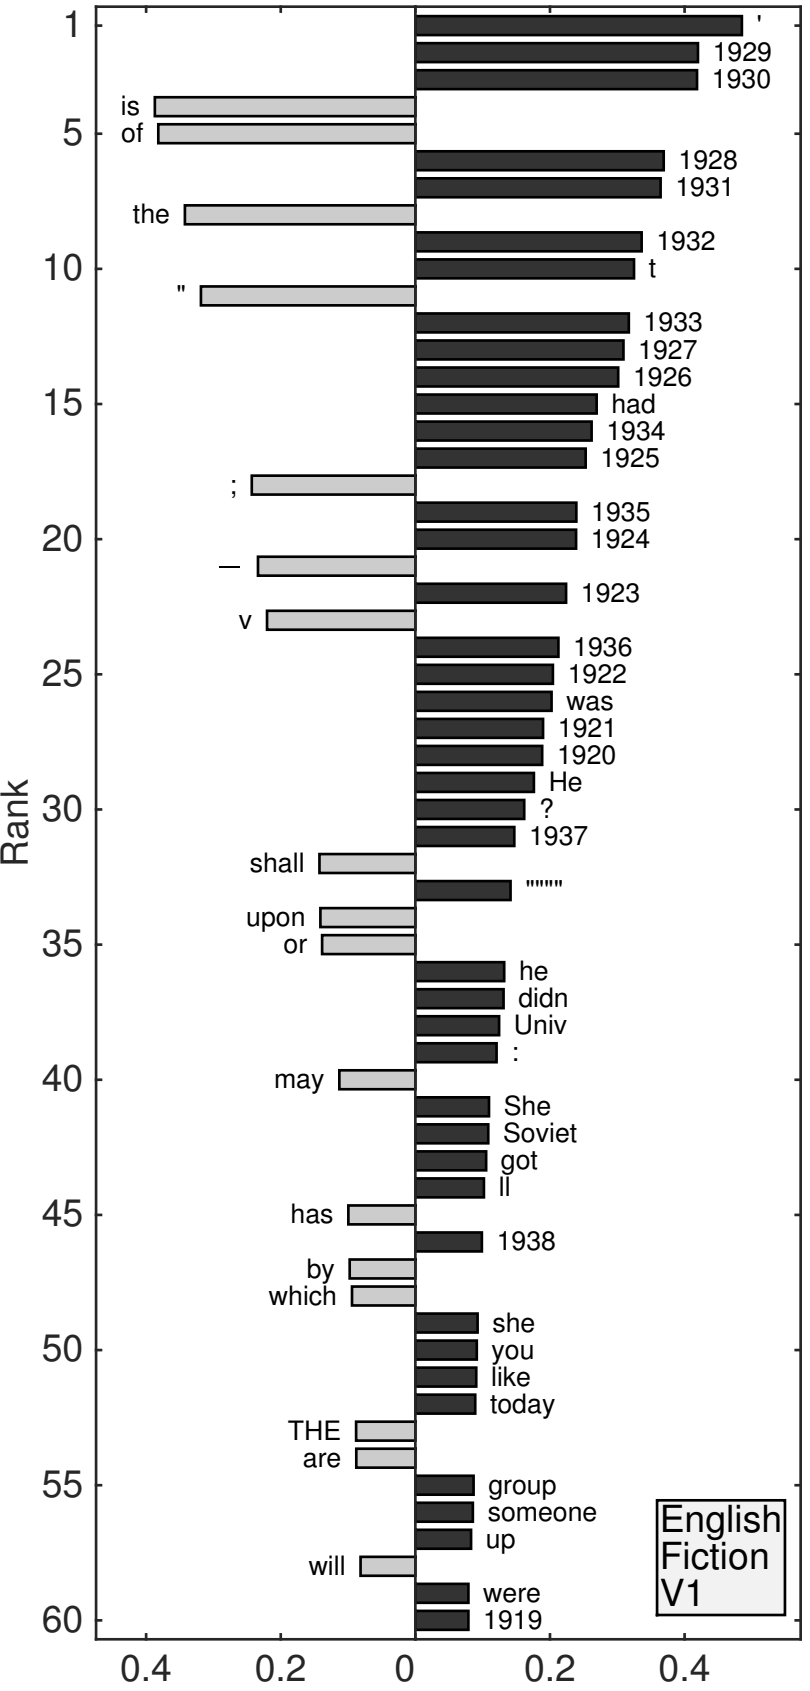

English Fiction V1

Contribution (% of total JSD = 0.00611 bit)

# Top JSD contributions: 1910s to 1940s

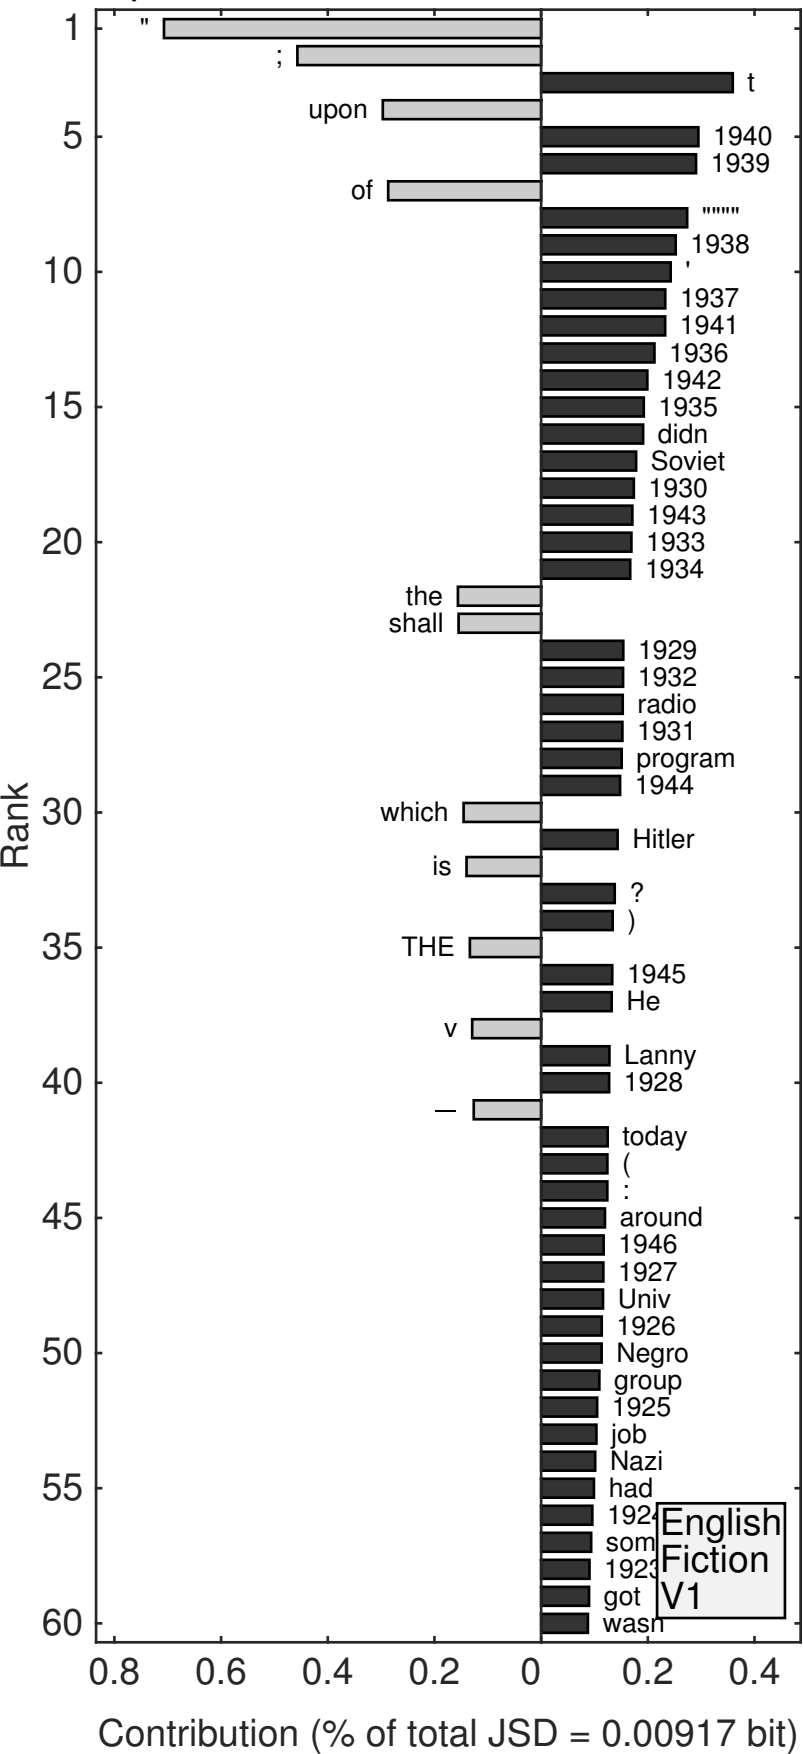

# Top JSD contributions: 1910s to 1950s

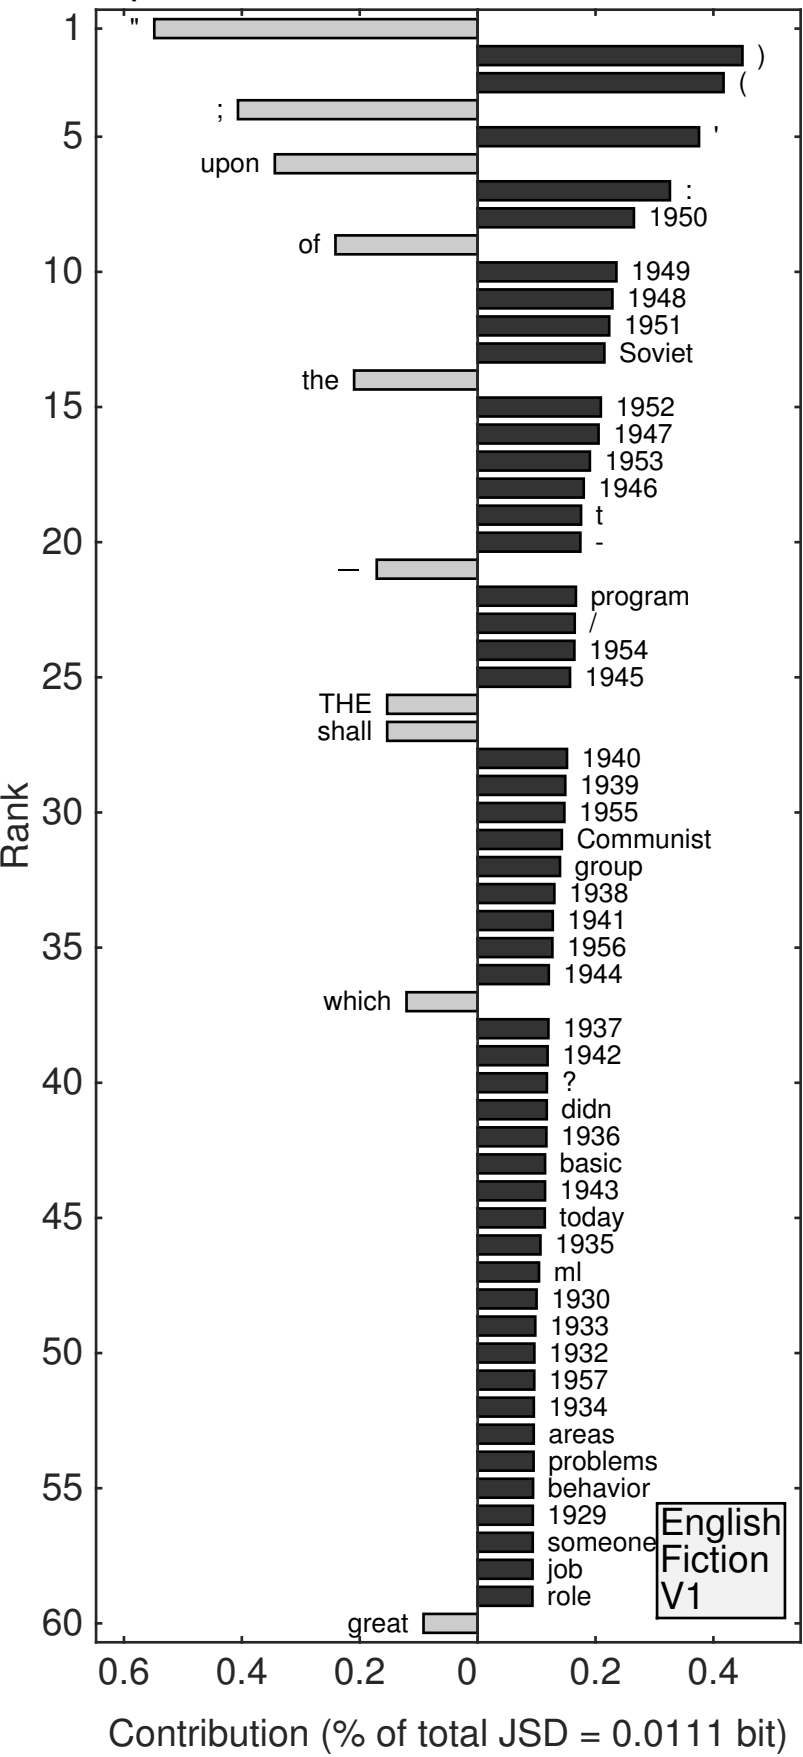

# Top JSD contributions: 1910s to 1960s

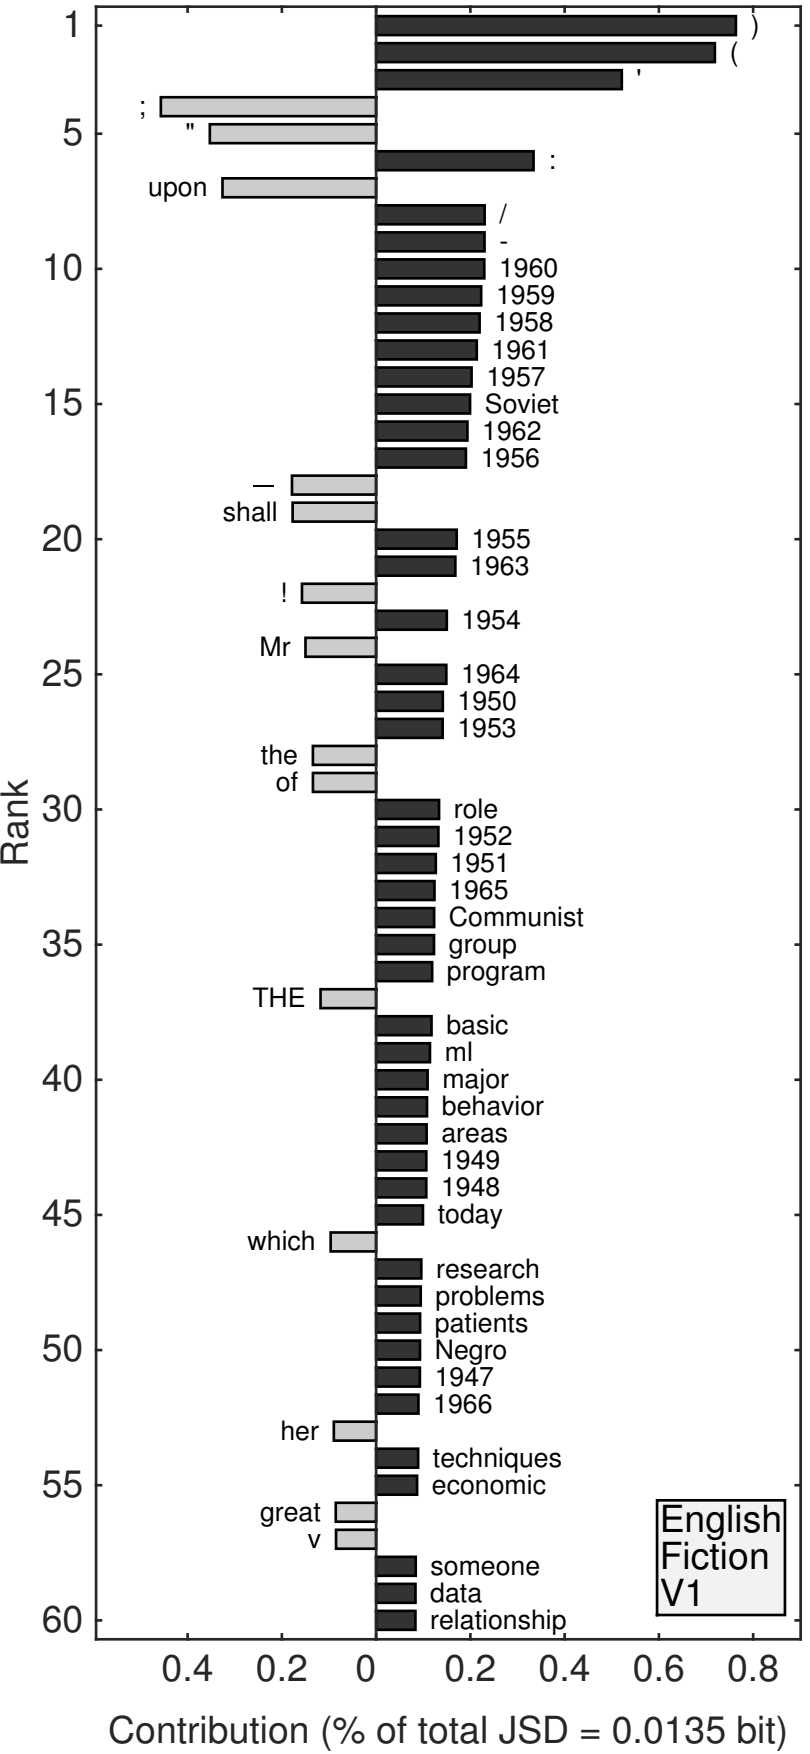

English Fiction V1

# Top JSD contributions: 1910s to 1970s

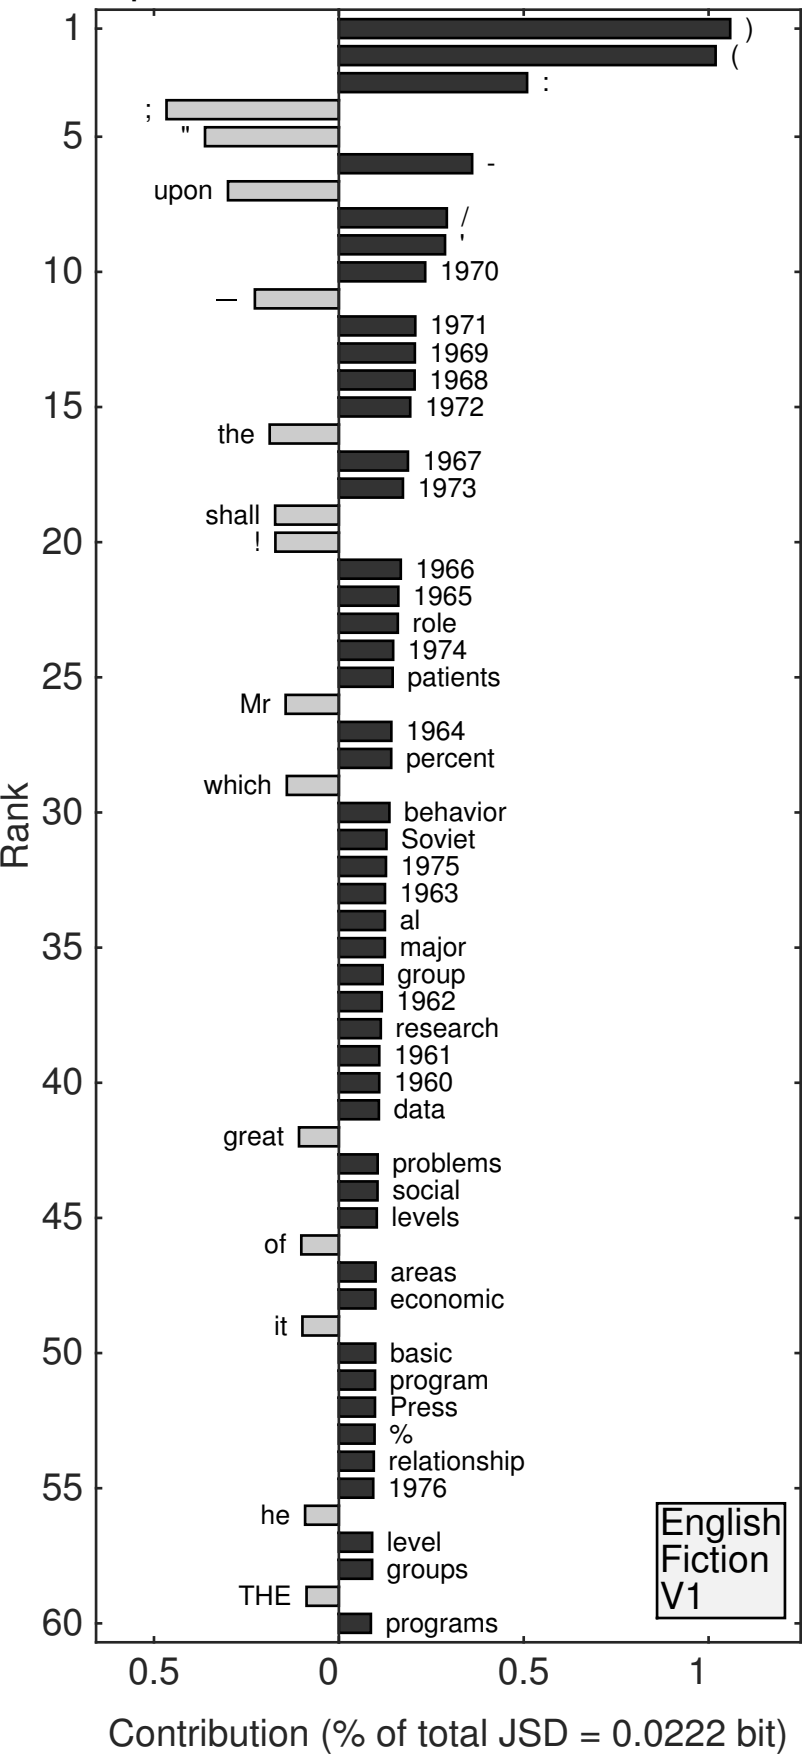



# Top JSD contributions: 1910s to 1980s

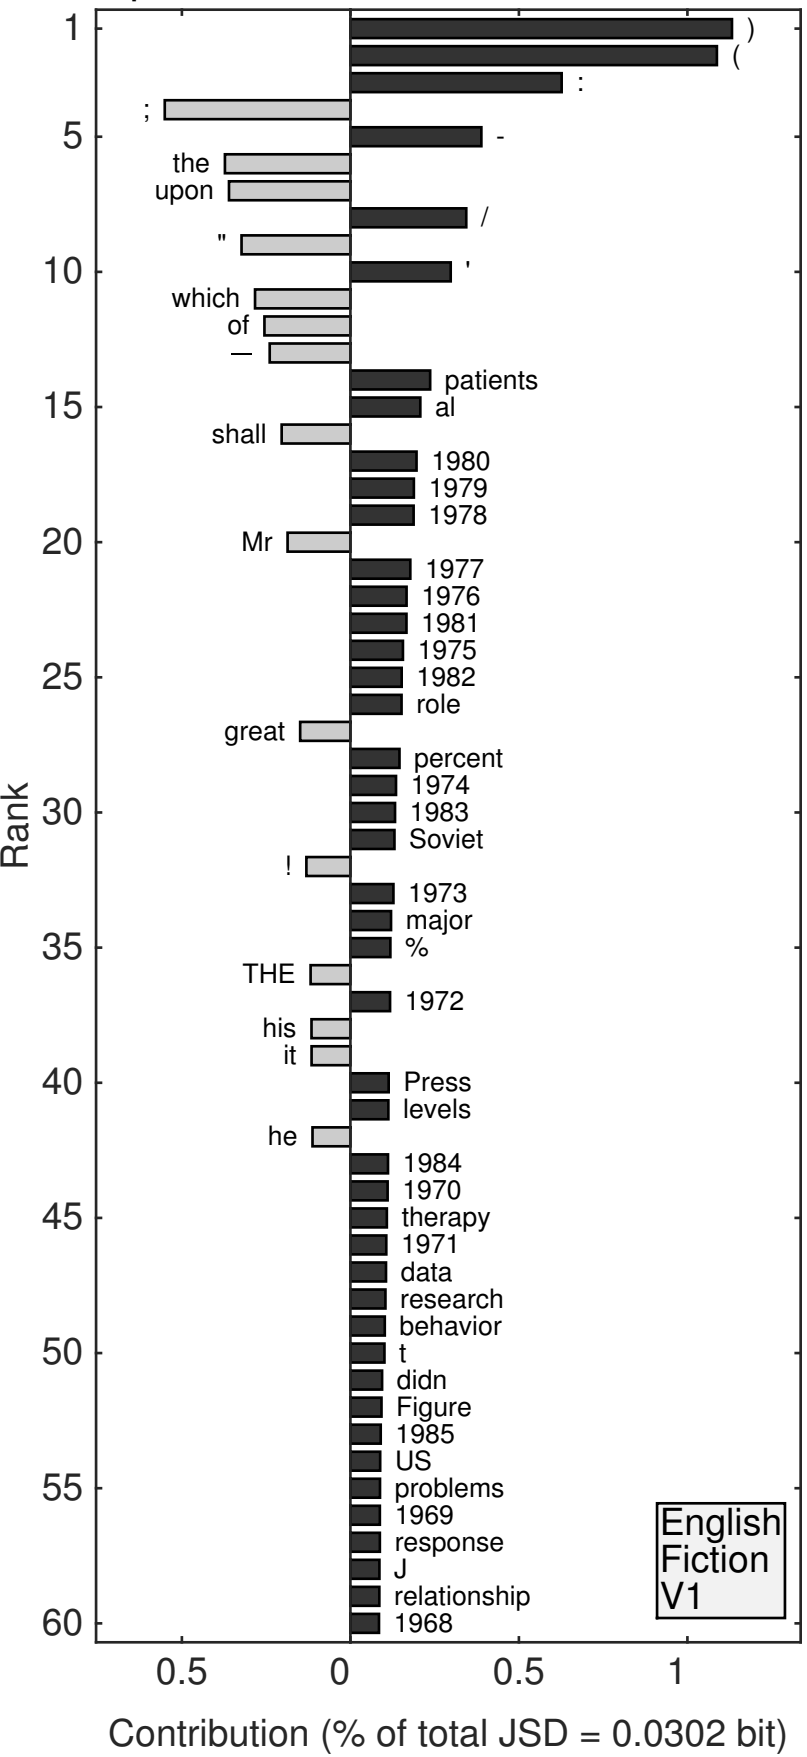

# Top JSD contributions: 1910s to 1990s

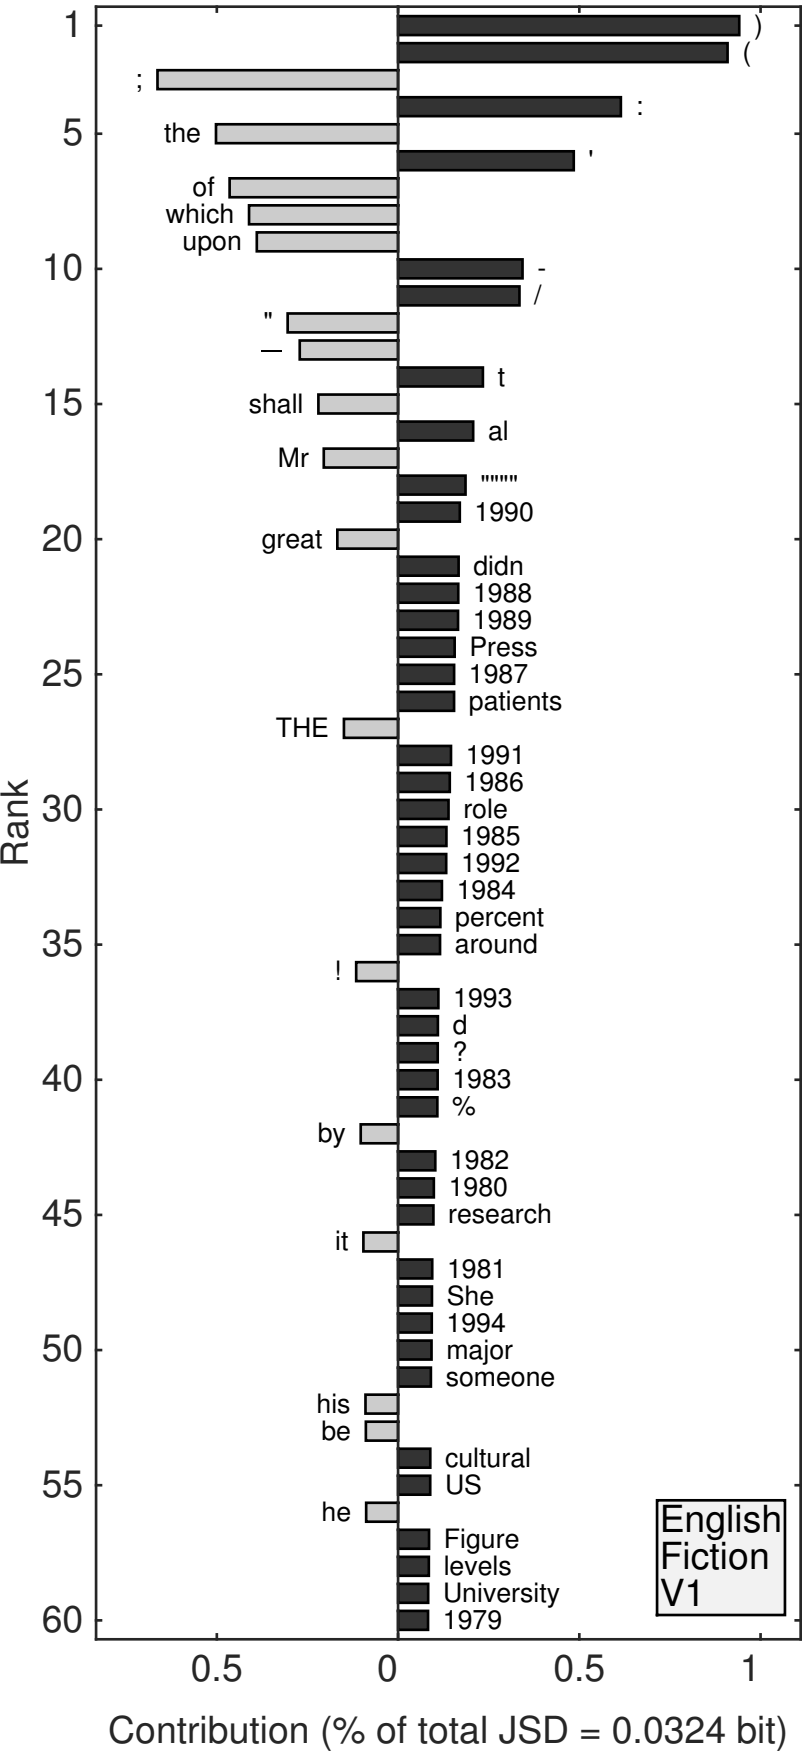

English Fiction V1

# Top JSD contributions: 1920s to 1930s

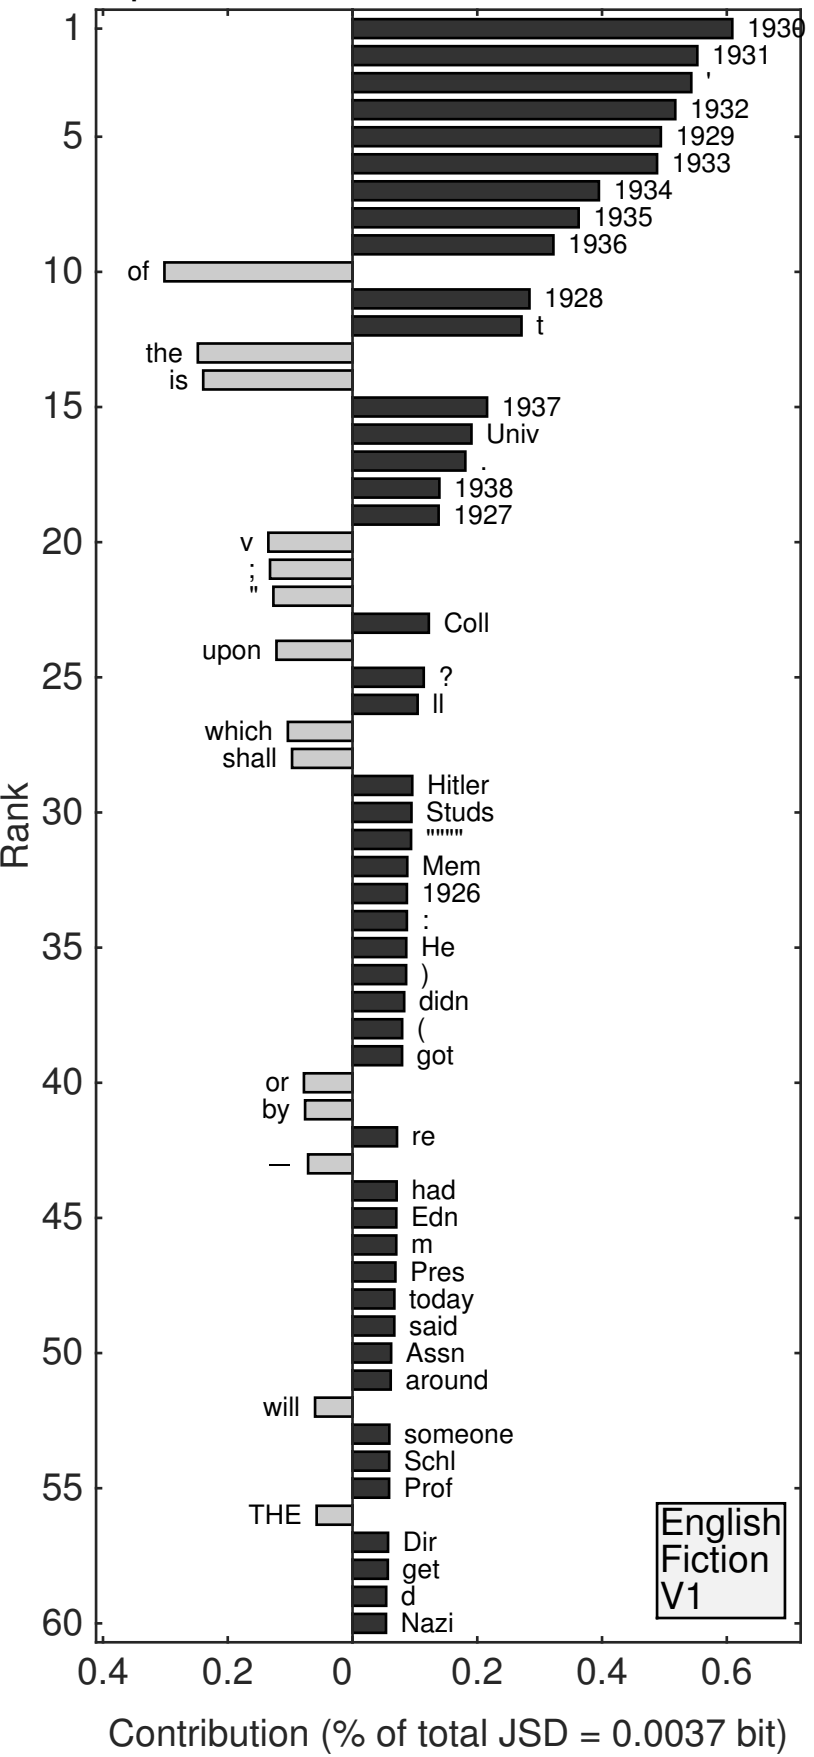

English Fiction V1

# Top JSD contributions: 1920s to 1940s

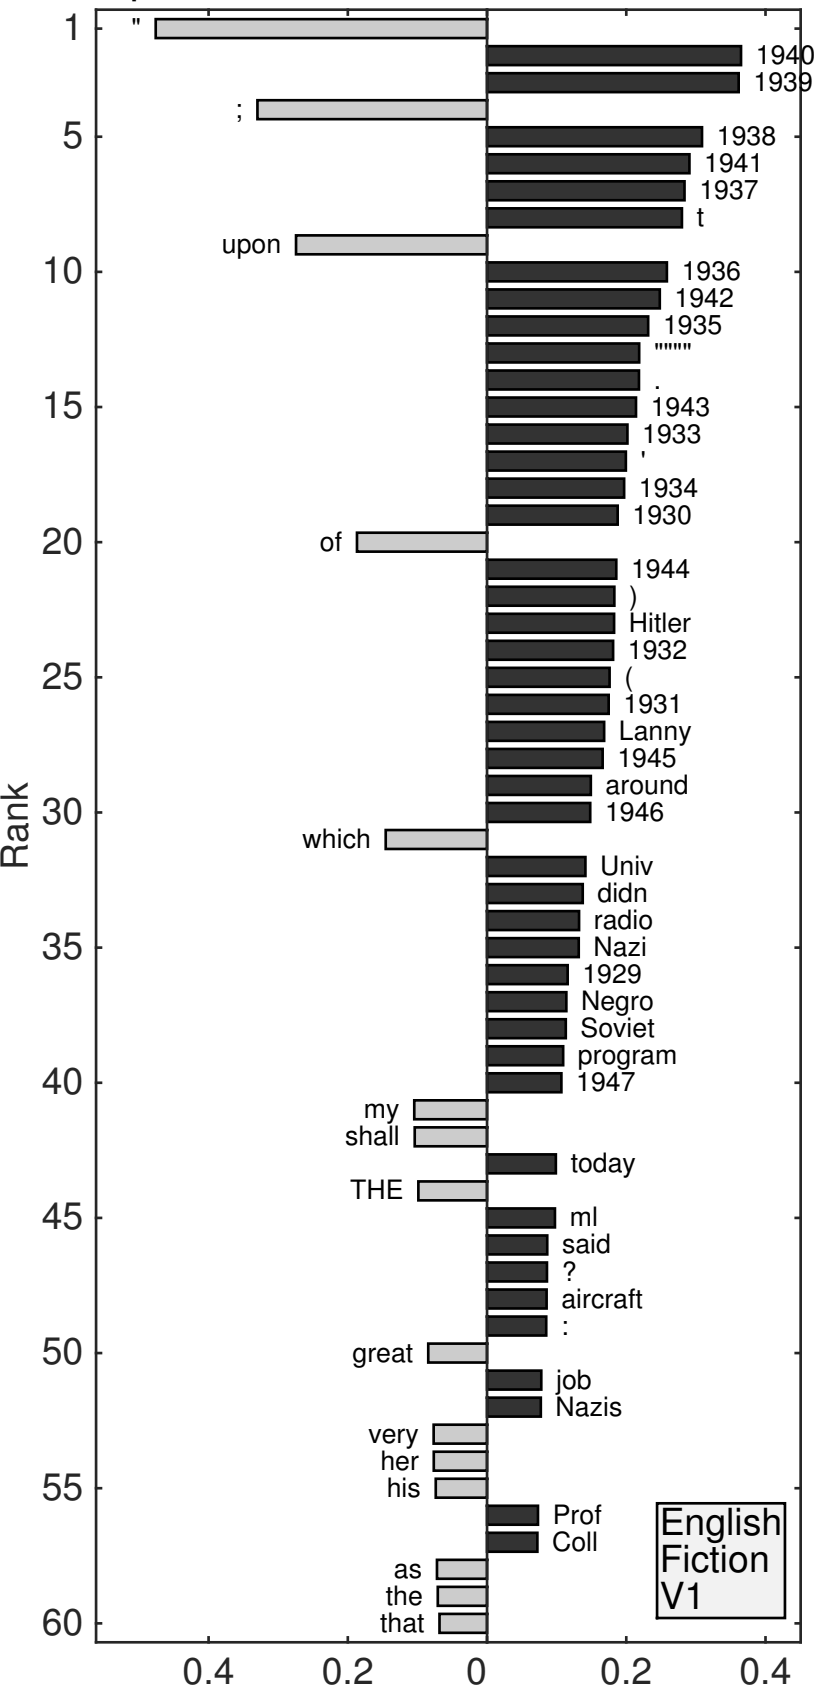

# Top JSD contributions: 1920s to 1950s

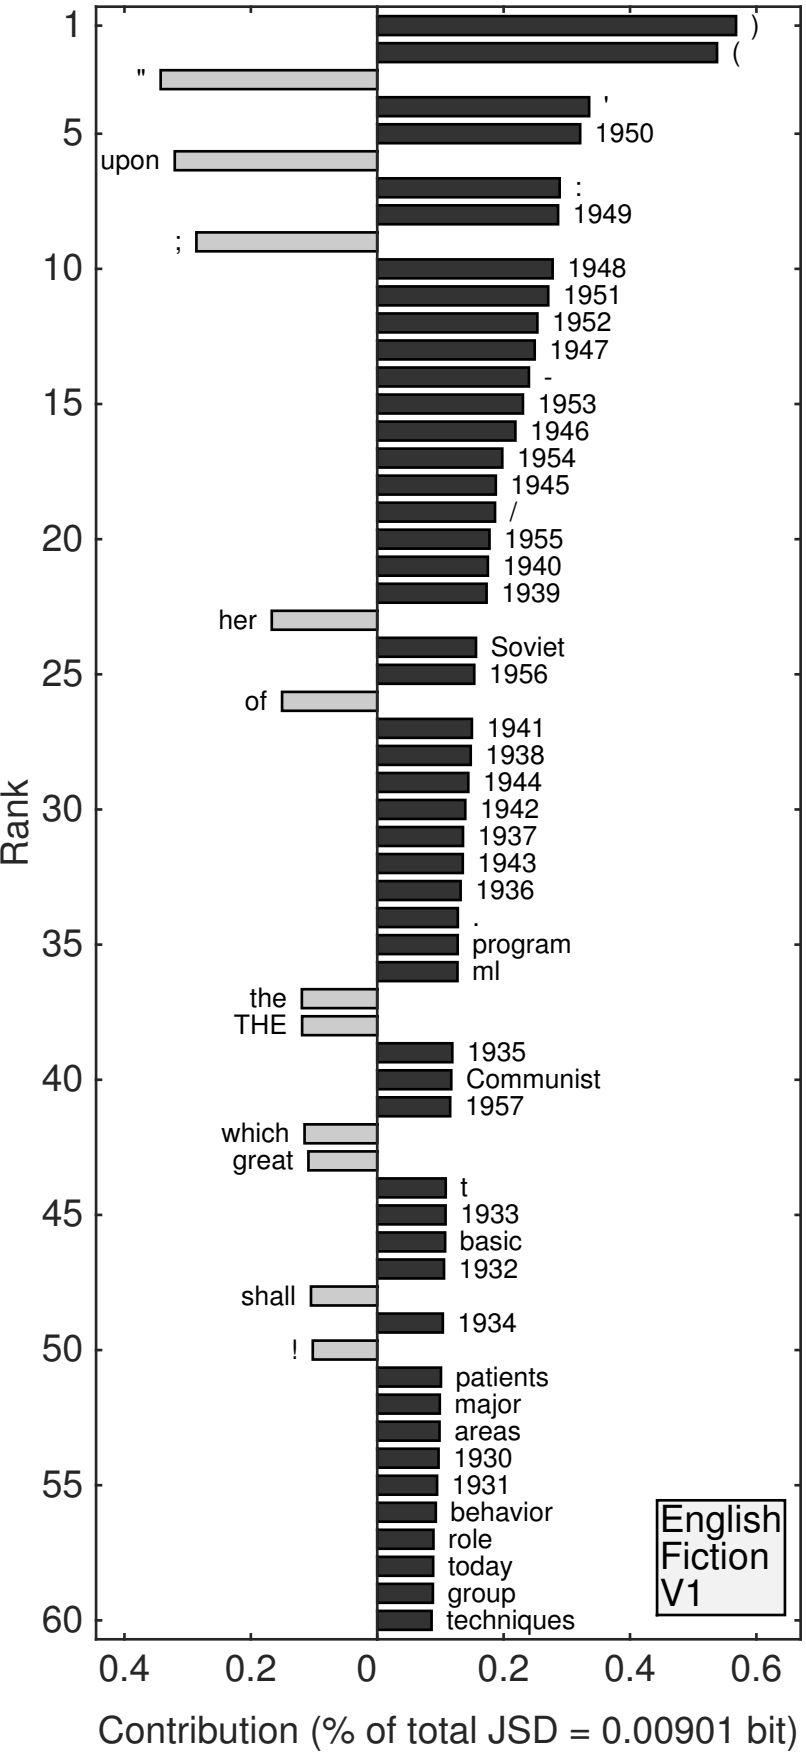

# Top JSD contributions: 1920s to 1960s

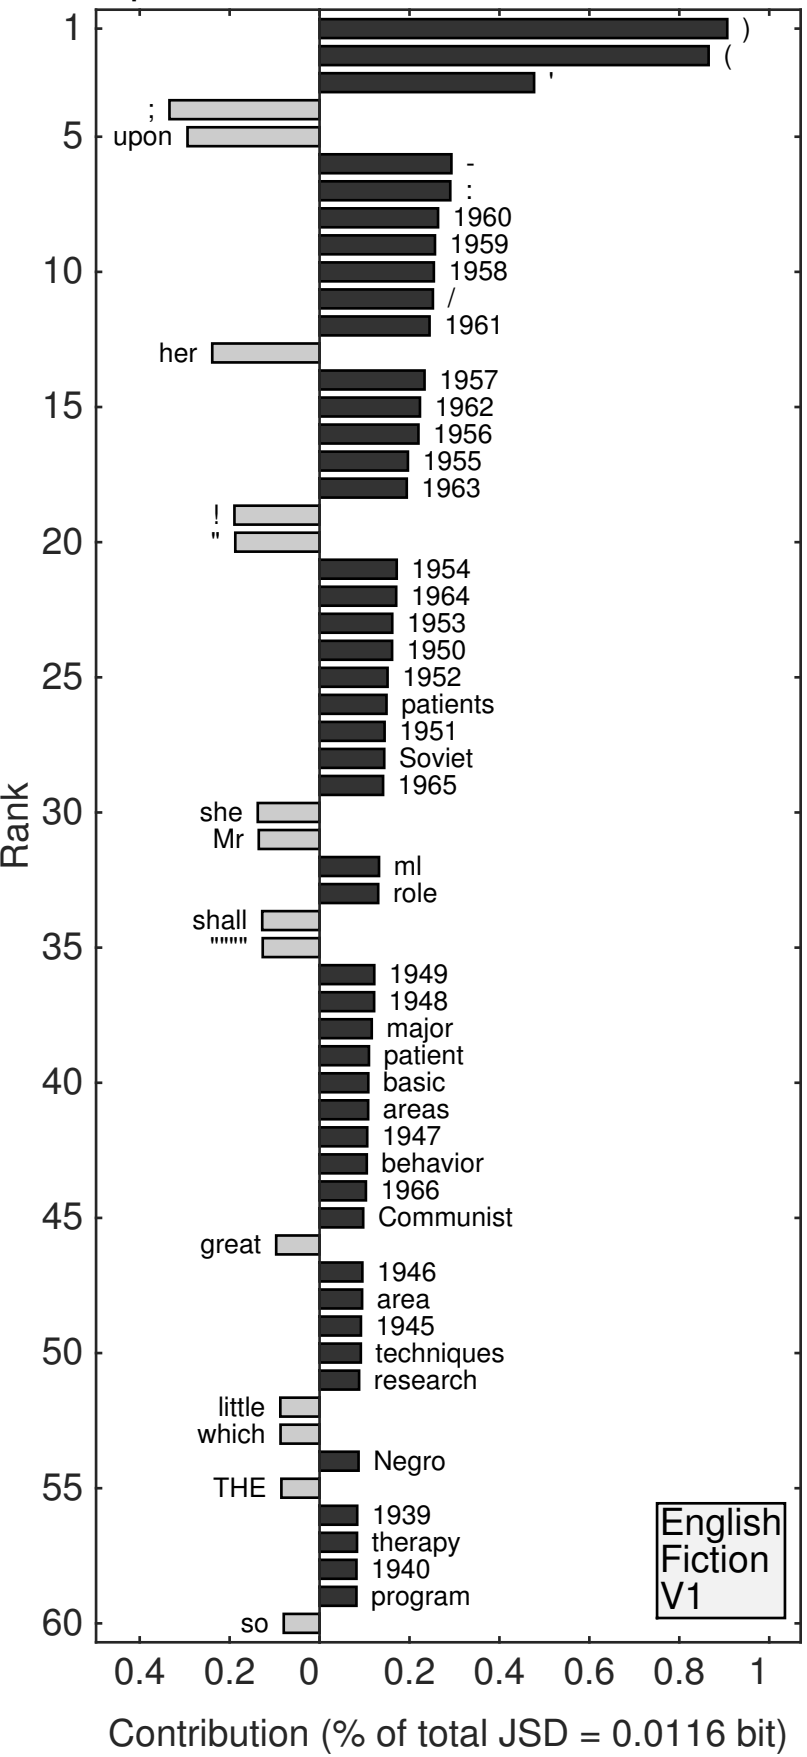

# Top JSD contributions: 1920s to 1970s

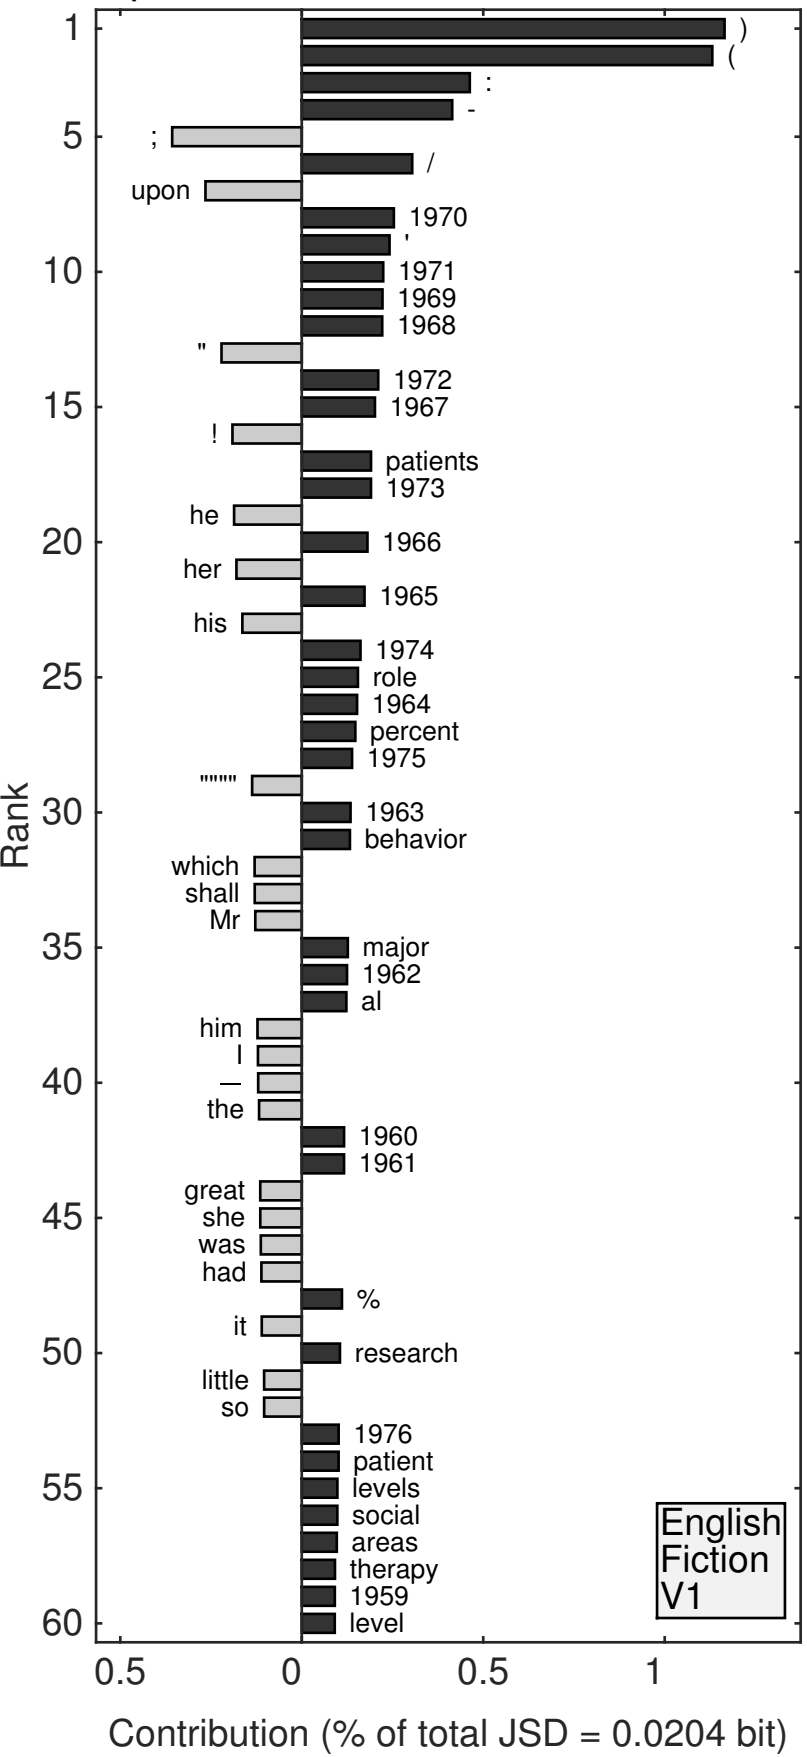

English Fiction V1

# Top JSD contributions: 1920s to 1980s

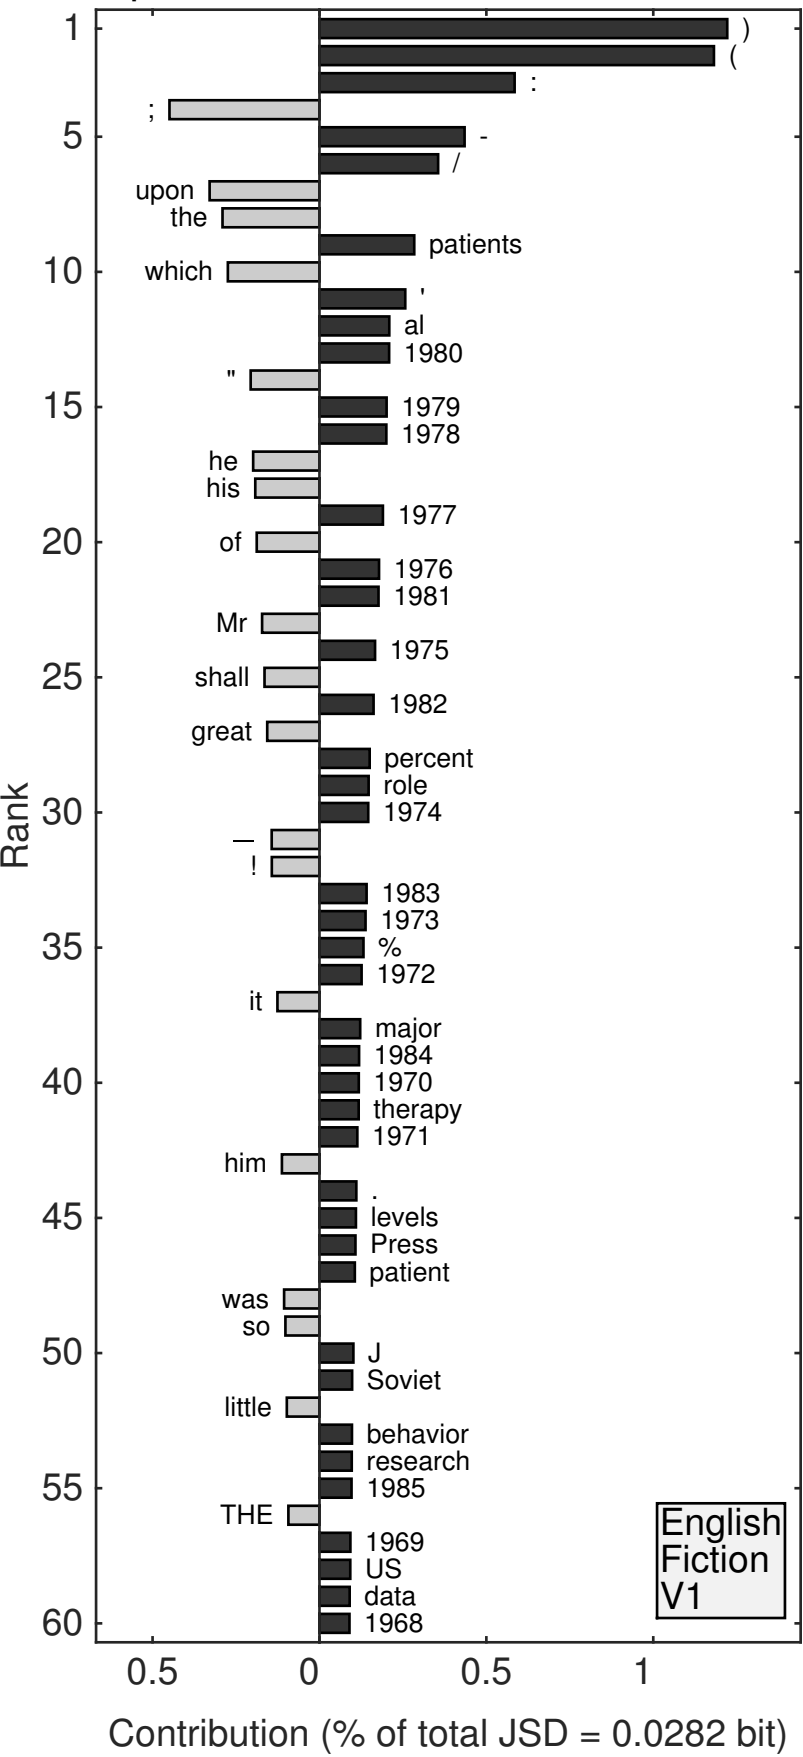



# Top JSD contributions: 1920s to 1990s

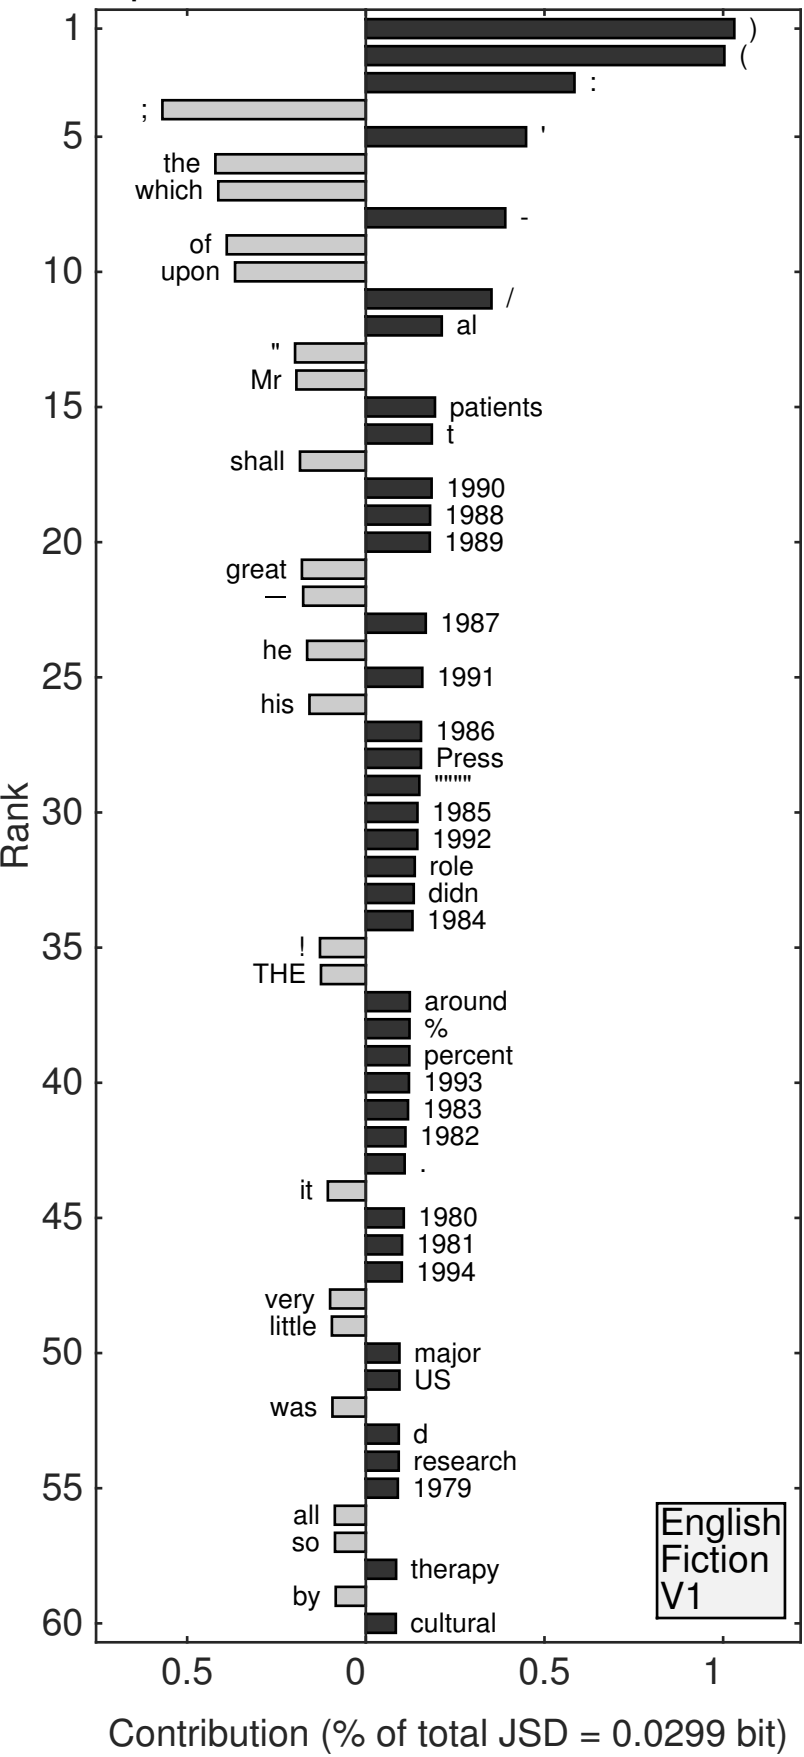

English Fiction V1

# Top JSD contributions: 1930s to 1940s

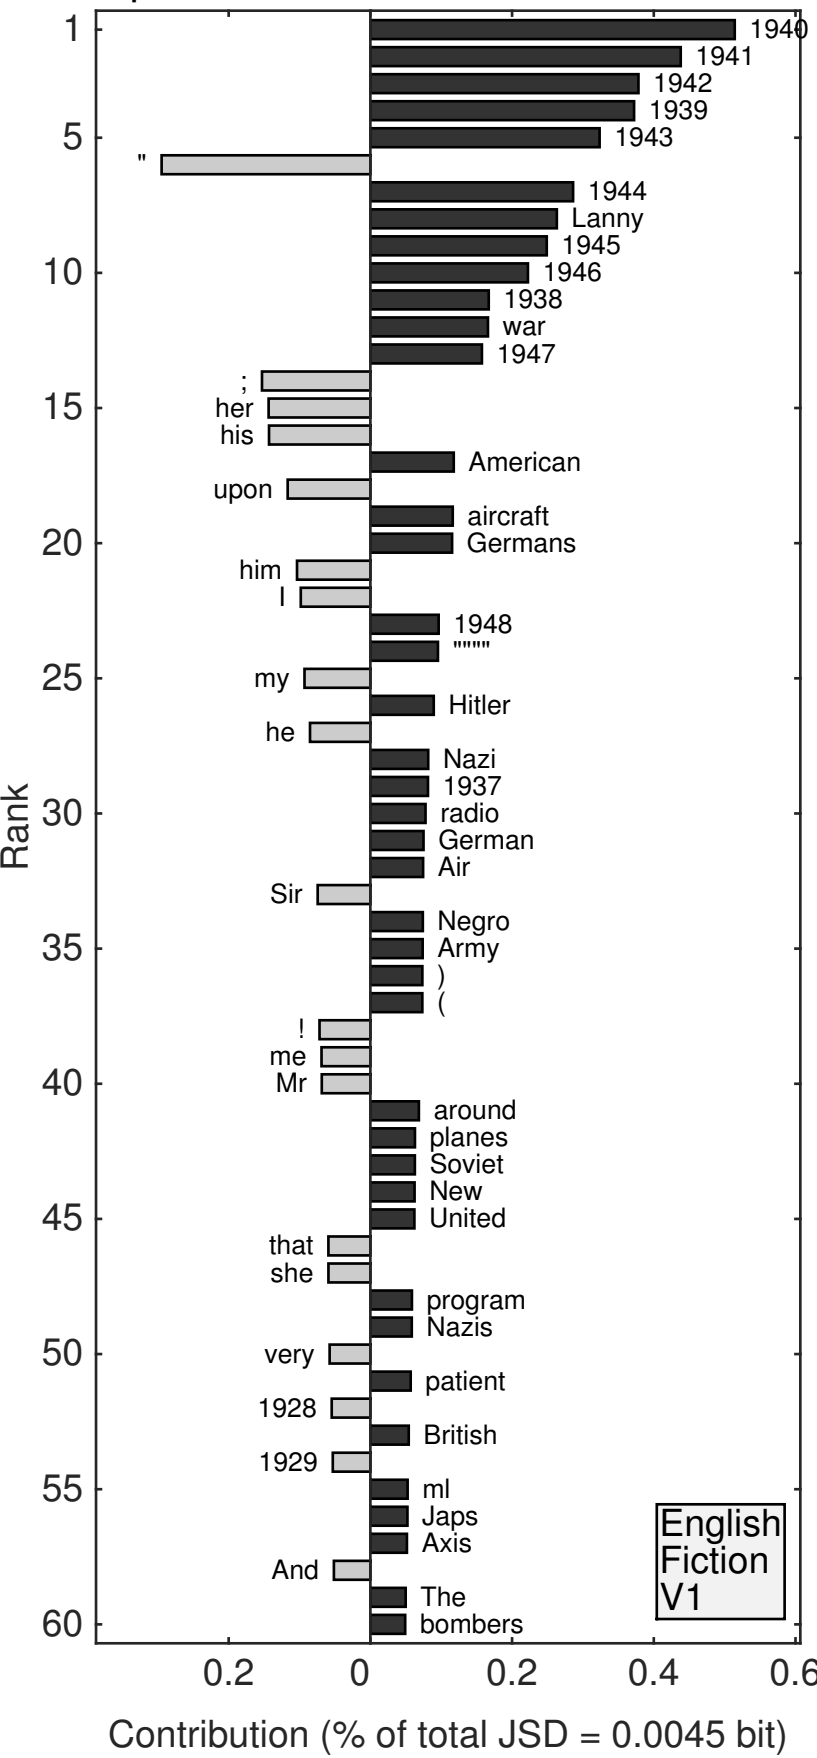

# Top JSD contributions: 1930s to 1950s

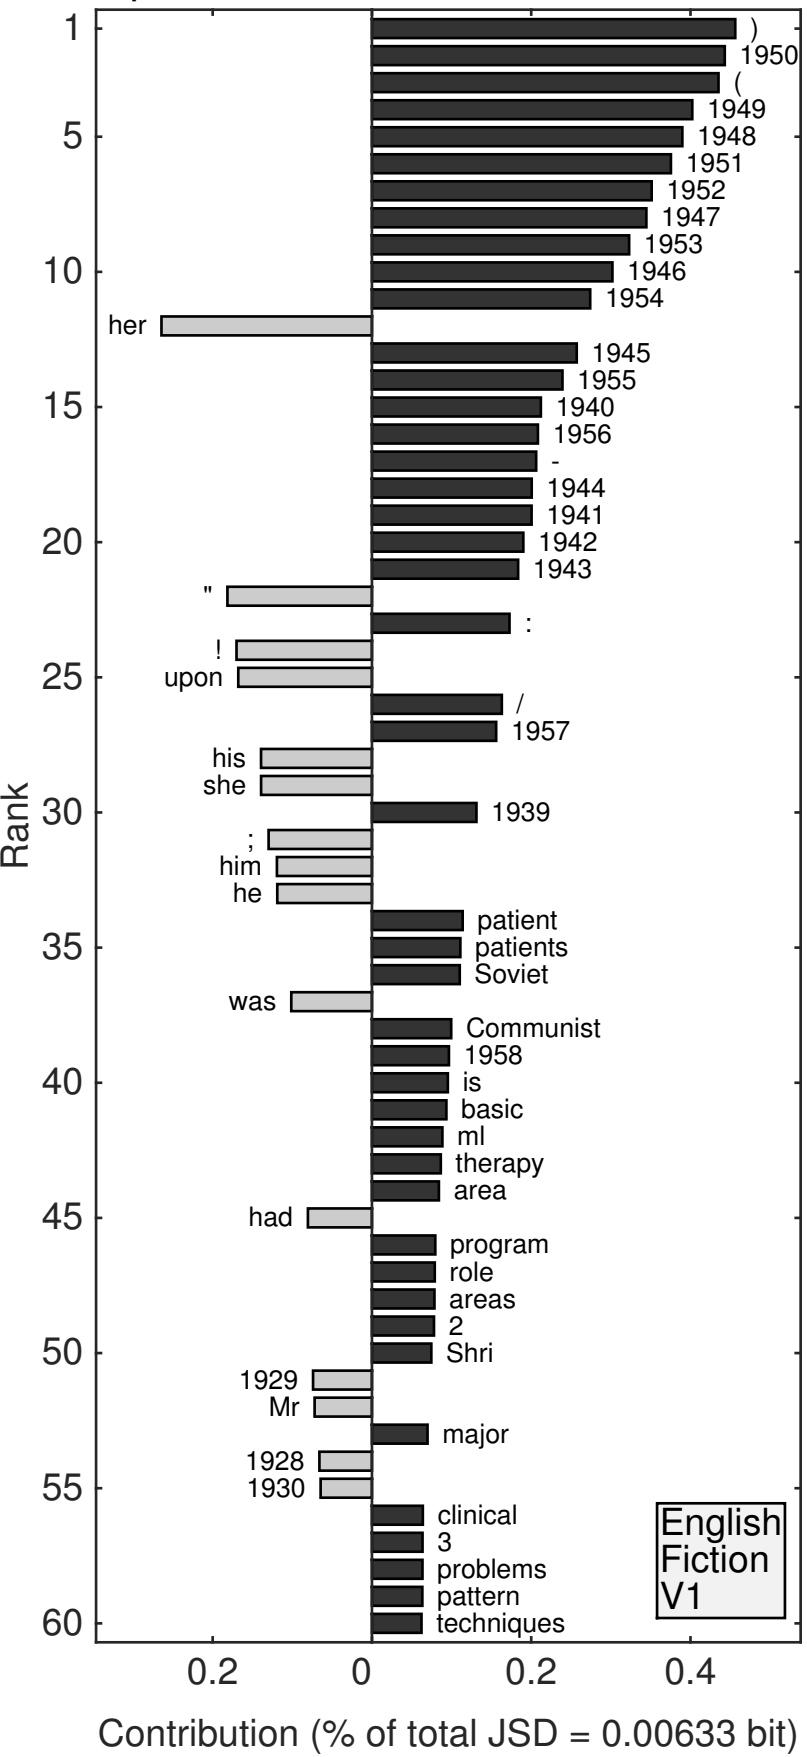

# Top JSD contributions: 1930s to 1960s

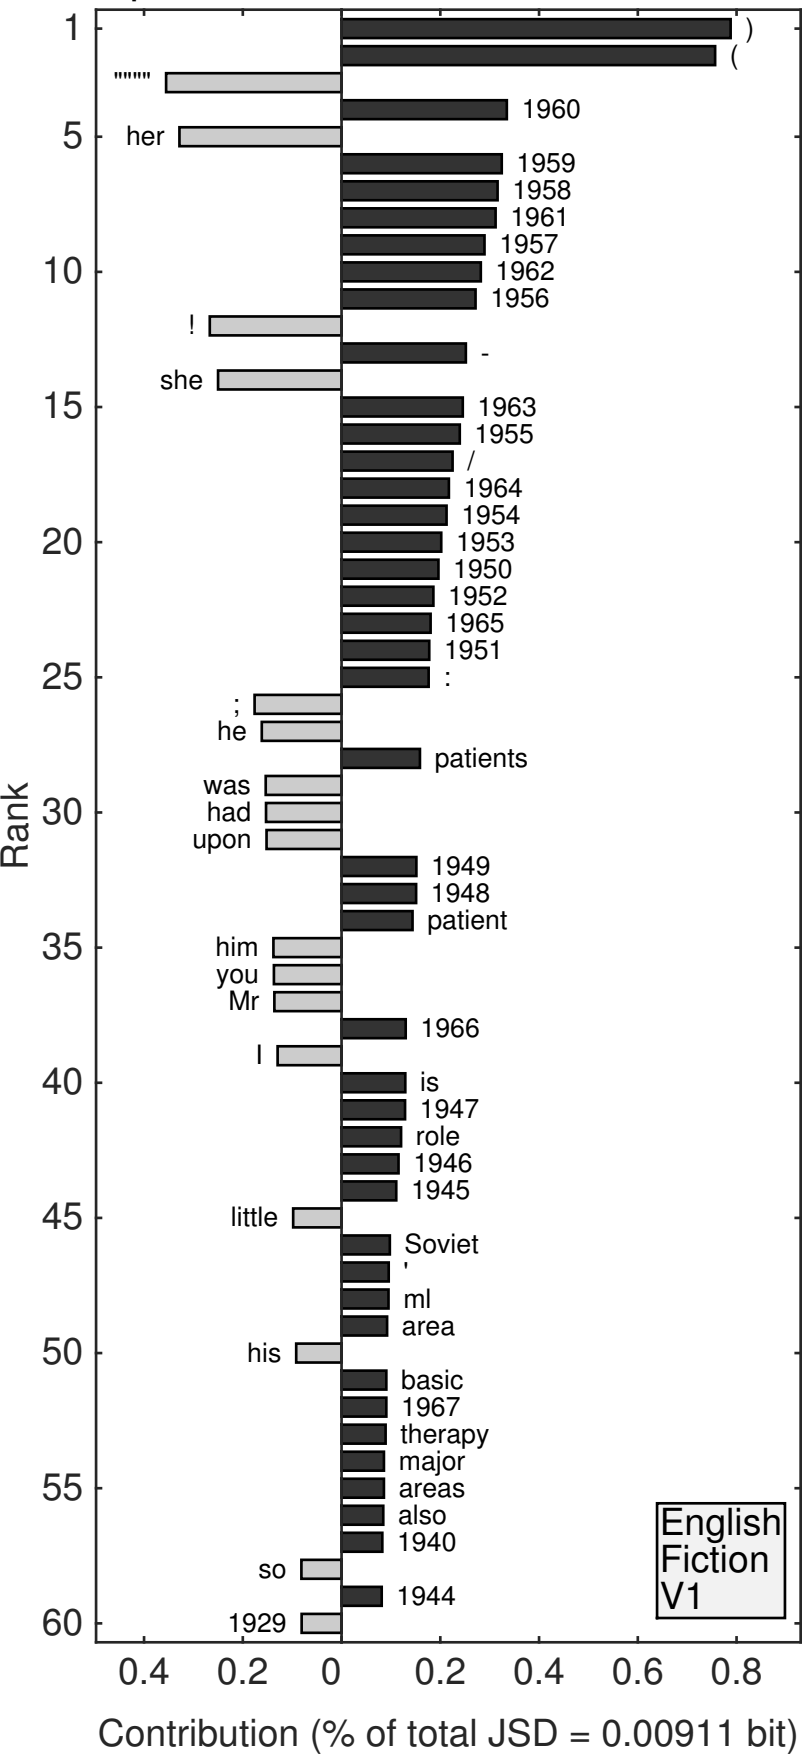

# Top JSD contributions: 1930s to 1970s

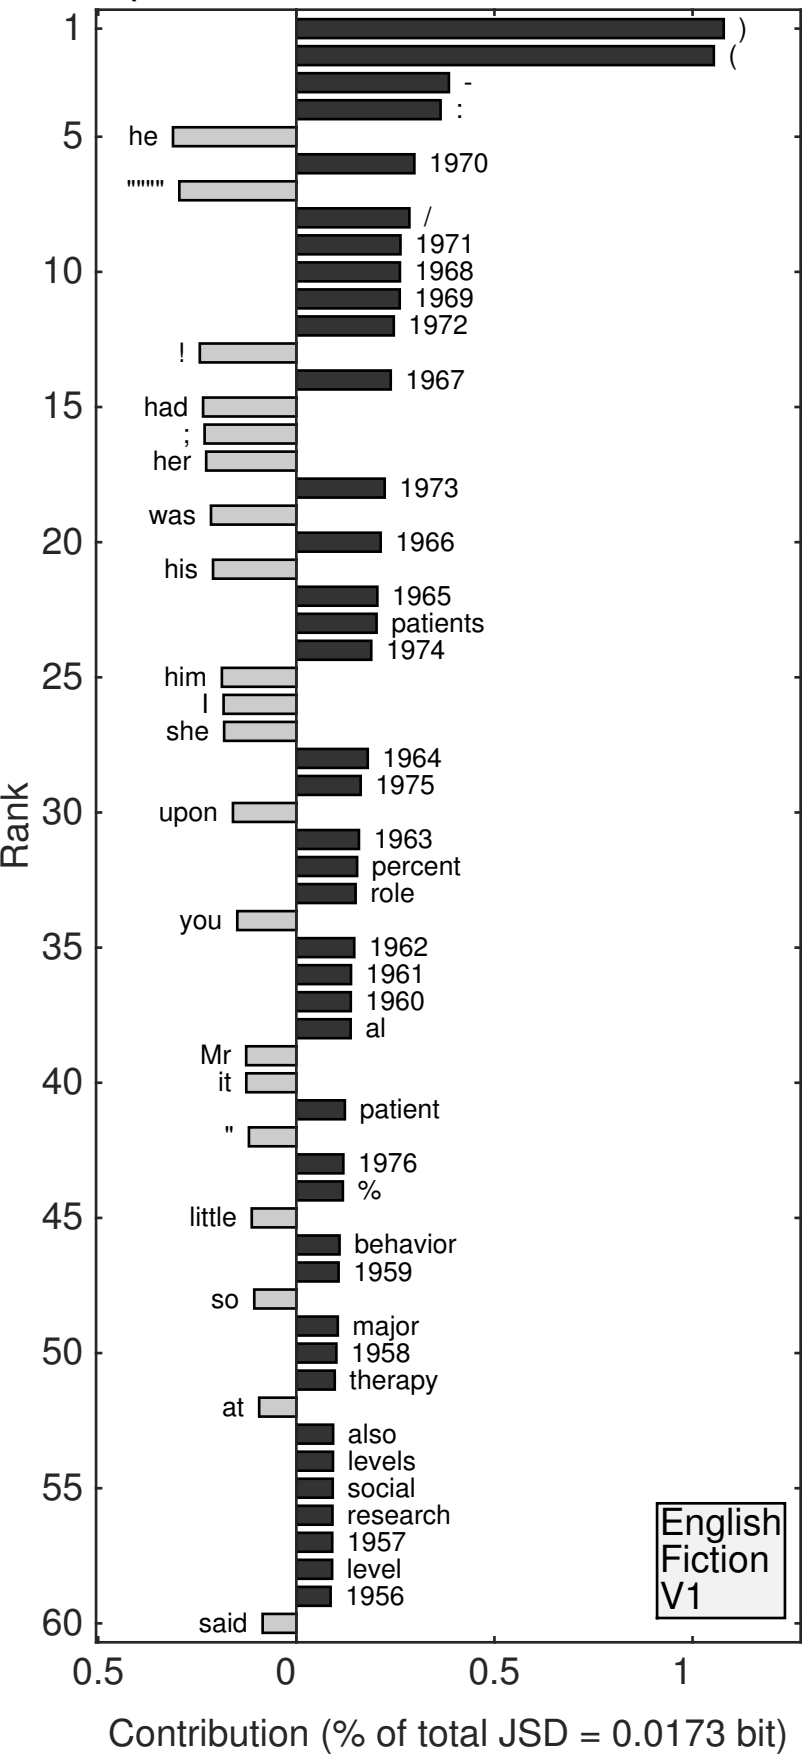

# Top JSD contributions: 1930s to 1980s

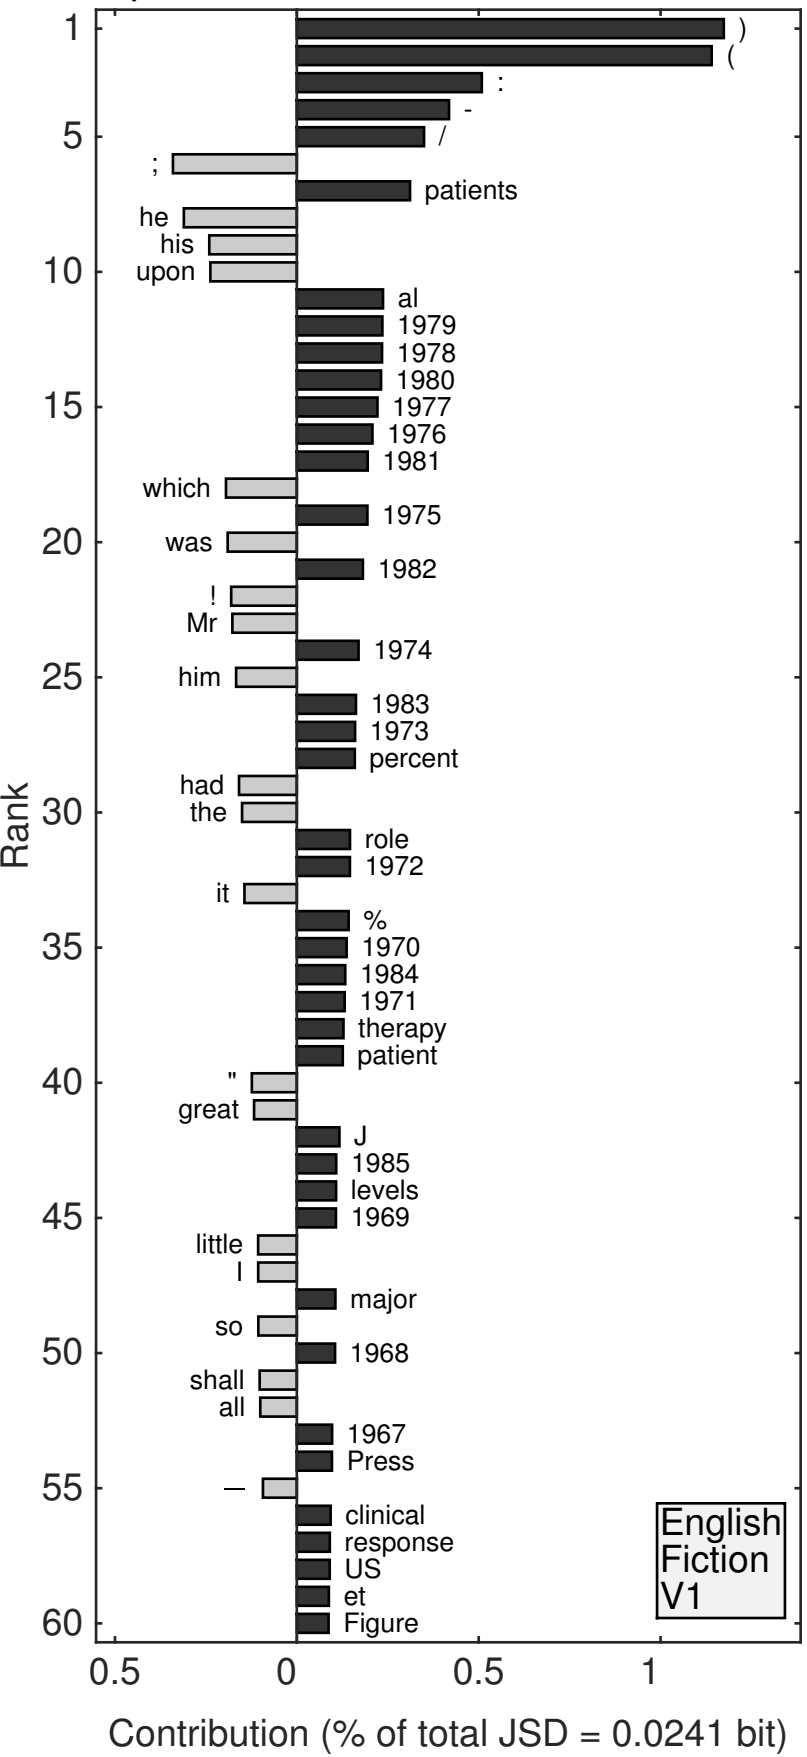

English  
Fiction  
V1

# Top JSD contributions: 1930s to 1990s

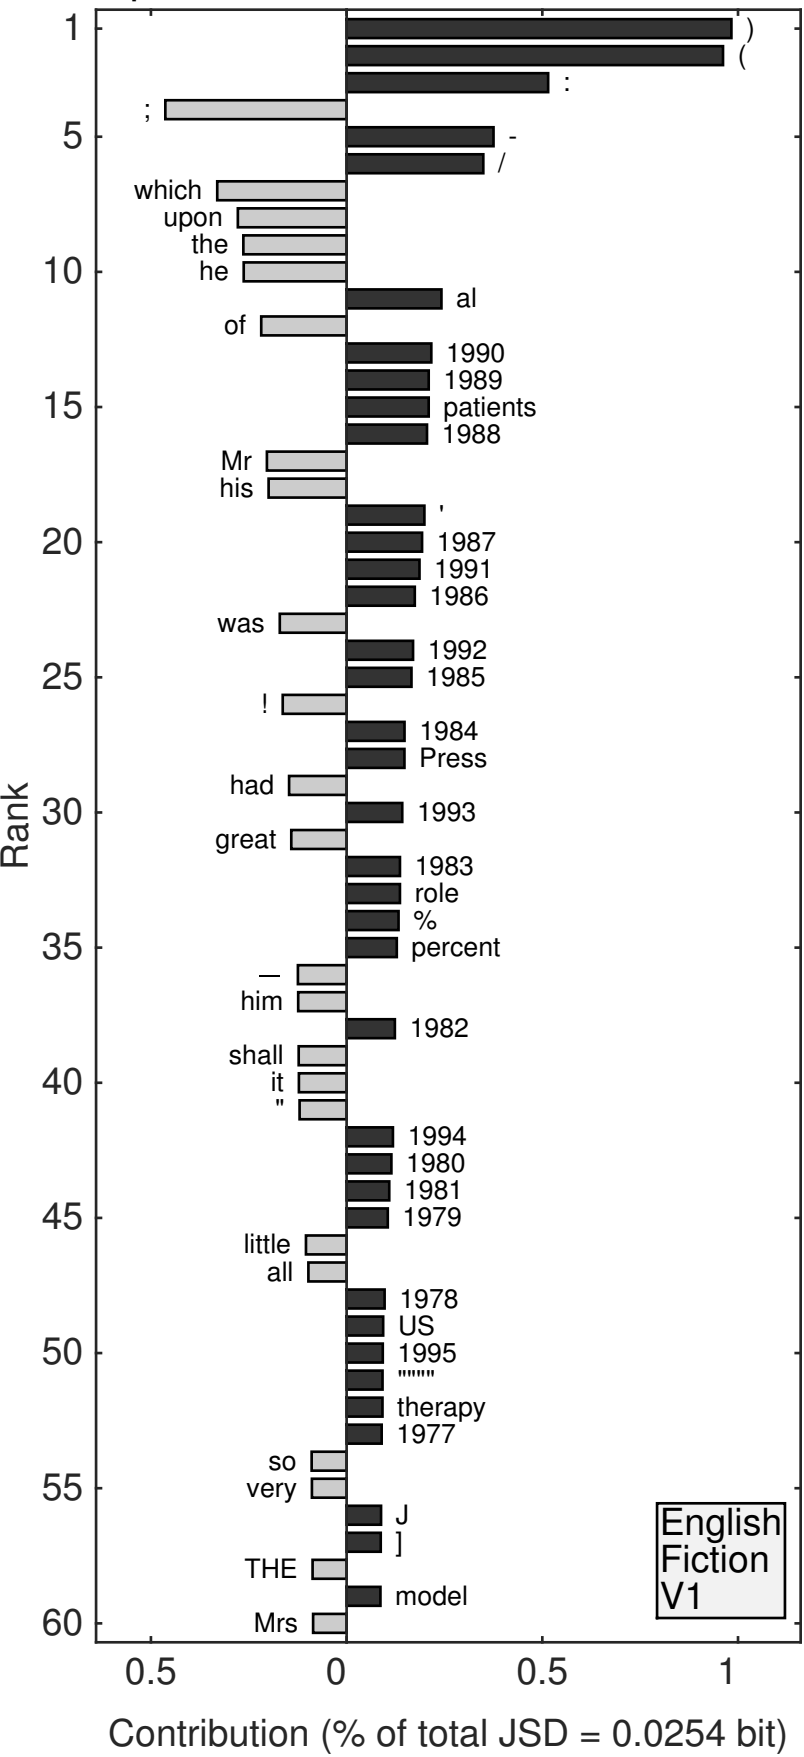

English Fiction V1

# Top JSD contributions: 1940s to 1950s

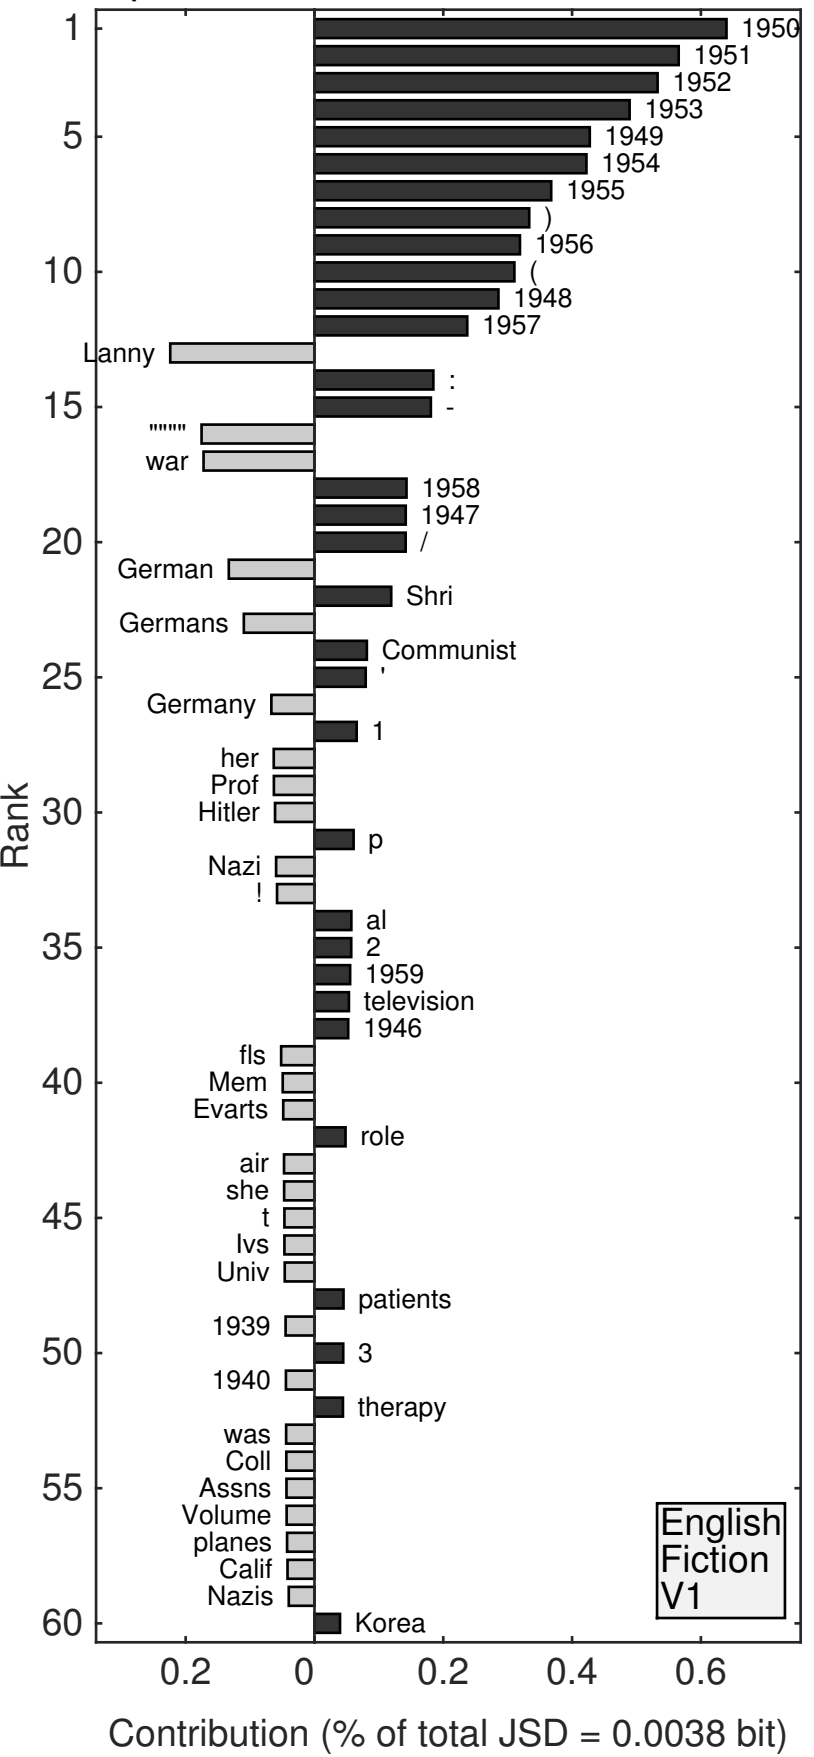



# Top JSD contributions: 1940s to 1960s

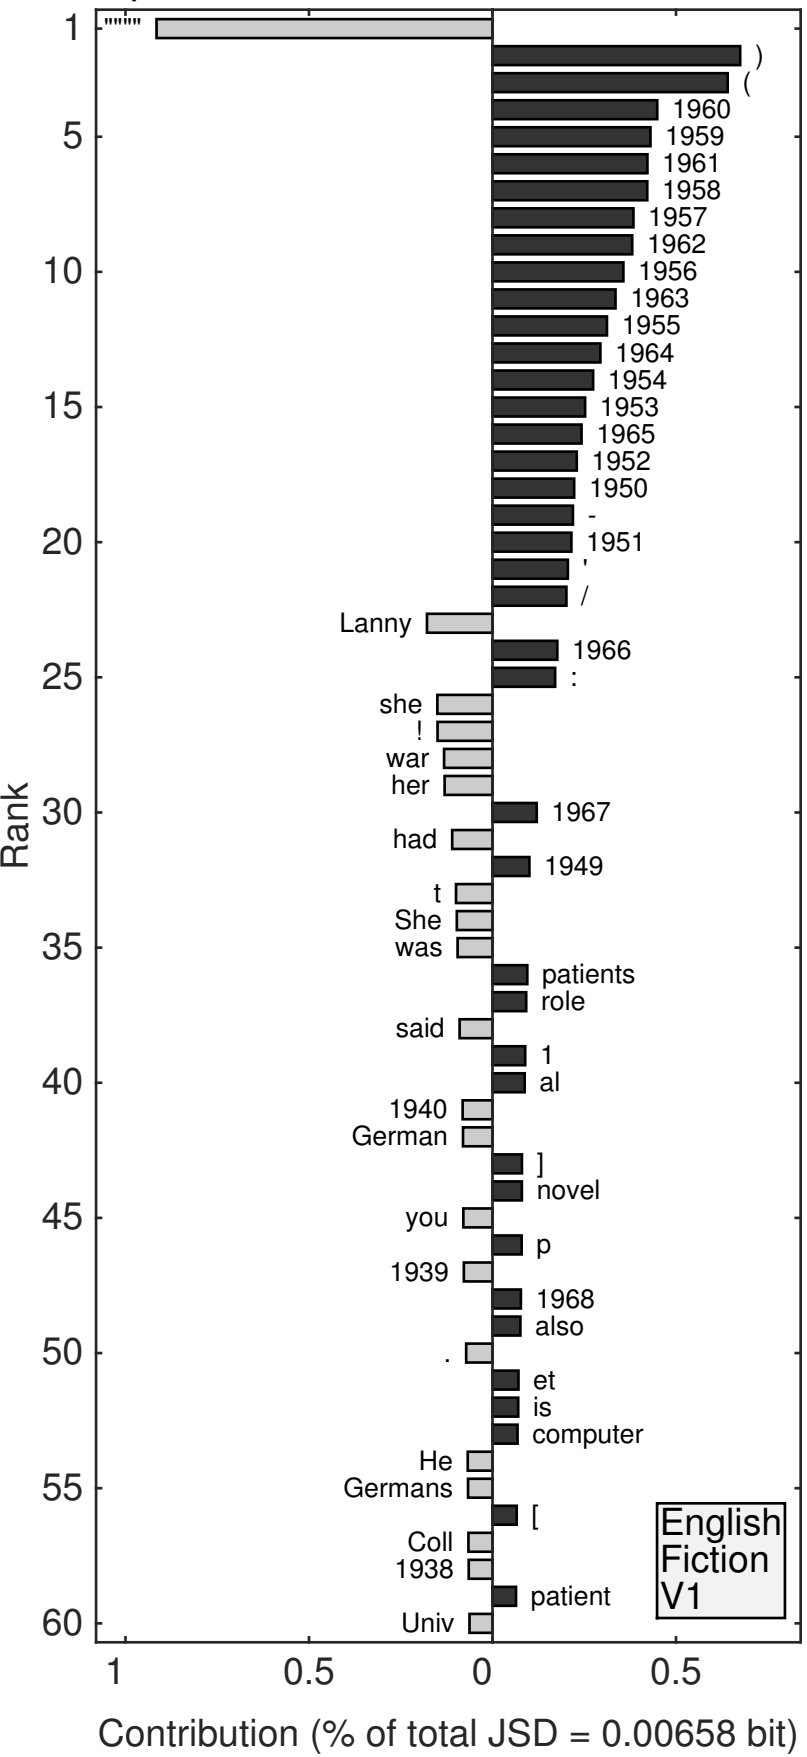

# Top JSD contributions: 1940s to 1970s

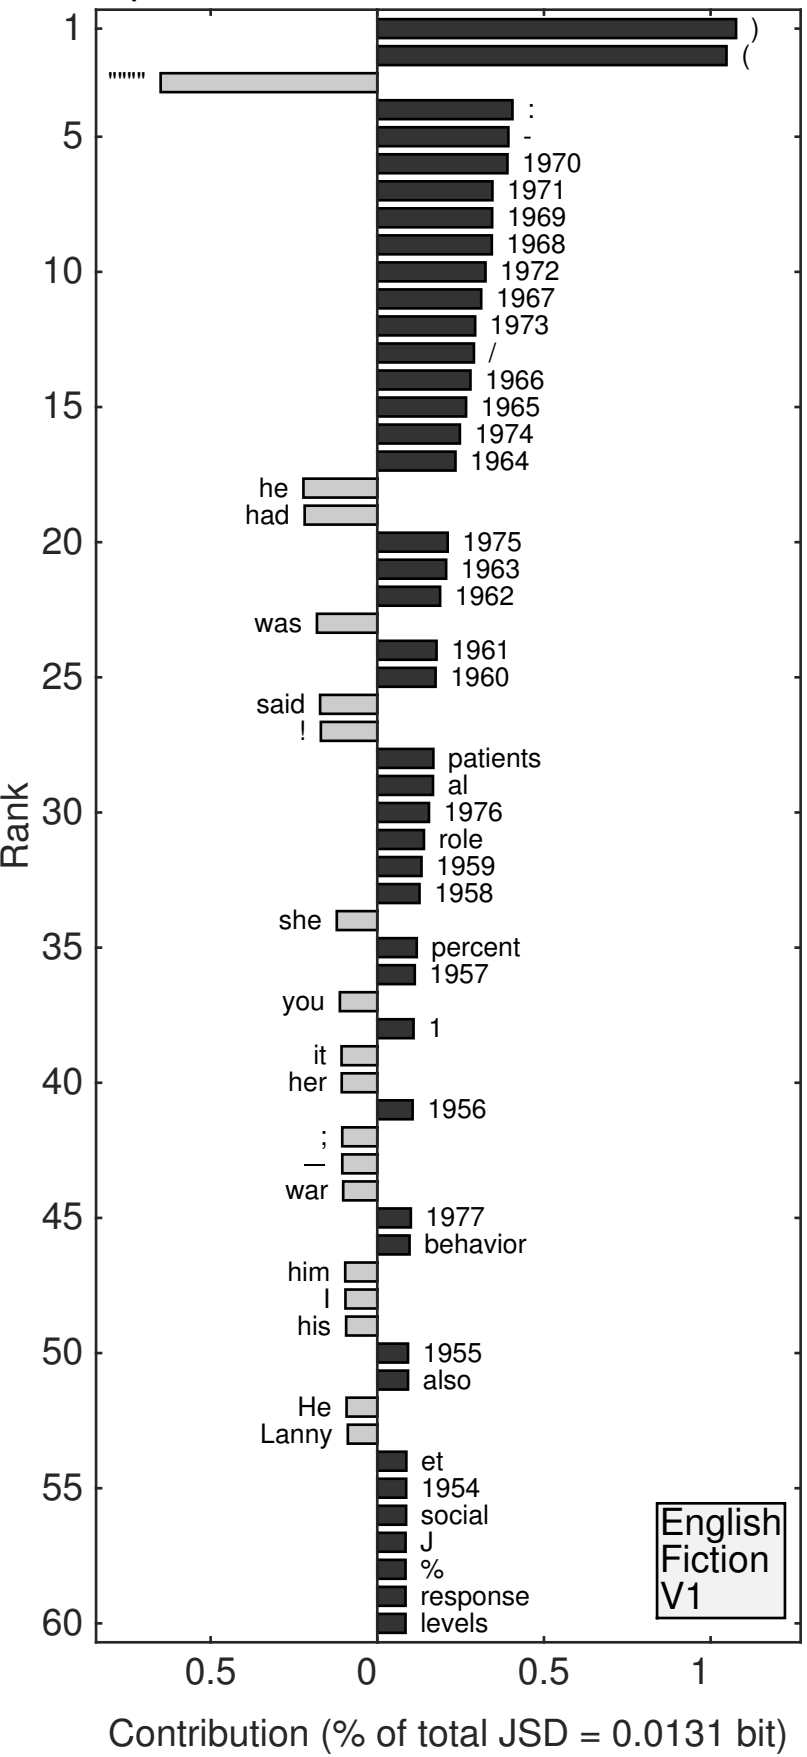

# Top JSD contributions: 1940s to 1980s

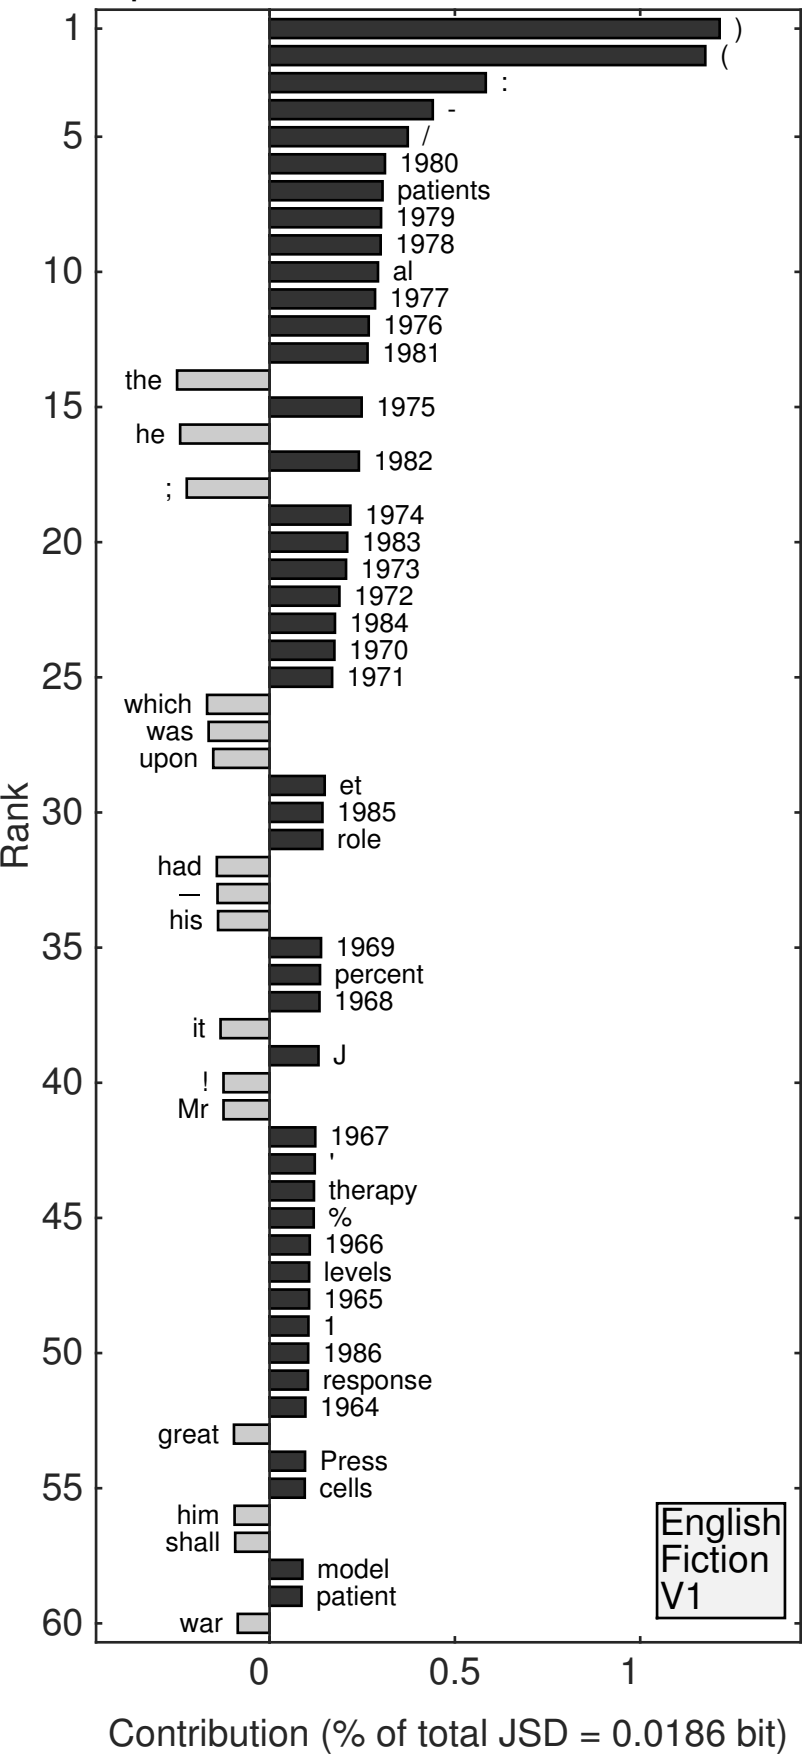

# Top JSD contributions: 1940s to 1990s

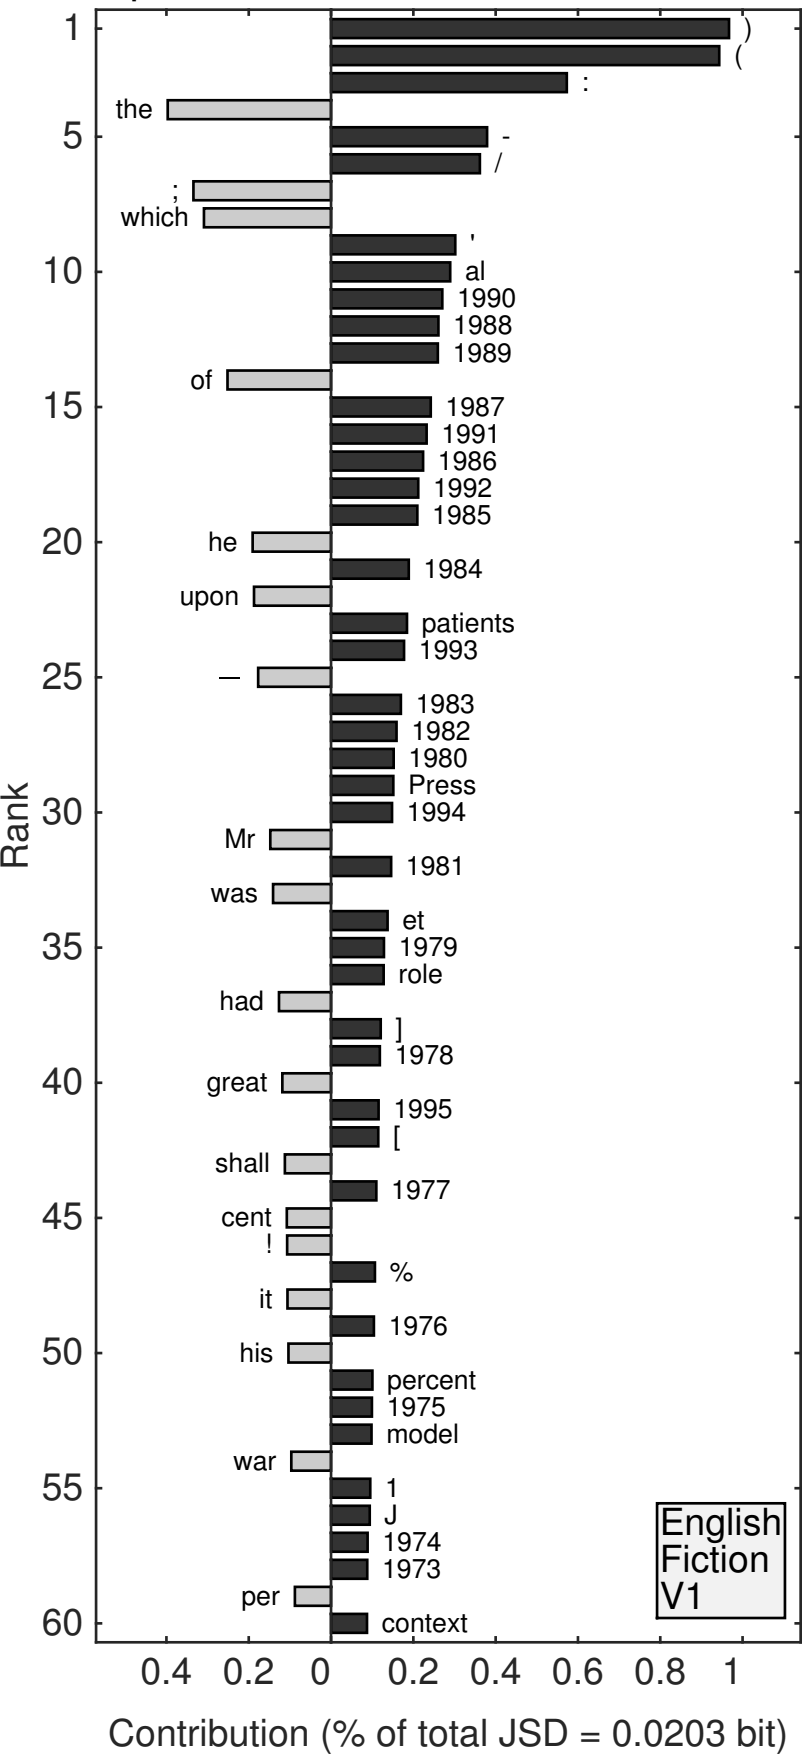

English Fiction V1

# Top JSD contributions: 1950s to 1960s

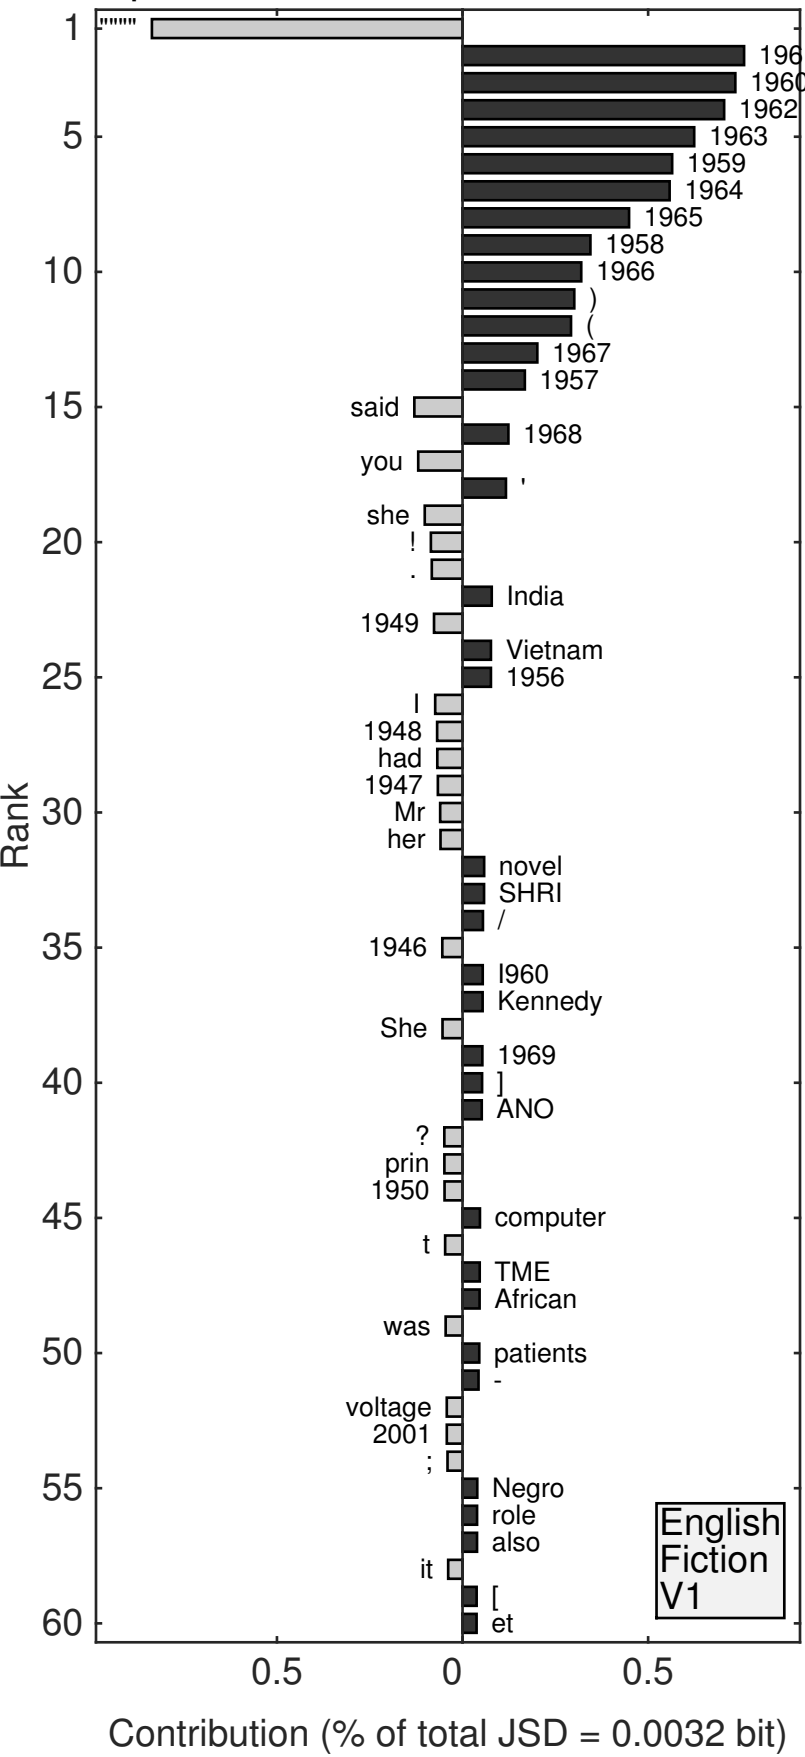

# Top JSD contributions: 1950s to 1970s

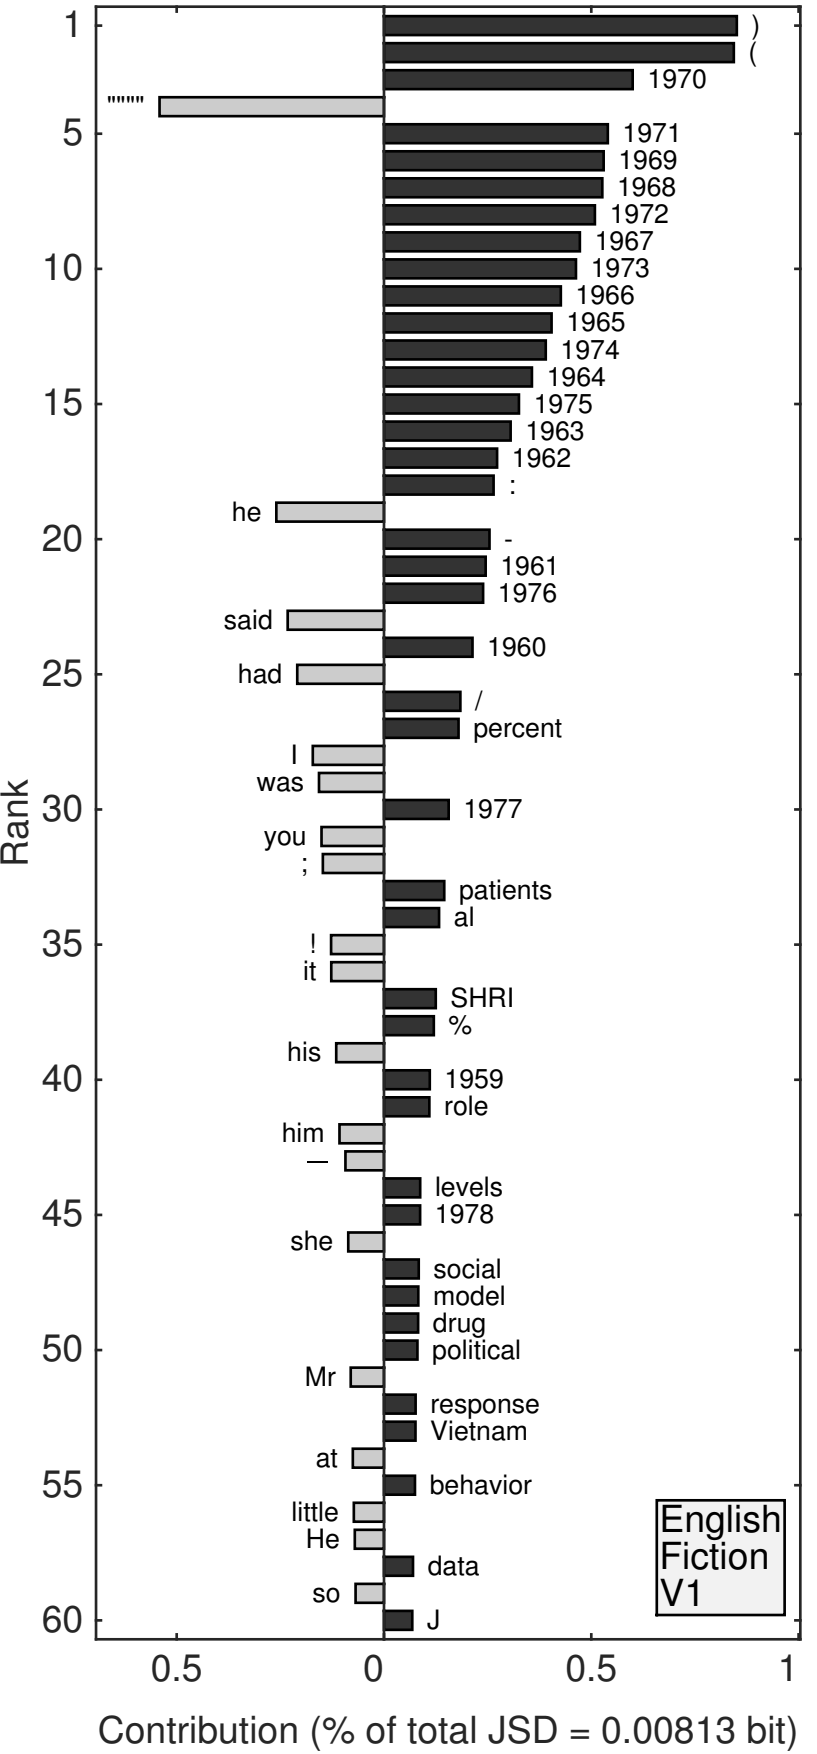

# Top JSD contributions: 1950s to 1980s

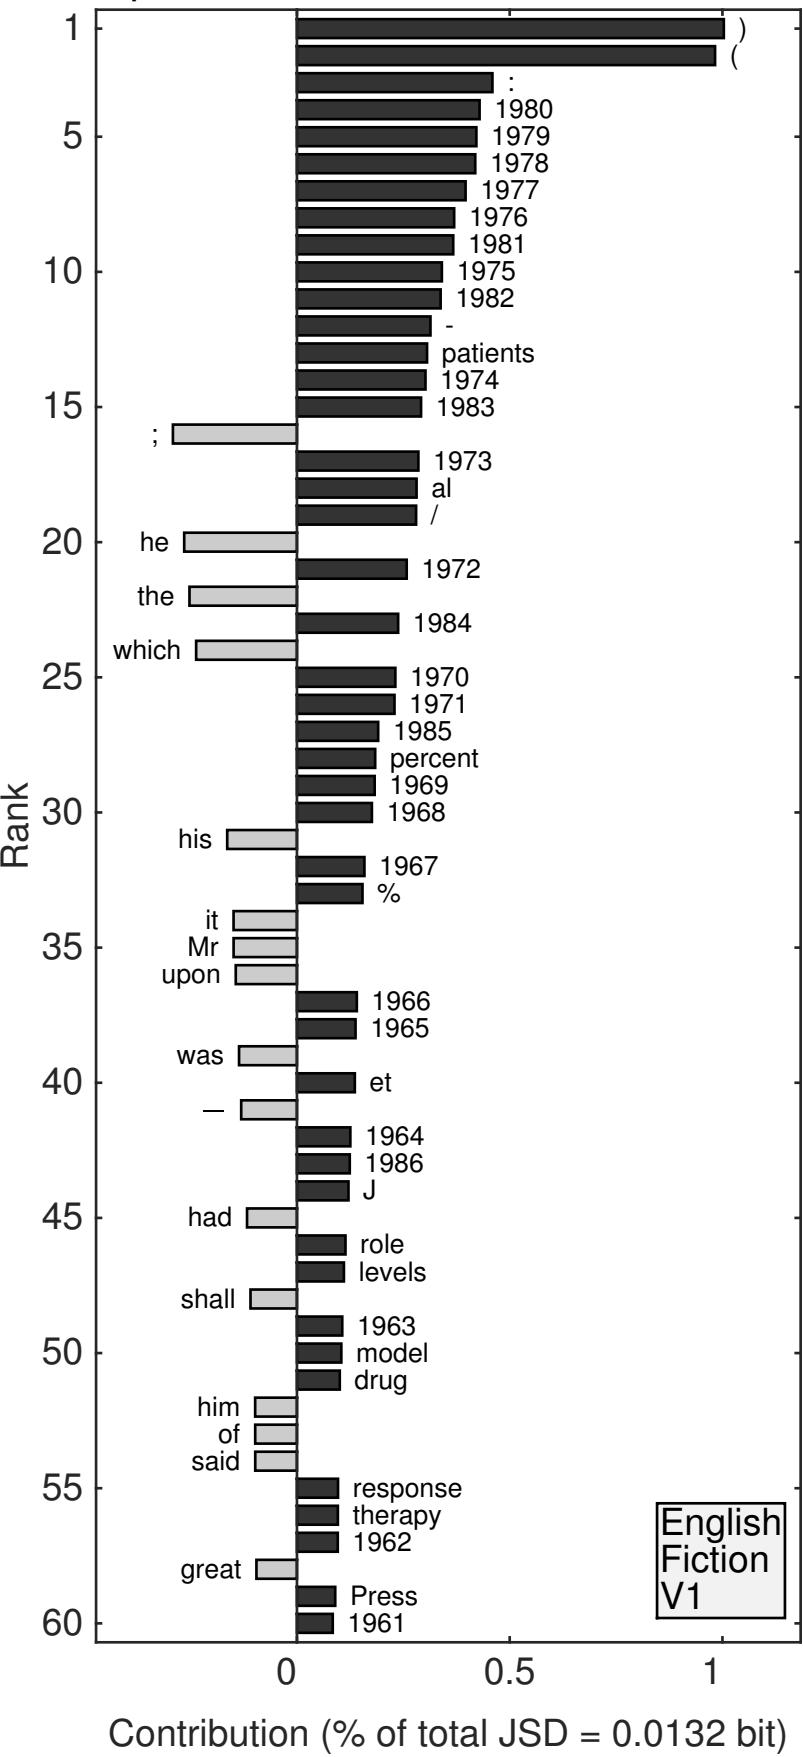

# Top JSD contributions: 1950s to 1990s

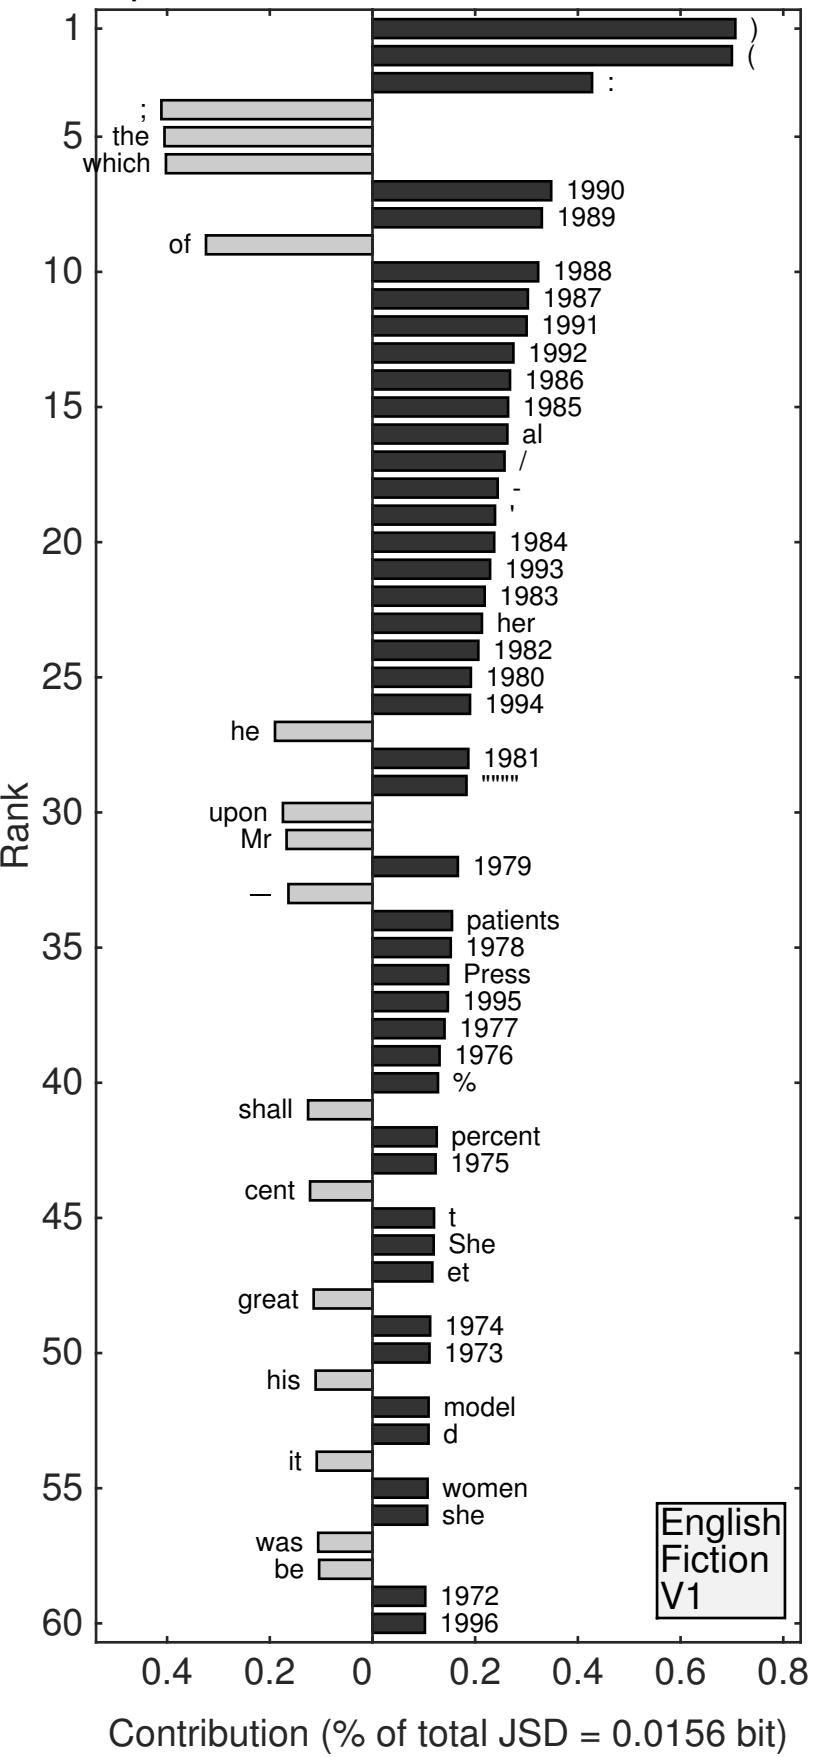

English Fiction V1



# Top JSD contributions: 1960s to 1970s

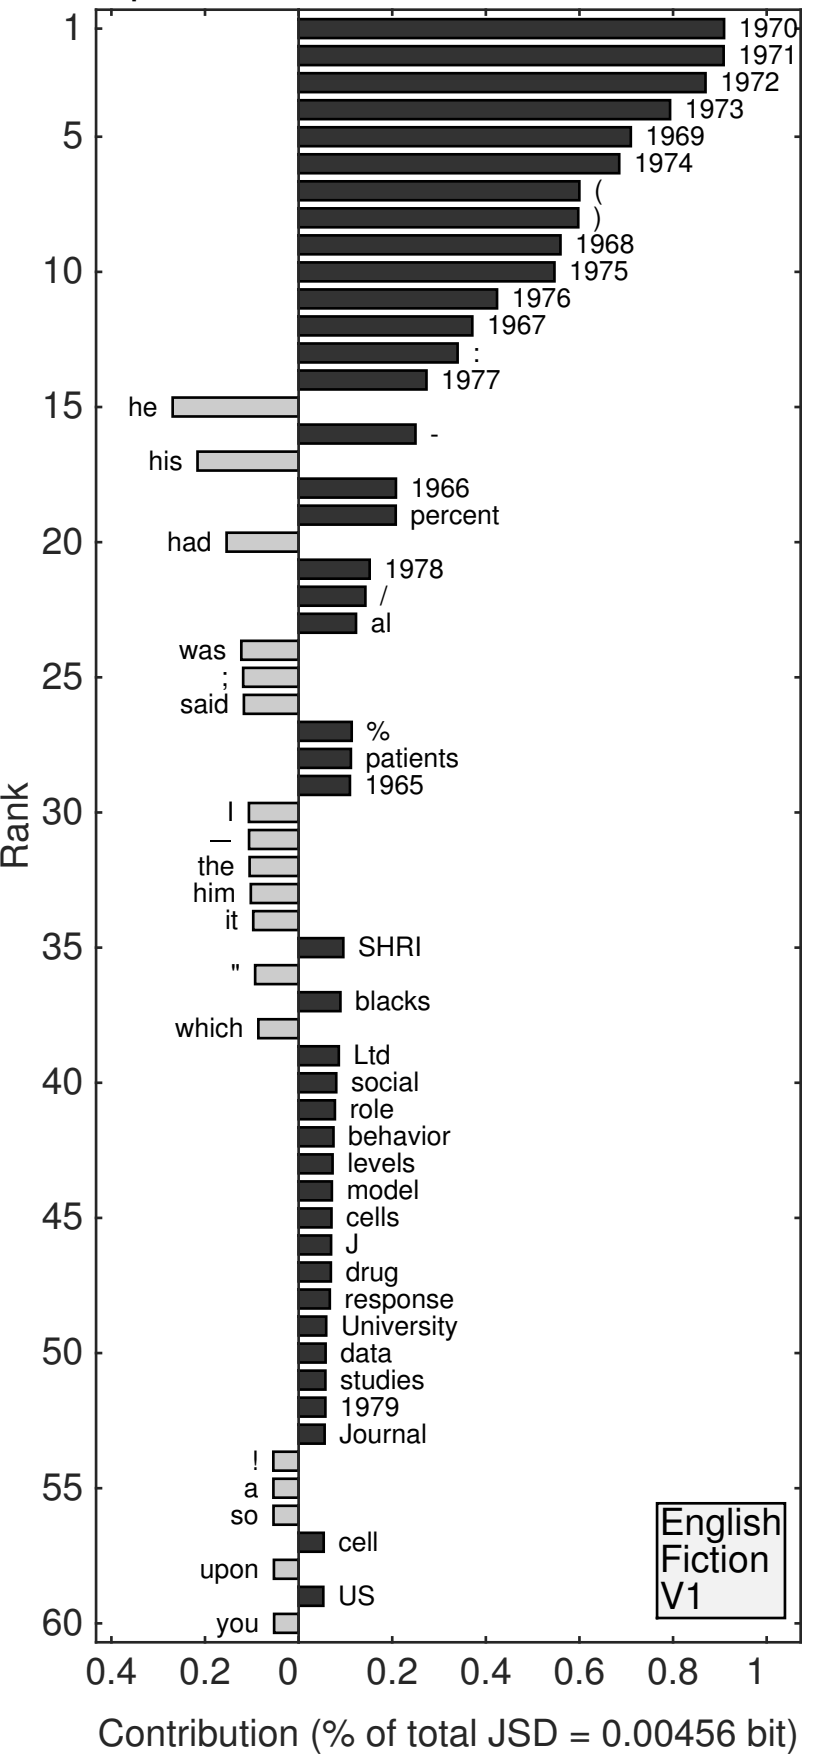

# Top JSD contributions: 1960s to 1980s

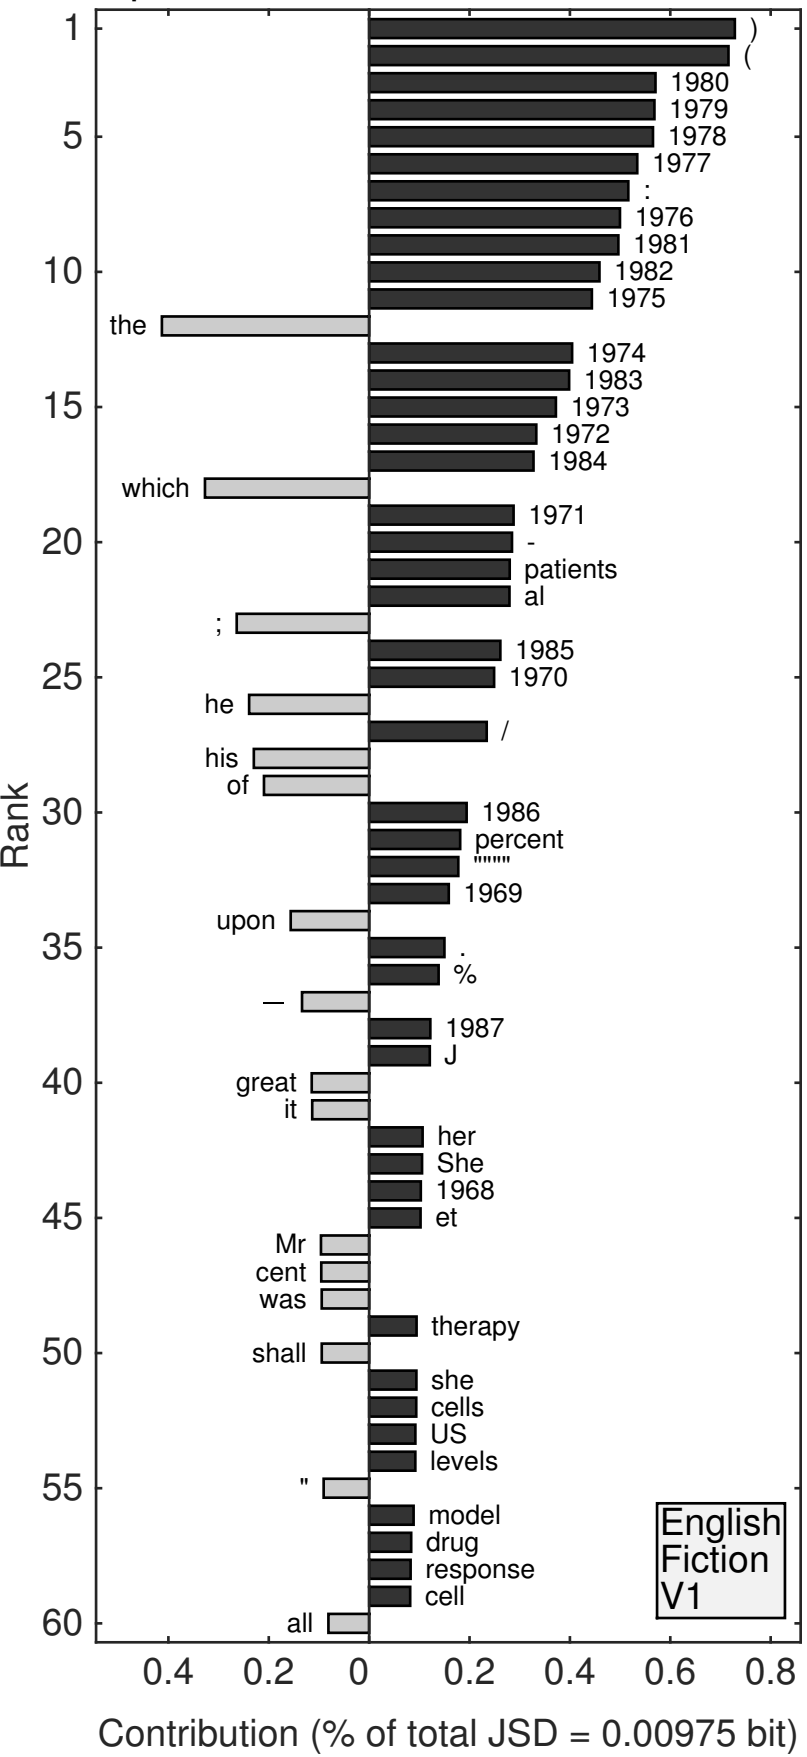

# Top JSD contributions: 1960s to 1990s

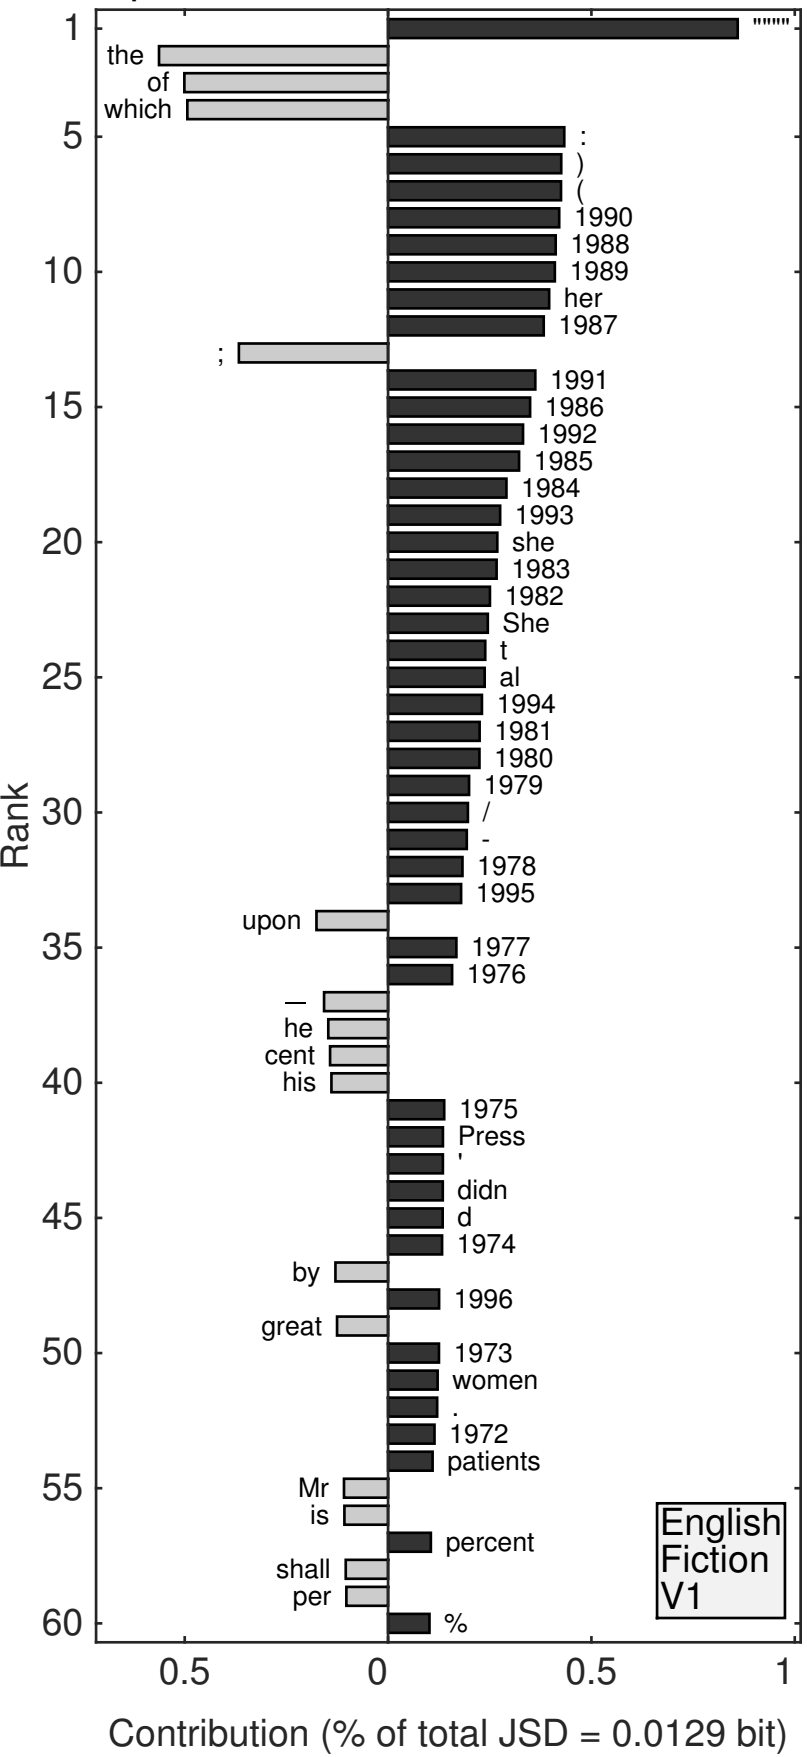

English Fiction V1

# Top JSD contributions: 1970s to 1980s

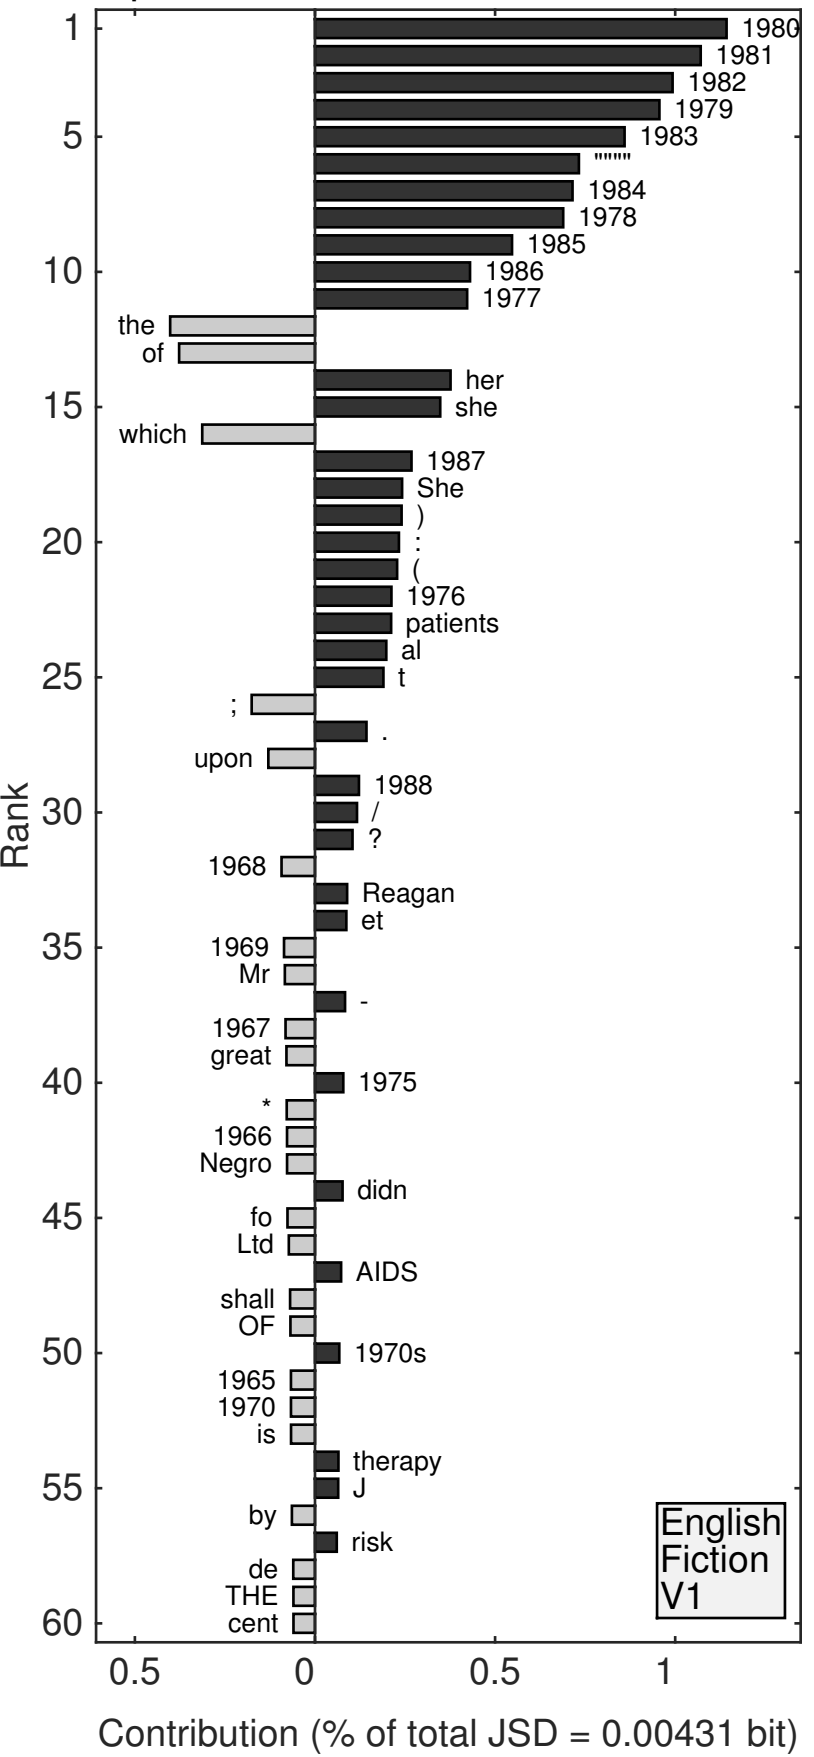

English Fiction V1

Contribution (% of total JSD = 0.00431 bit)

# Top JSD contributions: 1970s to 1990s

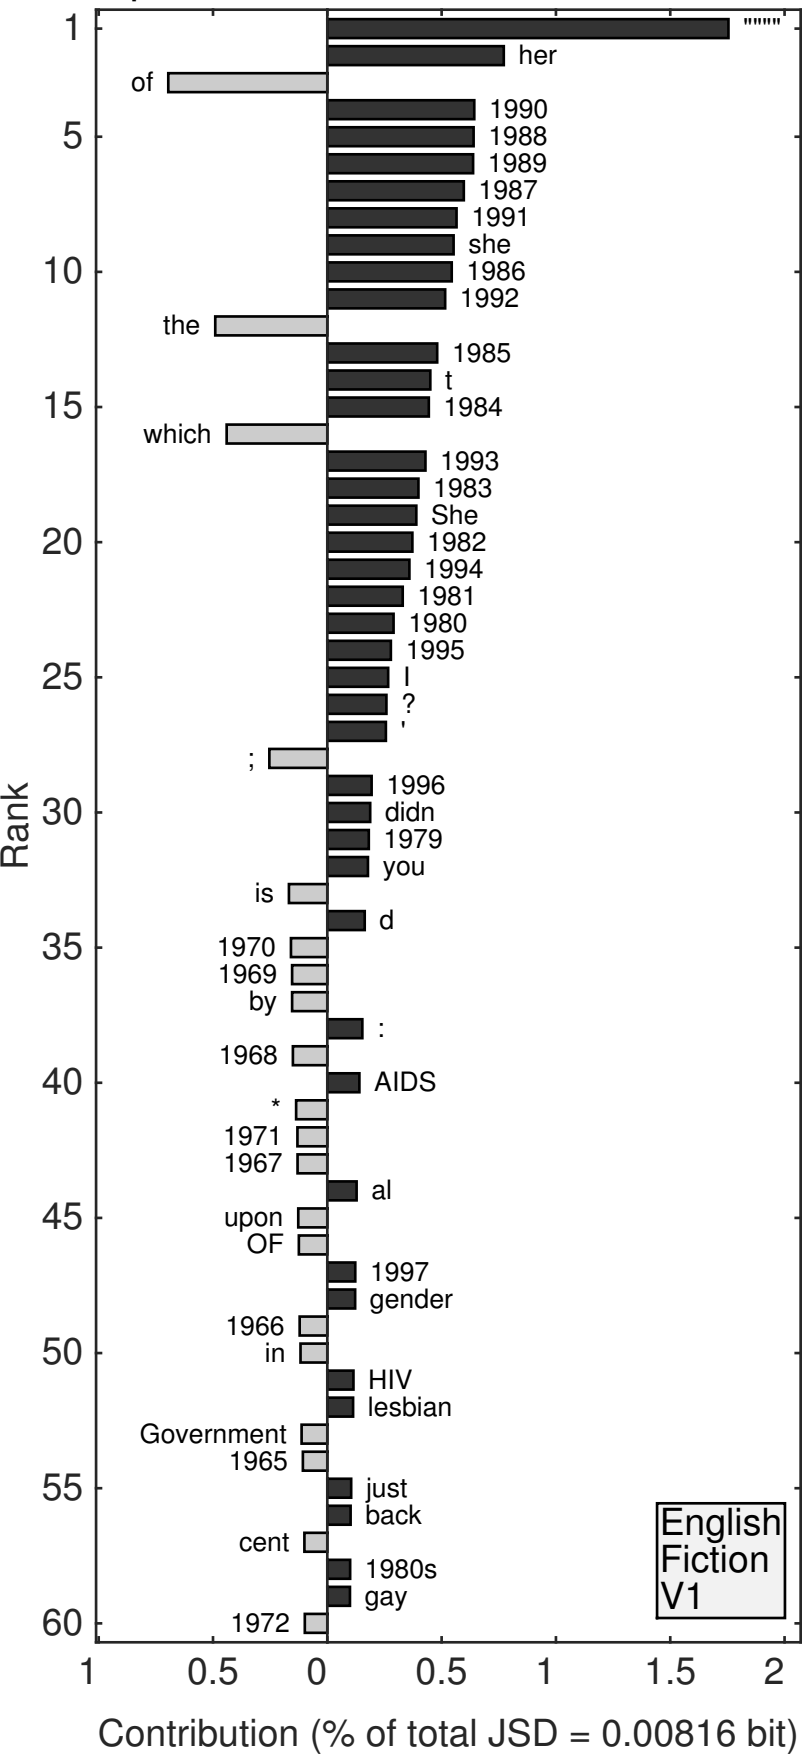

# Top JSD contributions: 1980s to 1990s

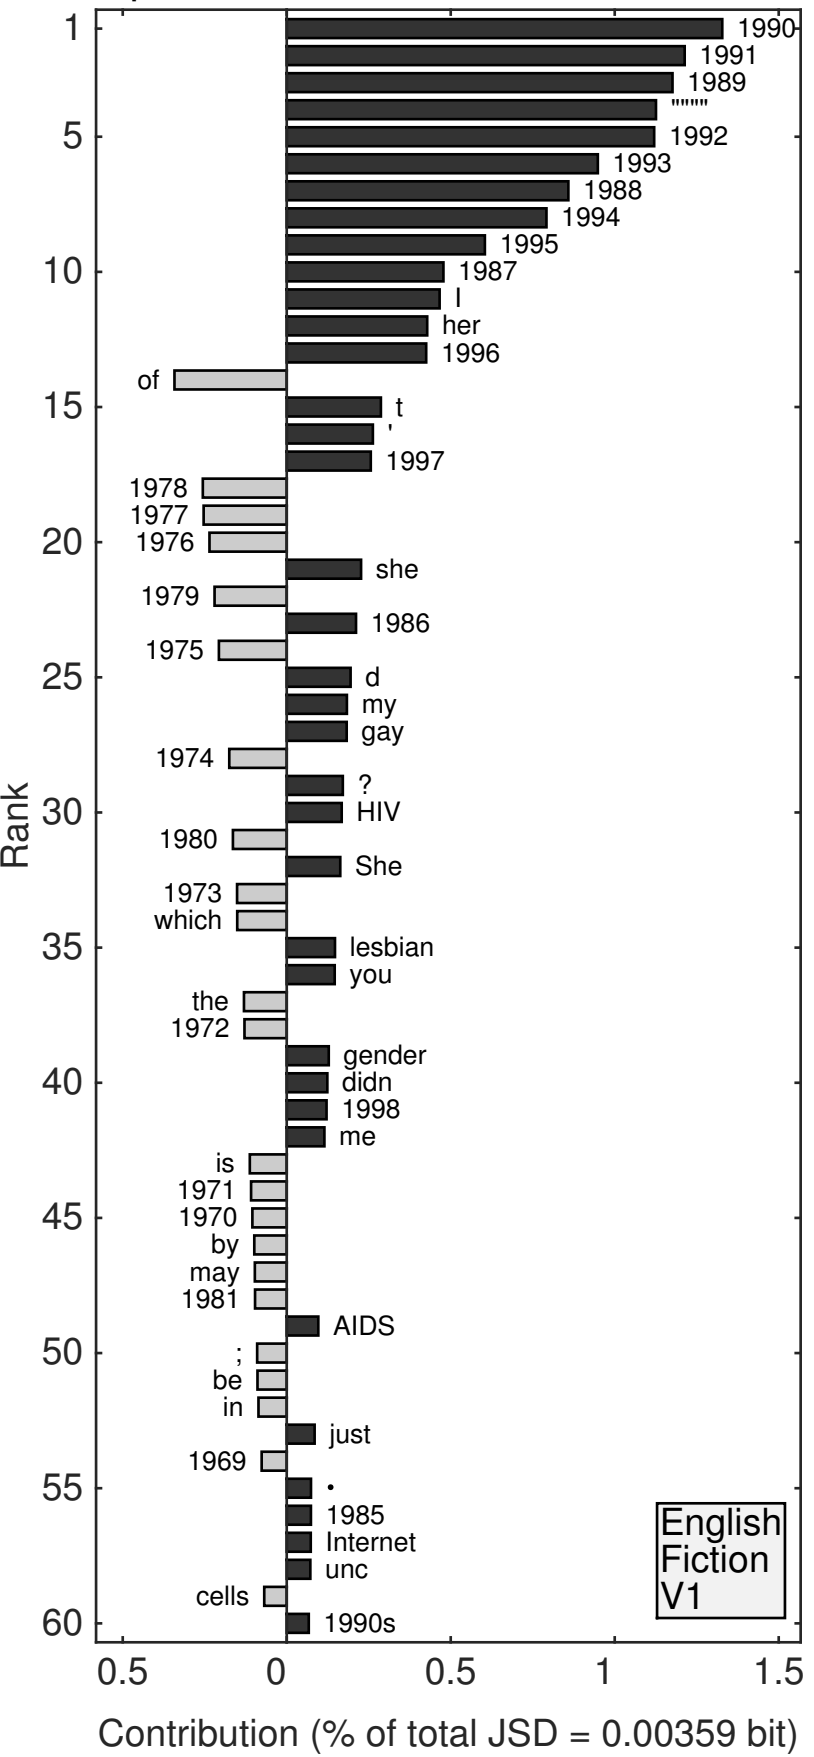

Supplement: pone.0137041.s004.pdf [file pone.0137041.s004.pdf]
